# Supplementary material
Source: PubMed Central journal article supplement (PMC6126389)

## Supplementary MS2 Spectra

Chlorosis as a developmental program in cyanobacteria:  
the proteomic fundament for survival and awakening

Shown are the MS2 spectra with the best phosphorylation site localization (corresponding to Supplementary Table S8; column AH). The position of the phosphorylation site(s) in the protein sequences are indicated, if localized, in column D.

Fragment ions with a loss of phosphoric acid ( $-97.97$  Th) are indicated by a star (\*) in the spectra.

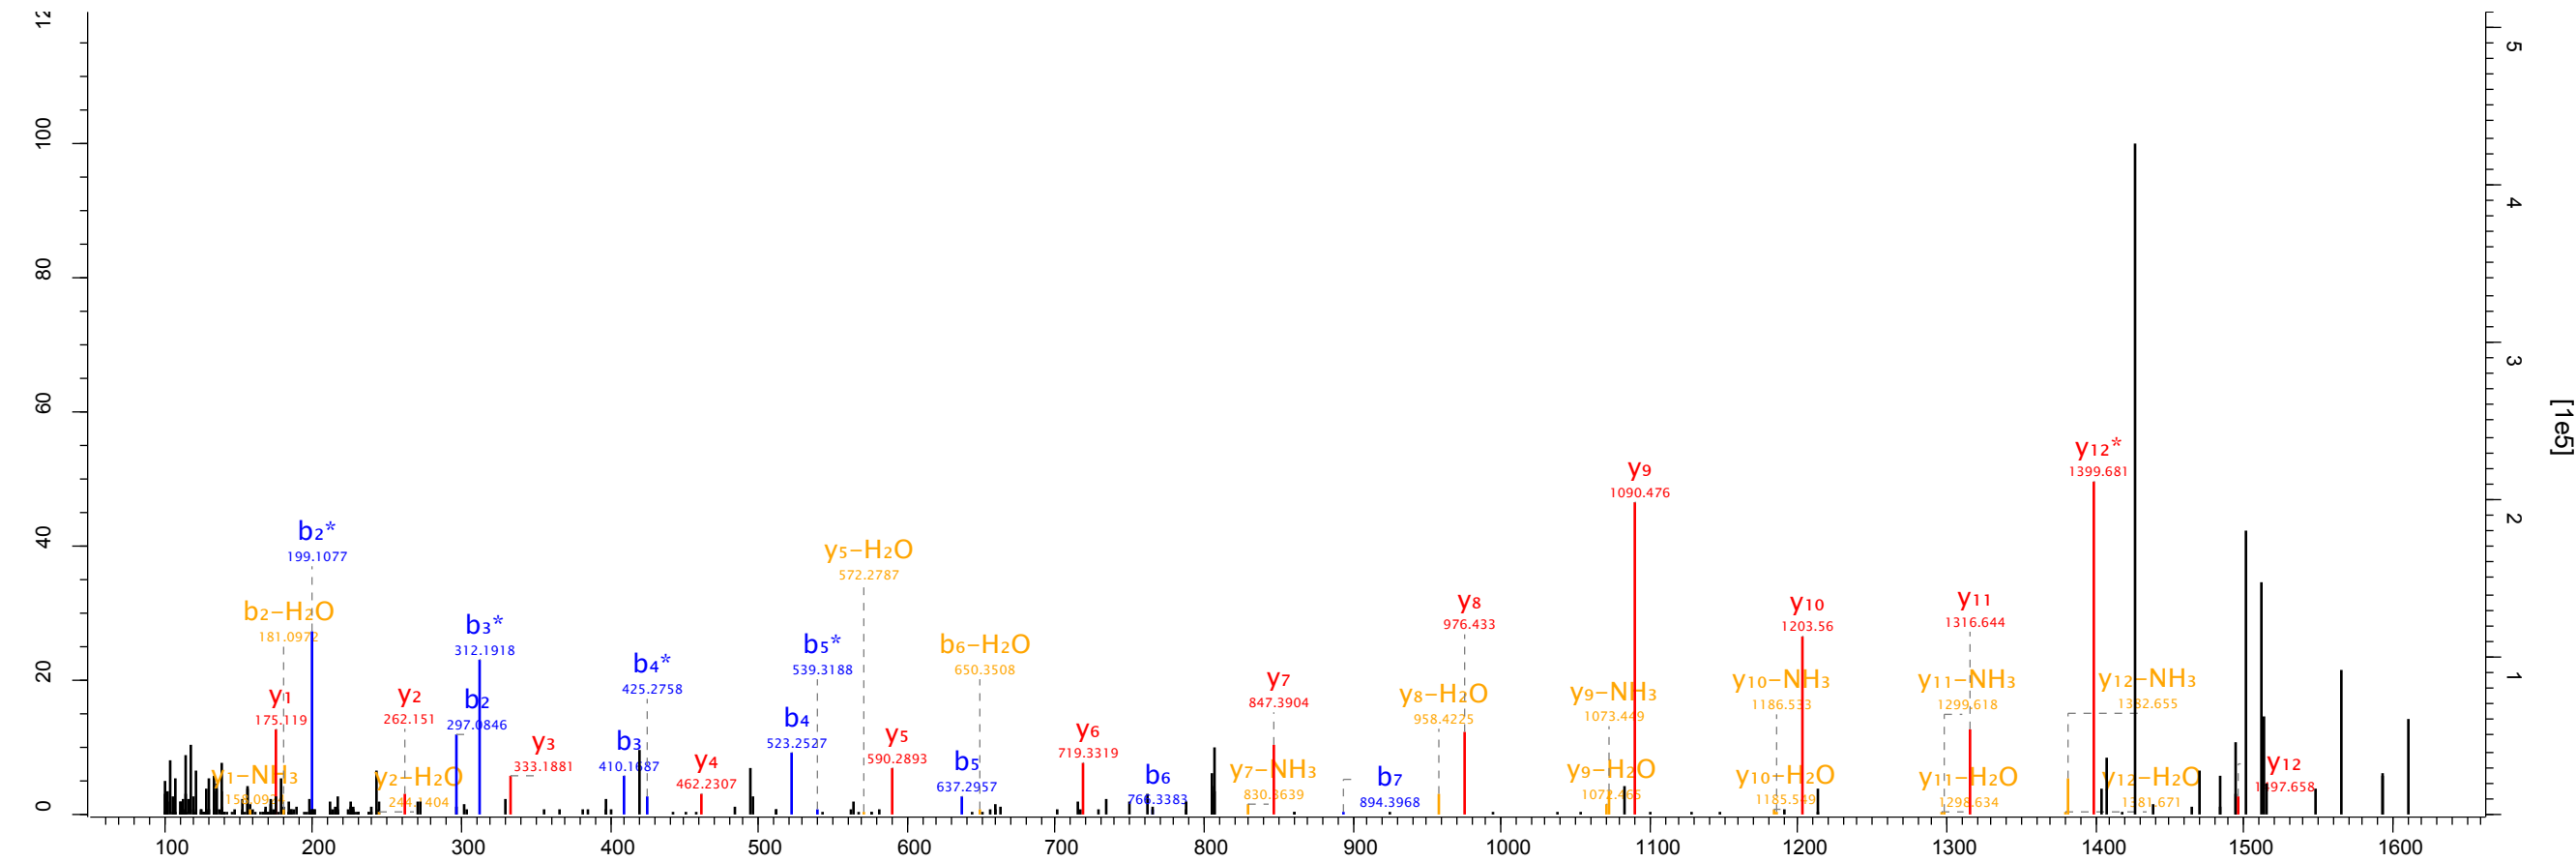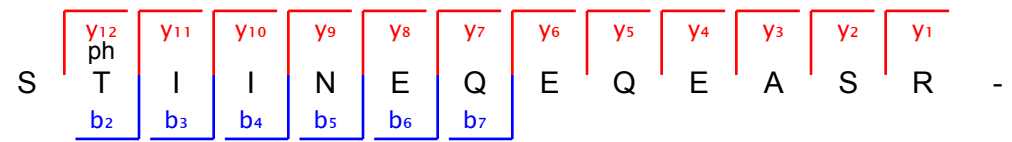

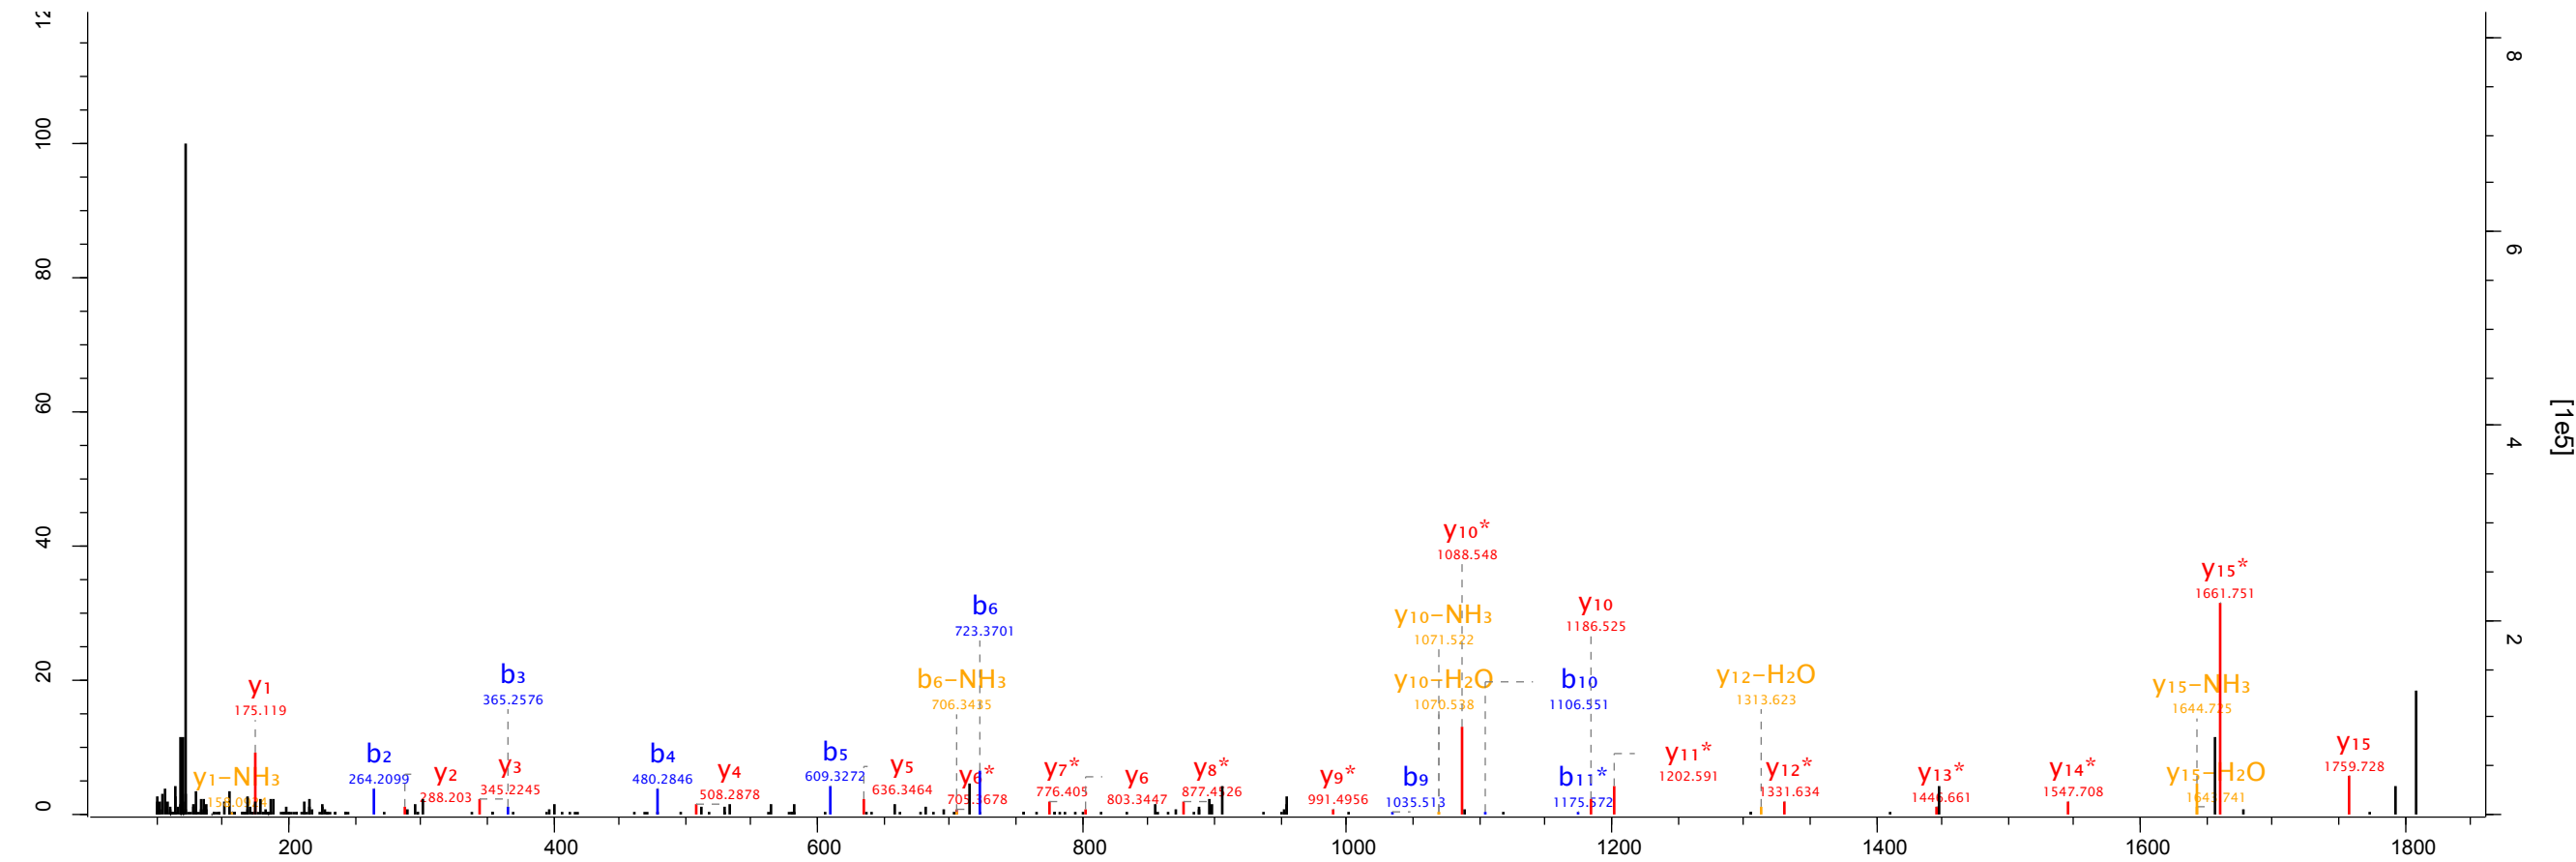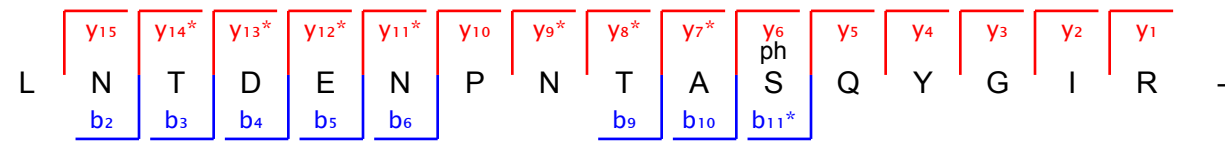



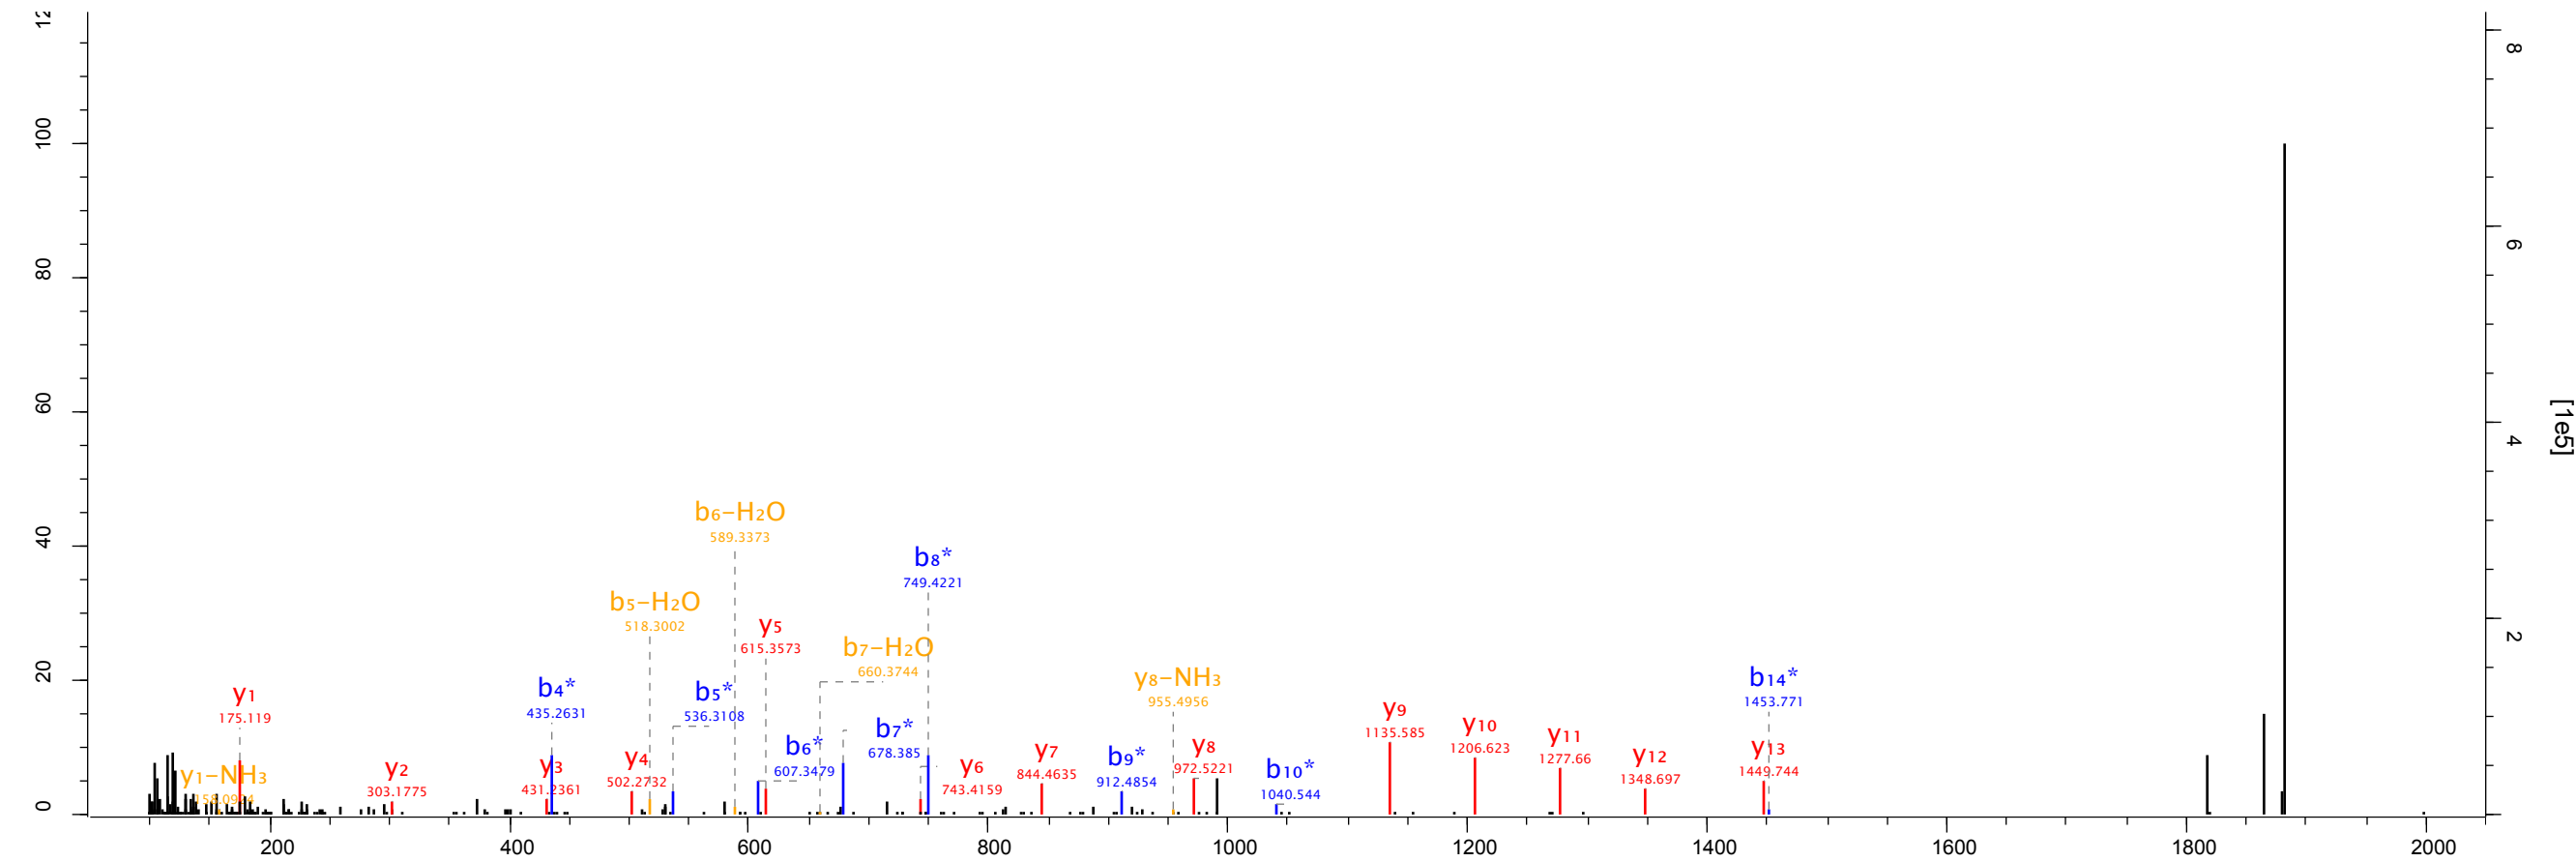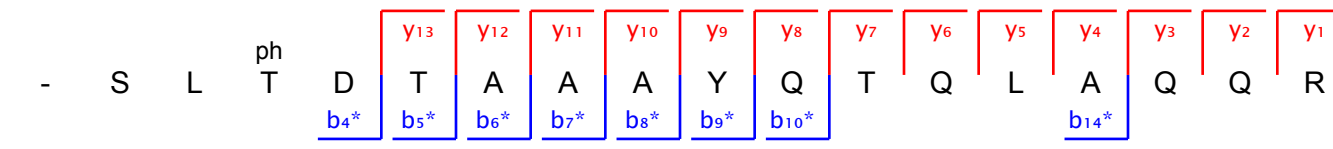

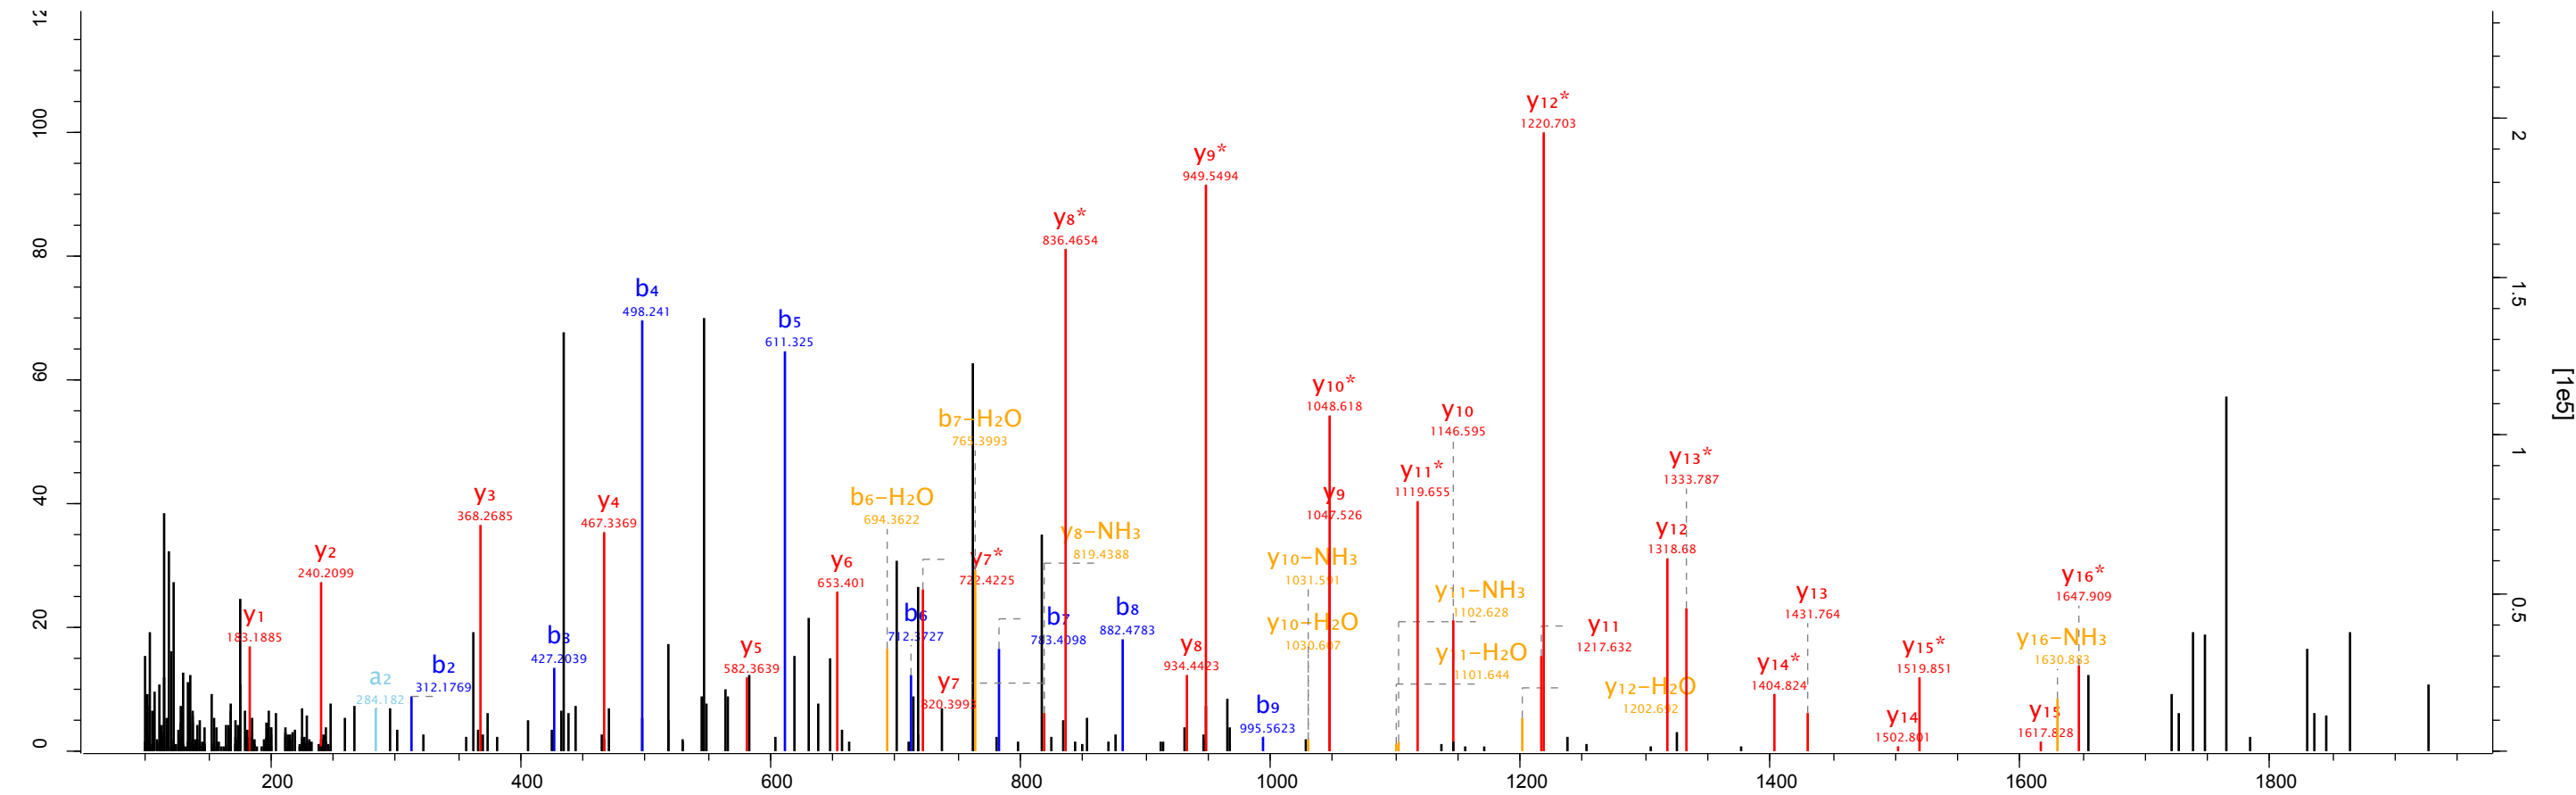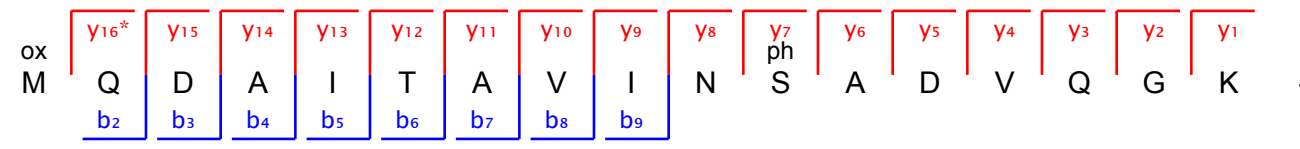

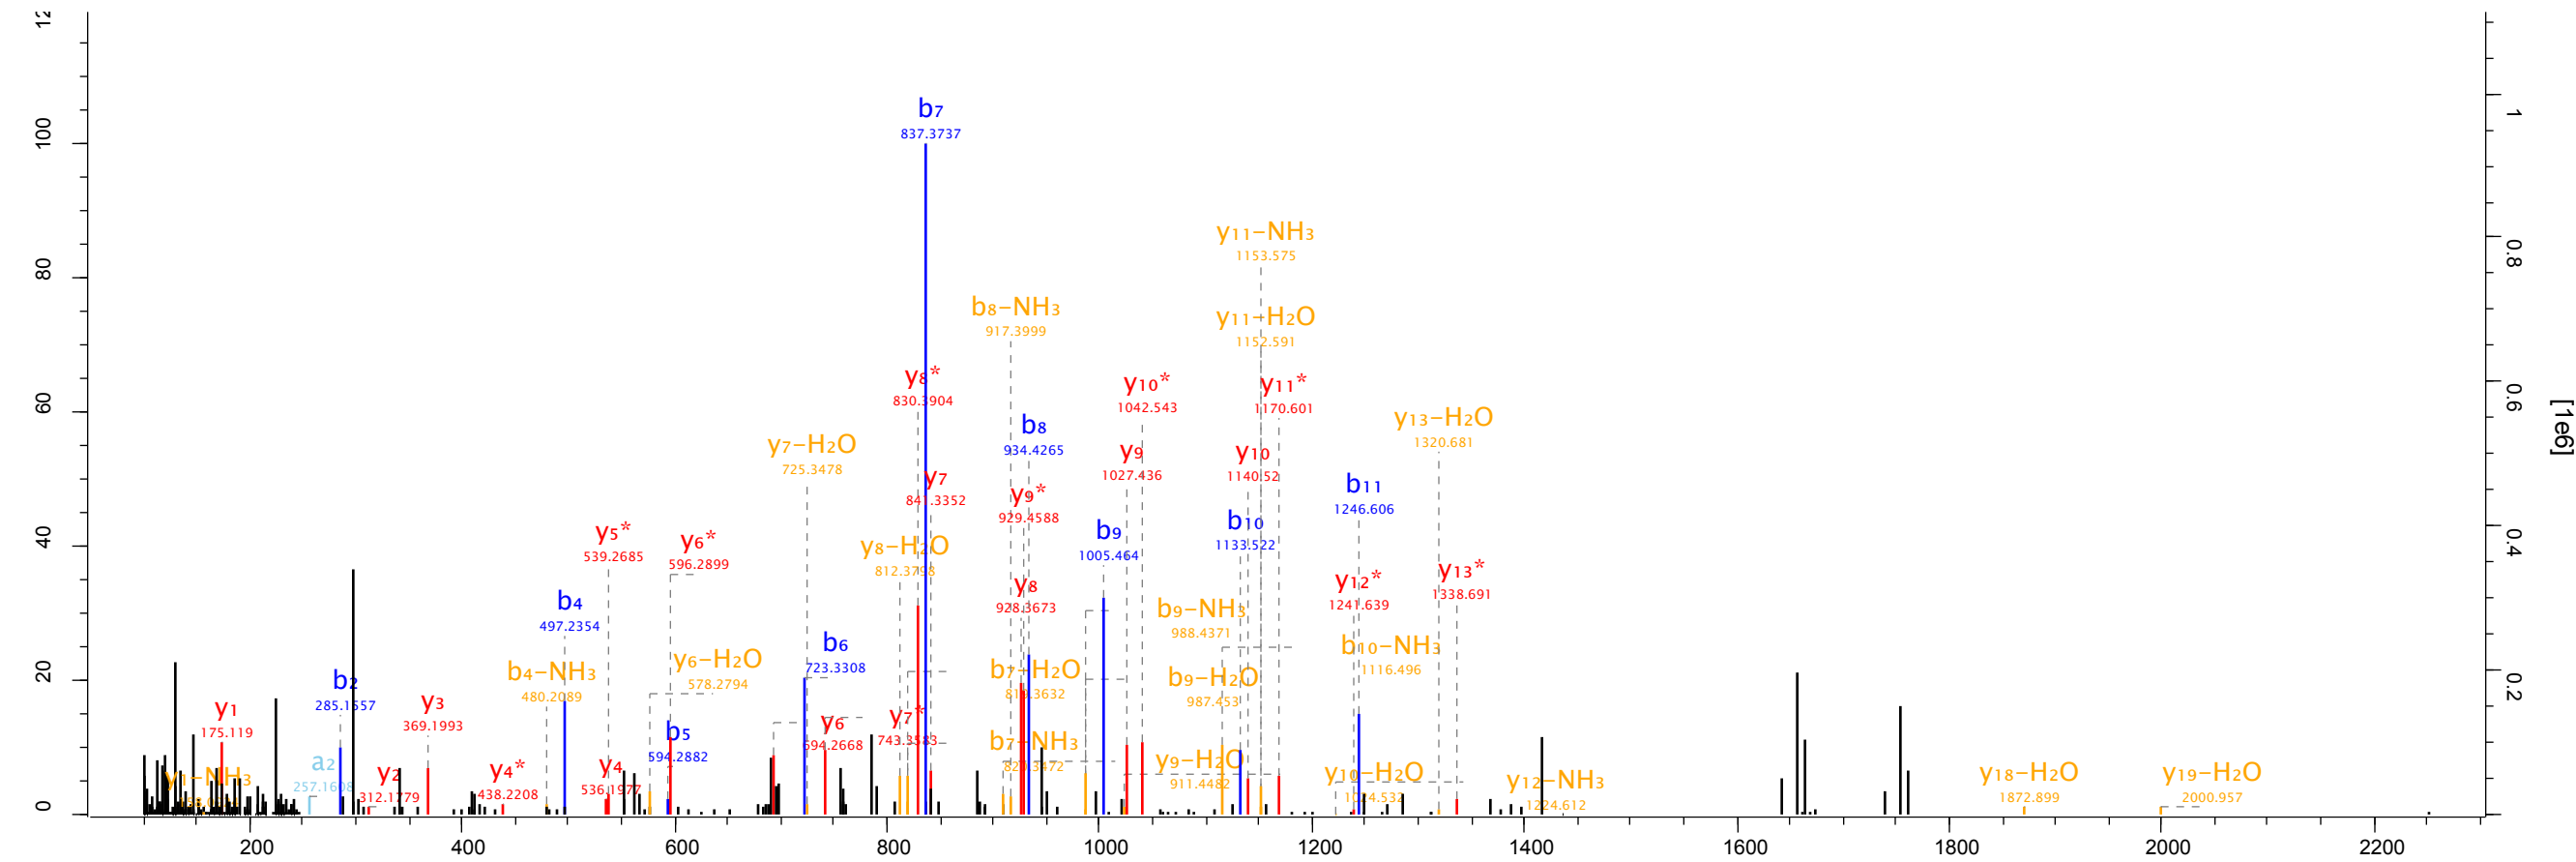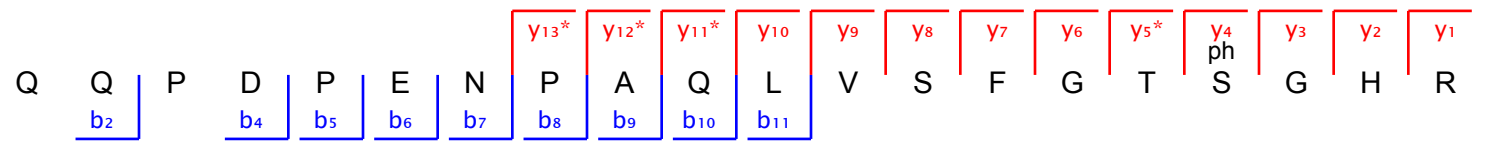

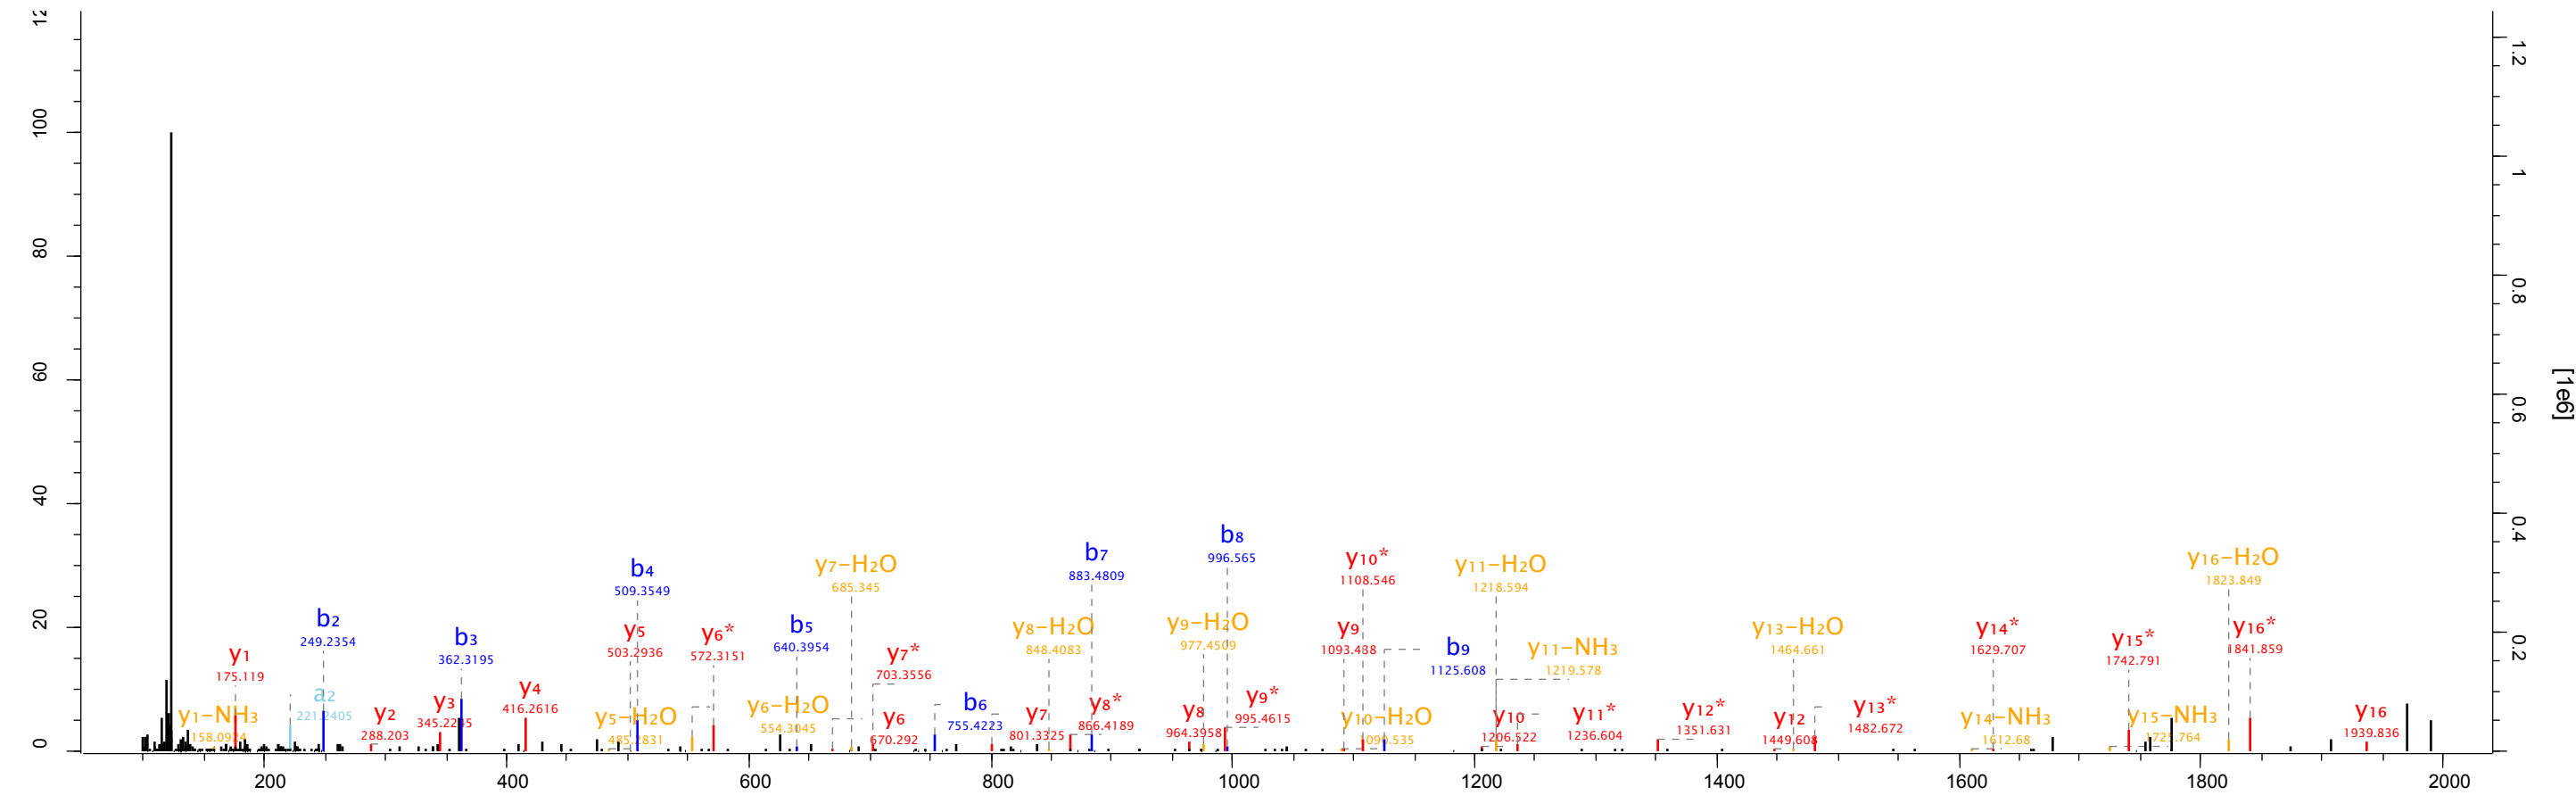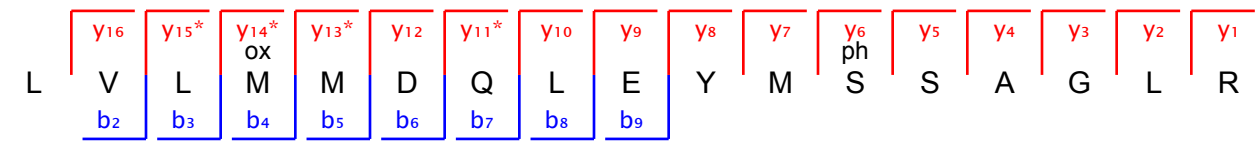



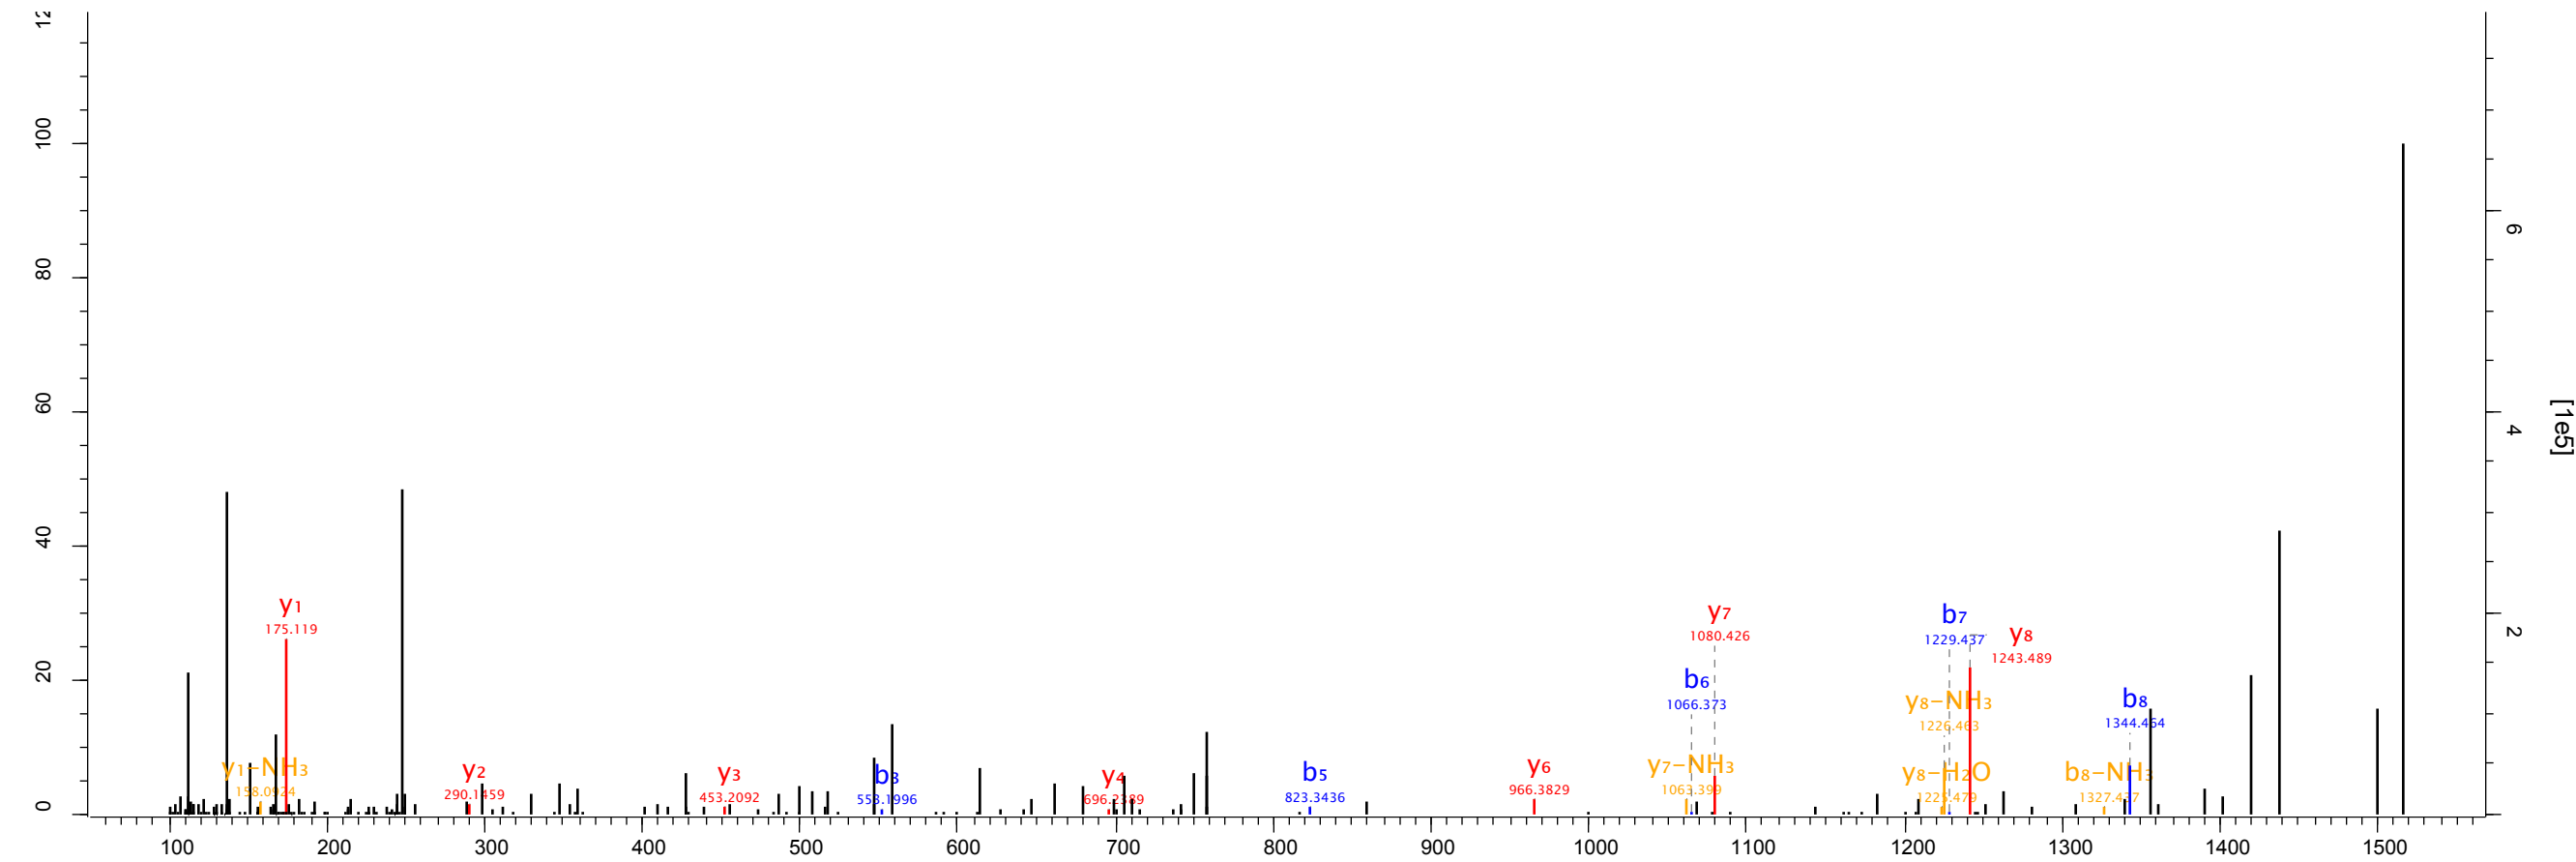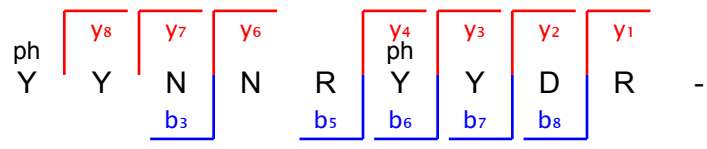

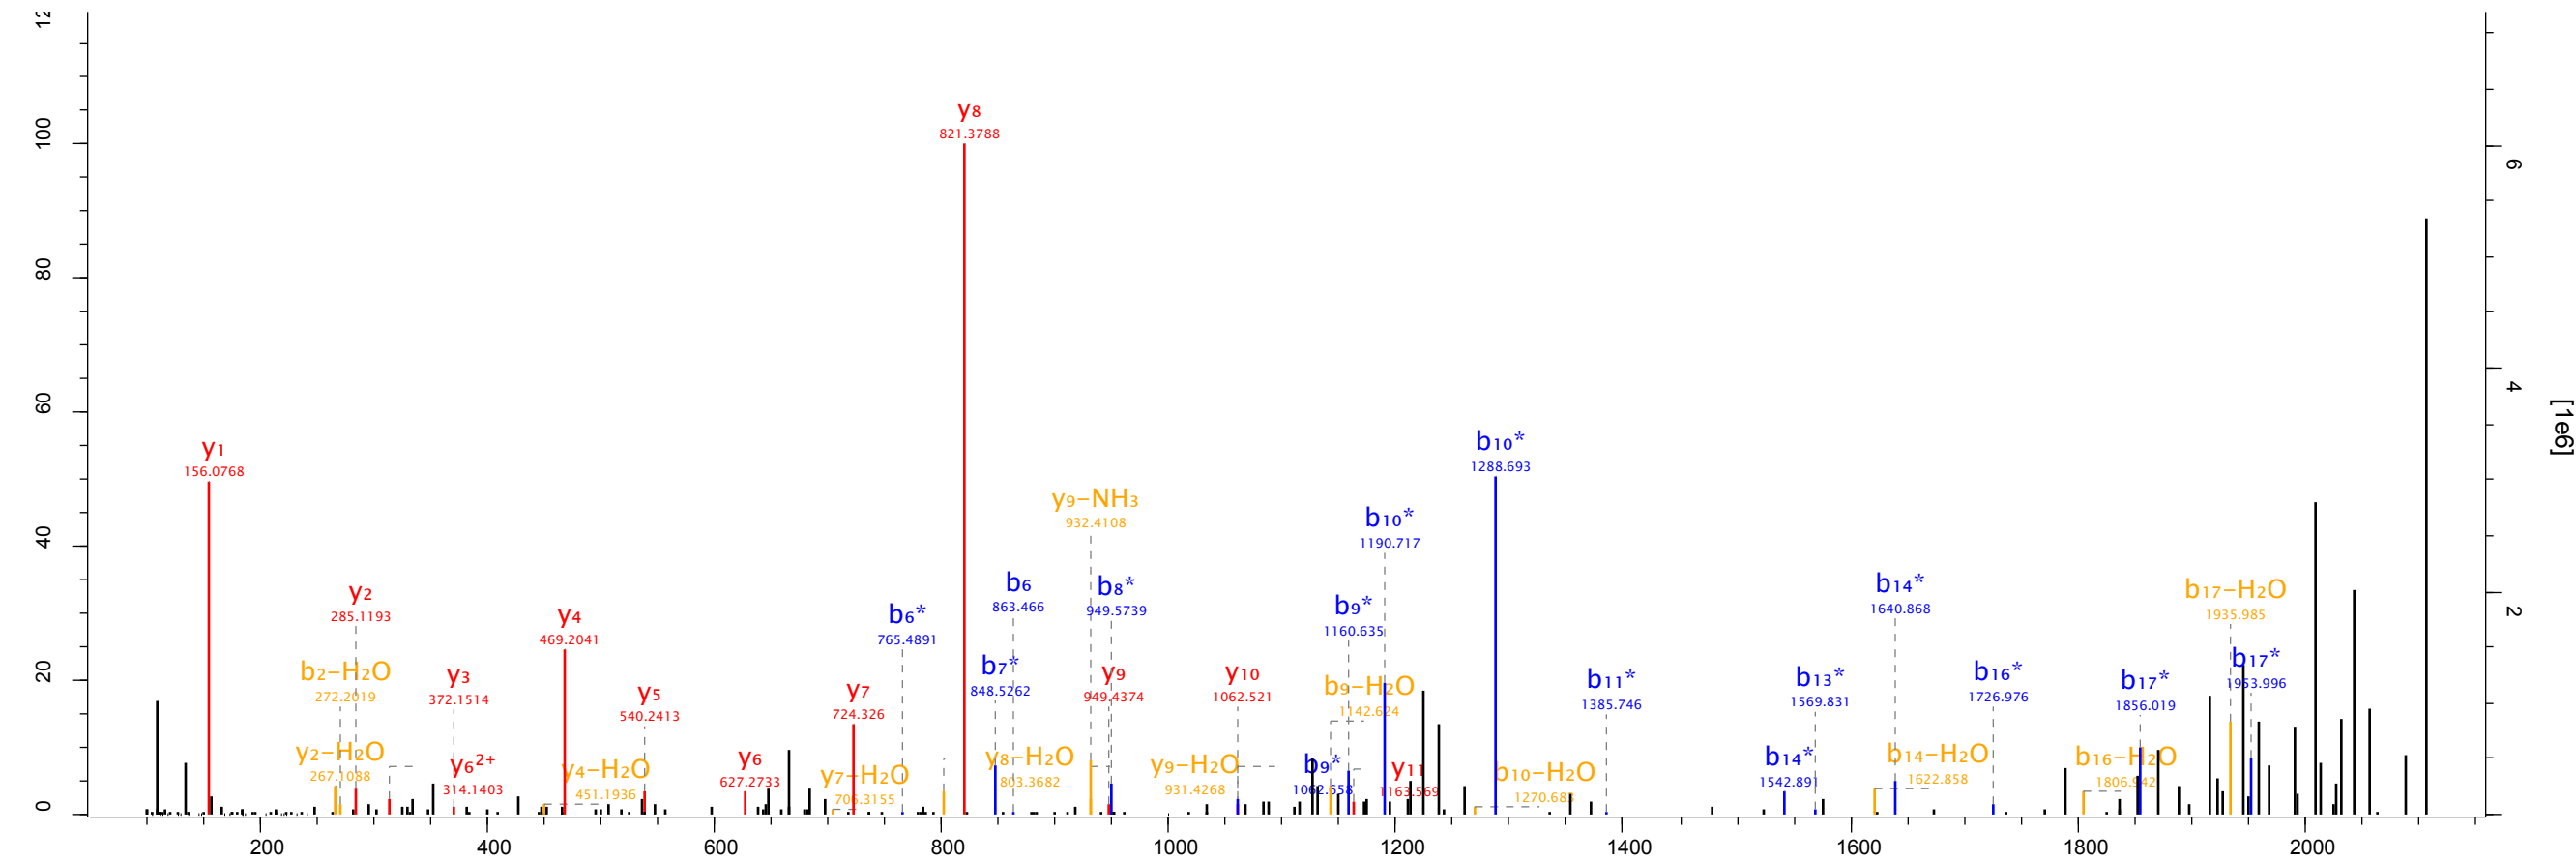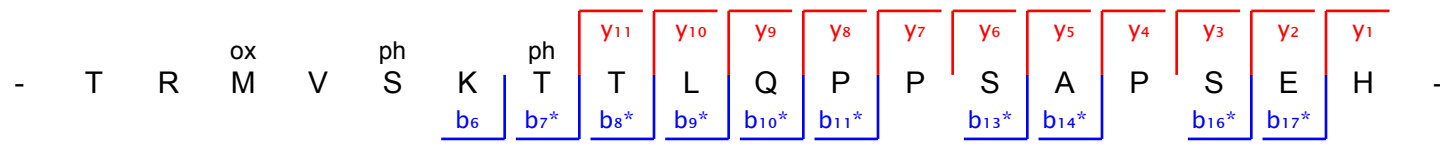

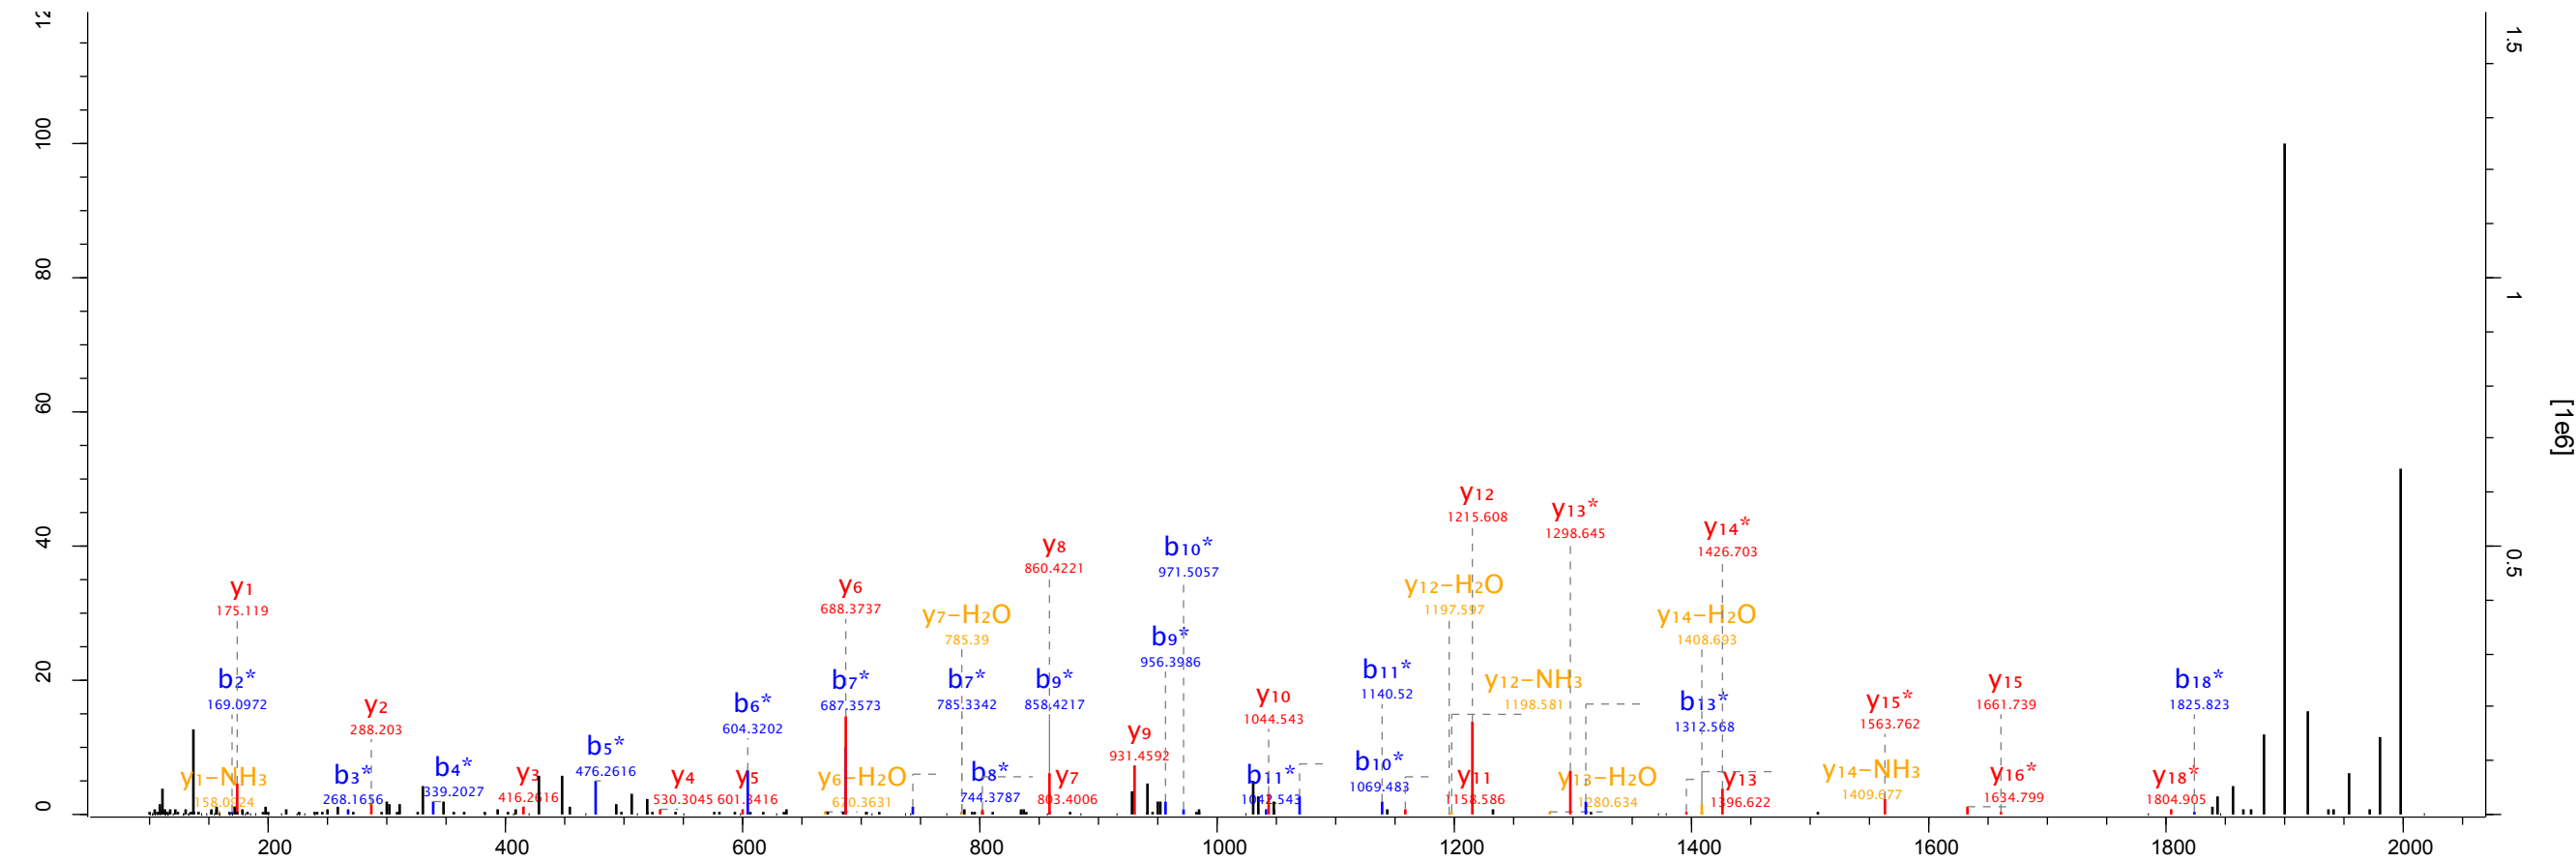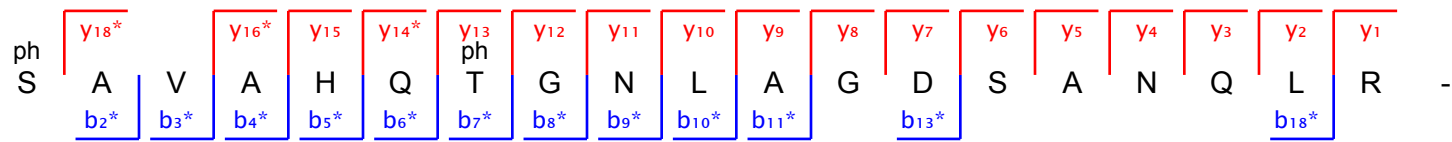

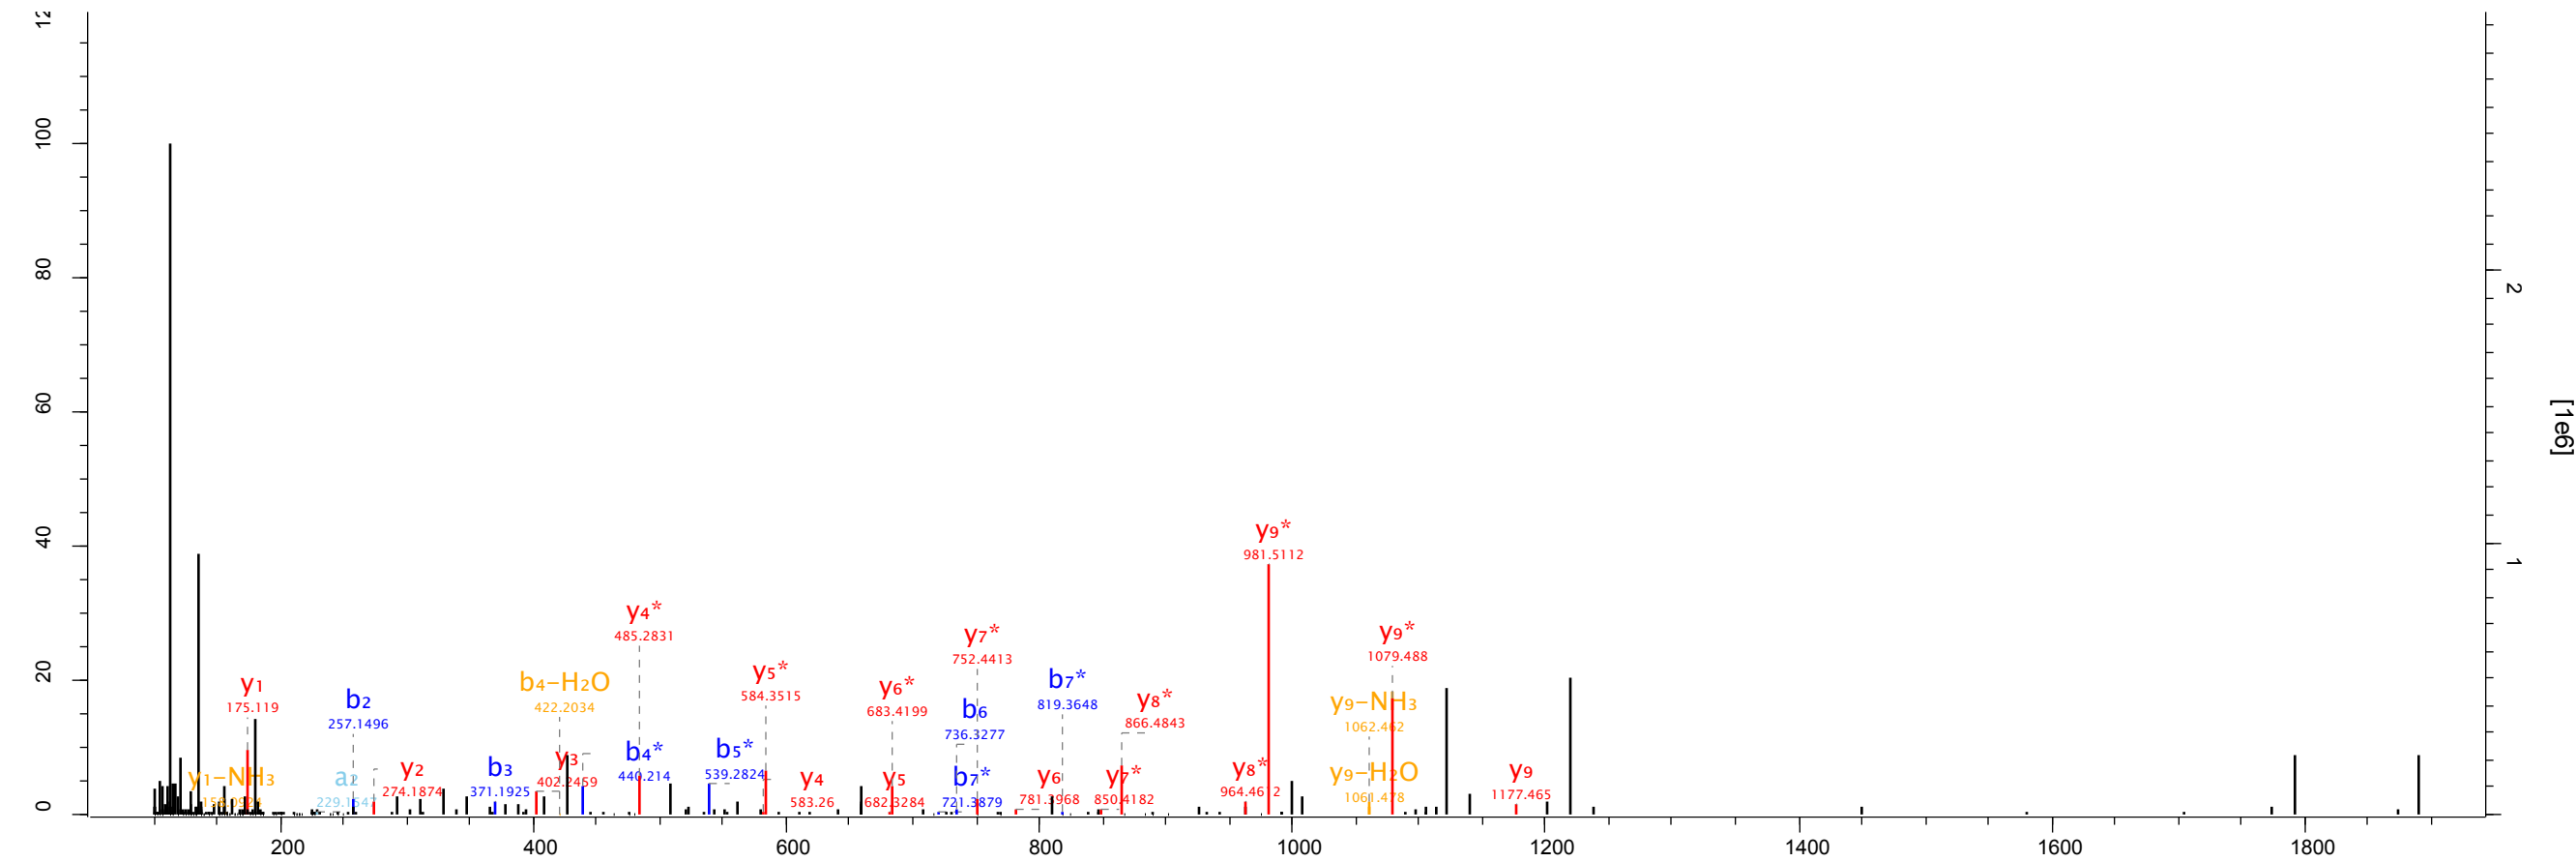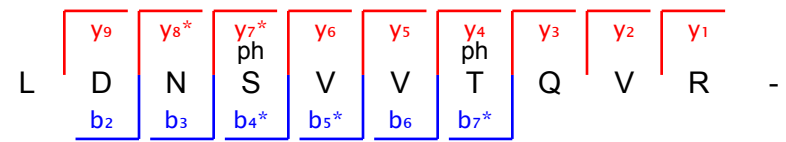

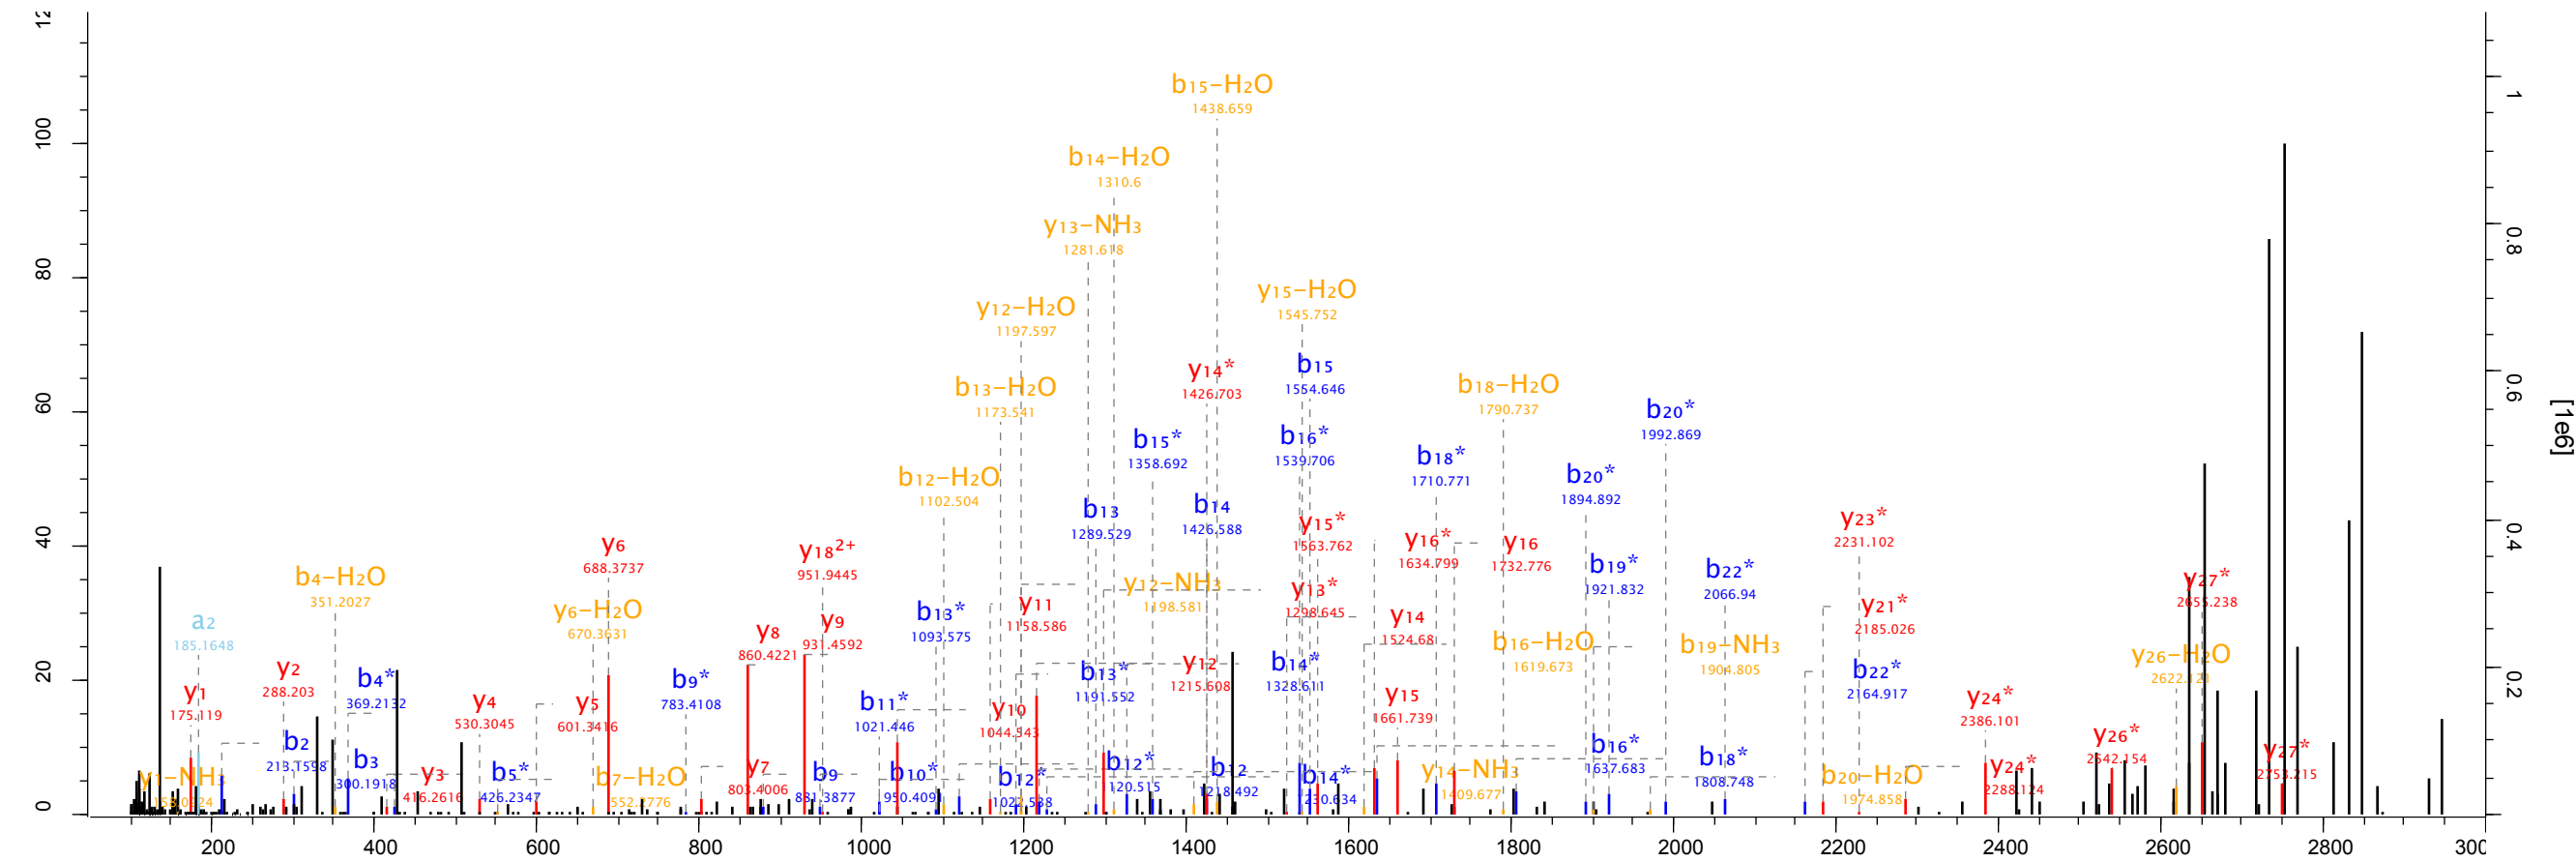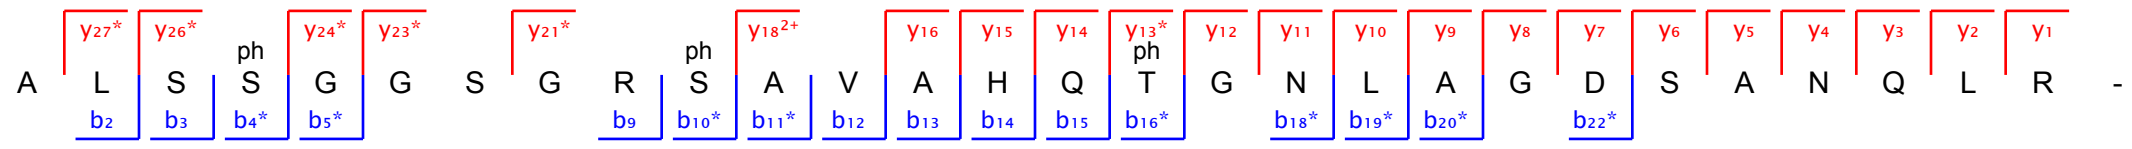

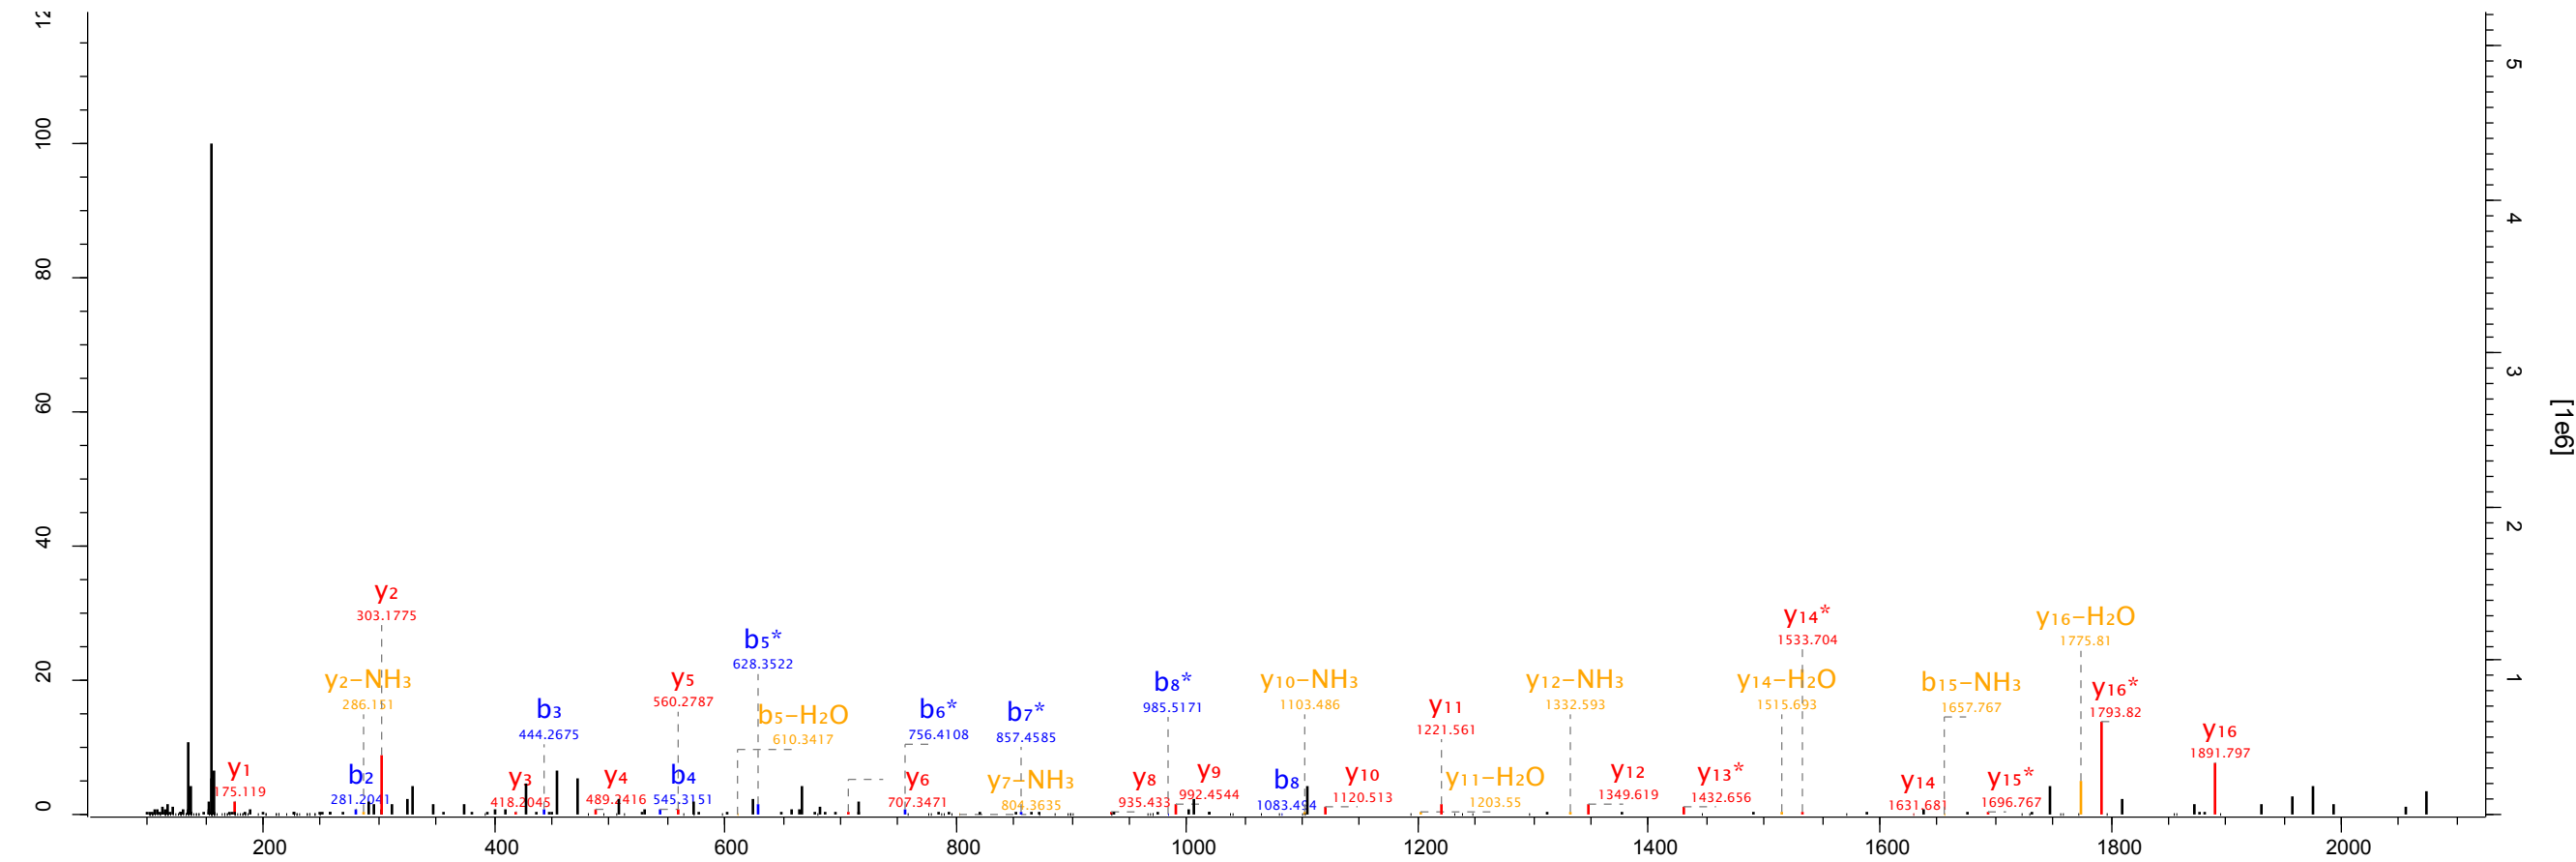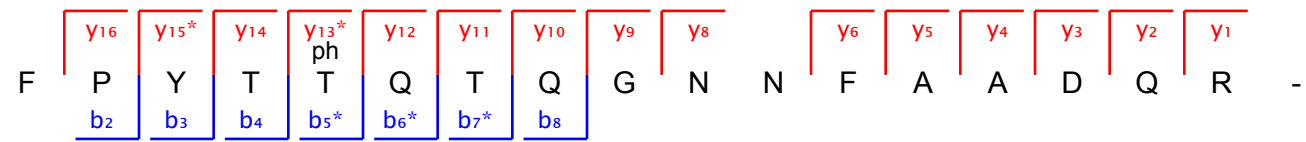

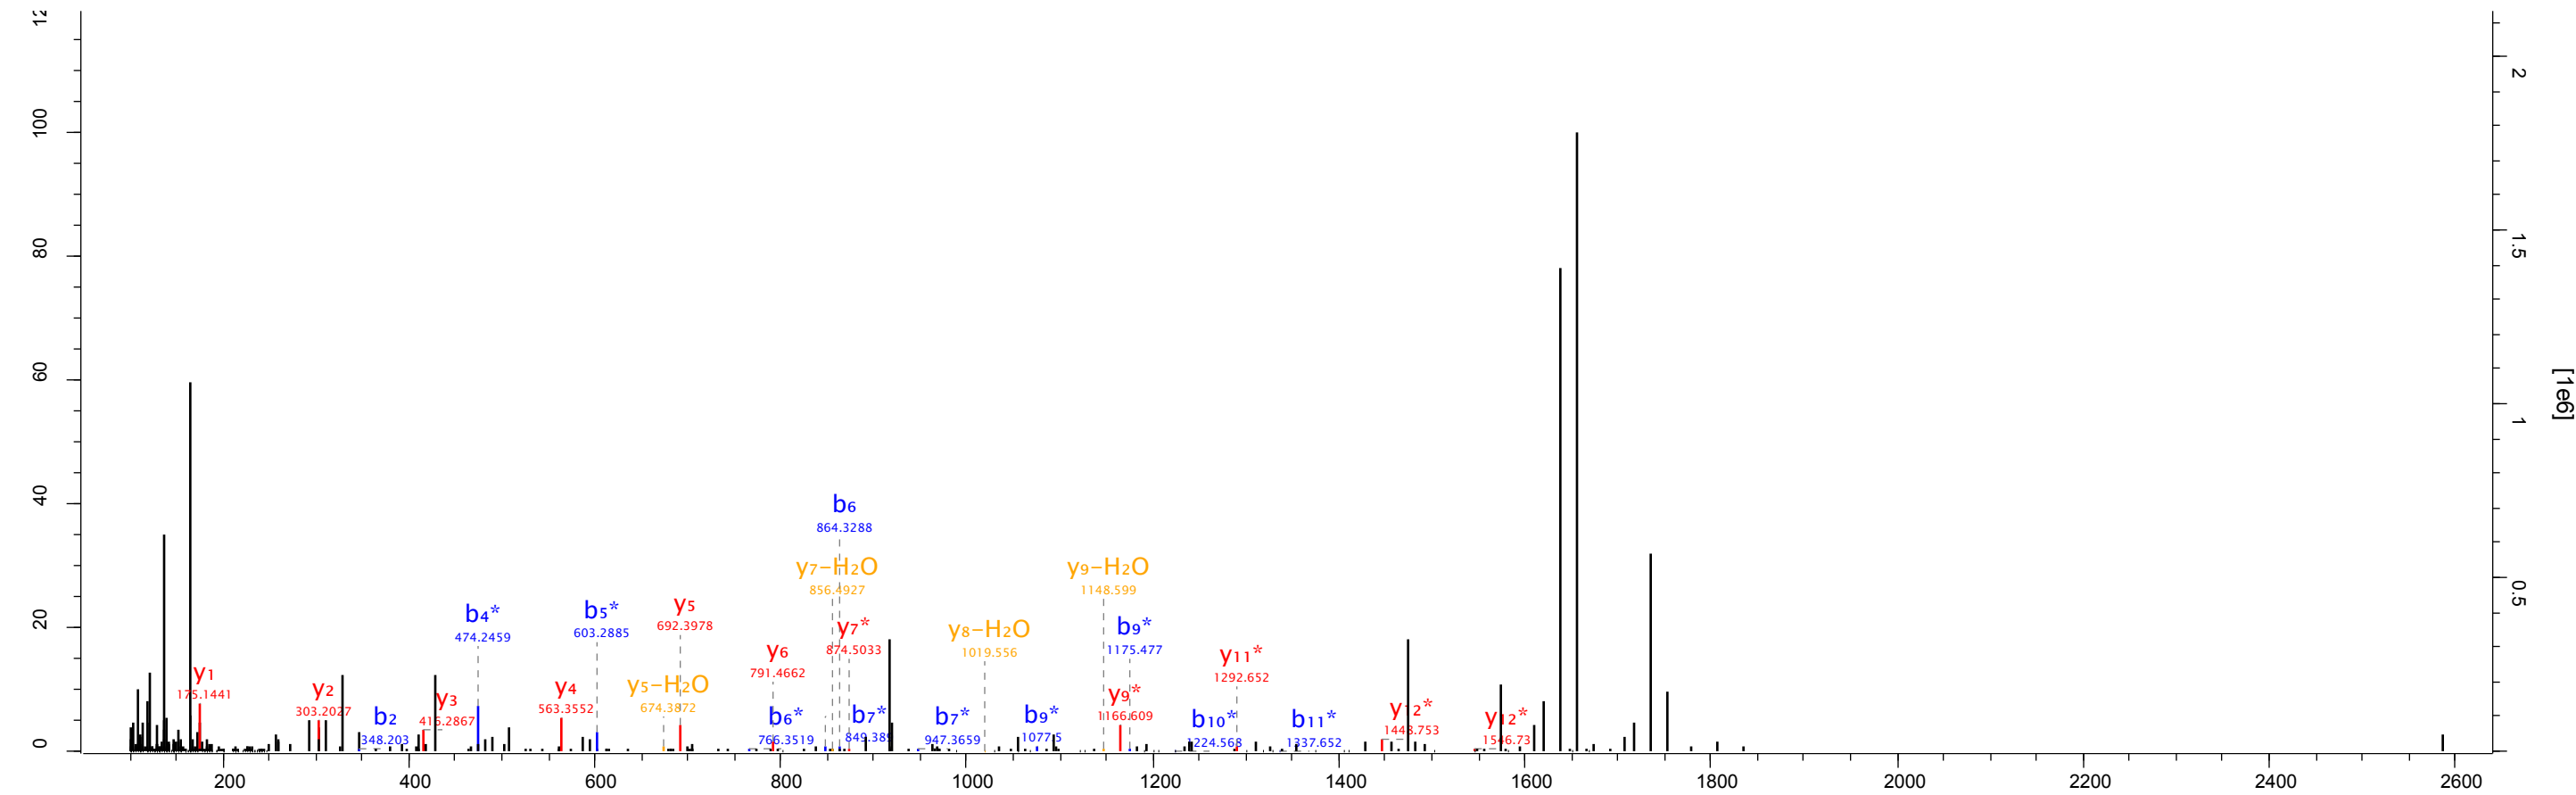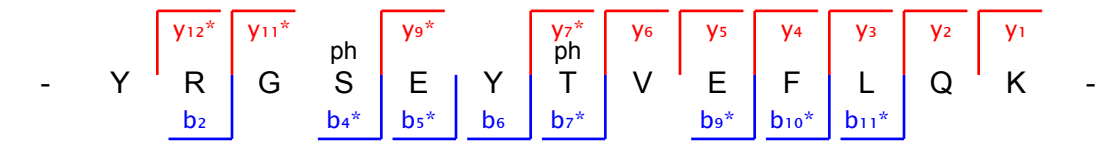

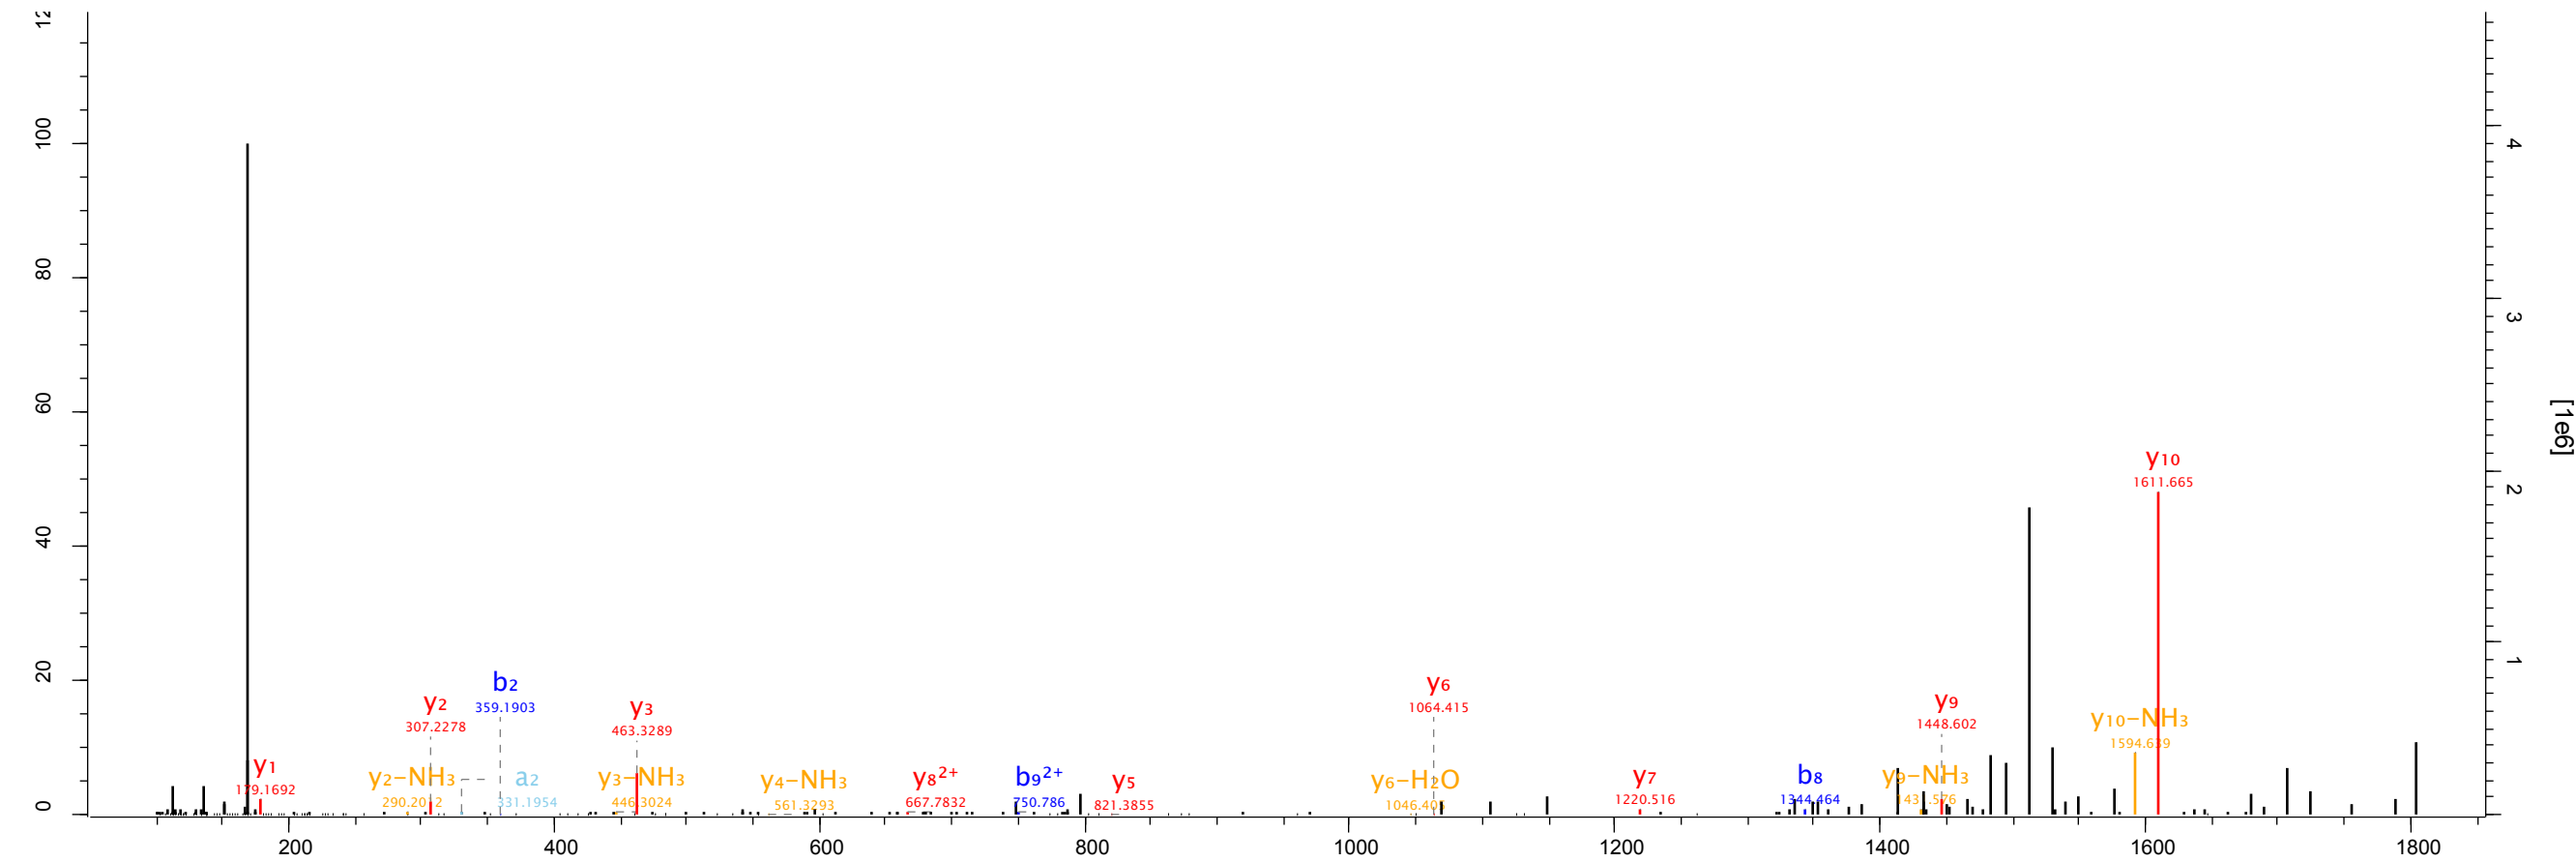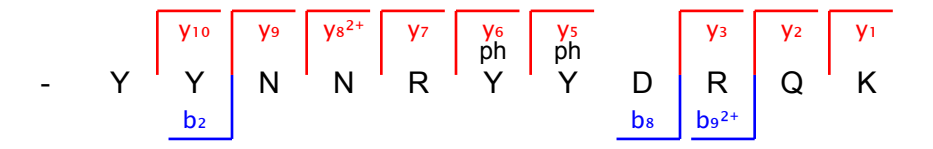



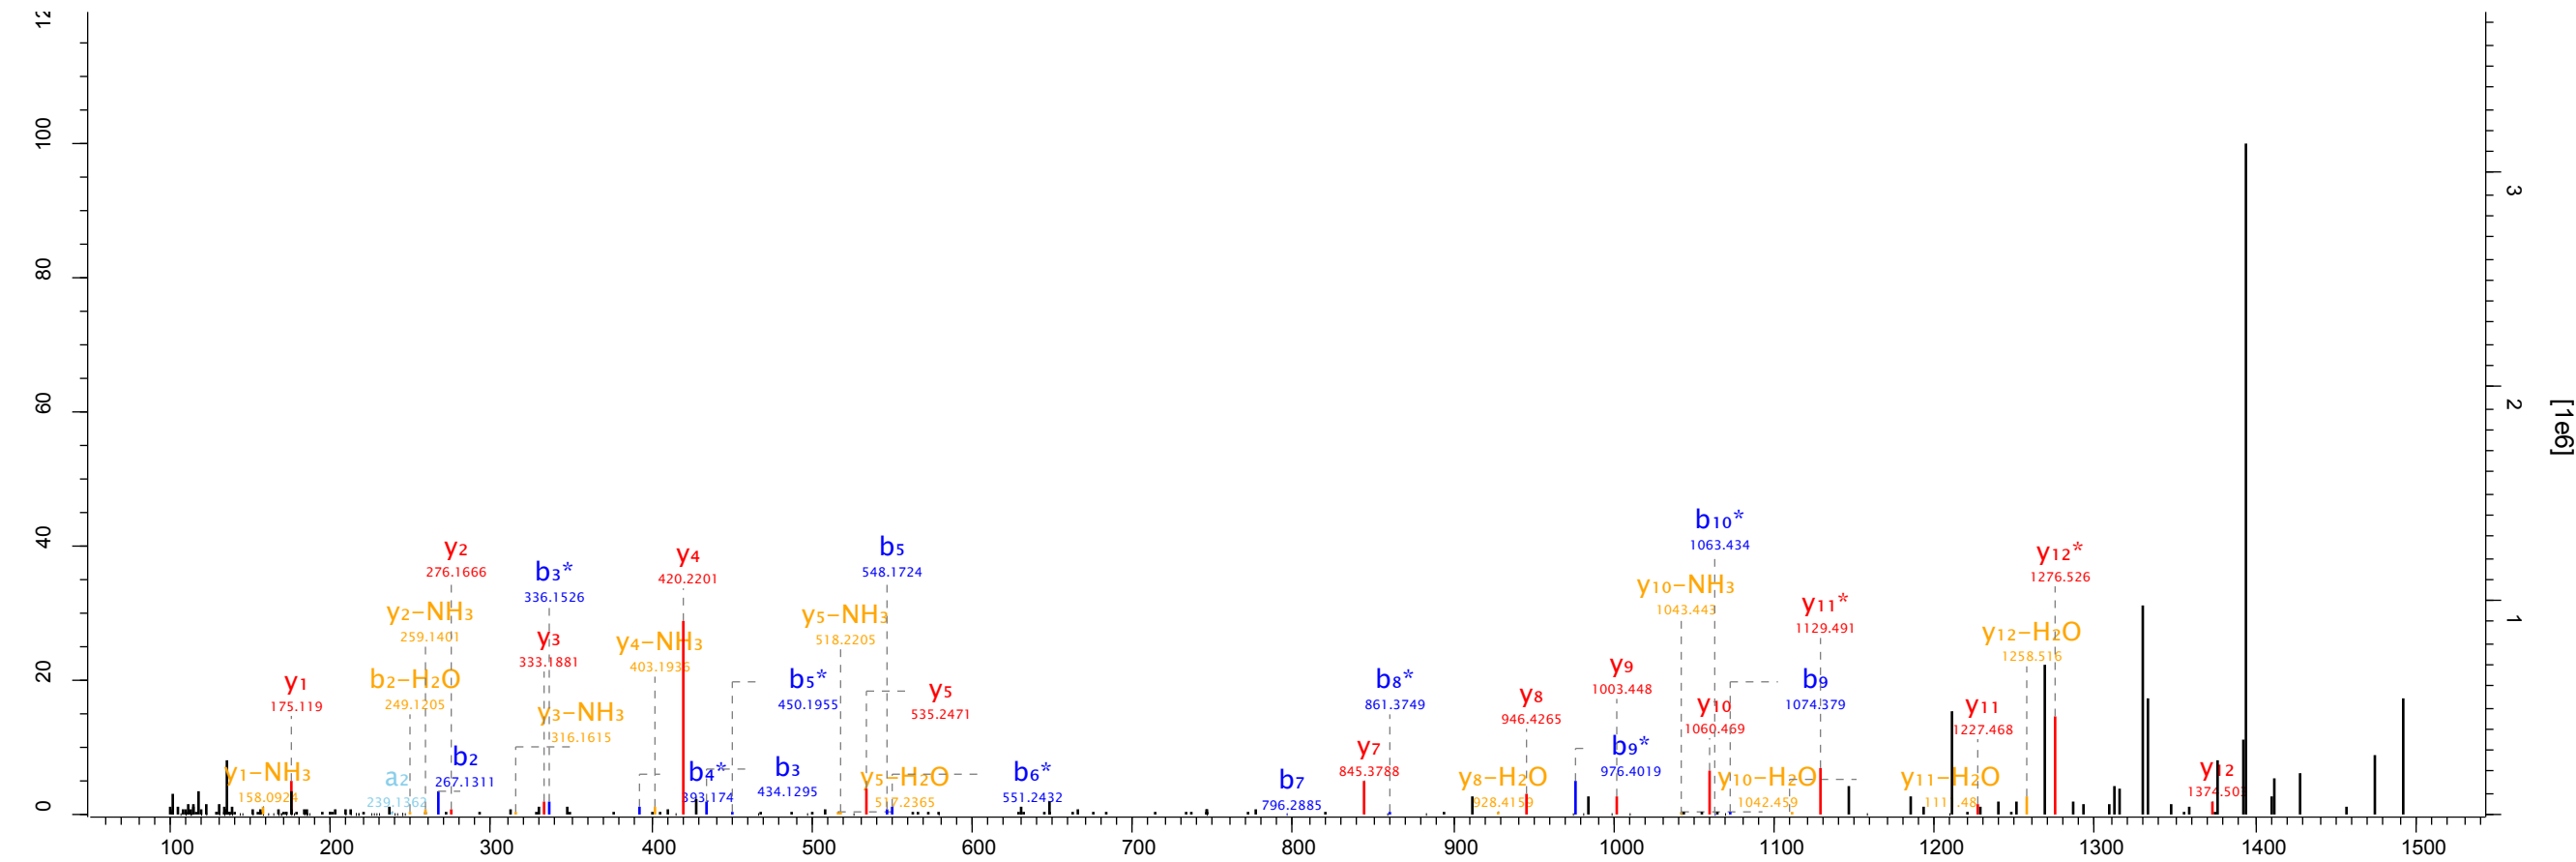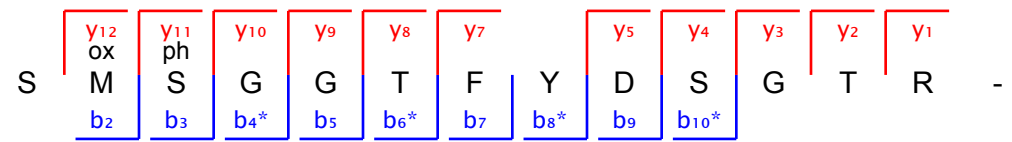

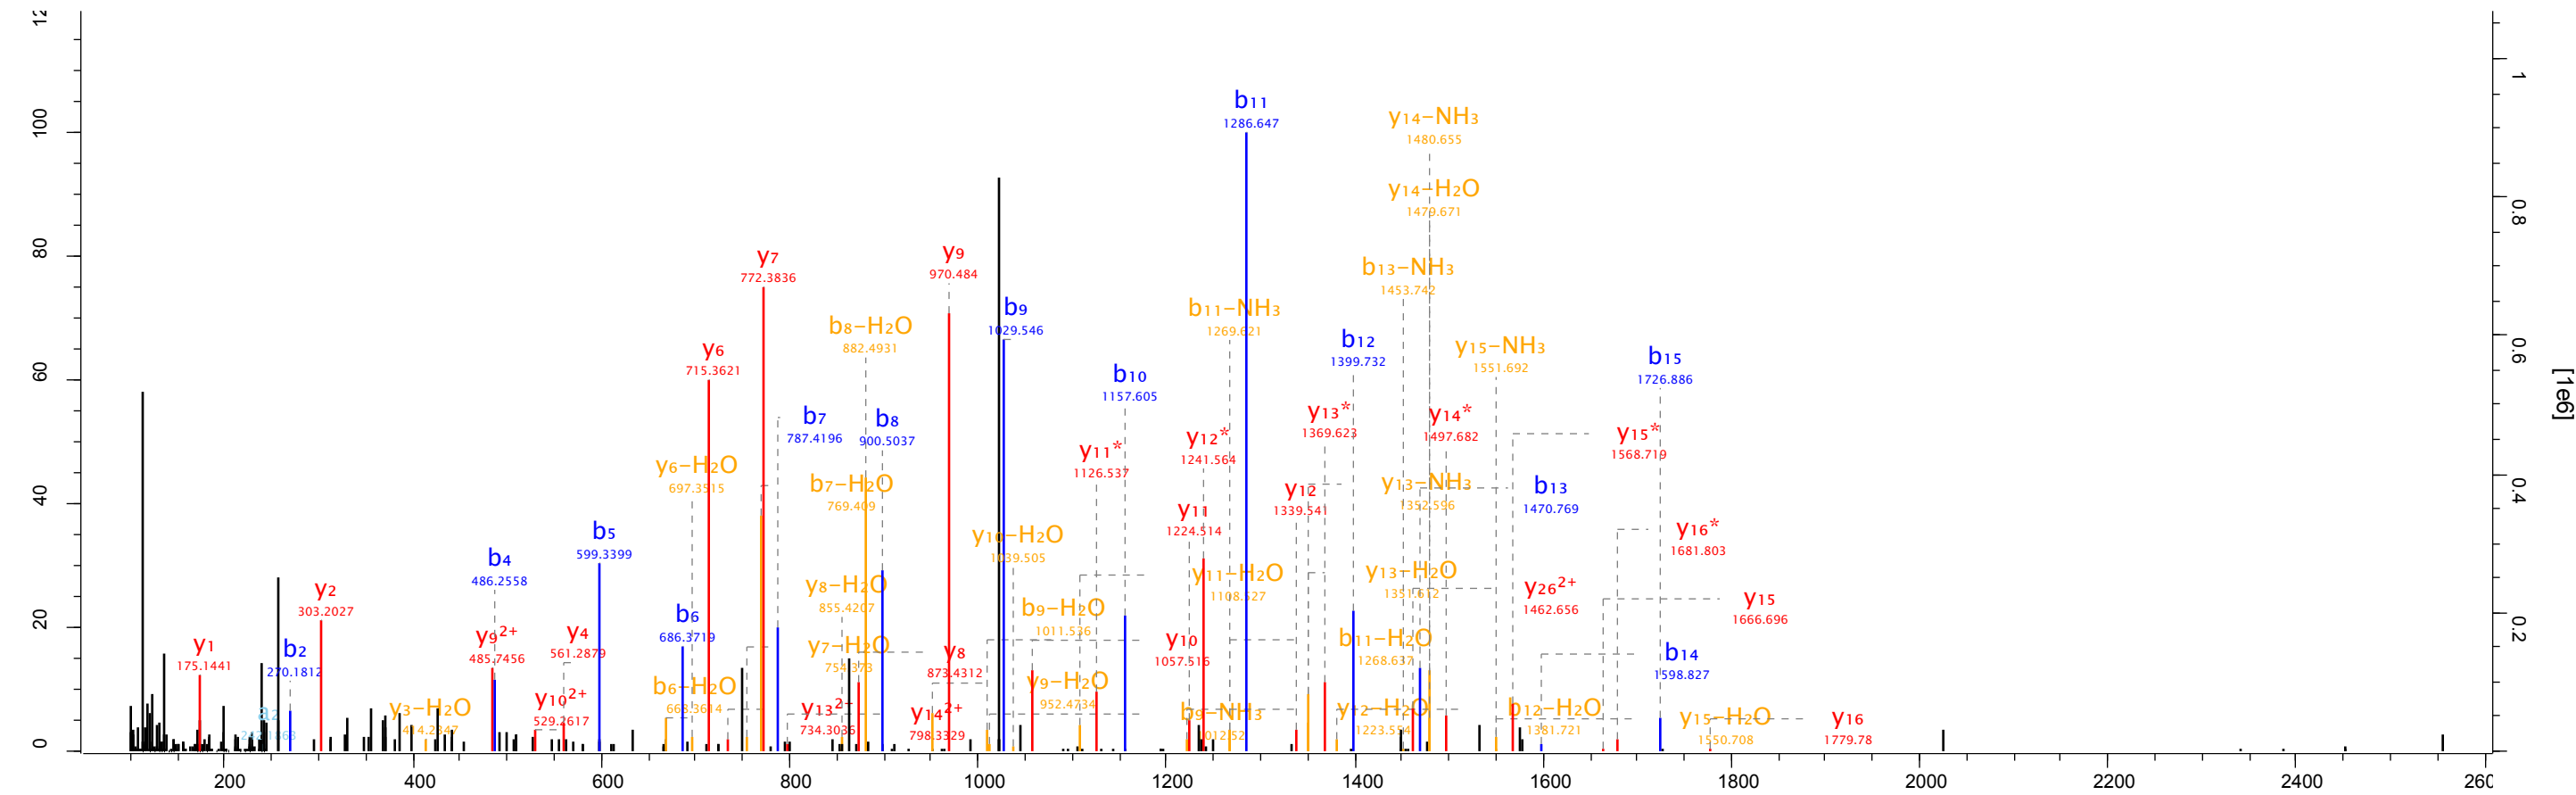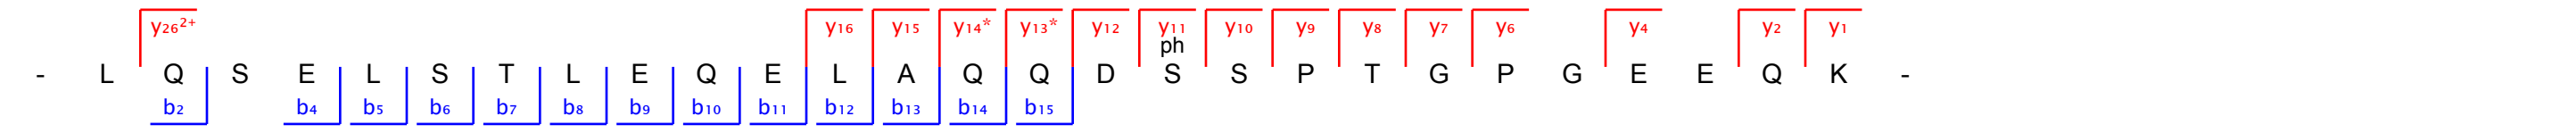

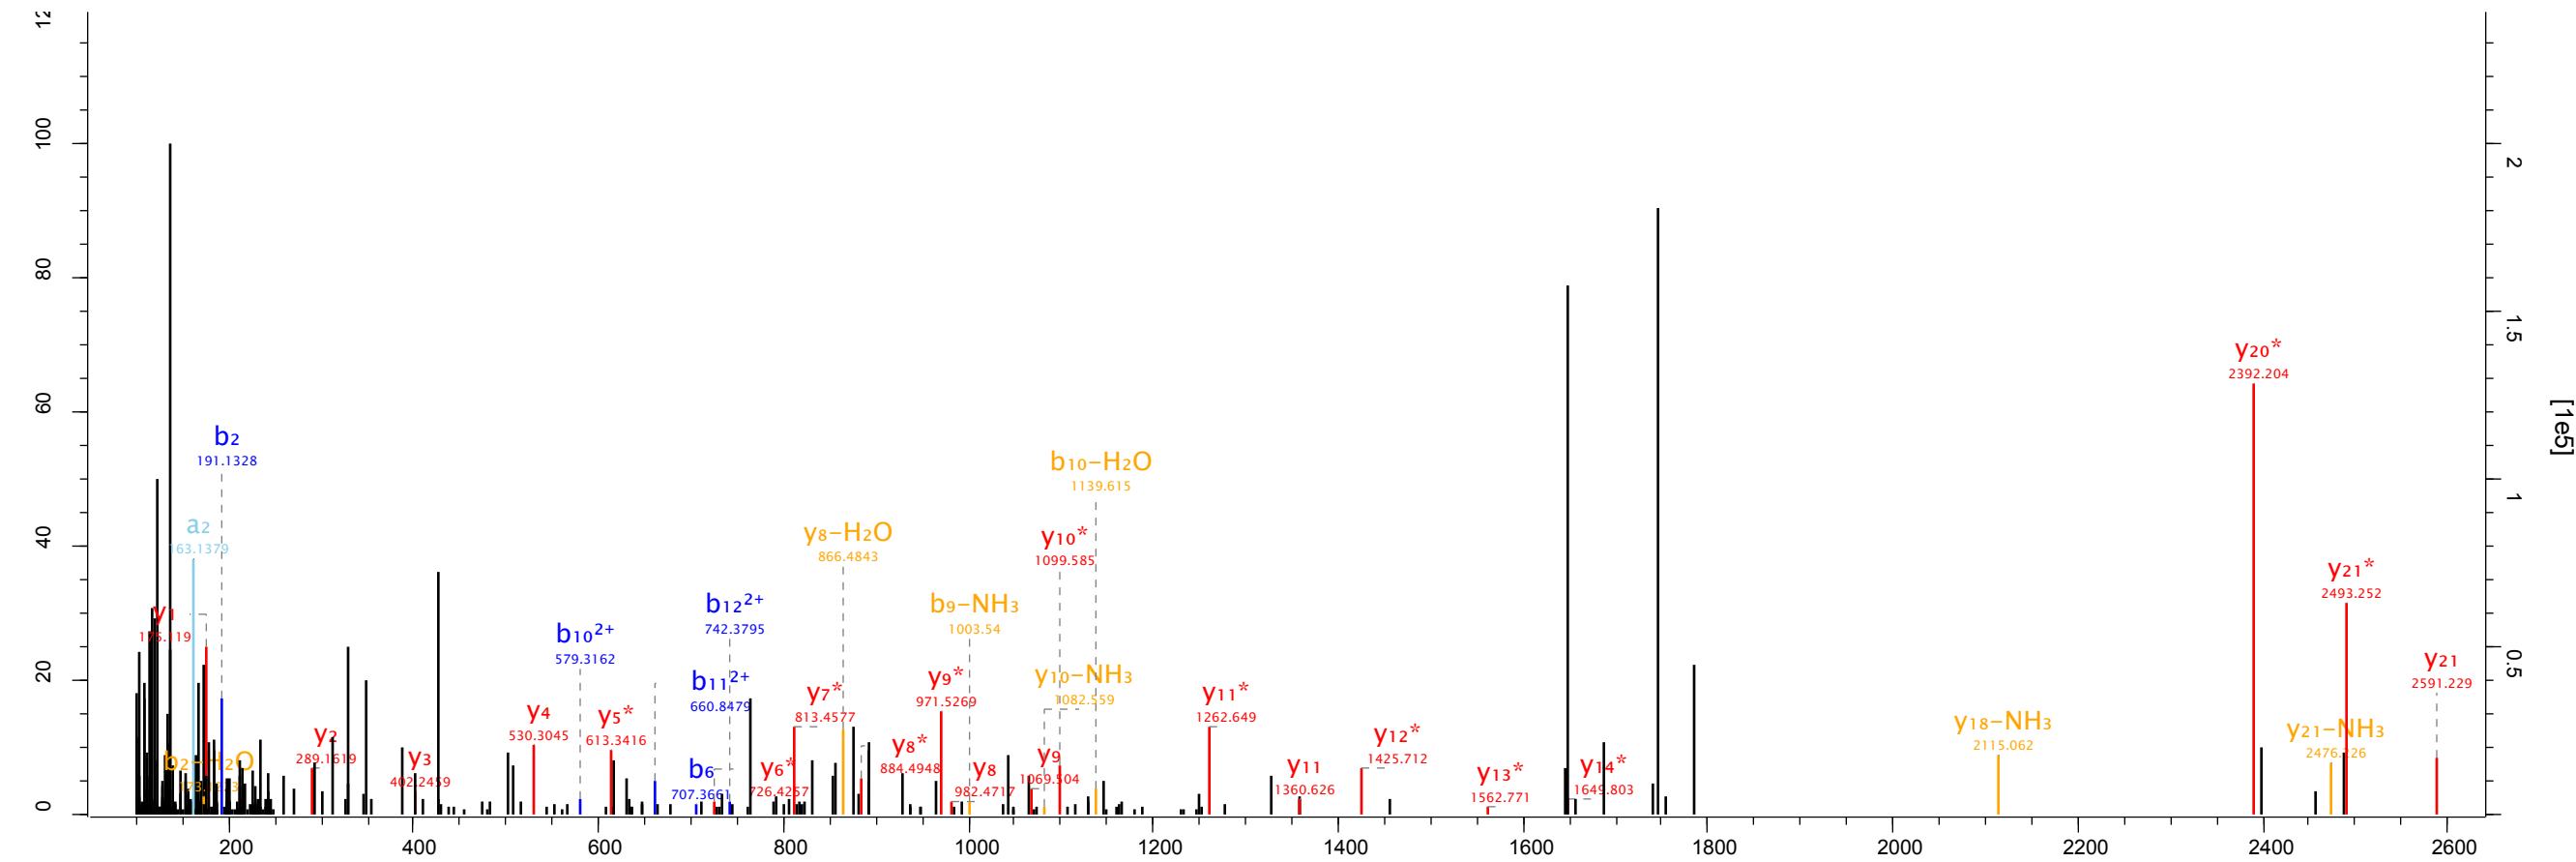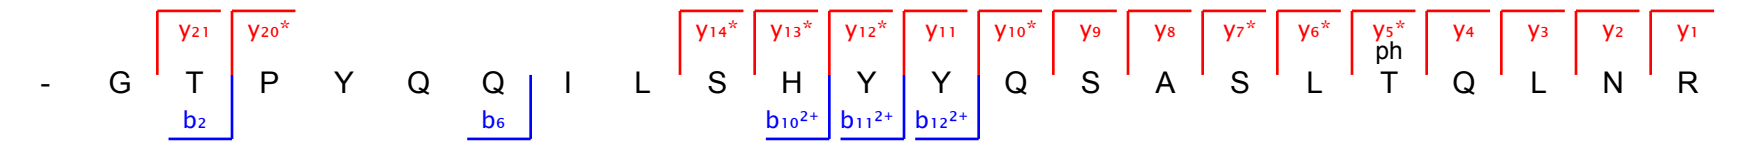

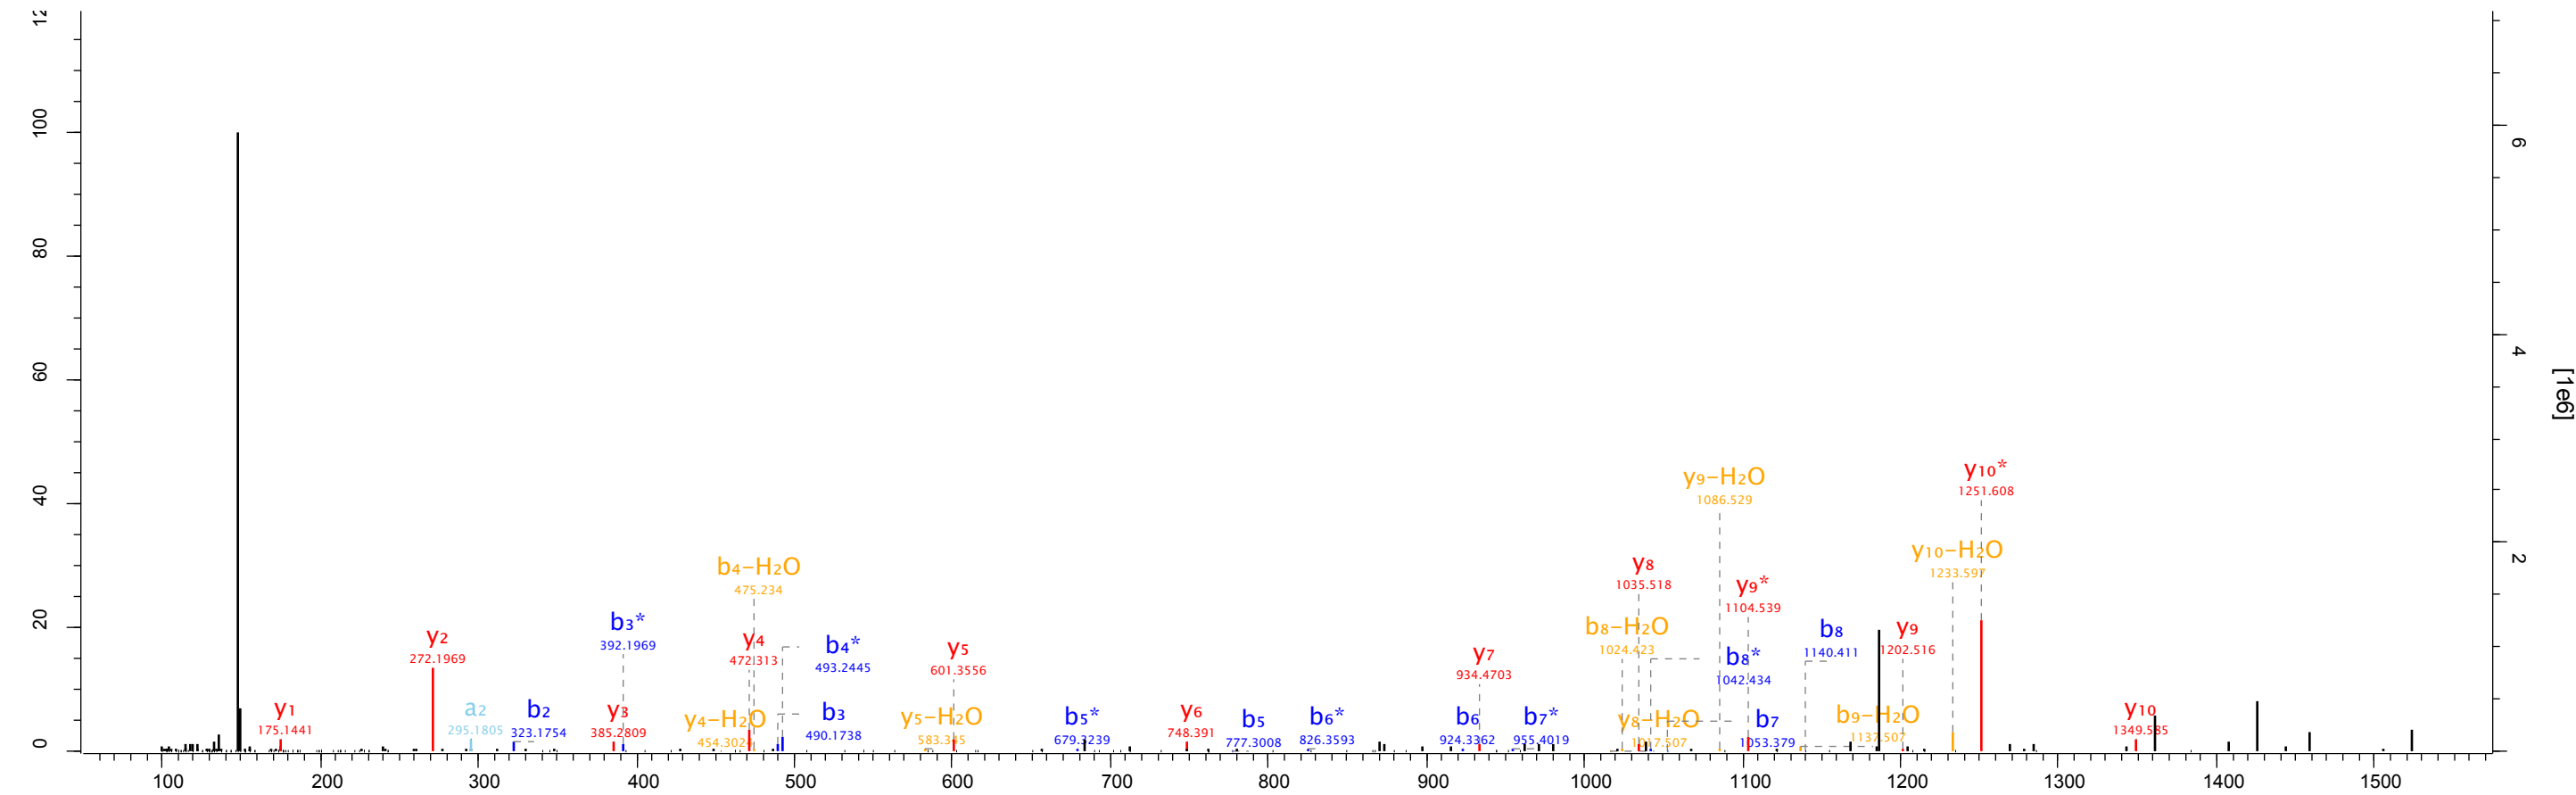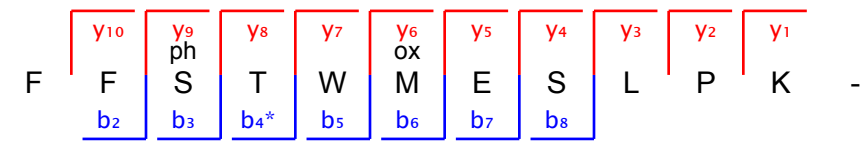

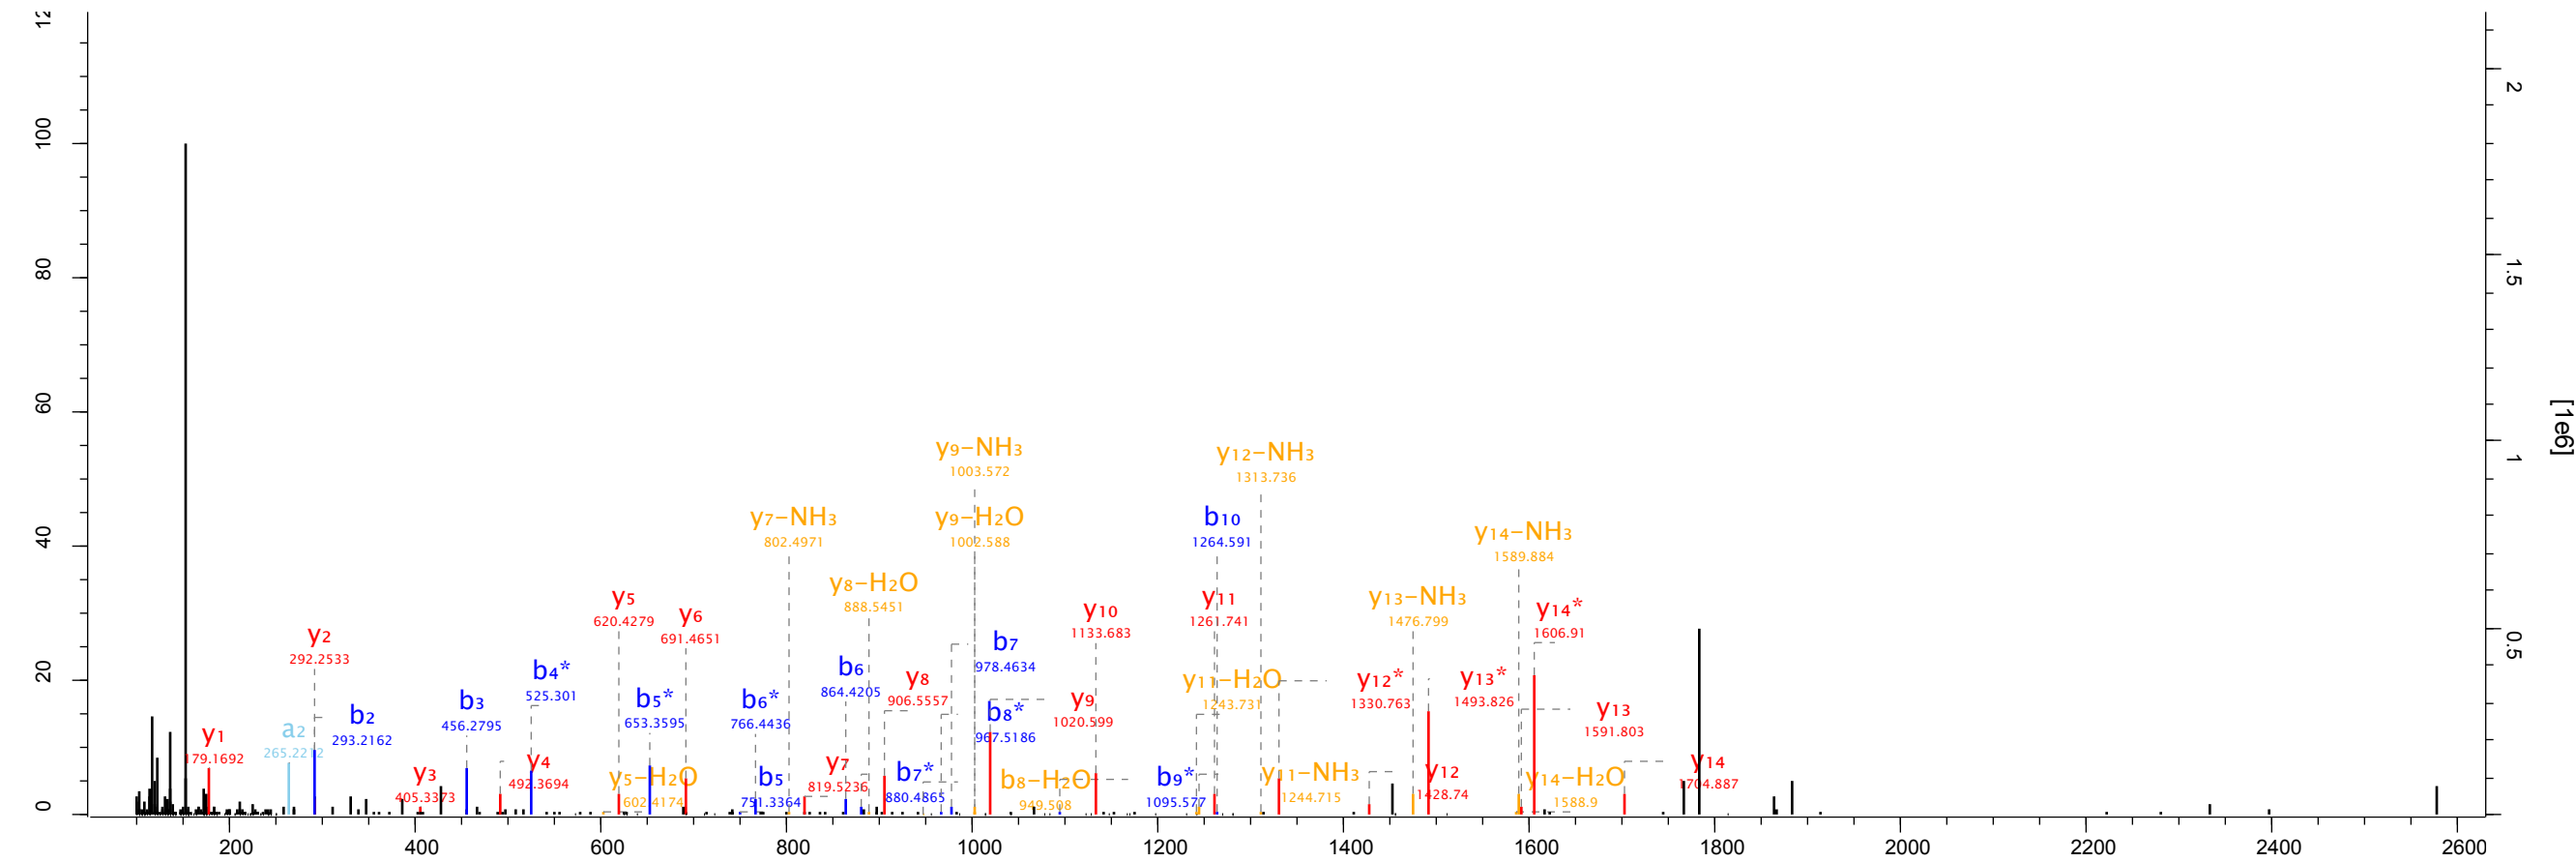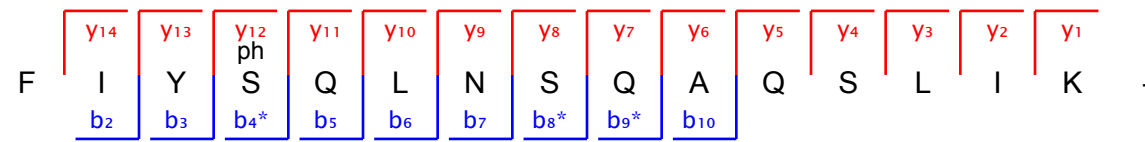

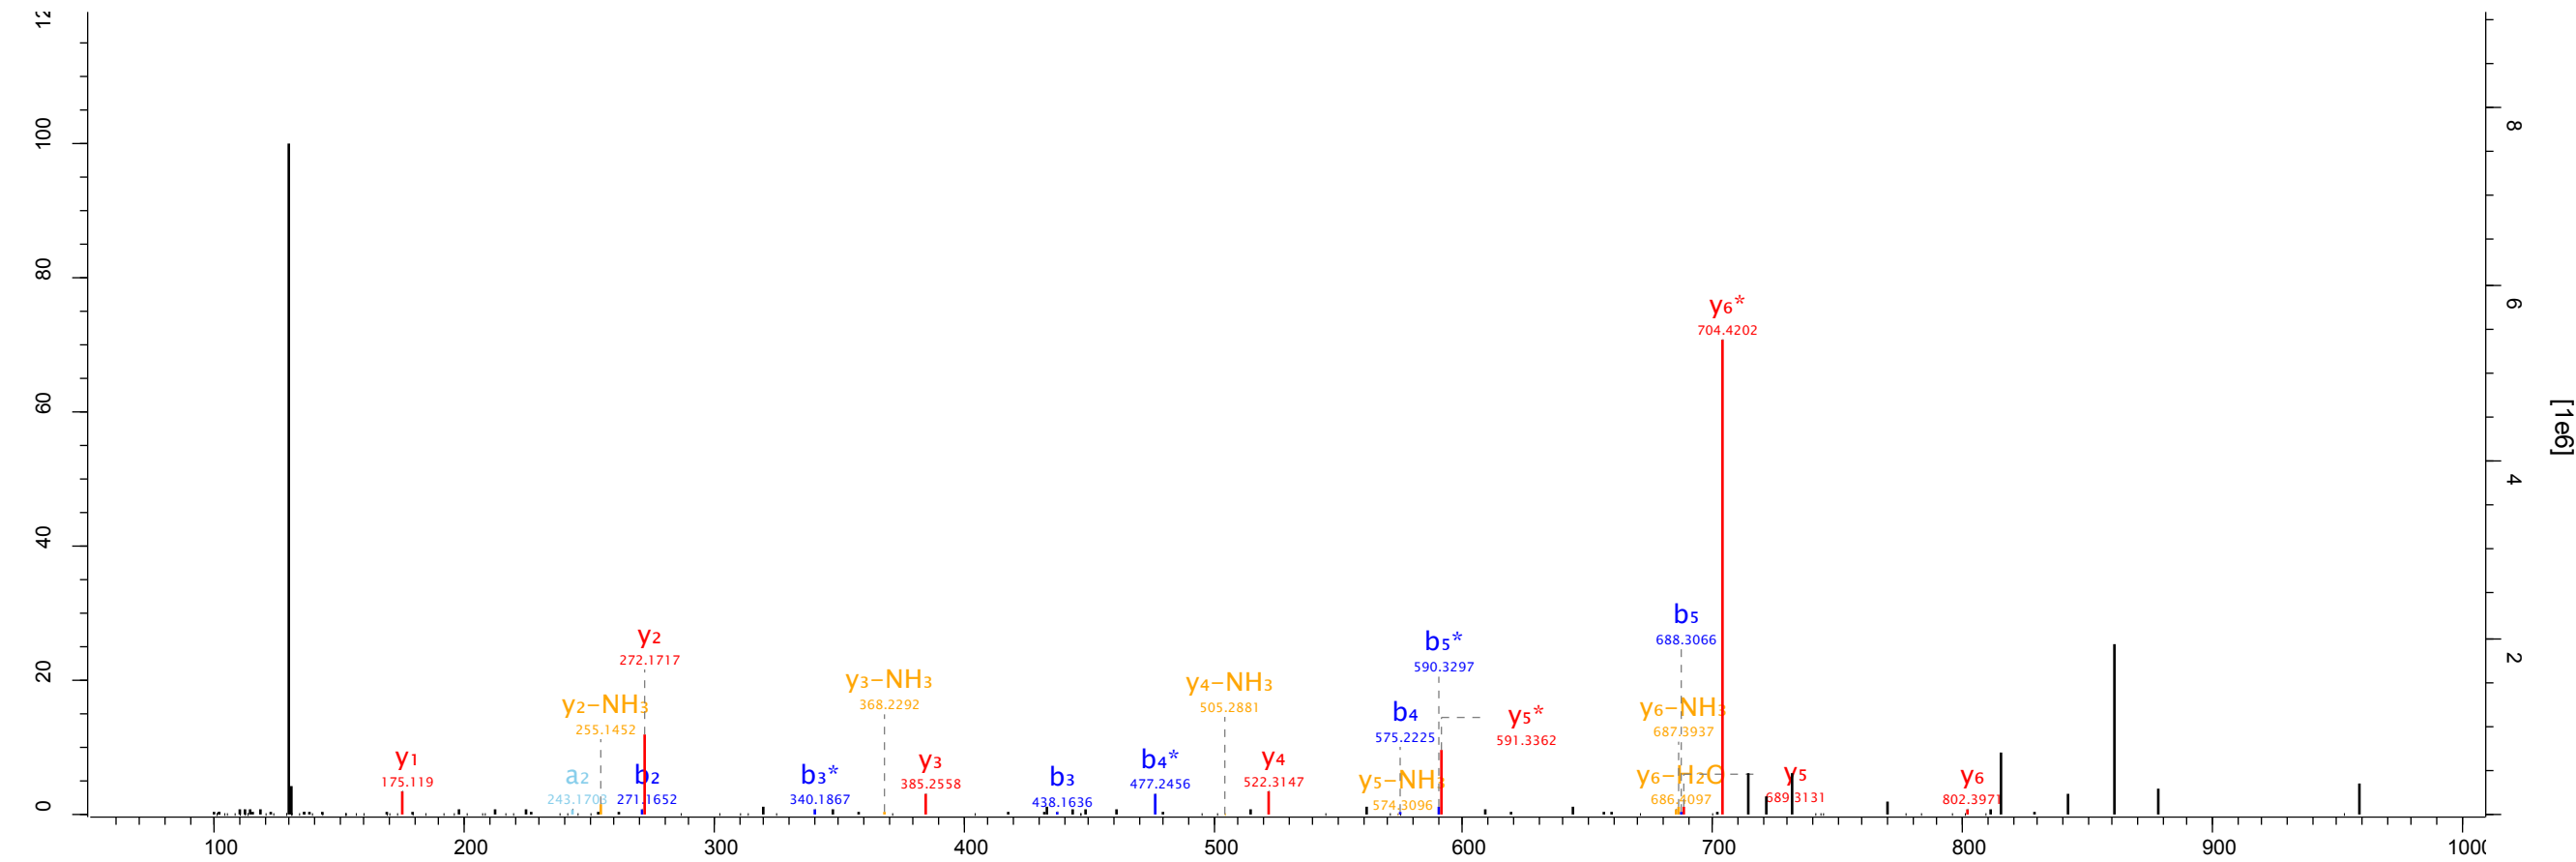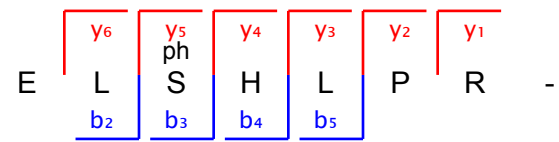

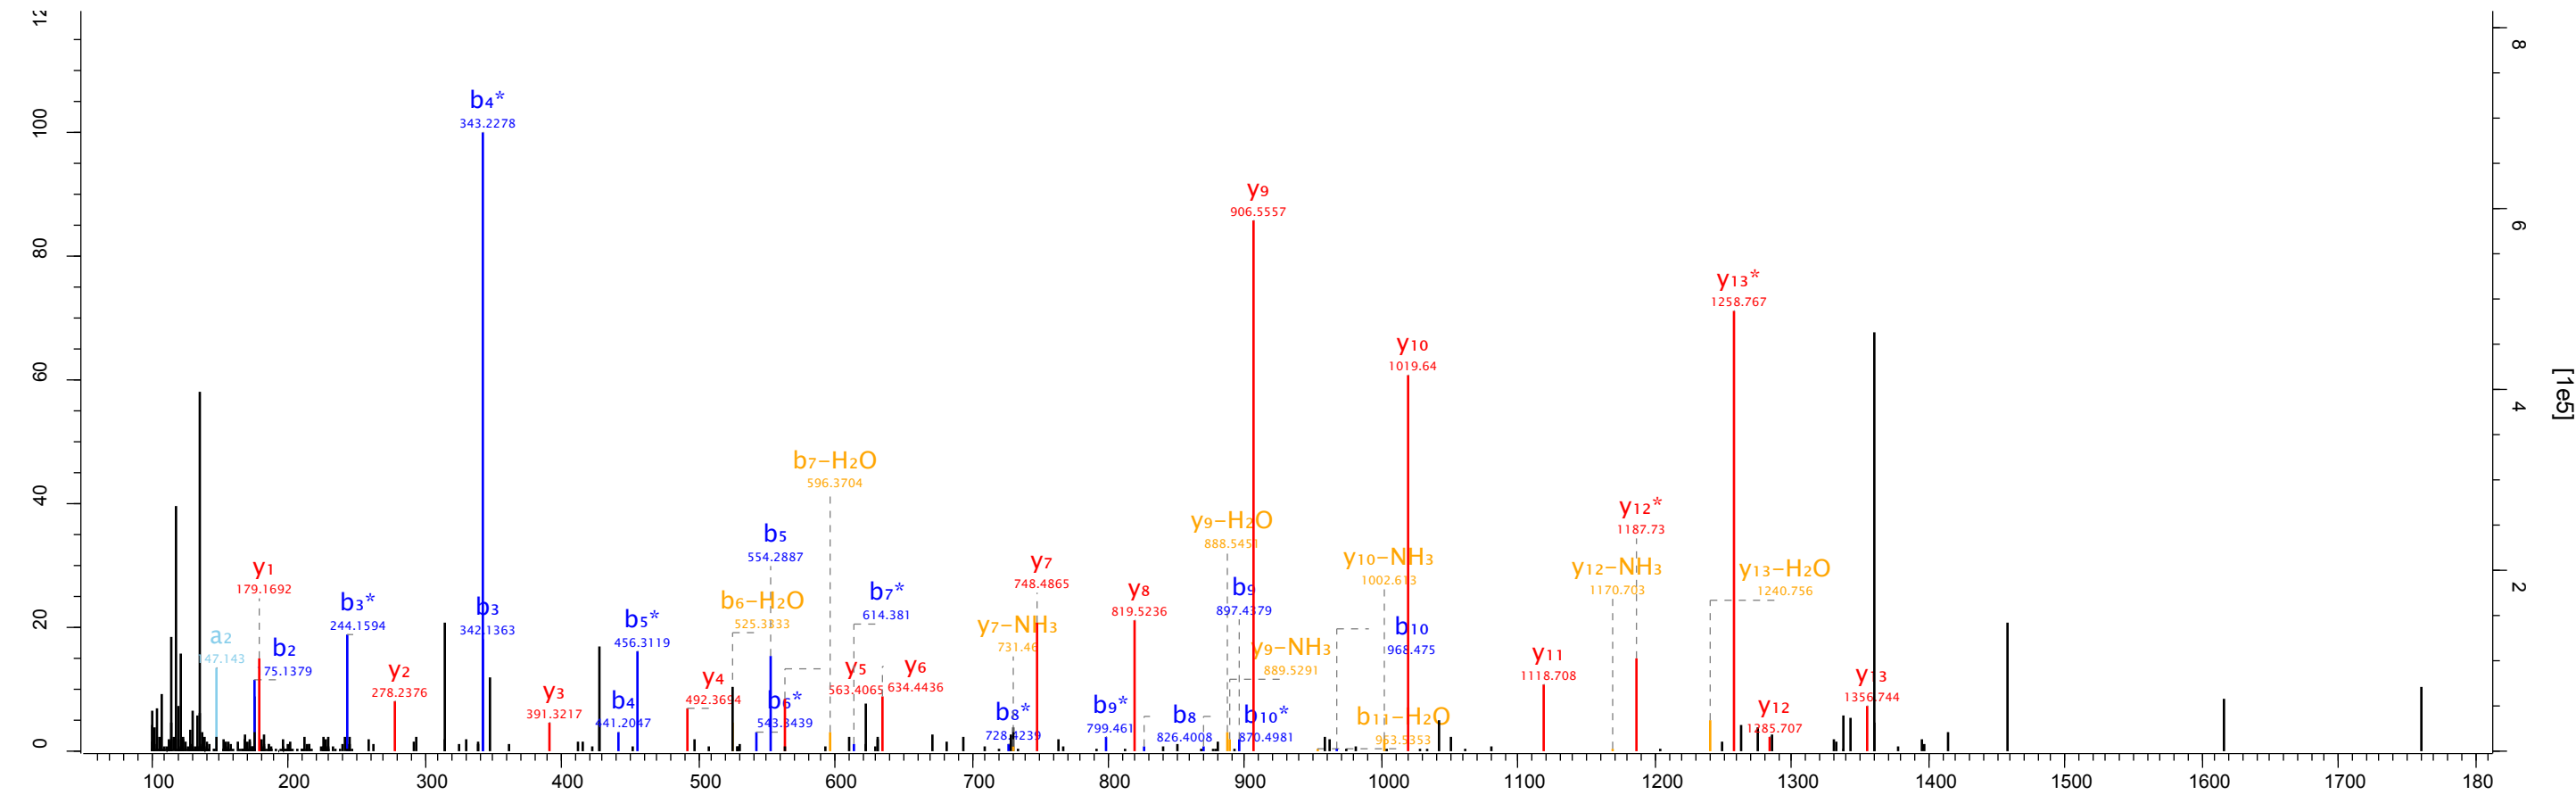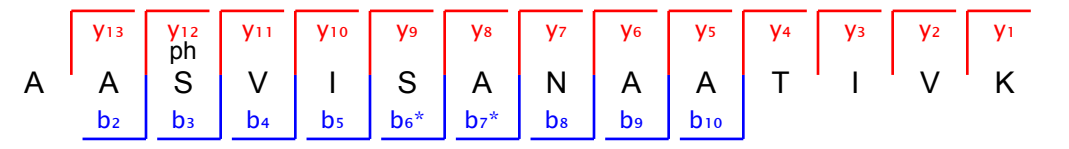

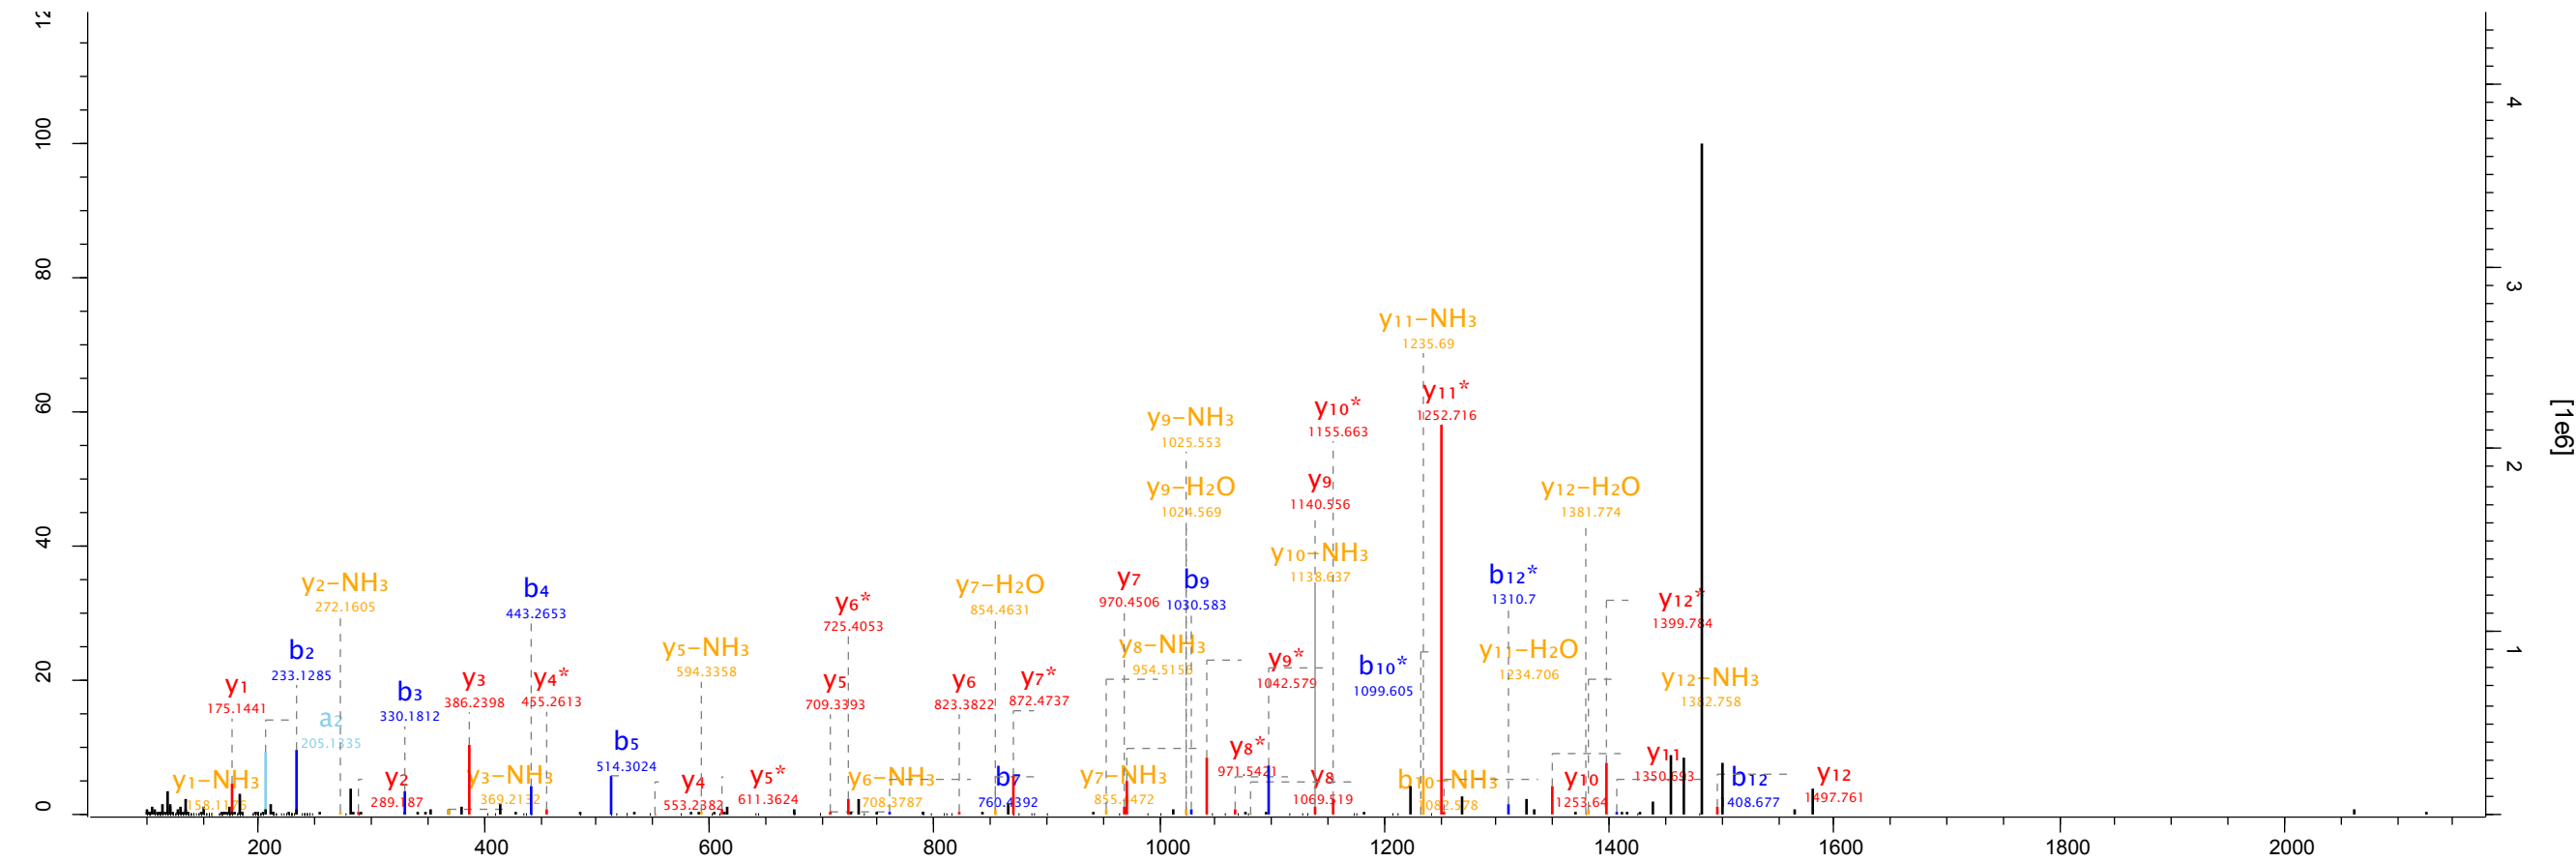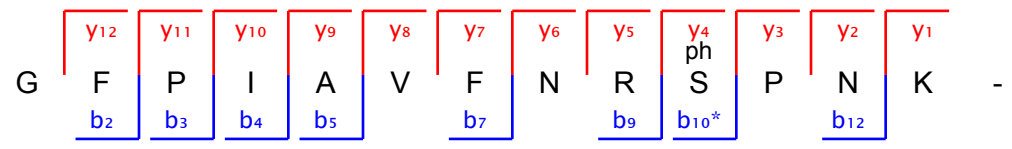



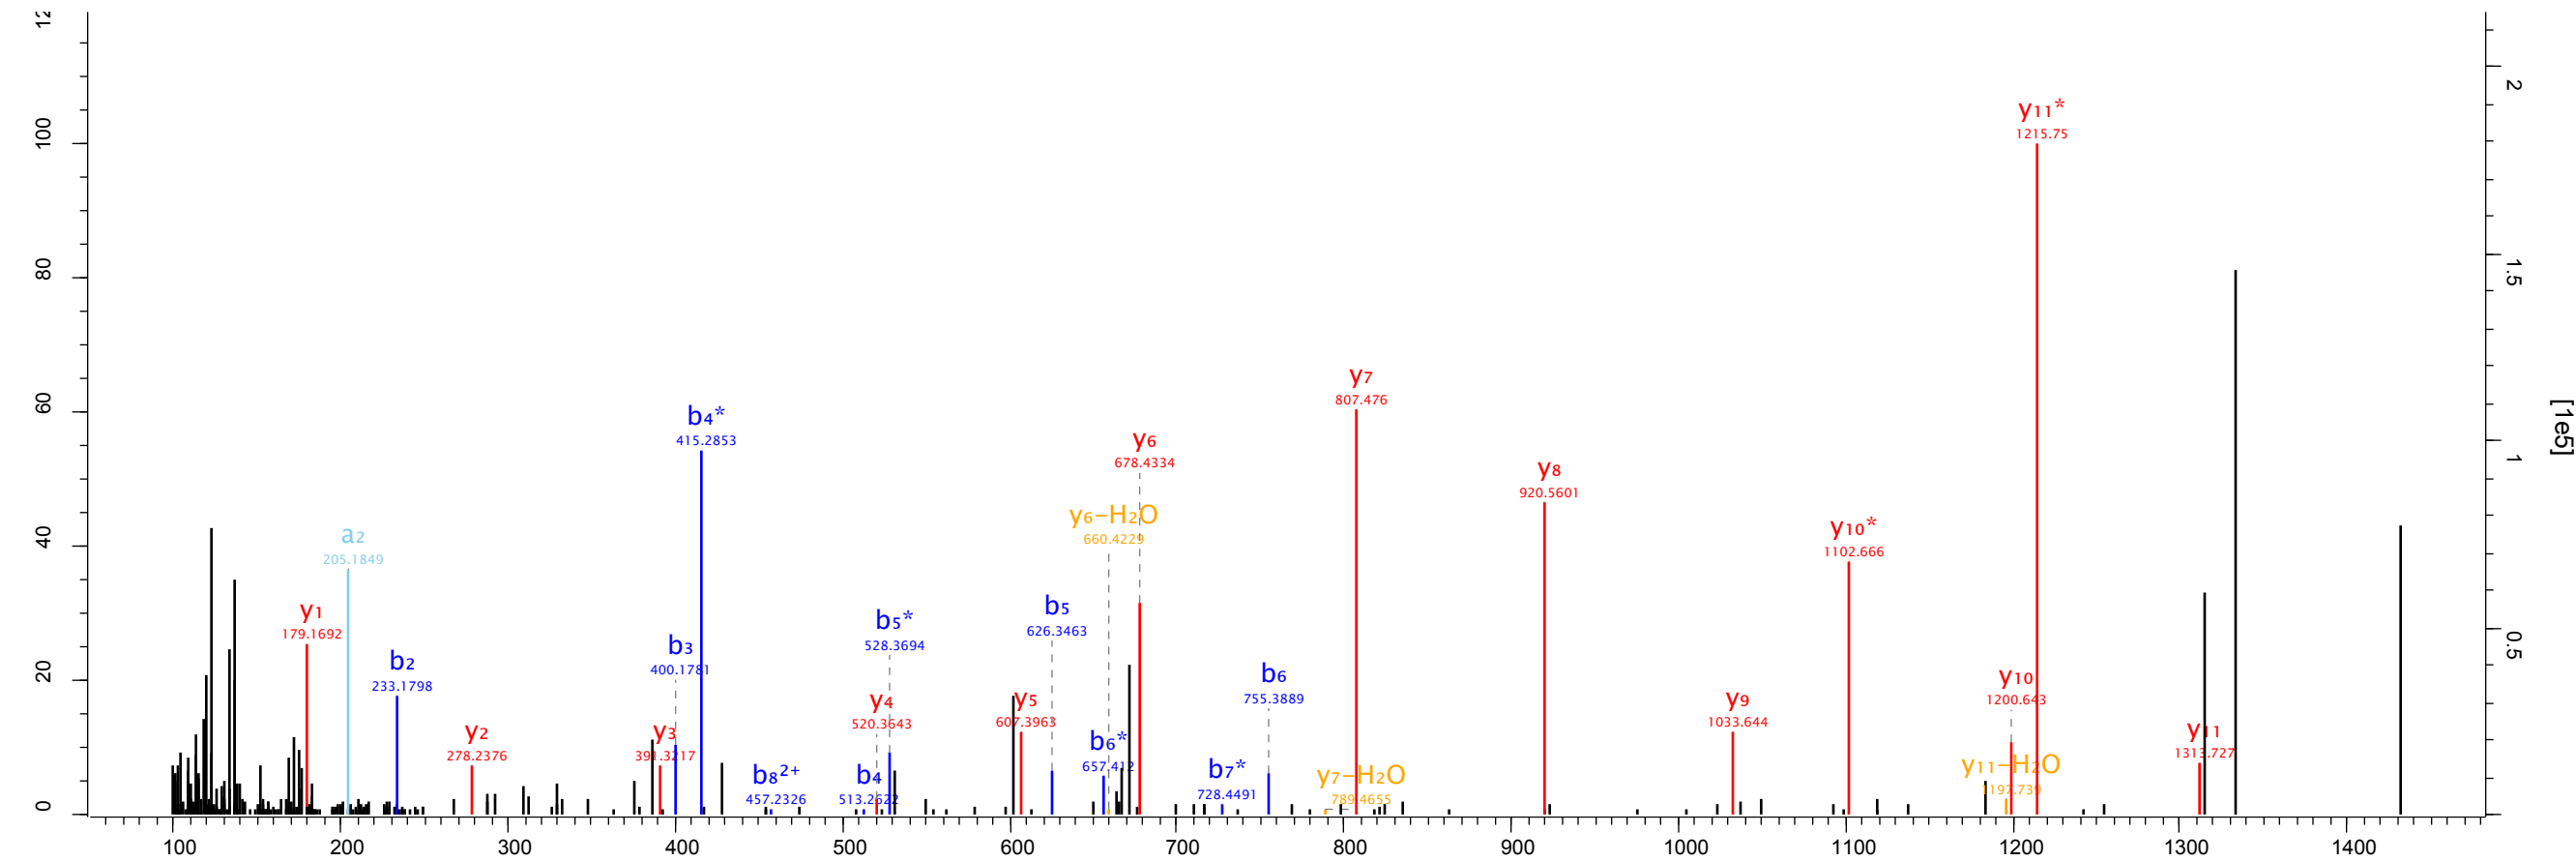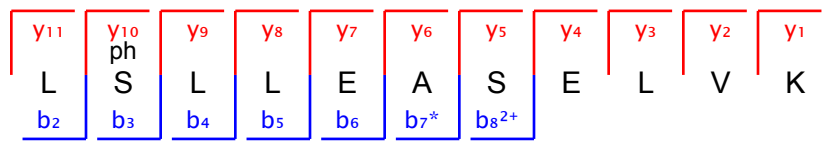

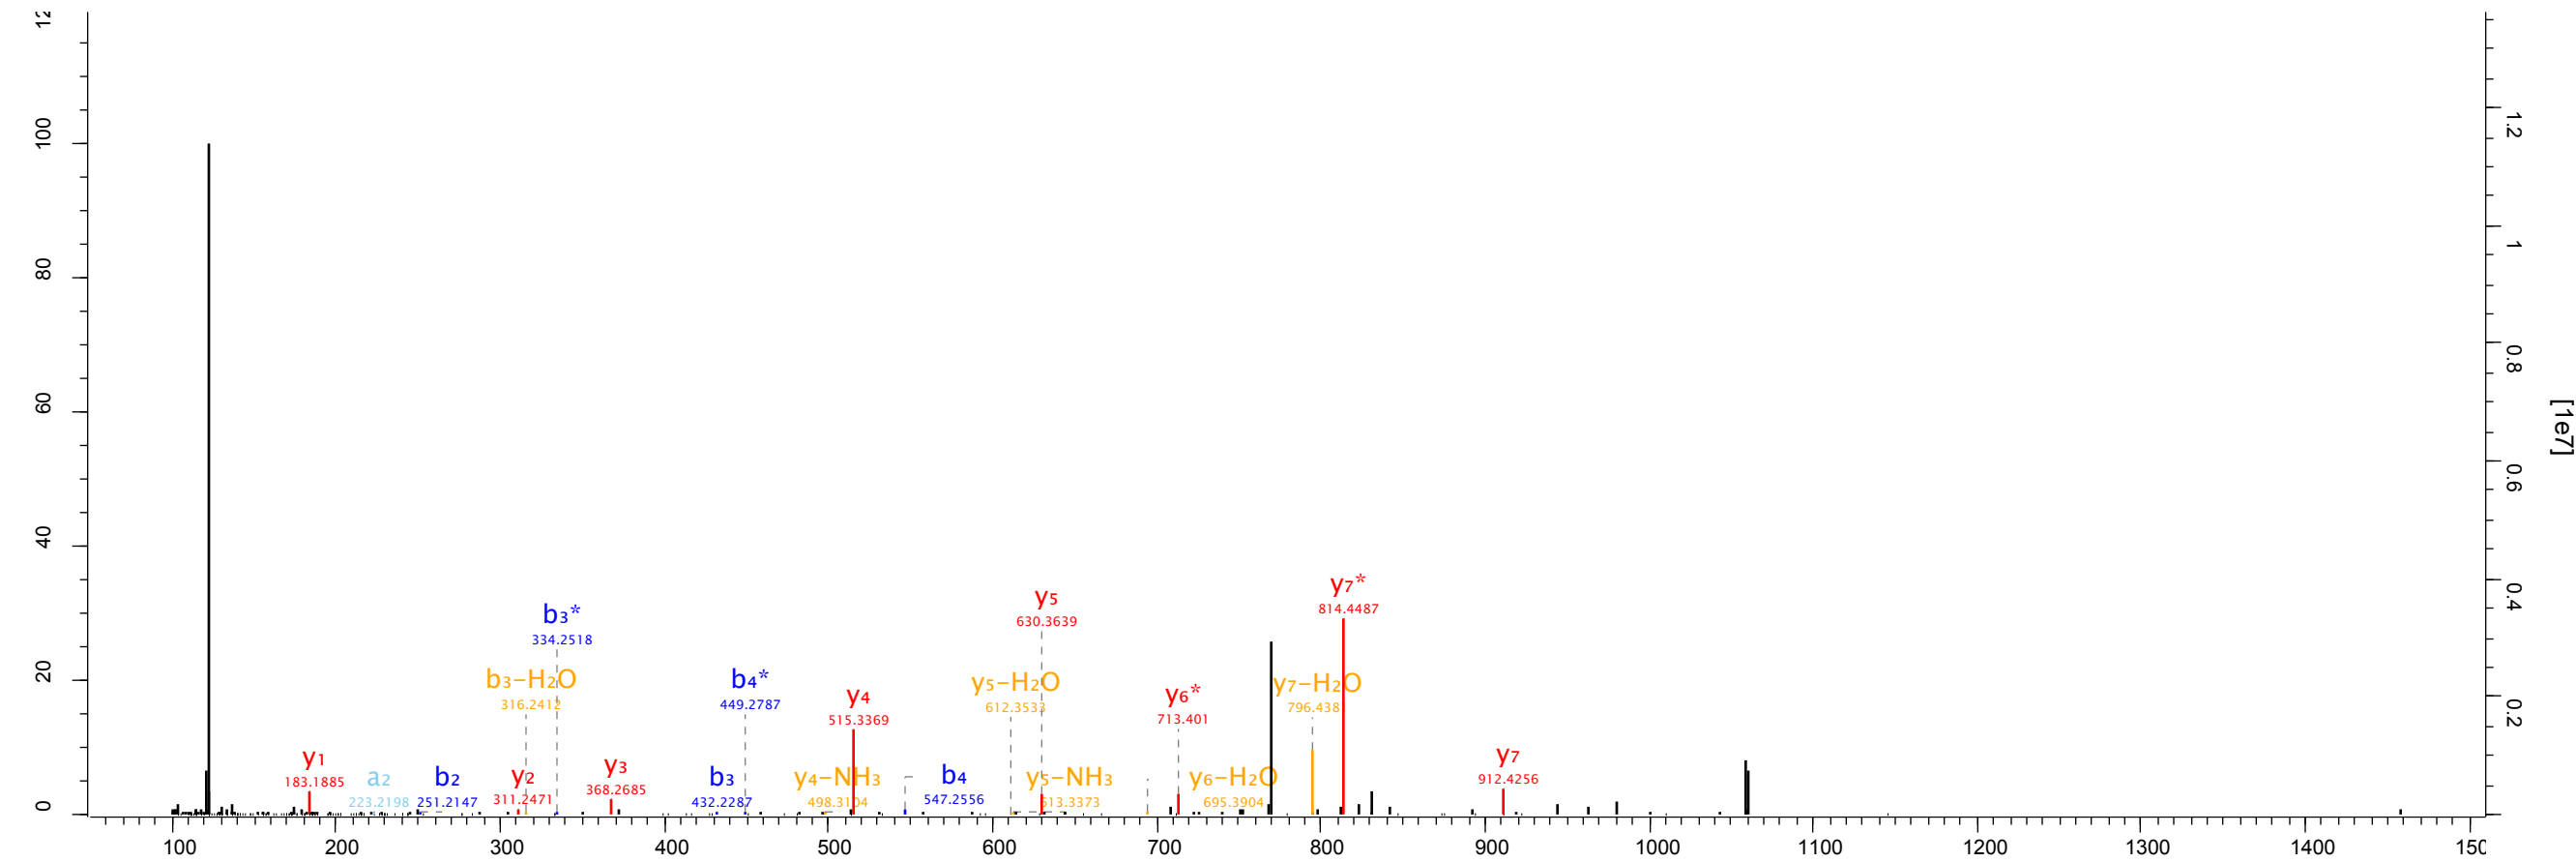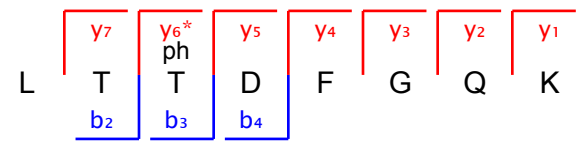

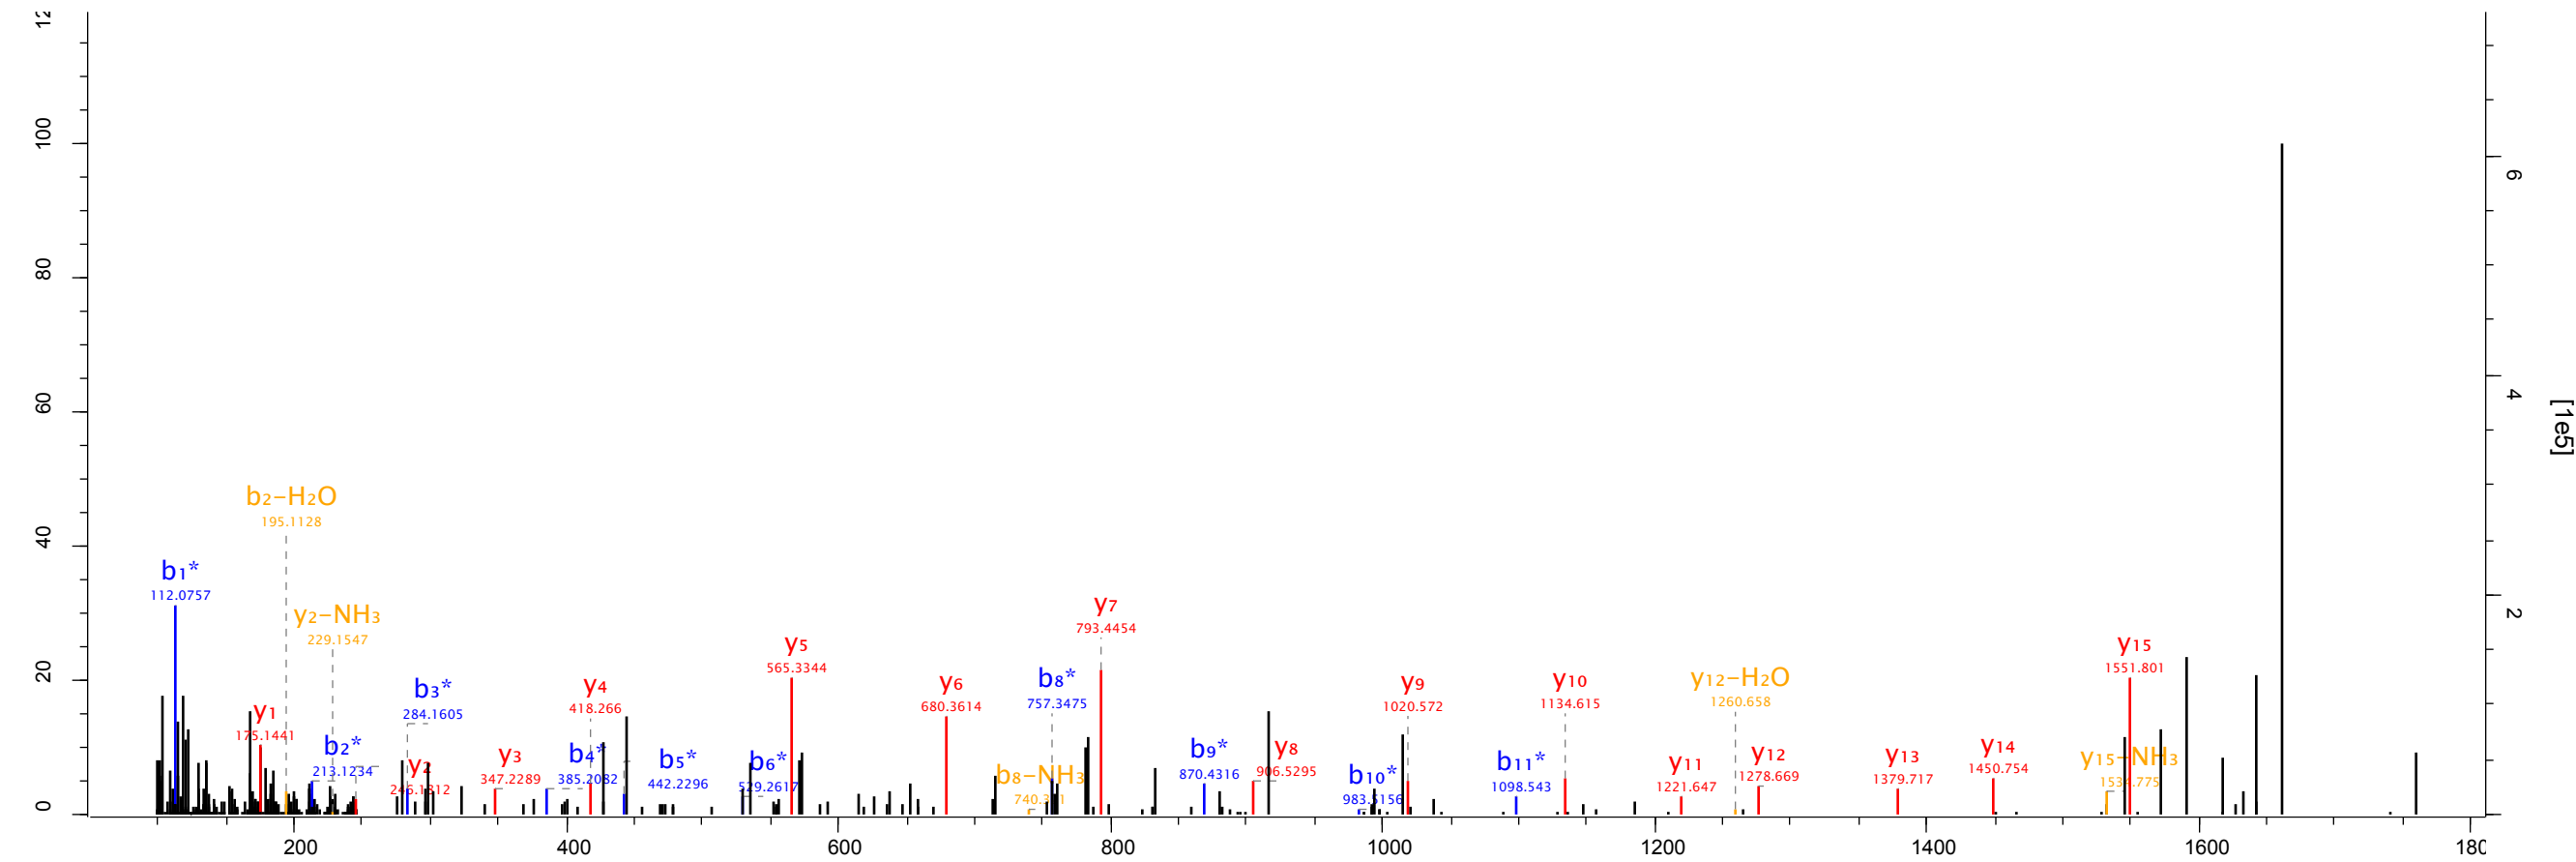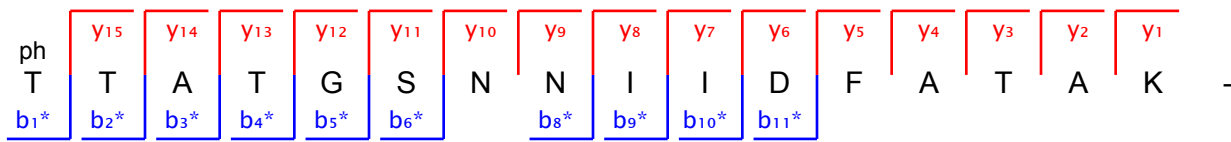

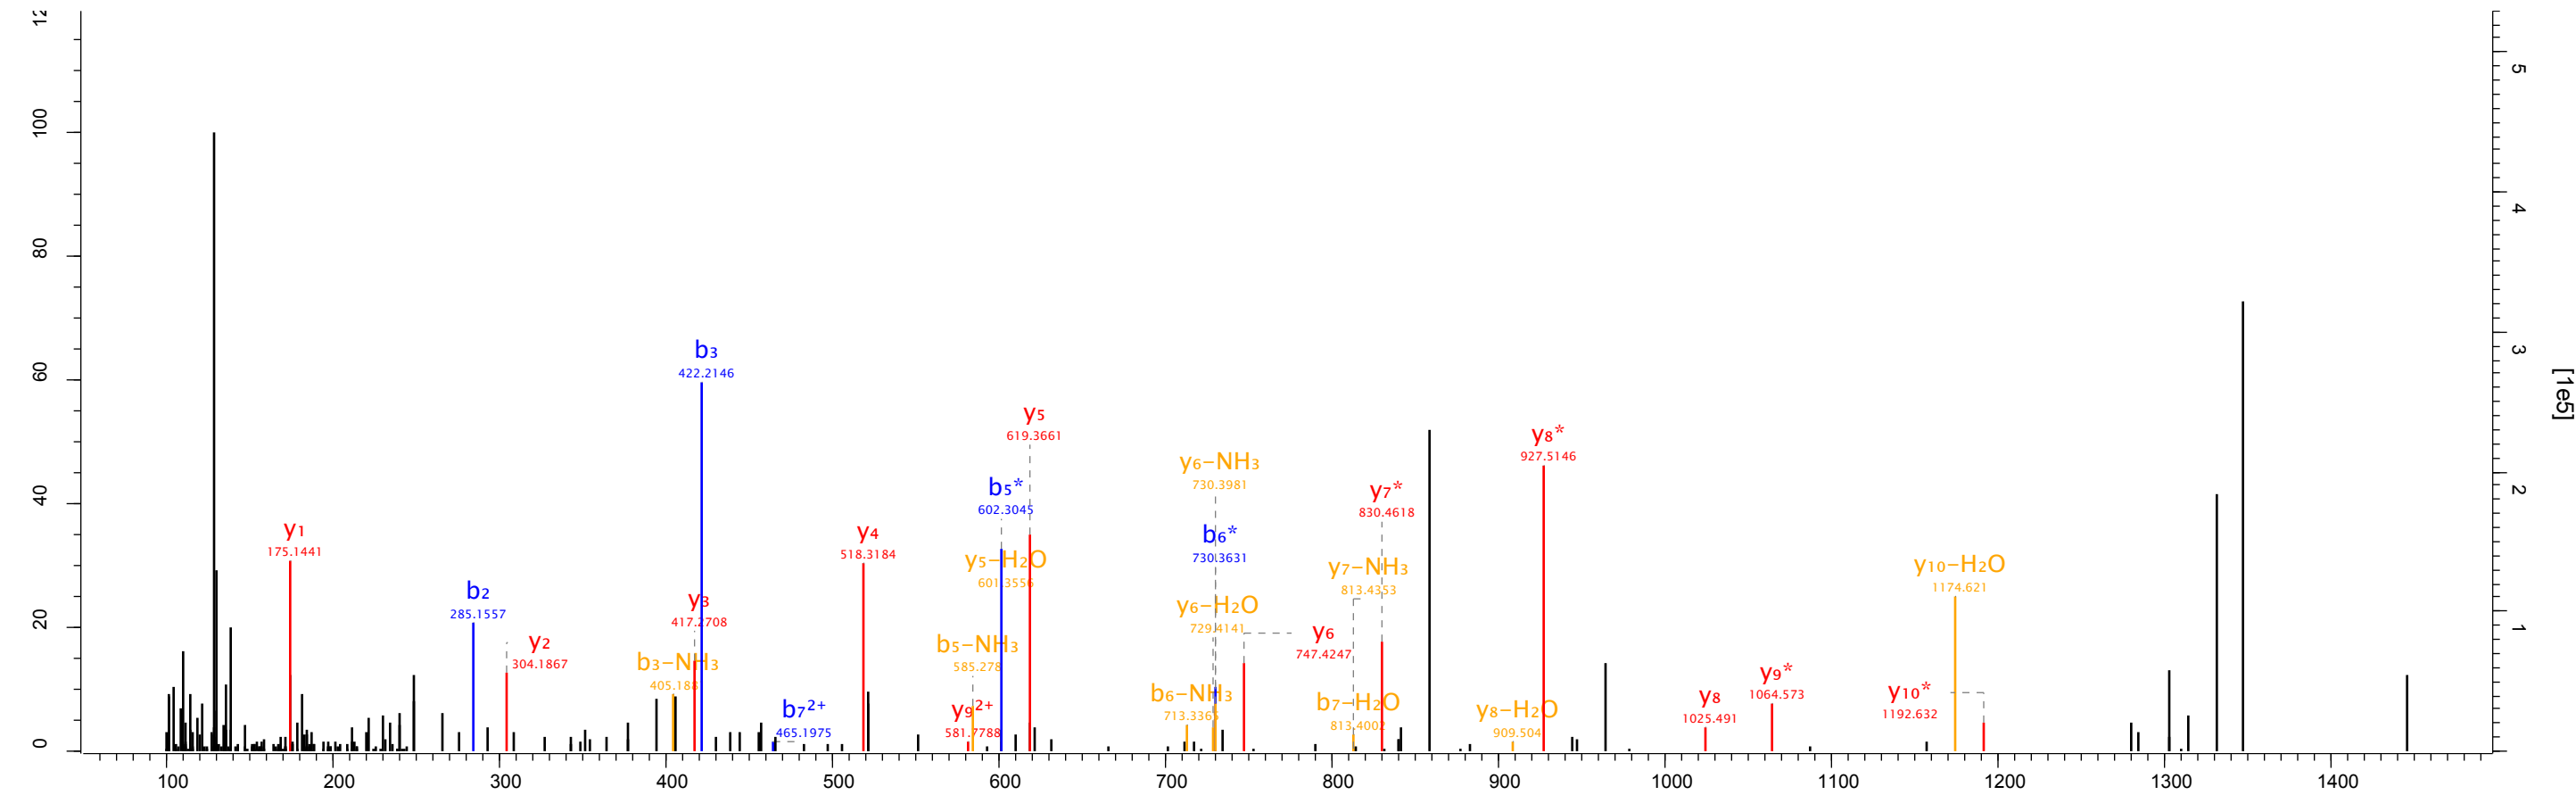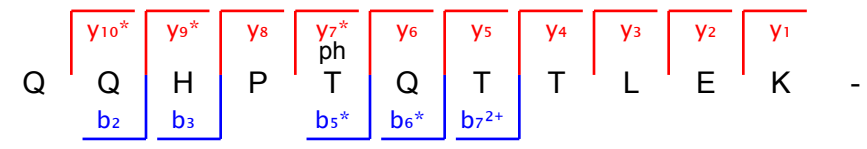

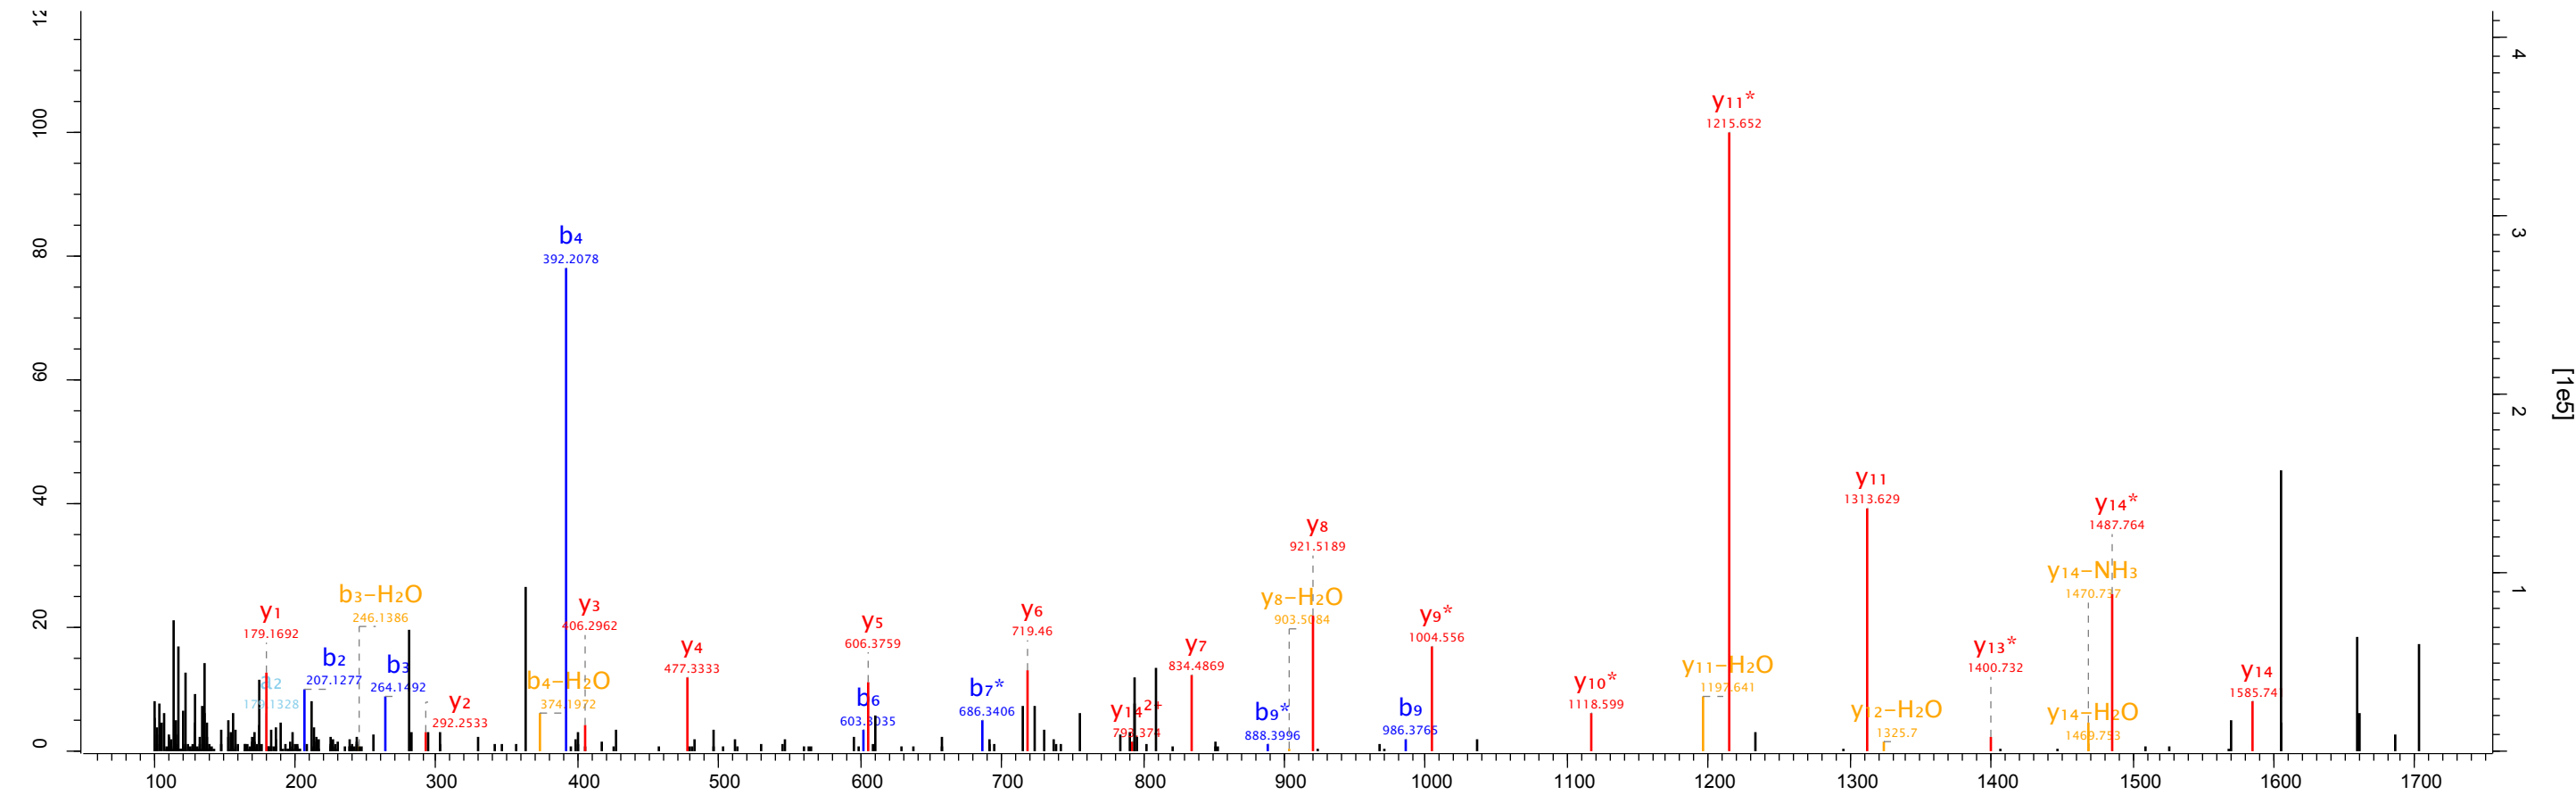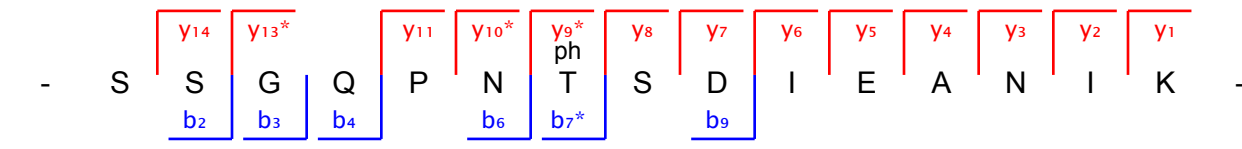

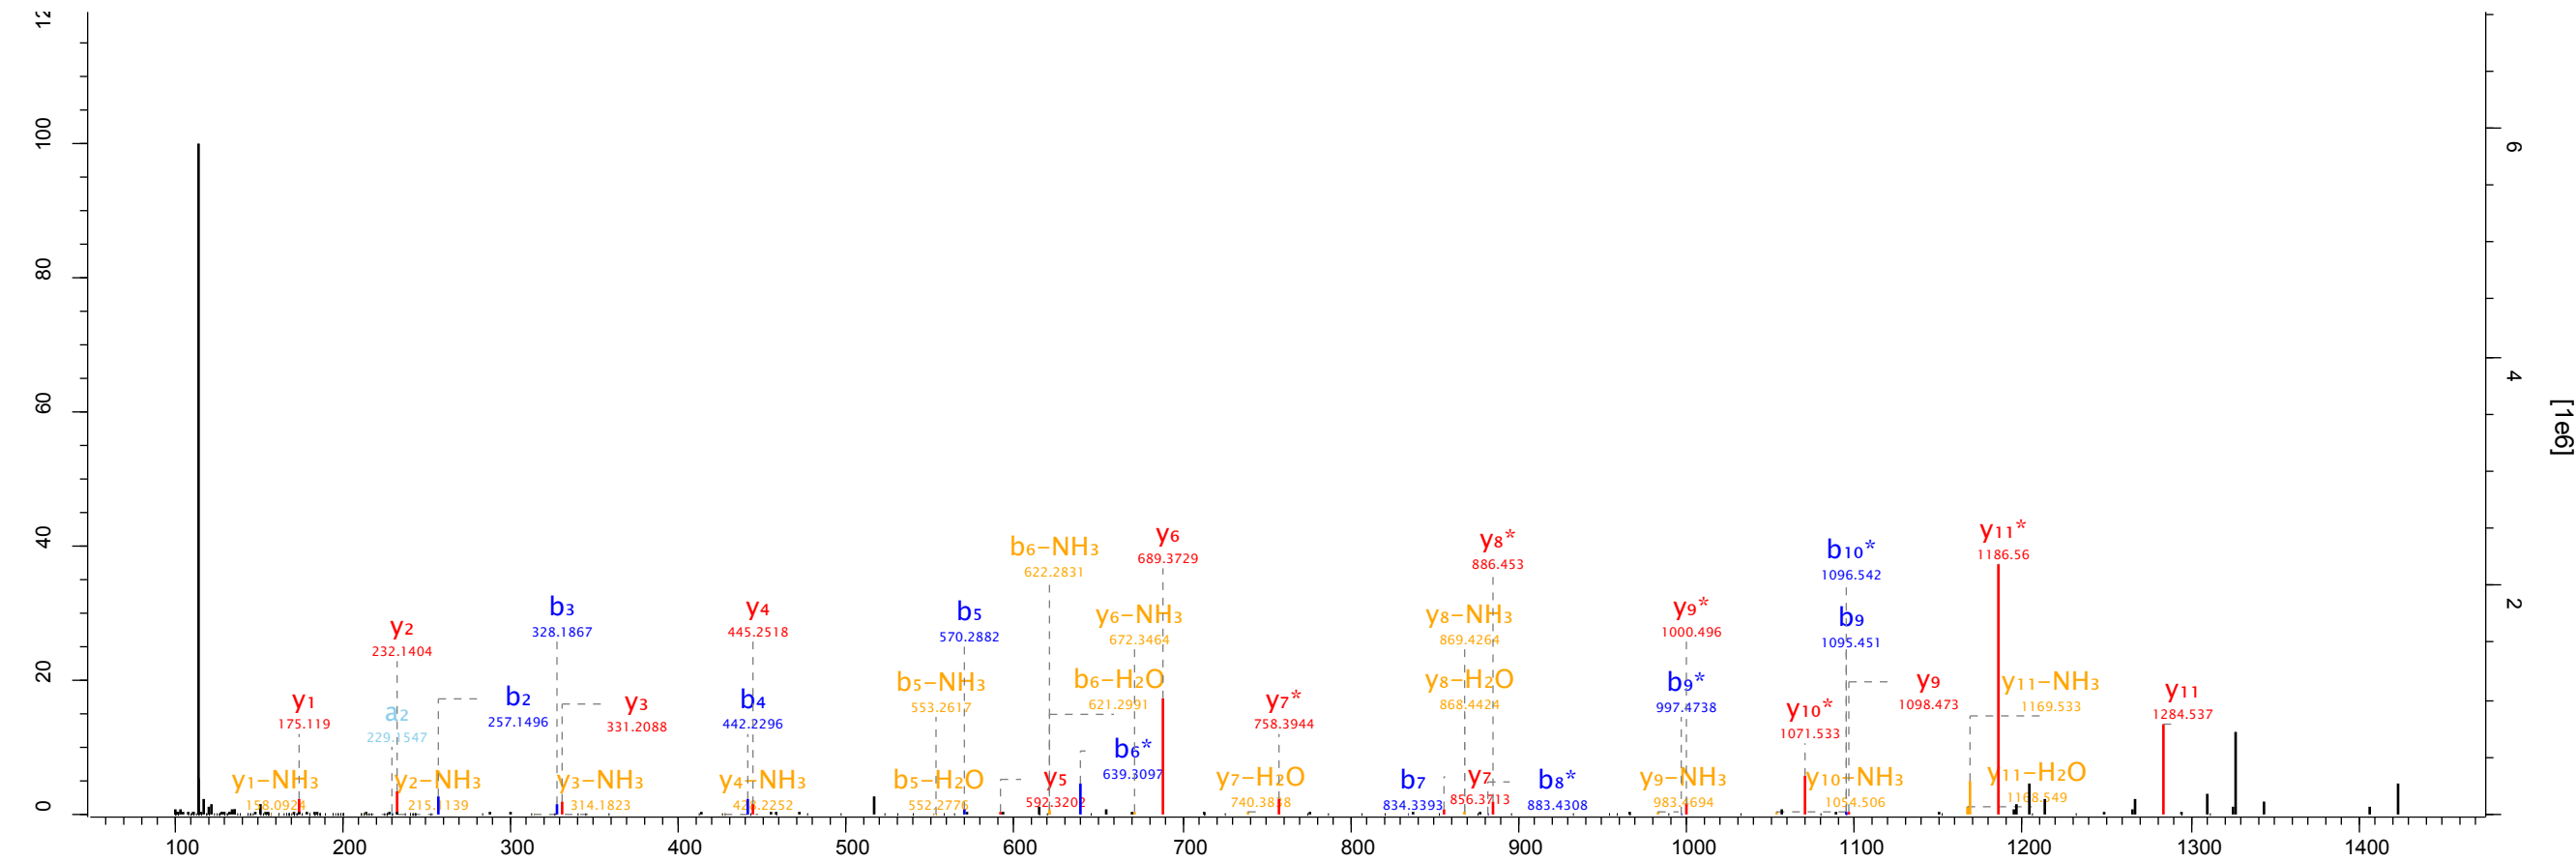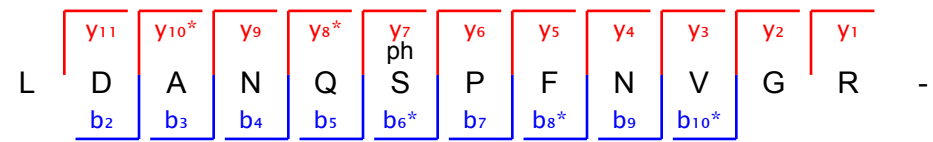

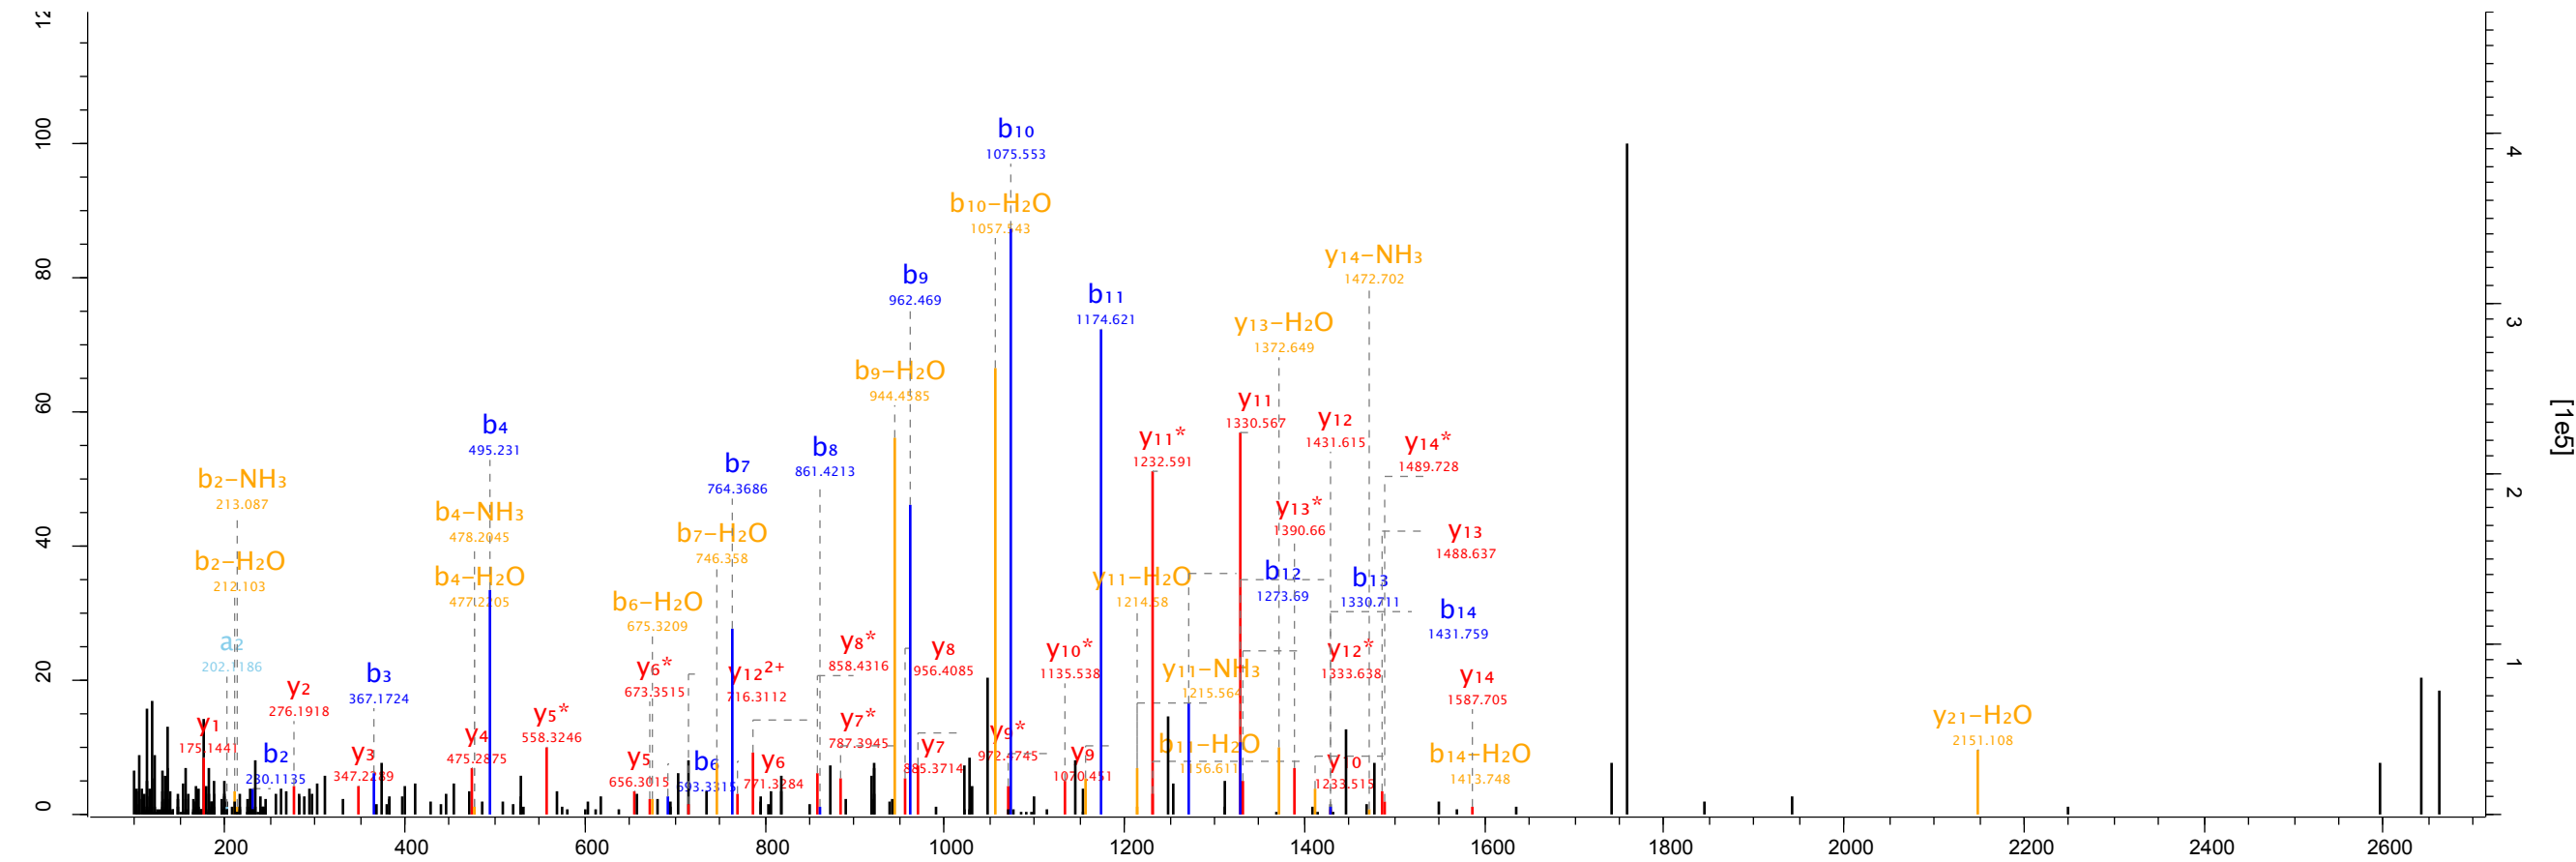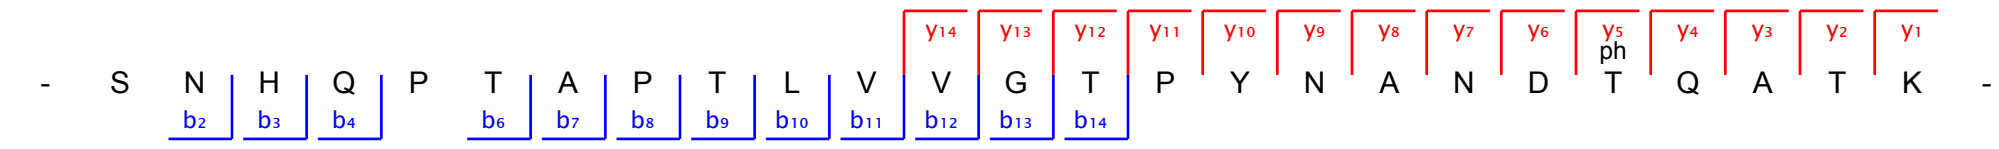

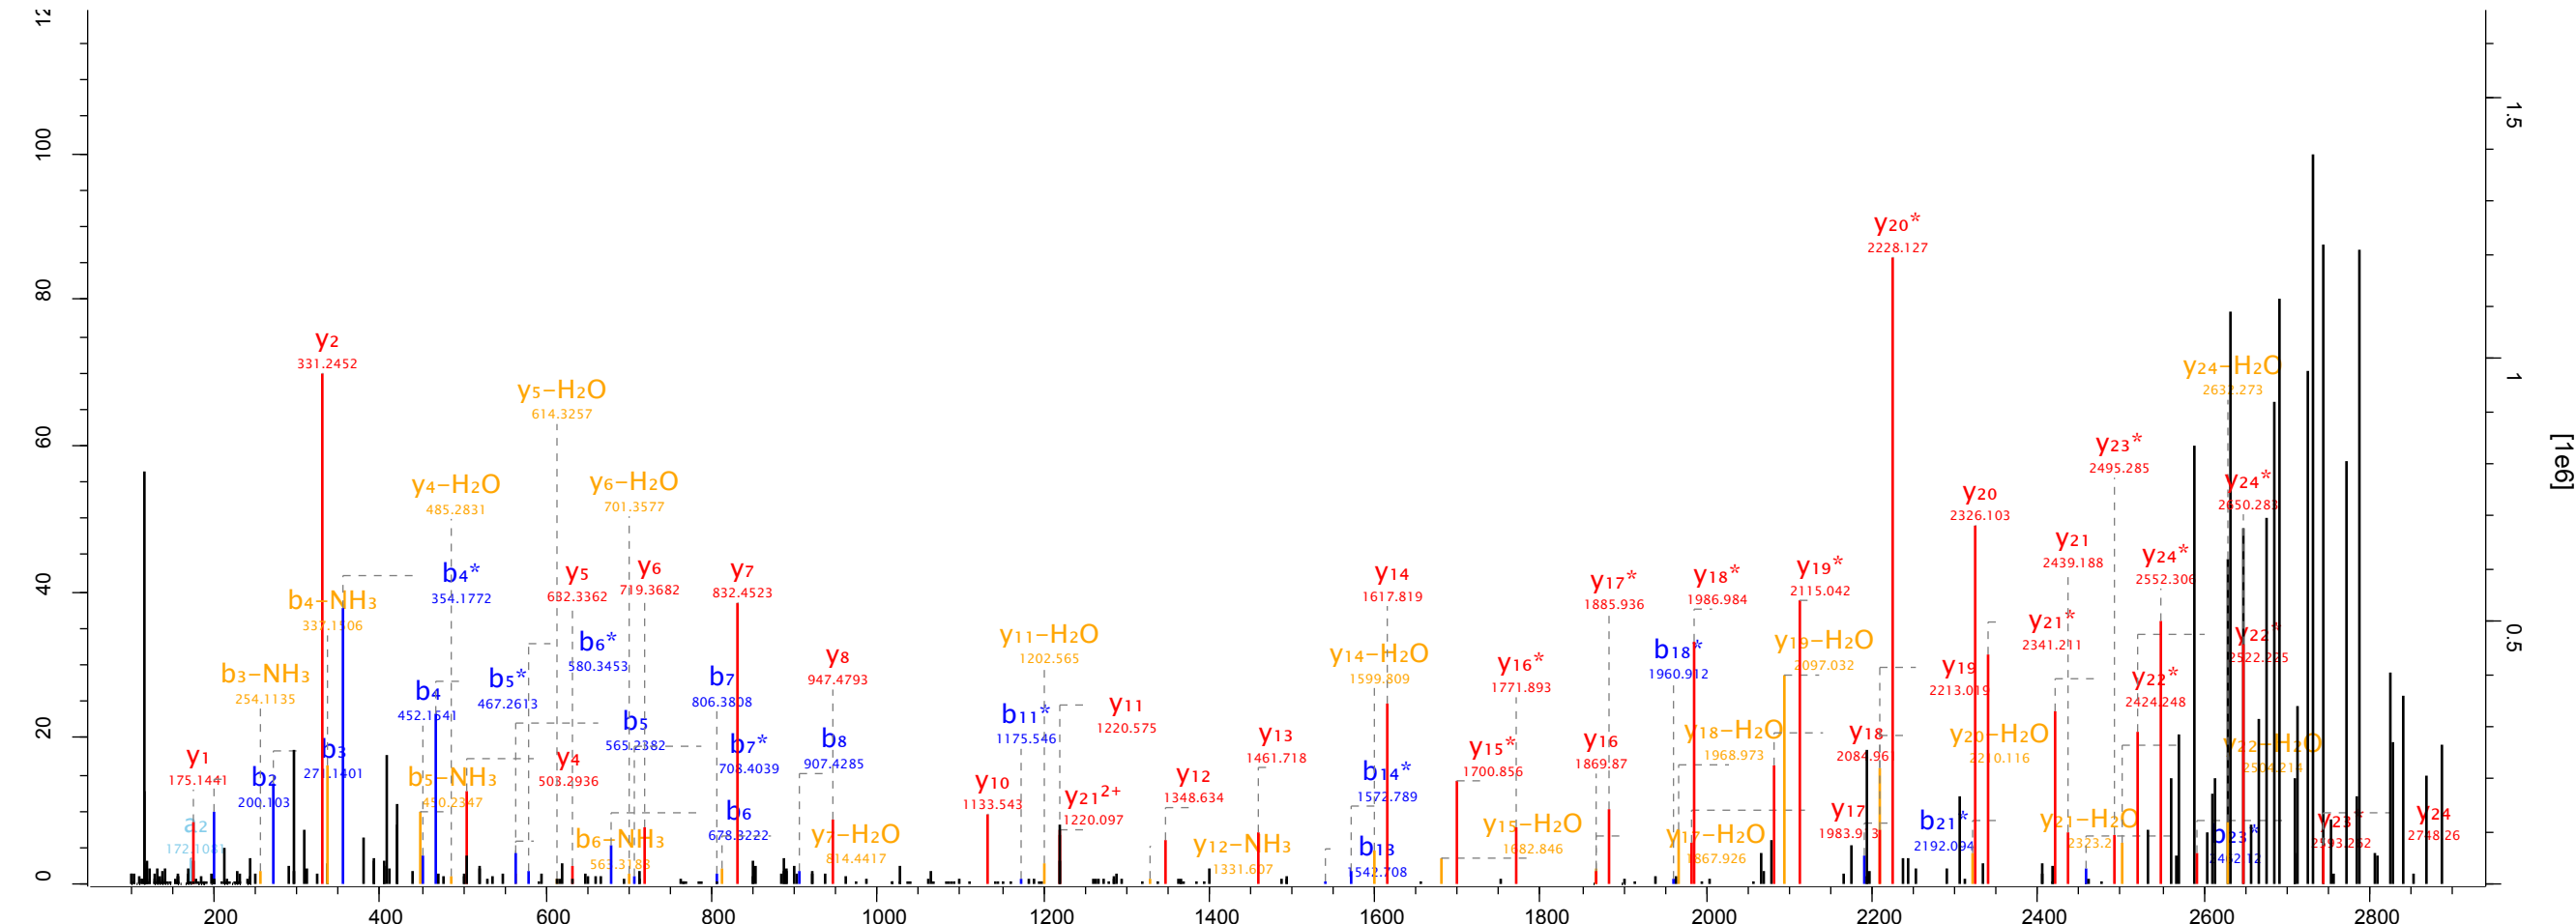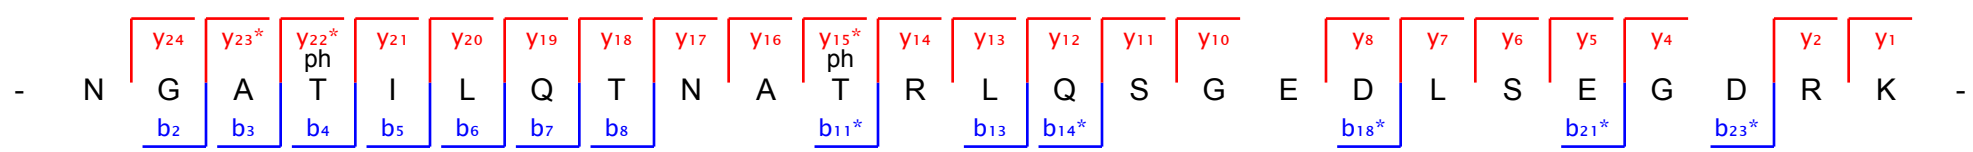

- N G A T I L Q T N A T R L Q S G E D L S E G D R K -



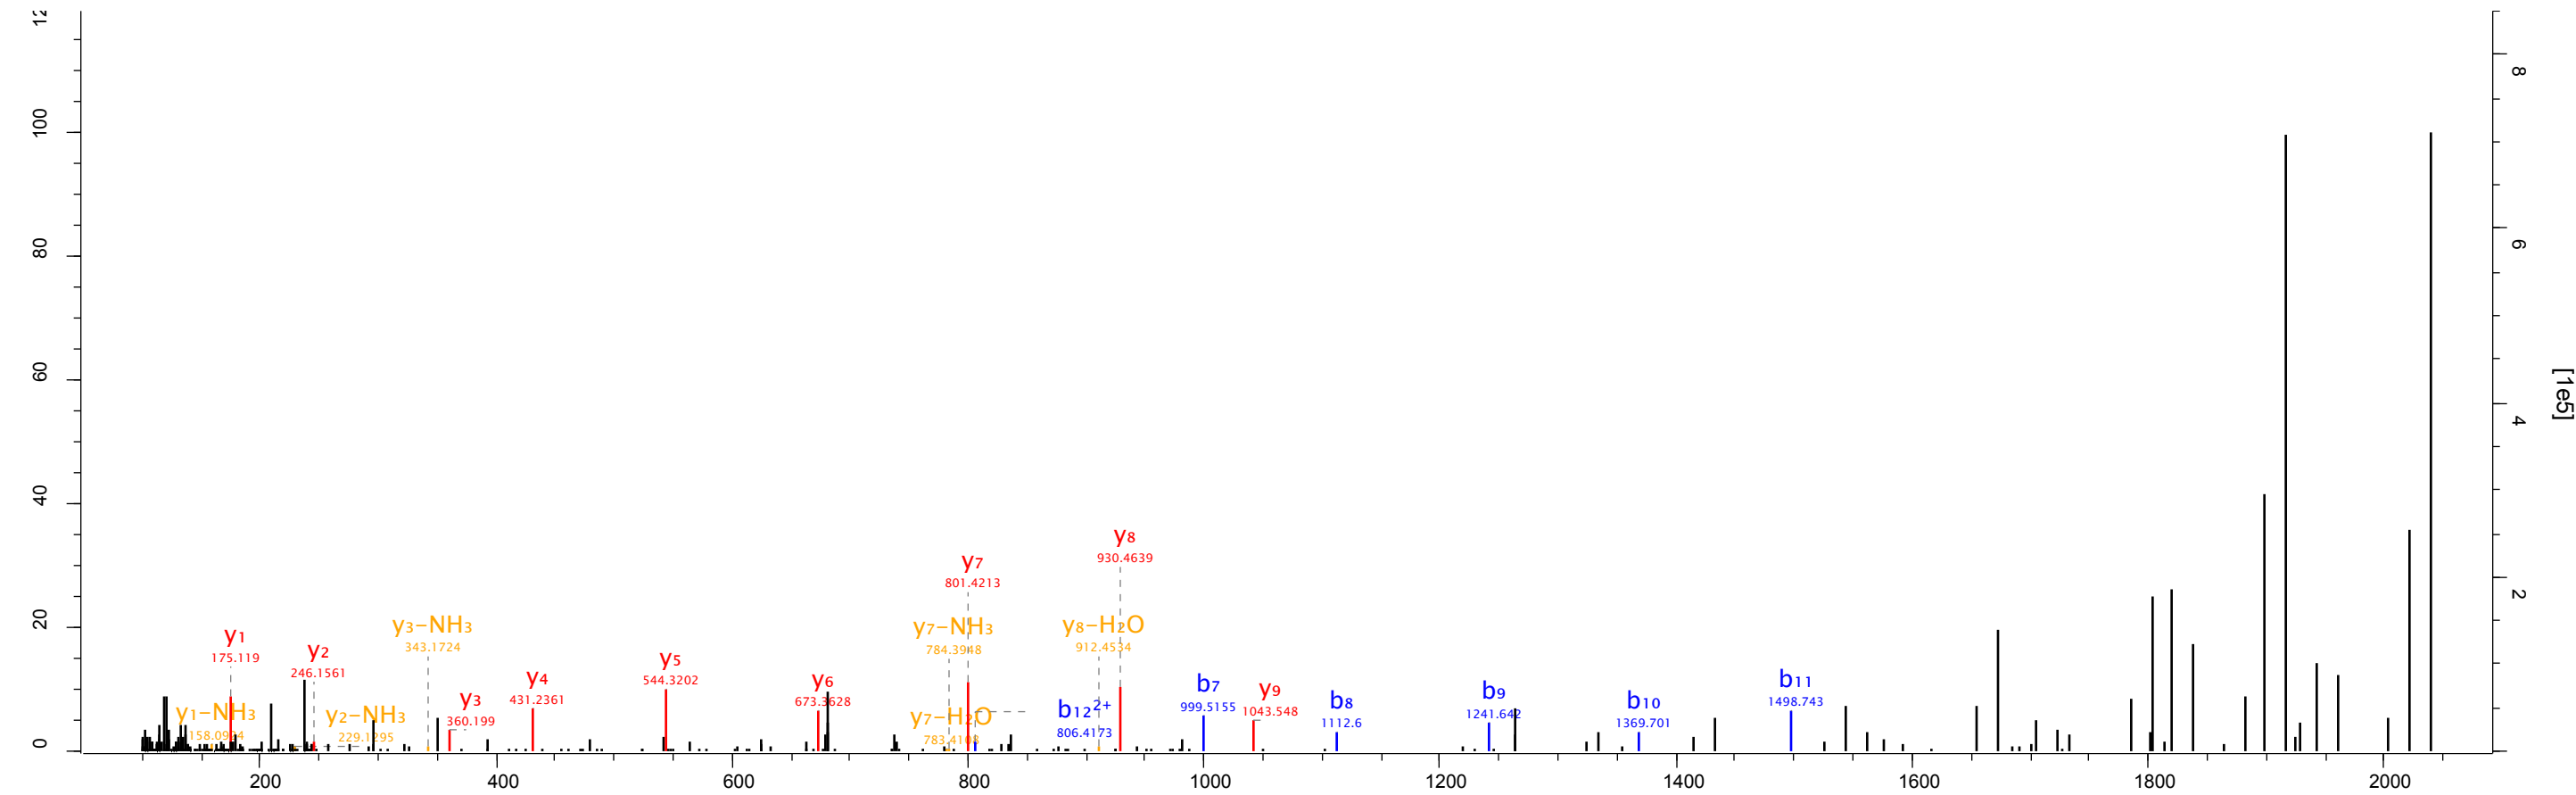

- ox ph  
M S N I Q E K I E Q E L A N A R -  
b7 b8 b9 b10 b11 b12<sup>2+</sup> y9 y8 y7 y6 y5 y4 y3 y2 y1

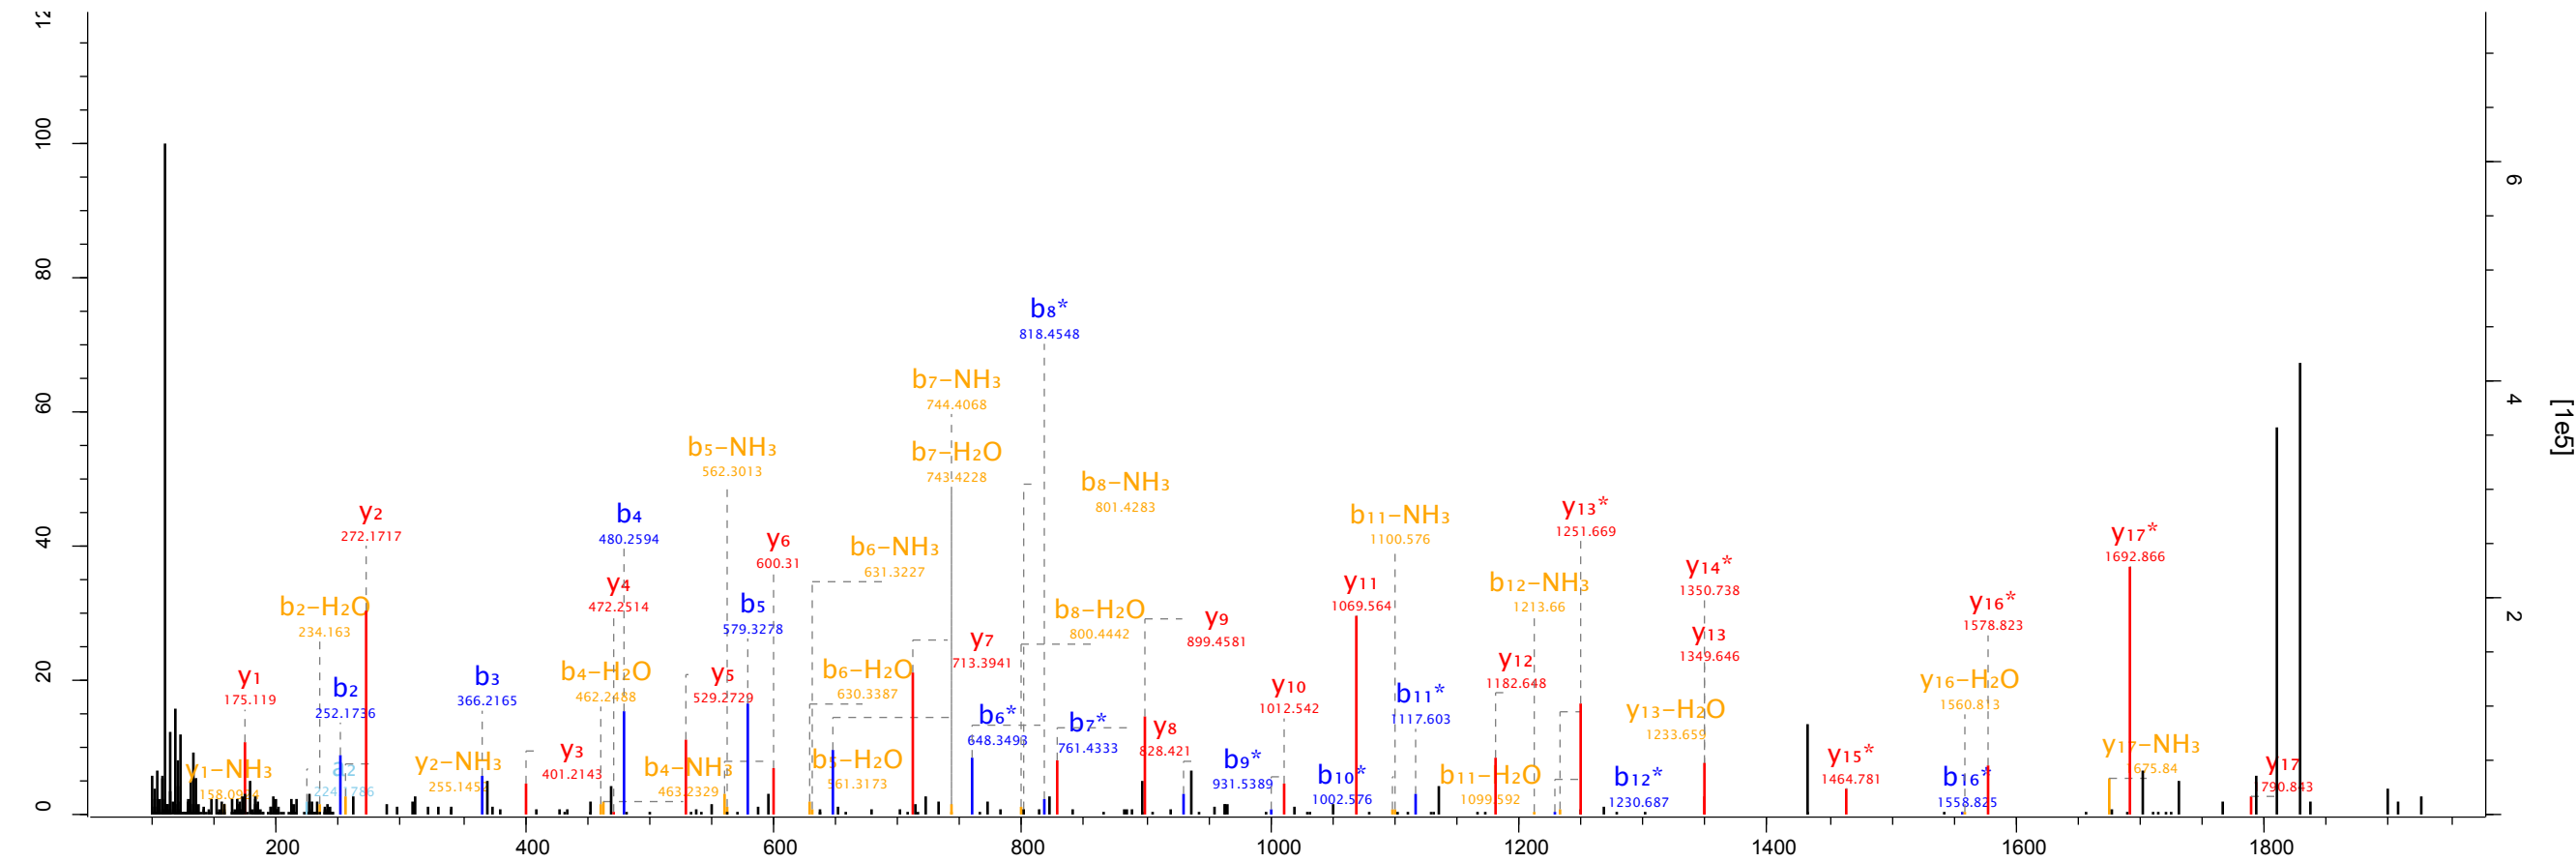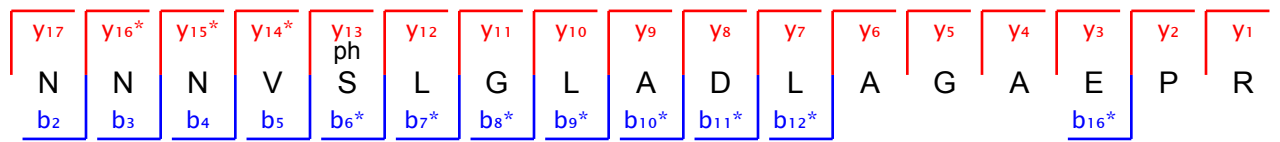

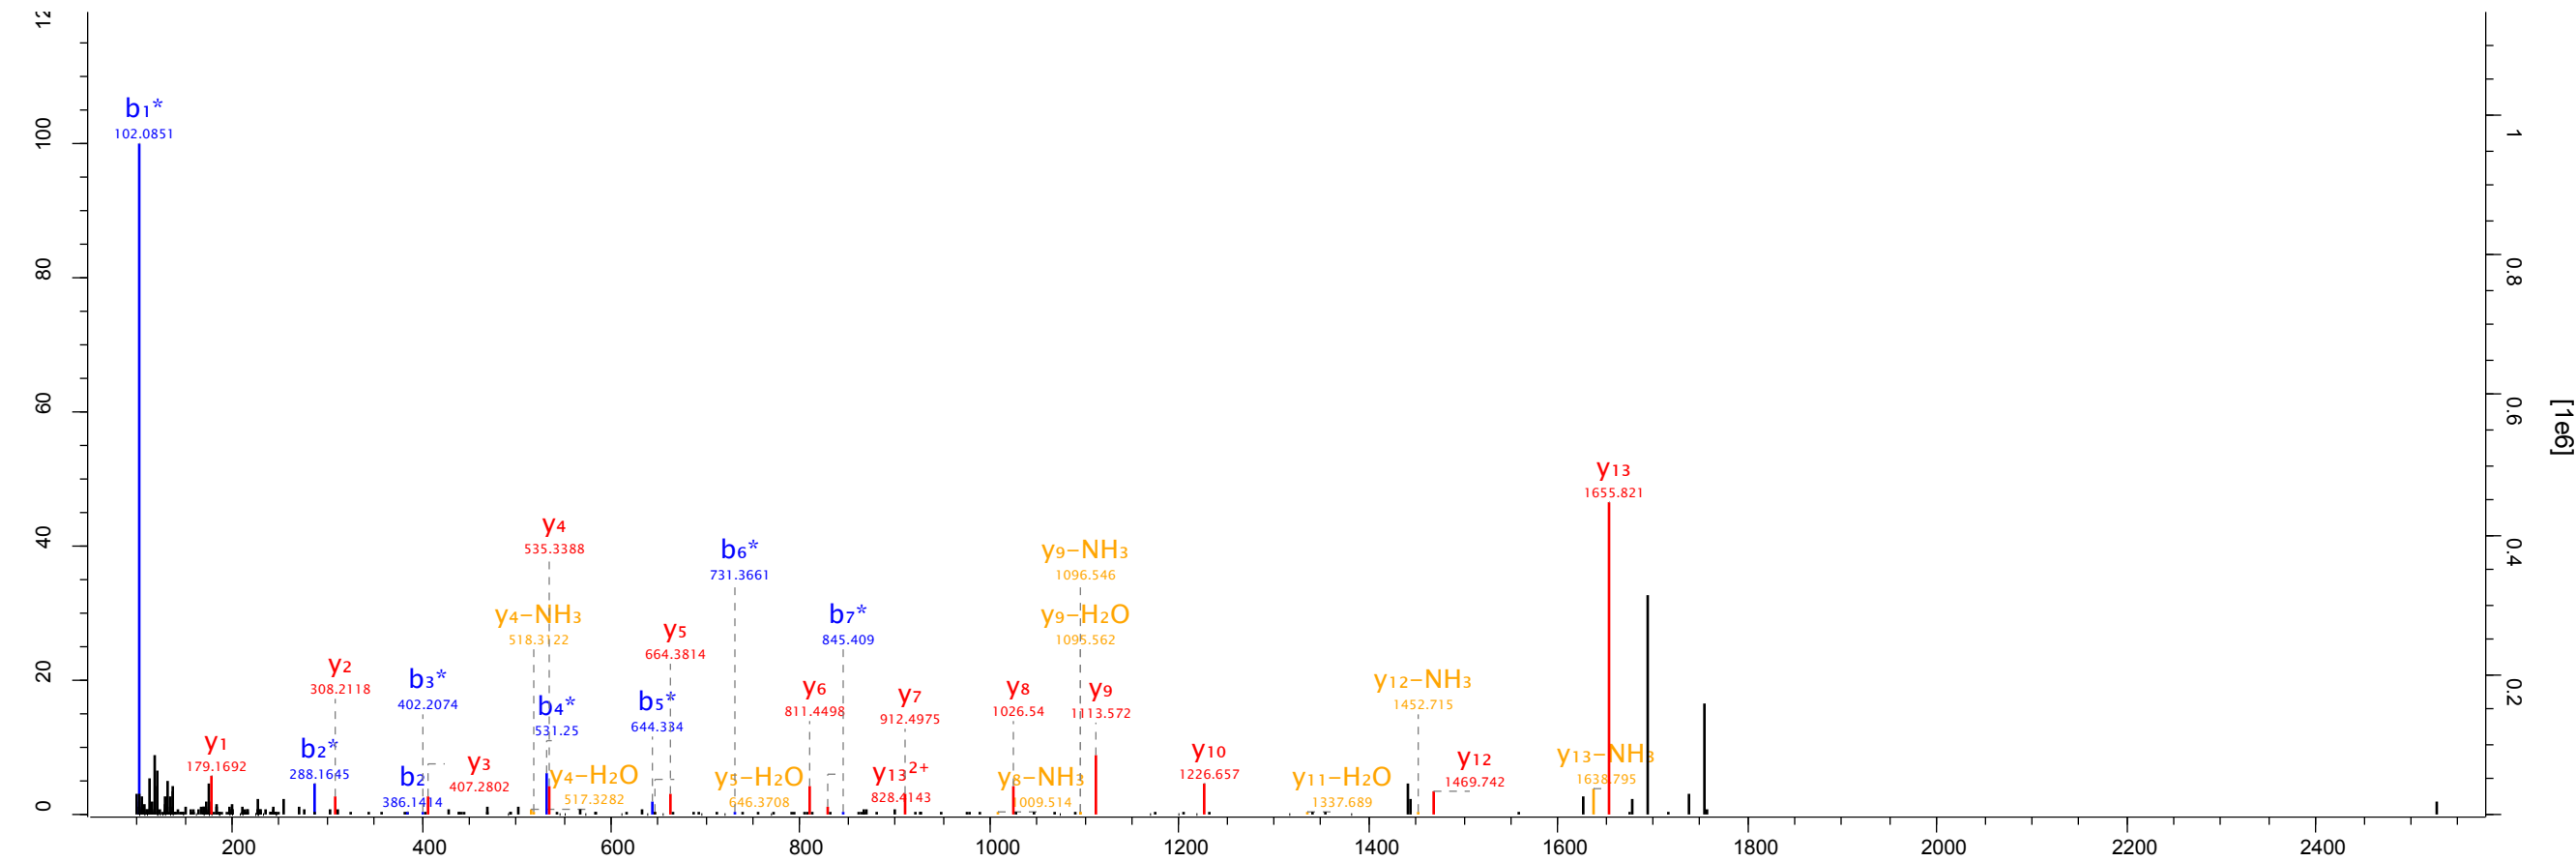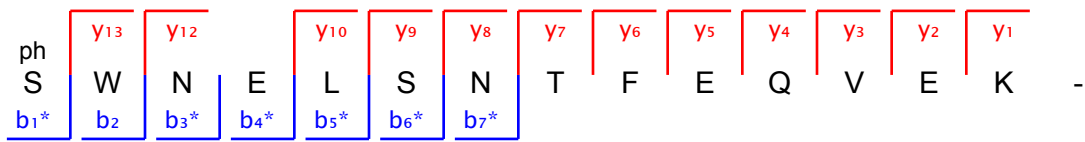

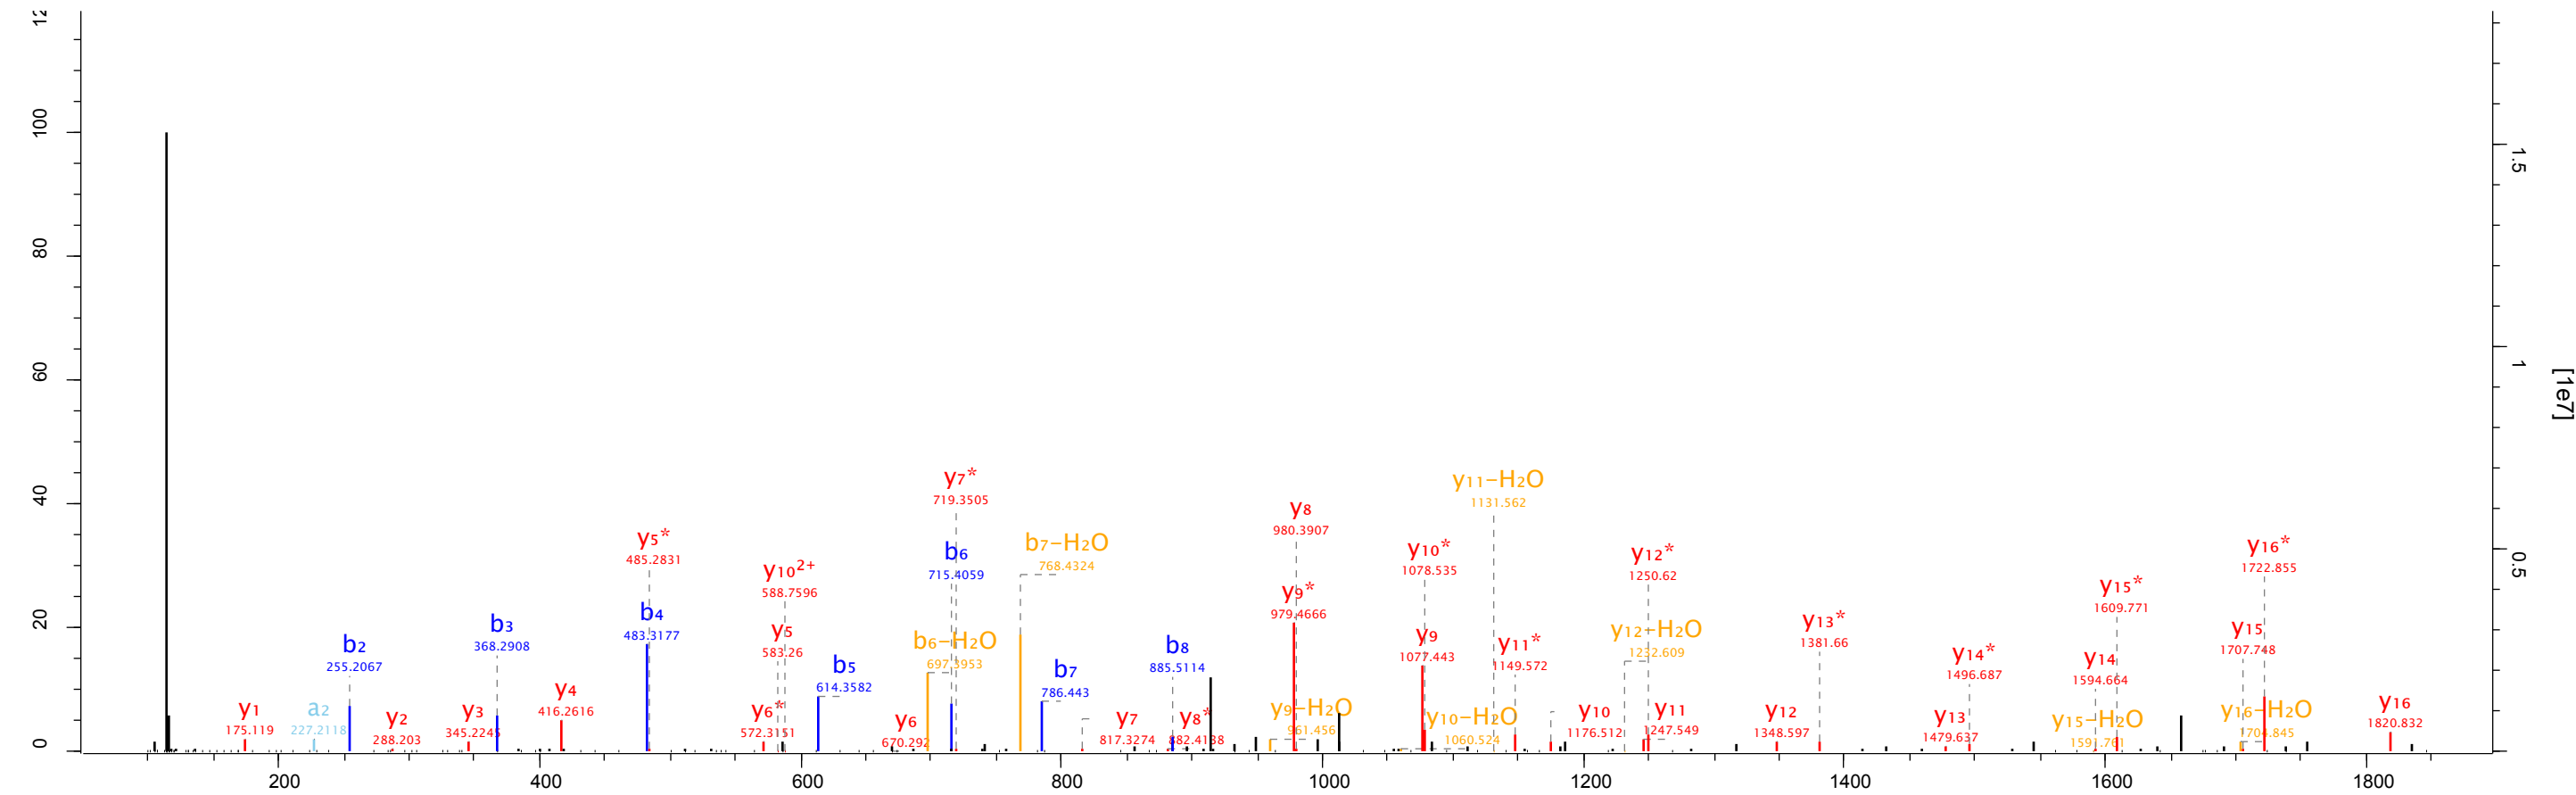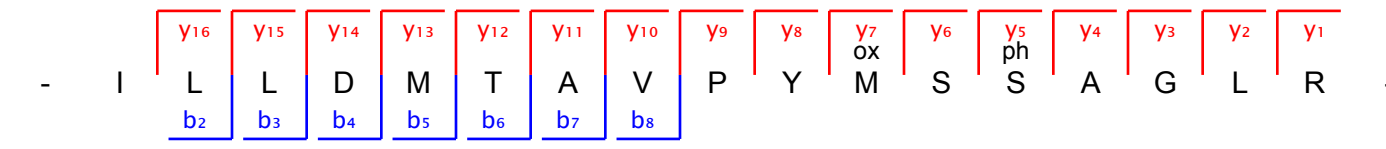

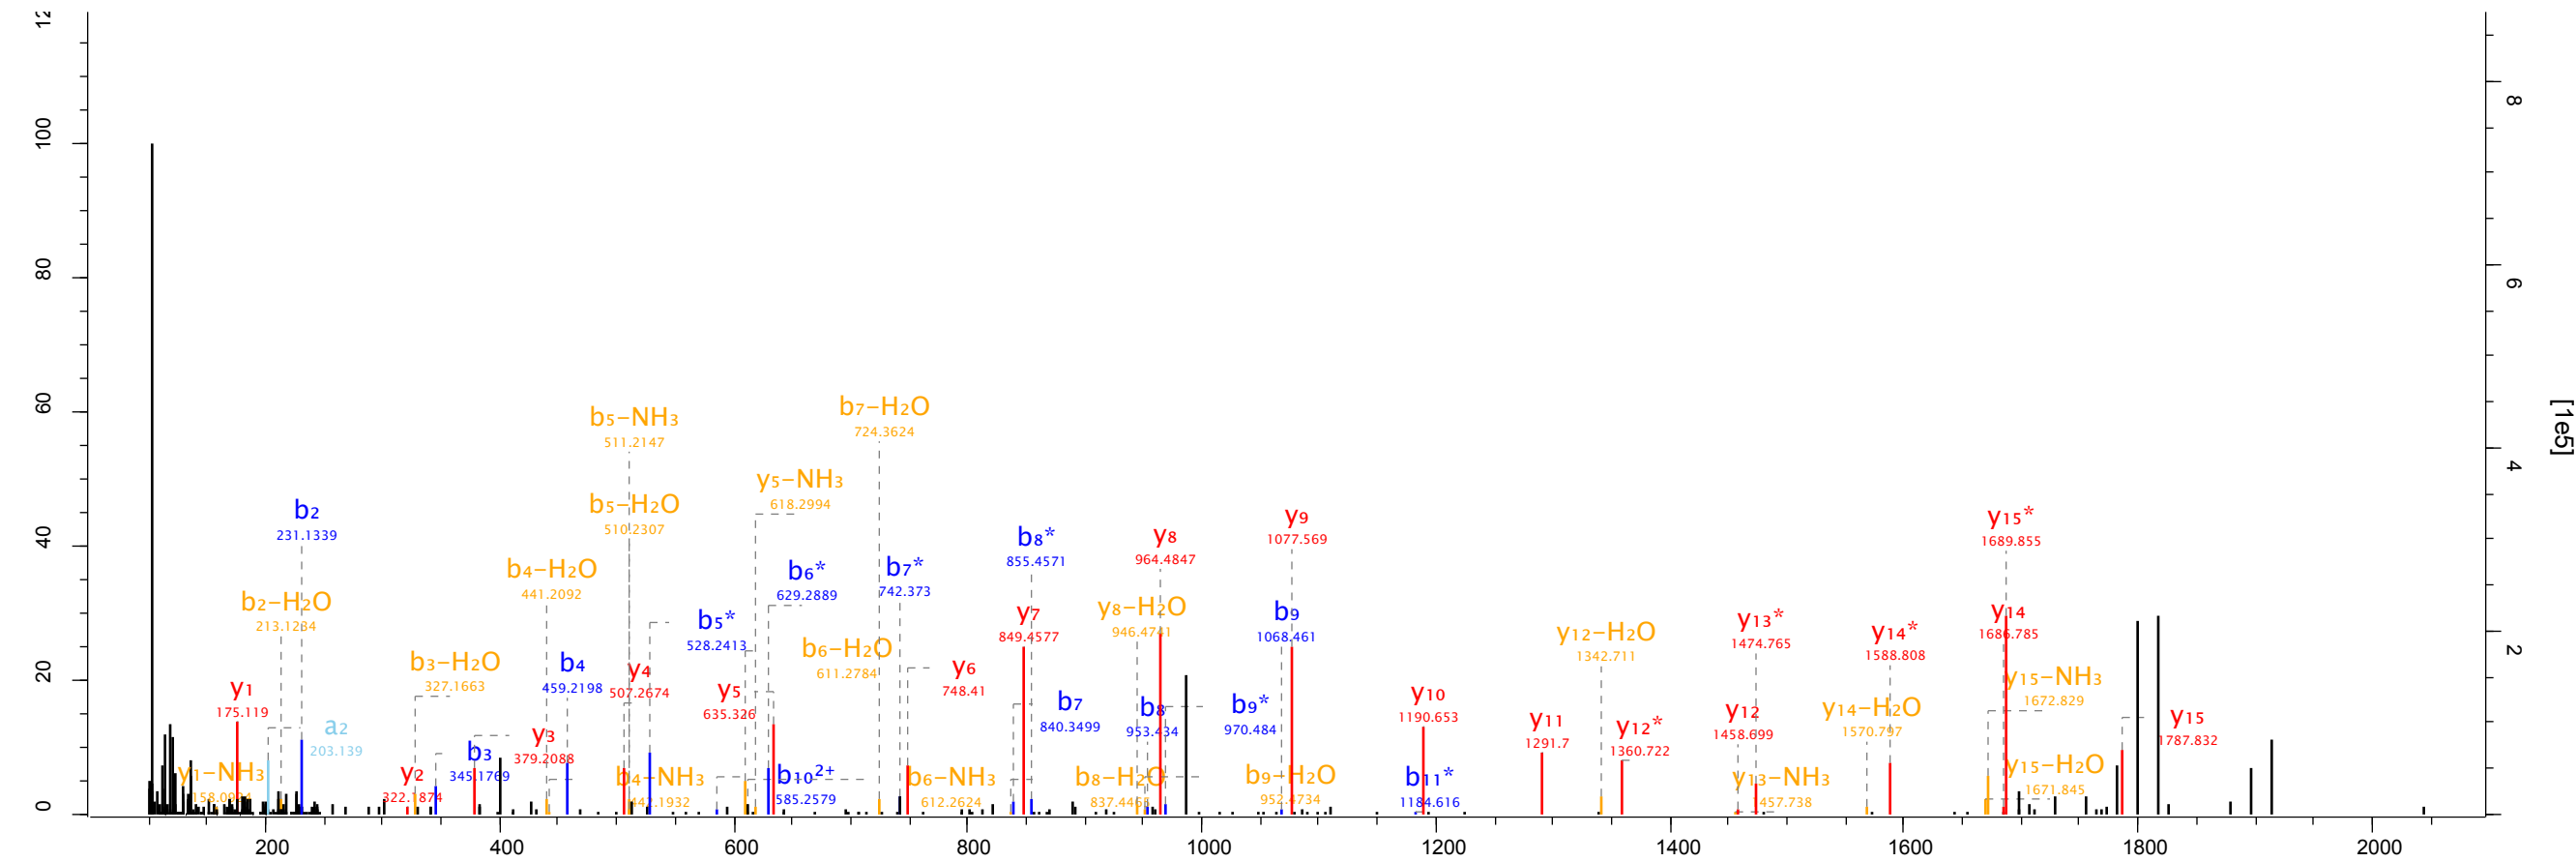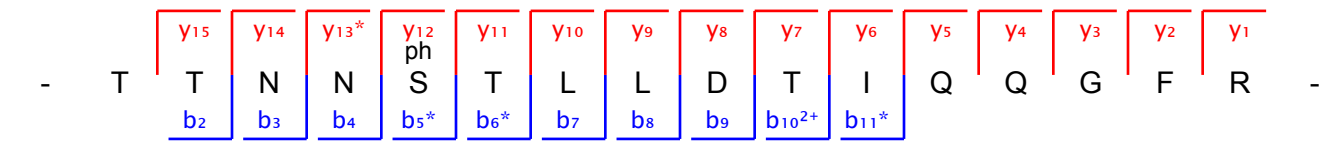

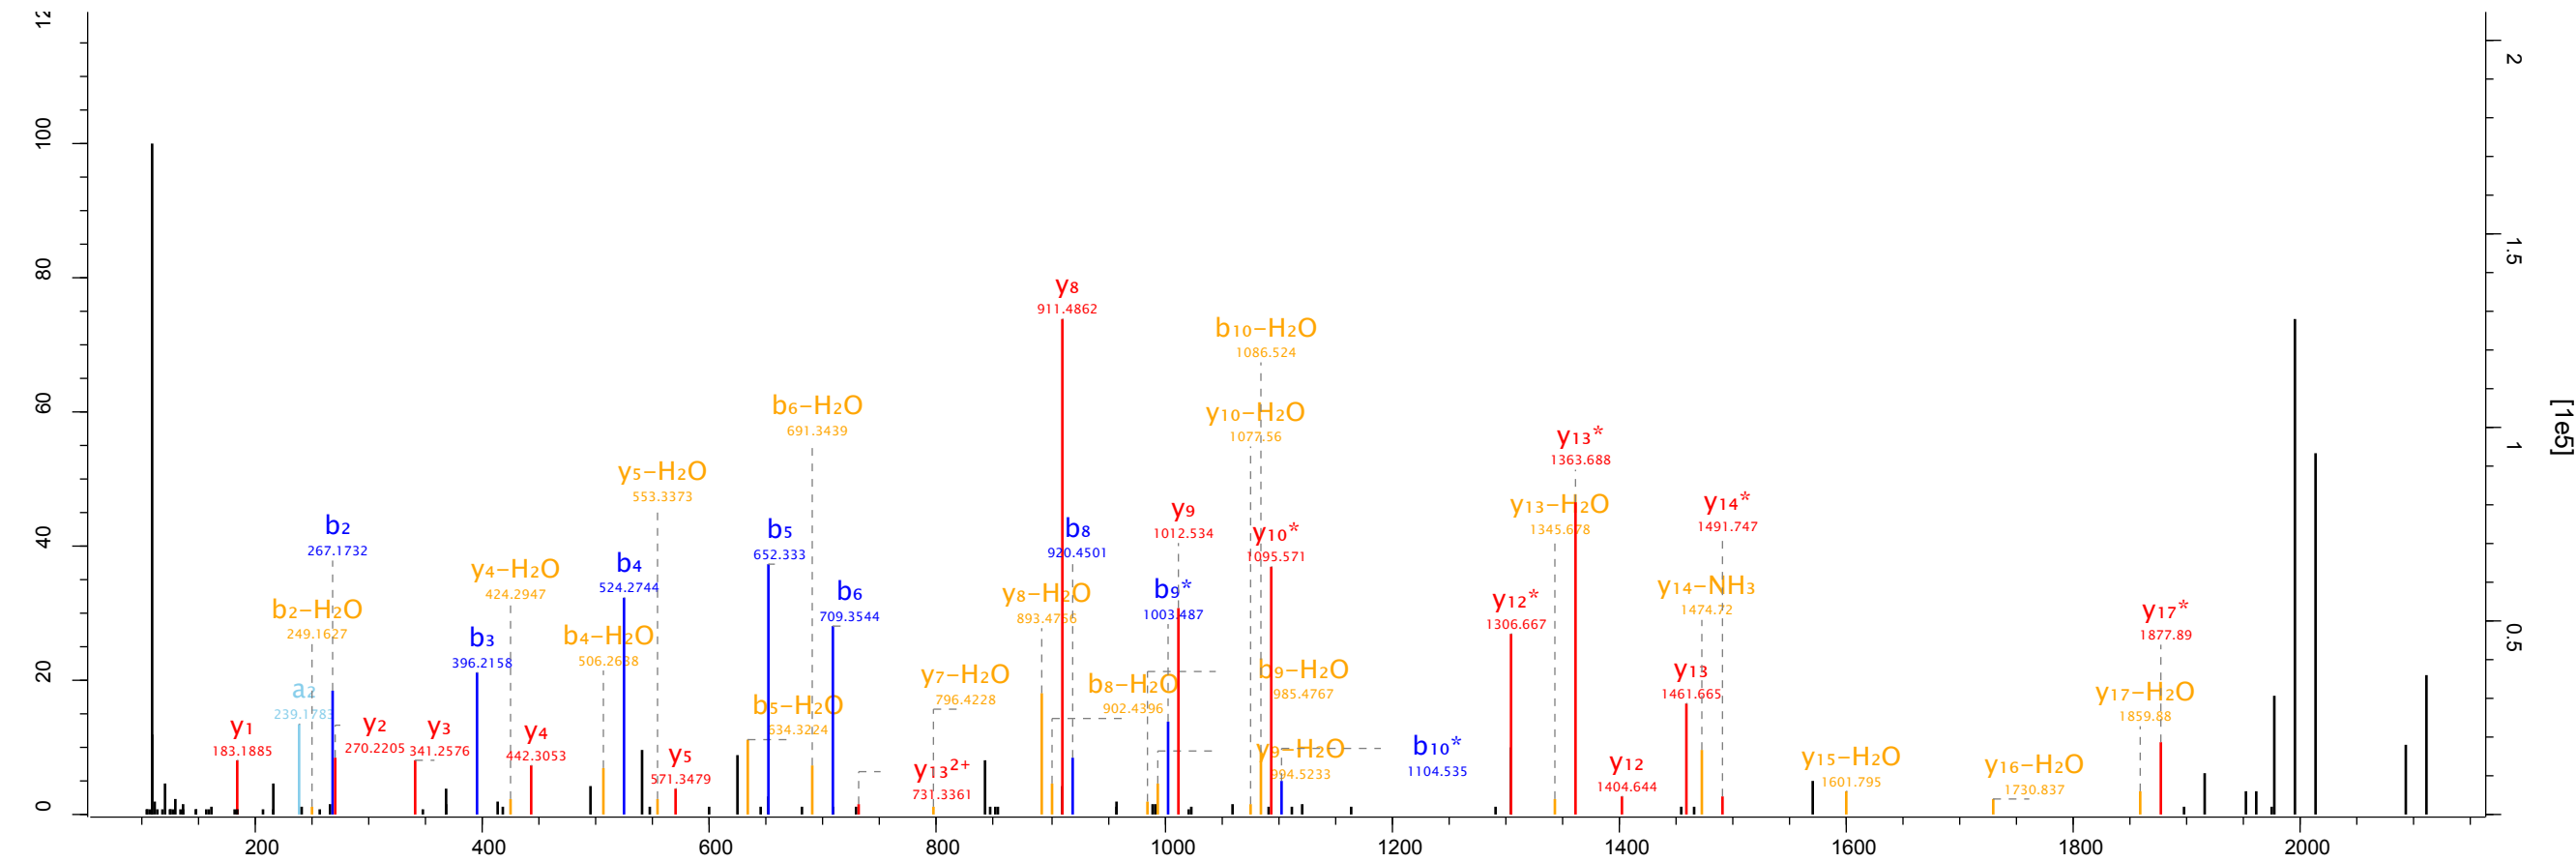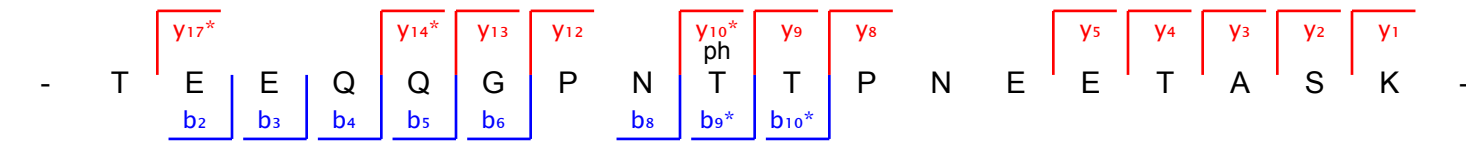

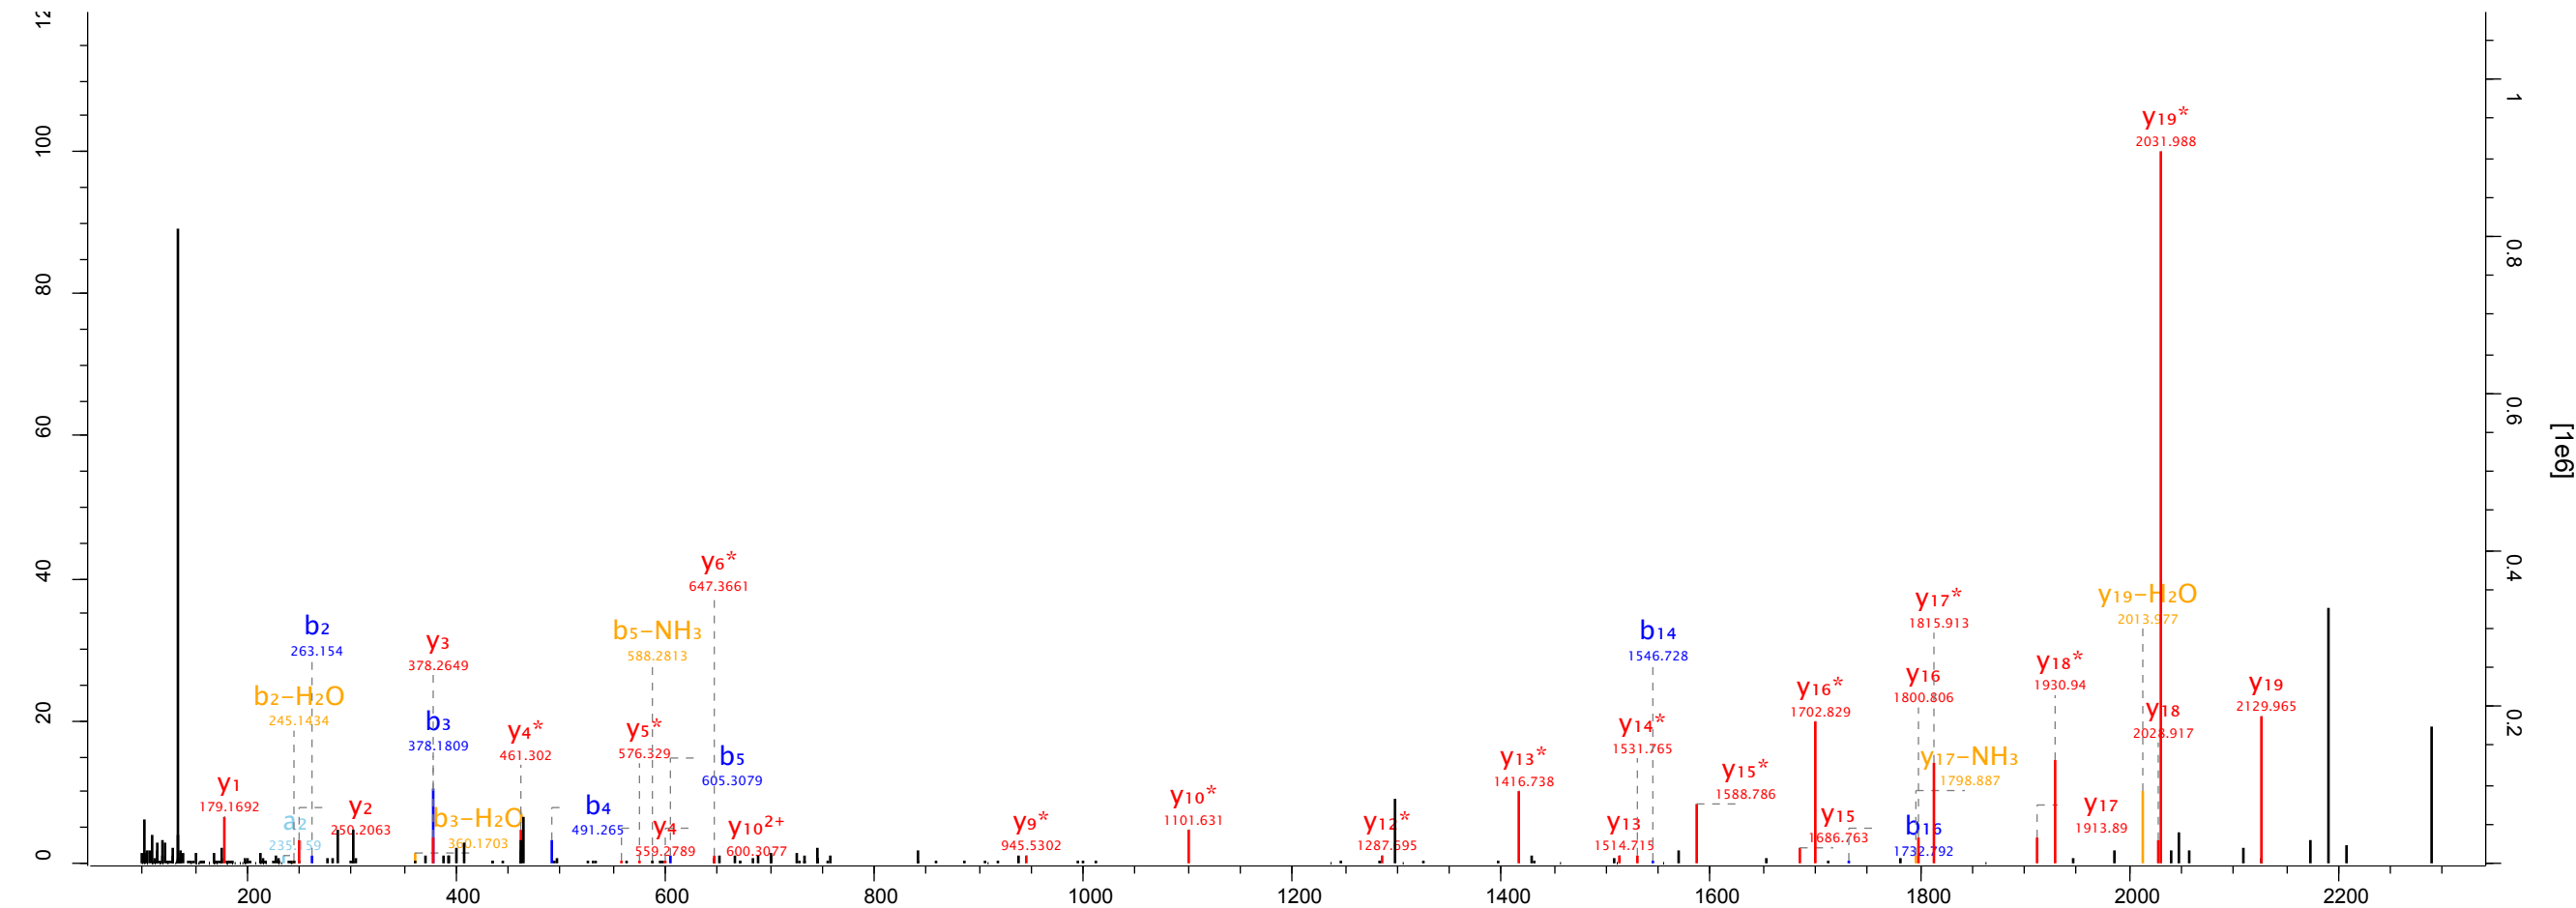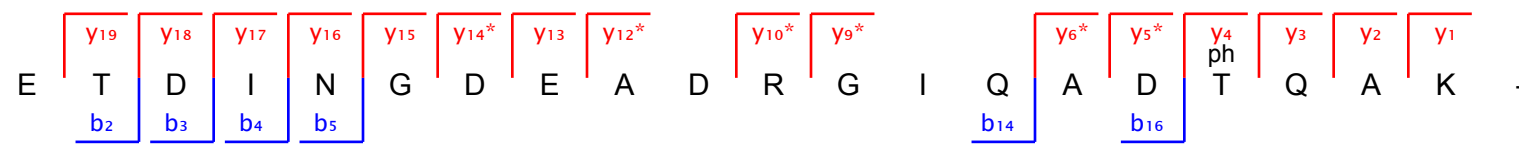





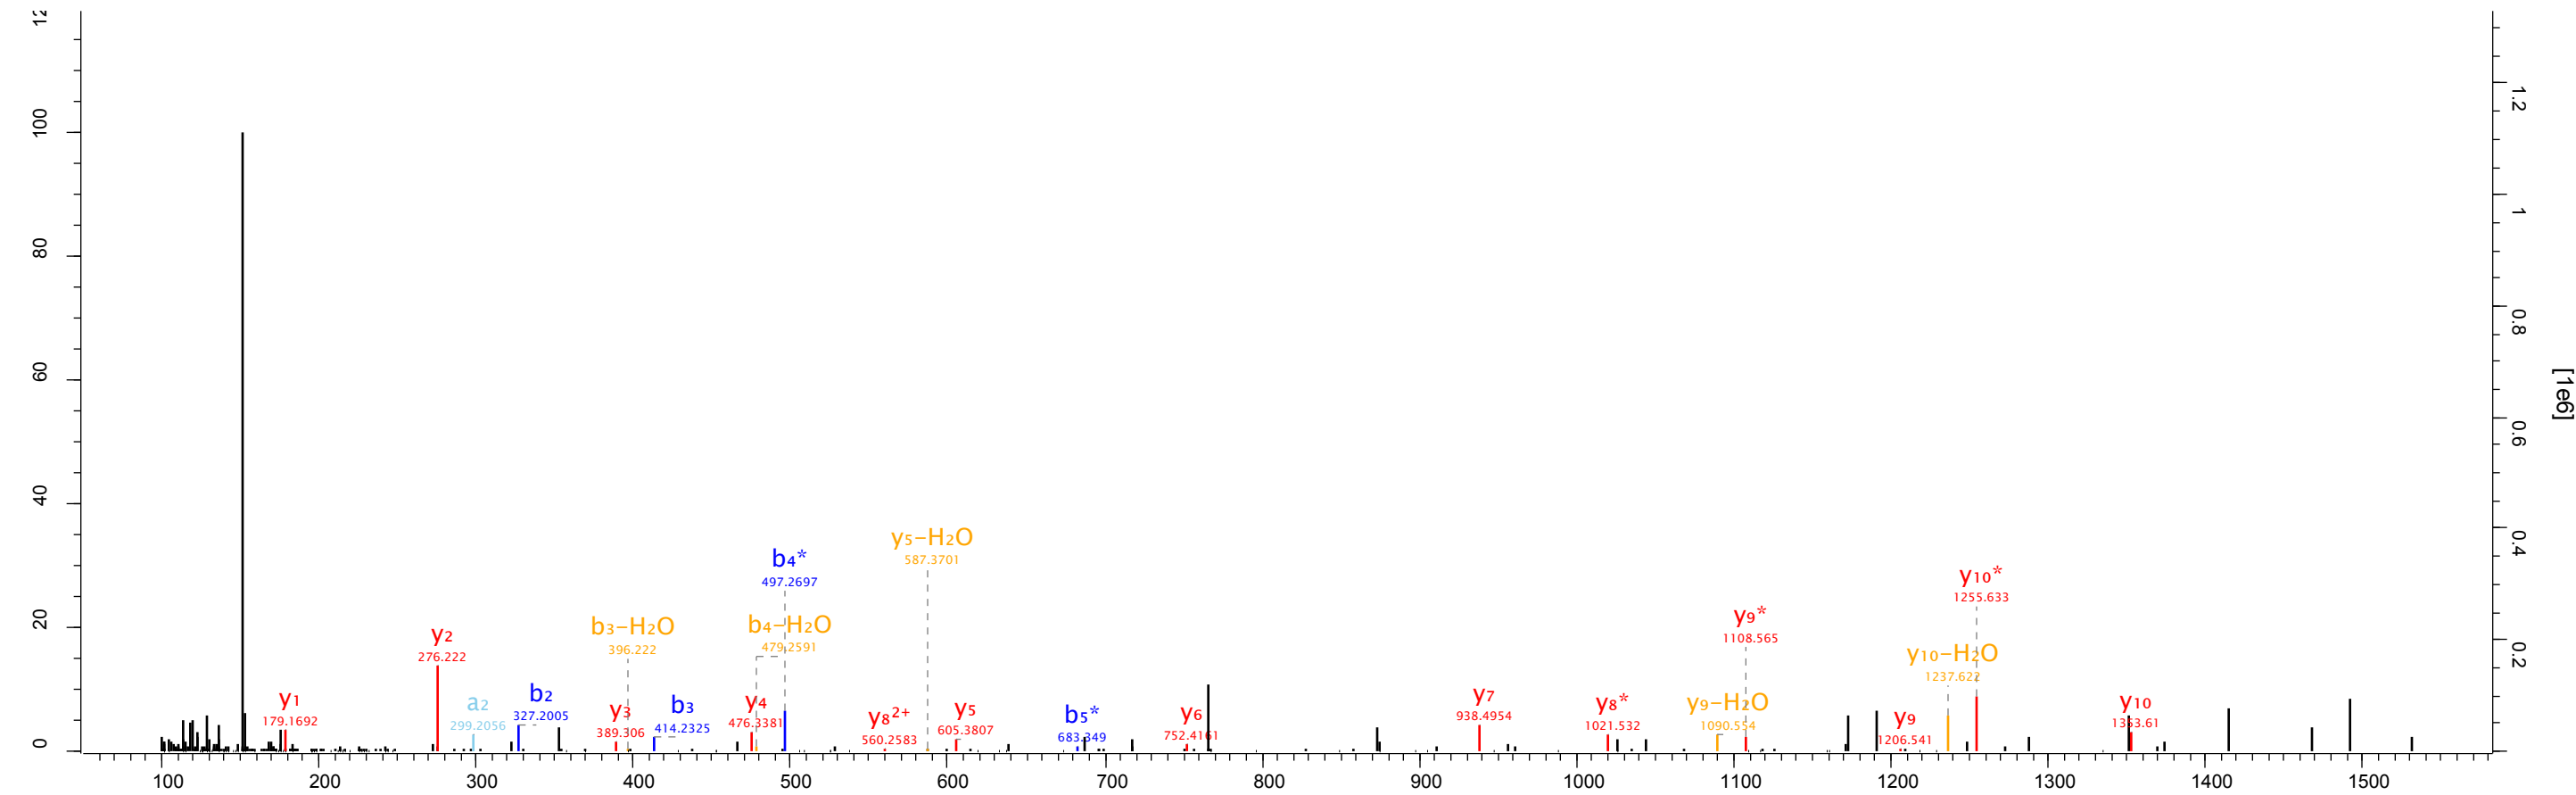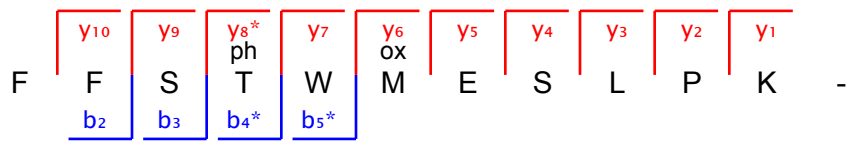

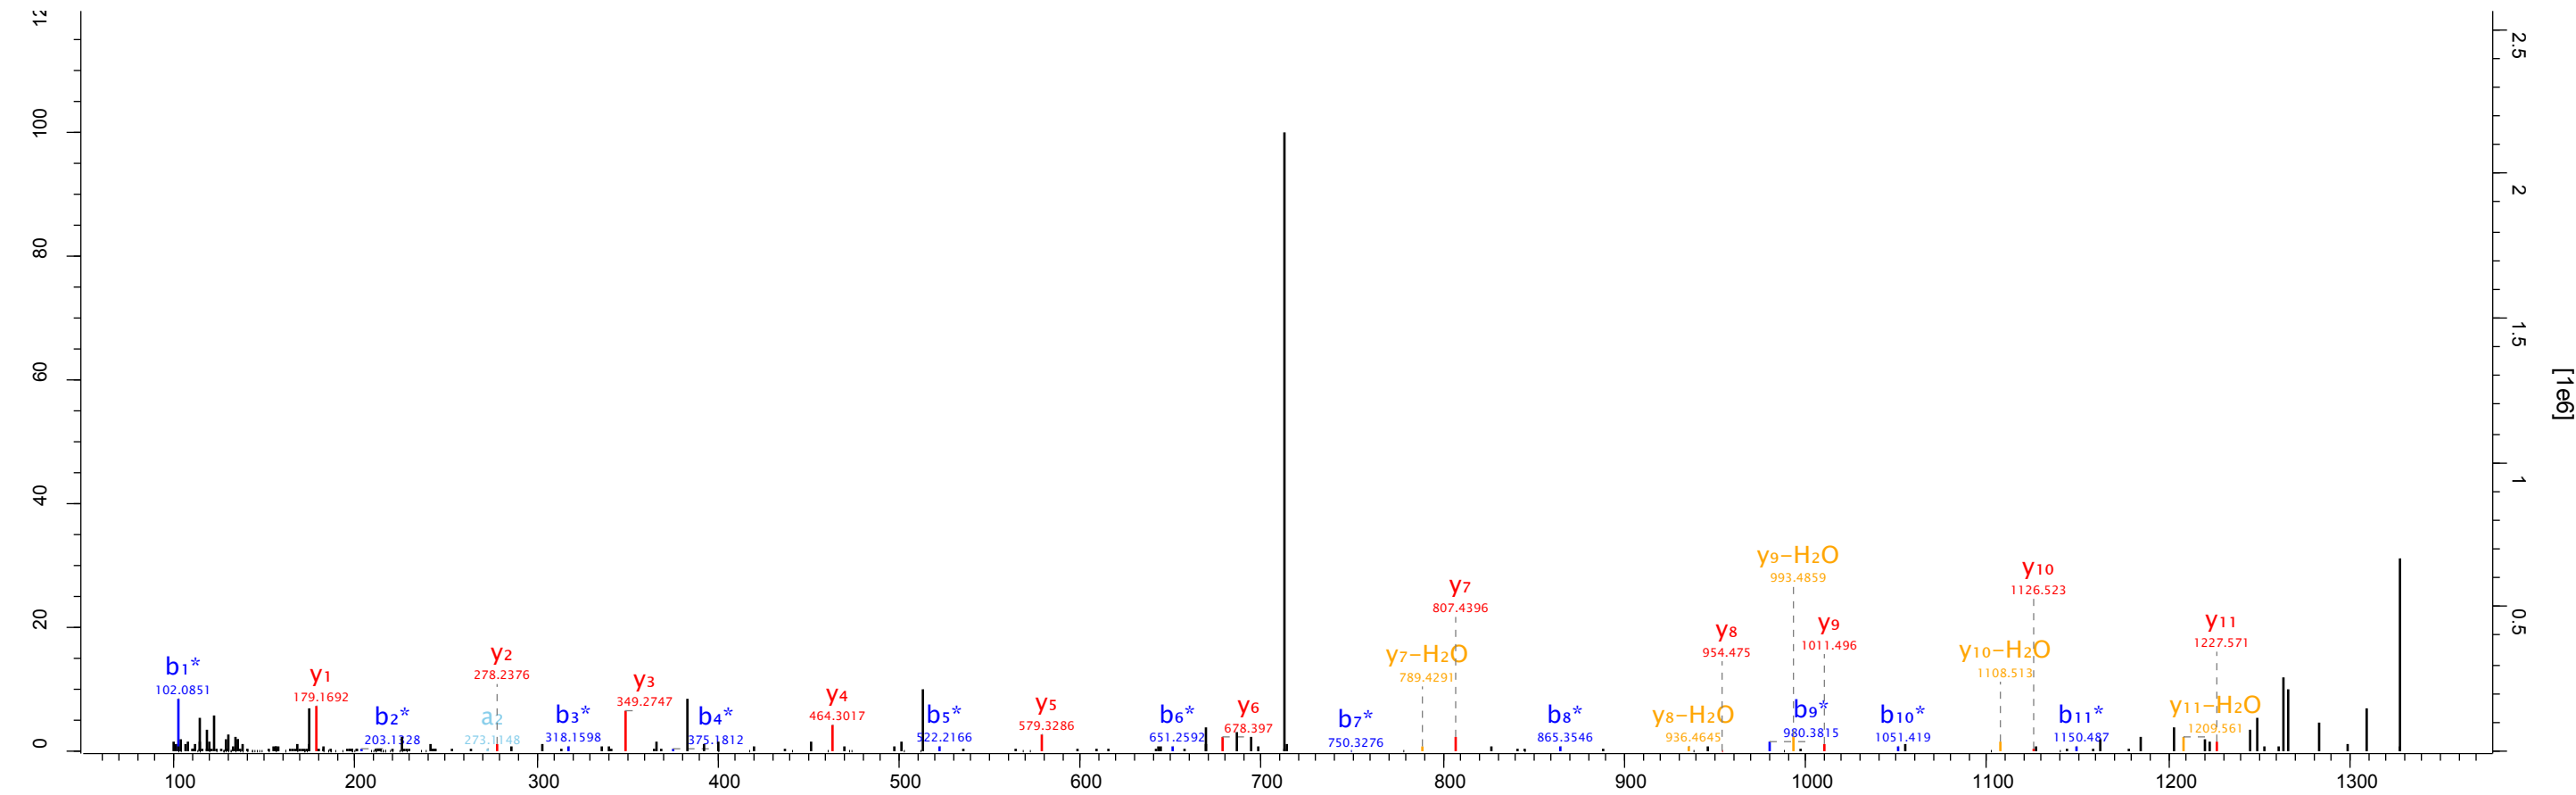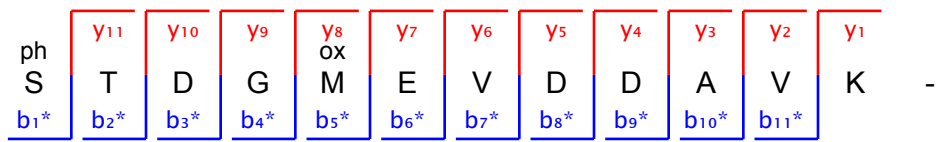

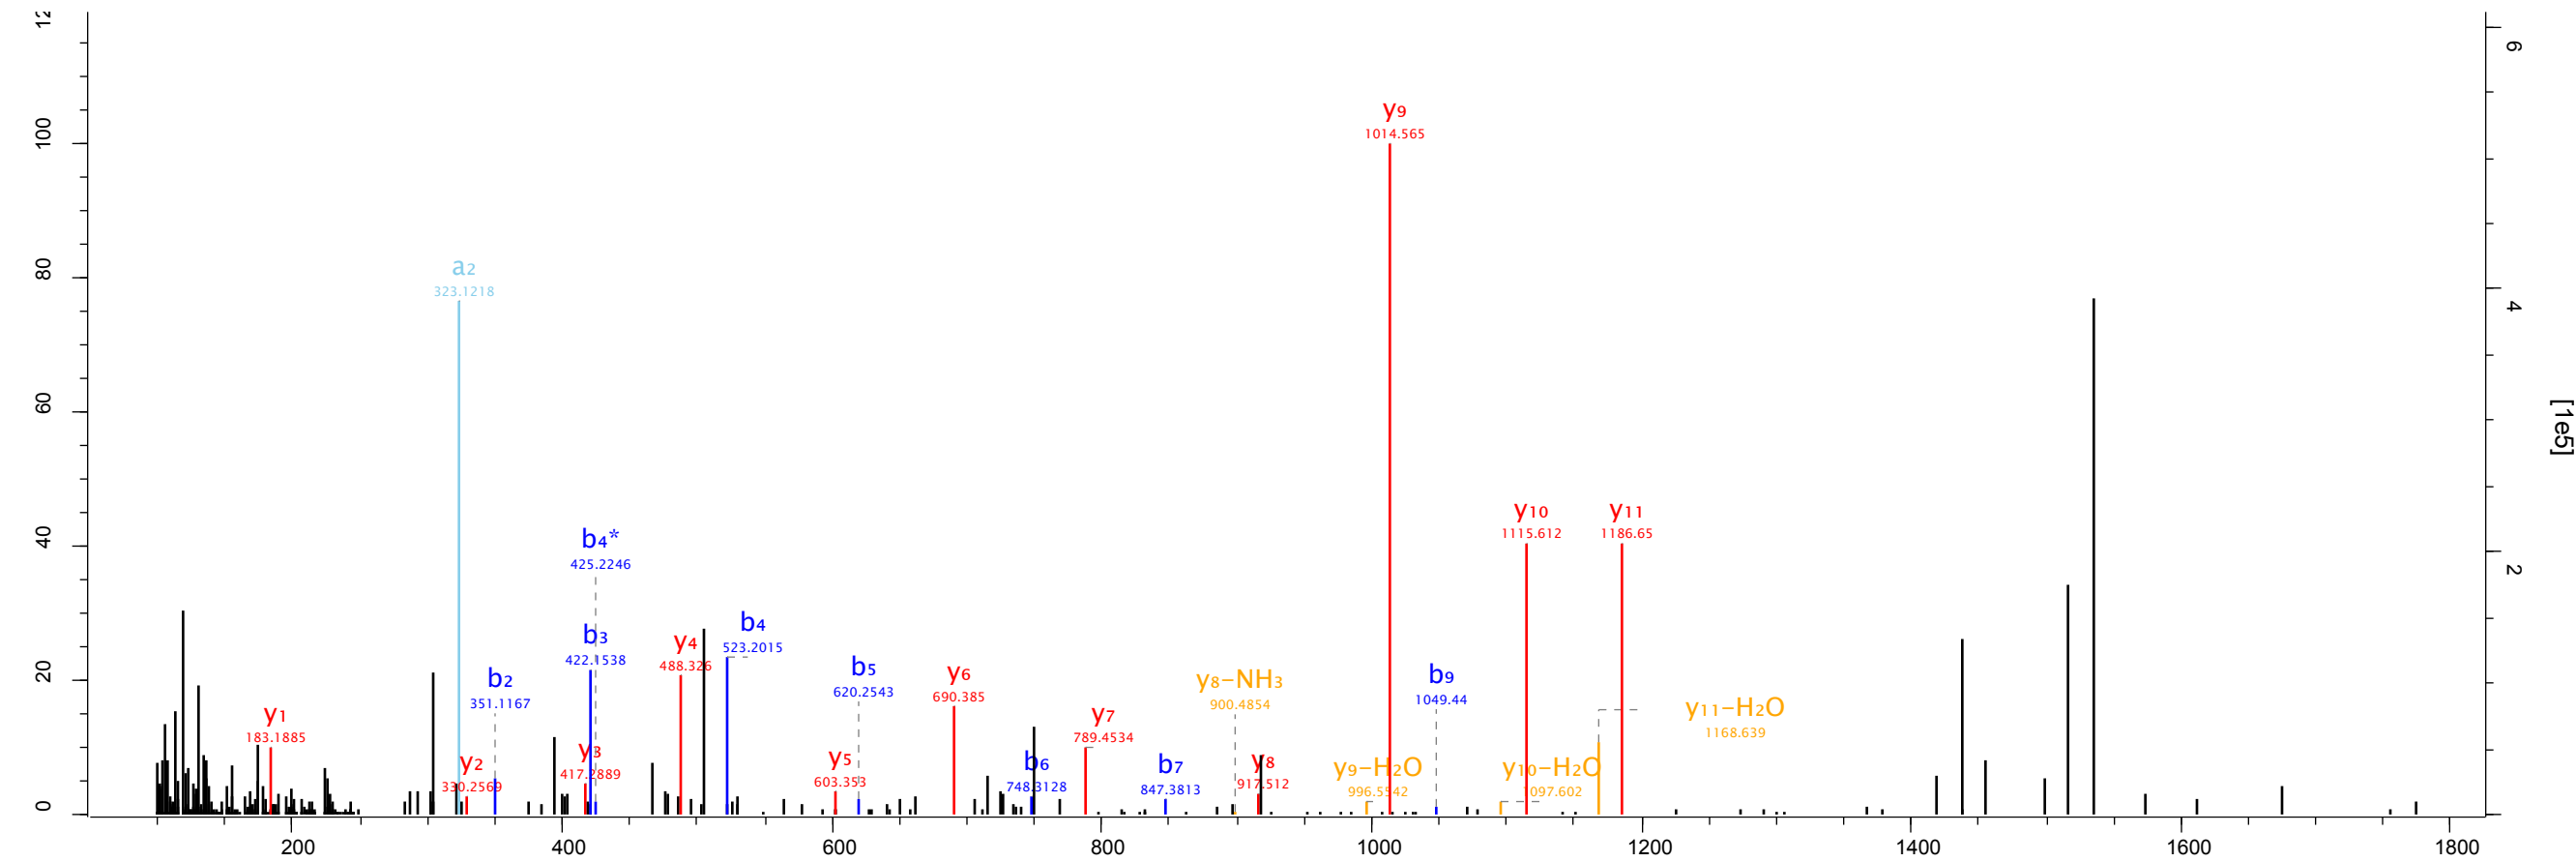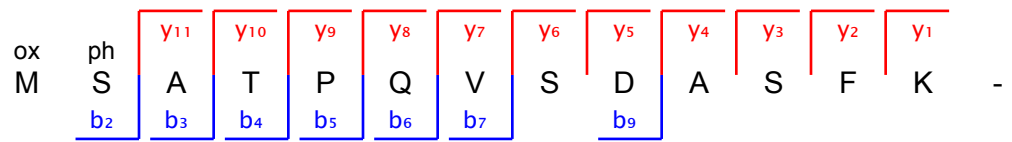

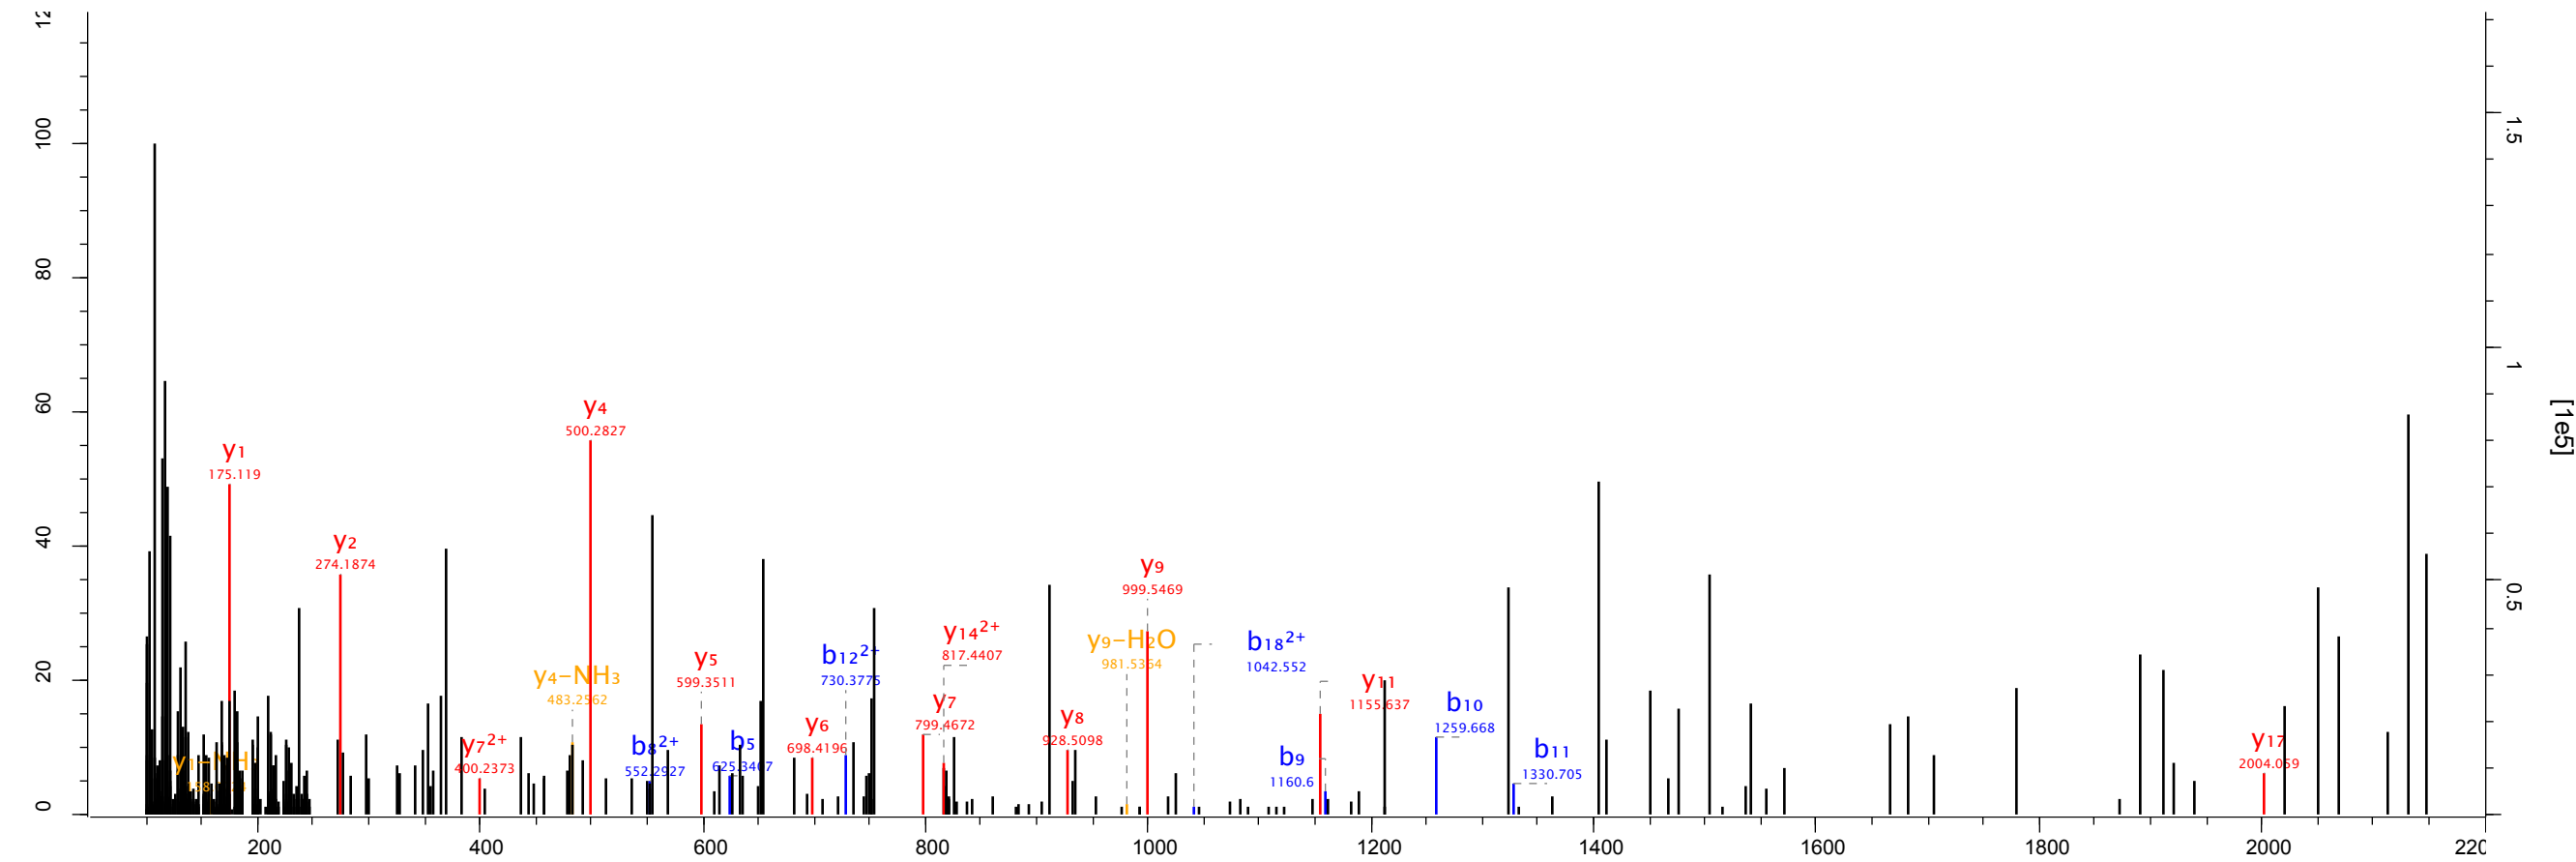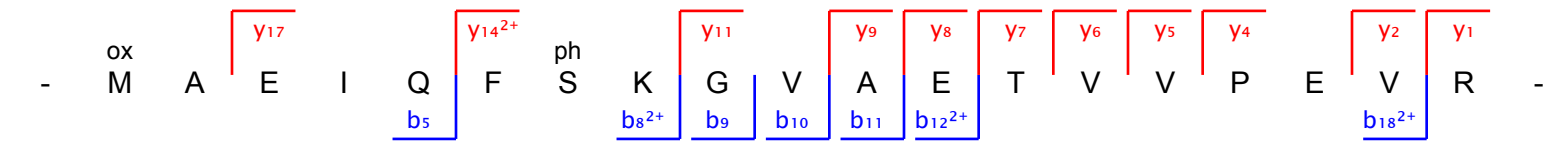

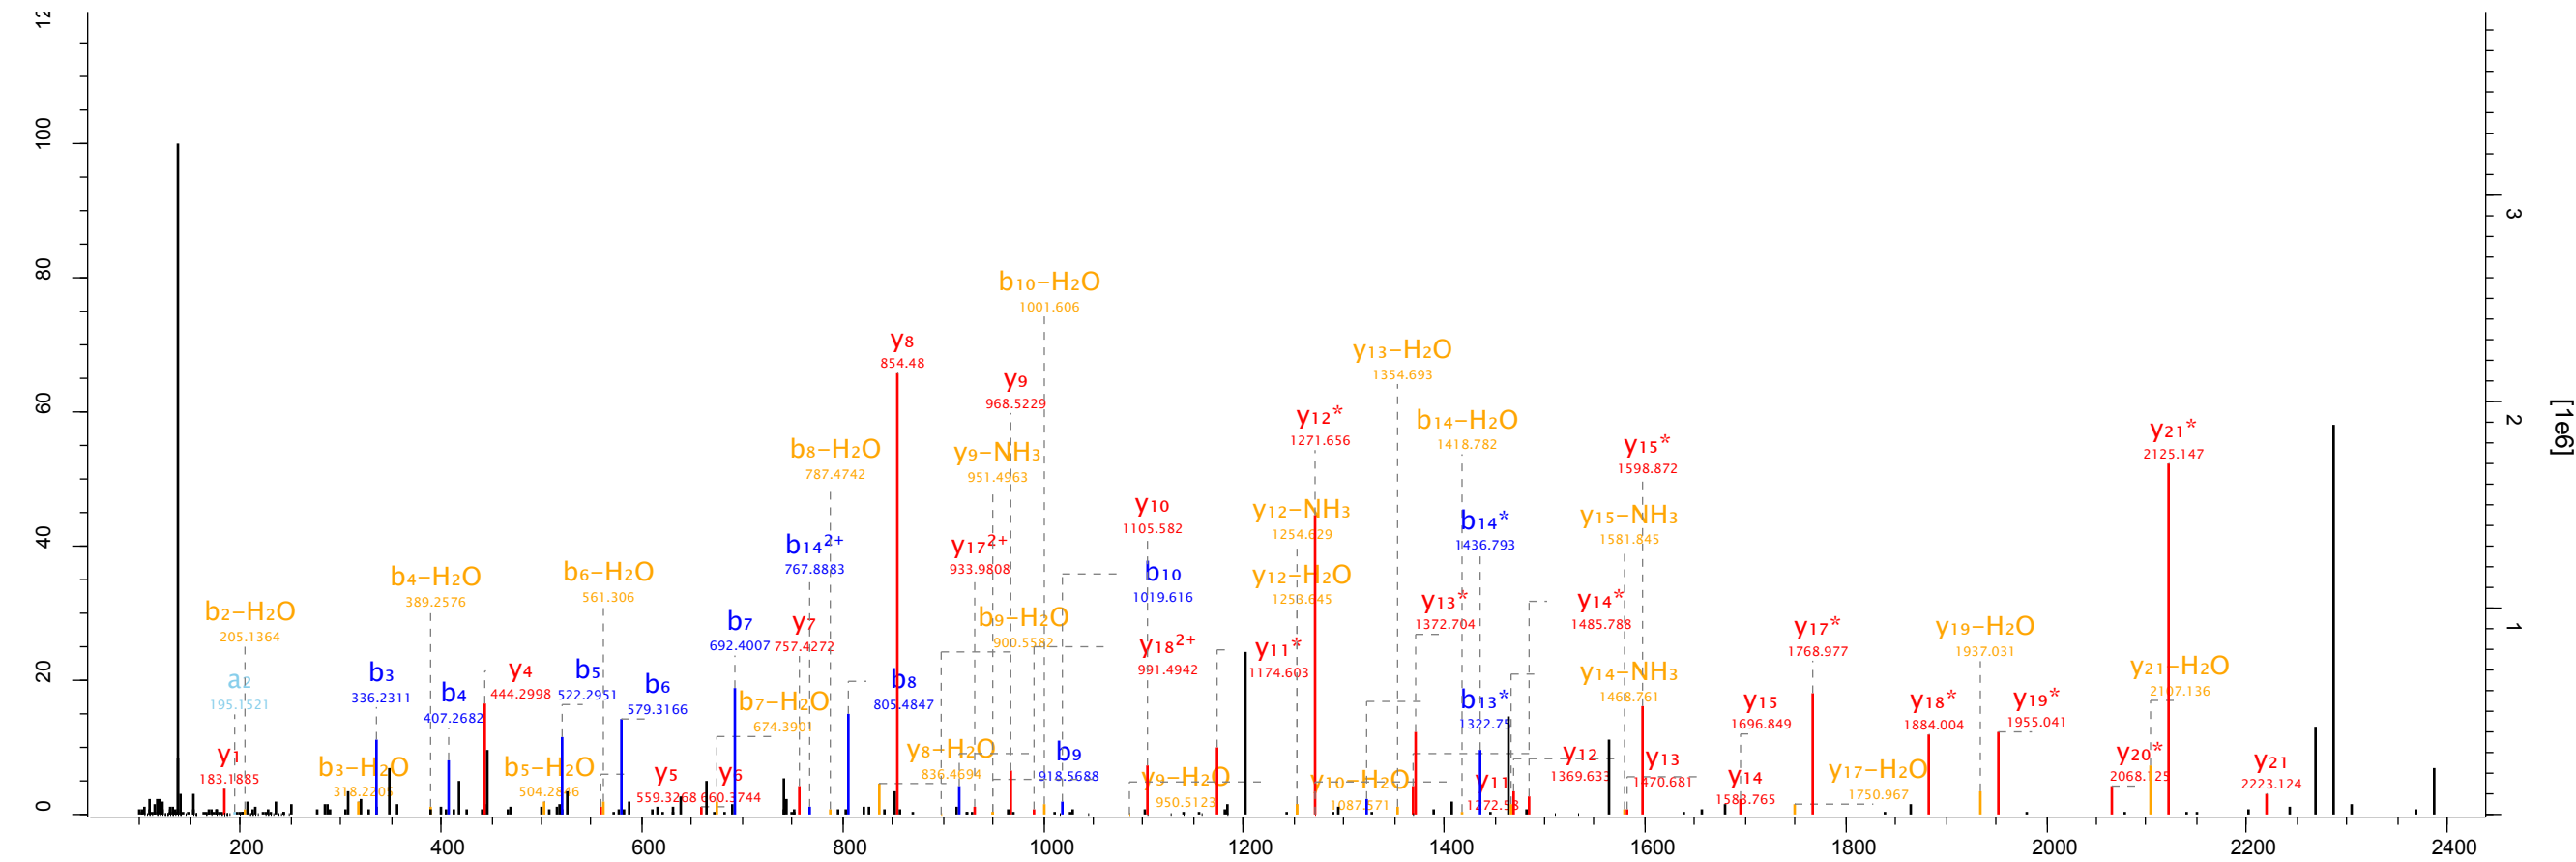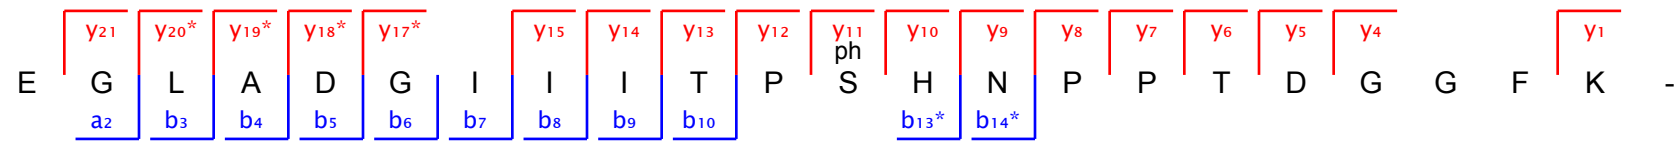

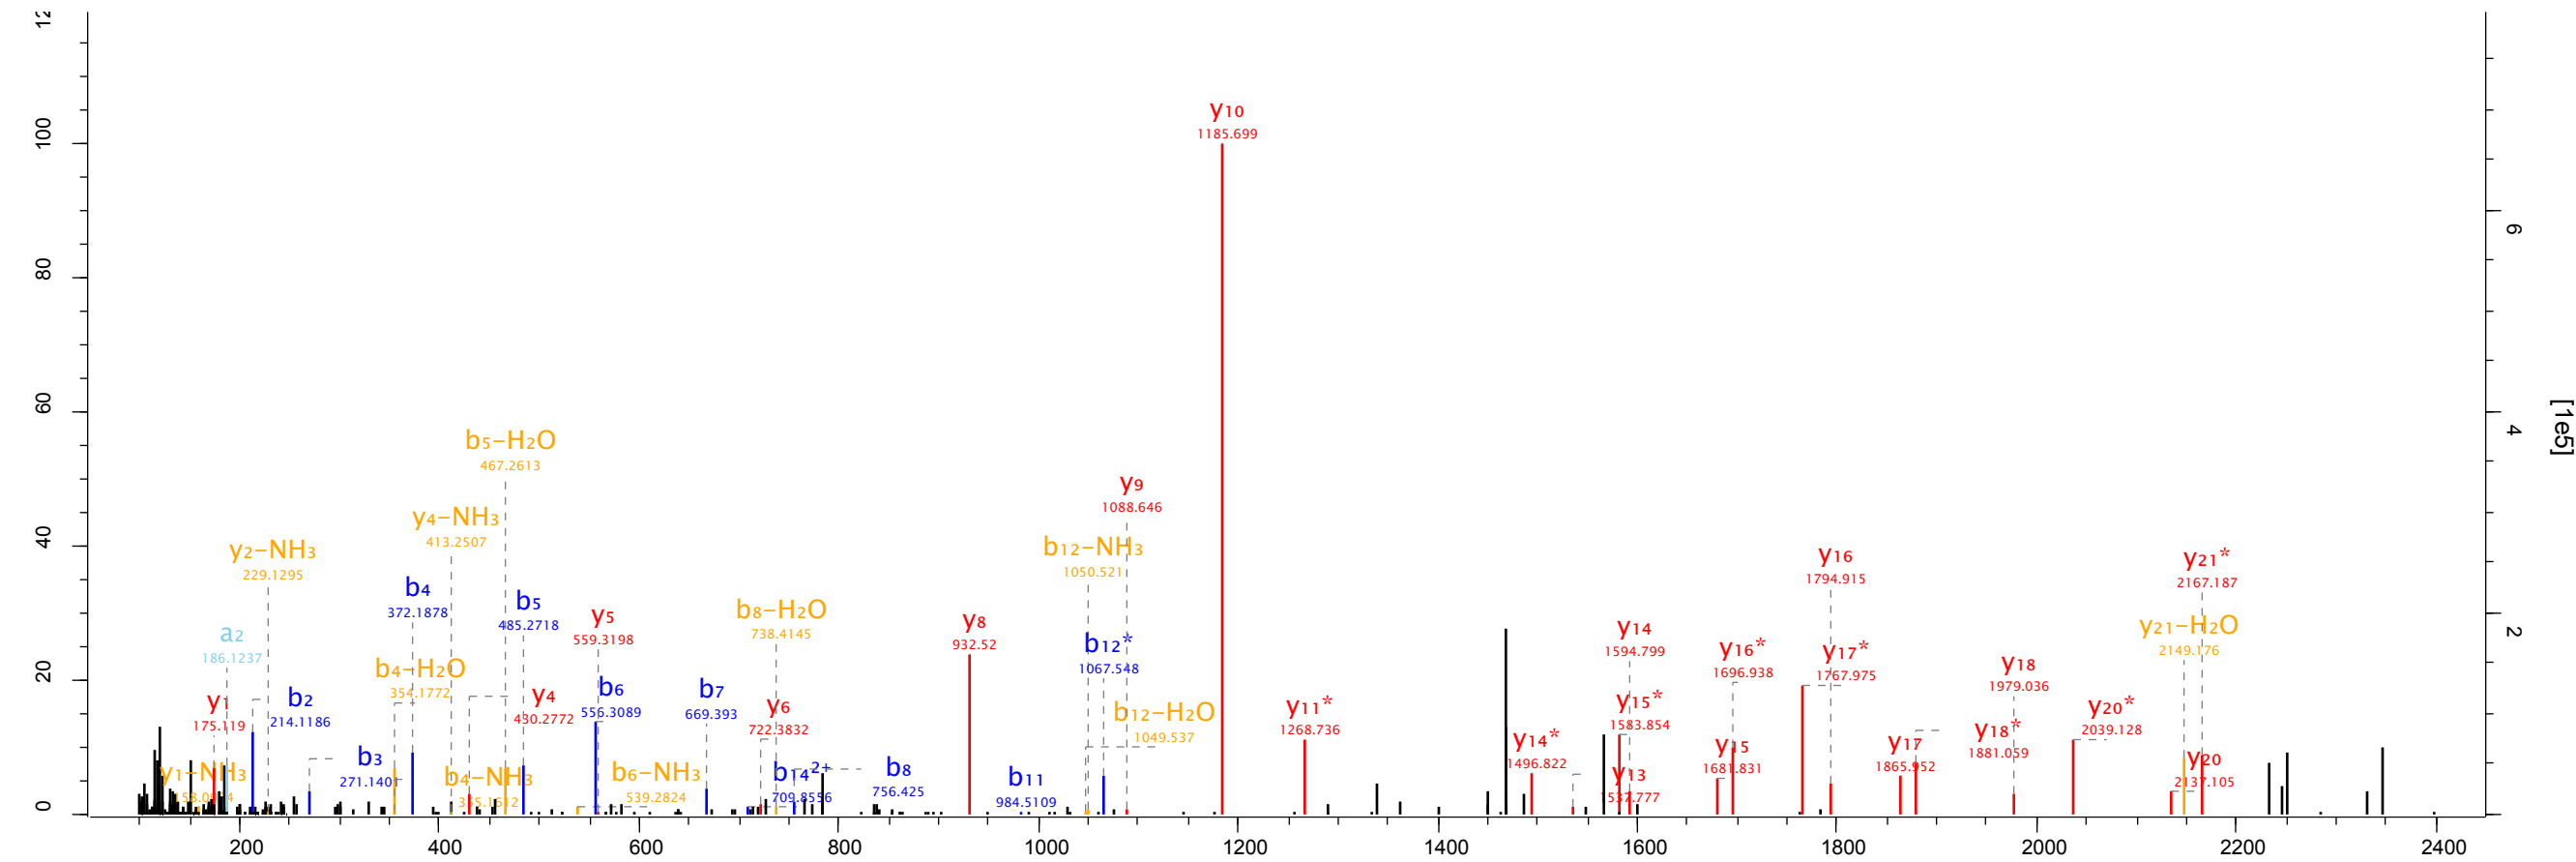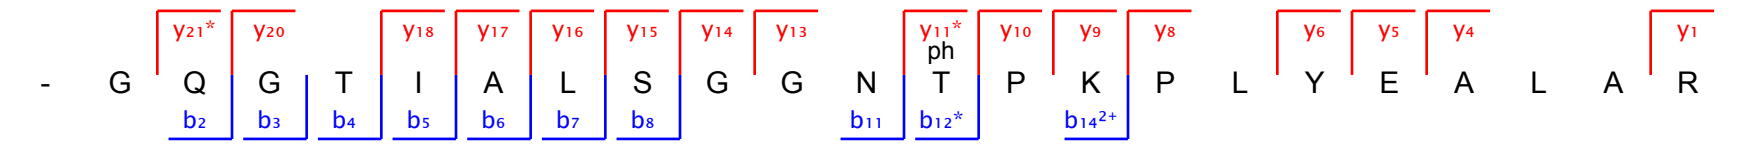

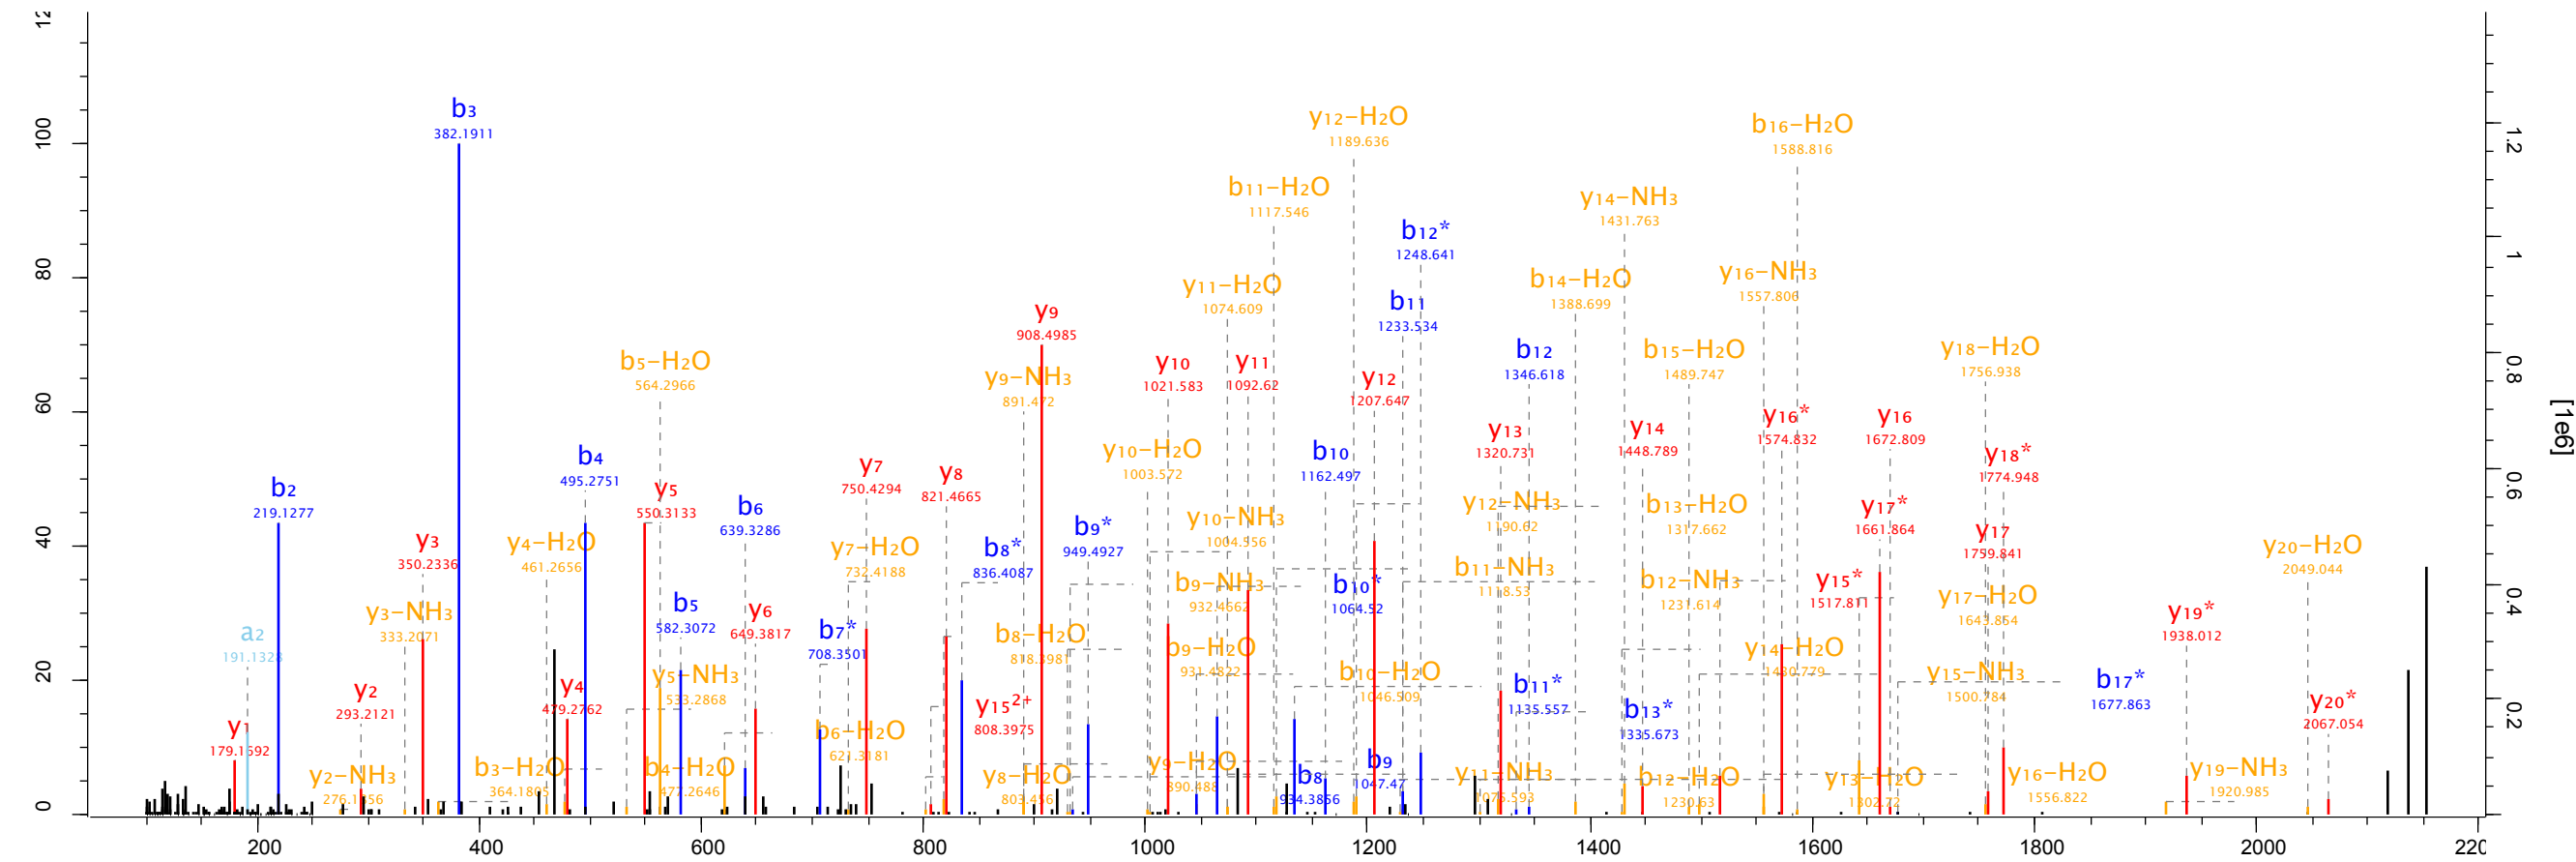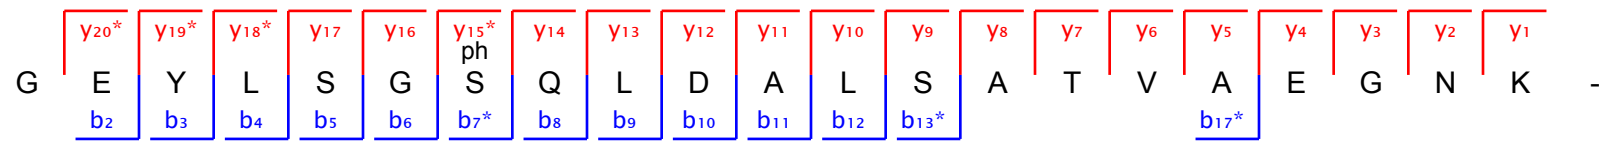

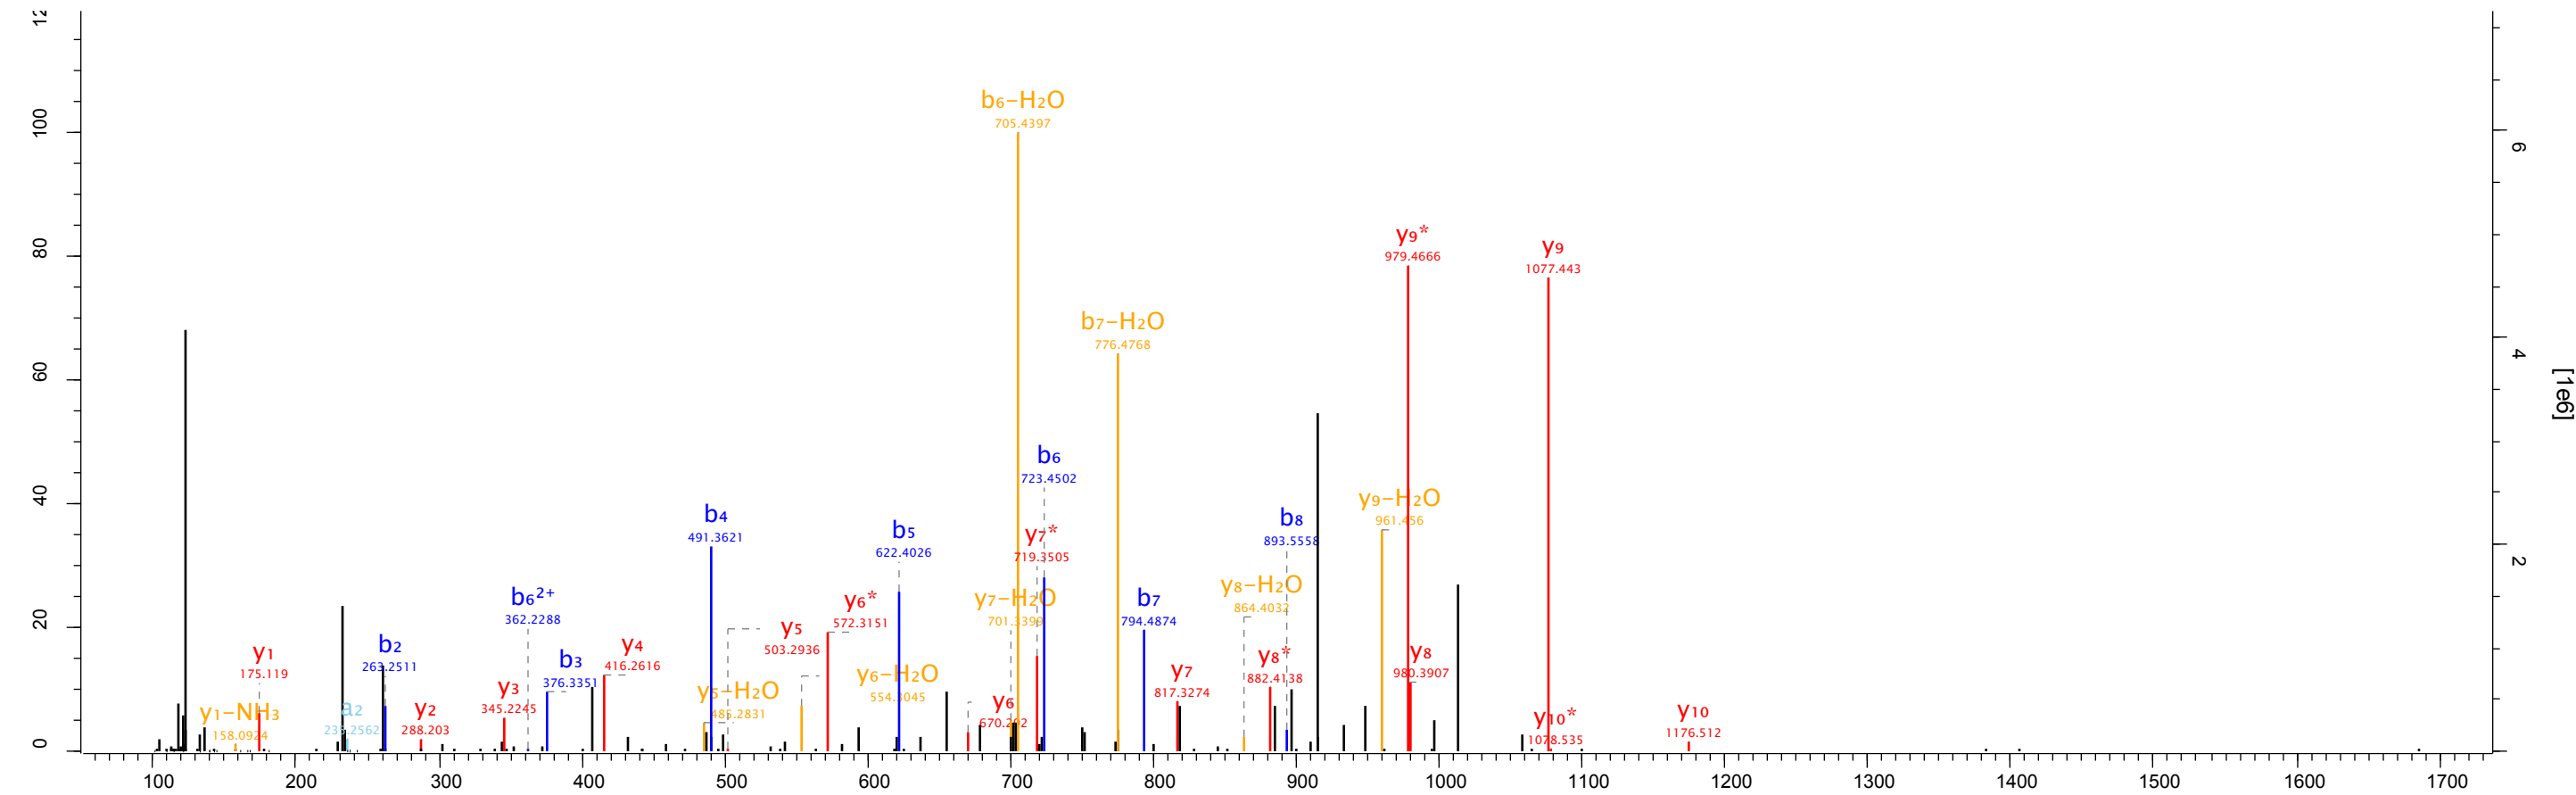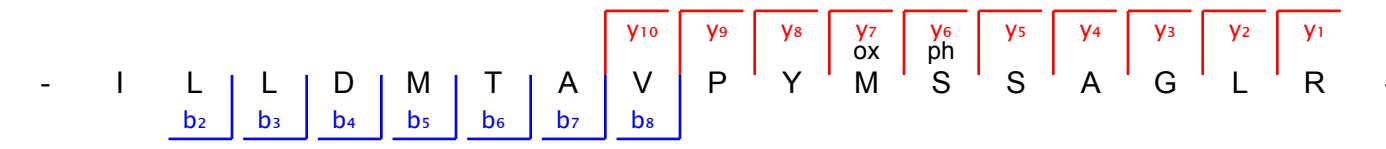



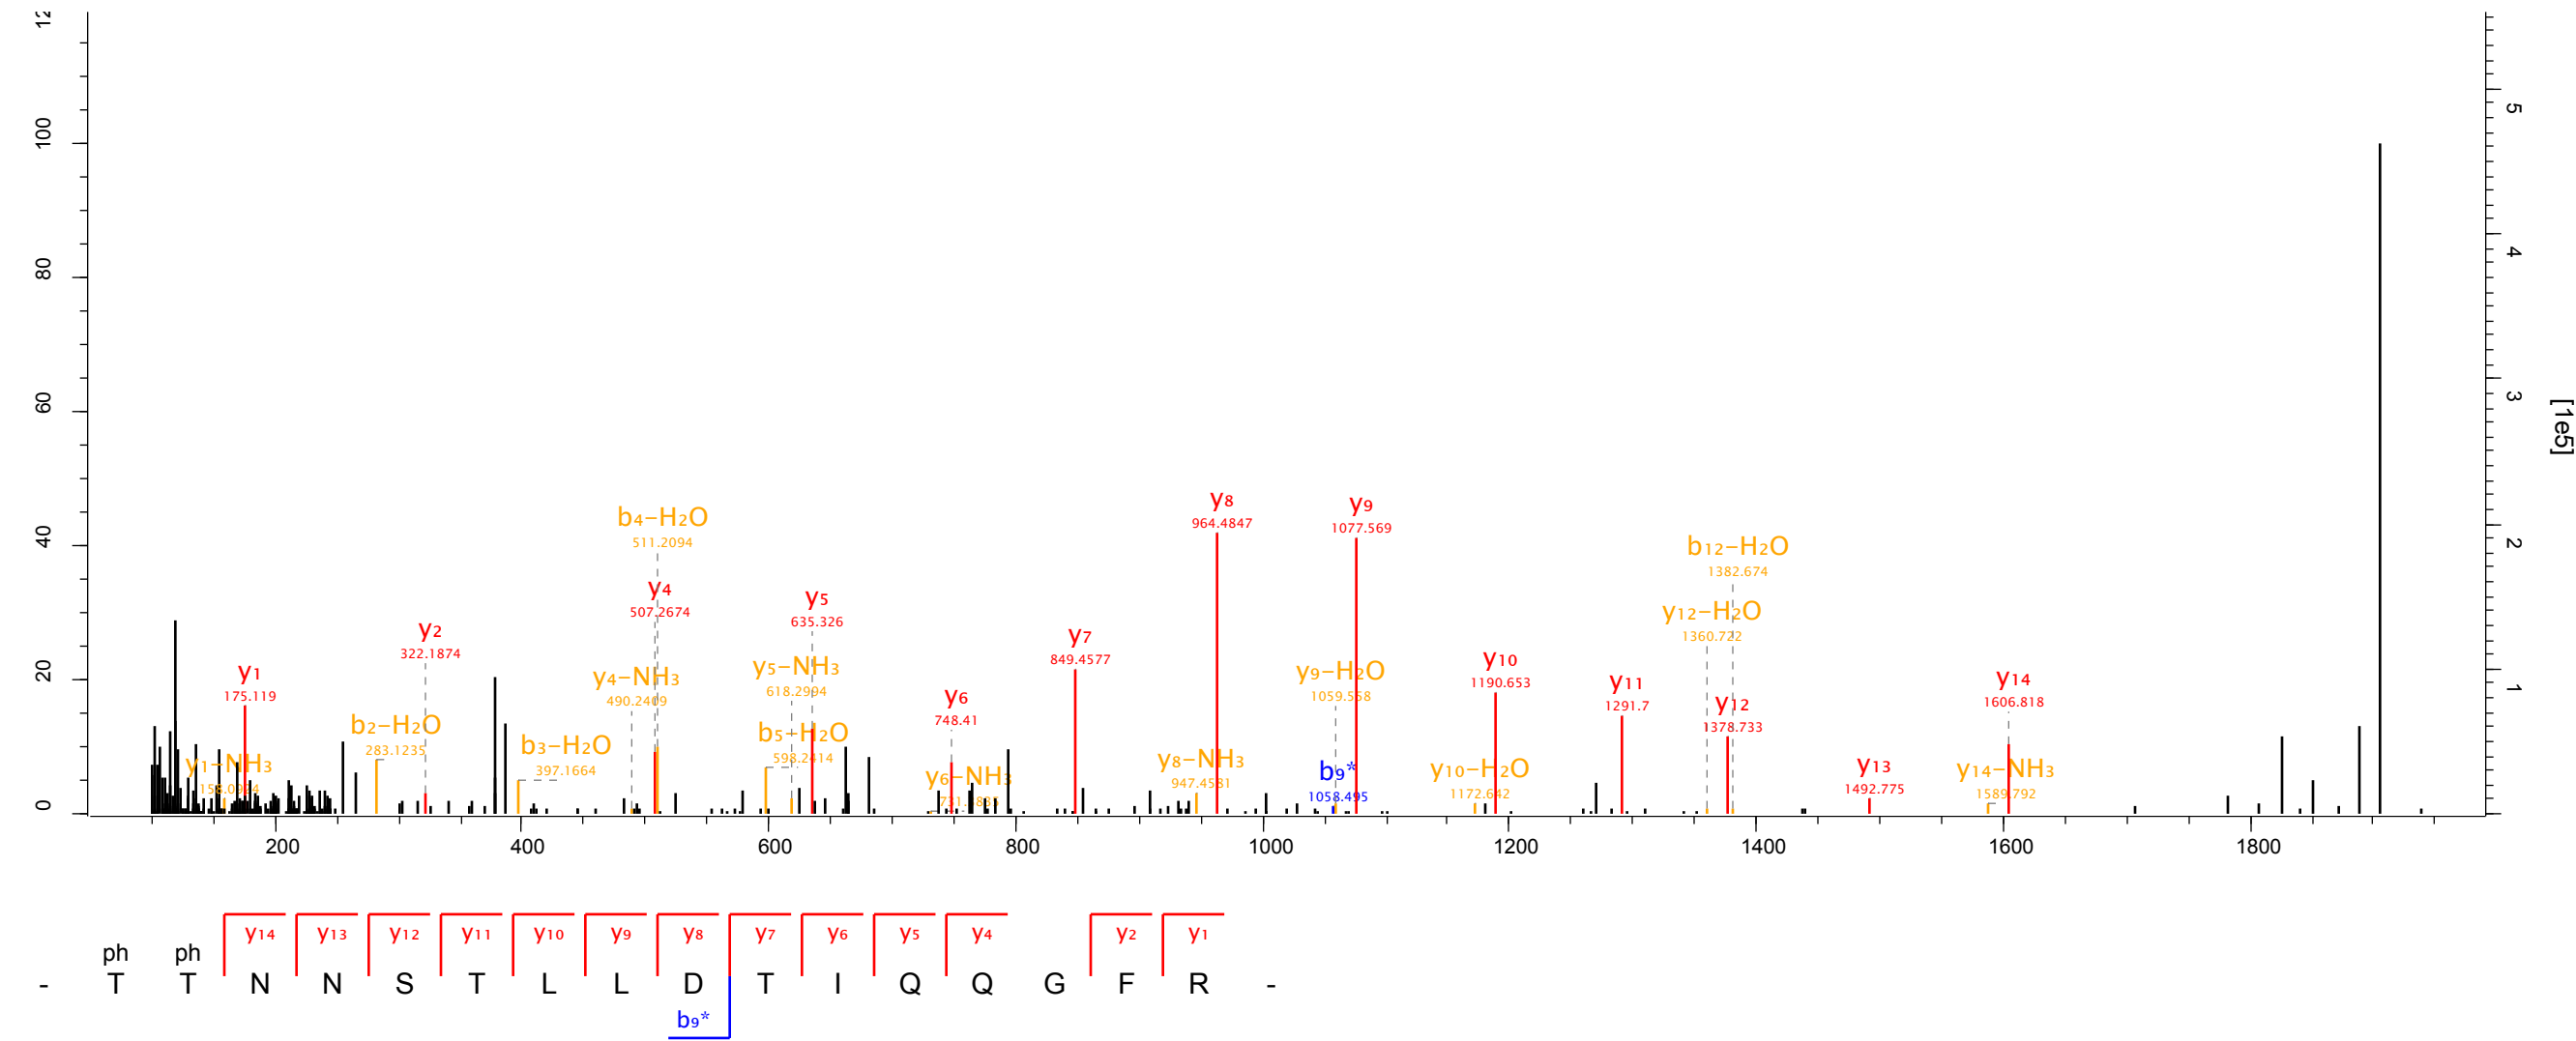

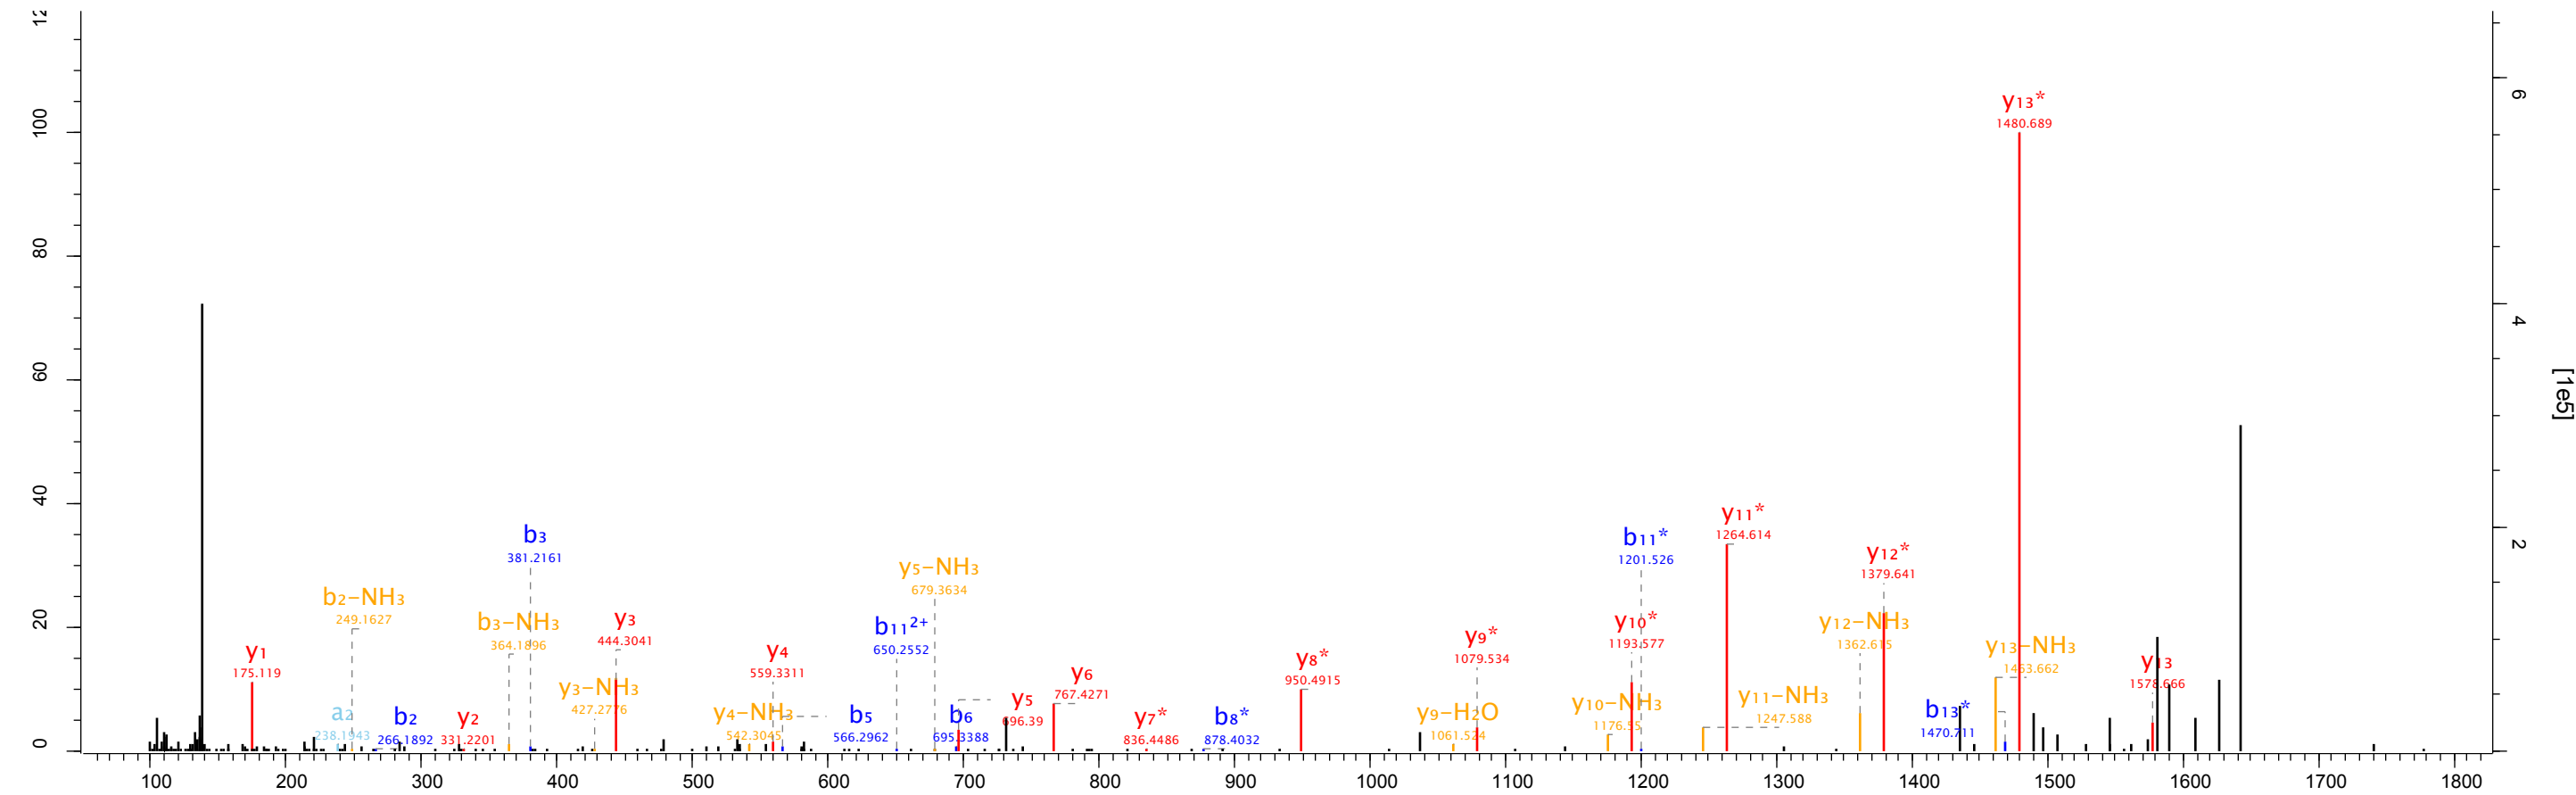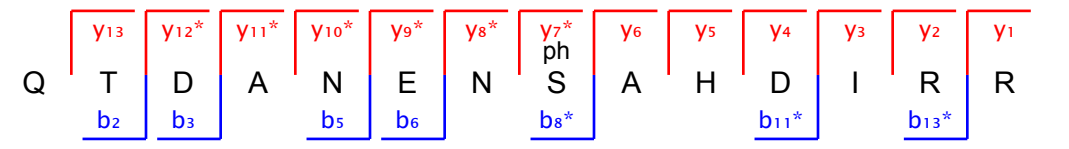

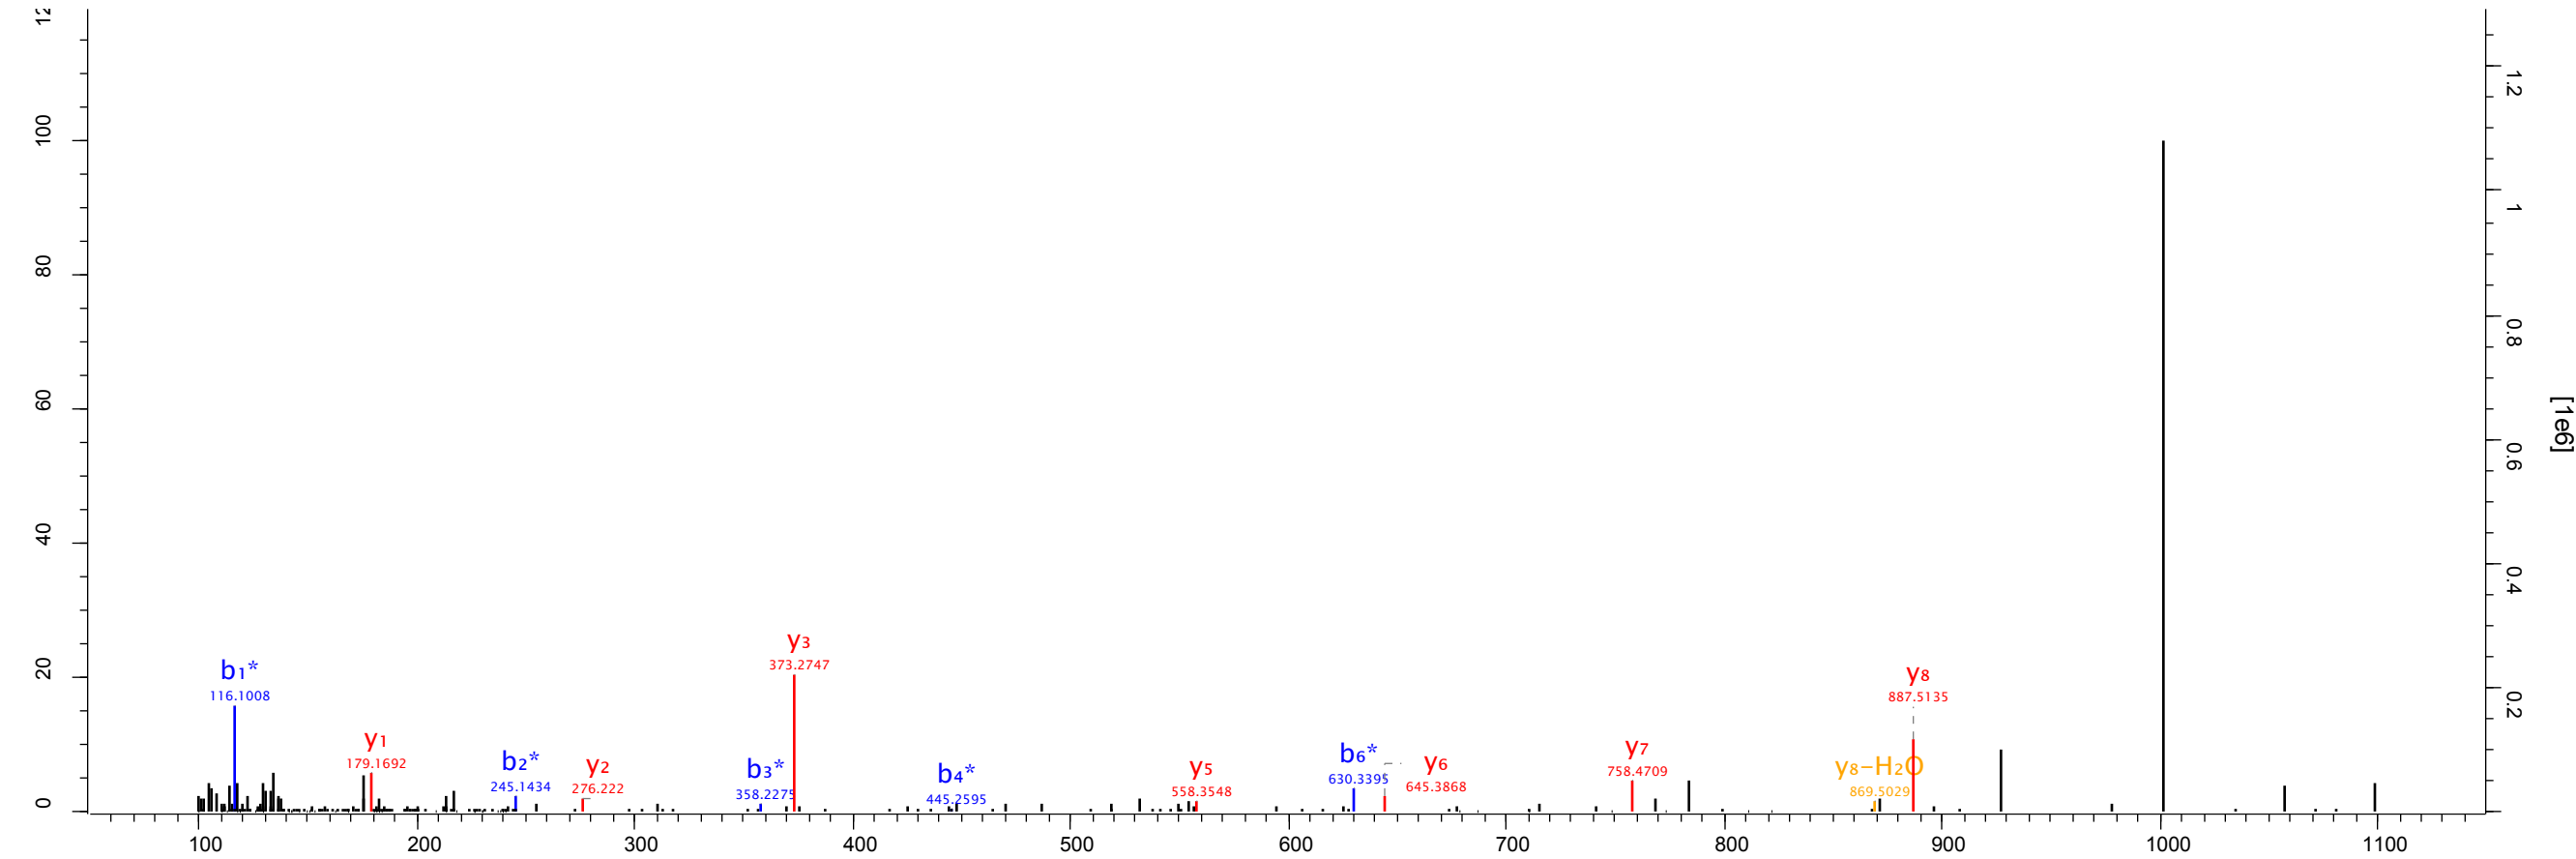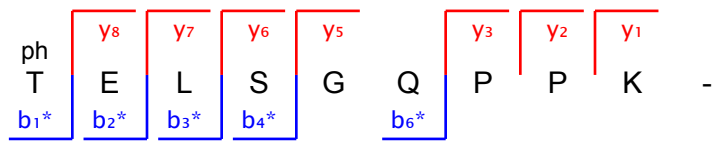

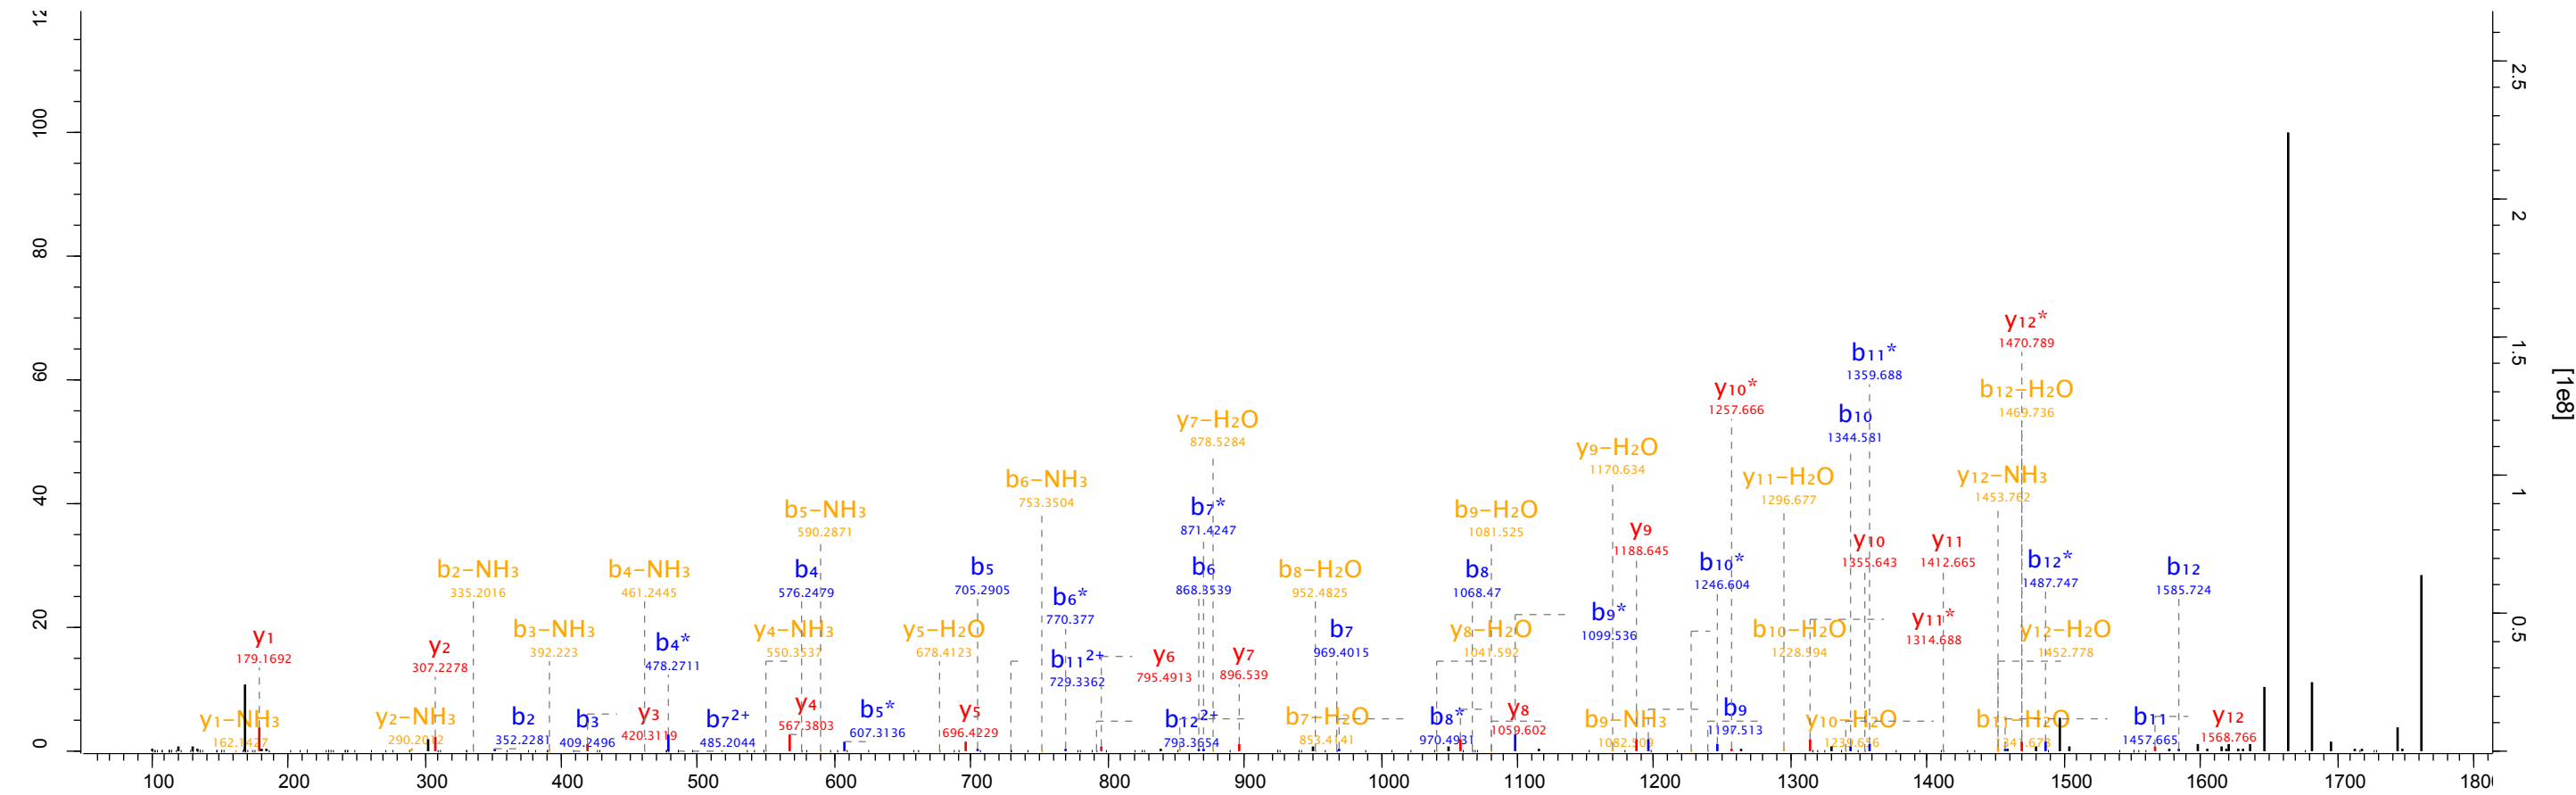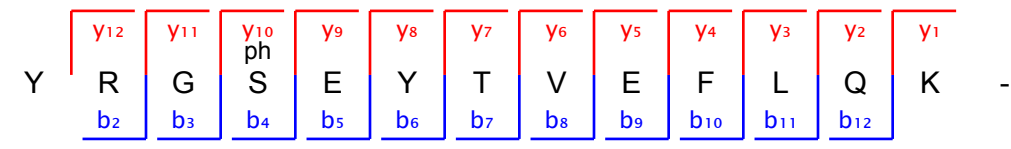

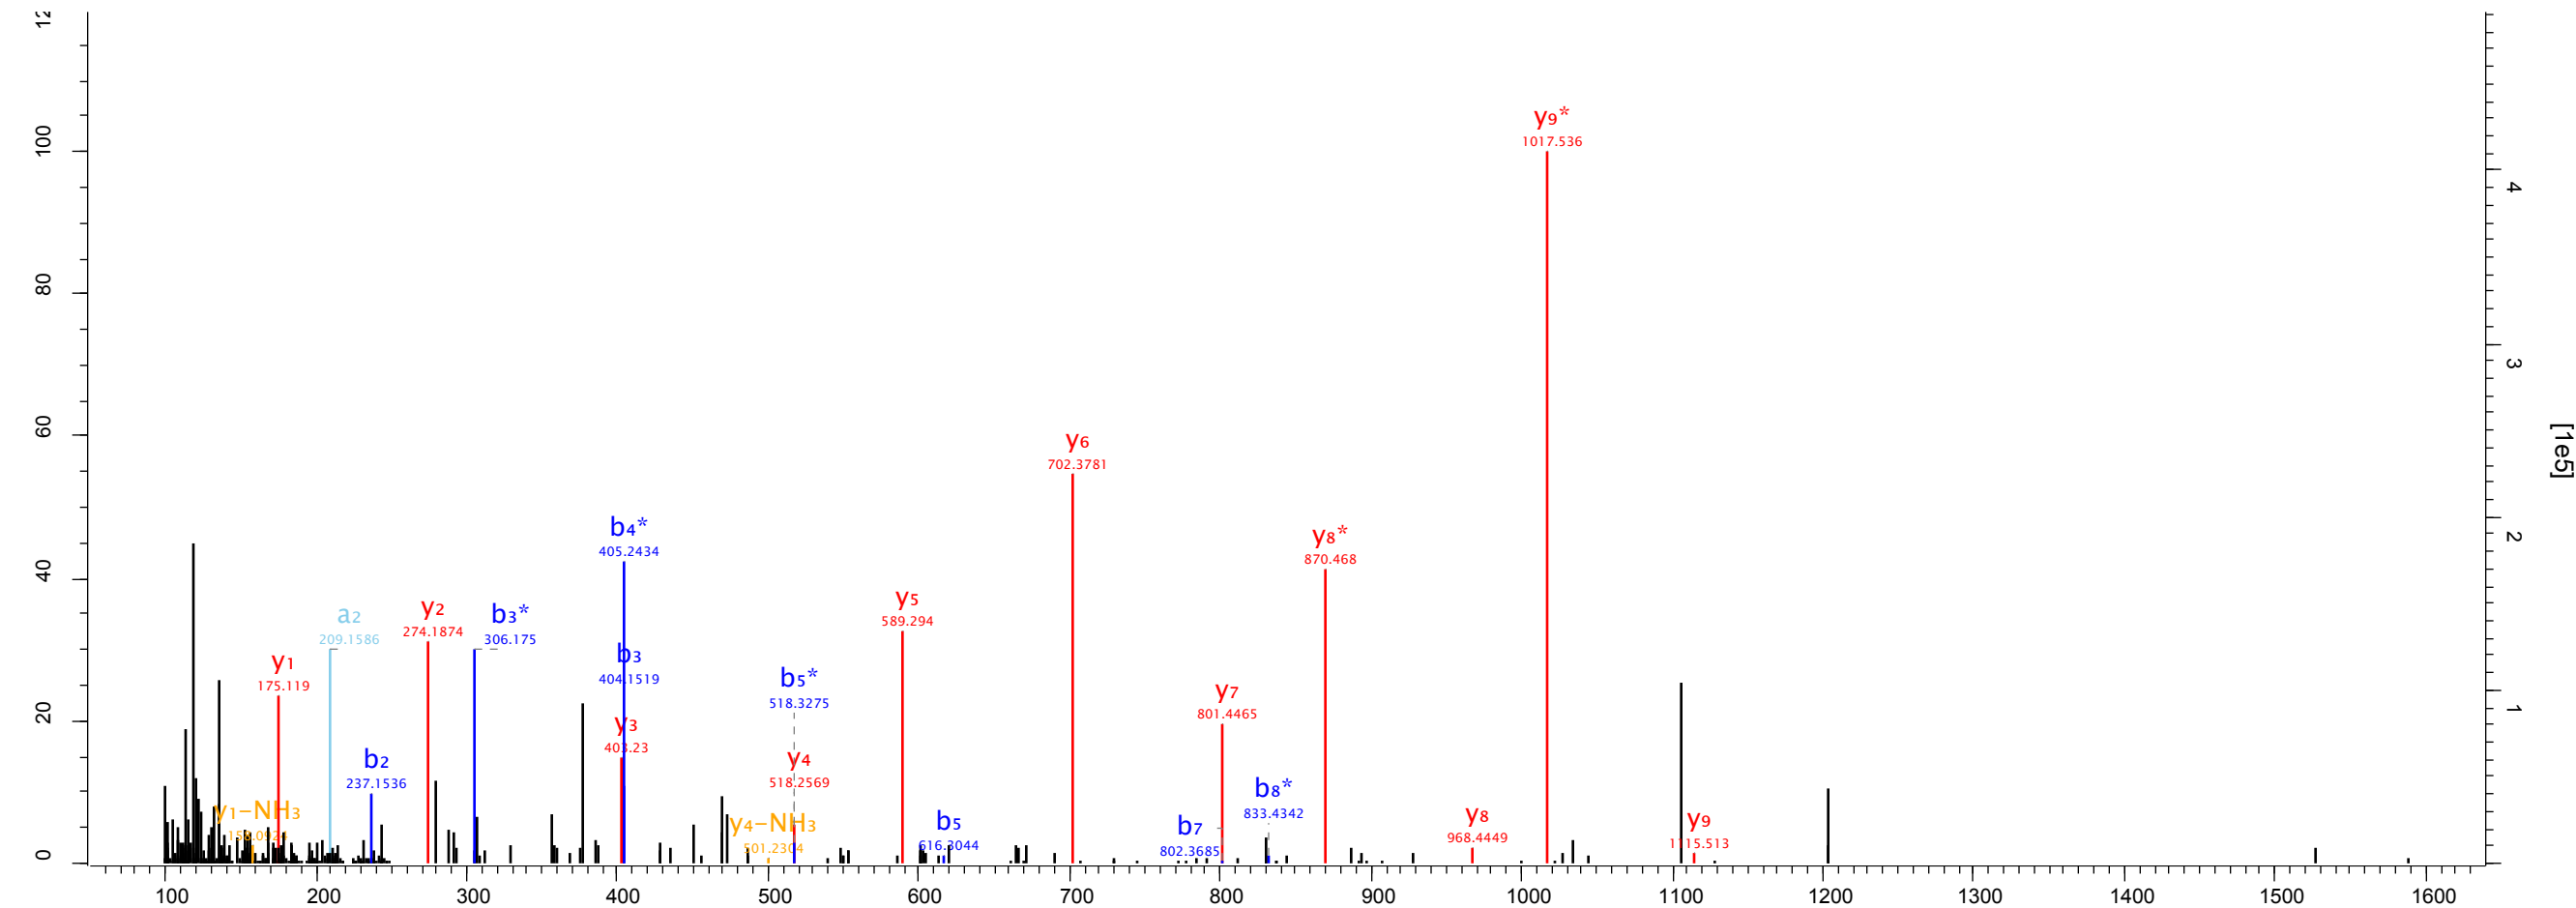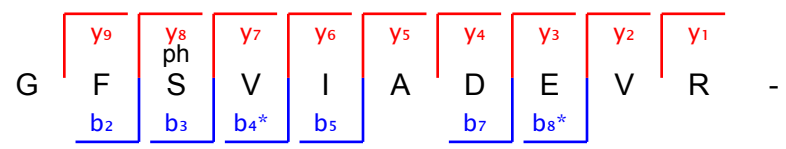

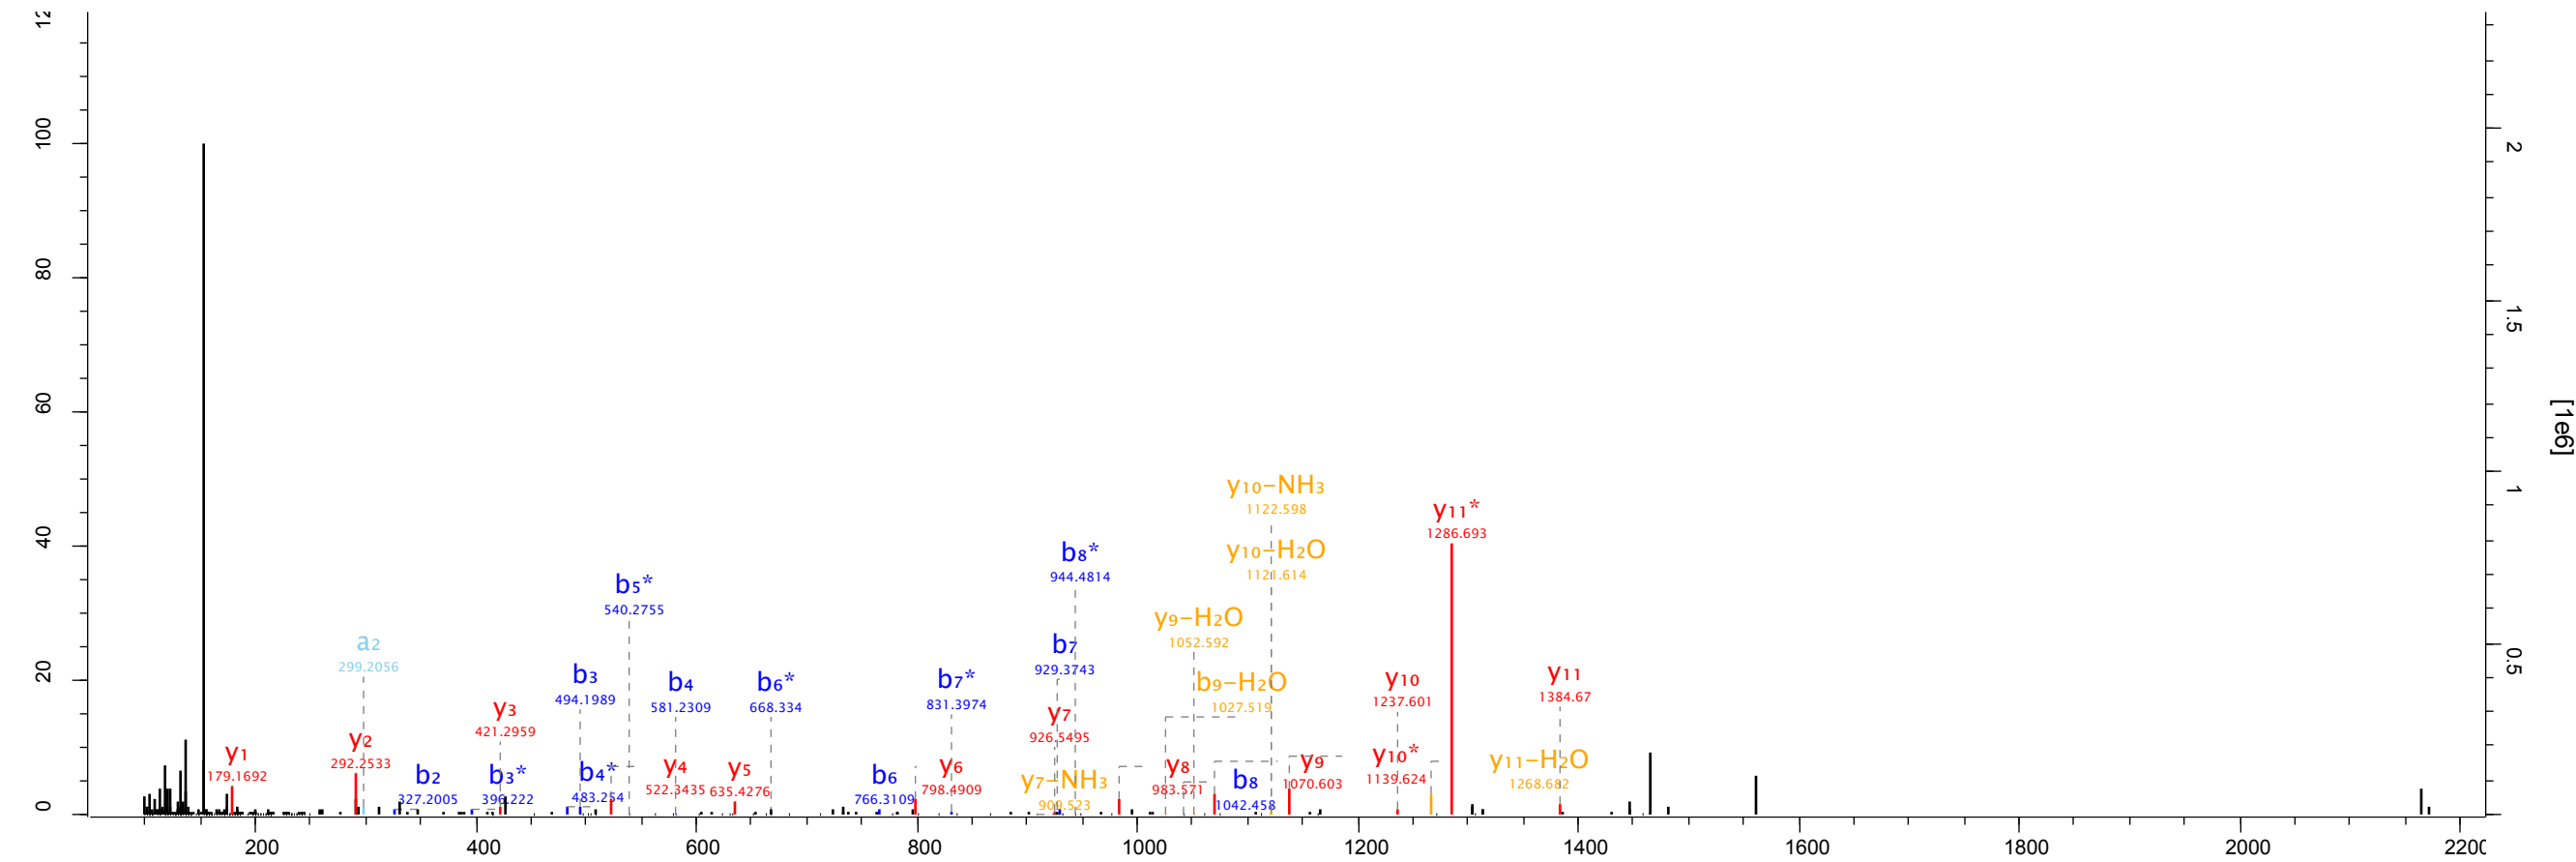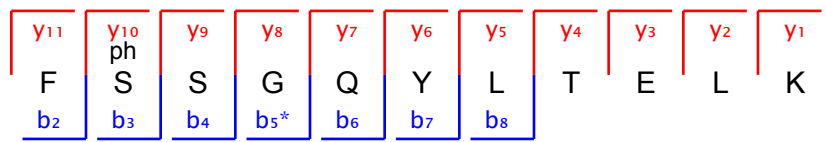

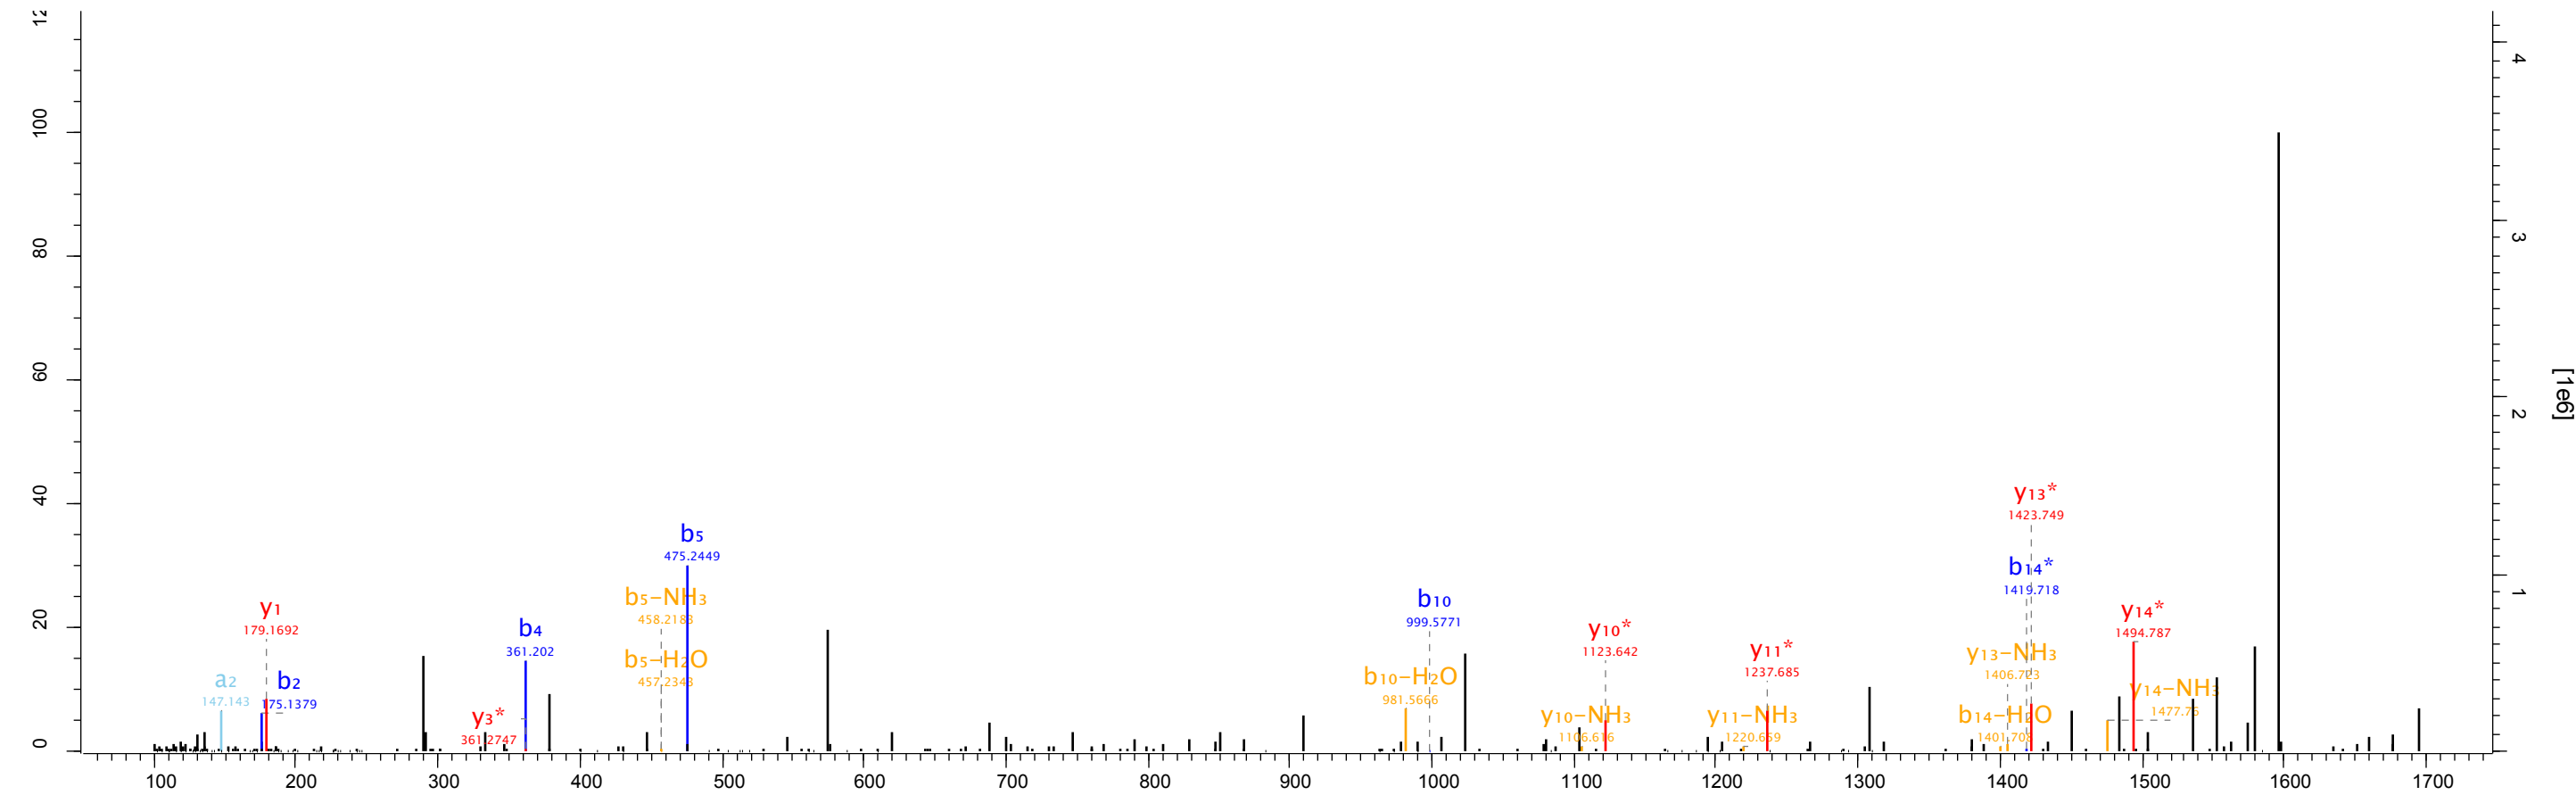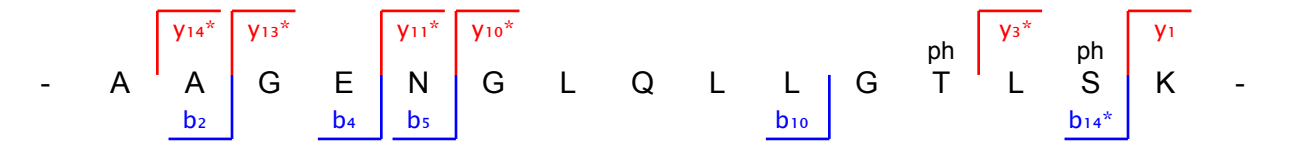

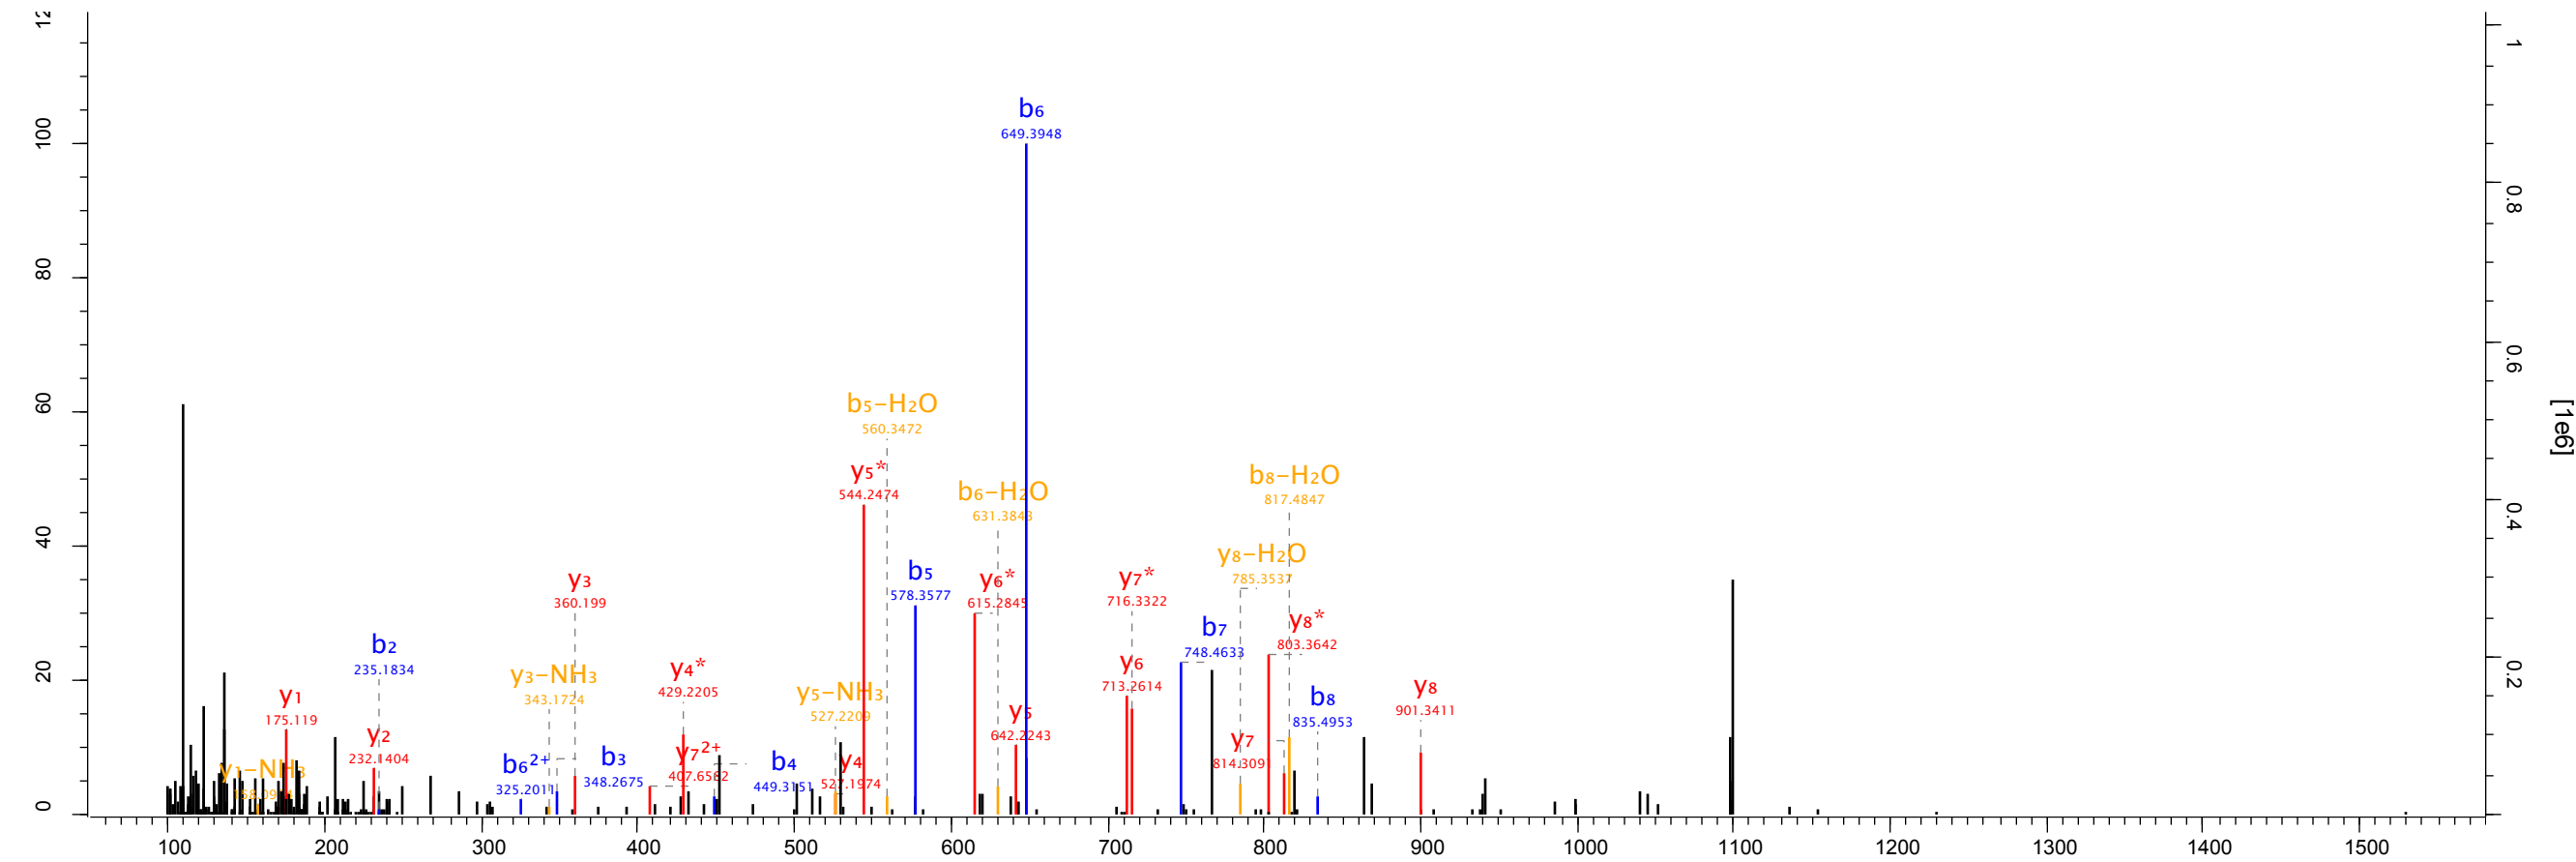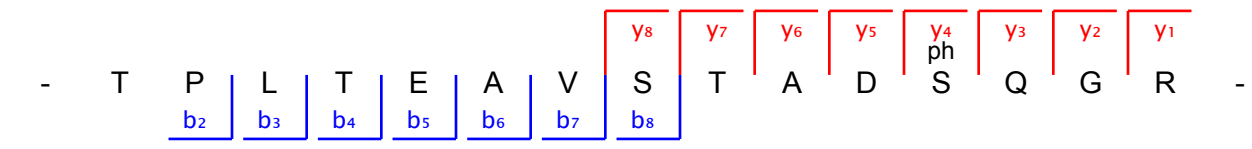



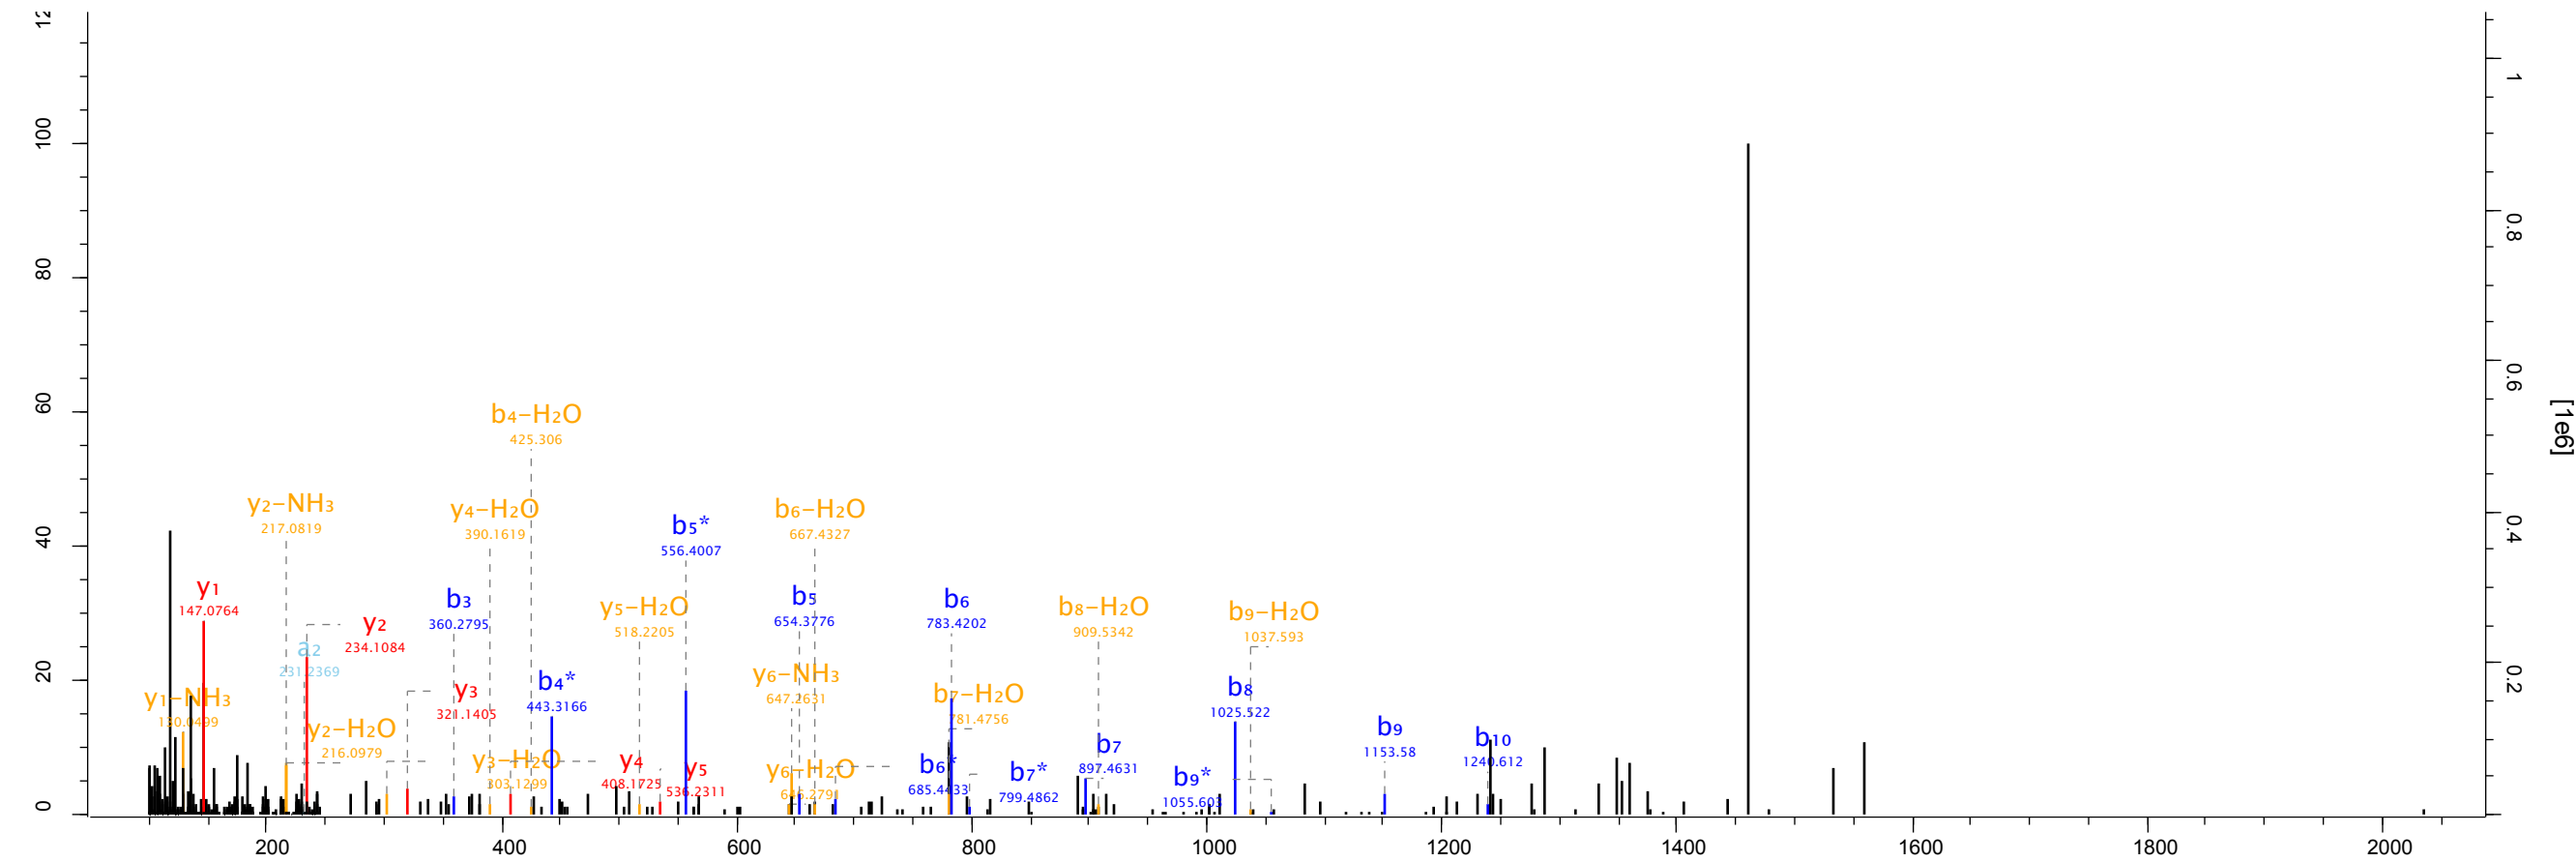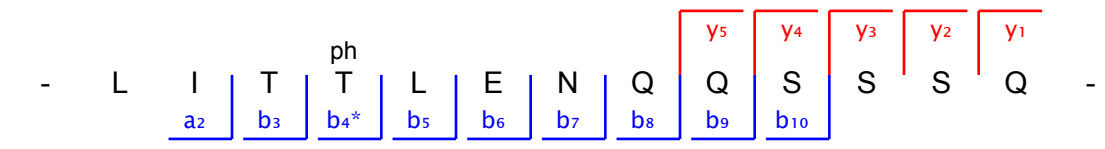

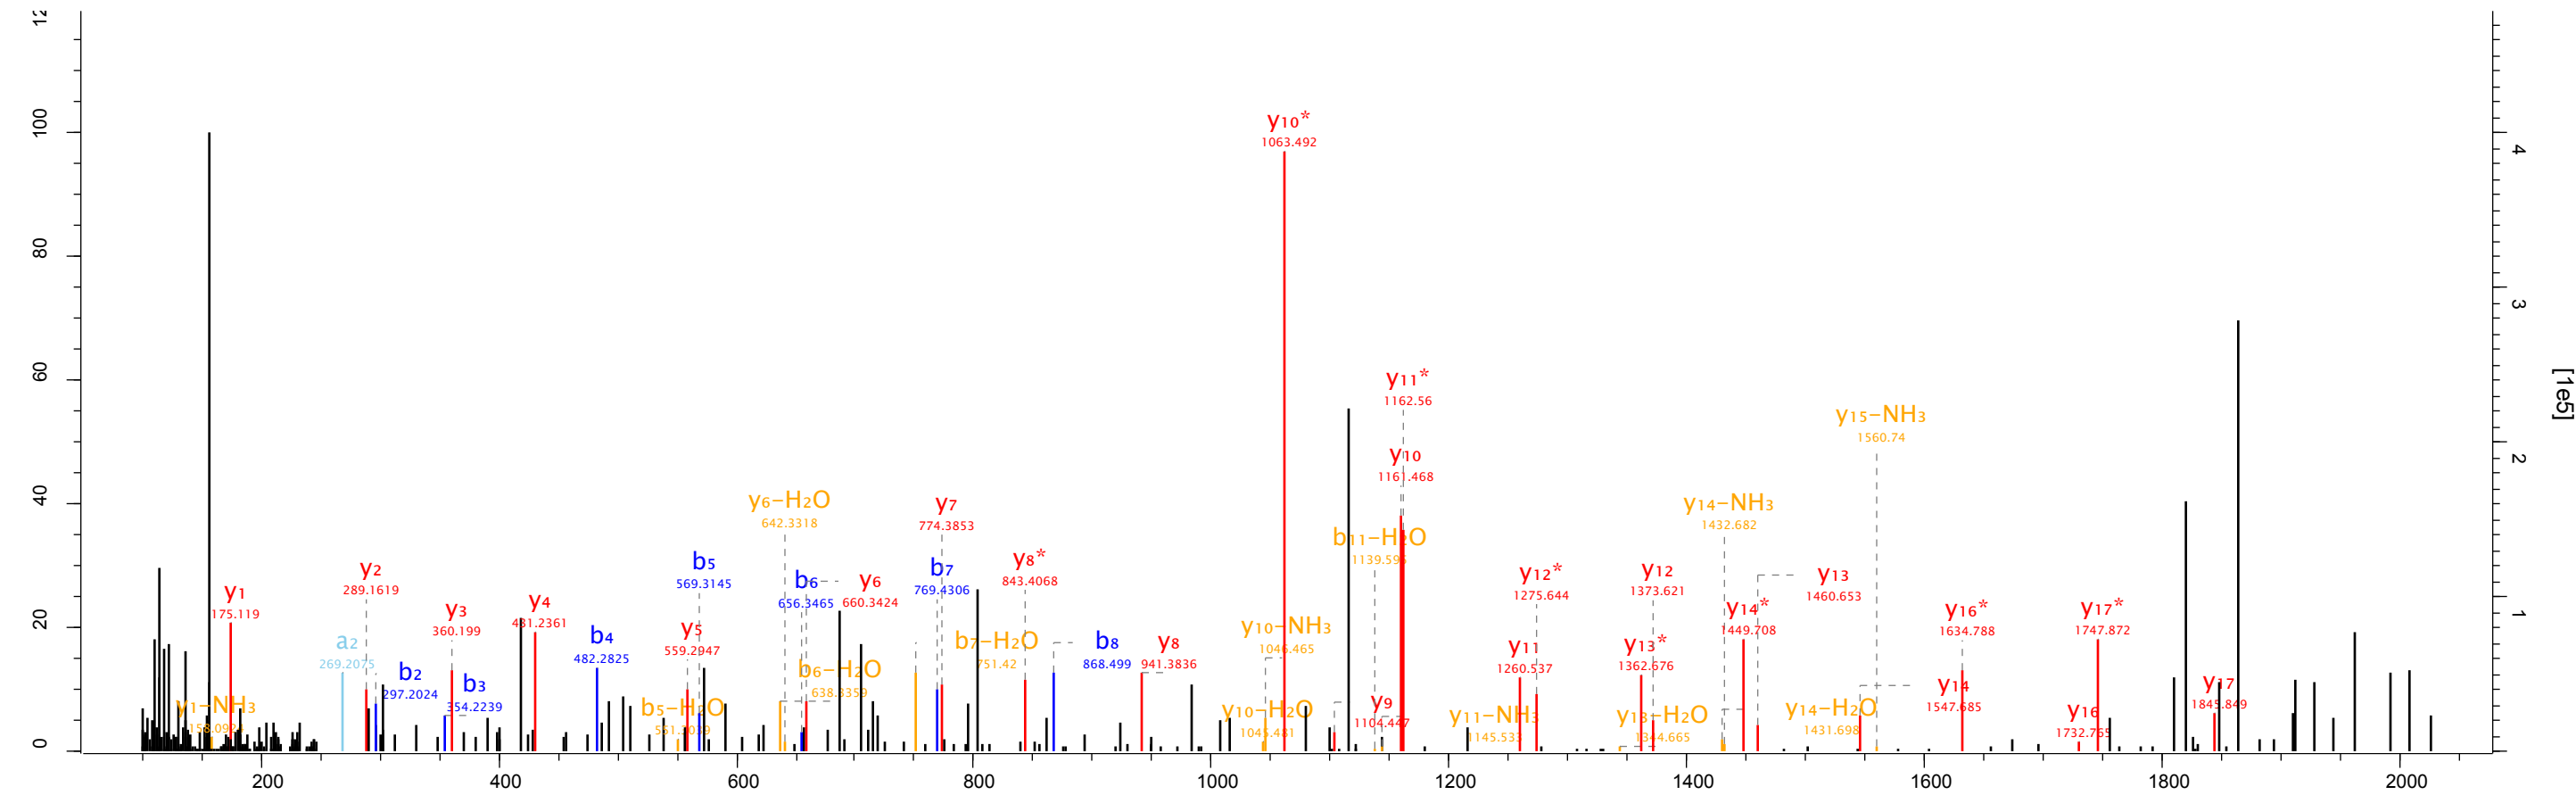

ox M - L G Q S S L V G Y S N T Q A A N R -

b<sub>2</sub> b<sub>3</sub> b<sub>4</sub> b<sub>5</sub> b<sub>6</sub> b<sub>7</sub> b<sub>8</sub>

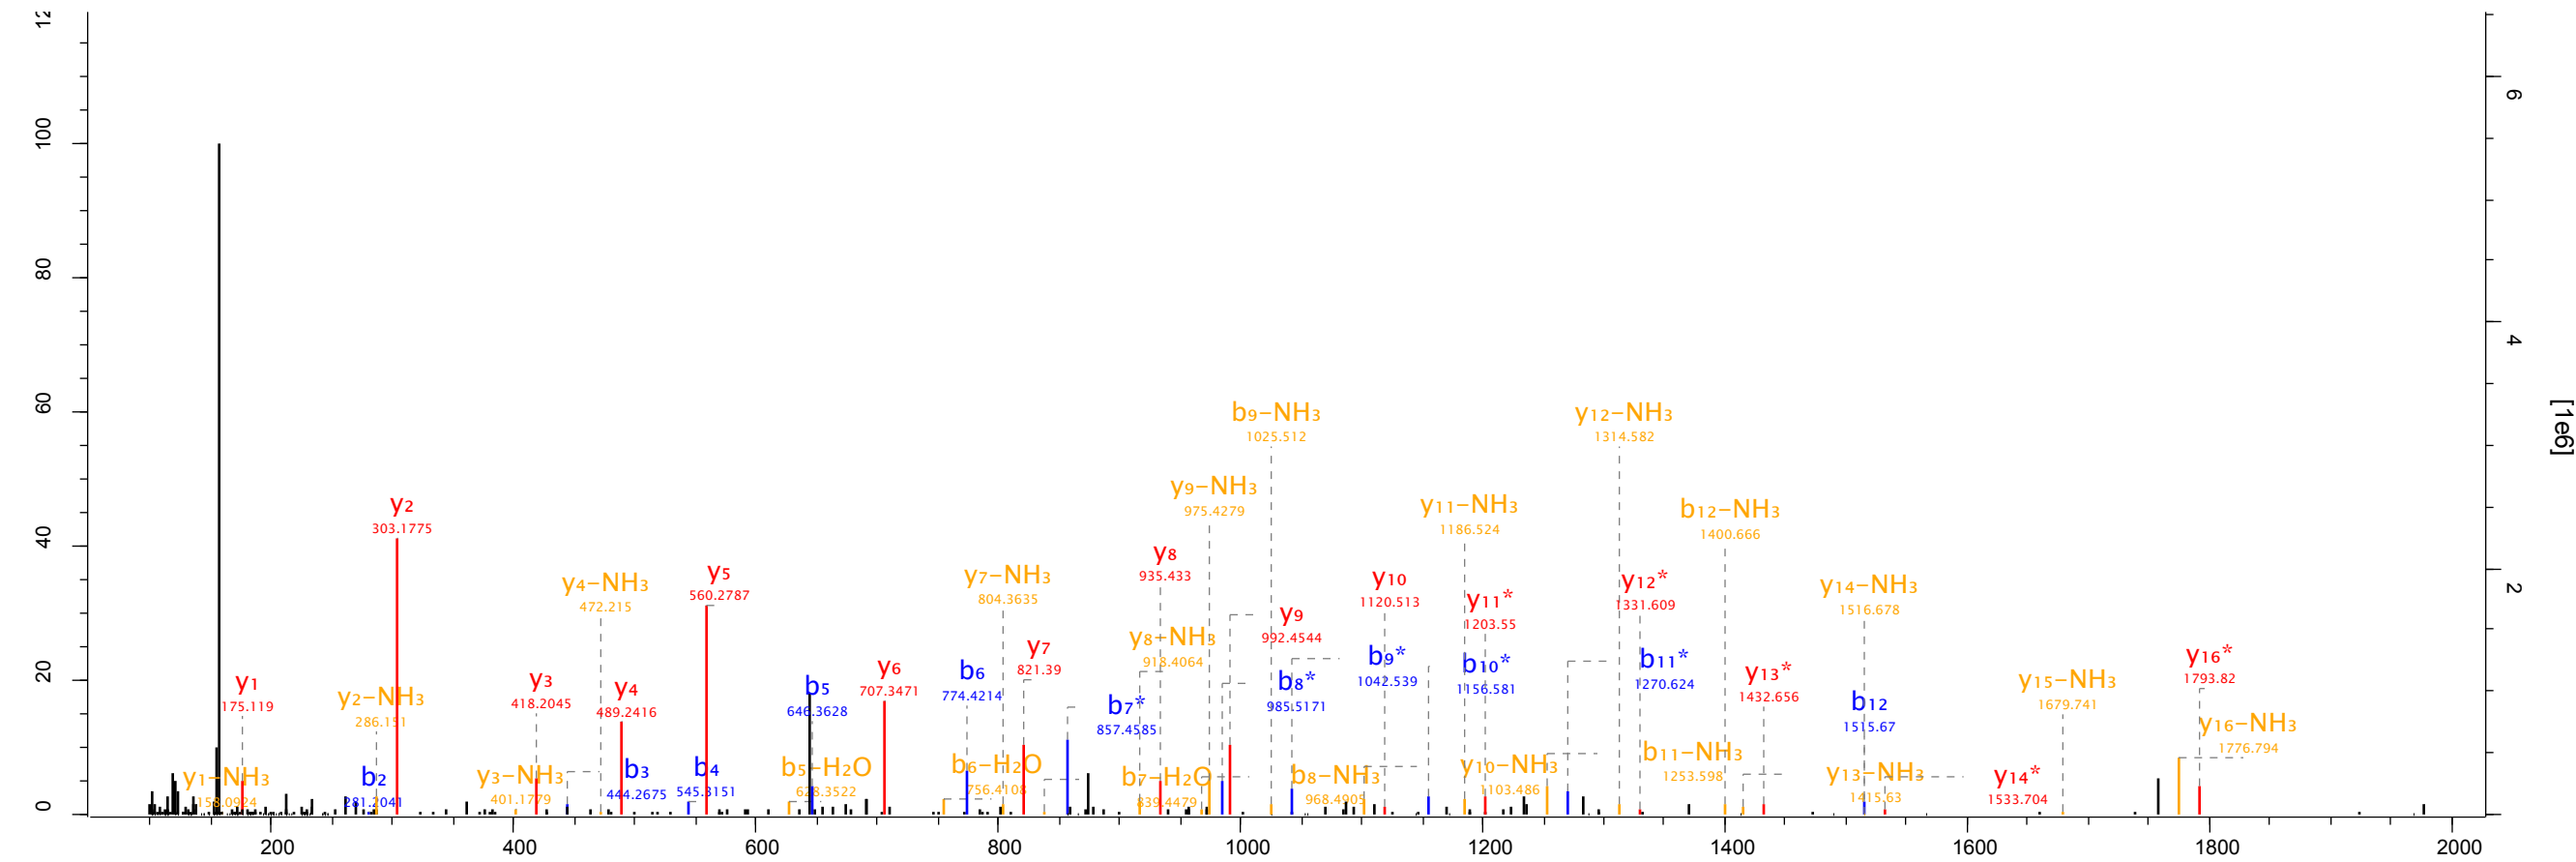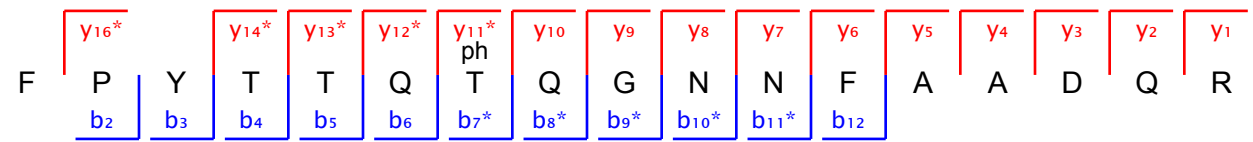

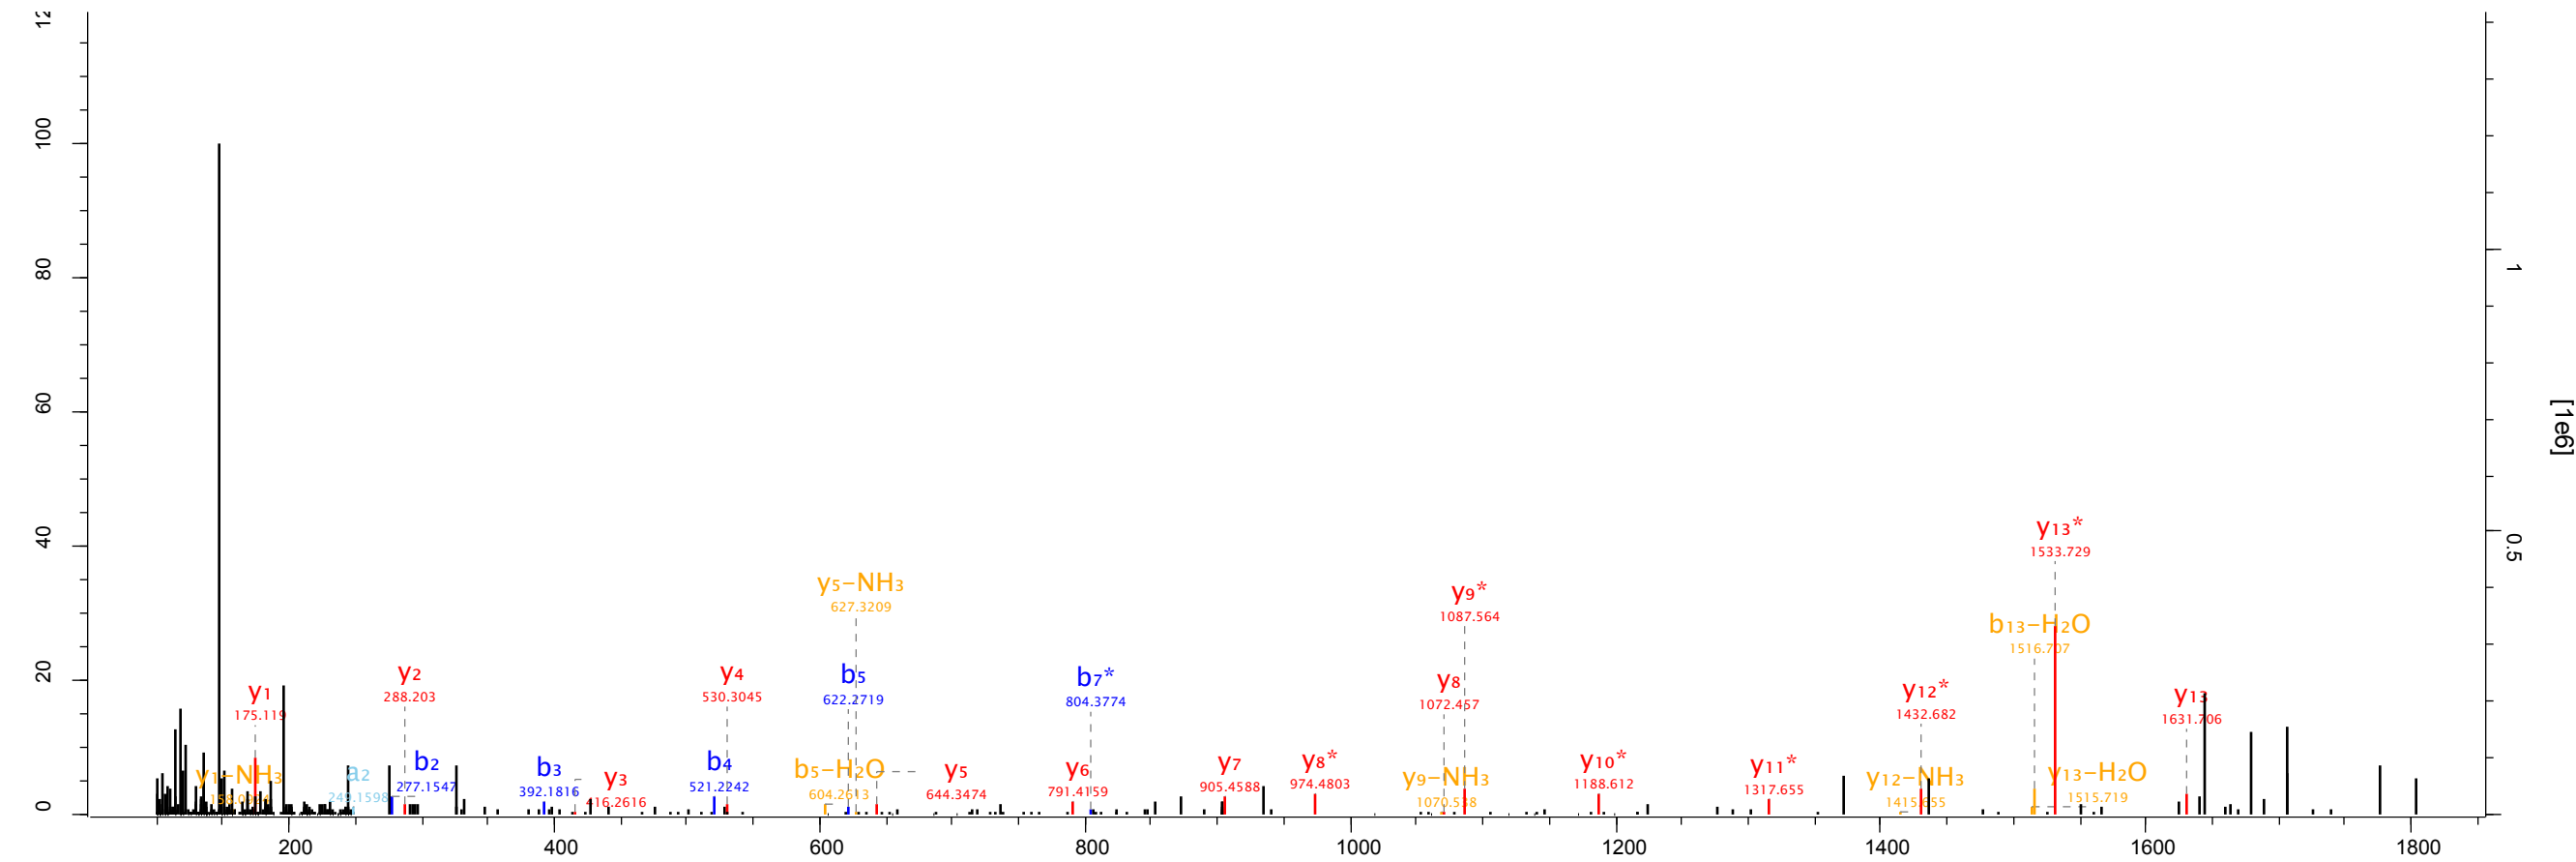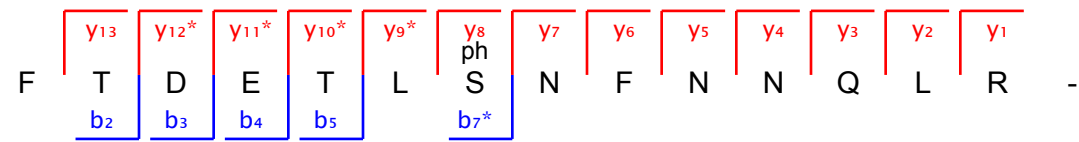

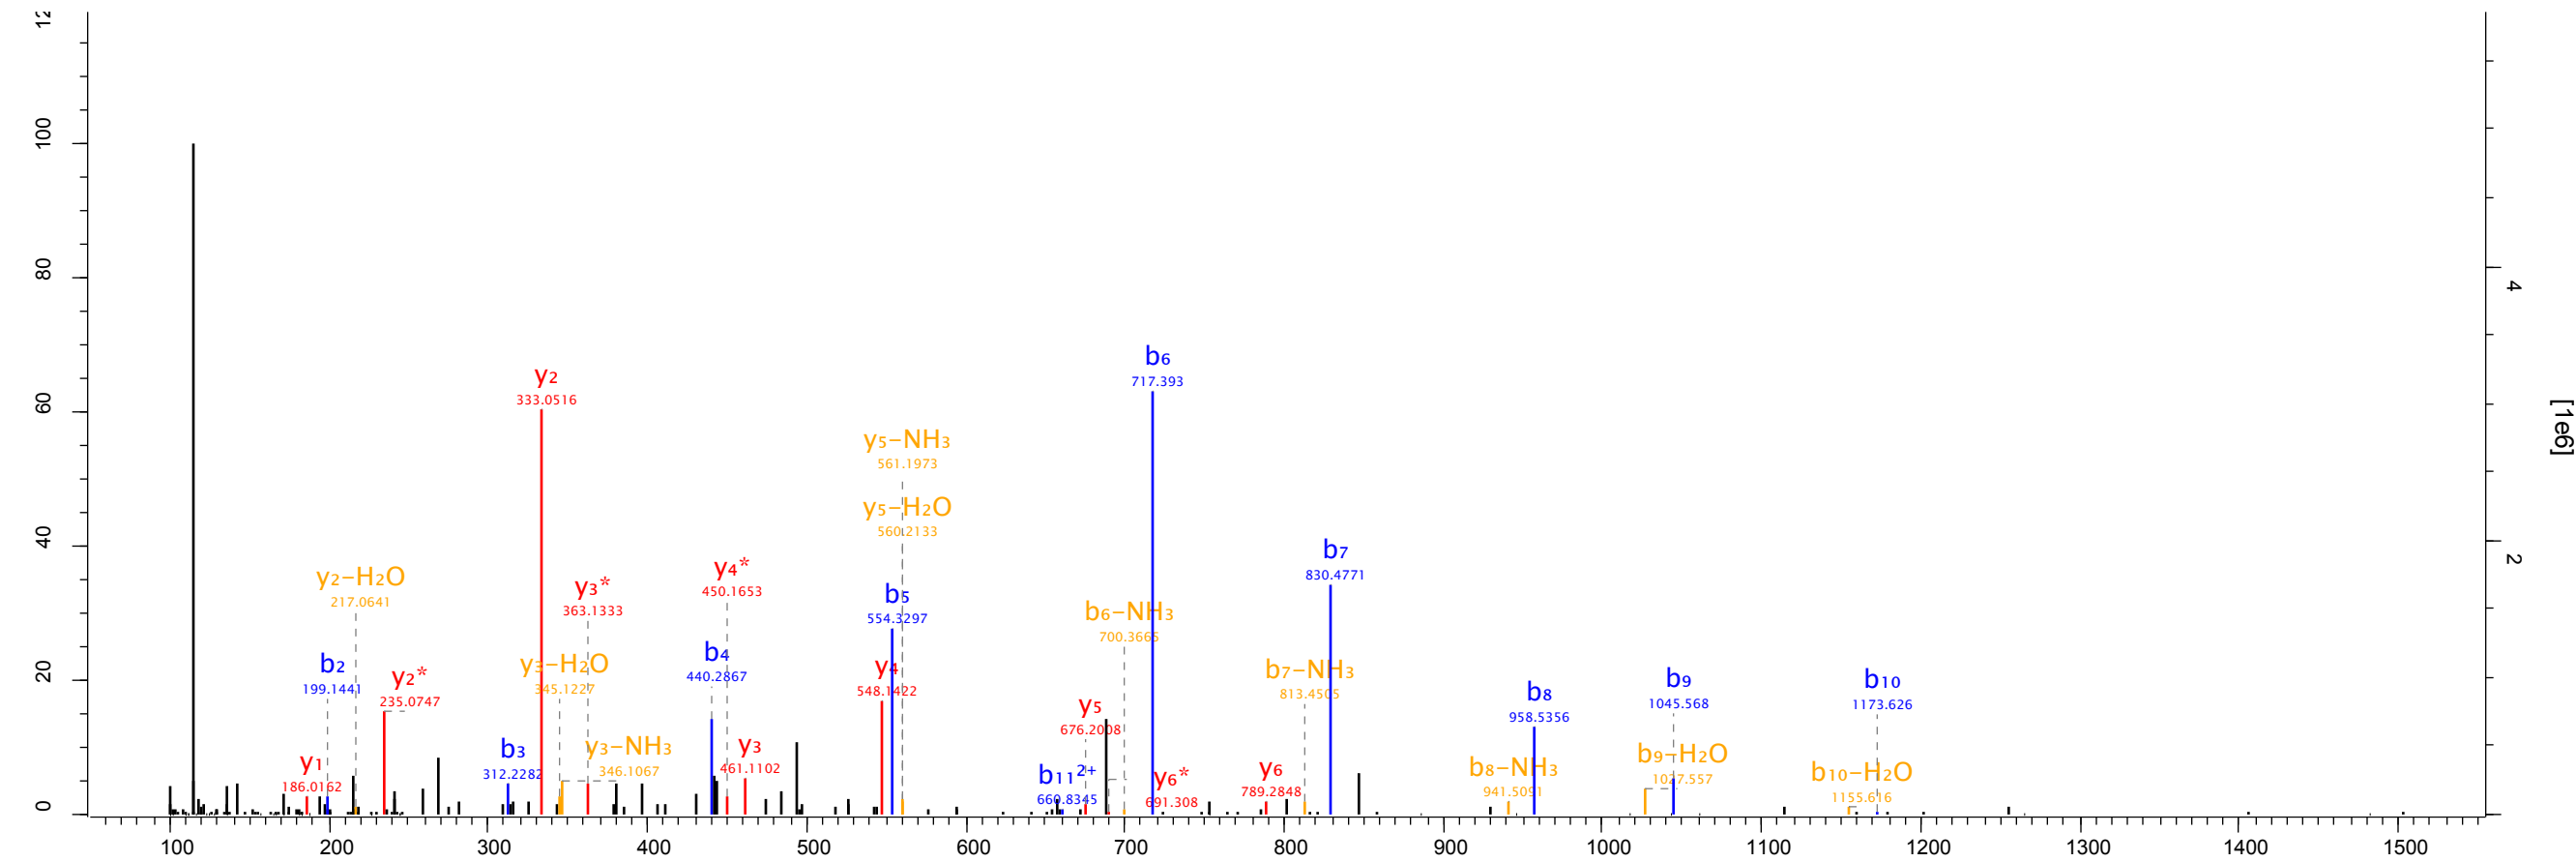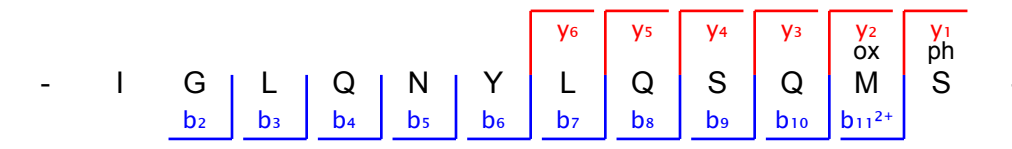

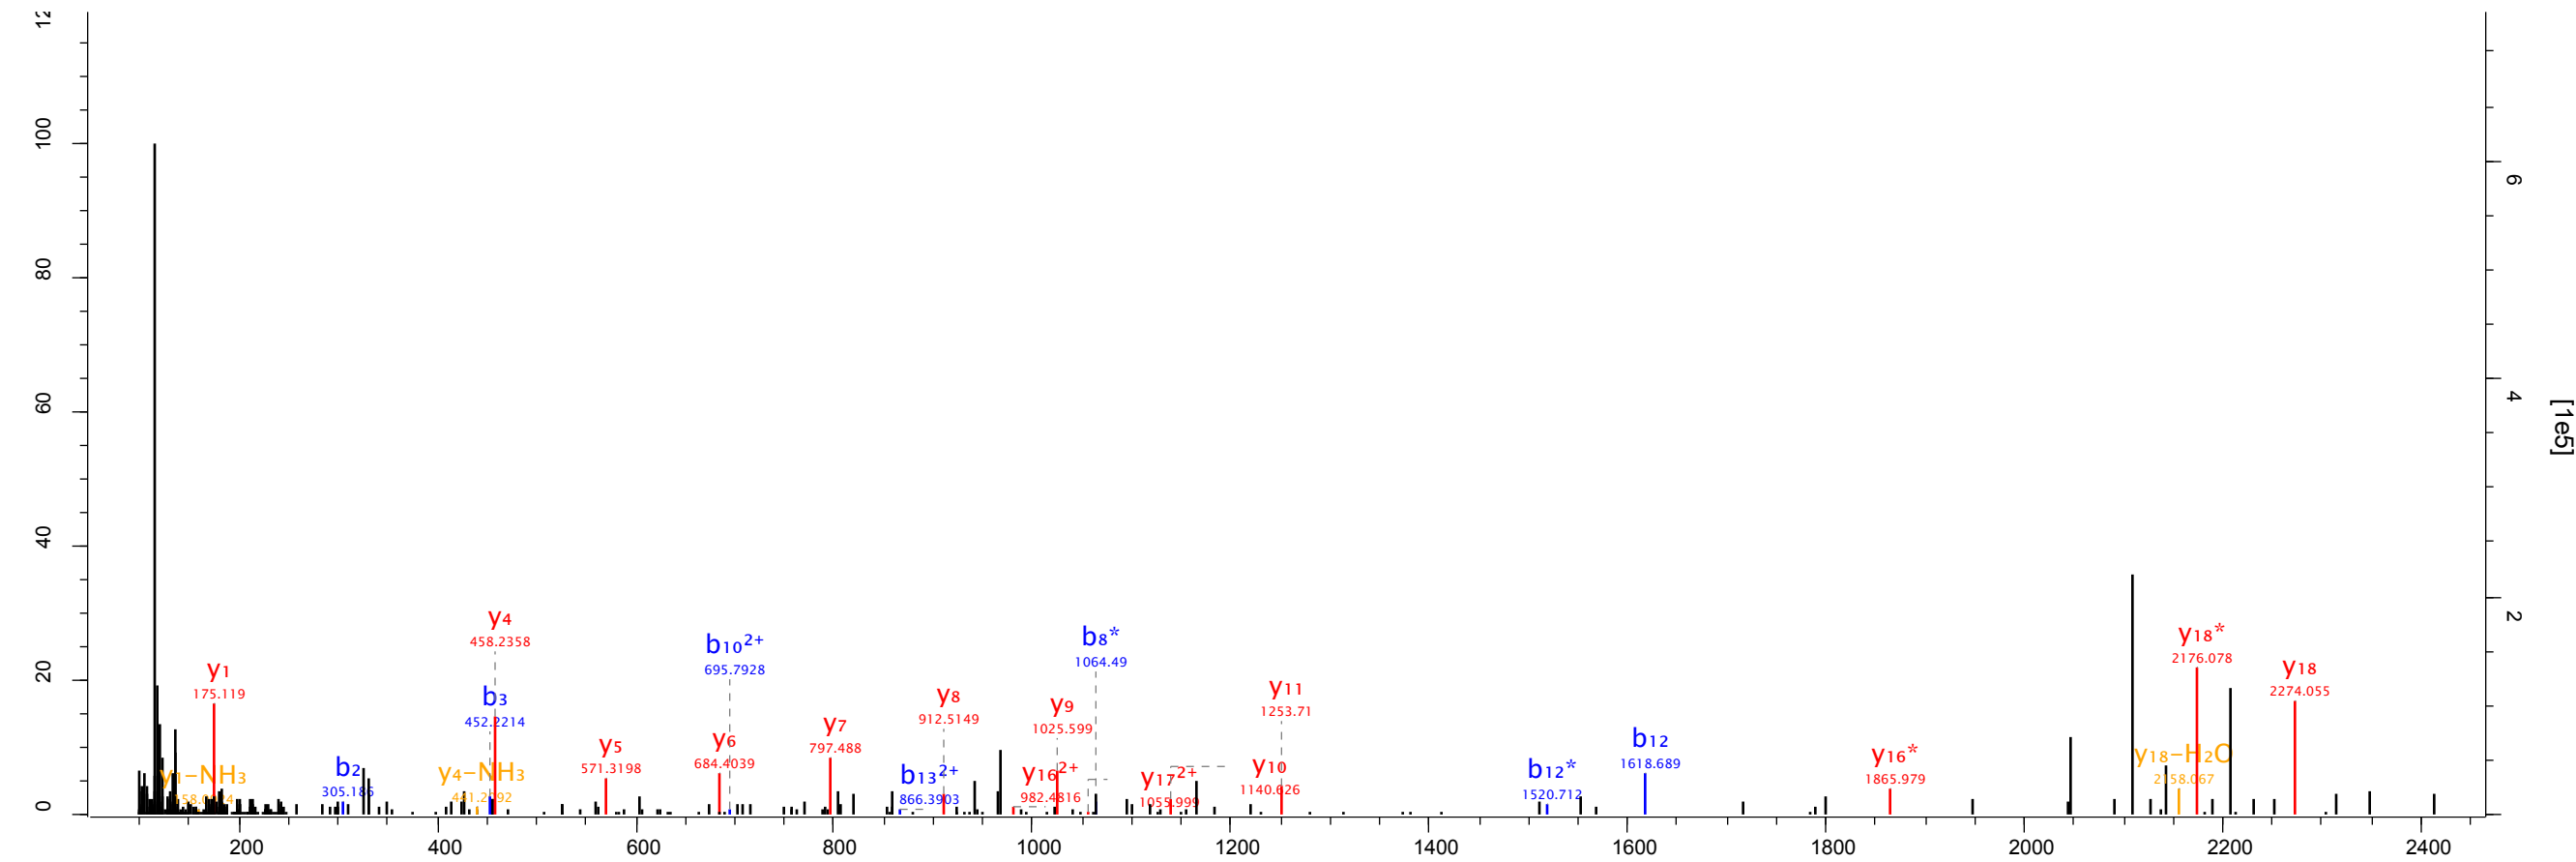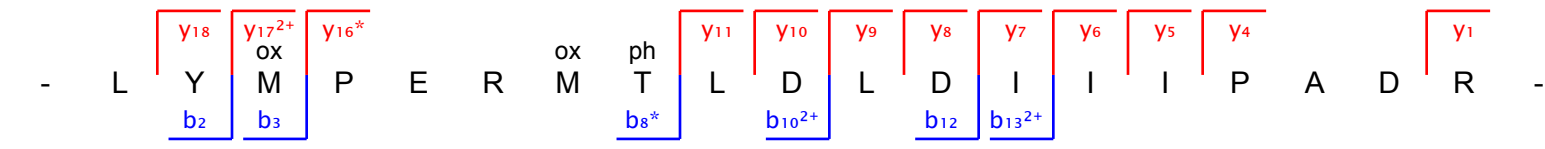

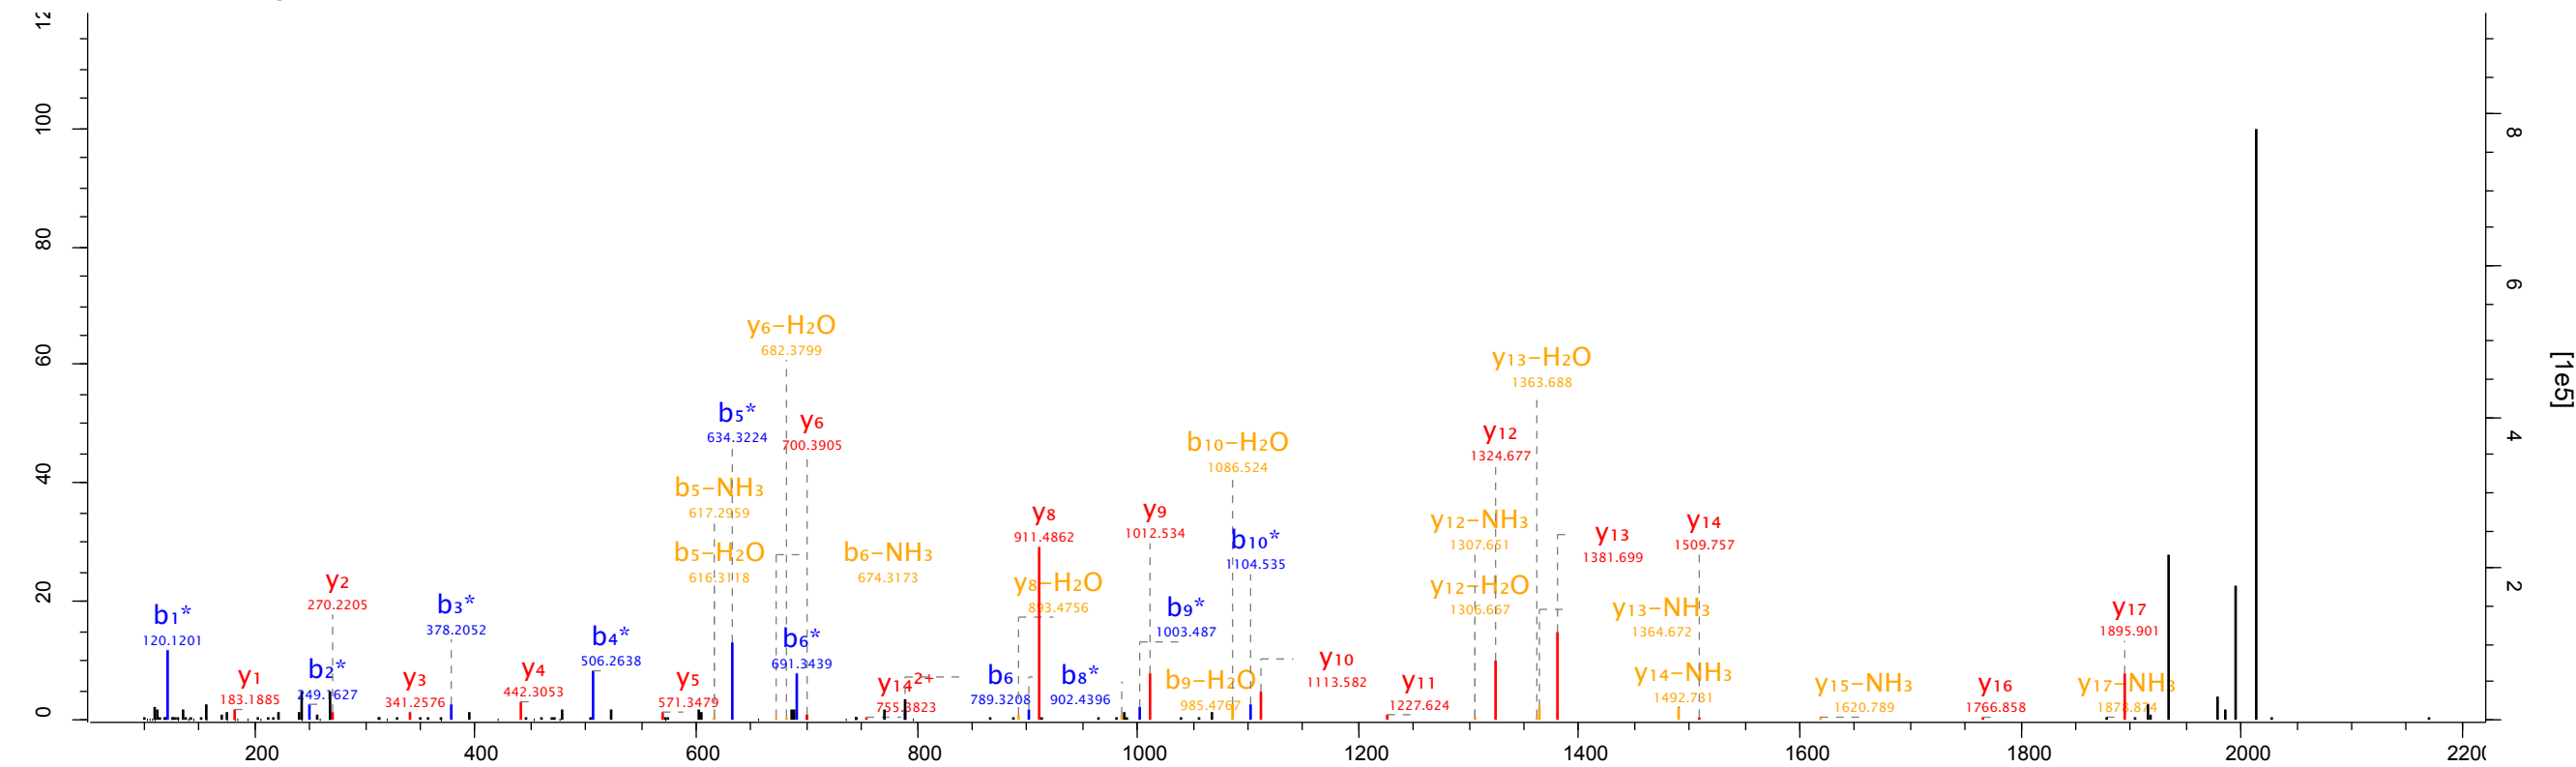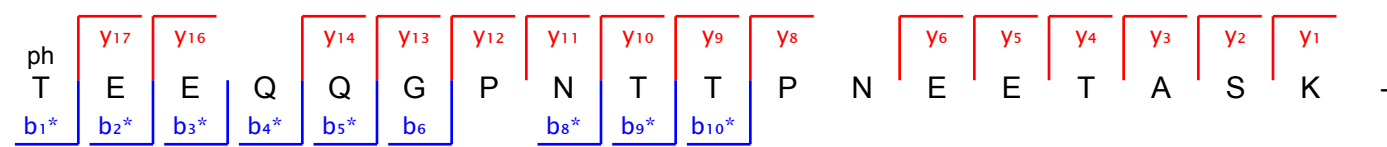

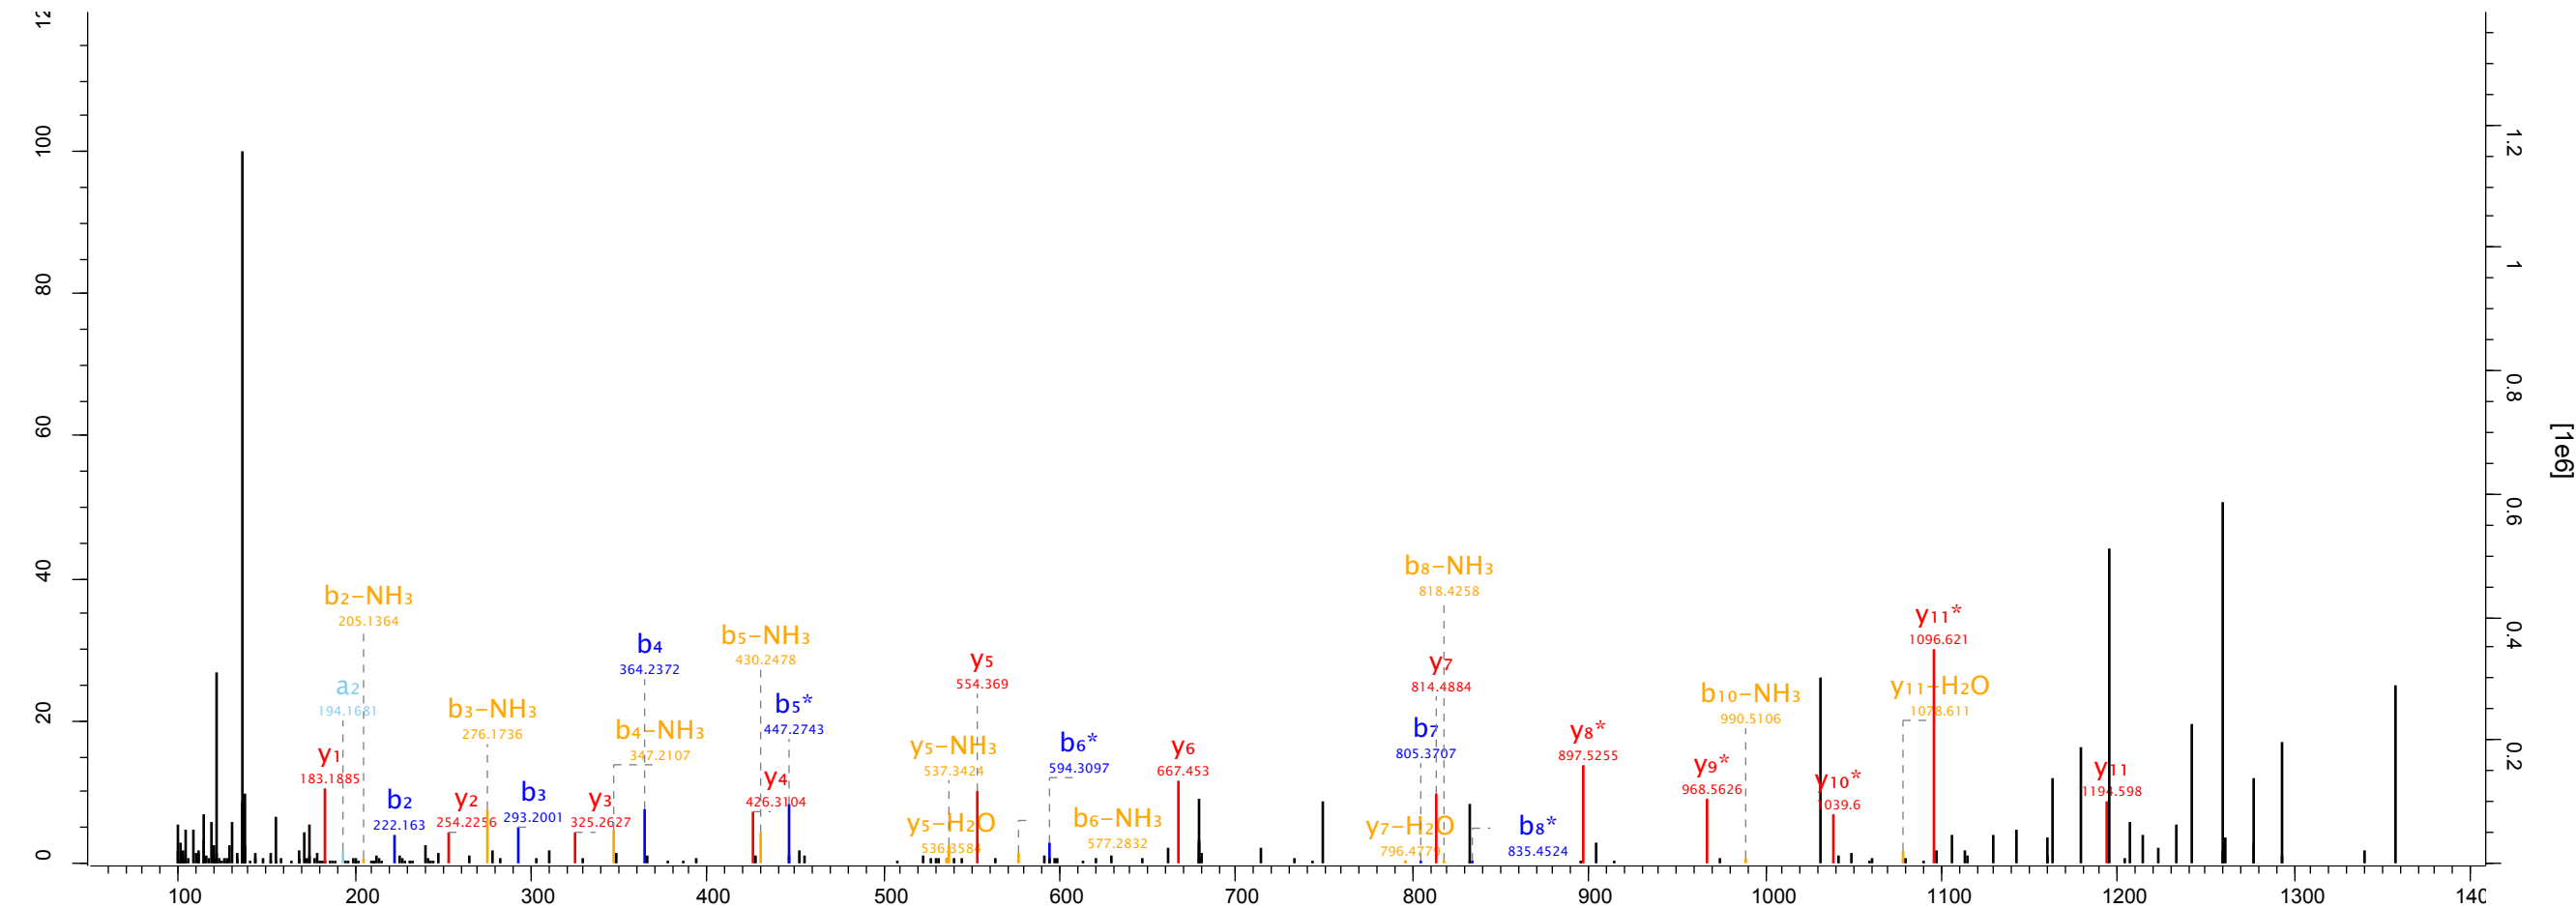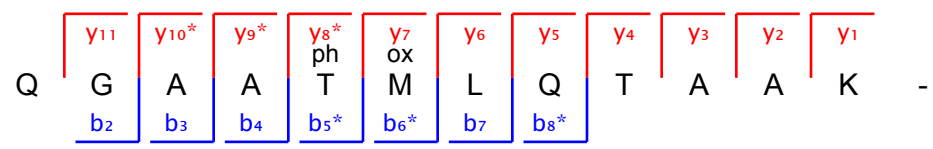



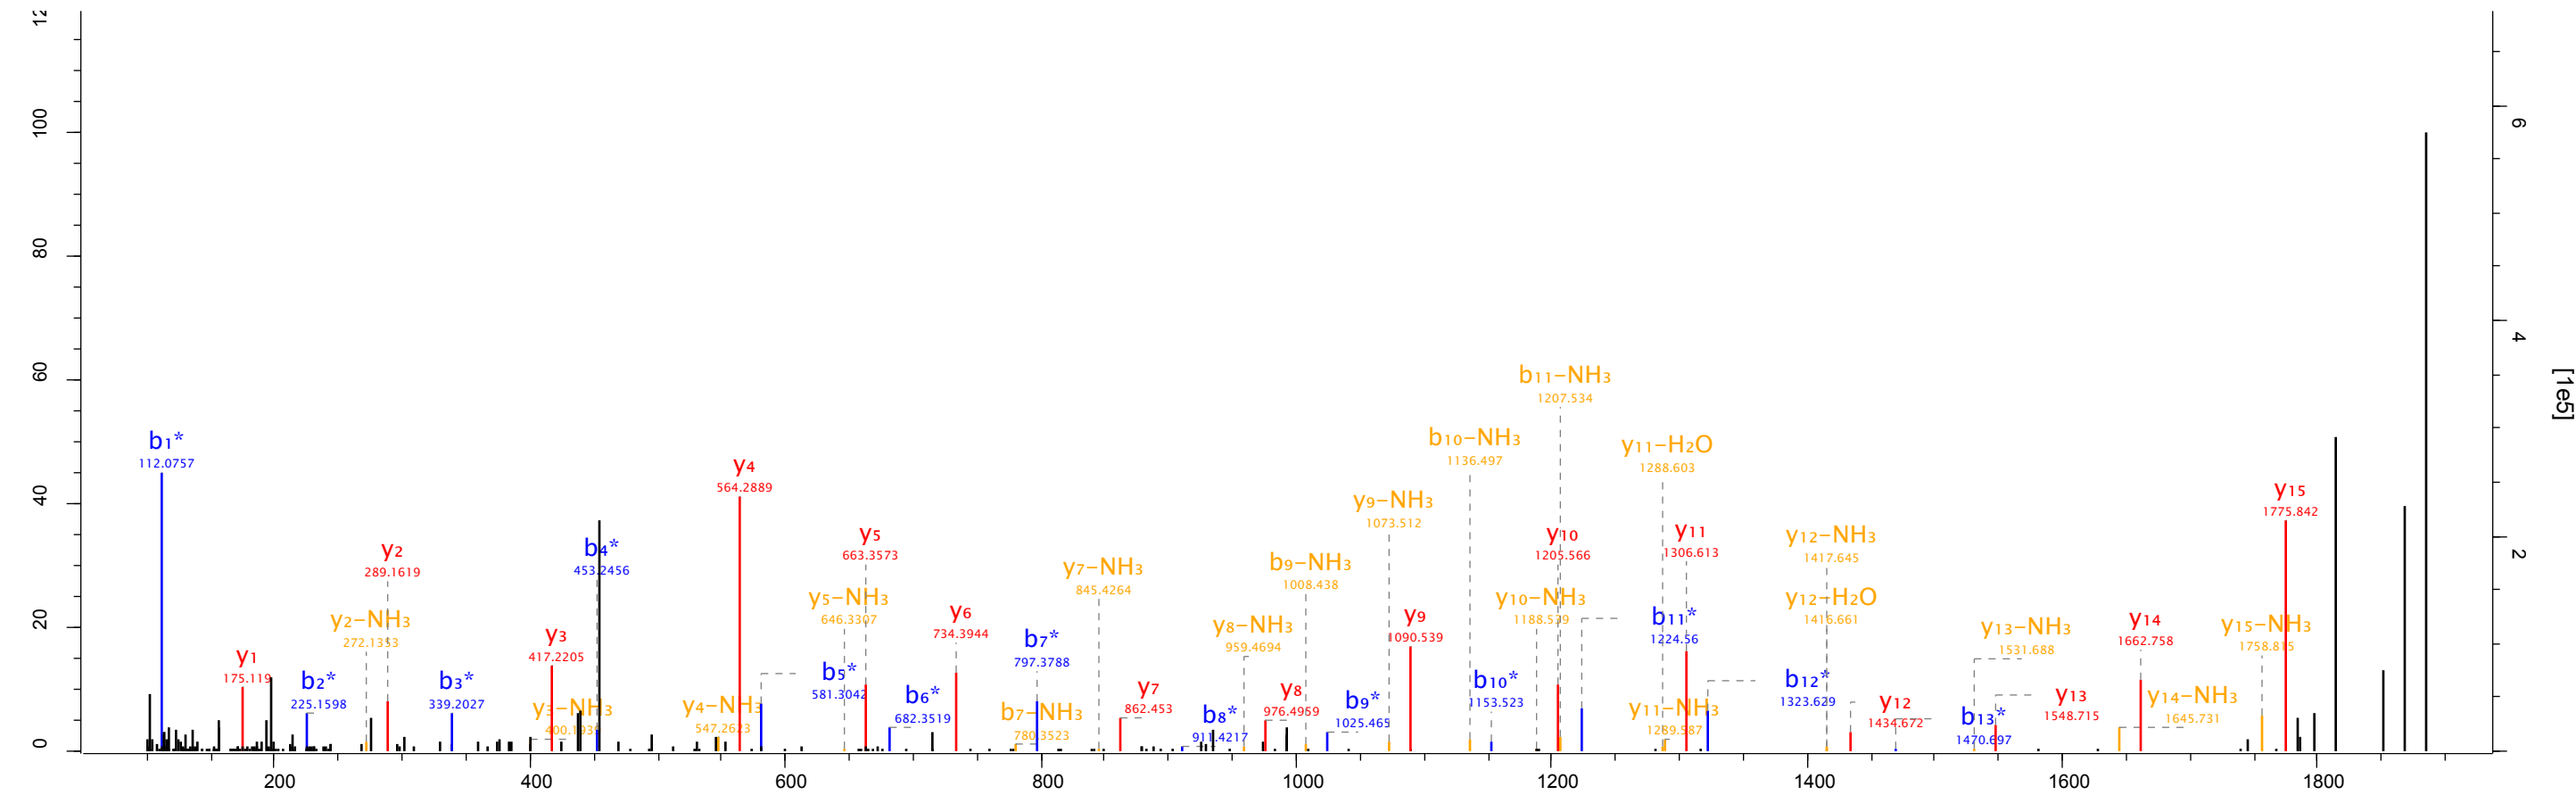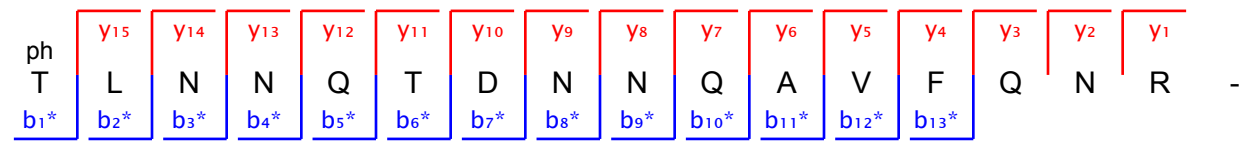

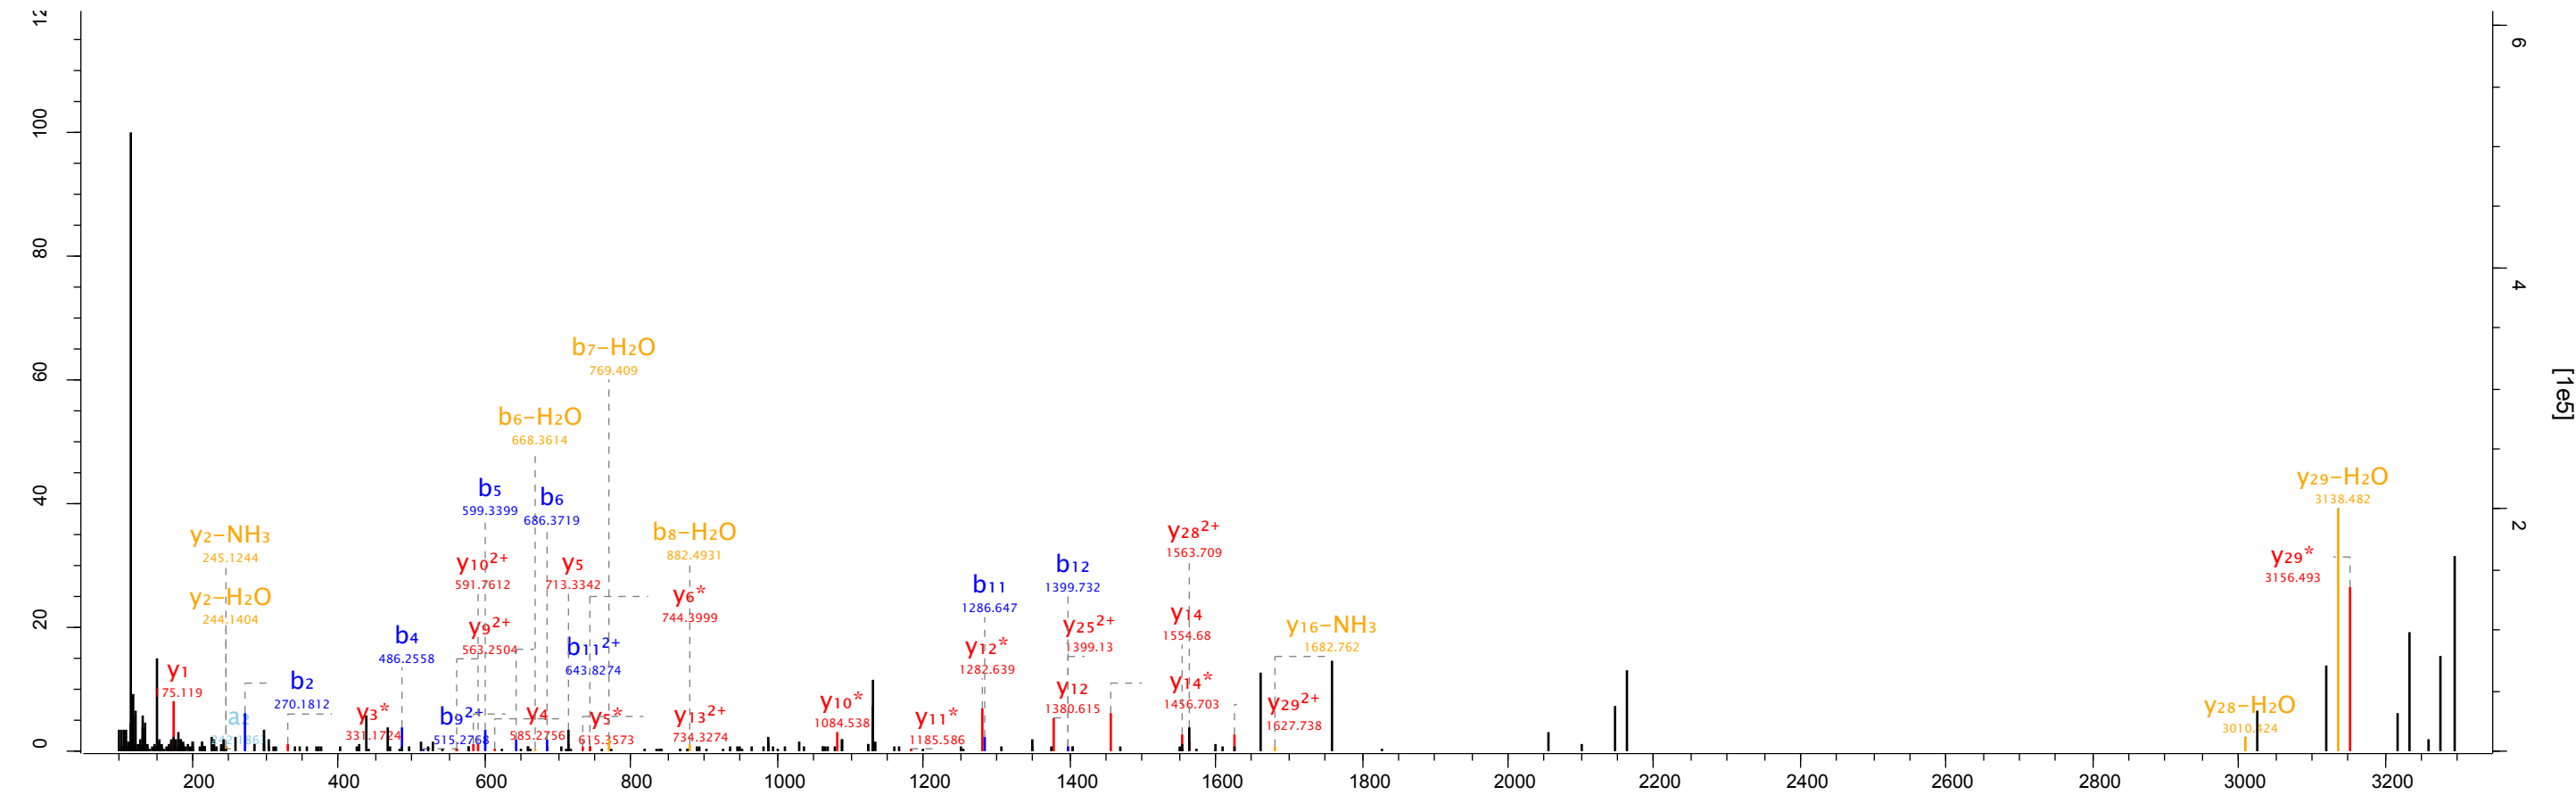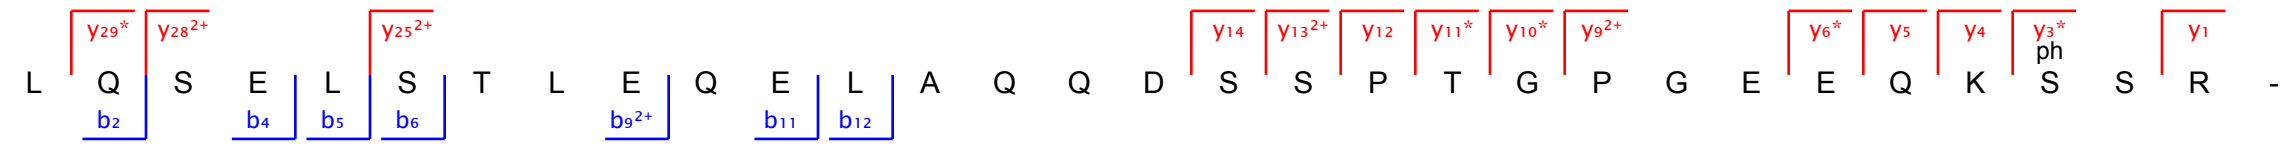

- L Q S E L S T L E Q E L A Q Q D S S P T G P G E E Q K S S R -

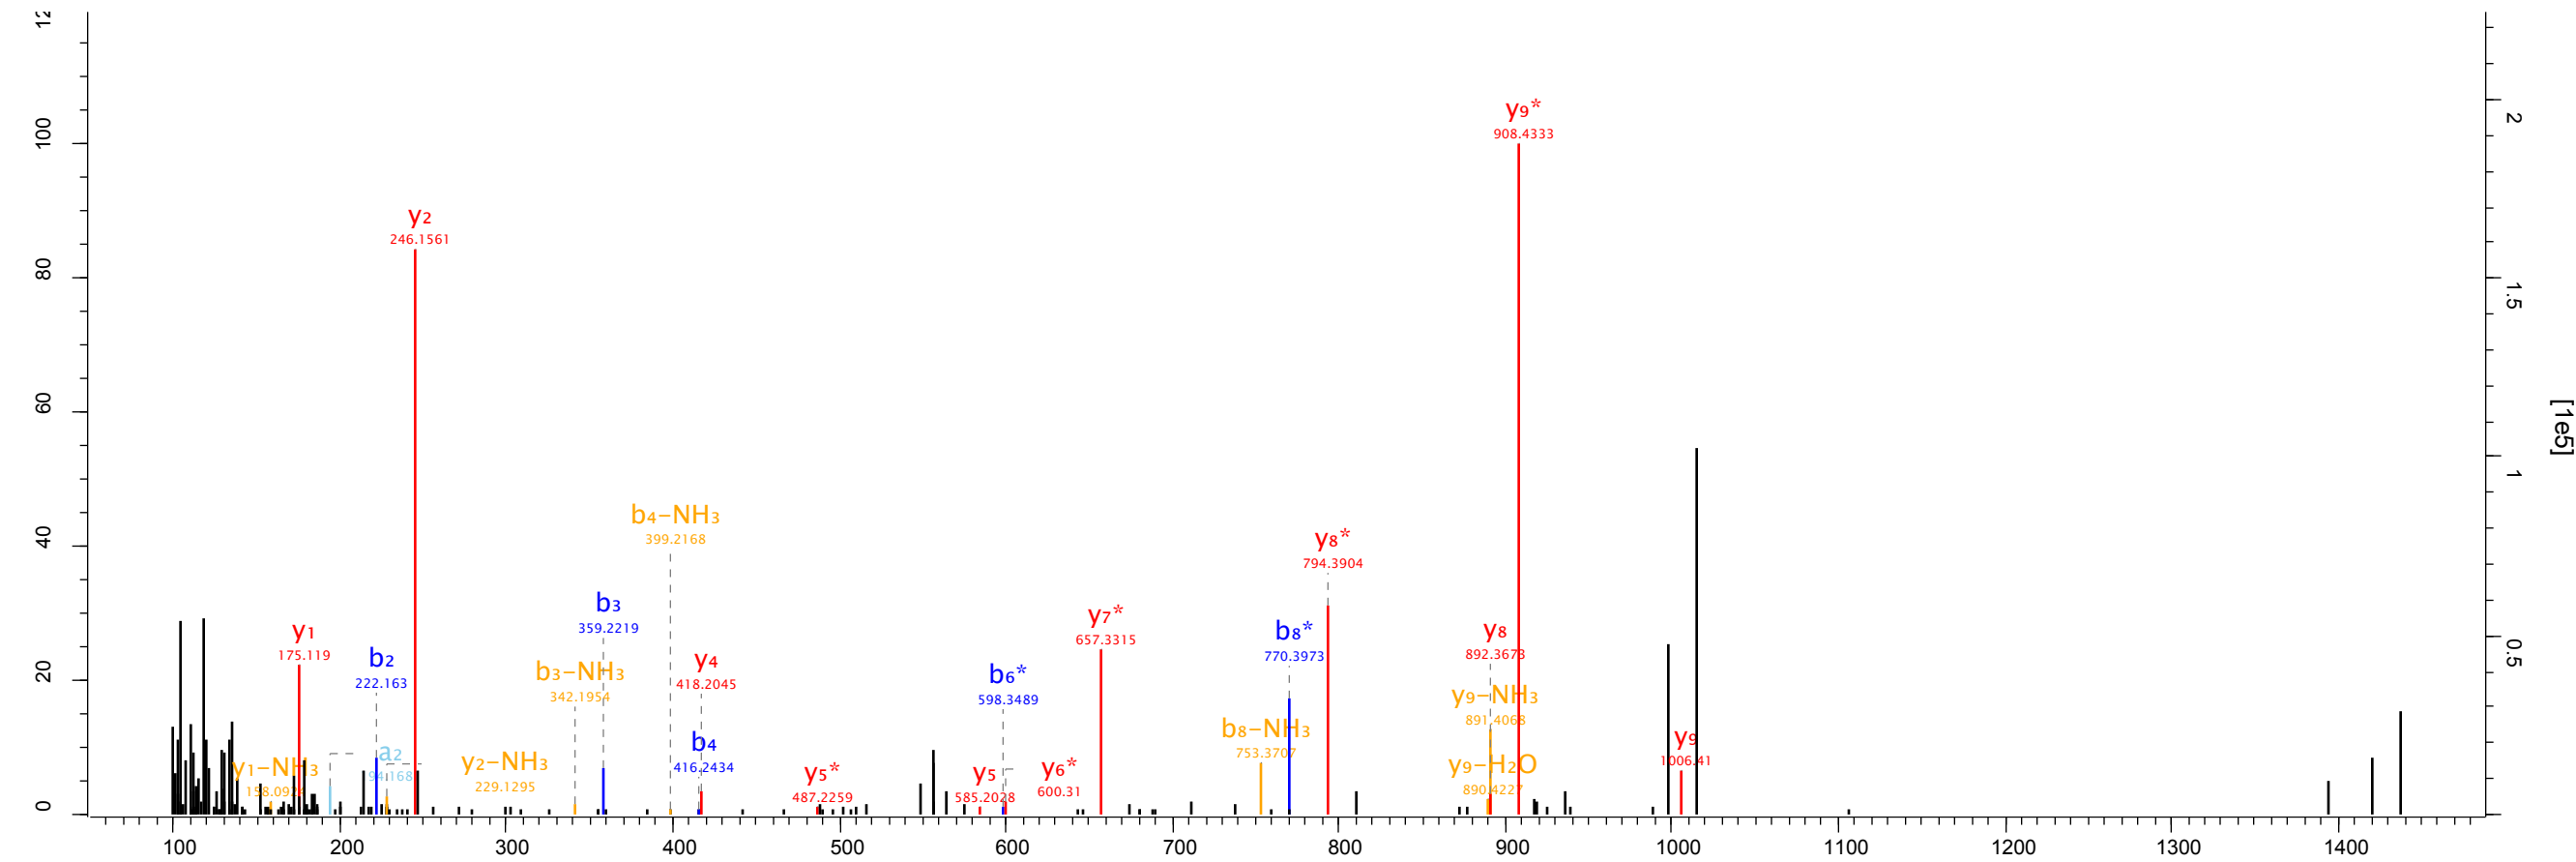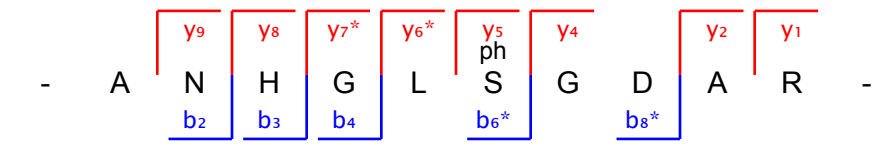

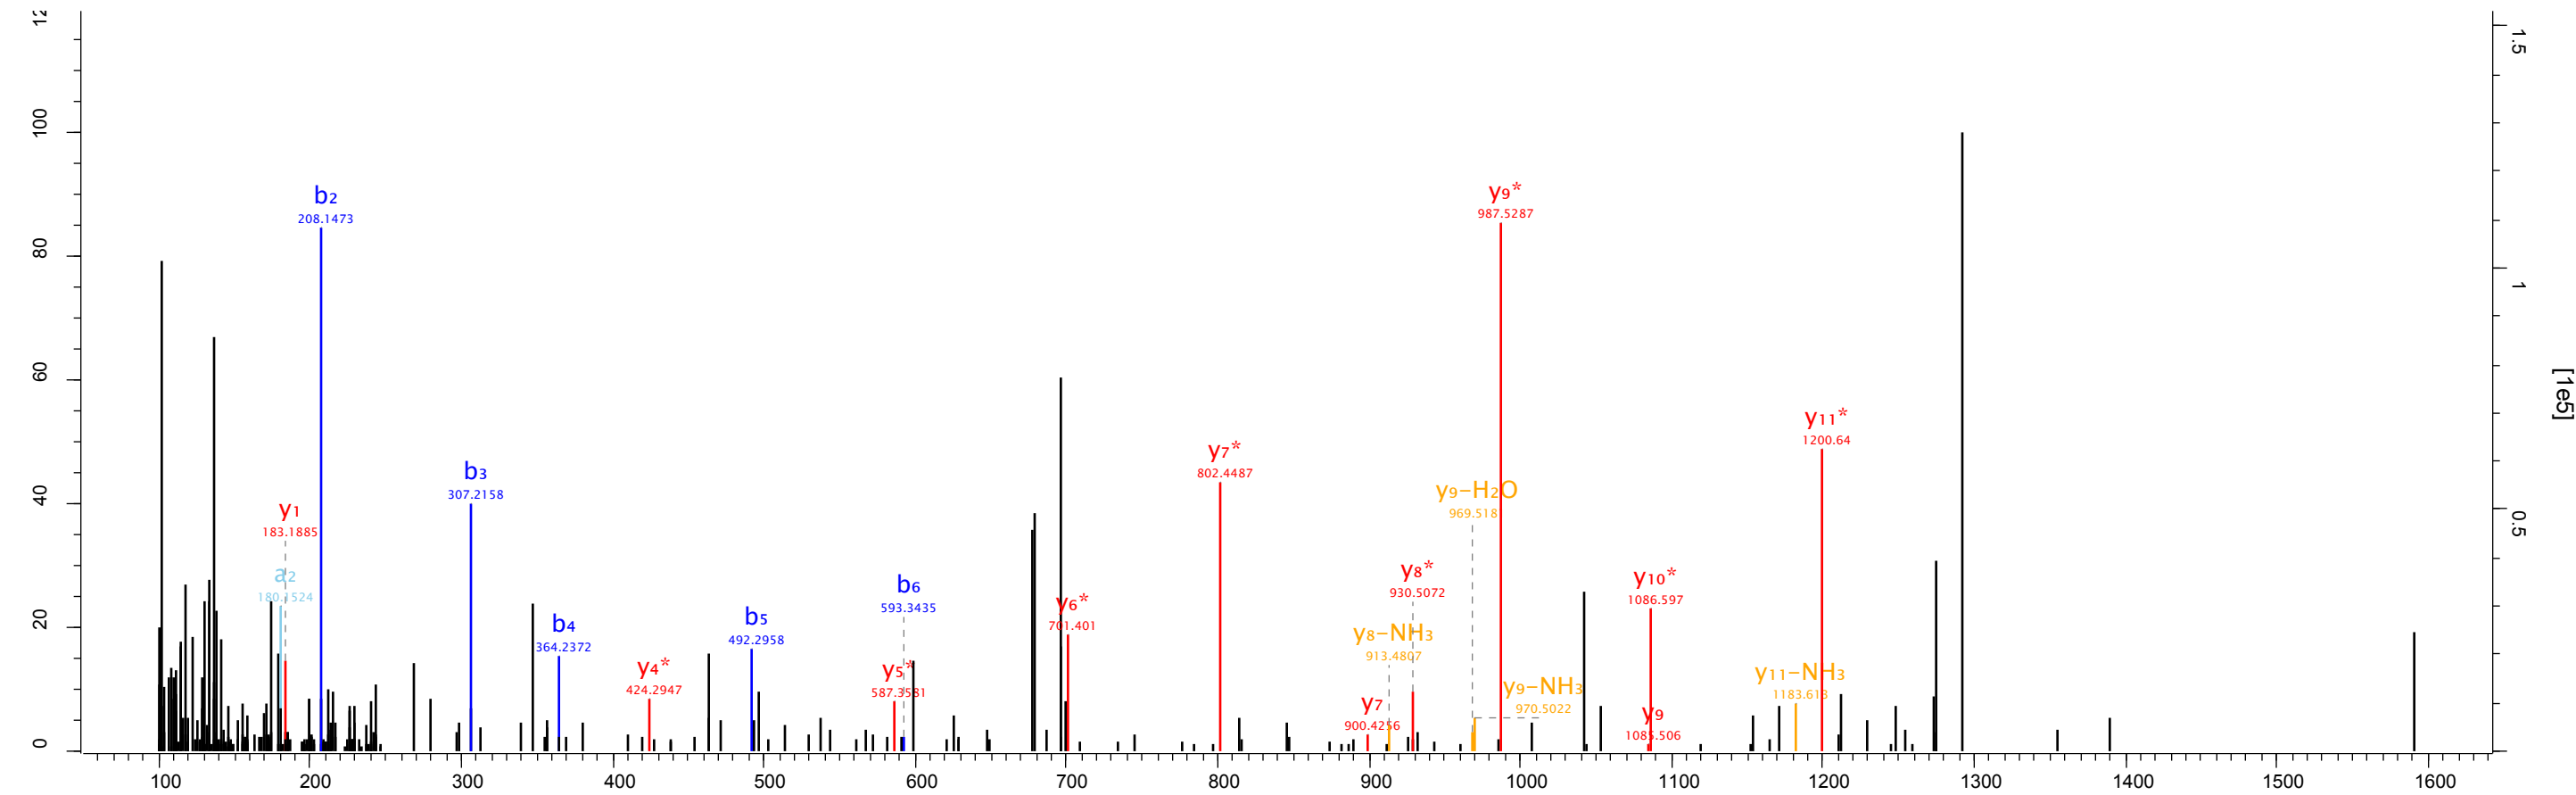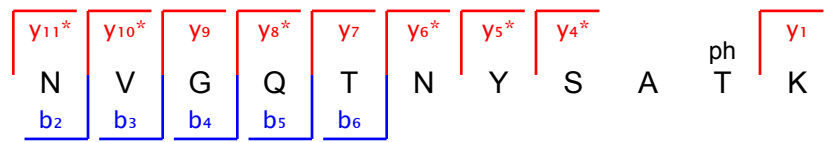

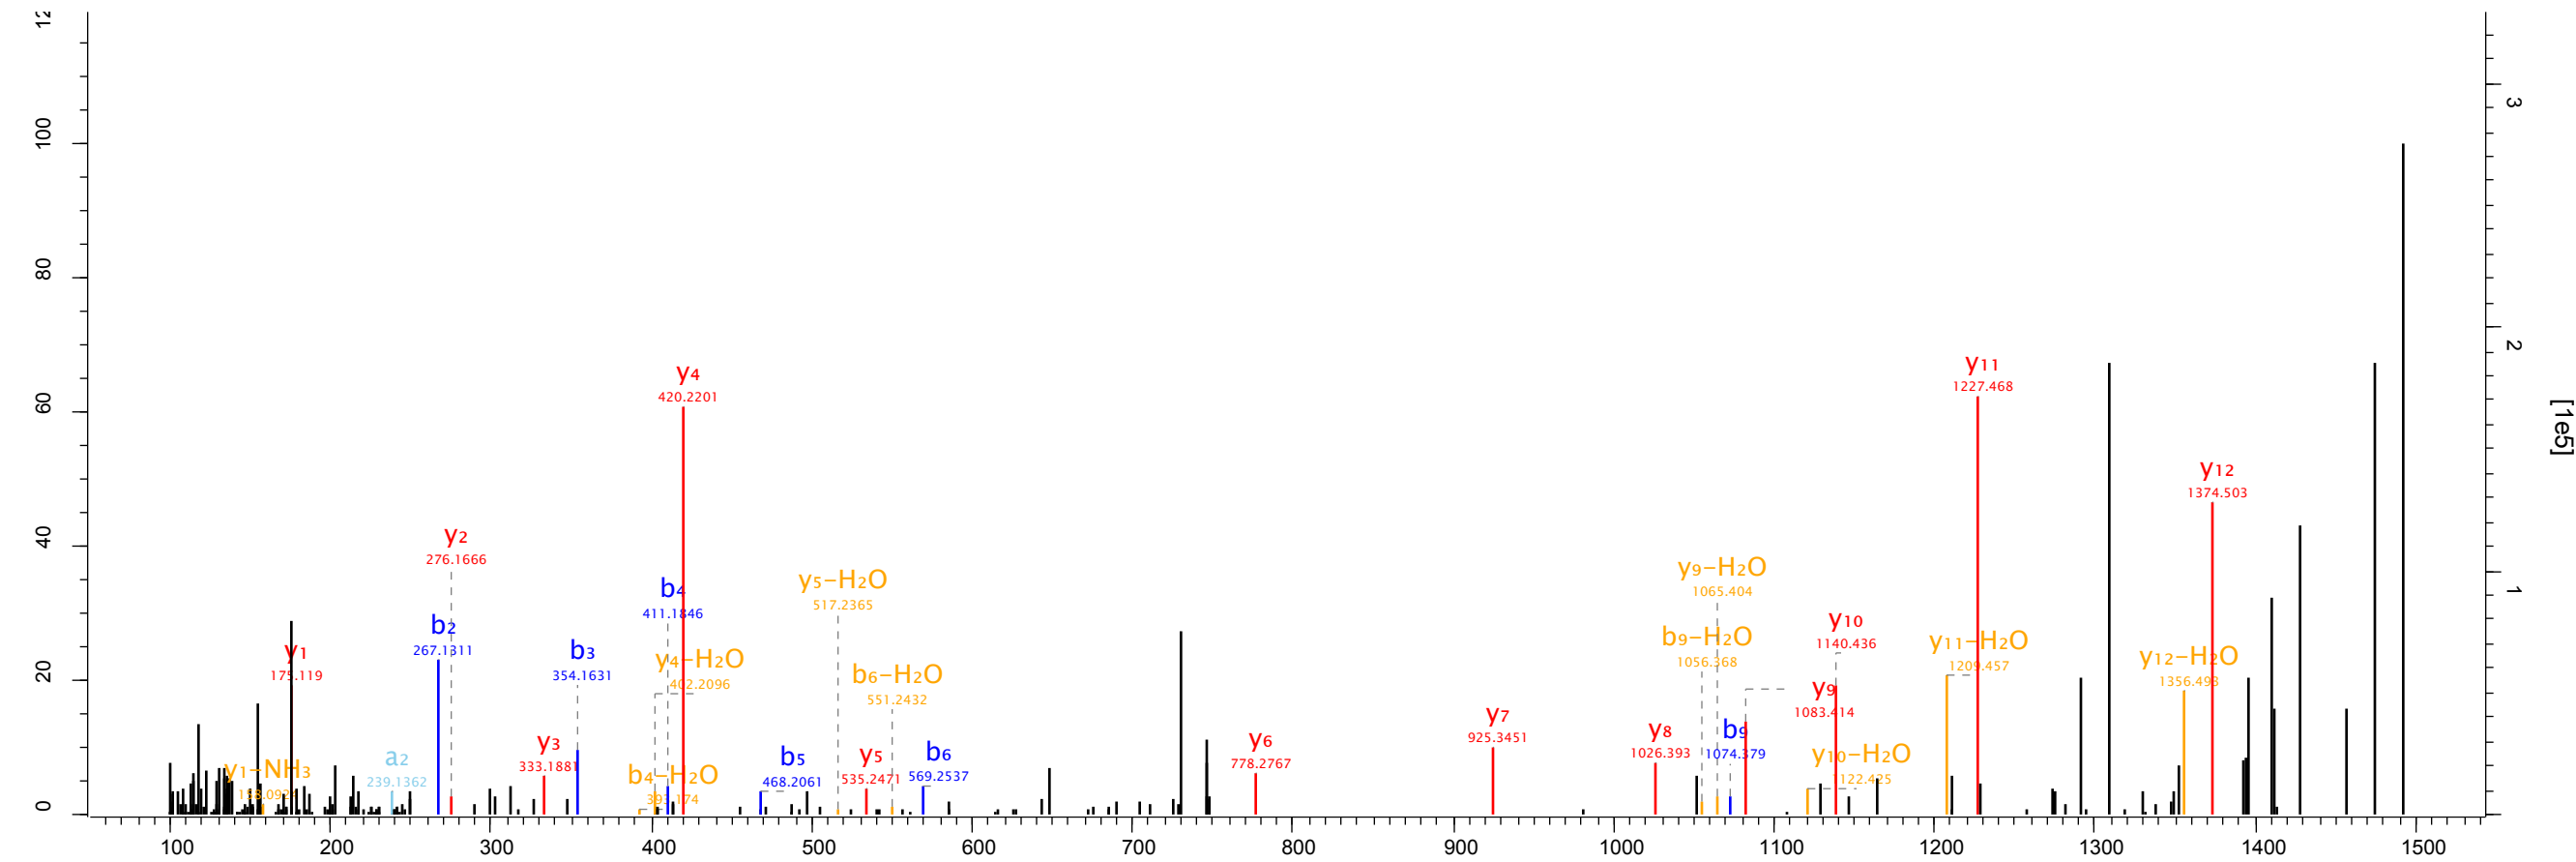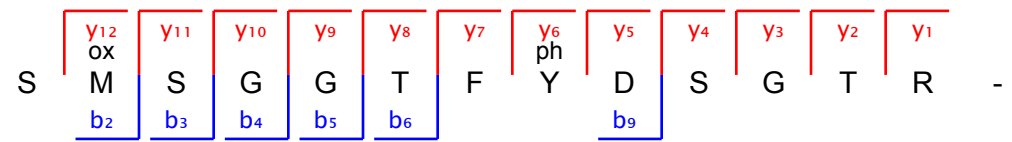

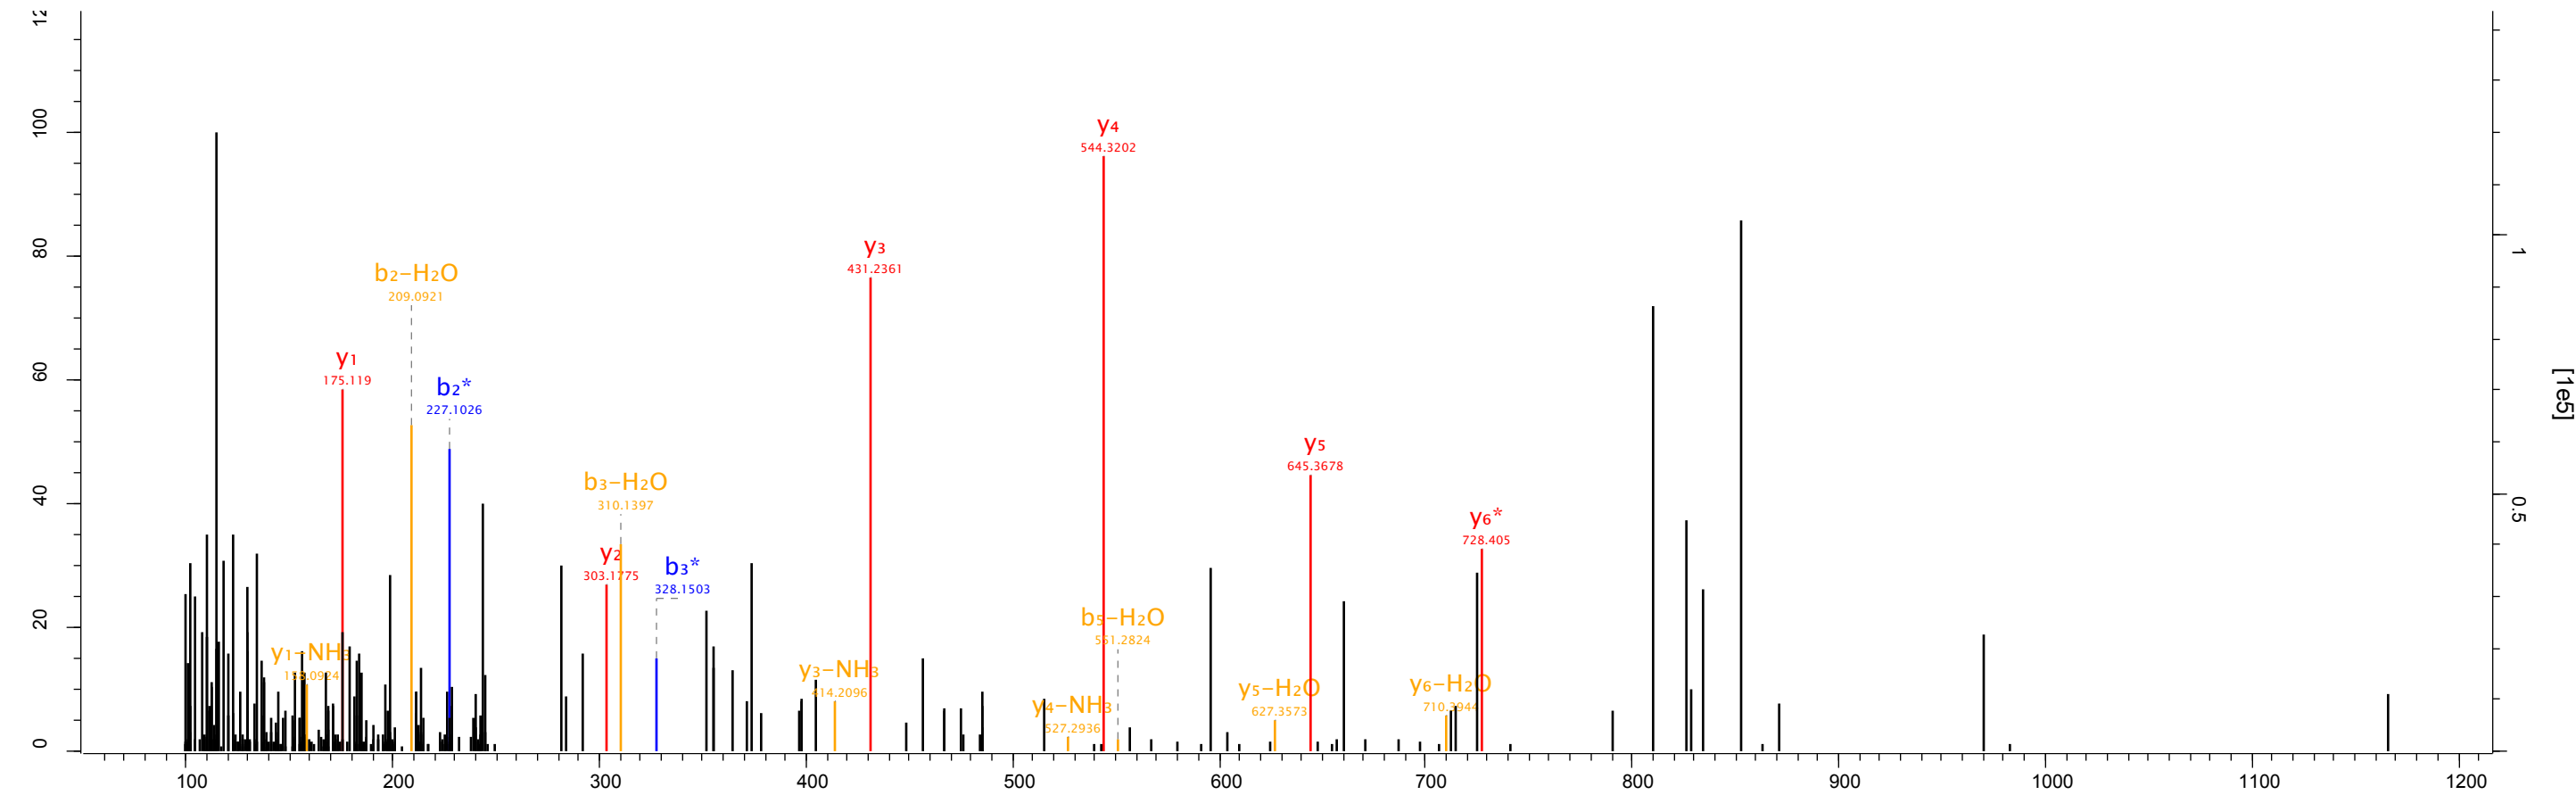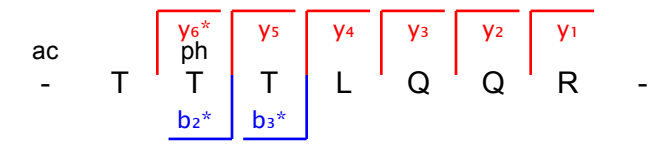

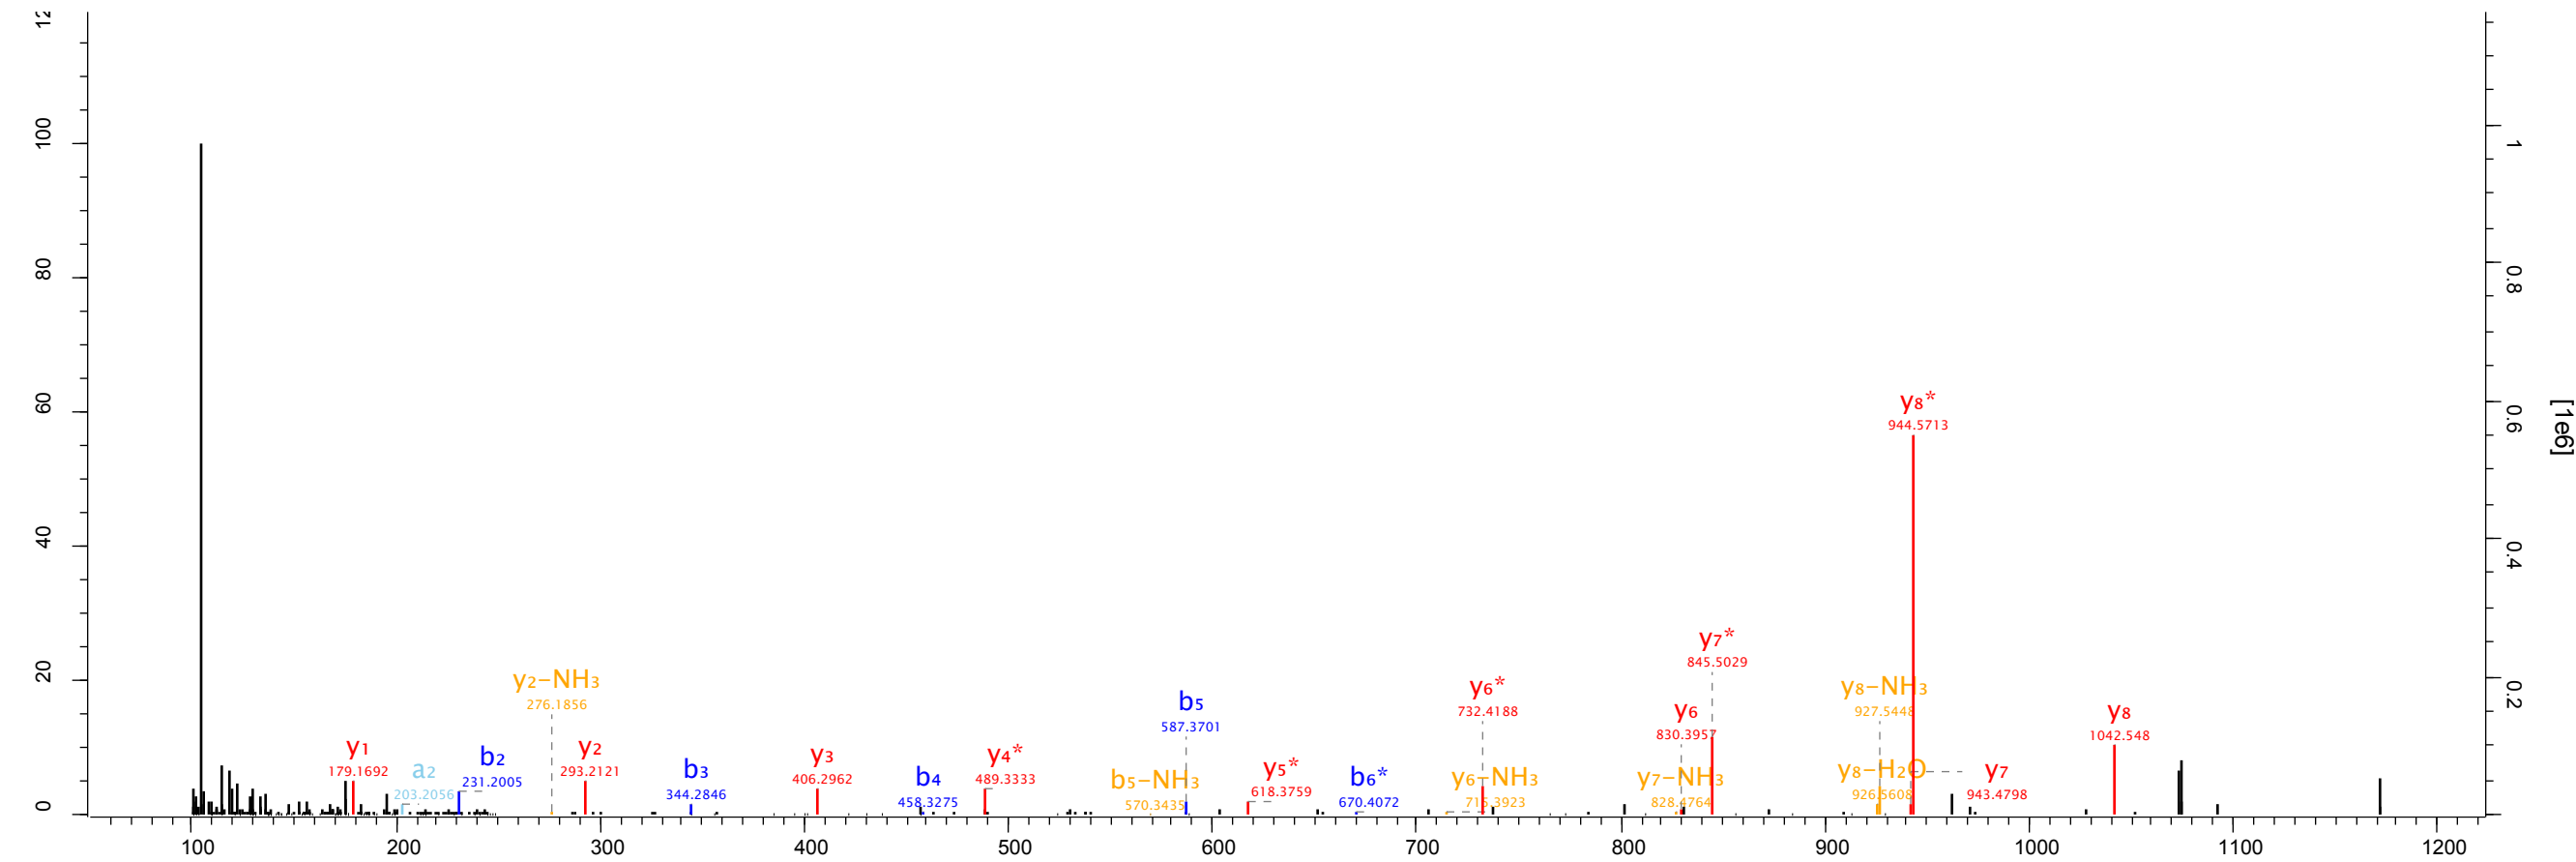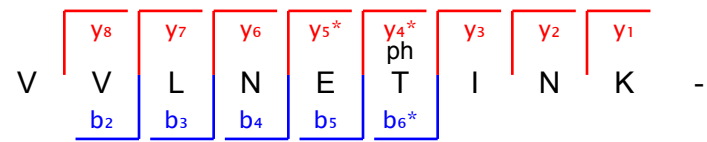

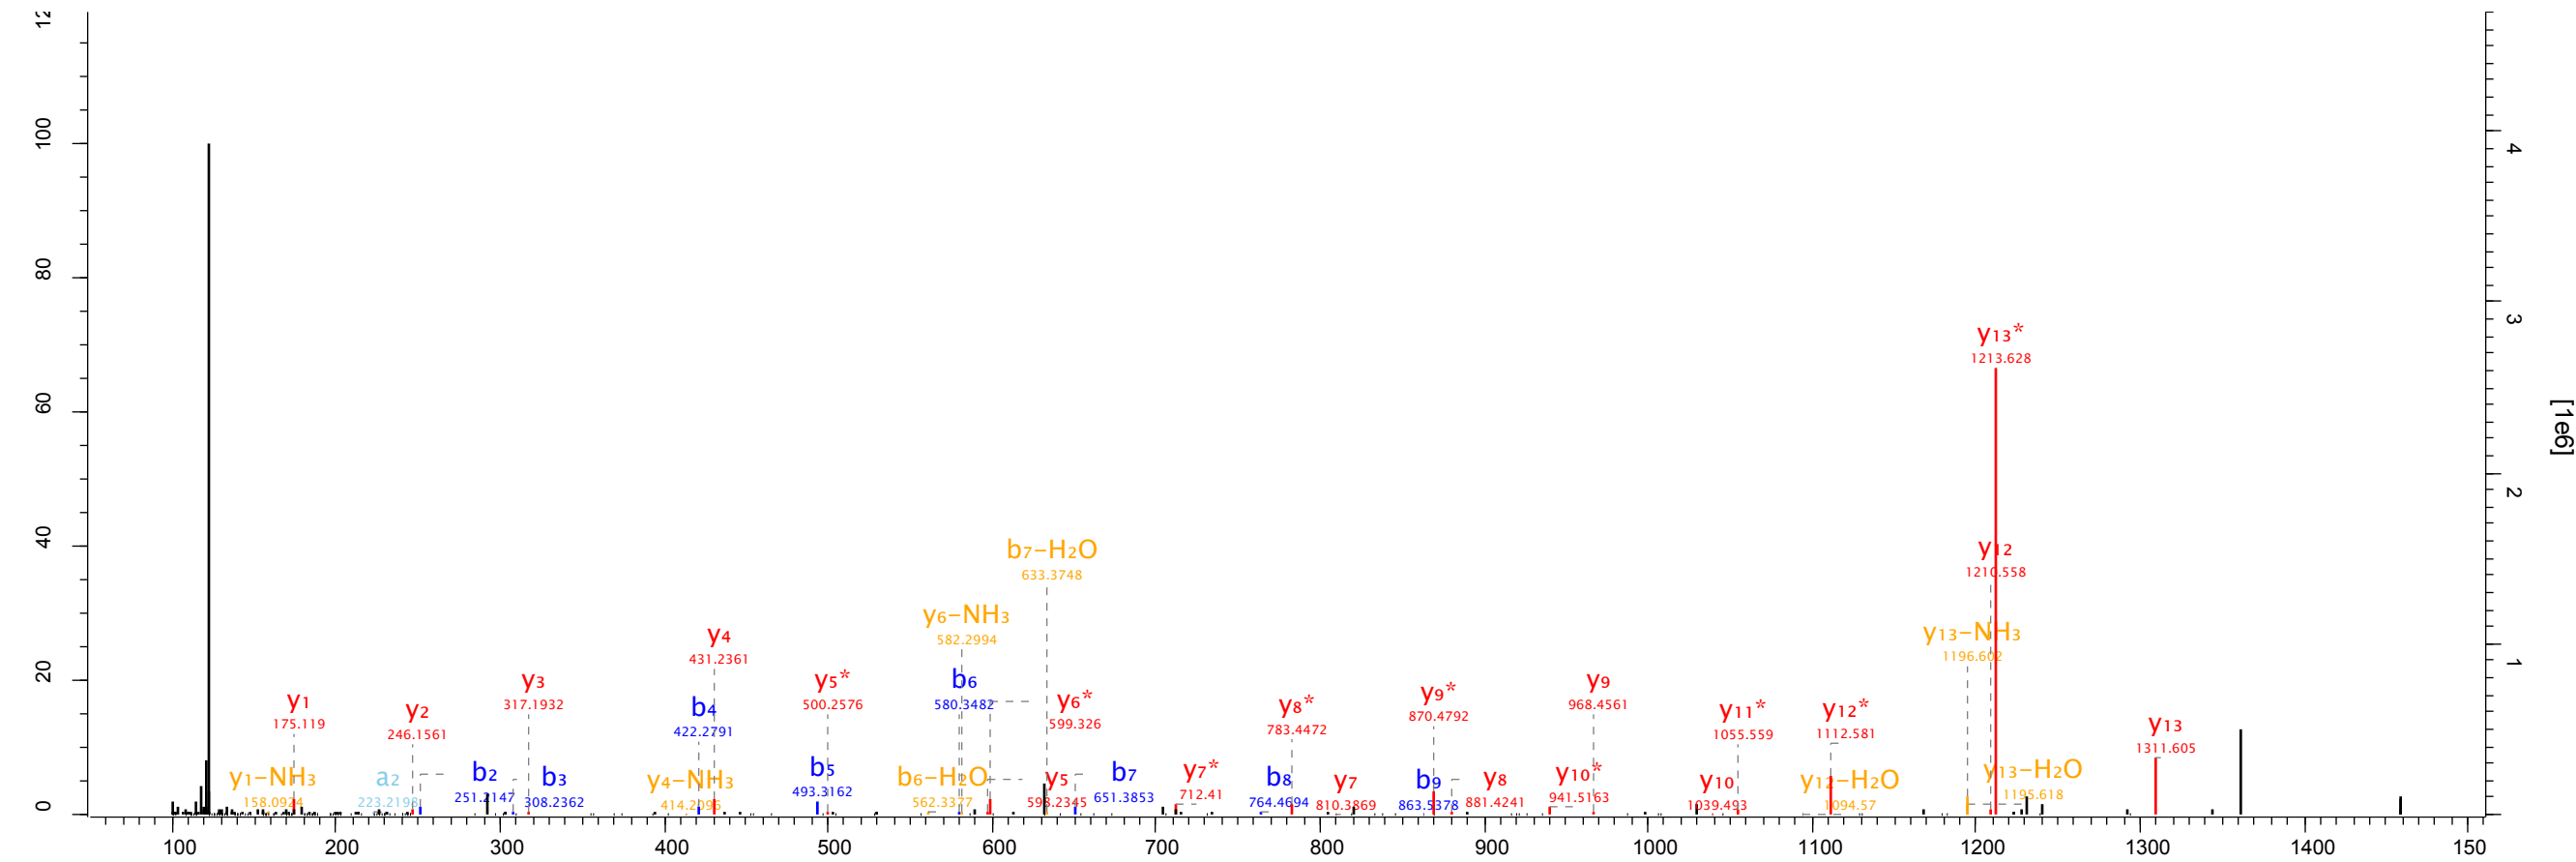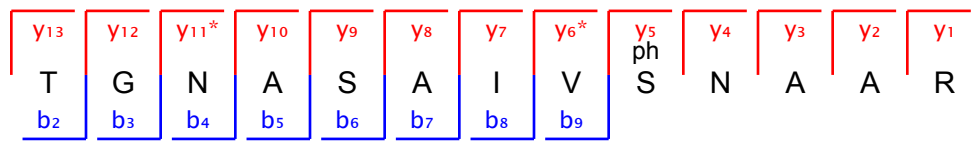



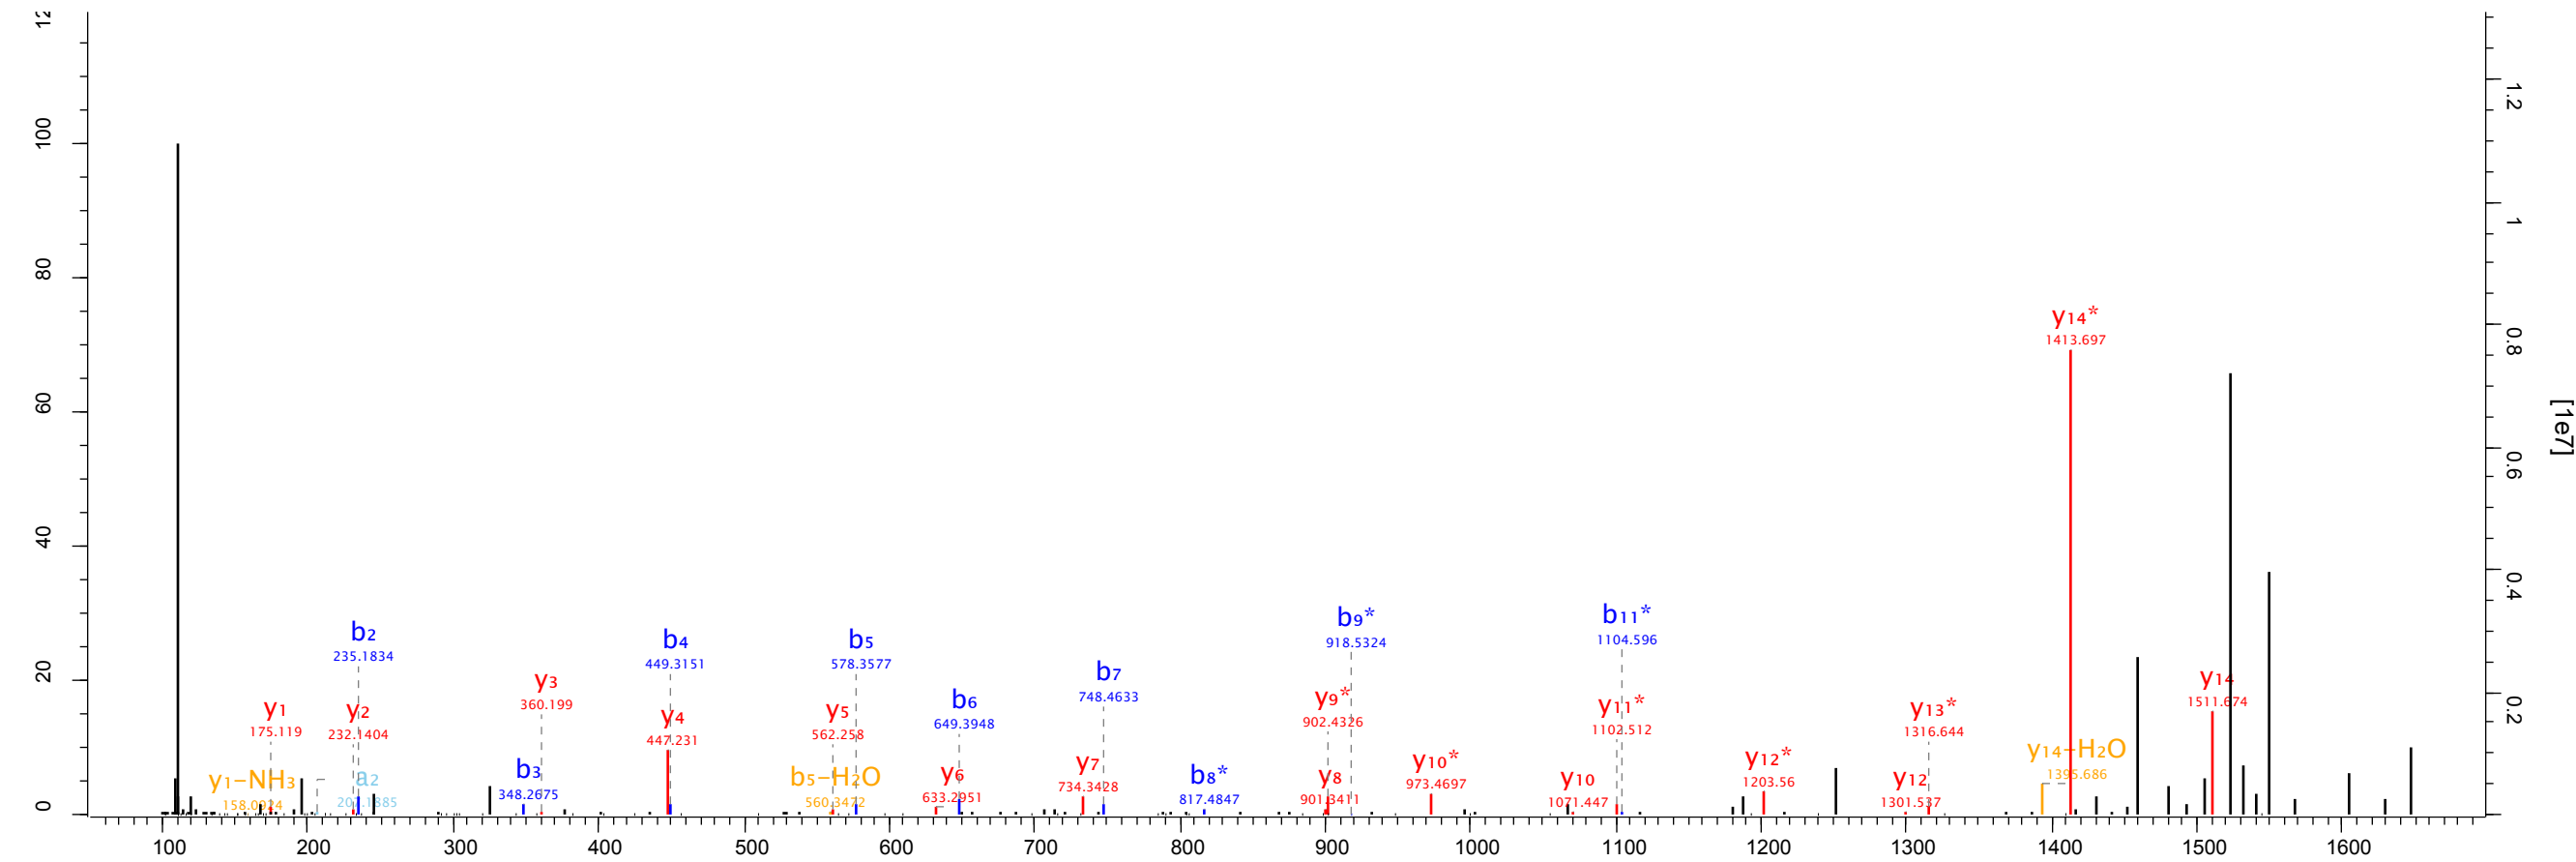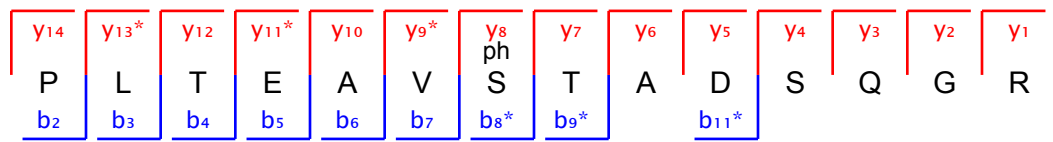

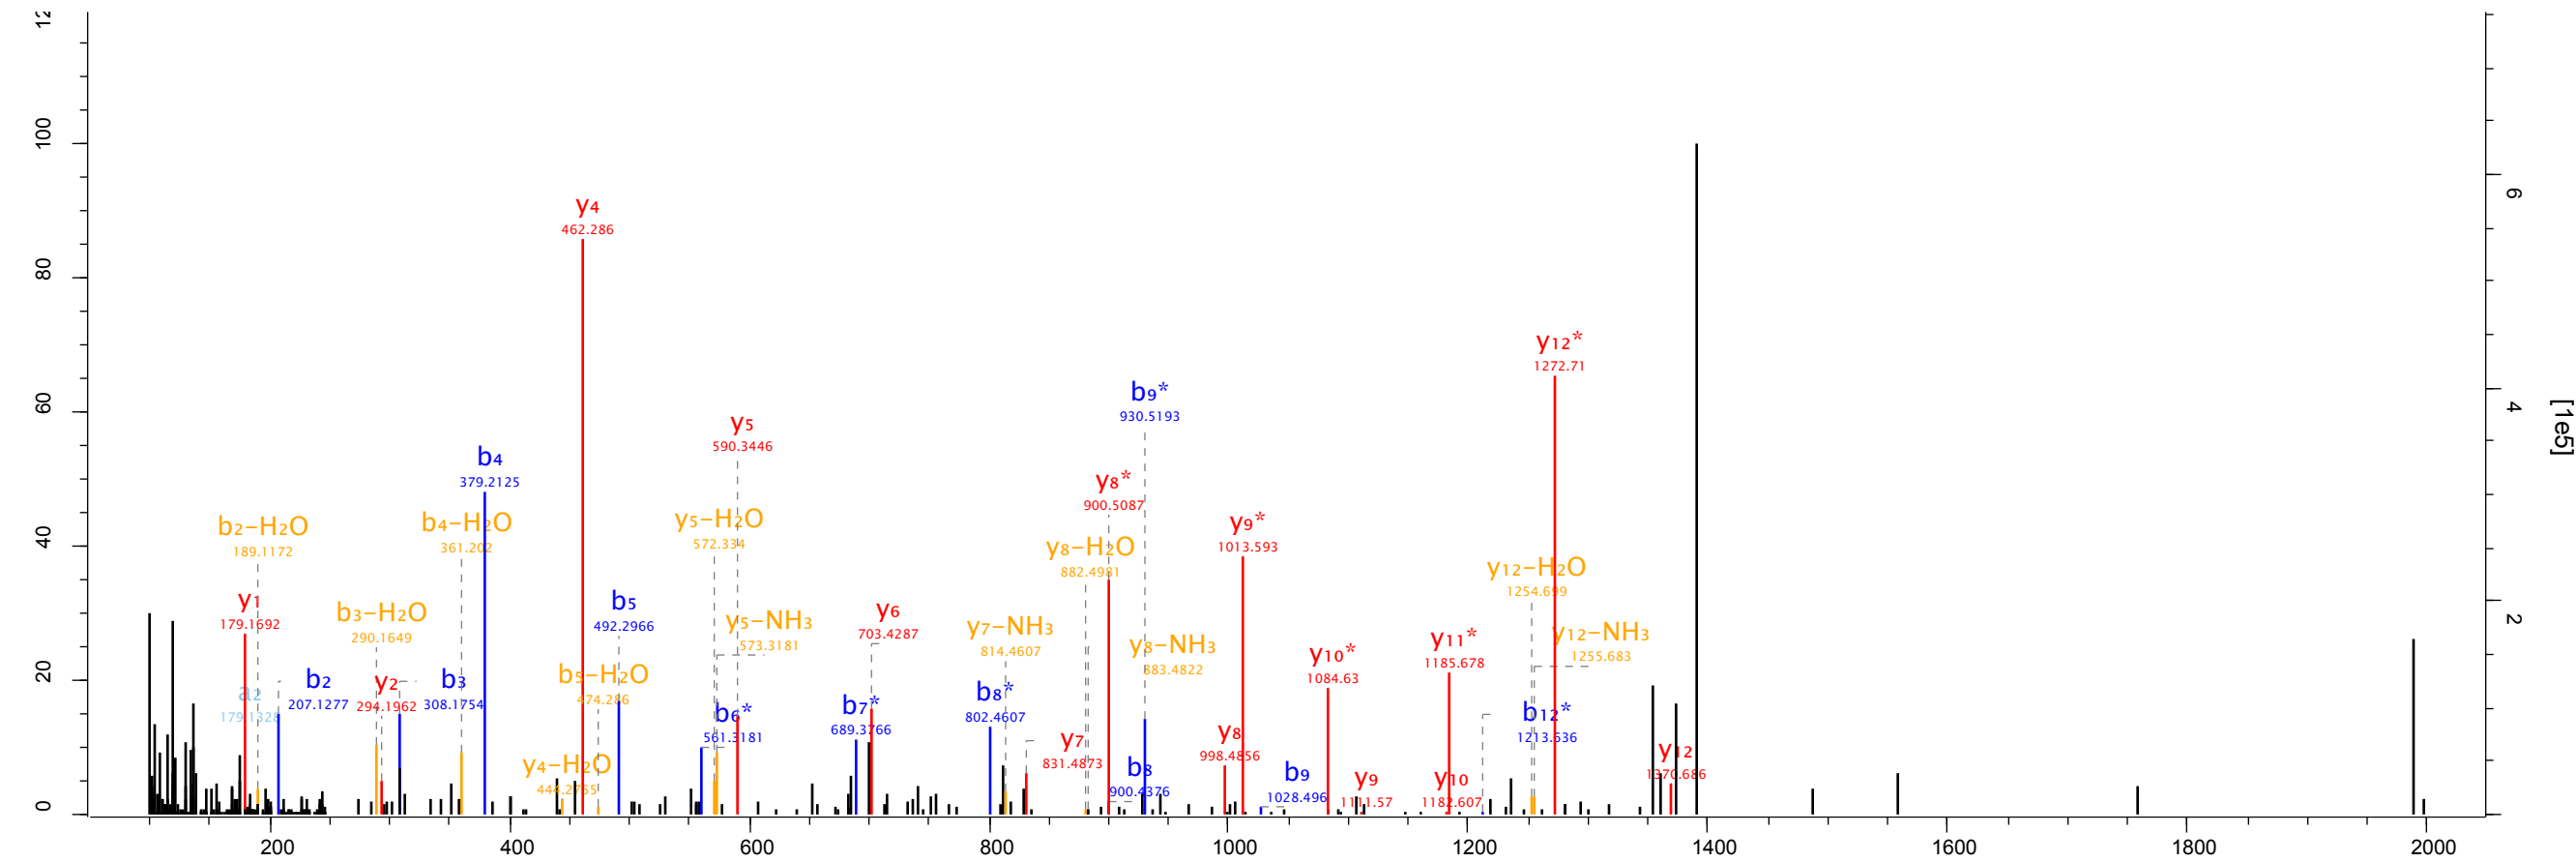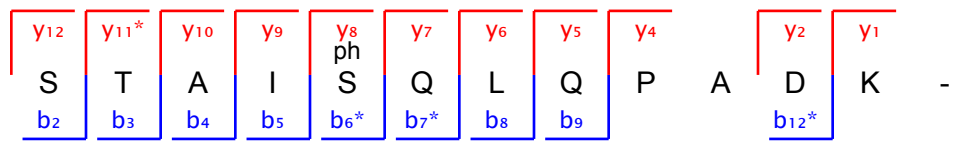

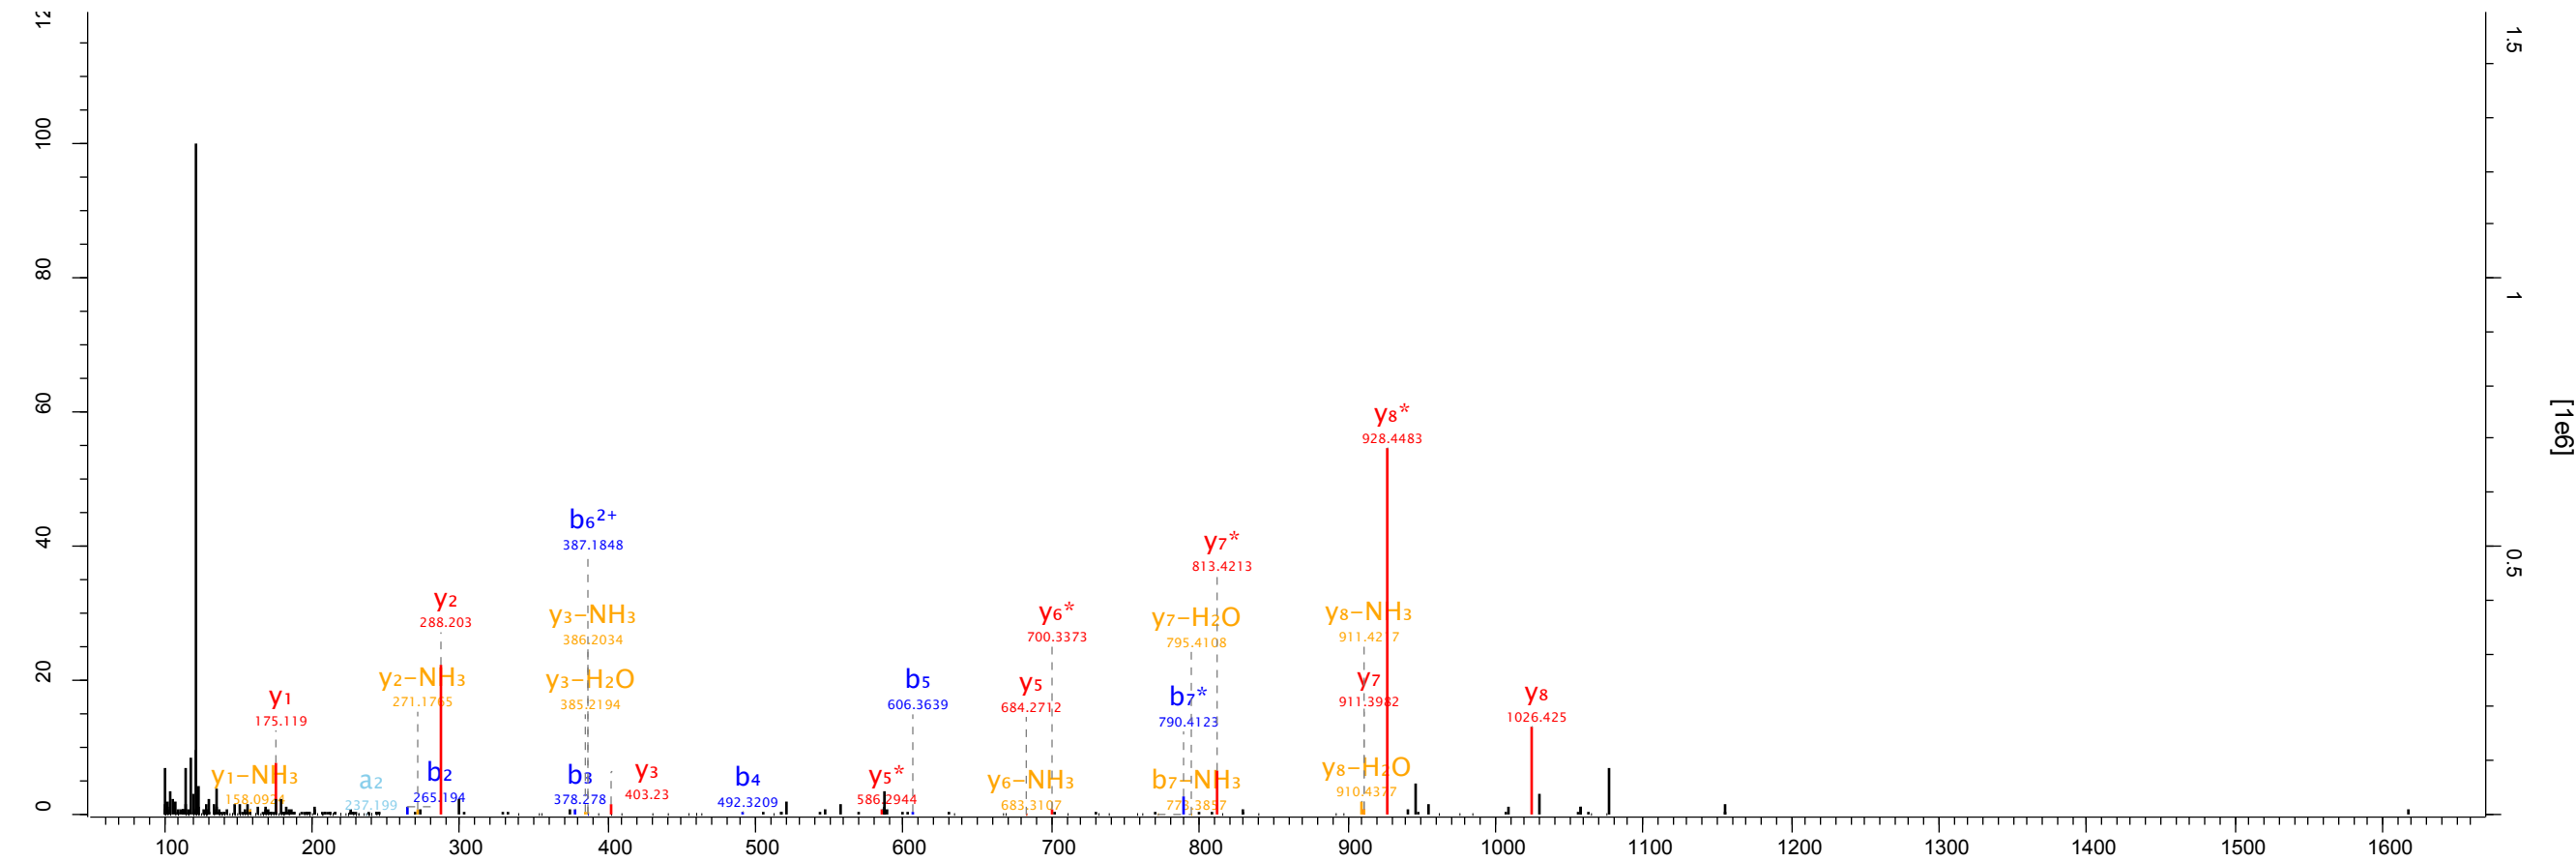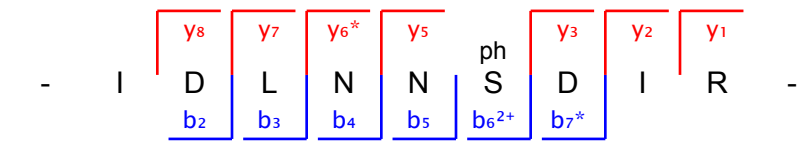

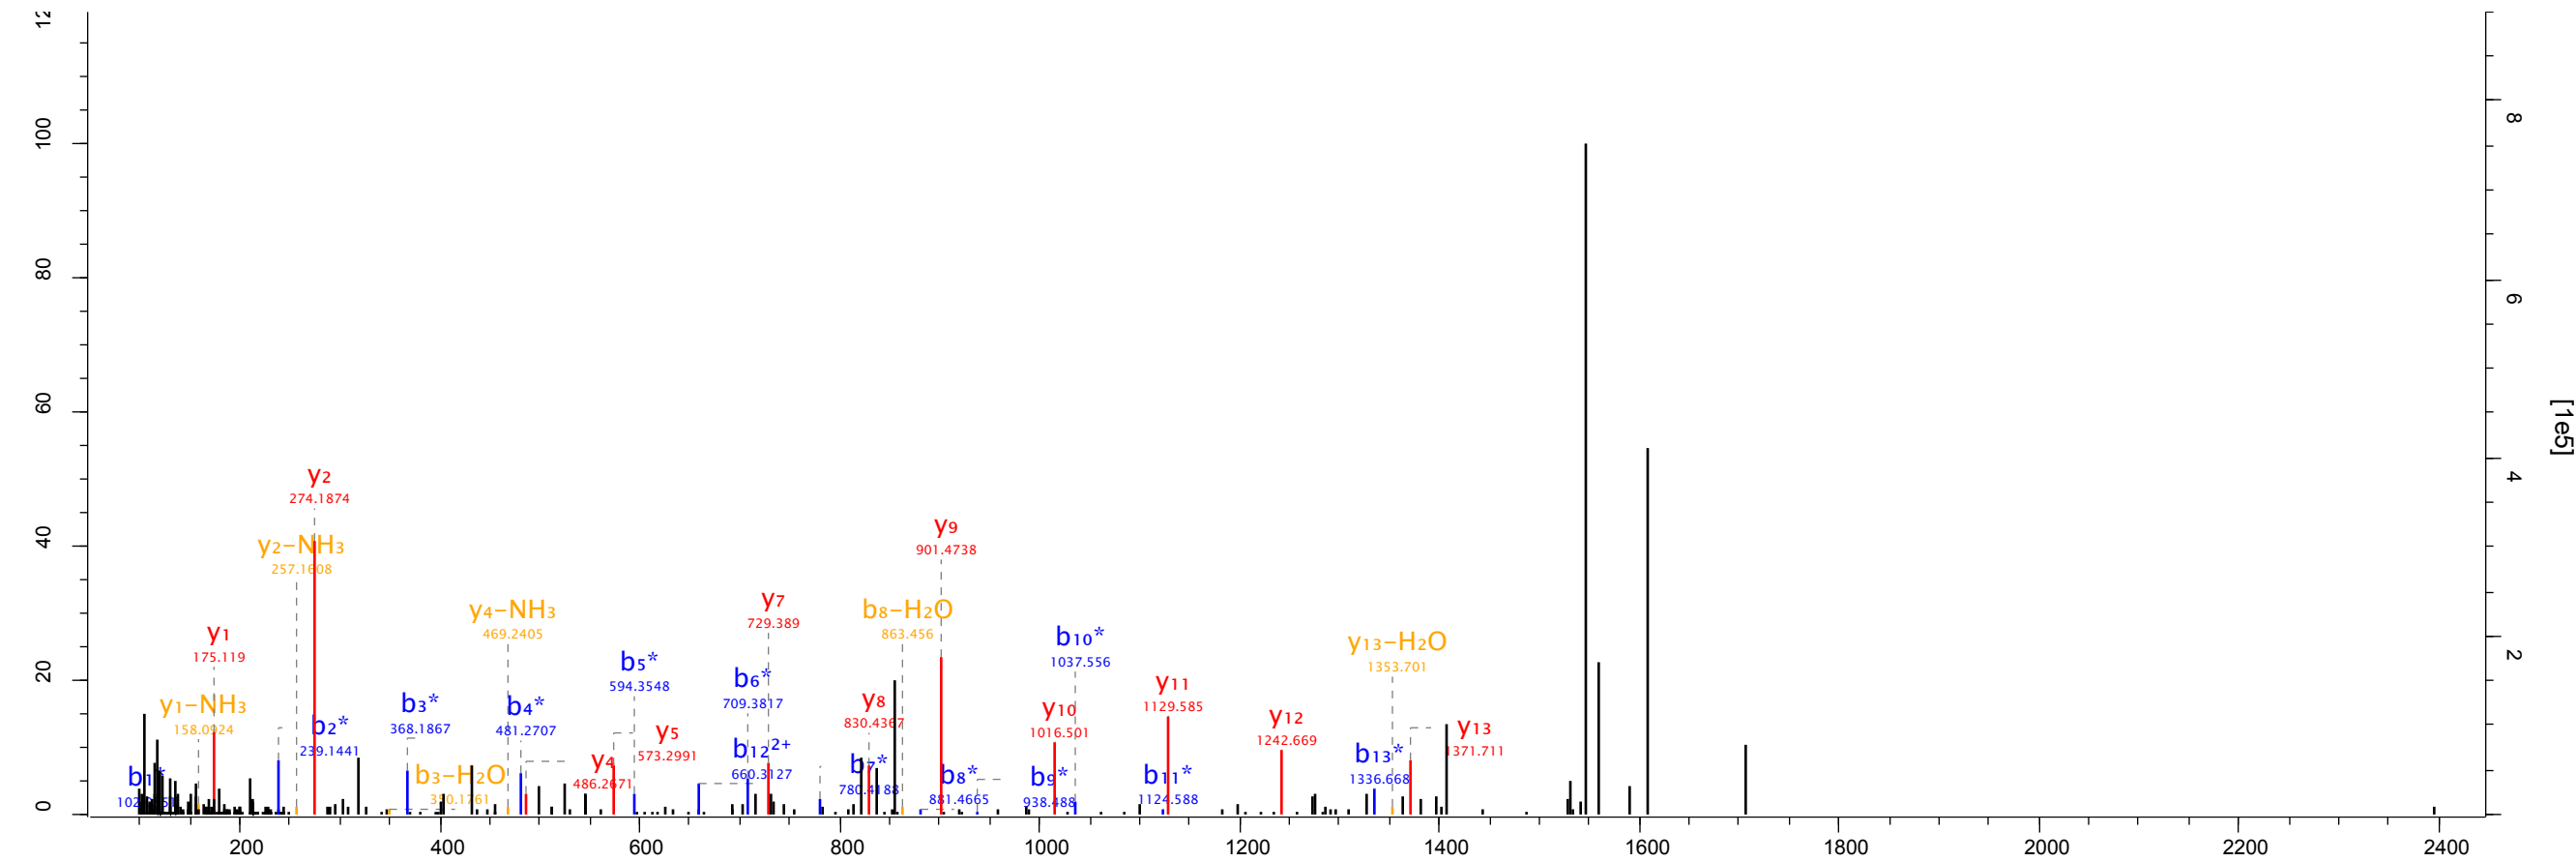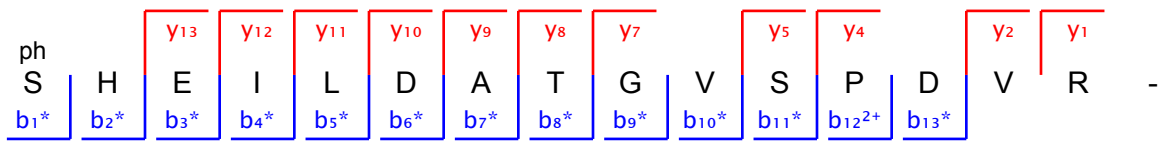

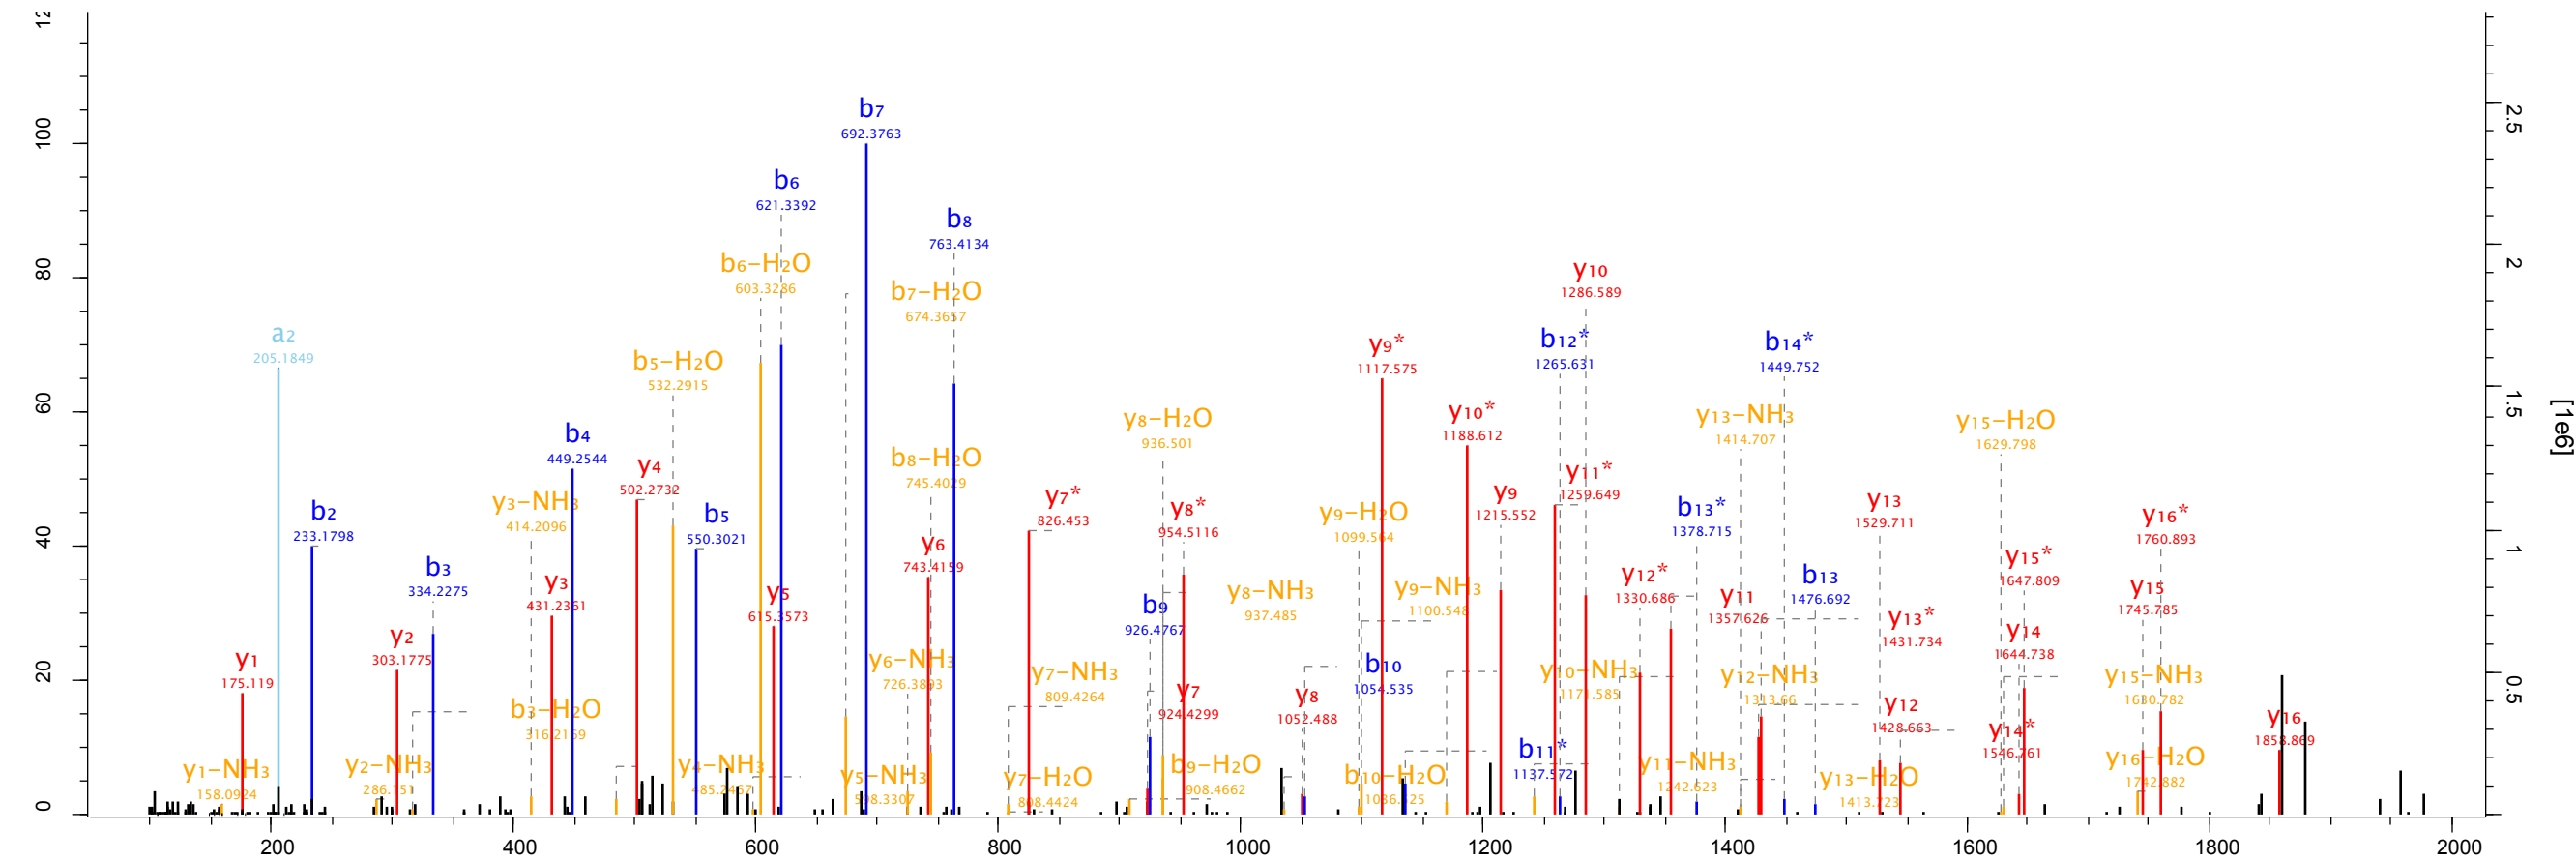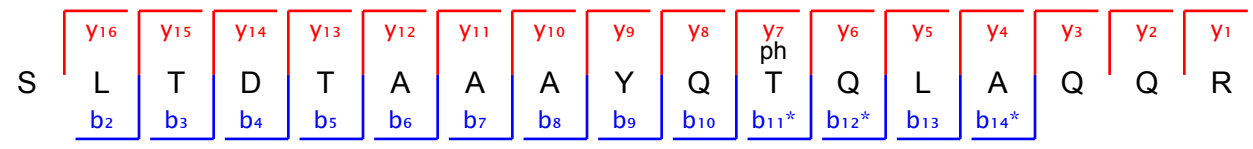

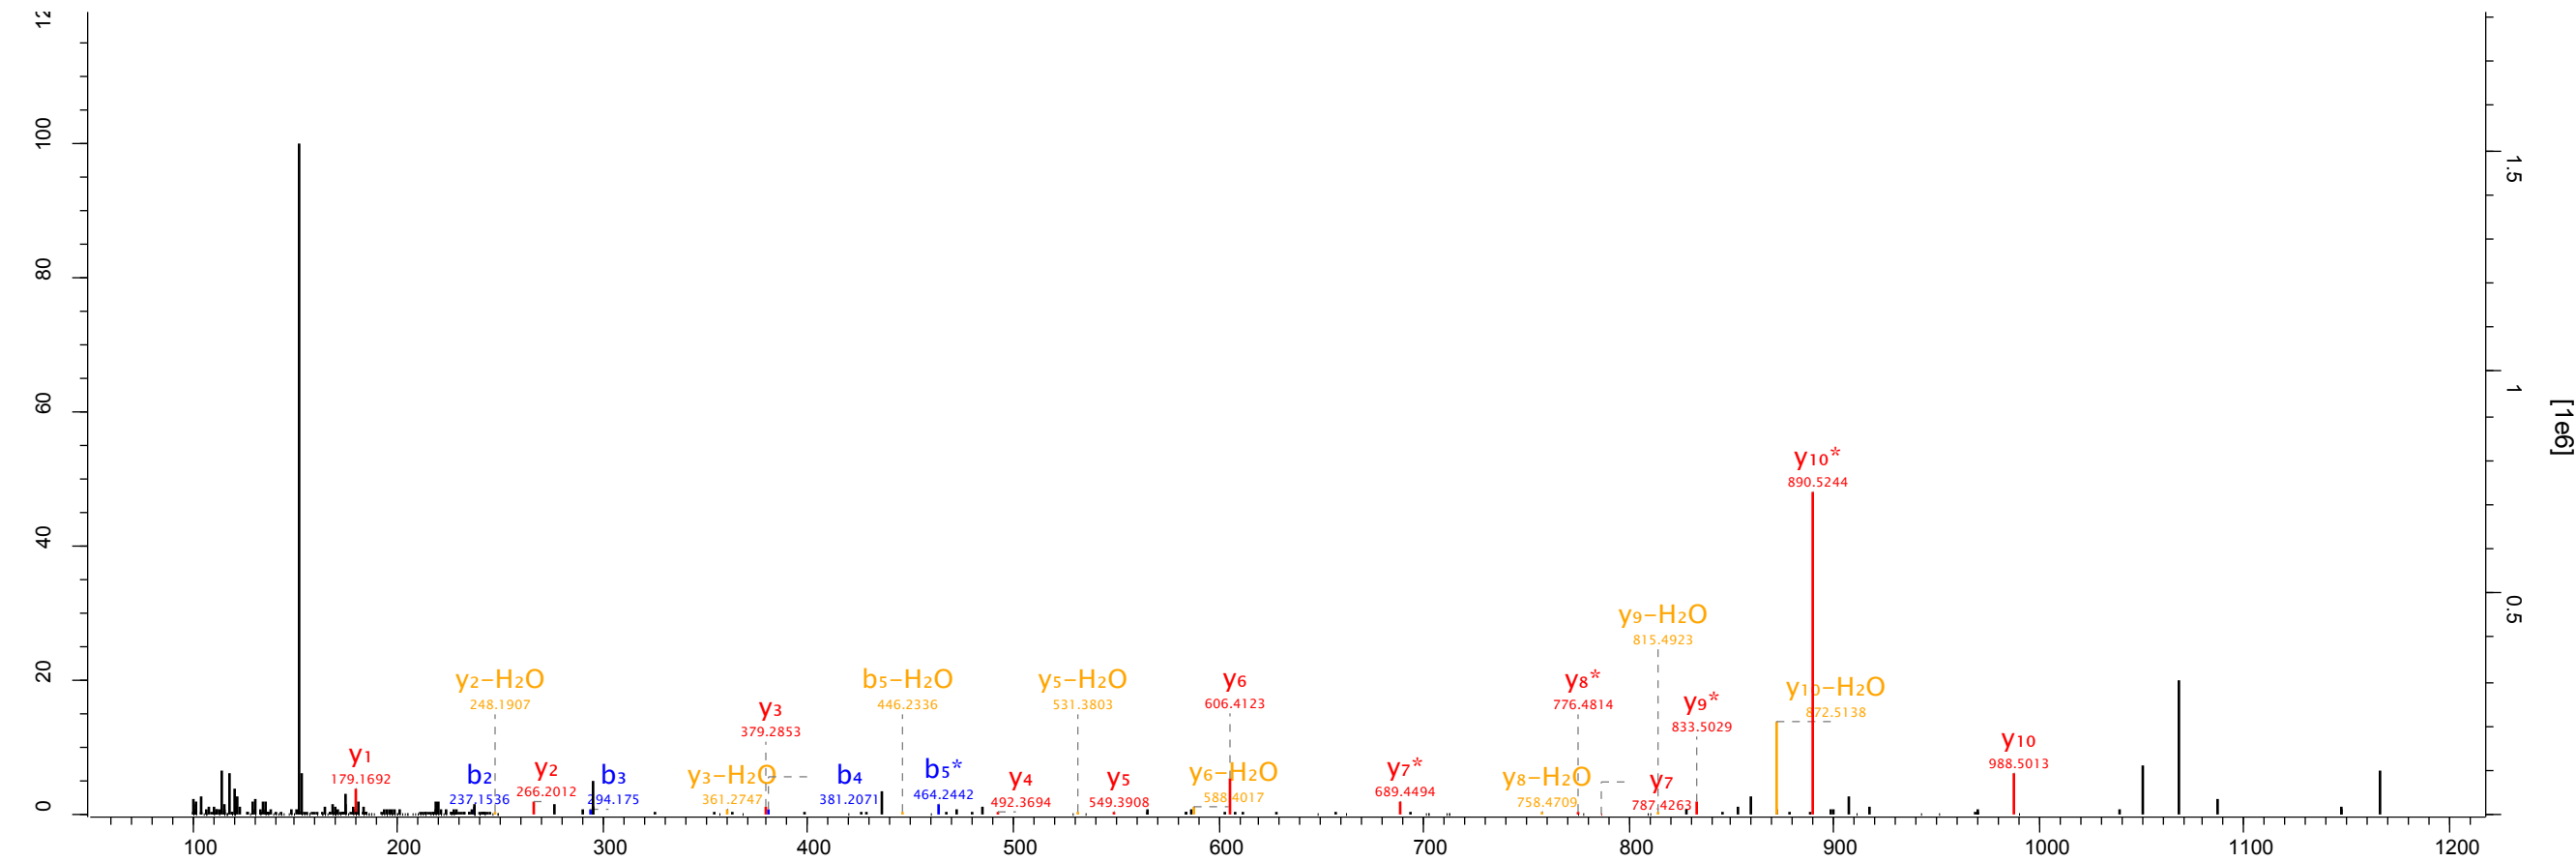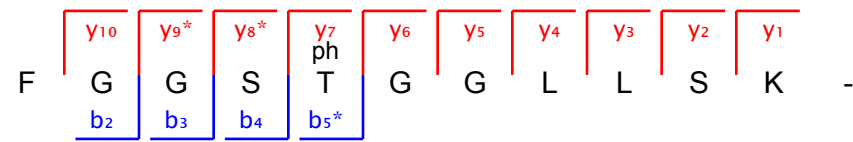

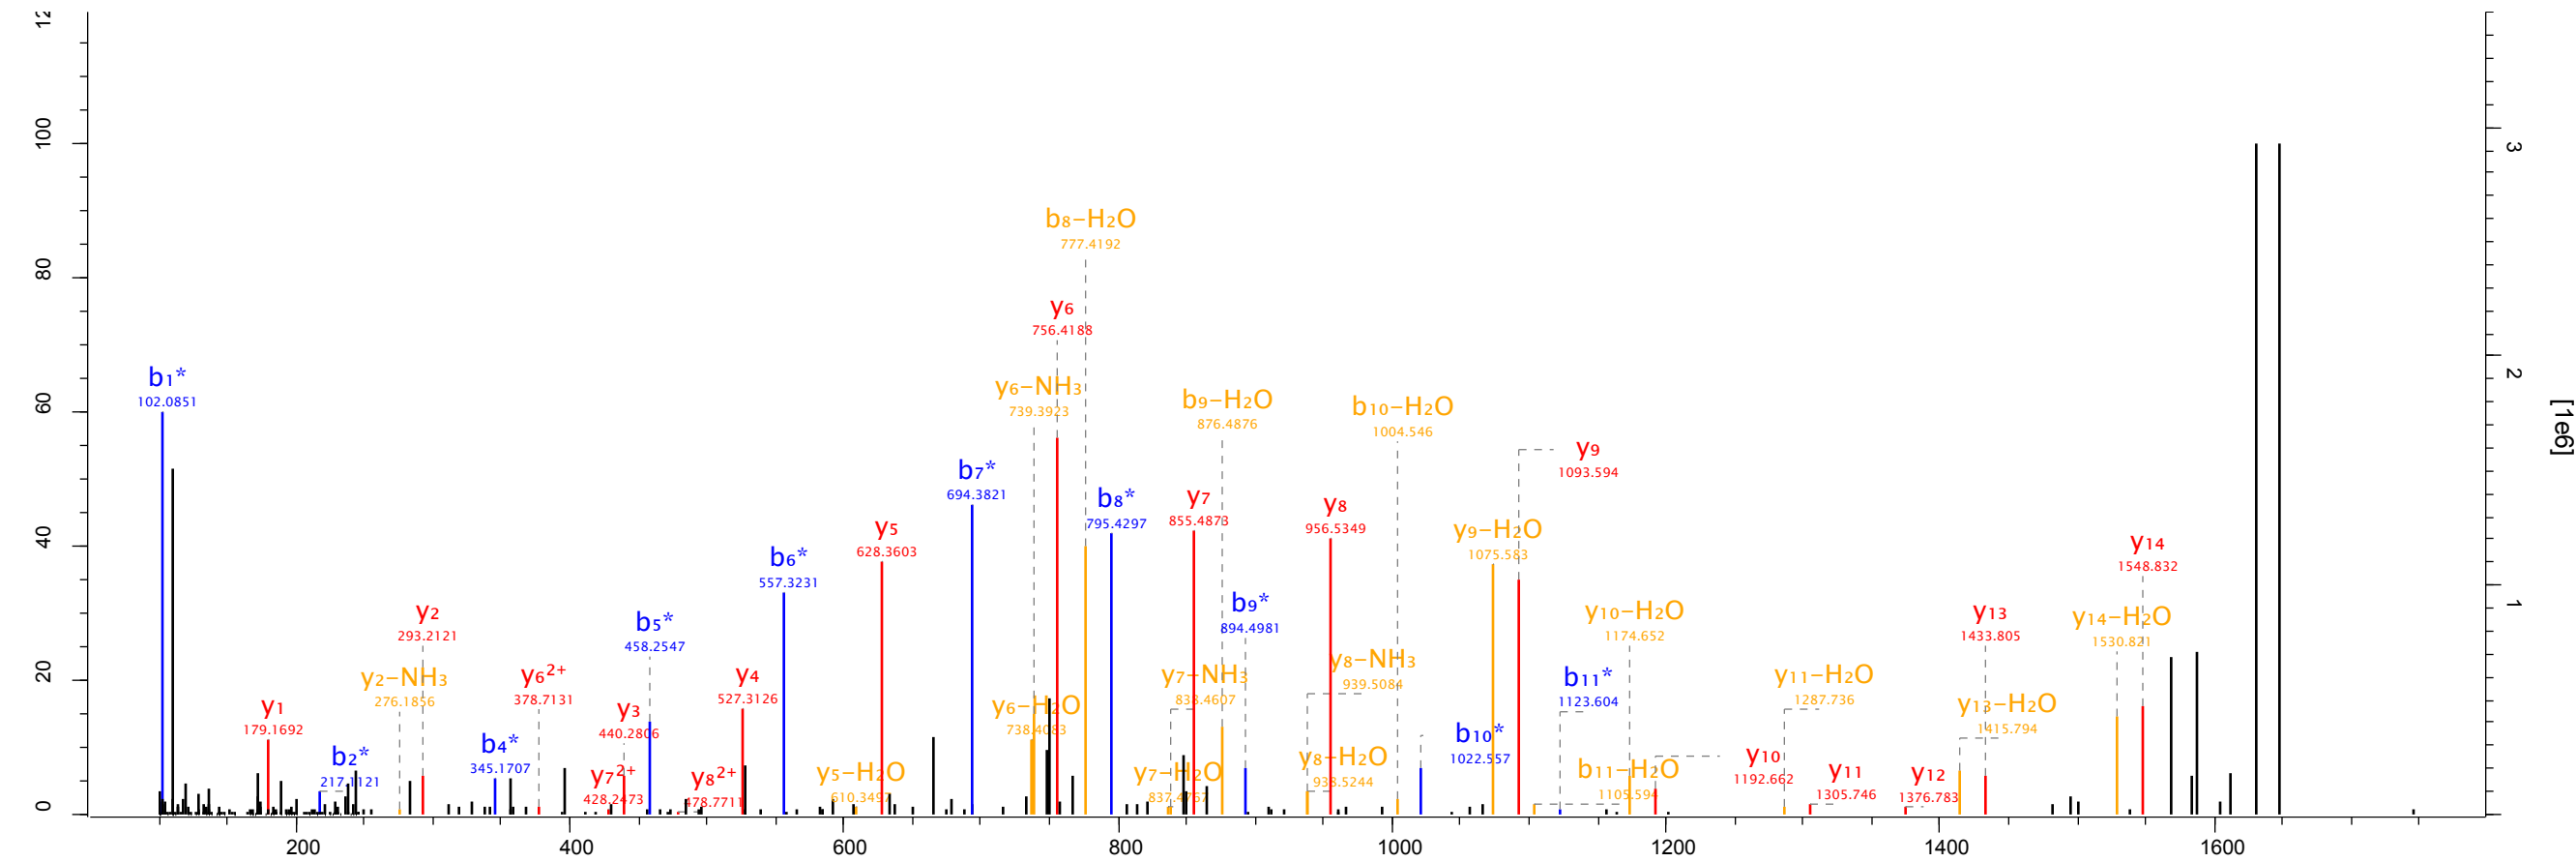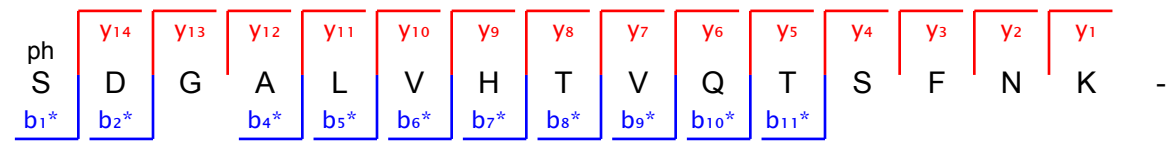

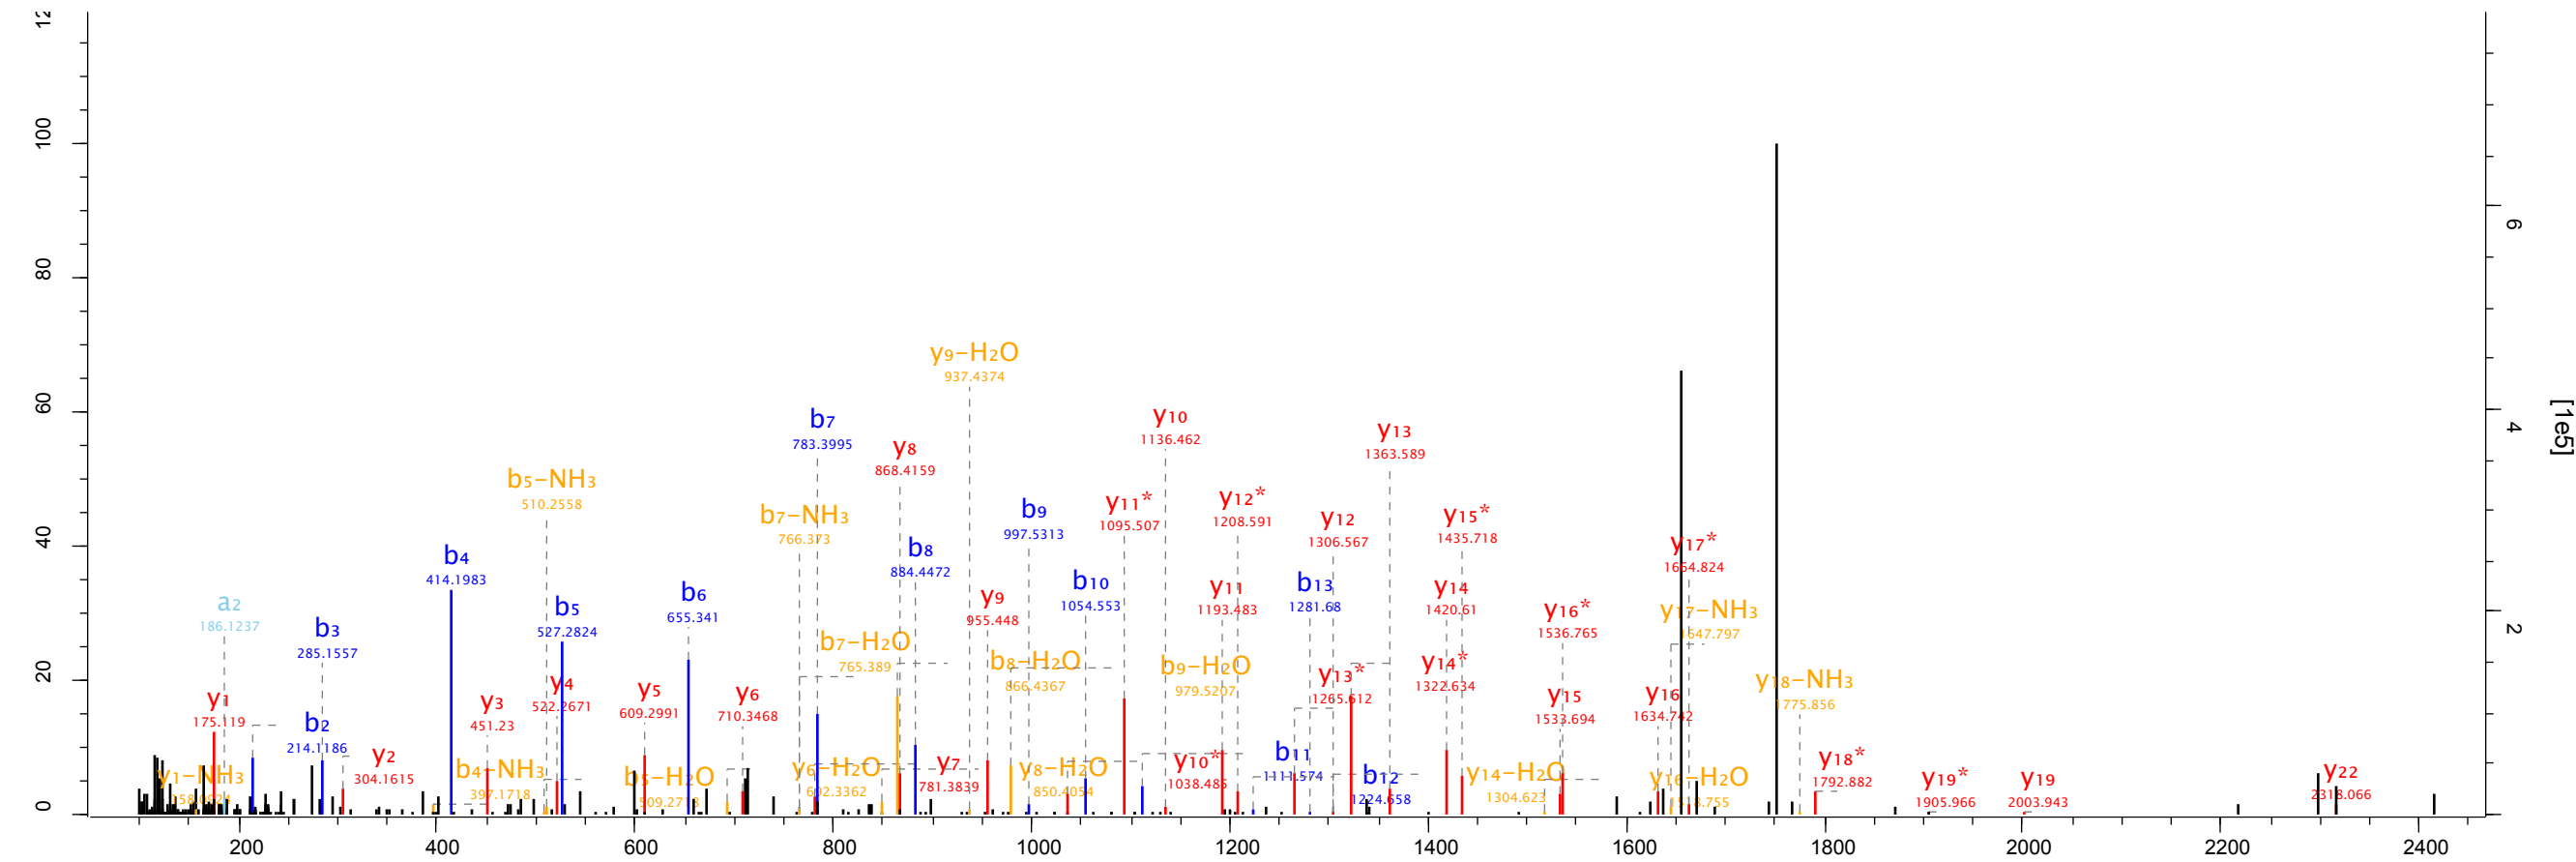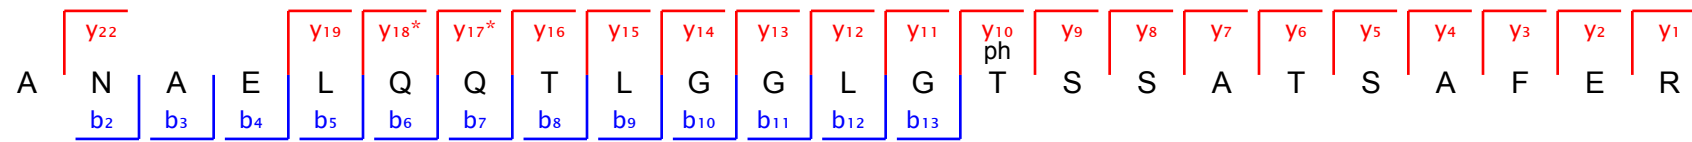



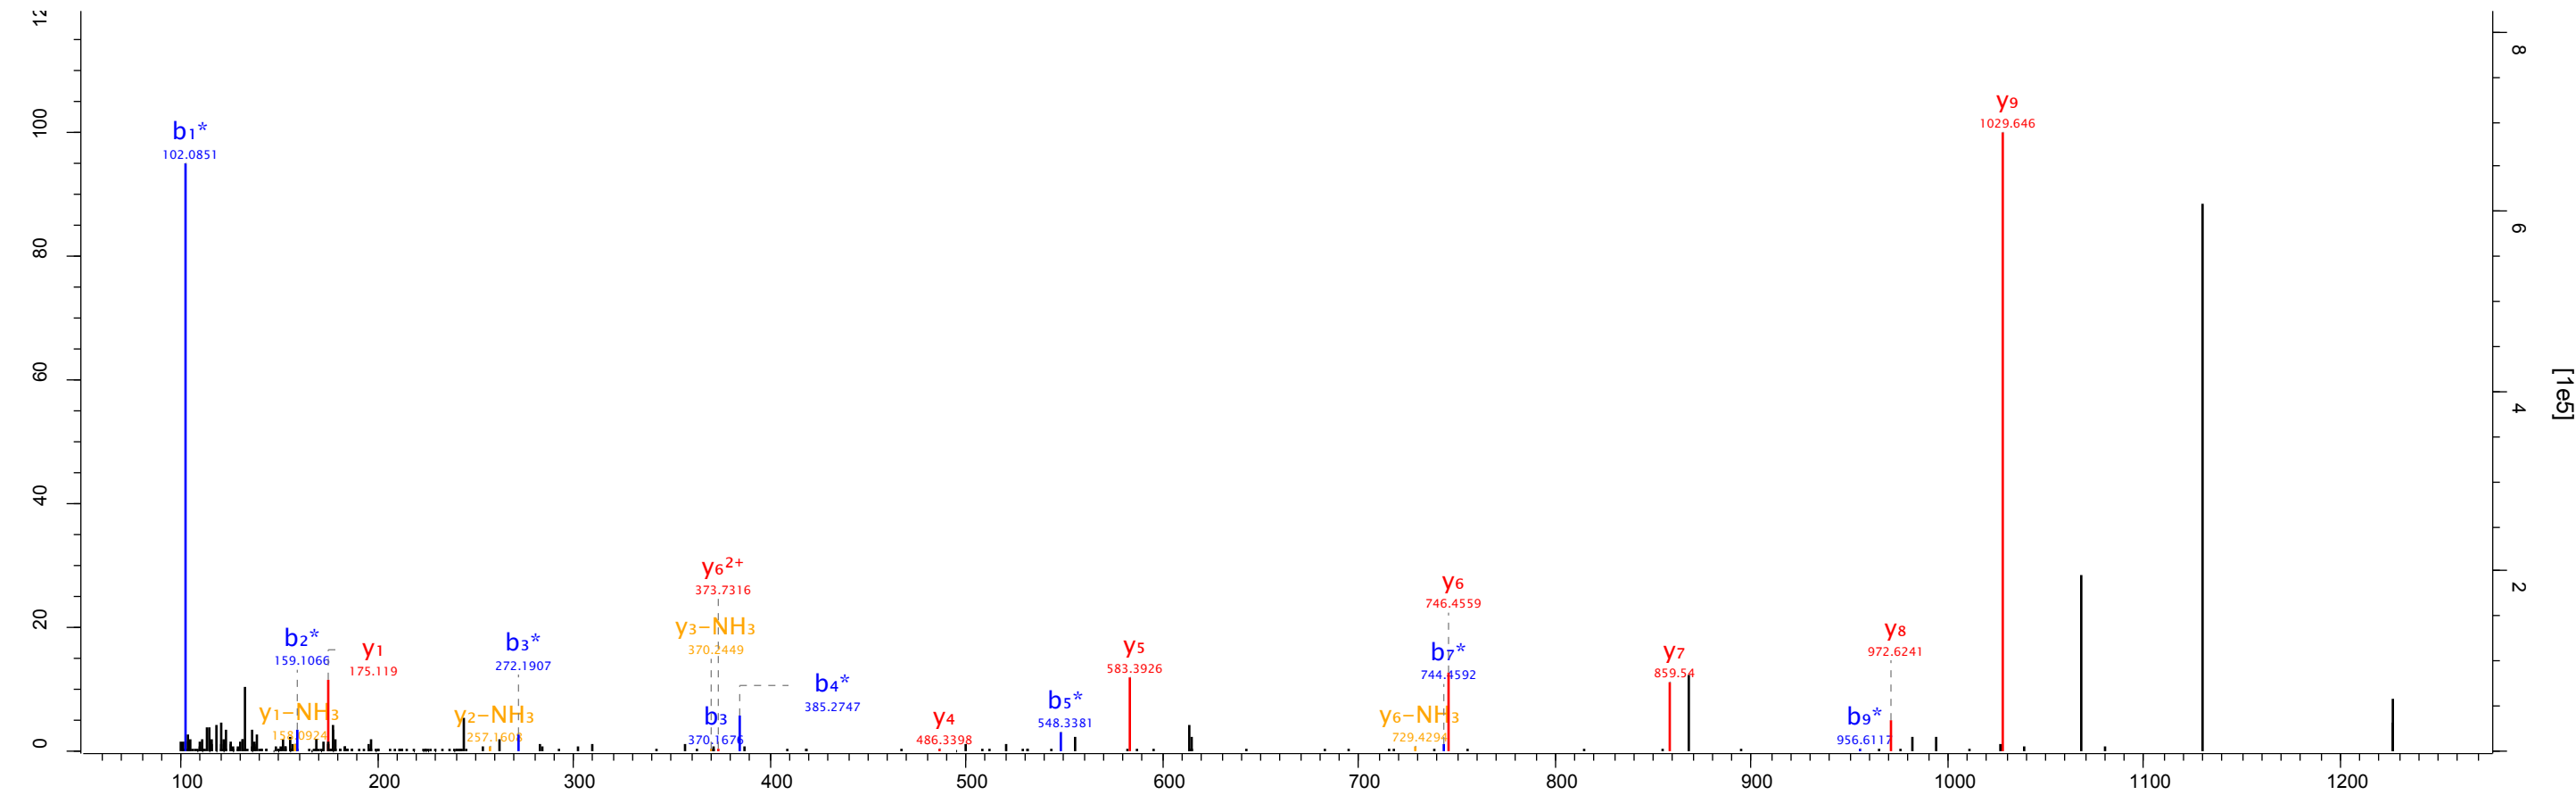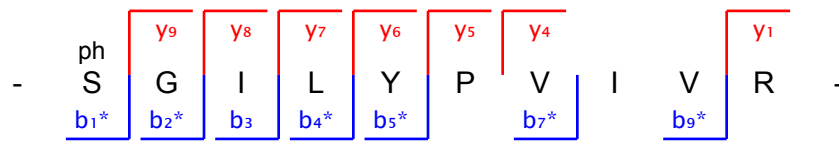

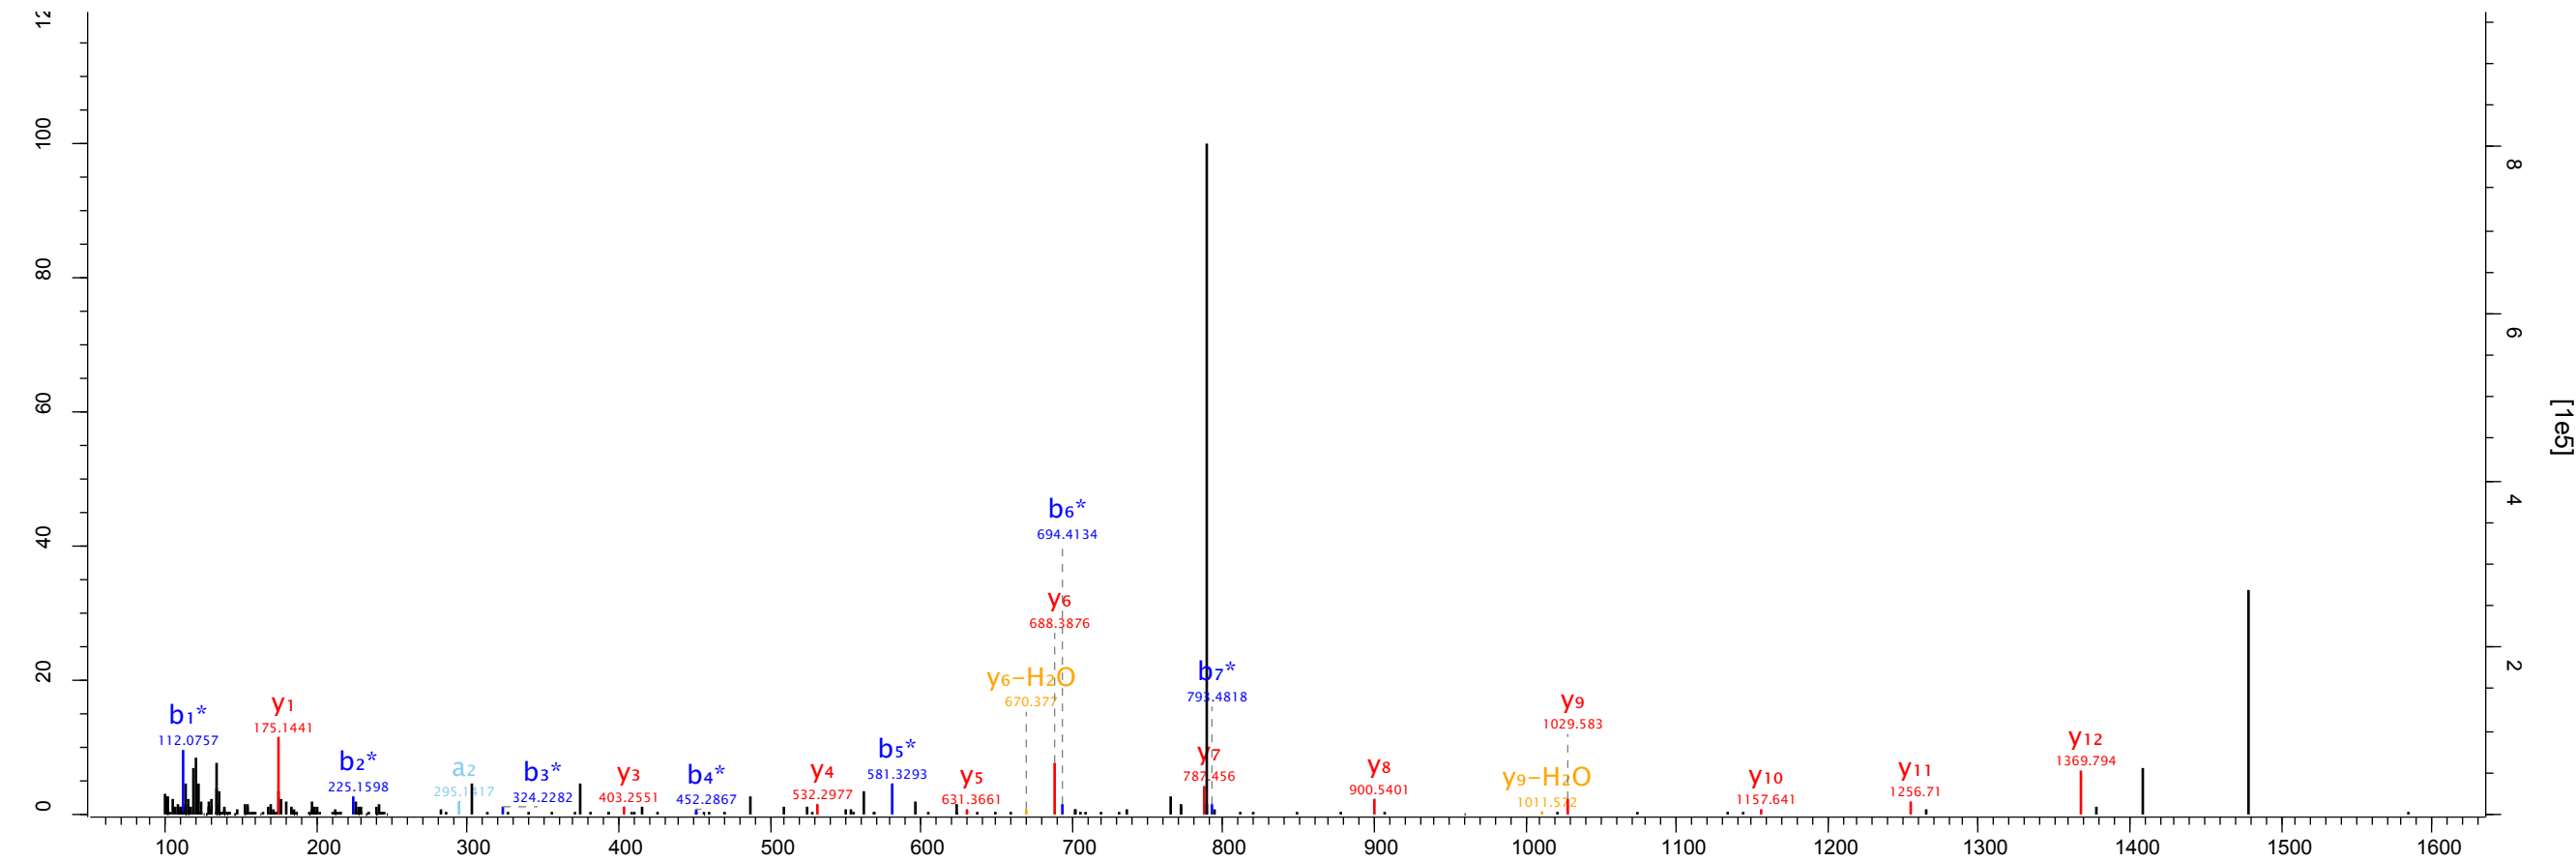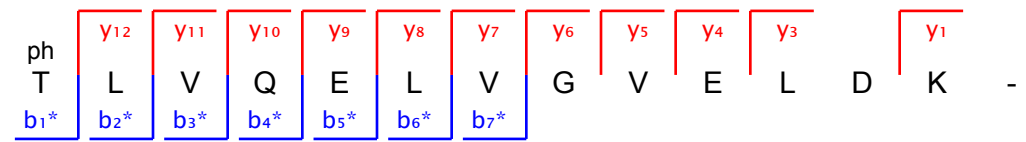

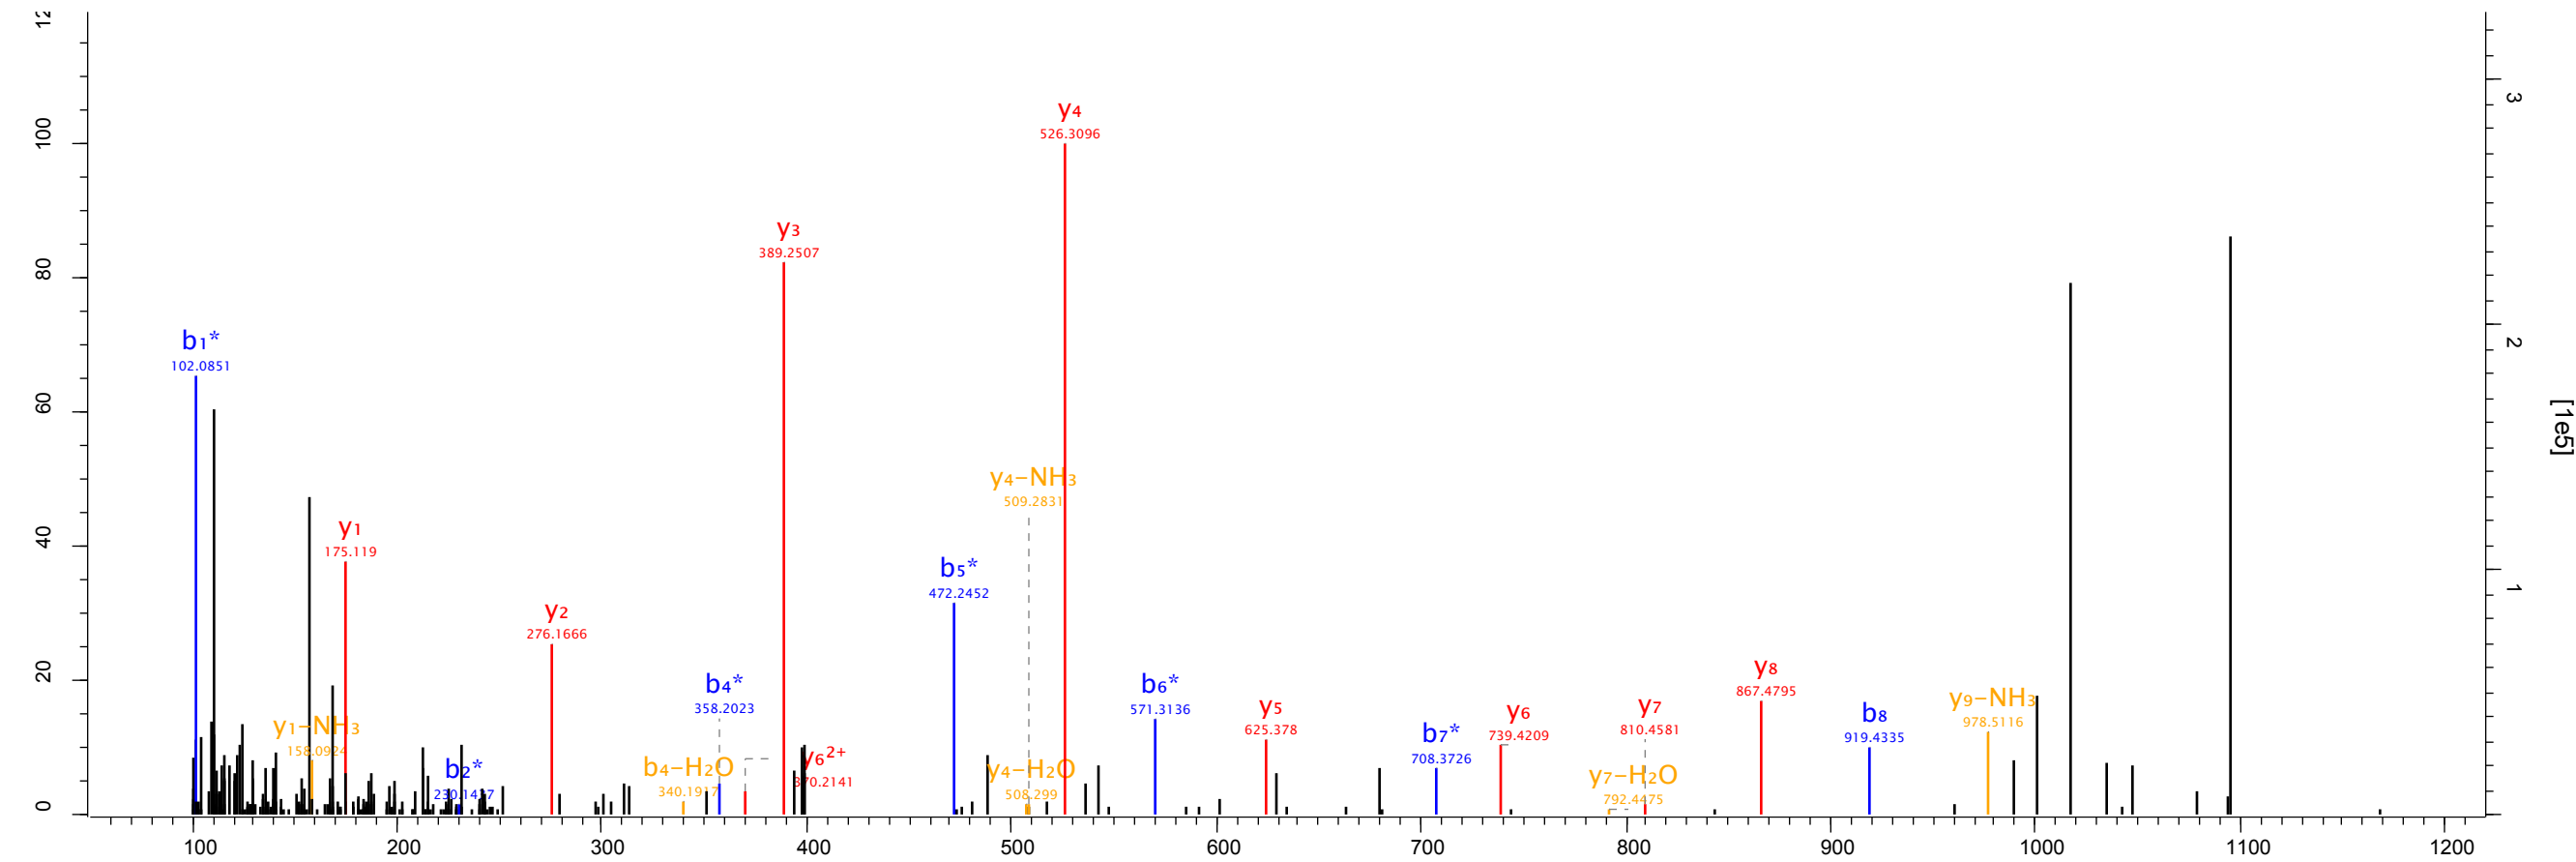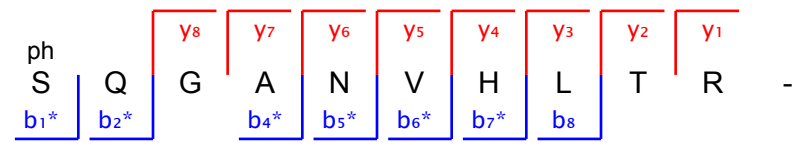

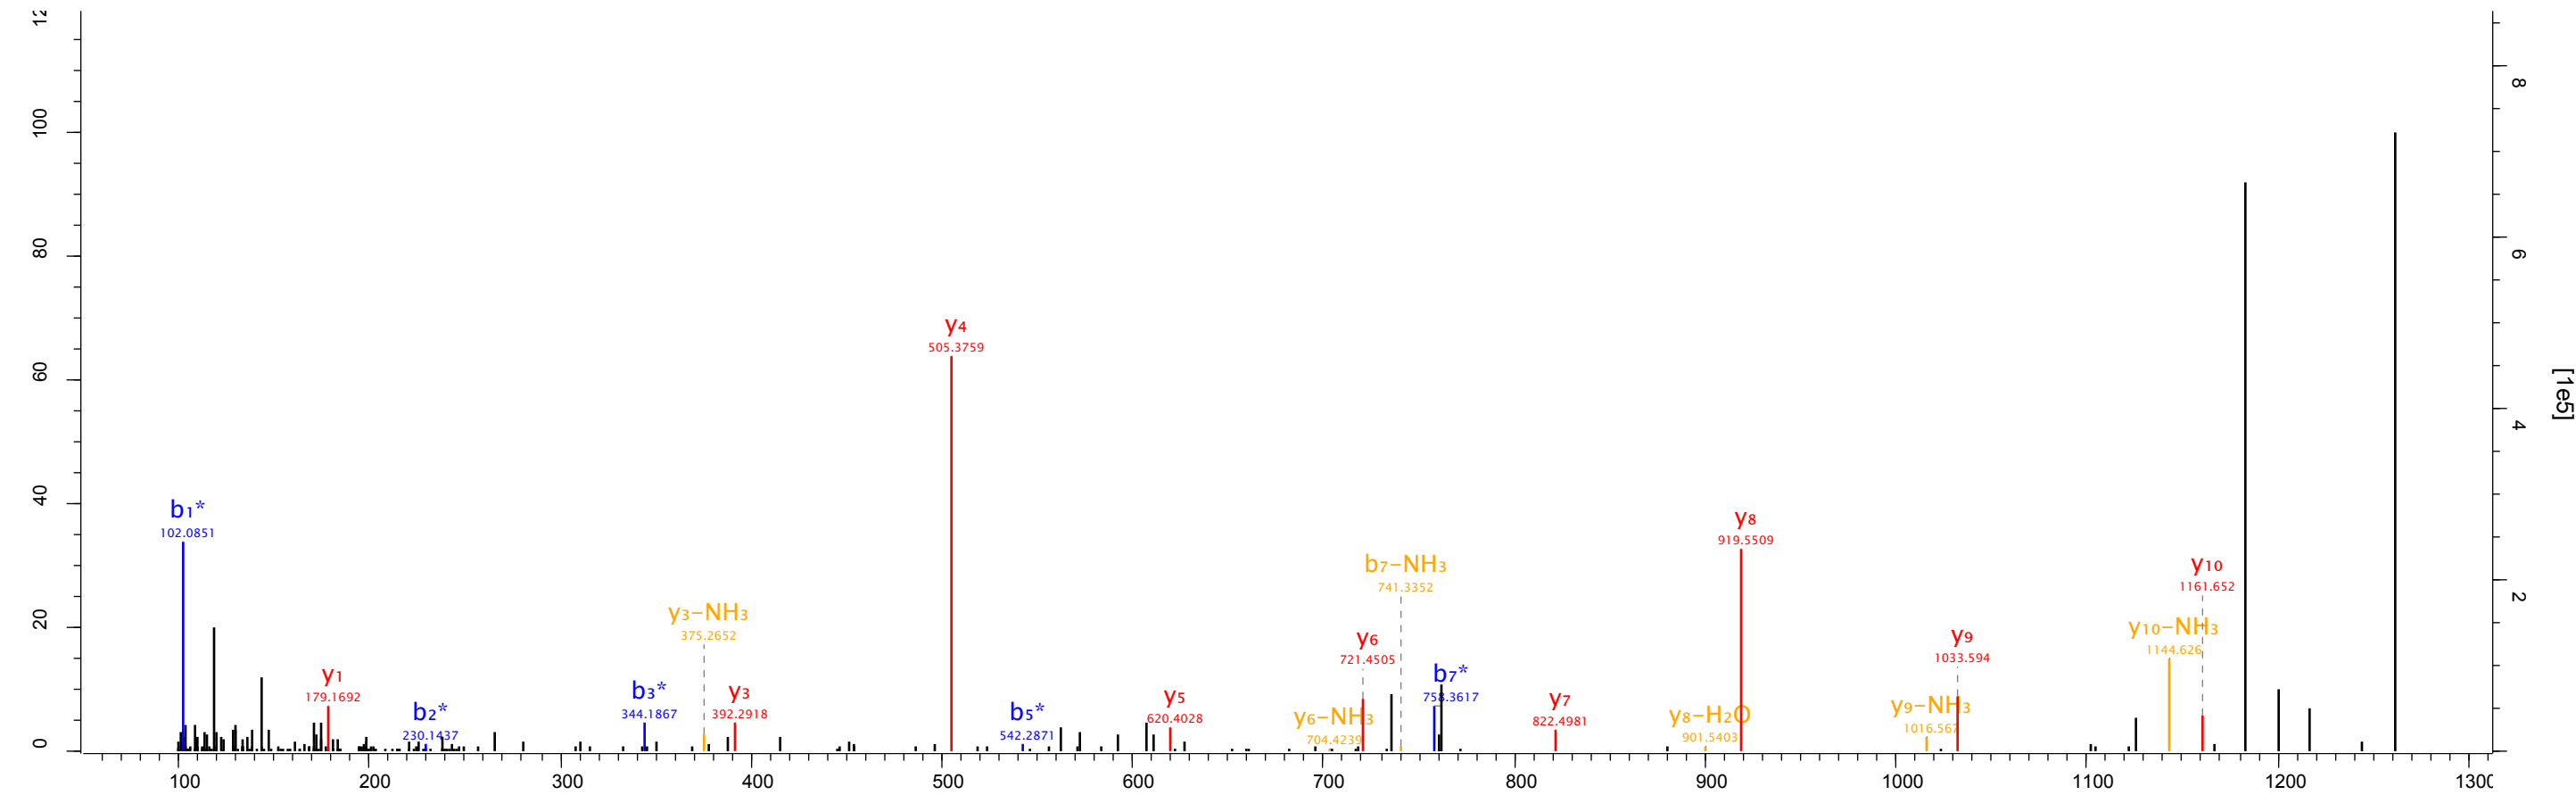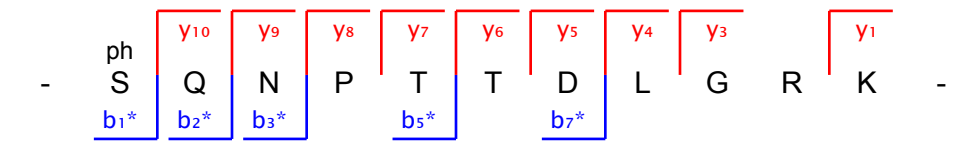

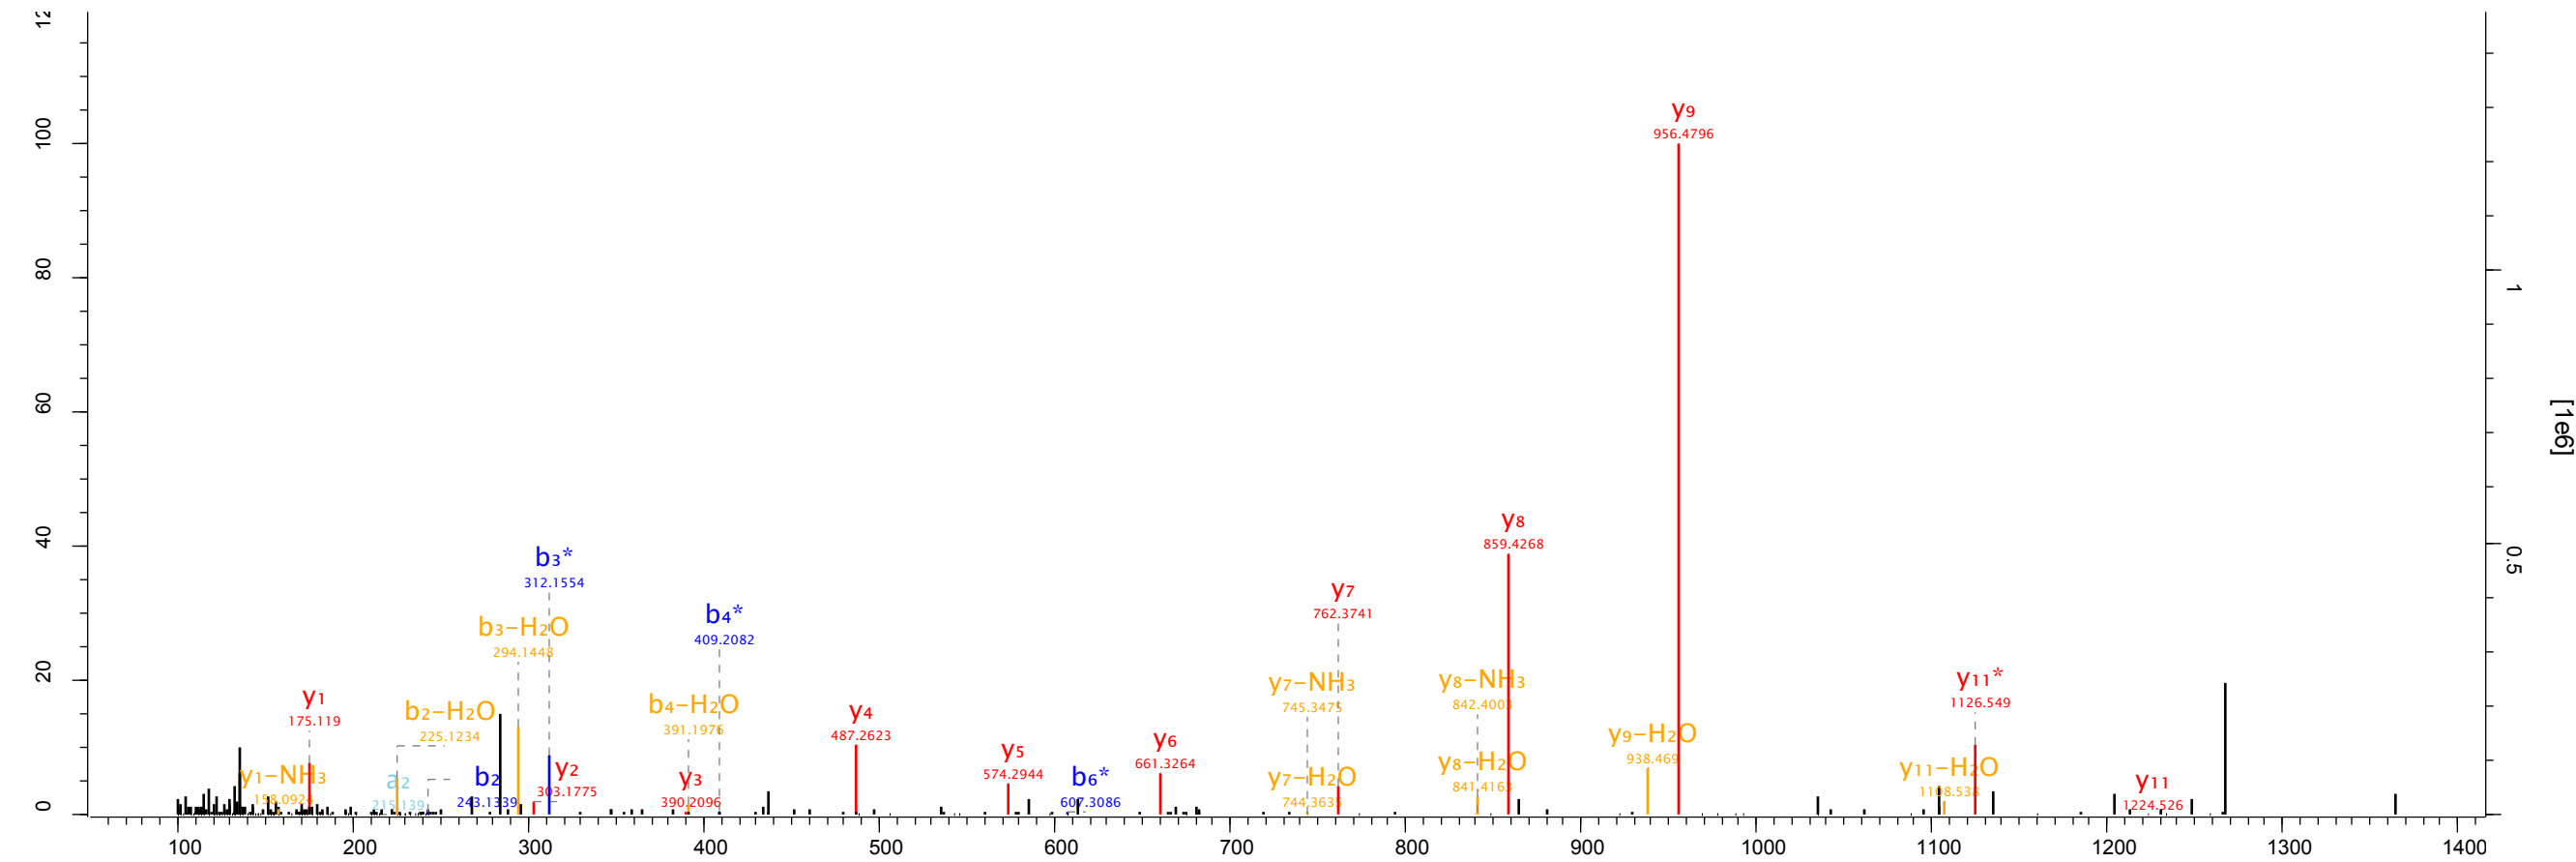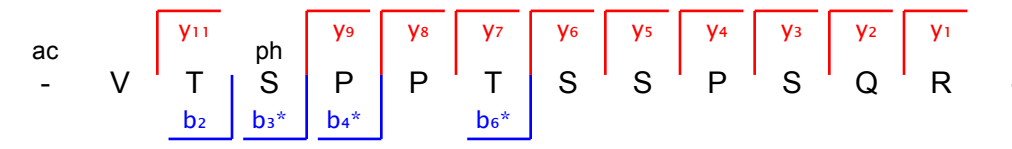

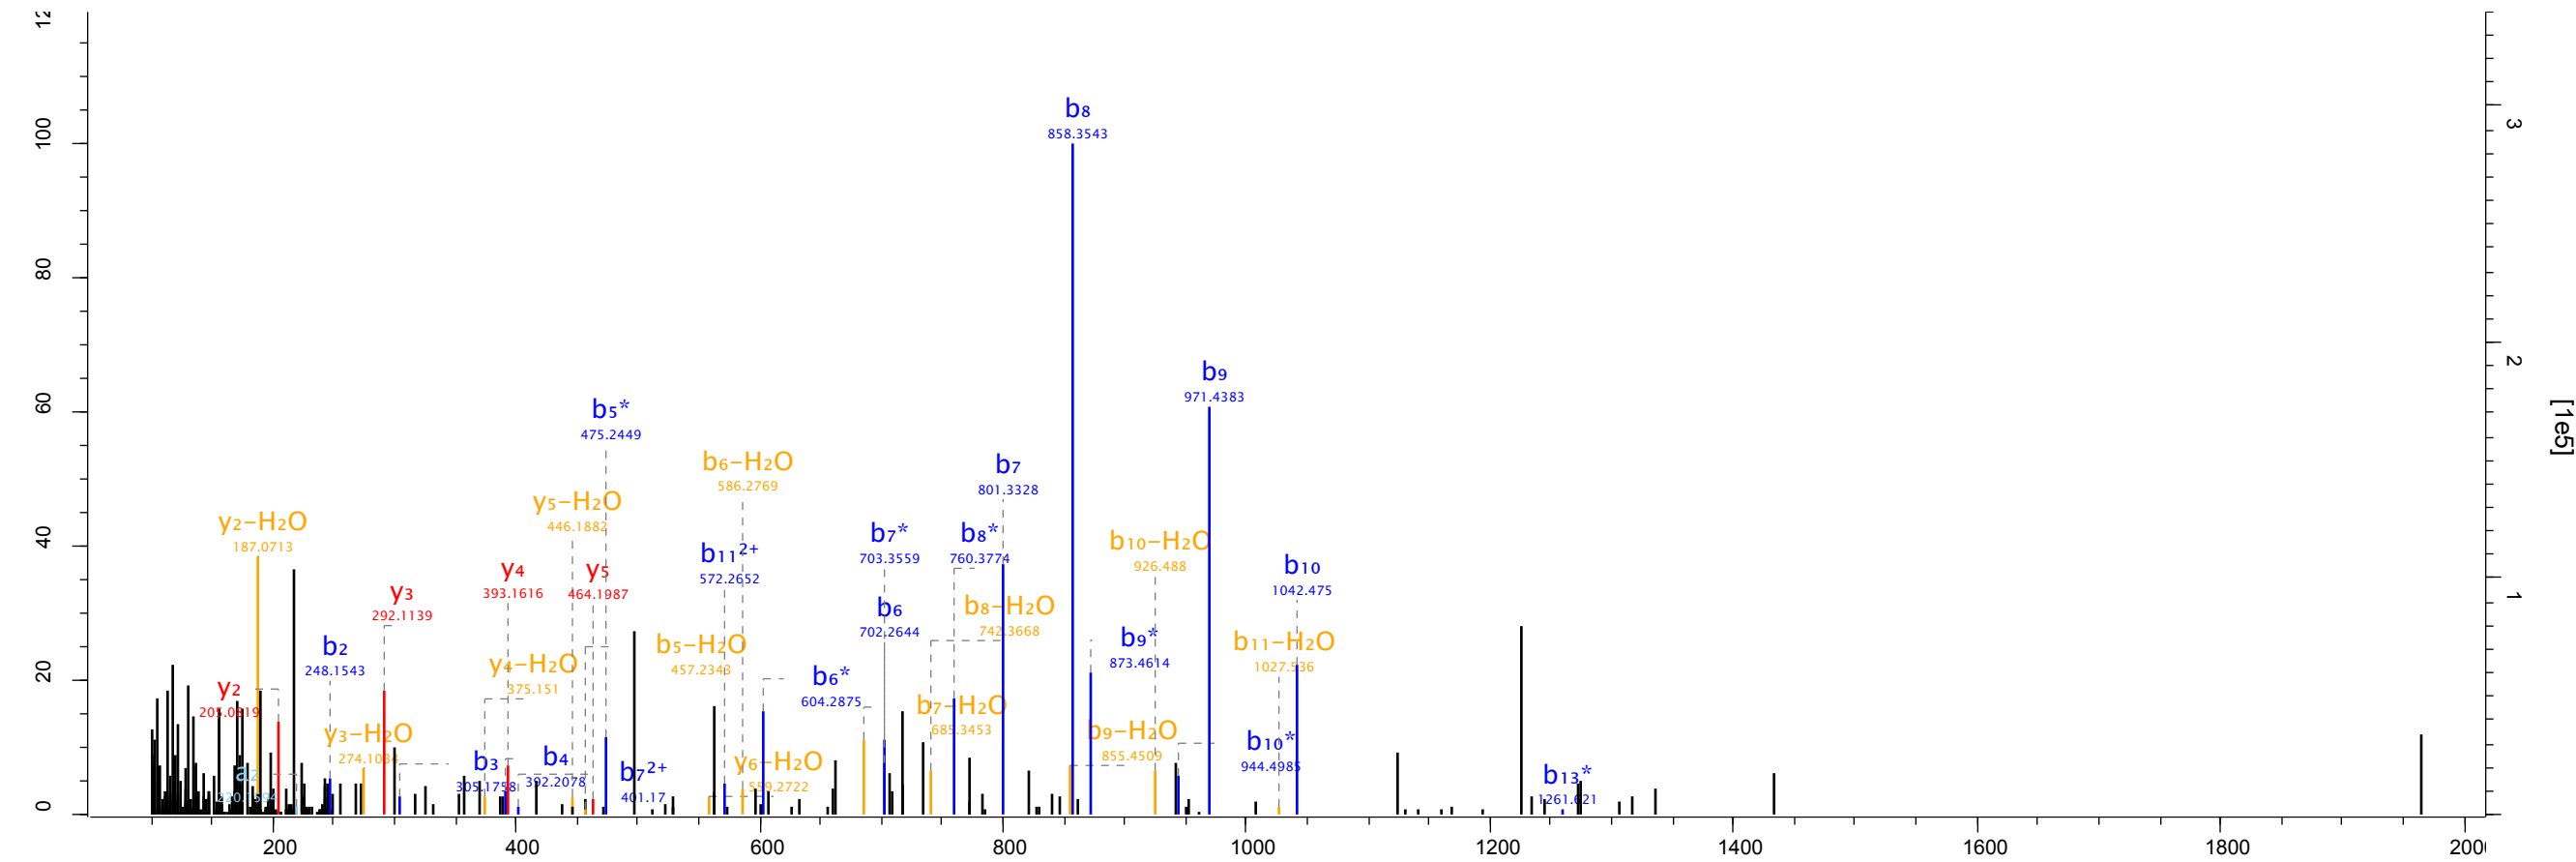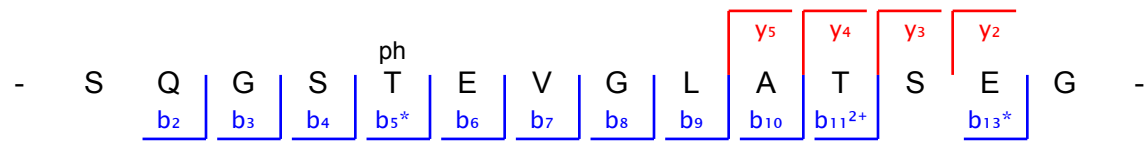

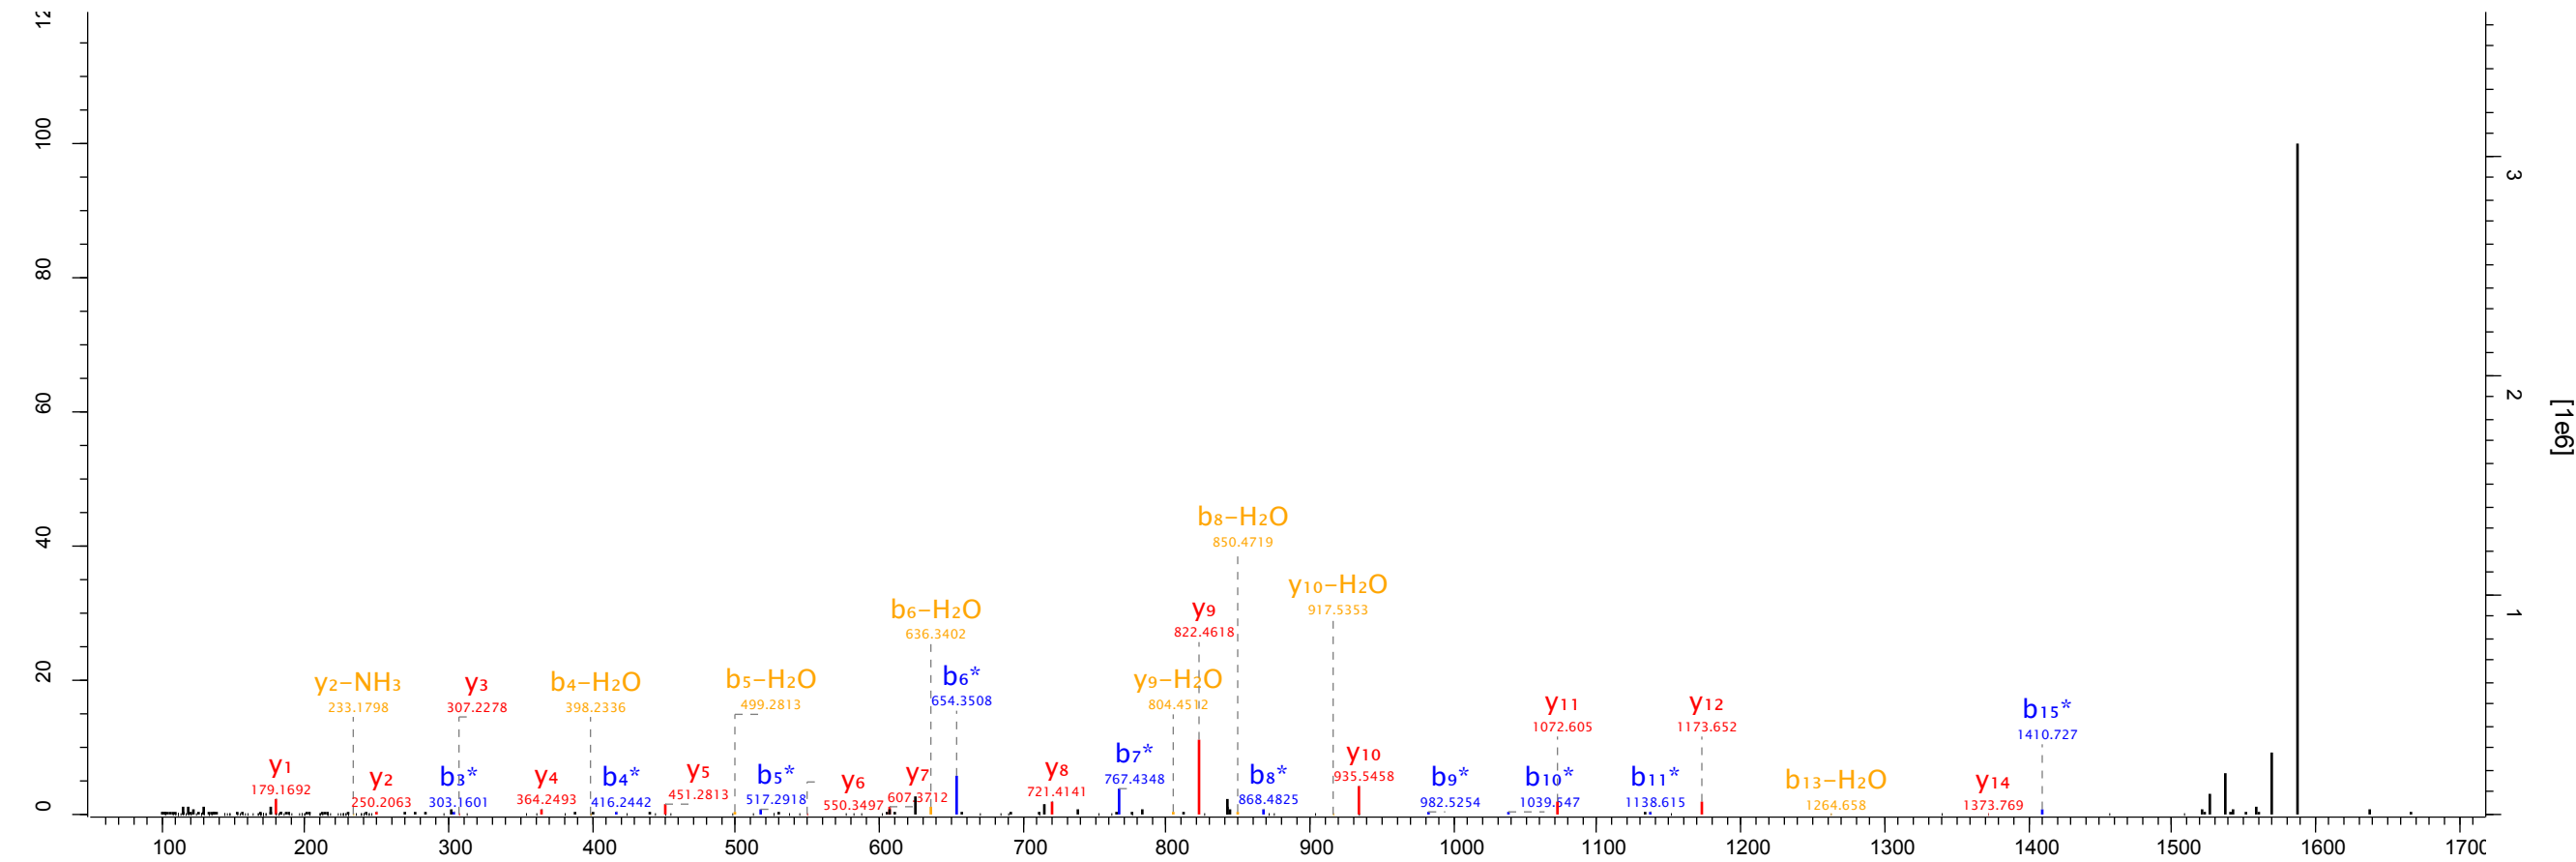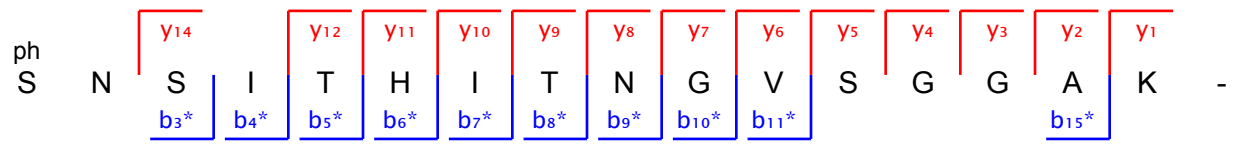

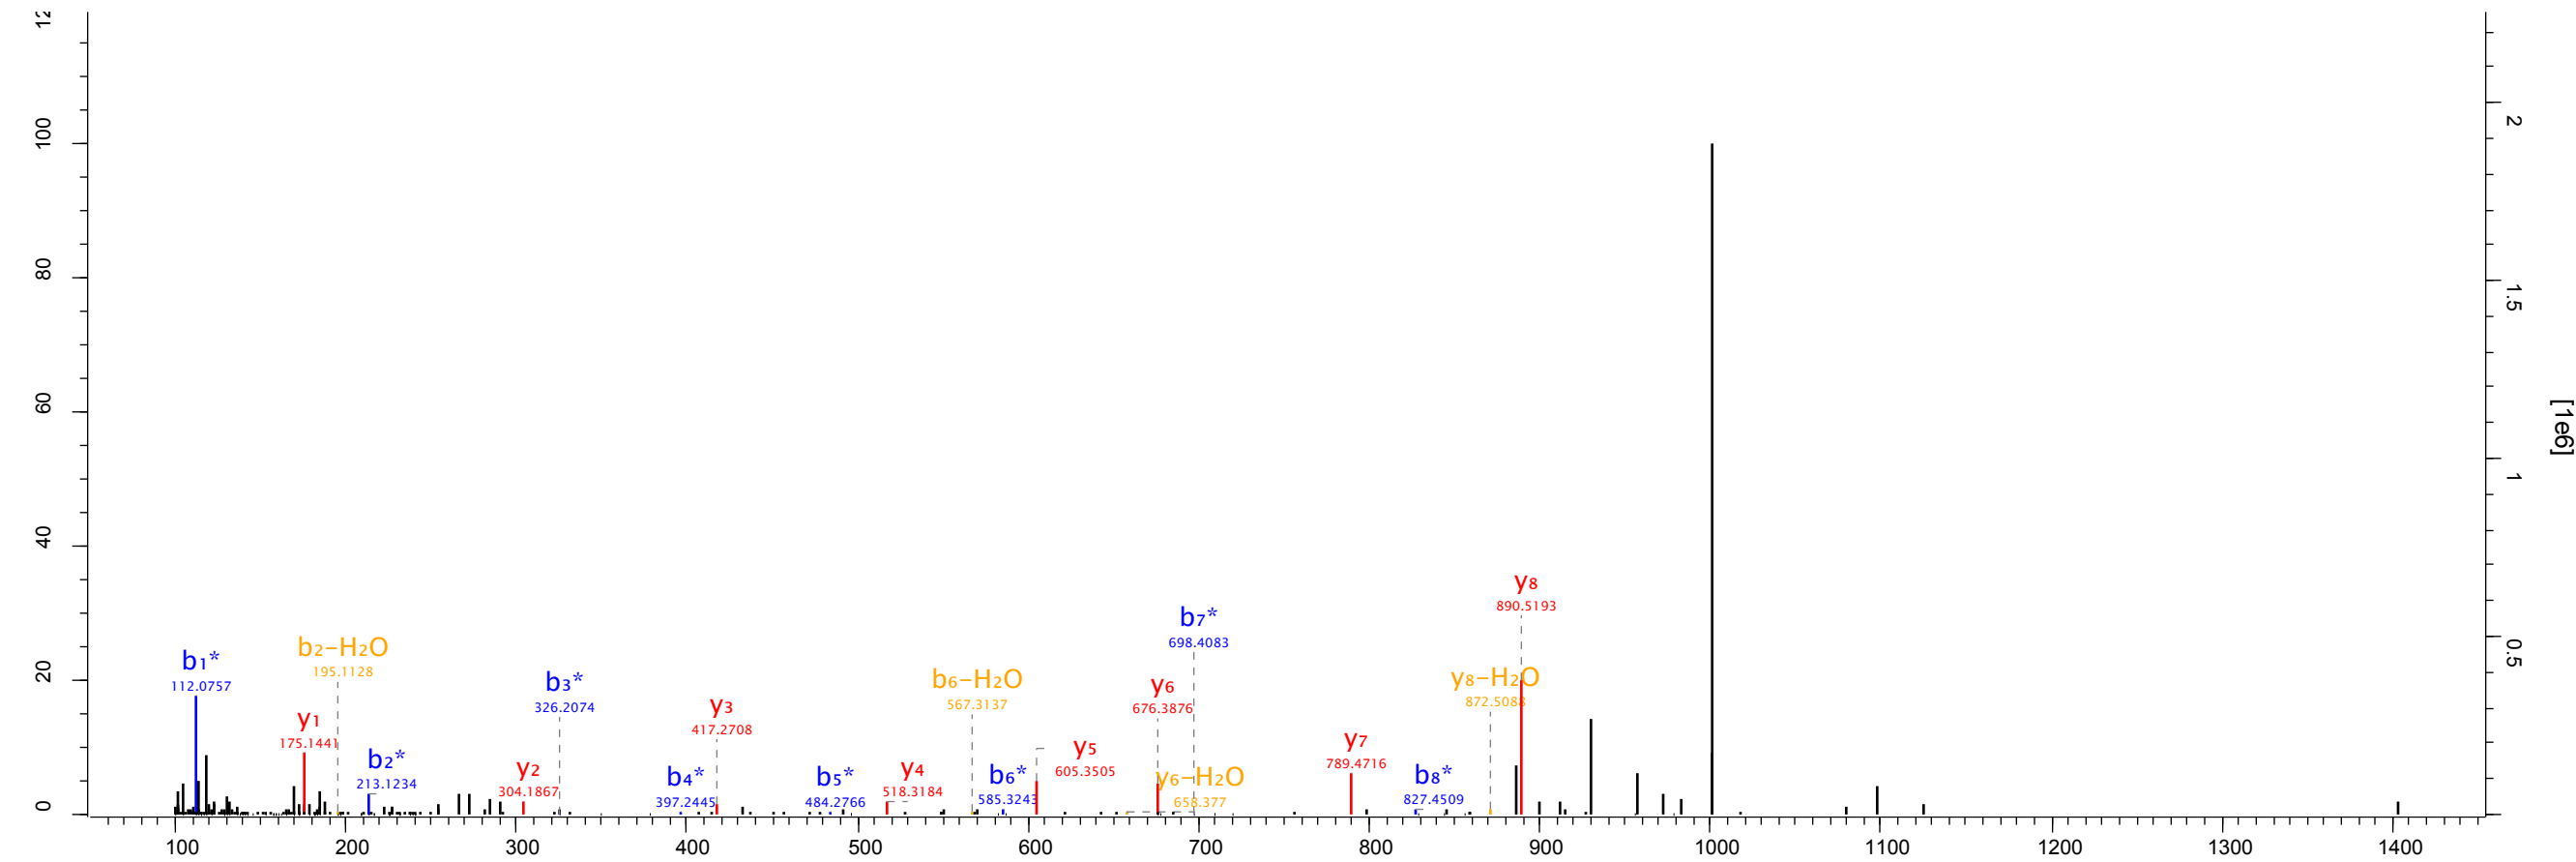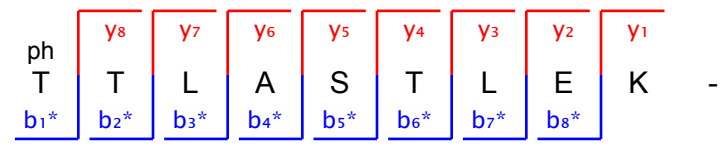



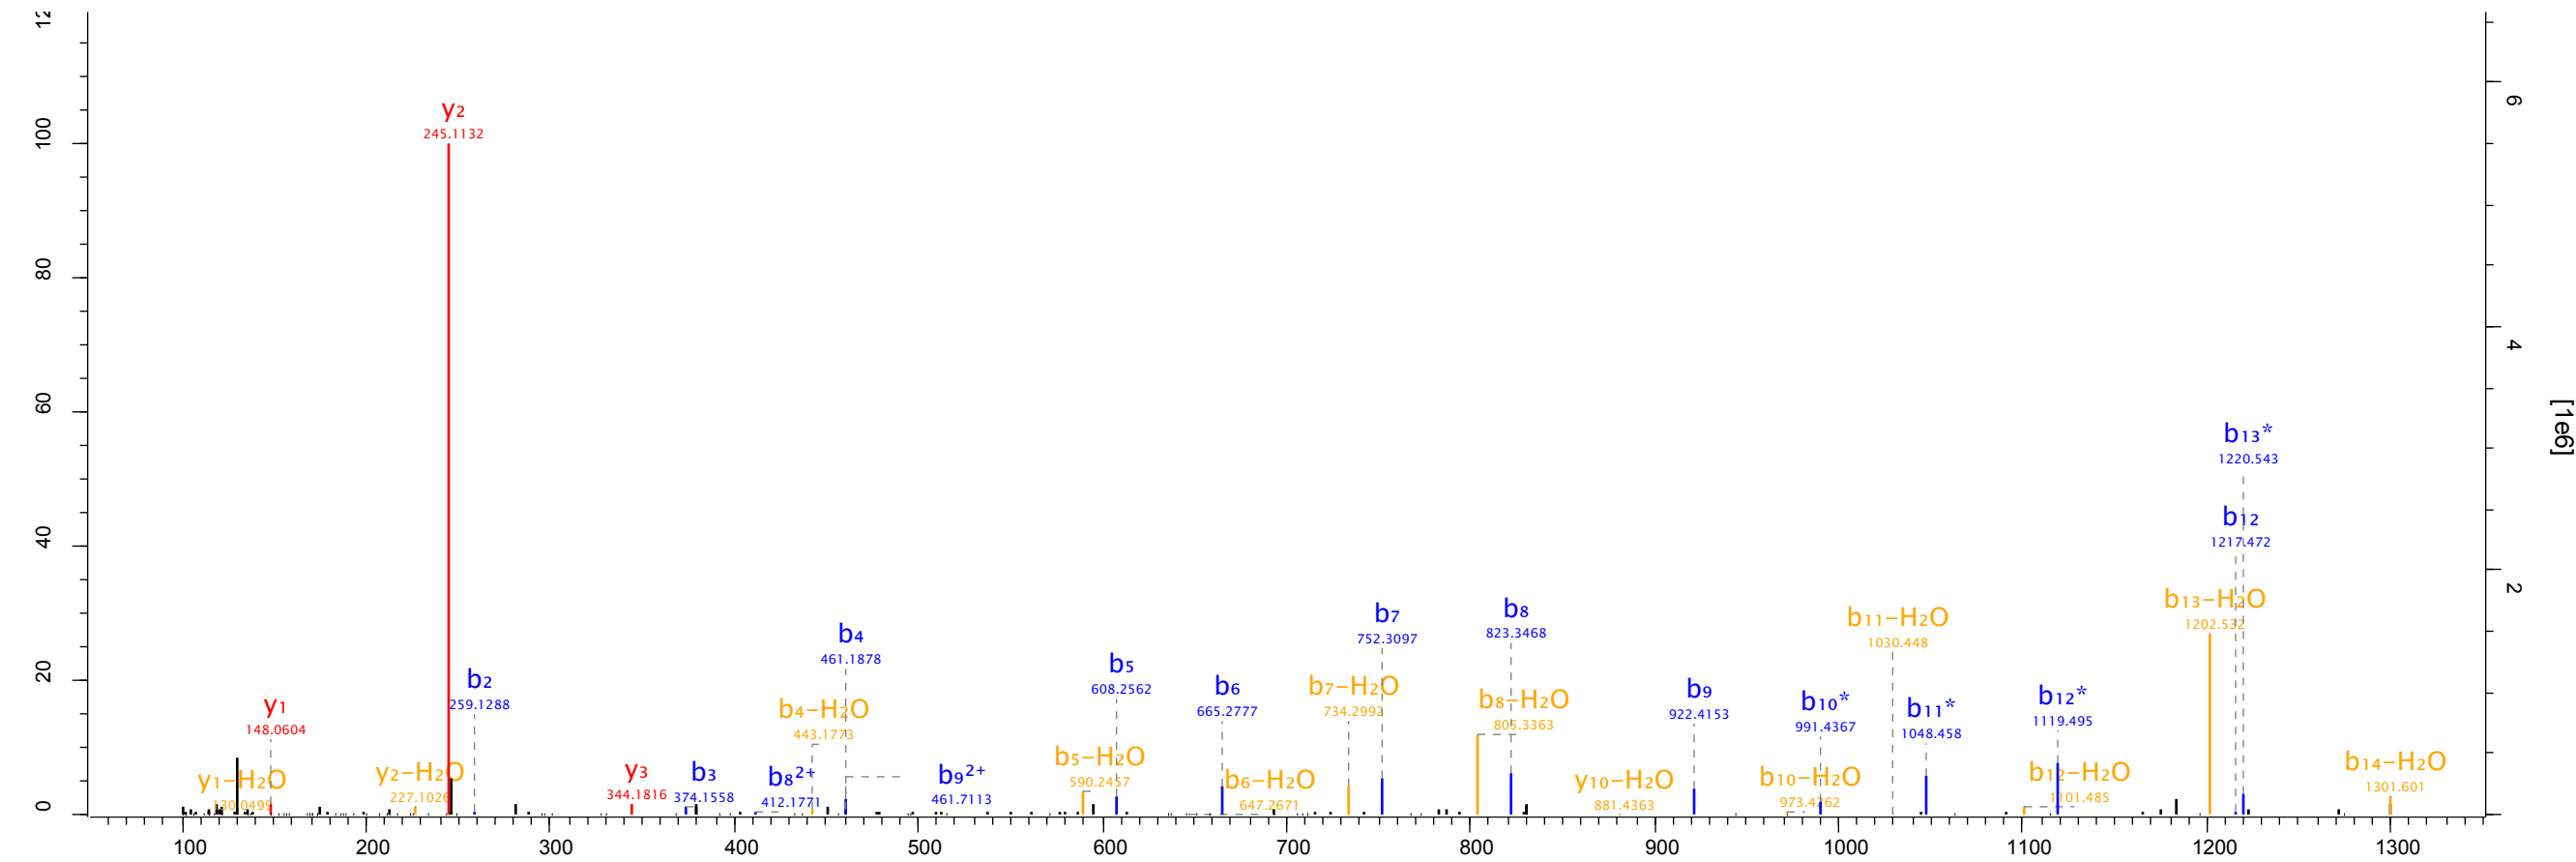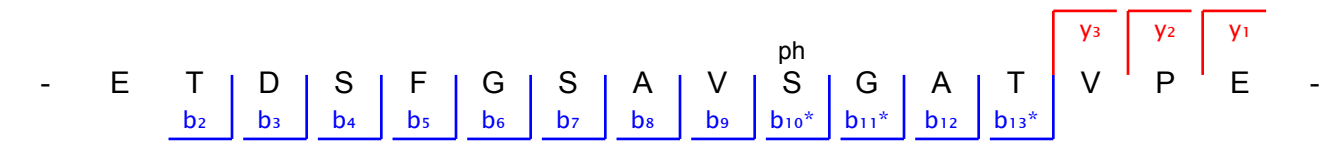



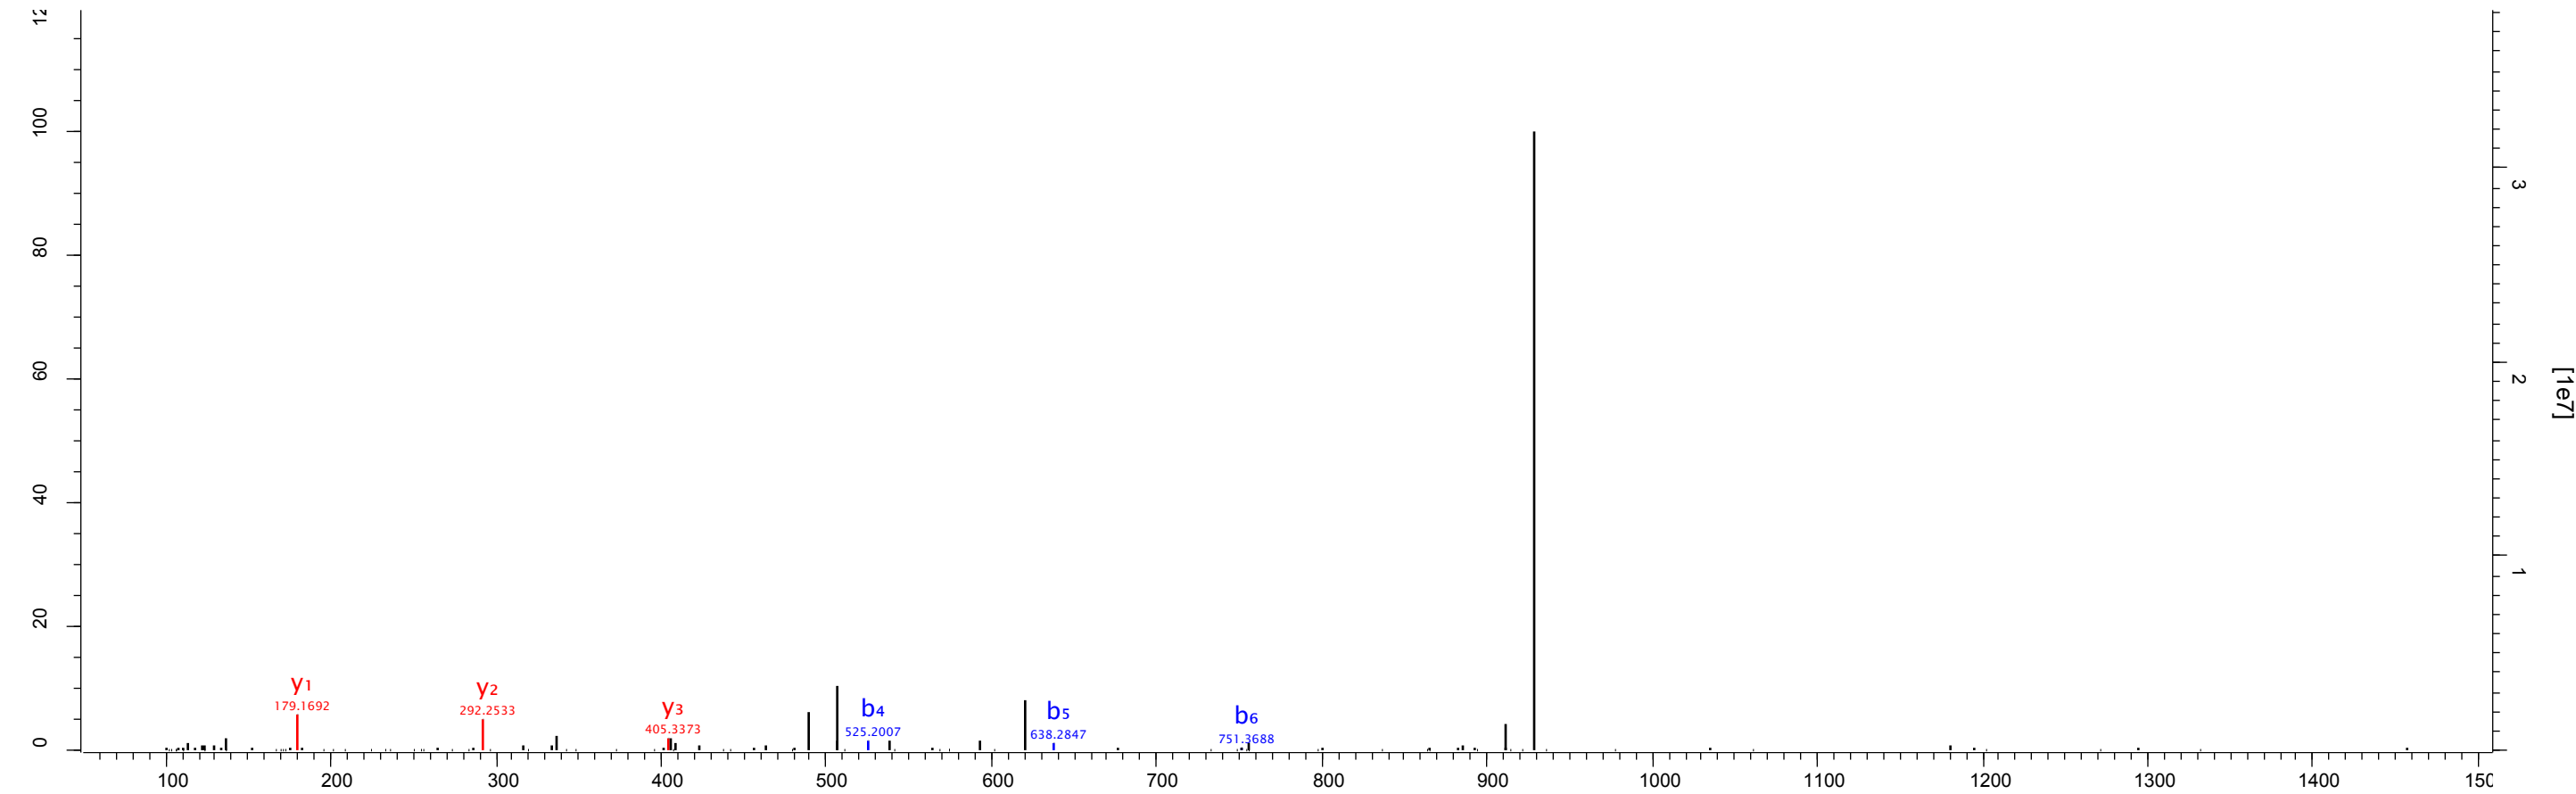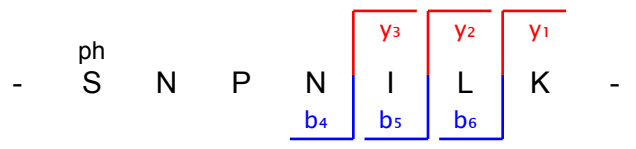

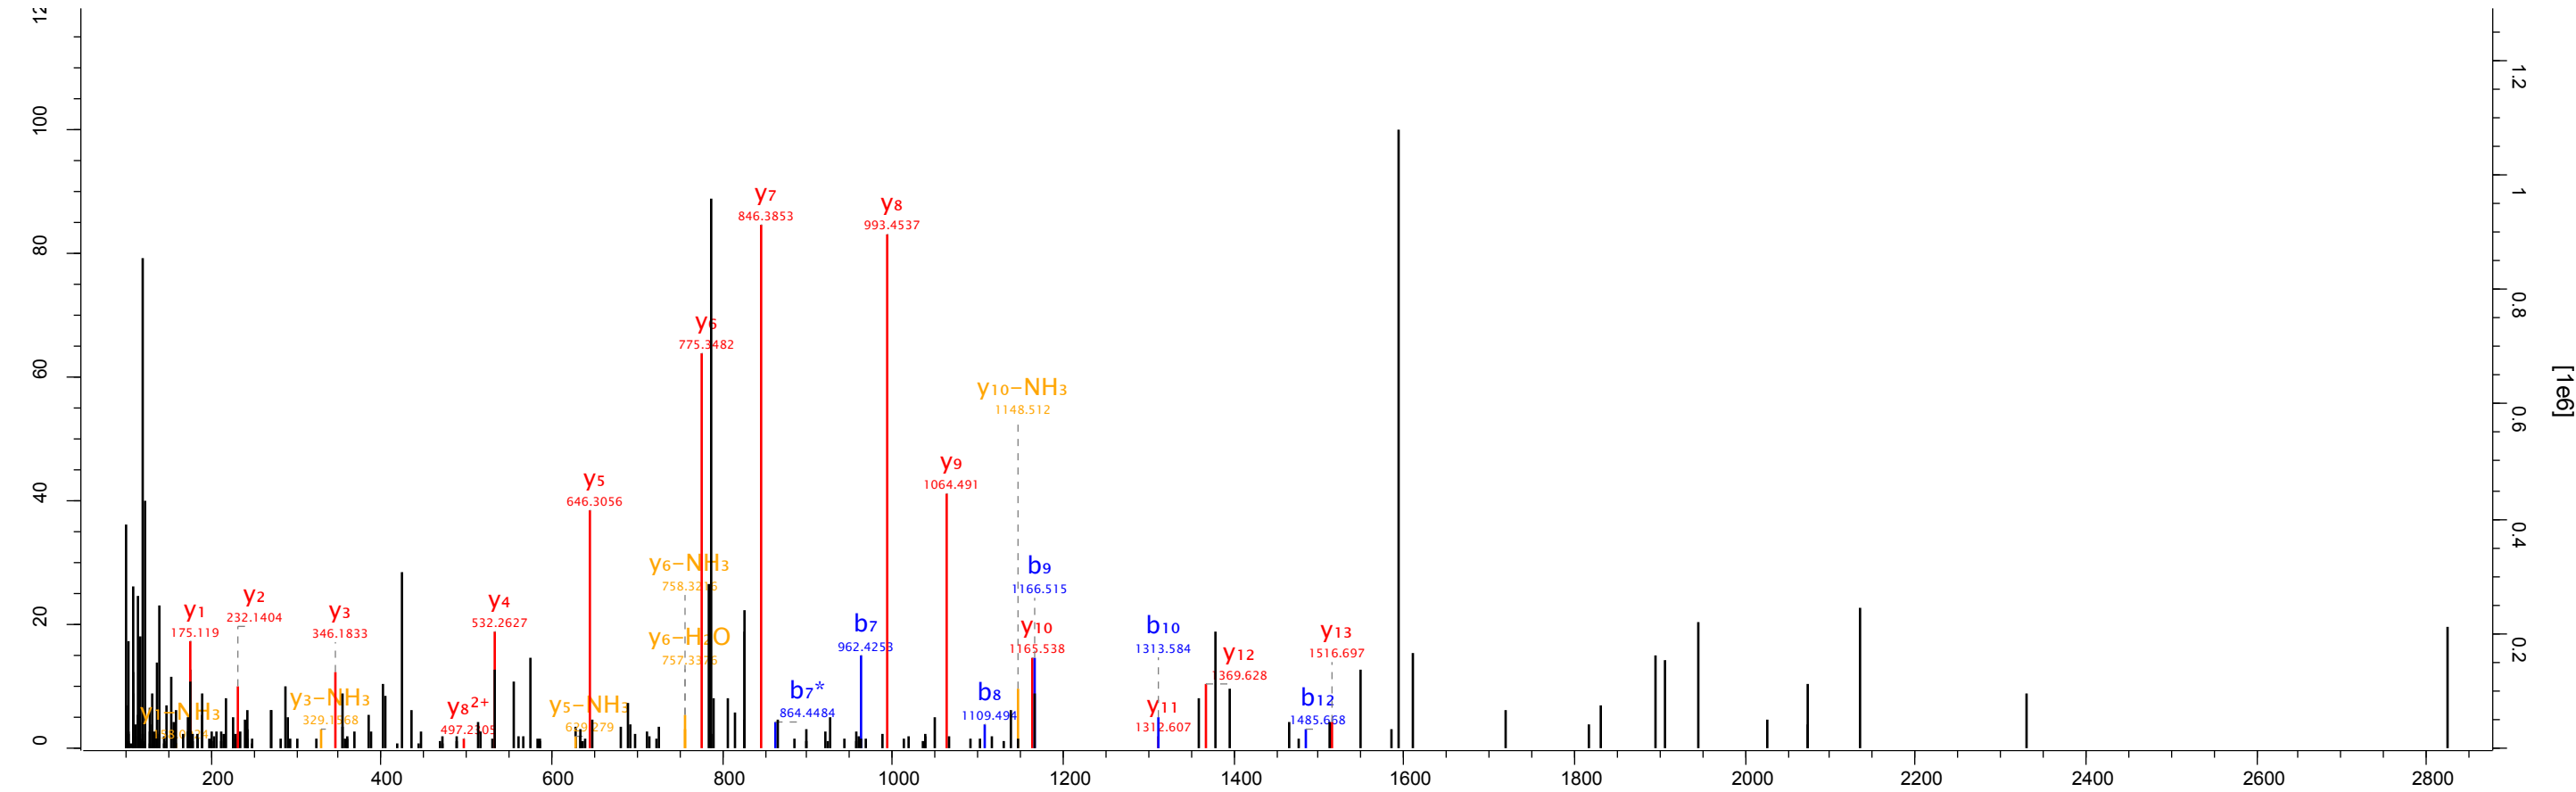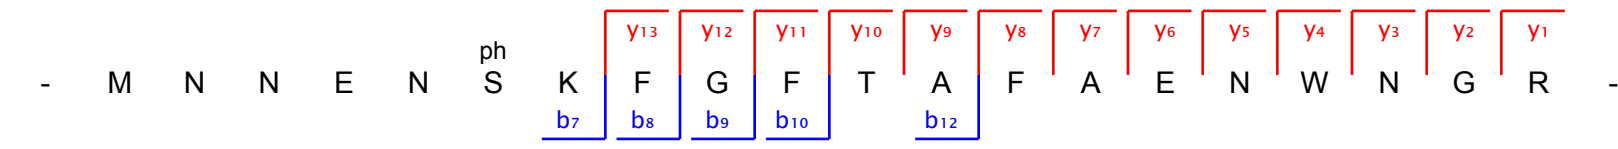

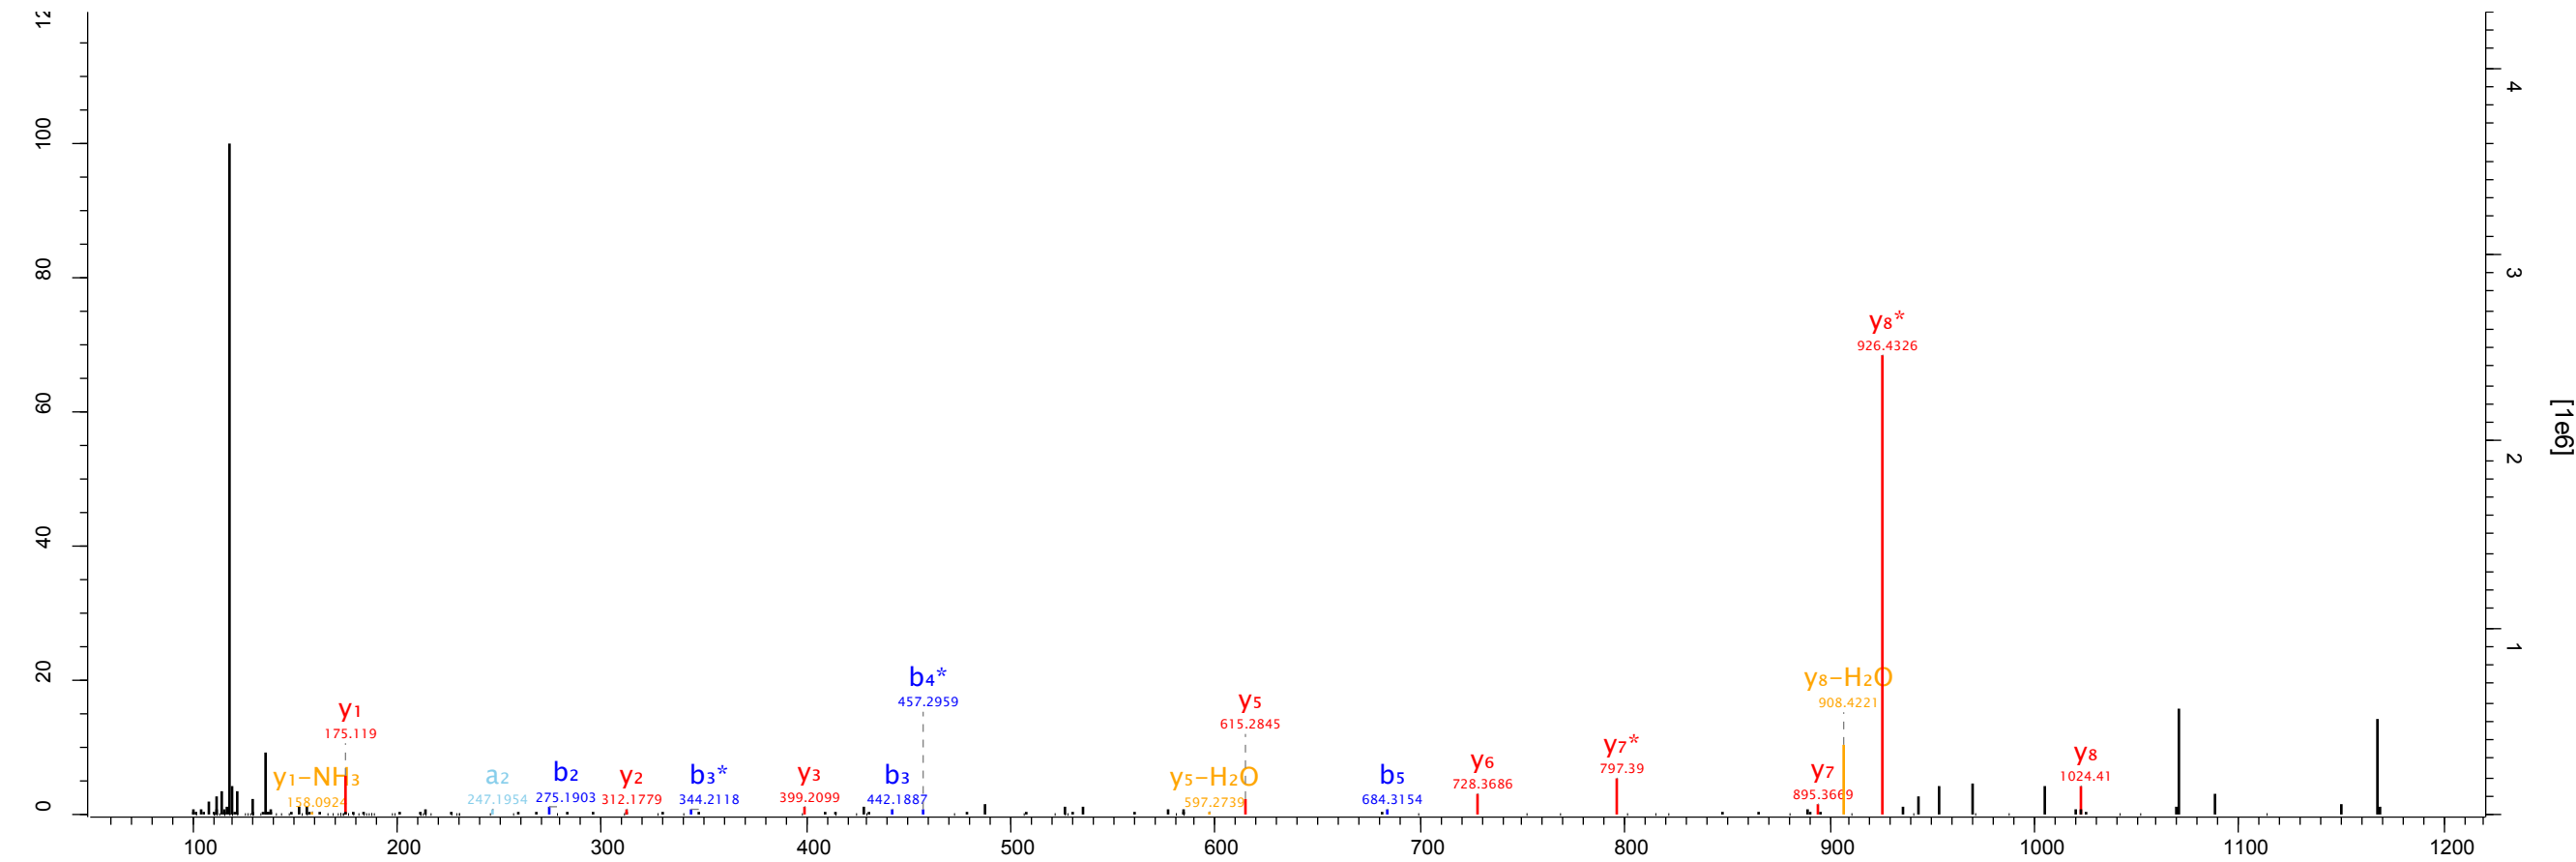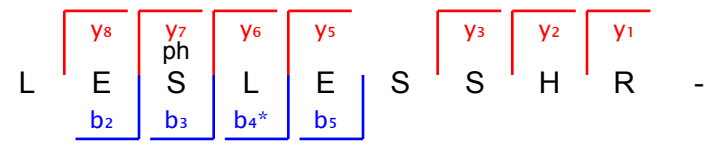

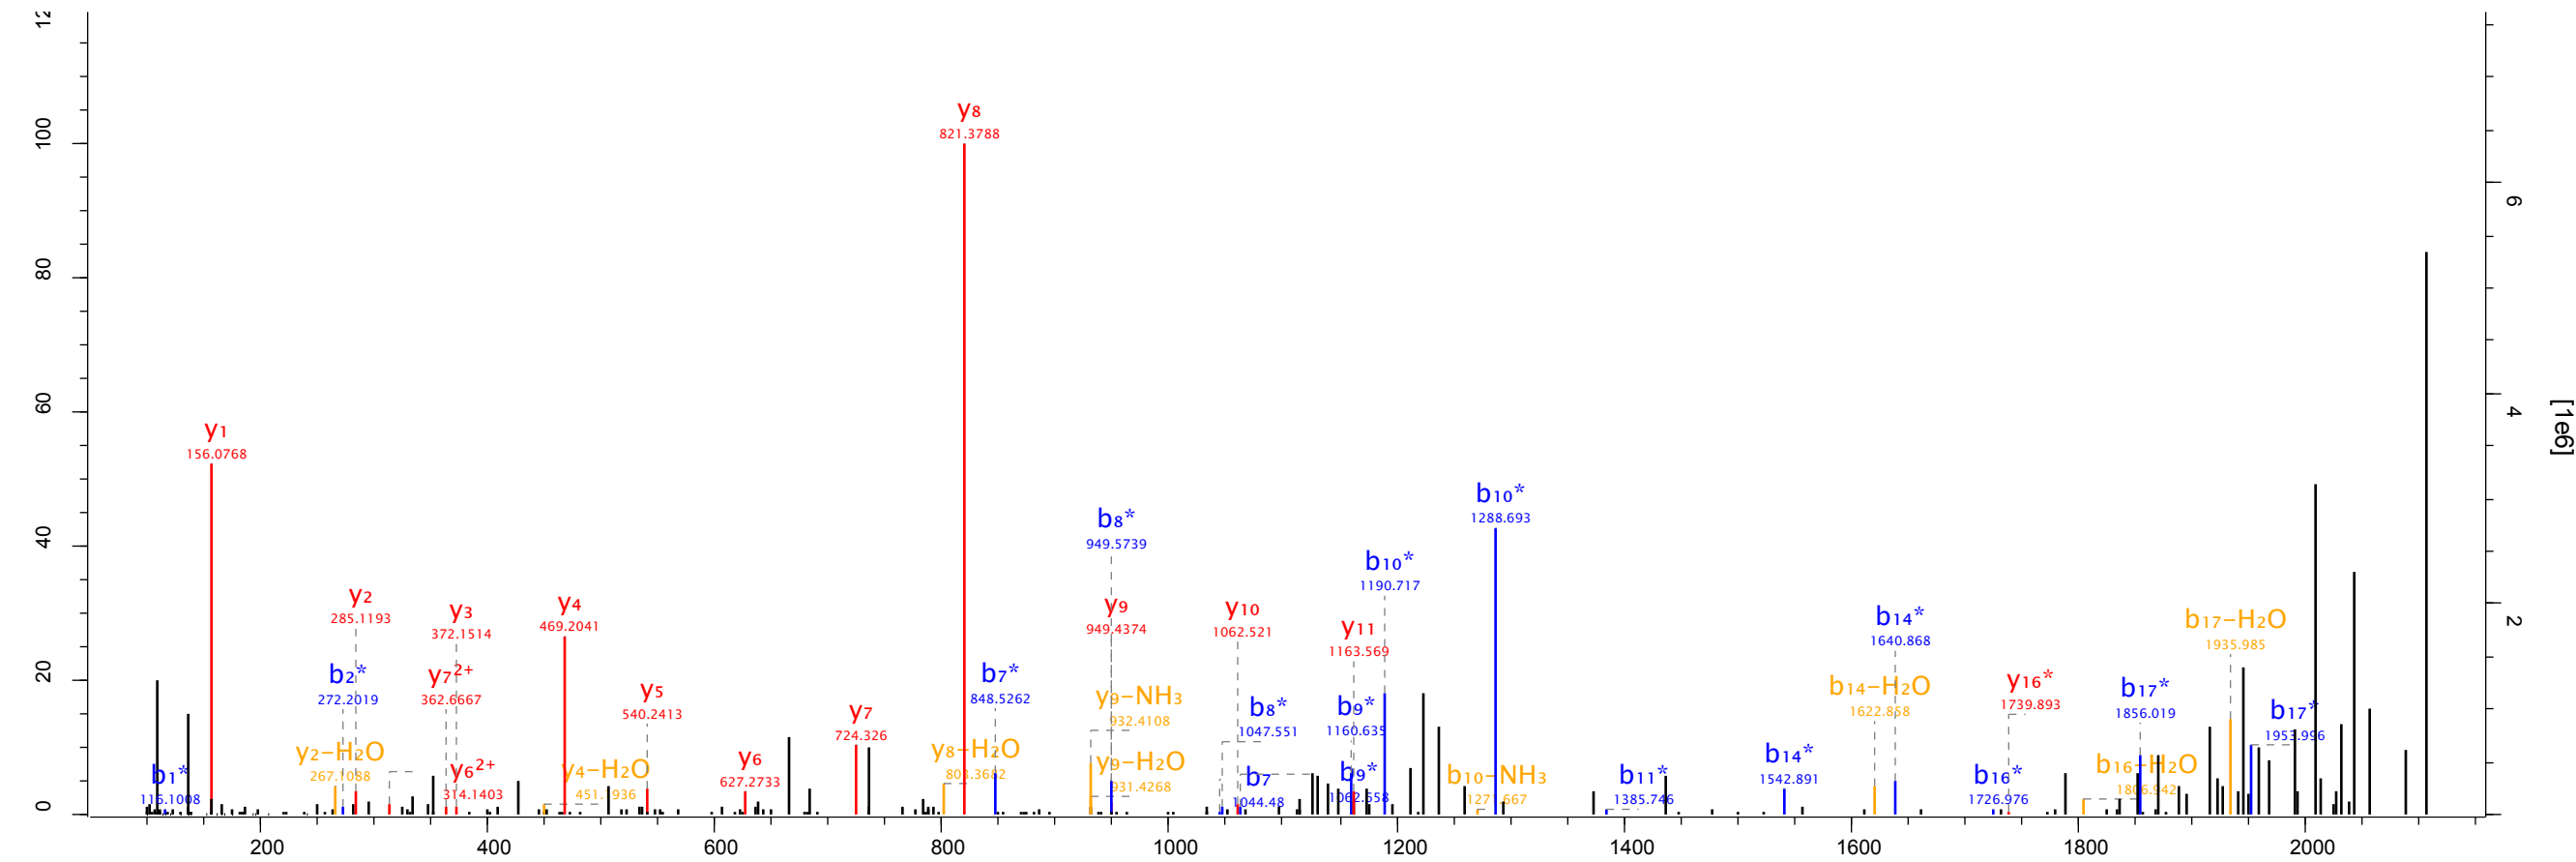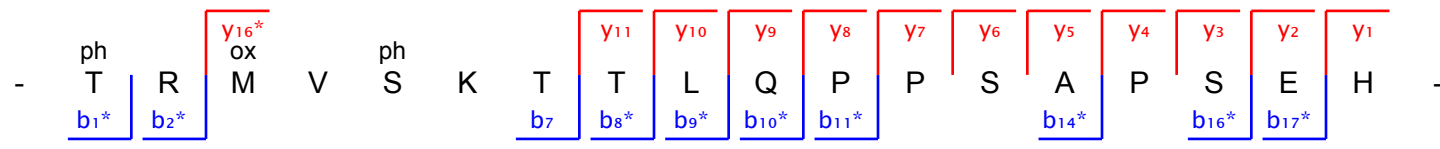

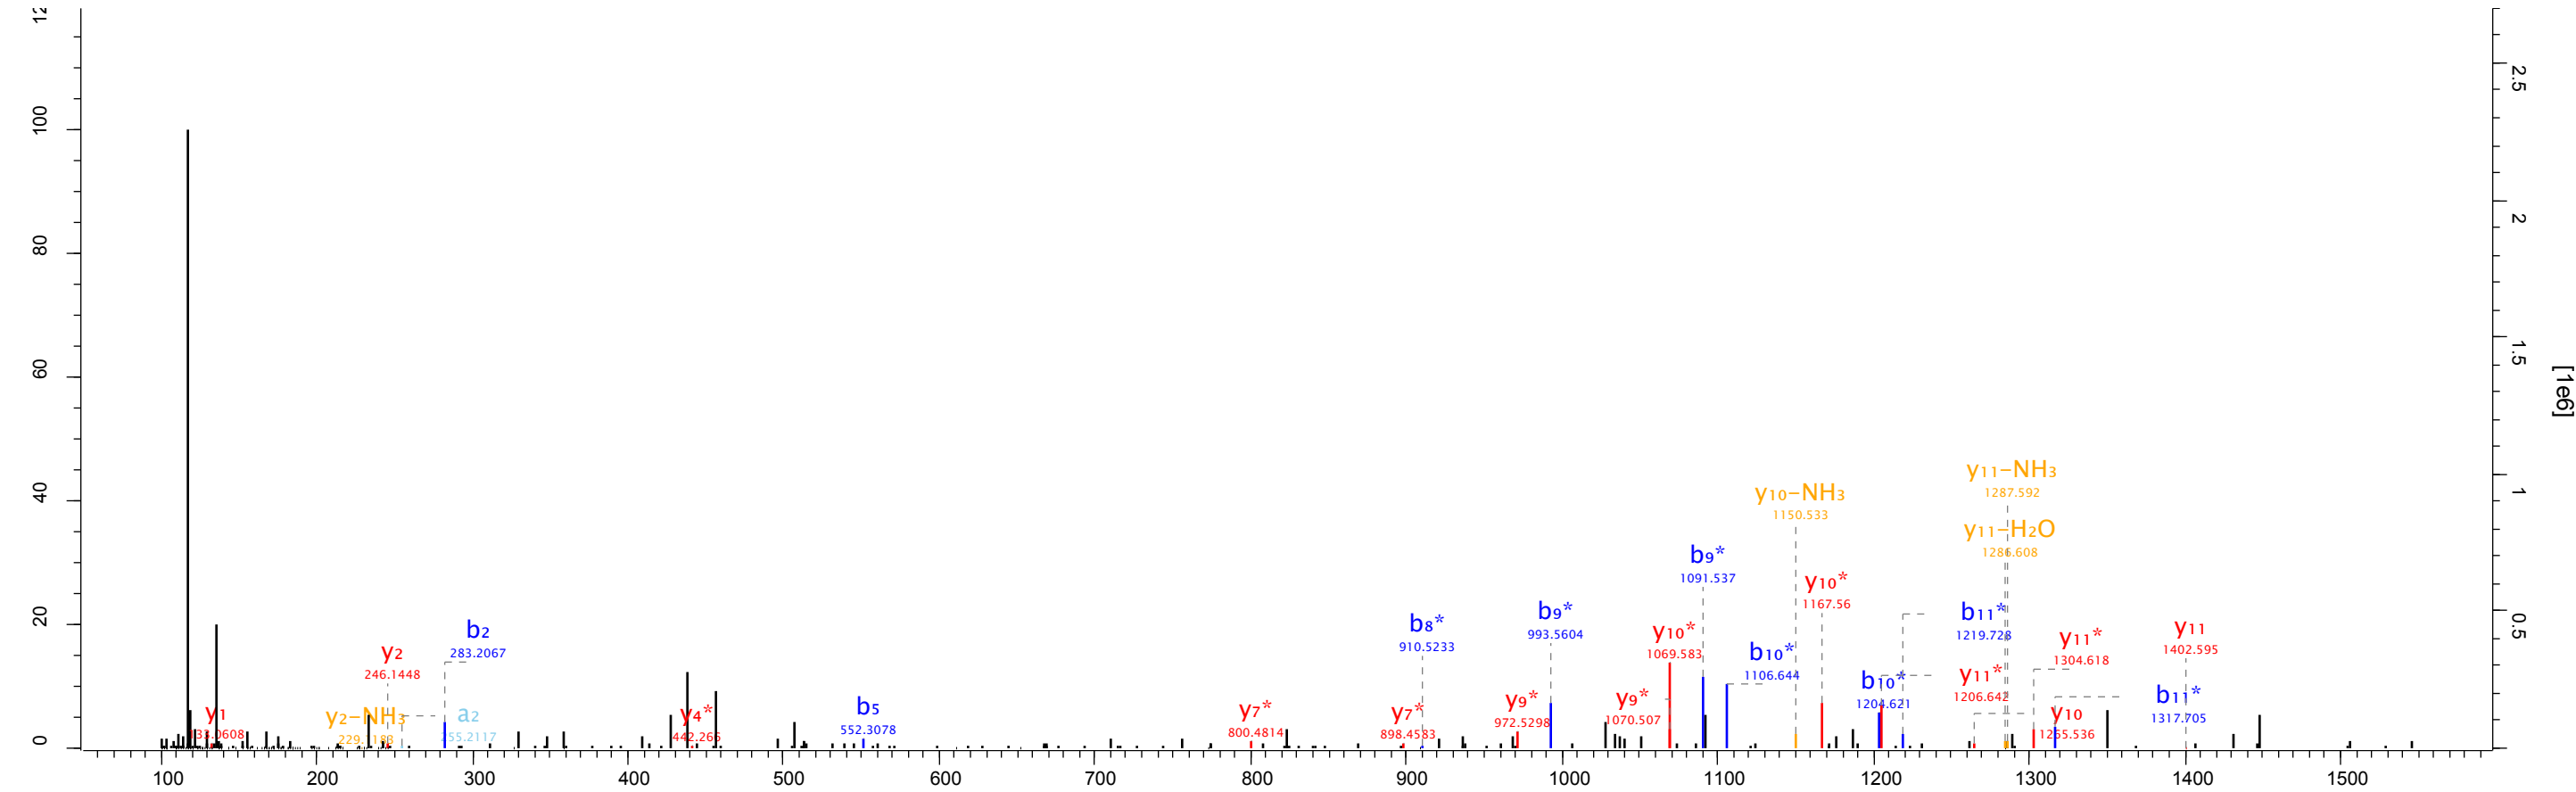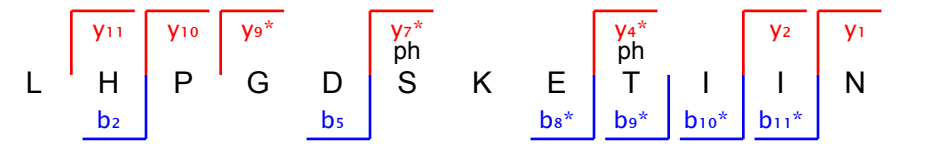





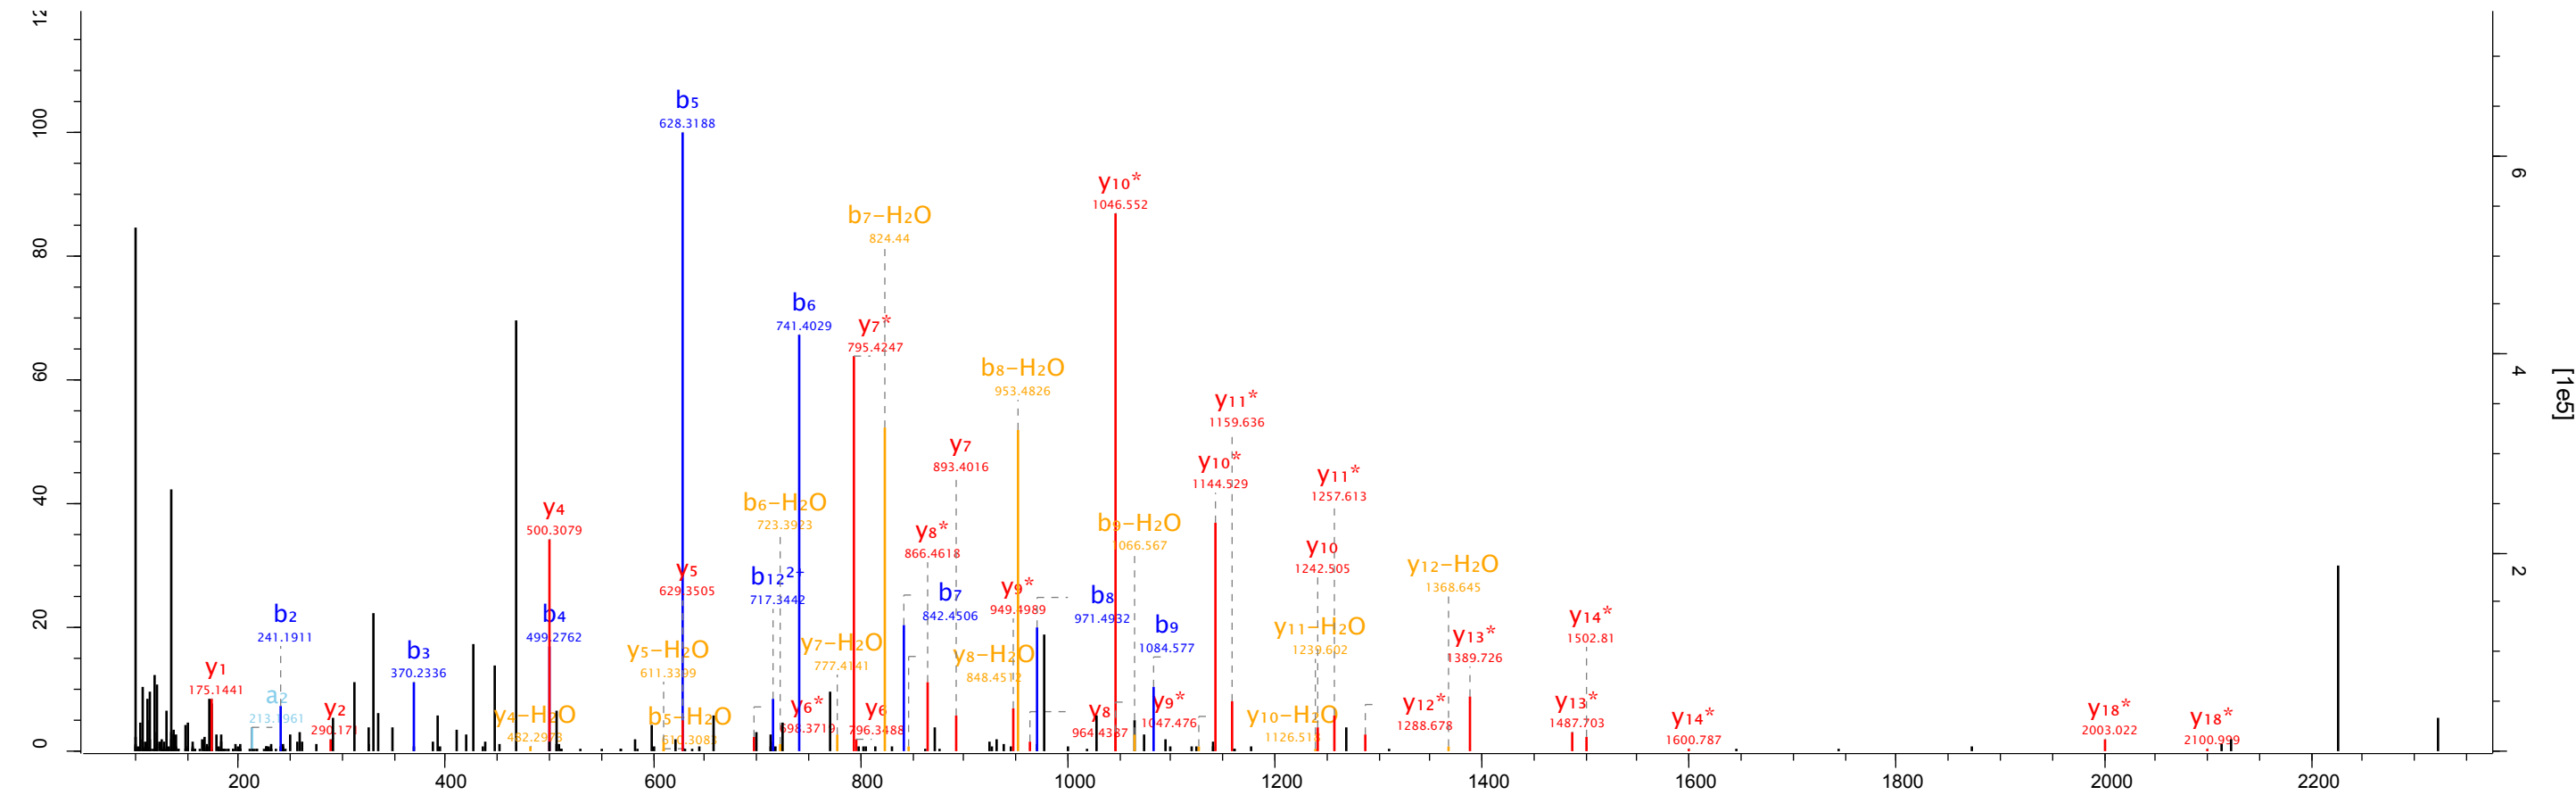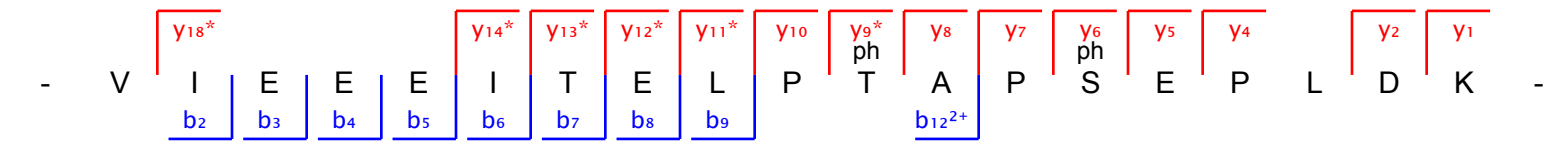

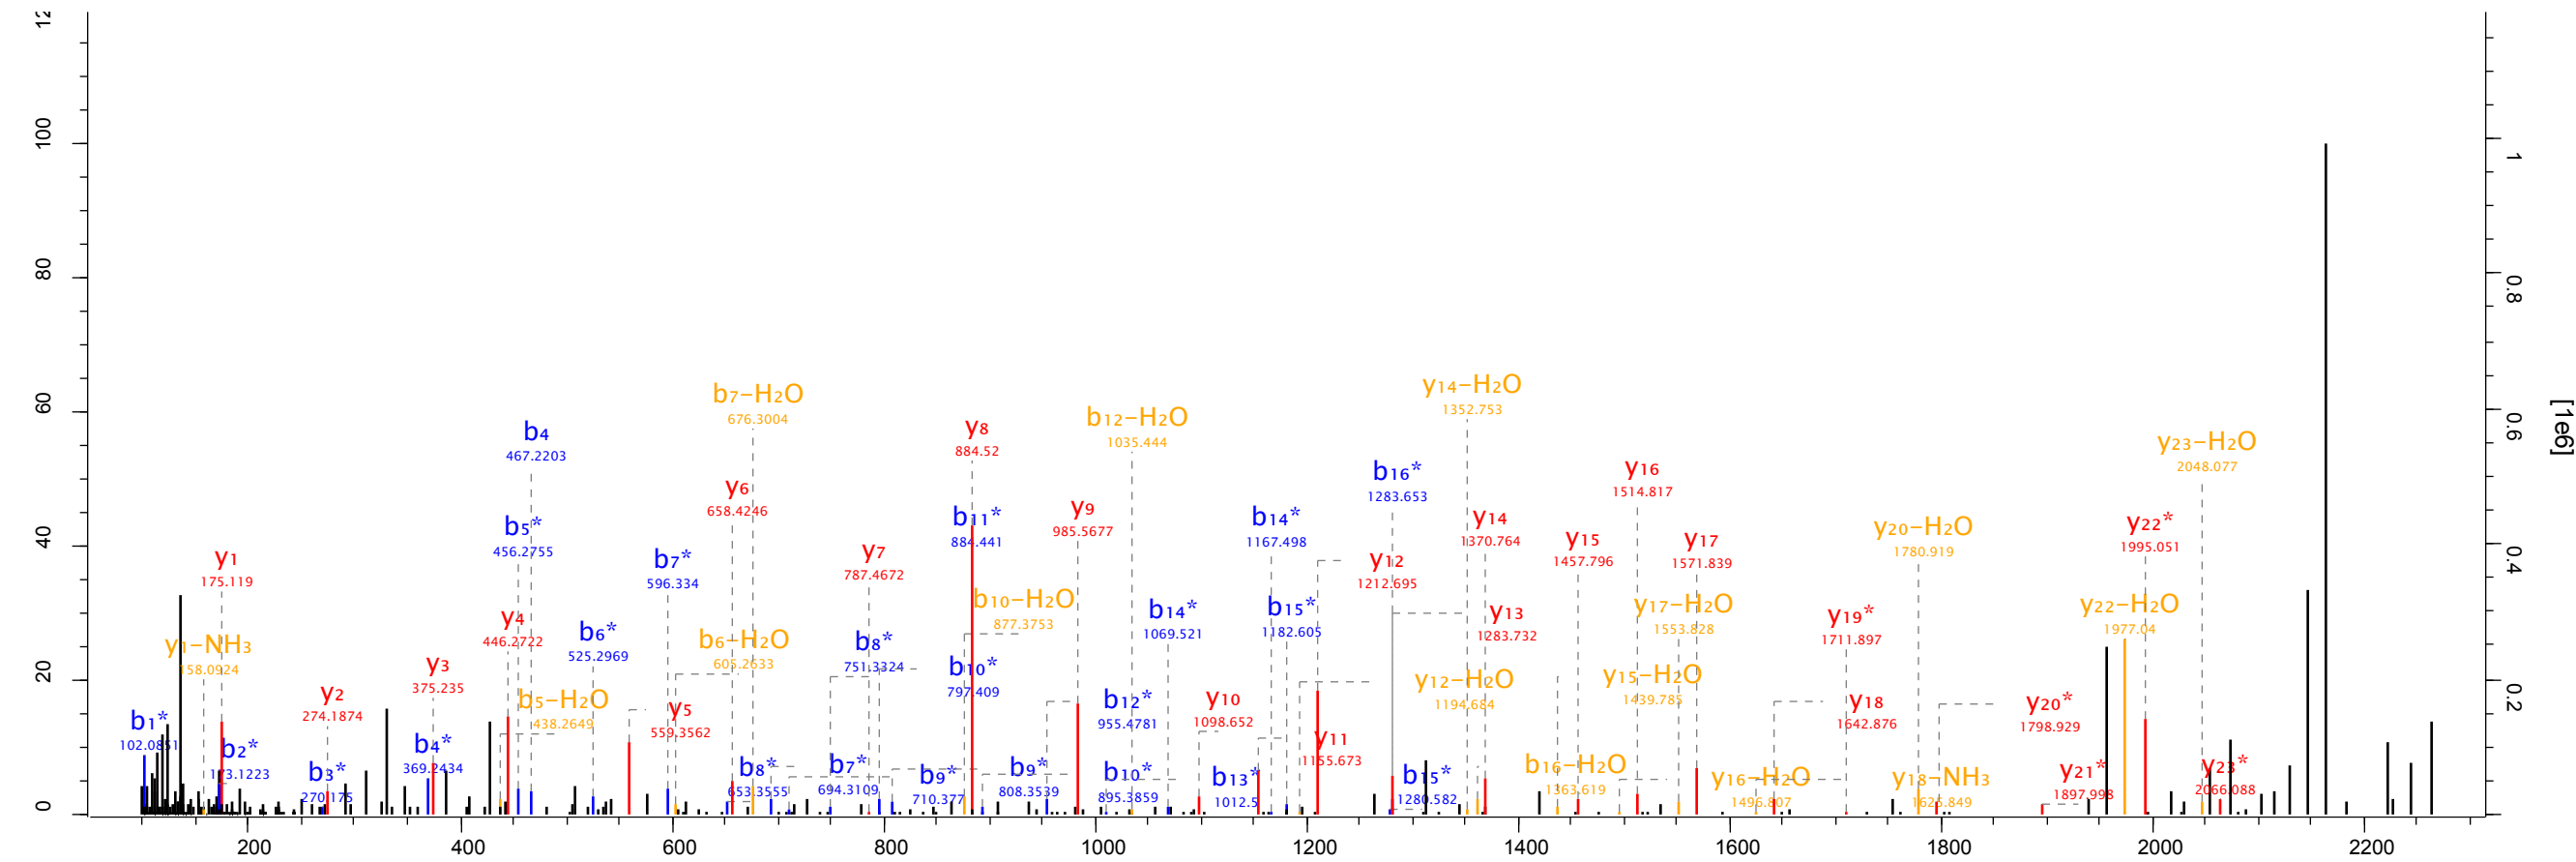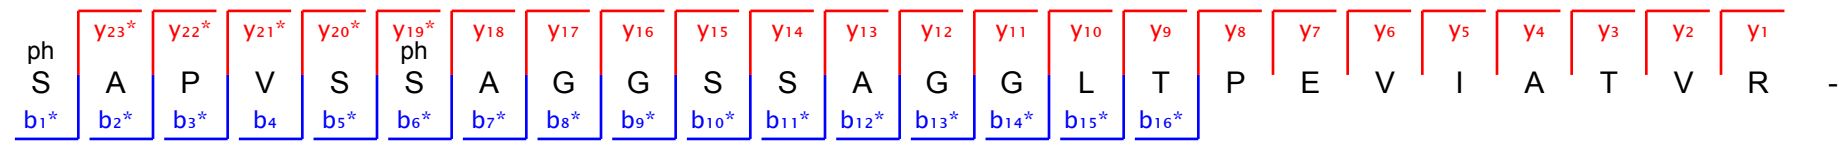

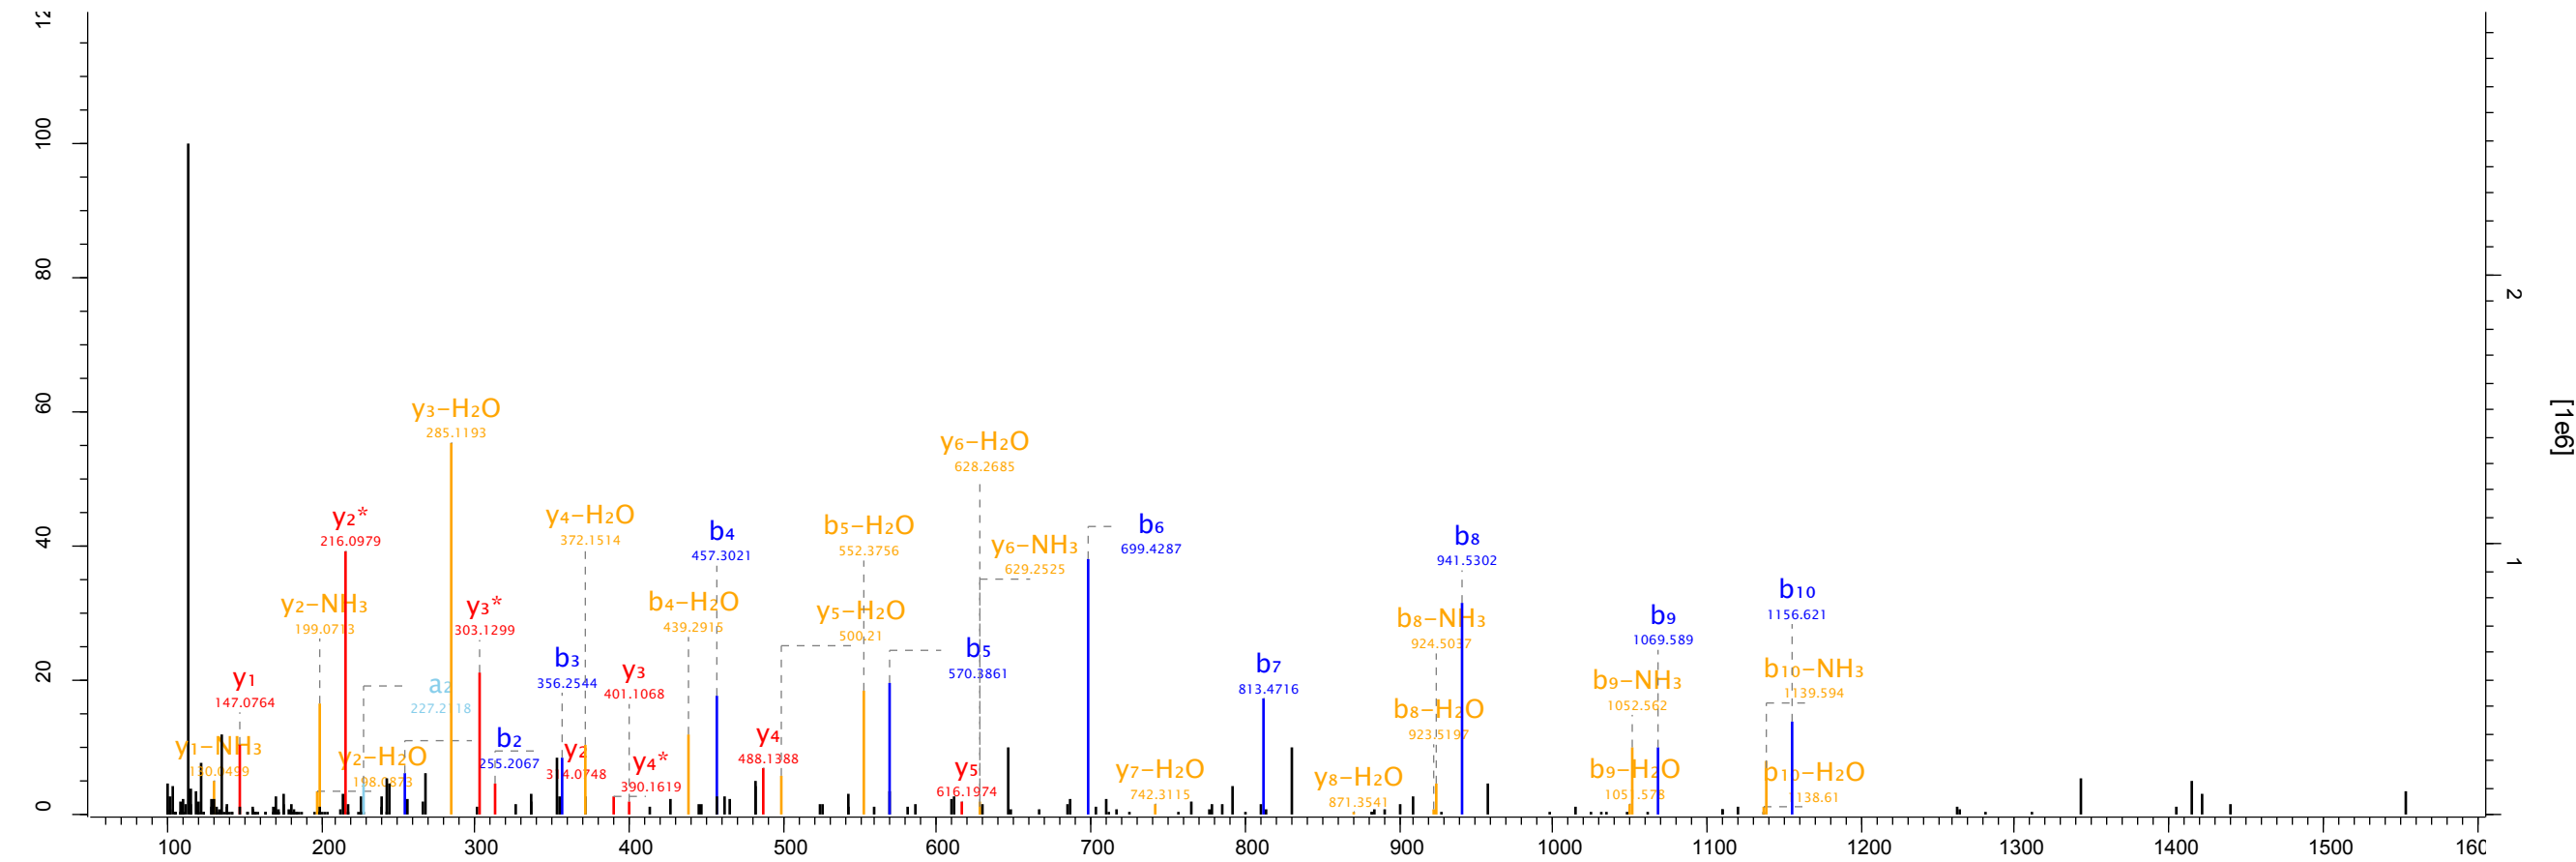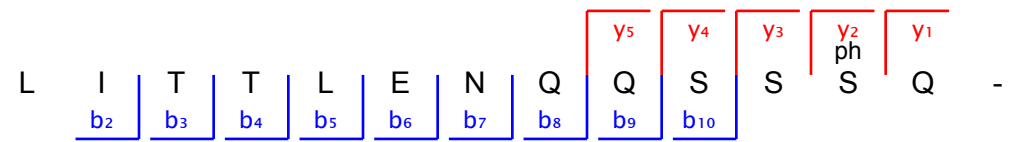

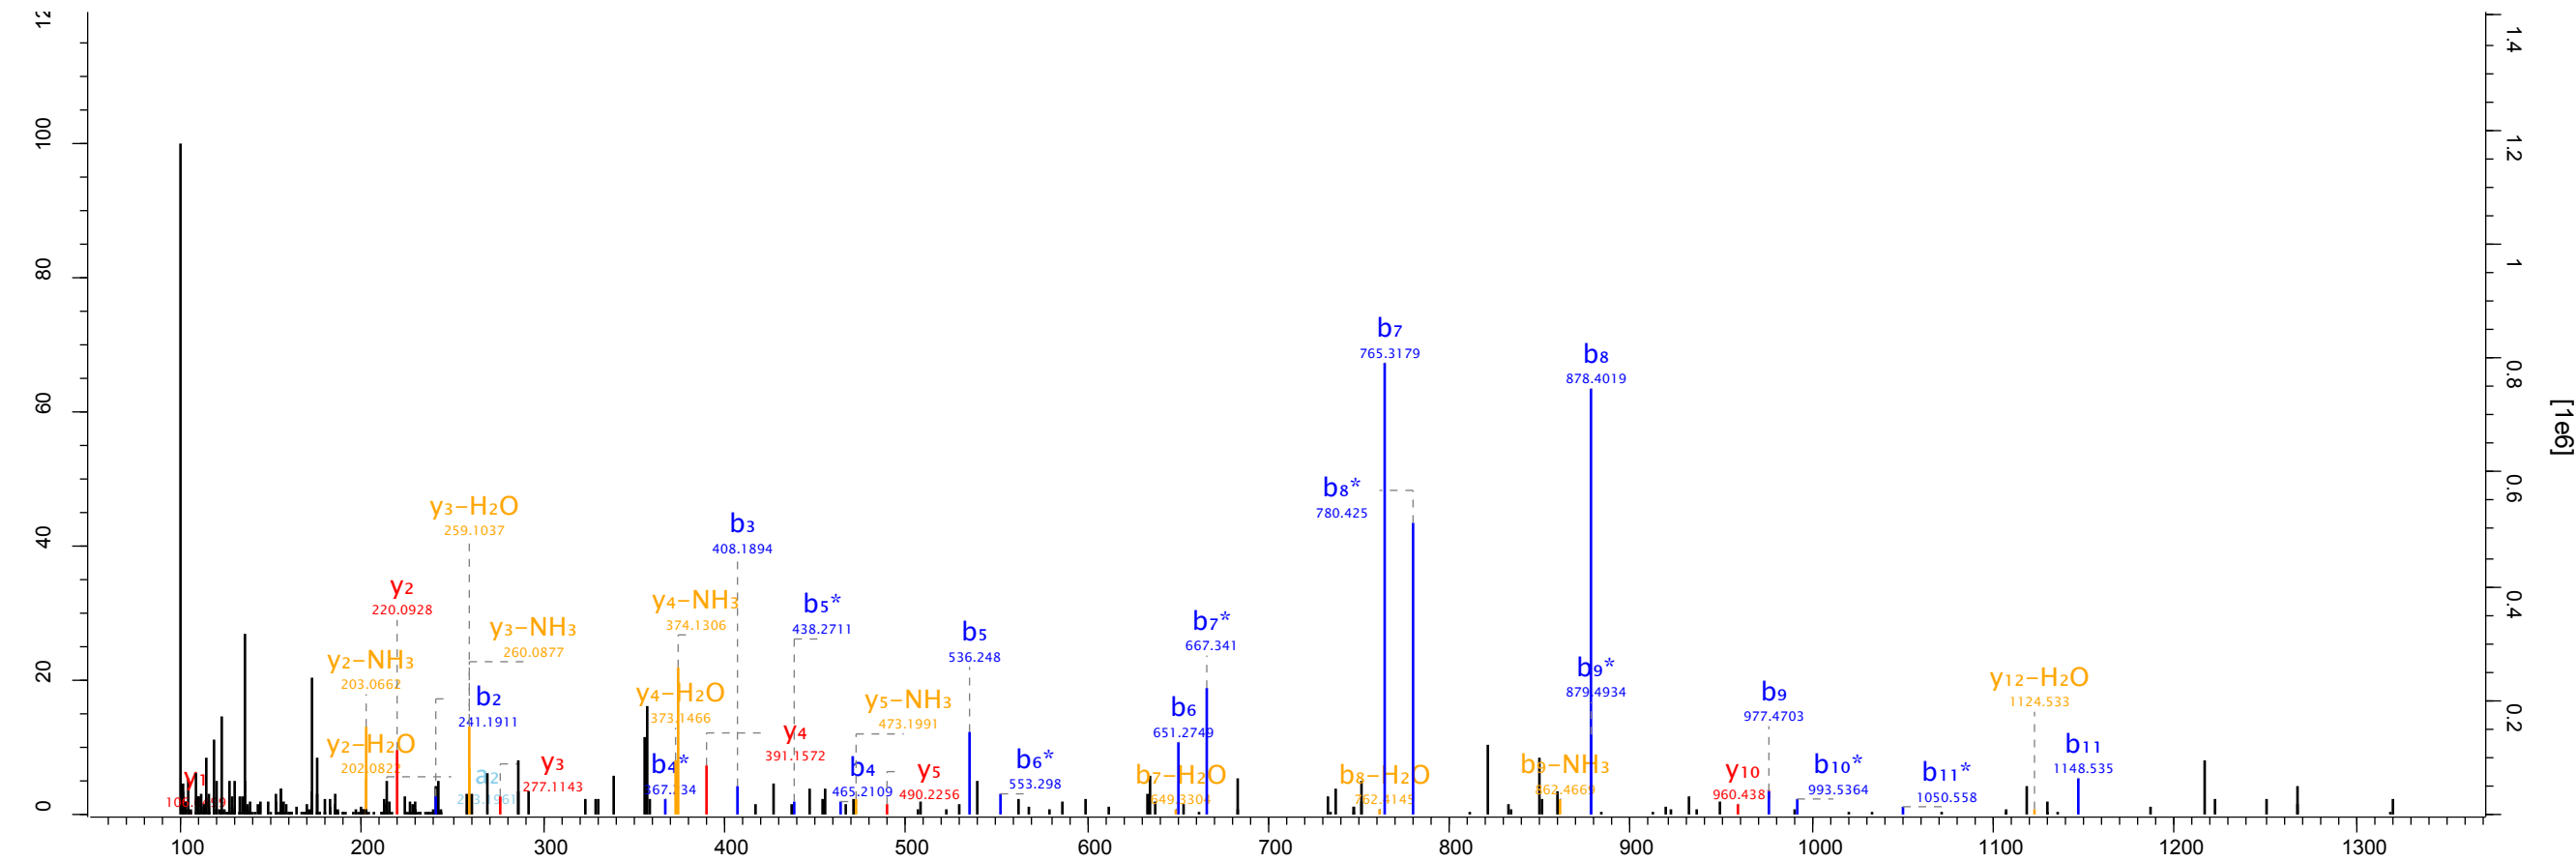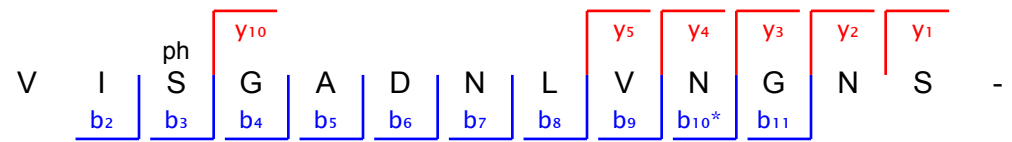

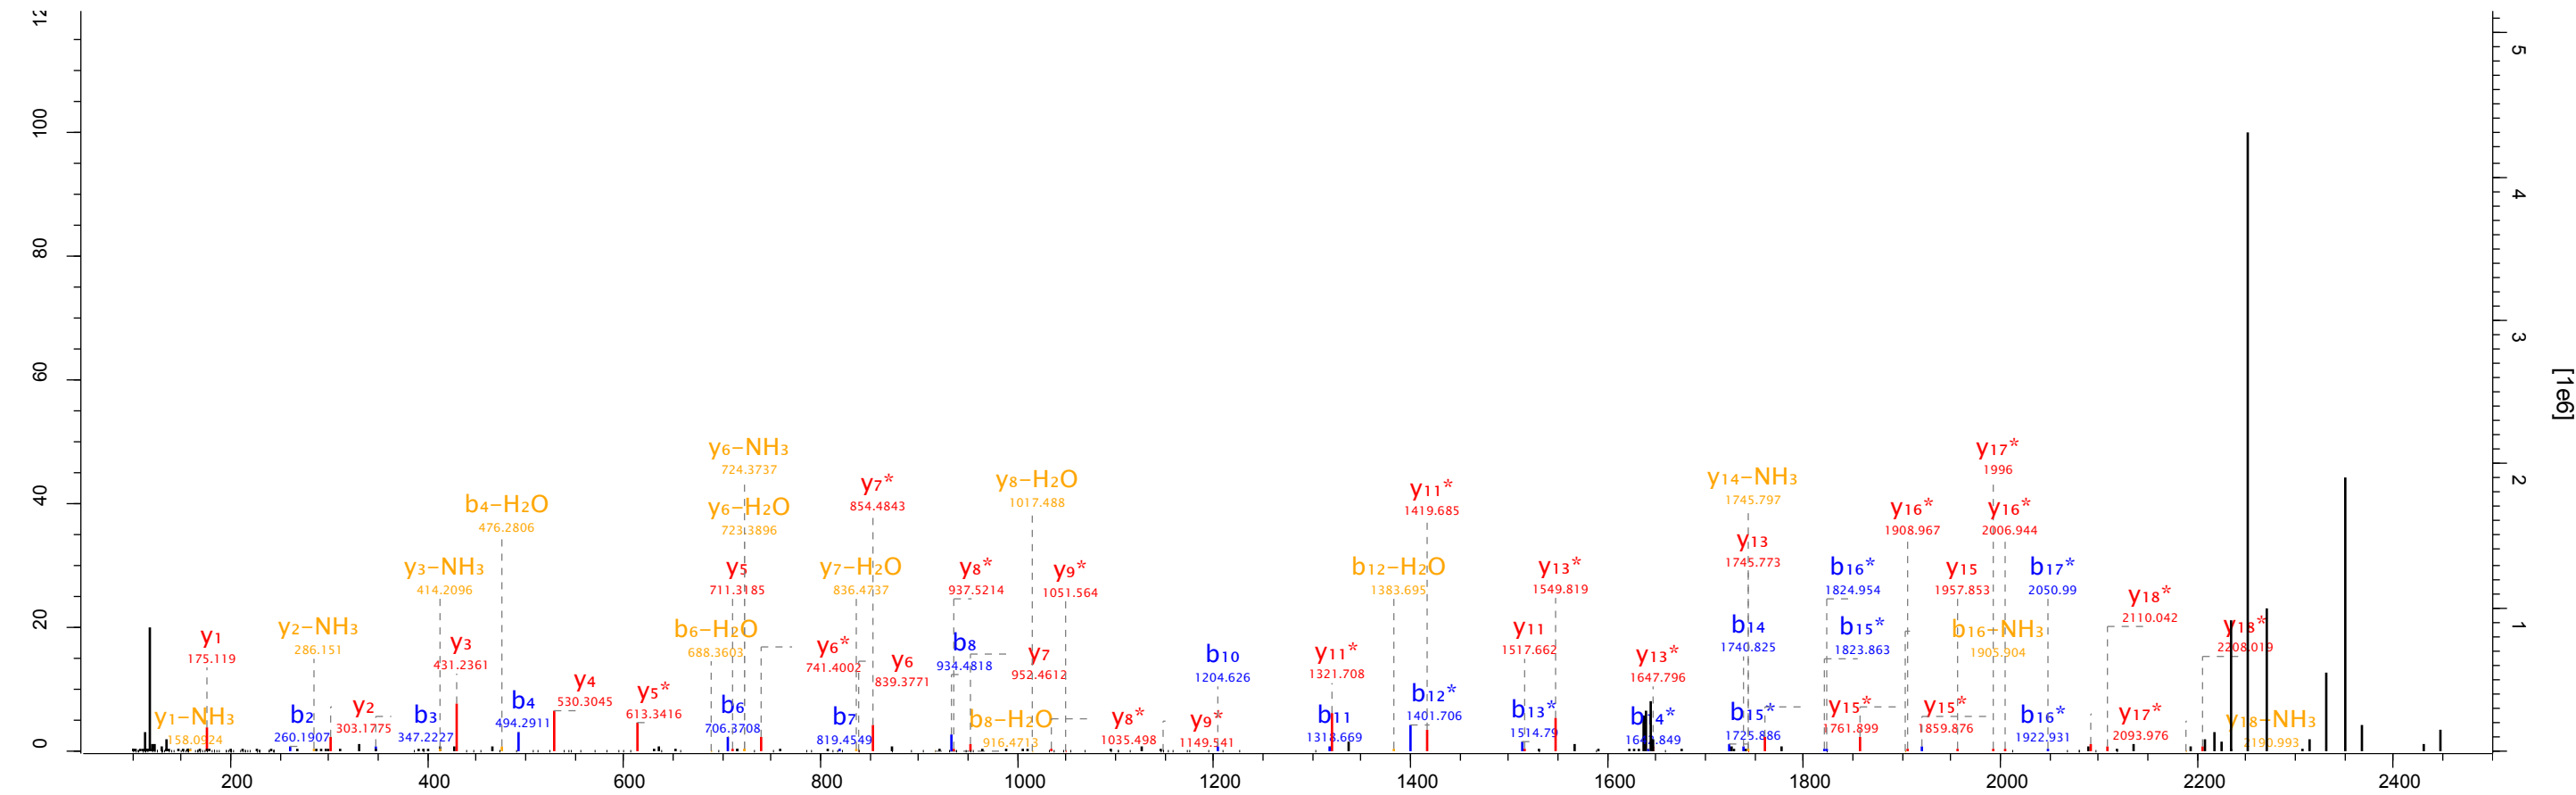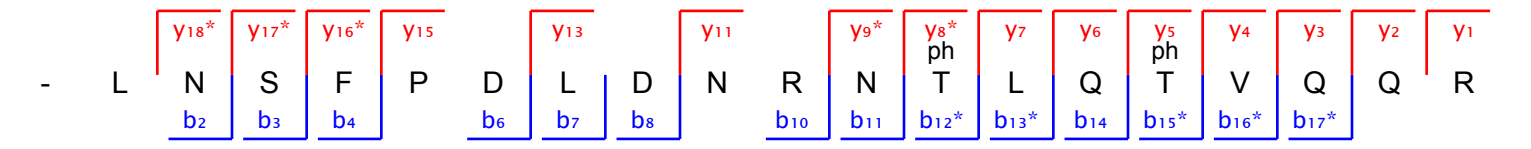

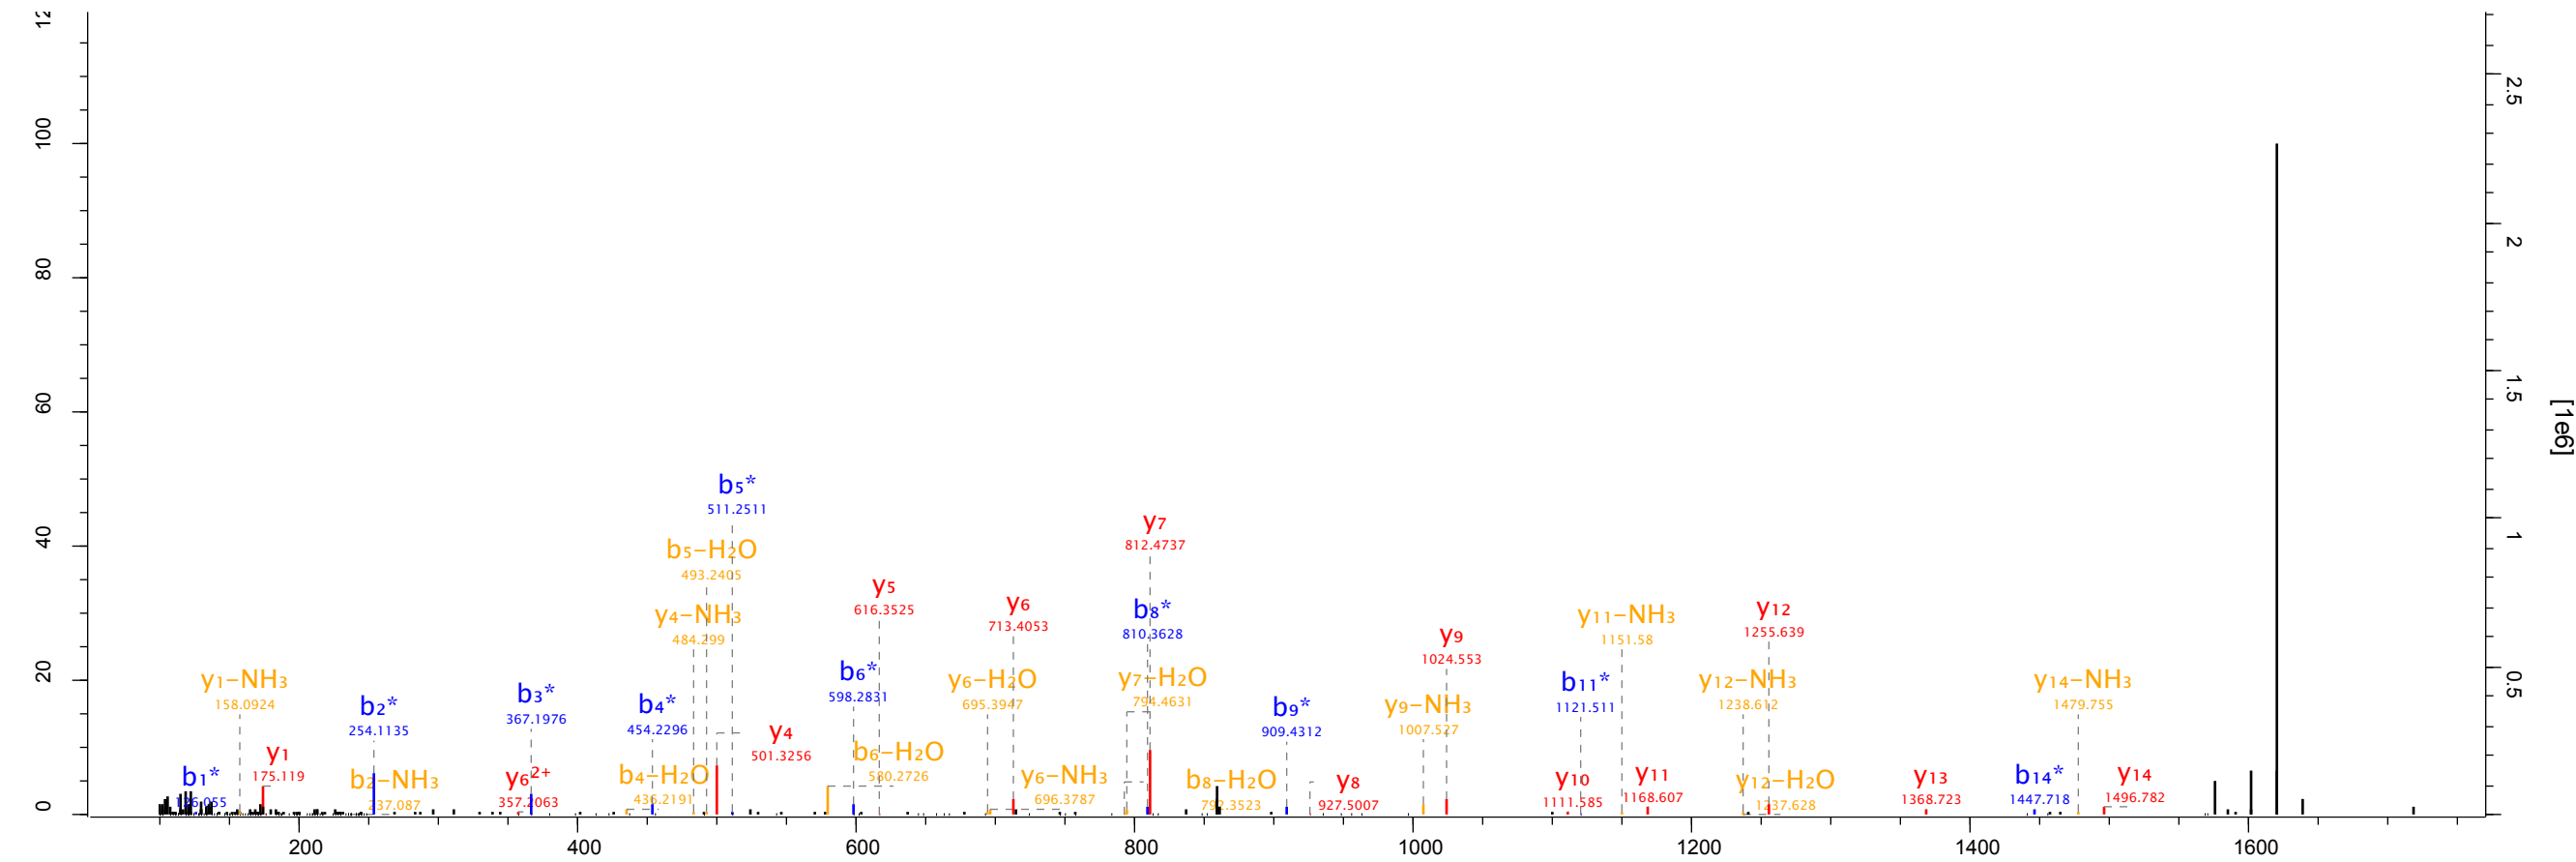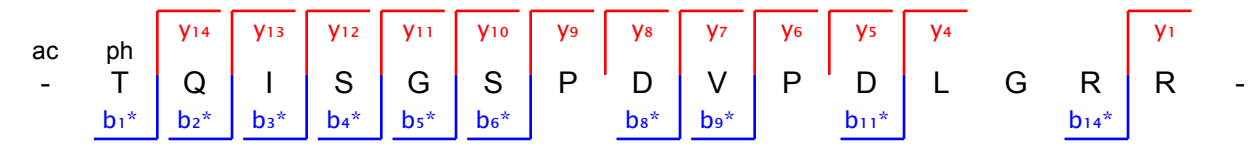

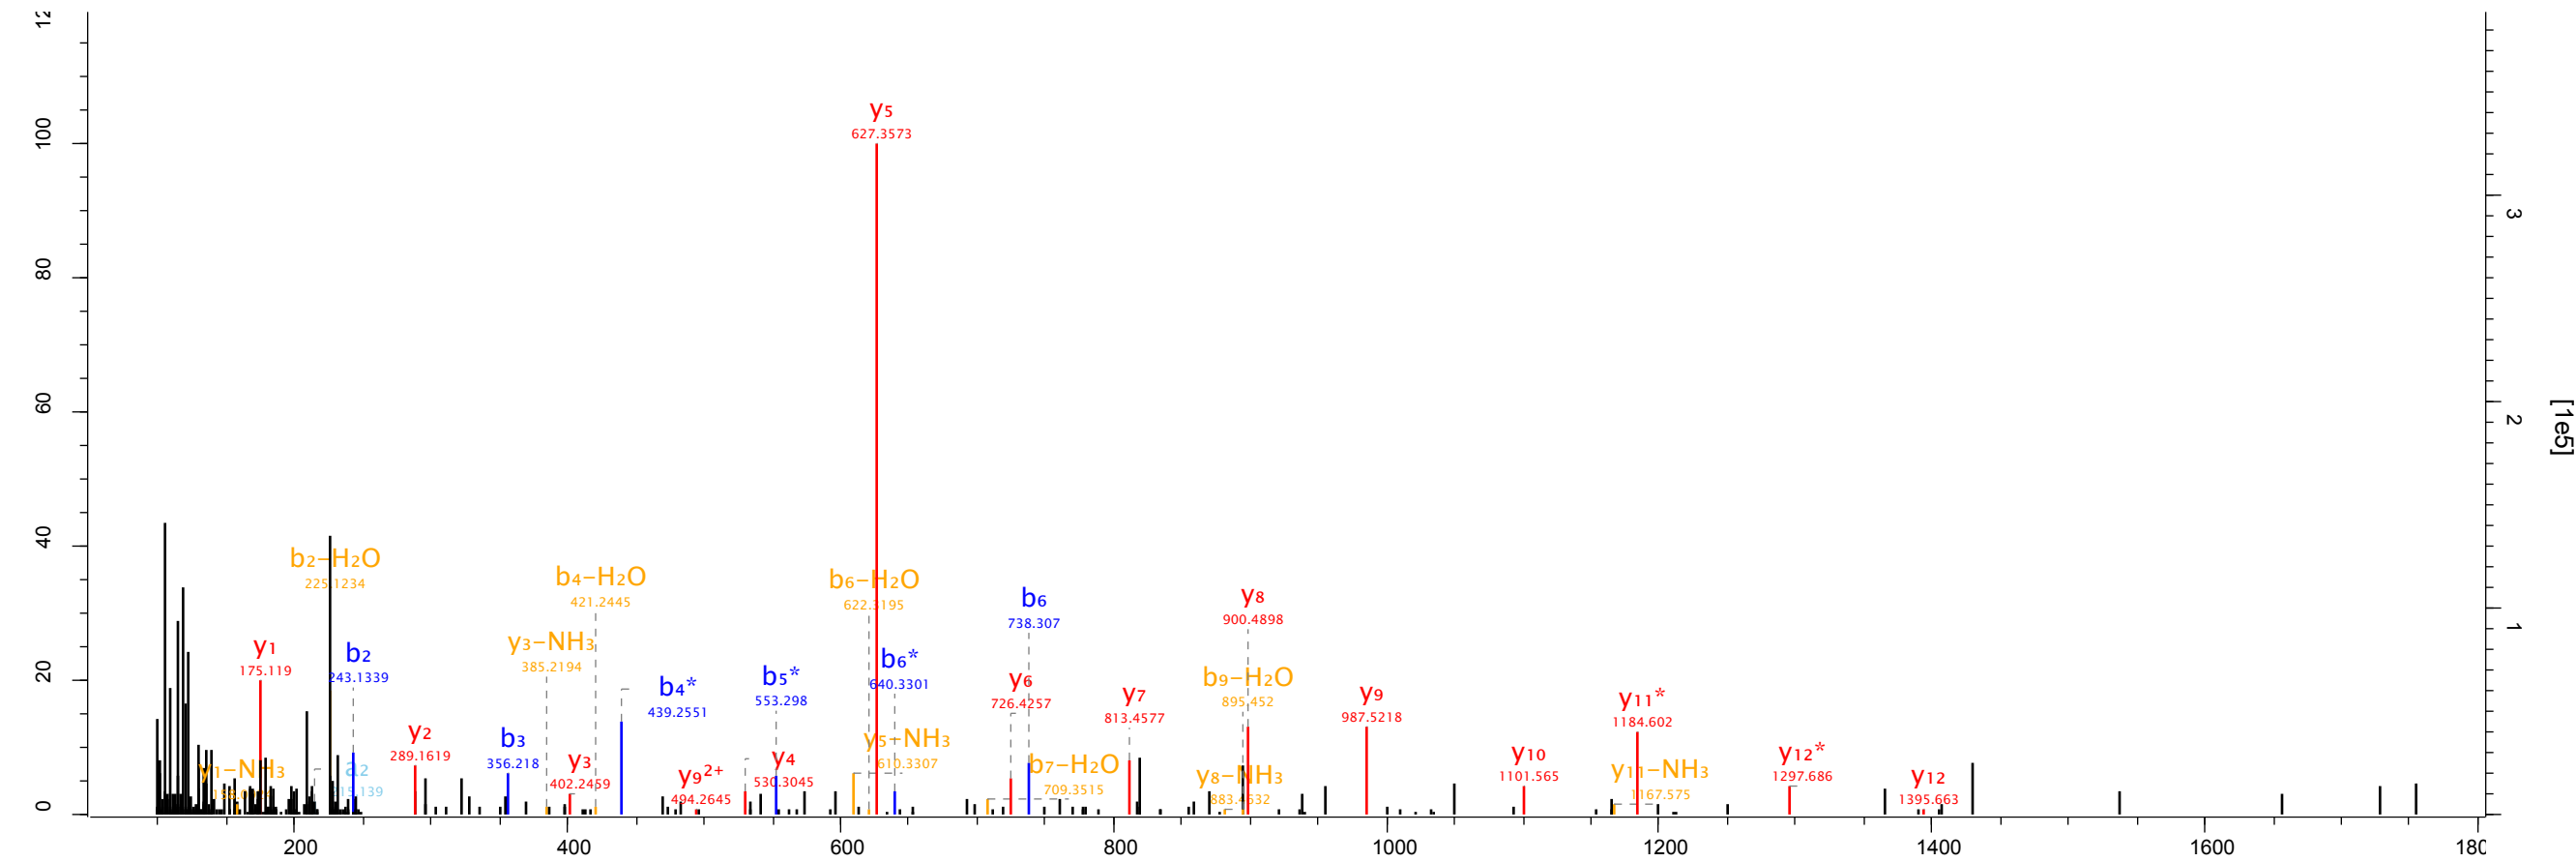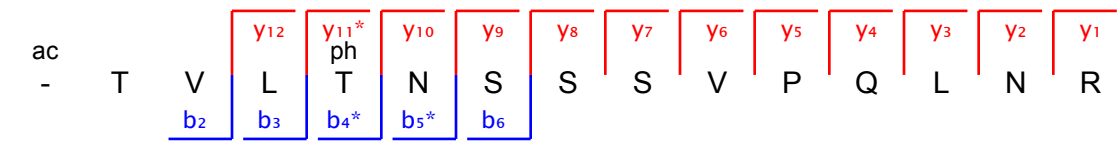

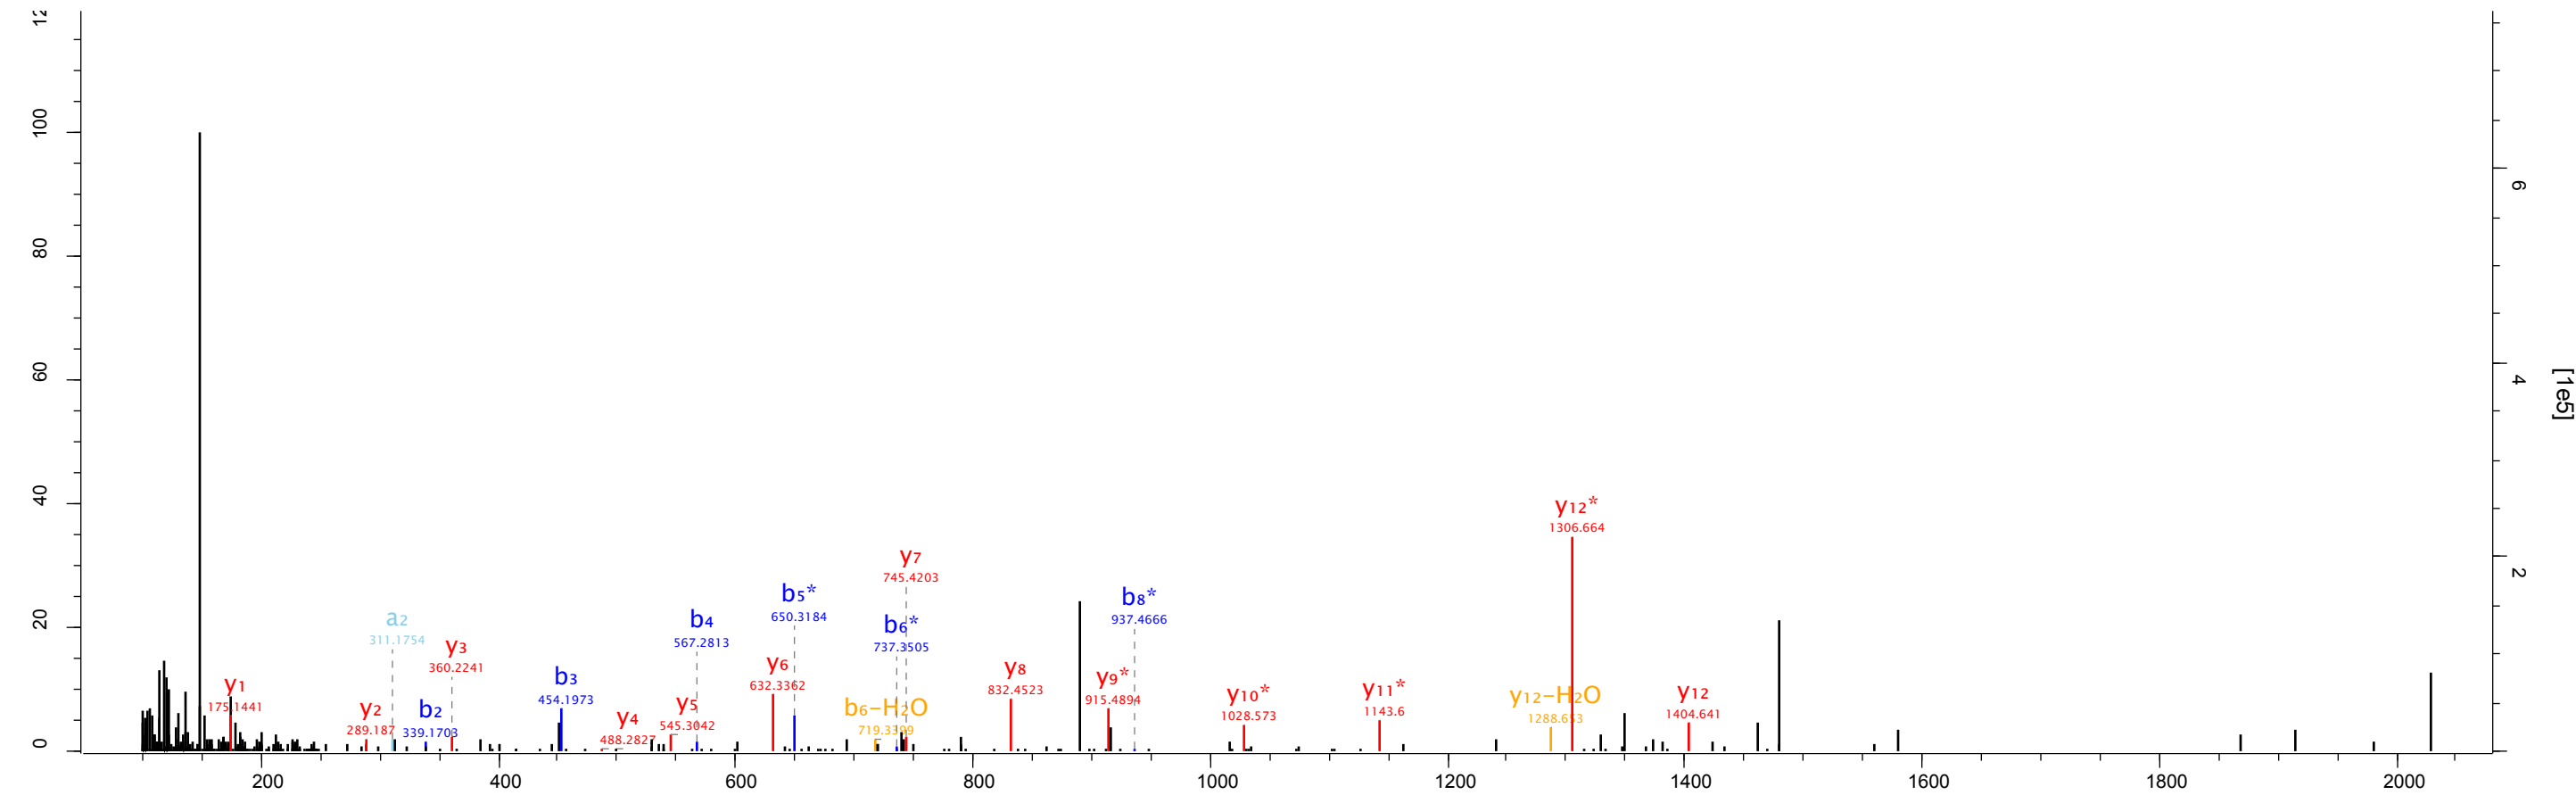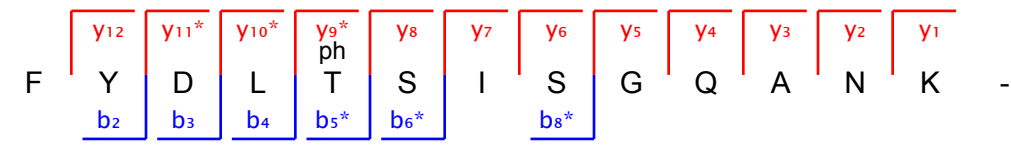



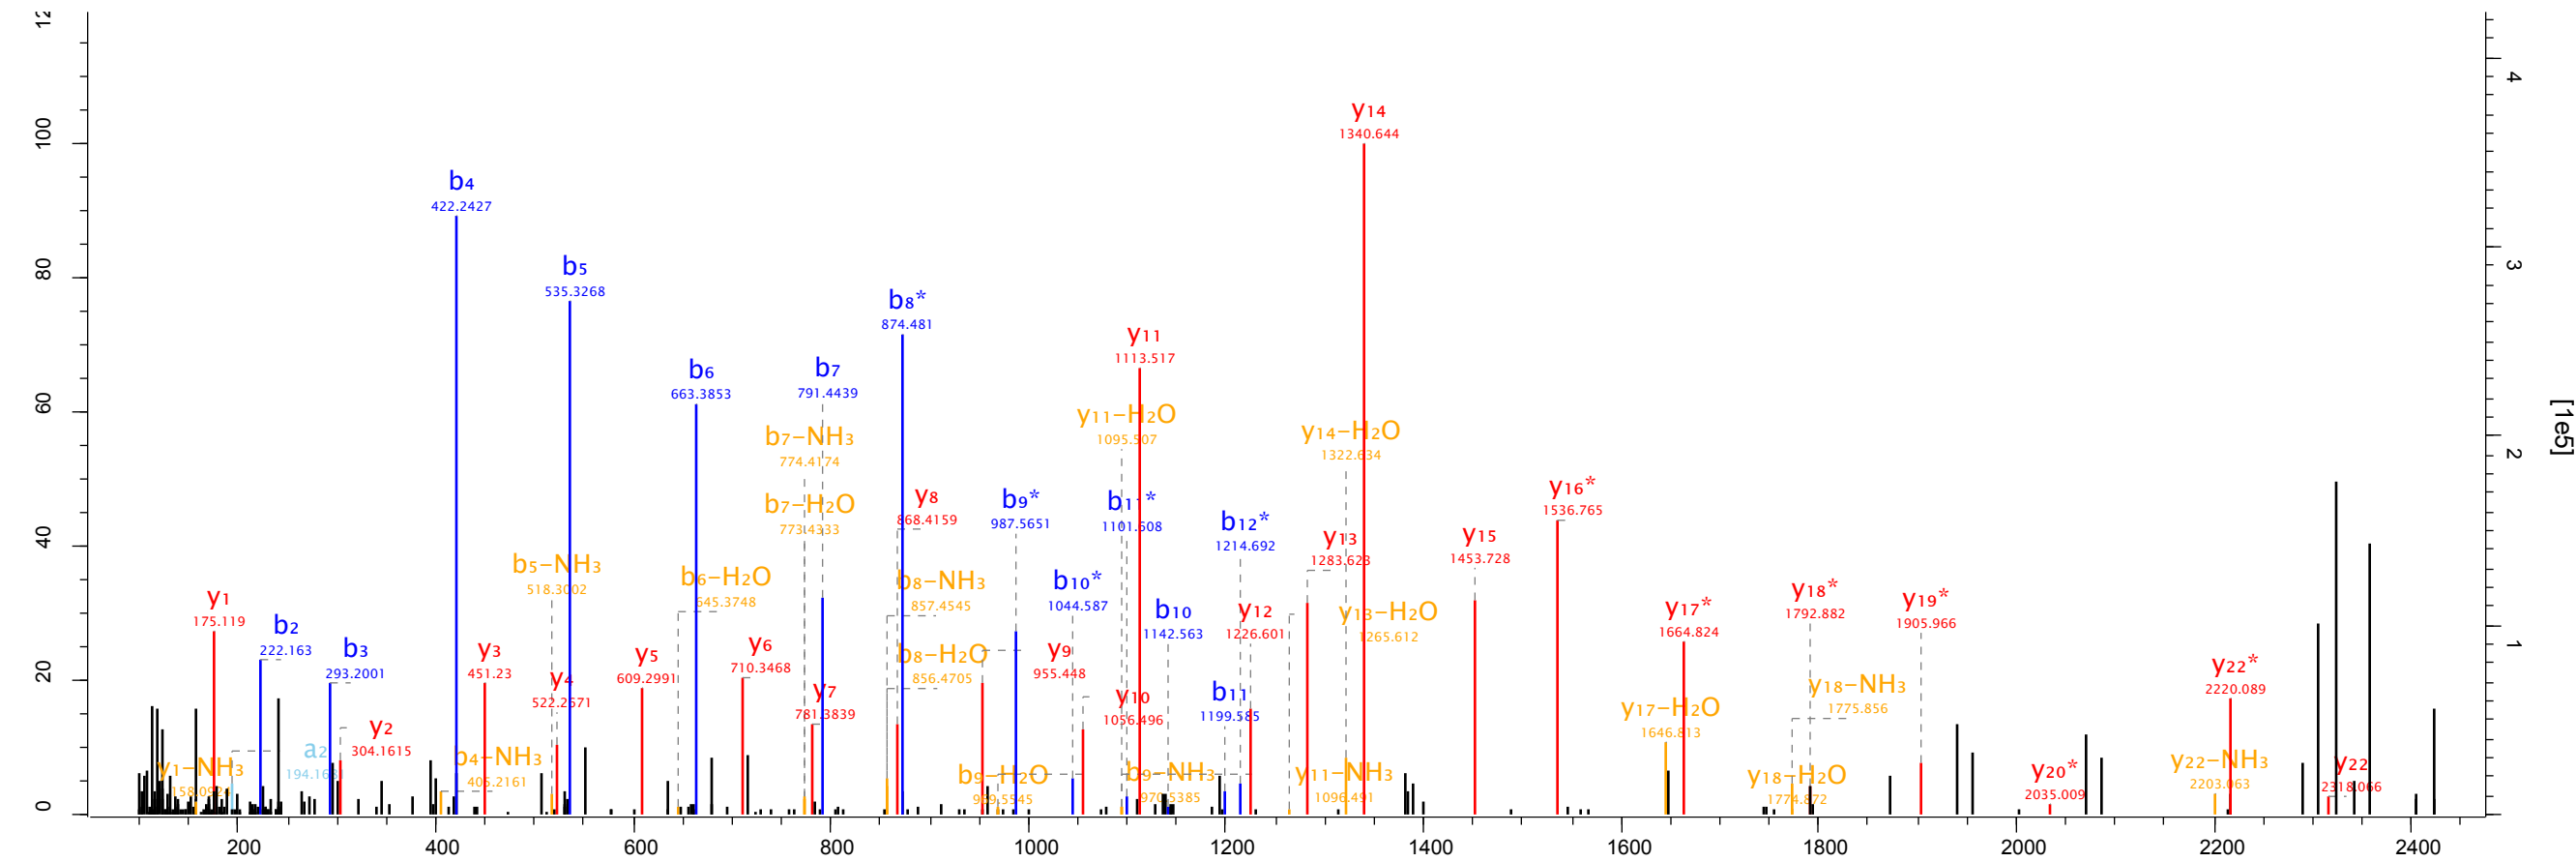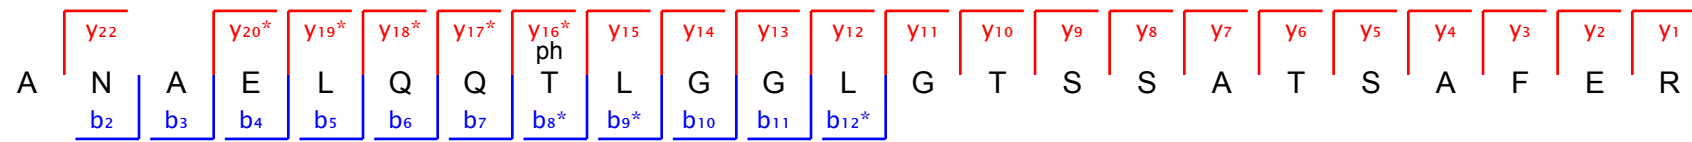

- A N A E L Q Q T L G G L G T S S A T S A F E R -

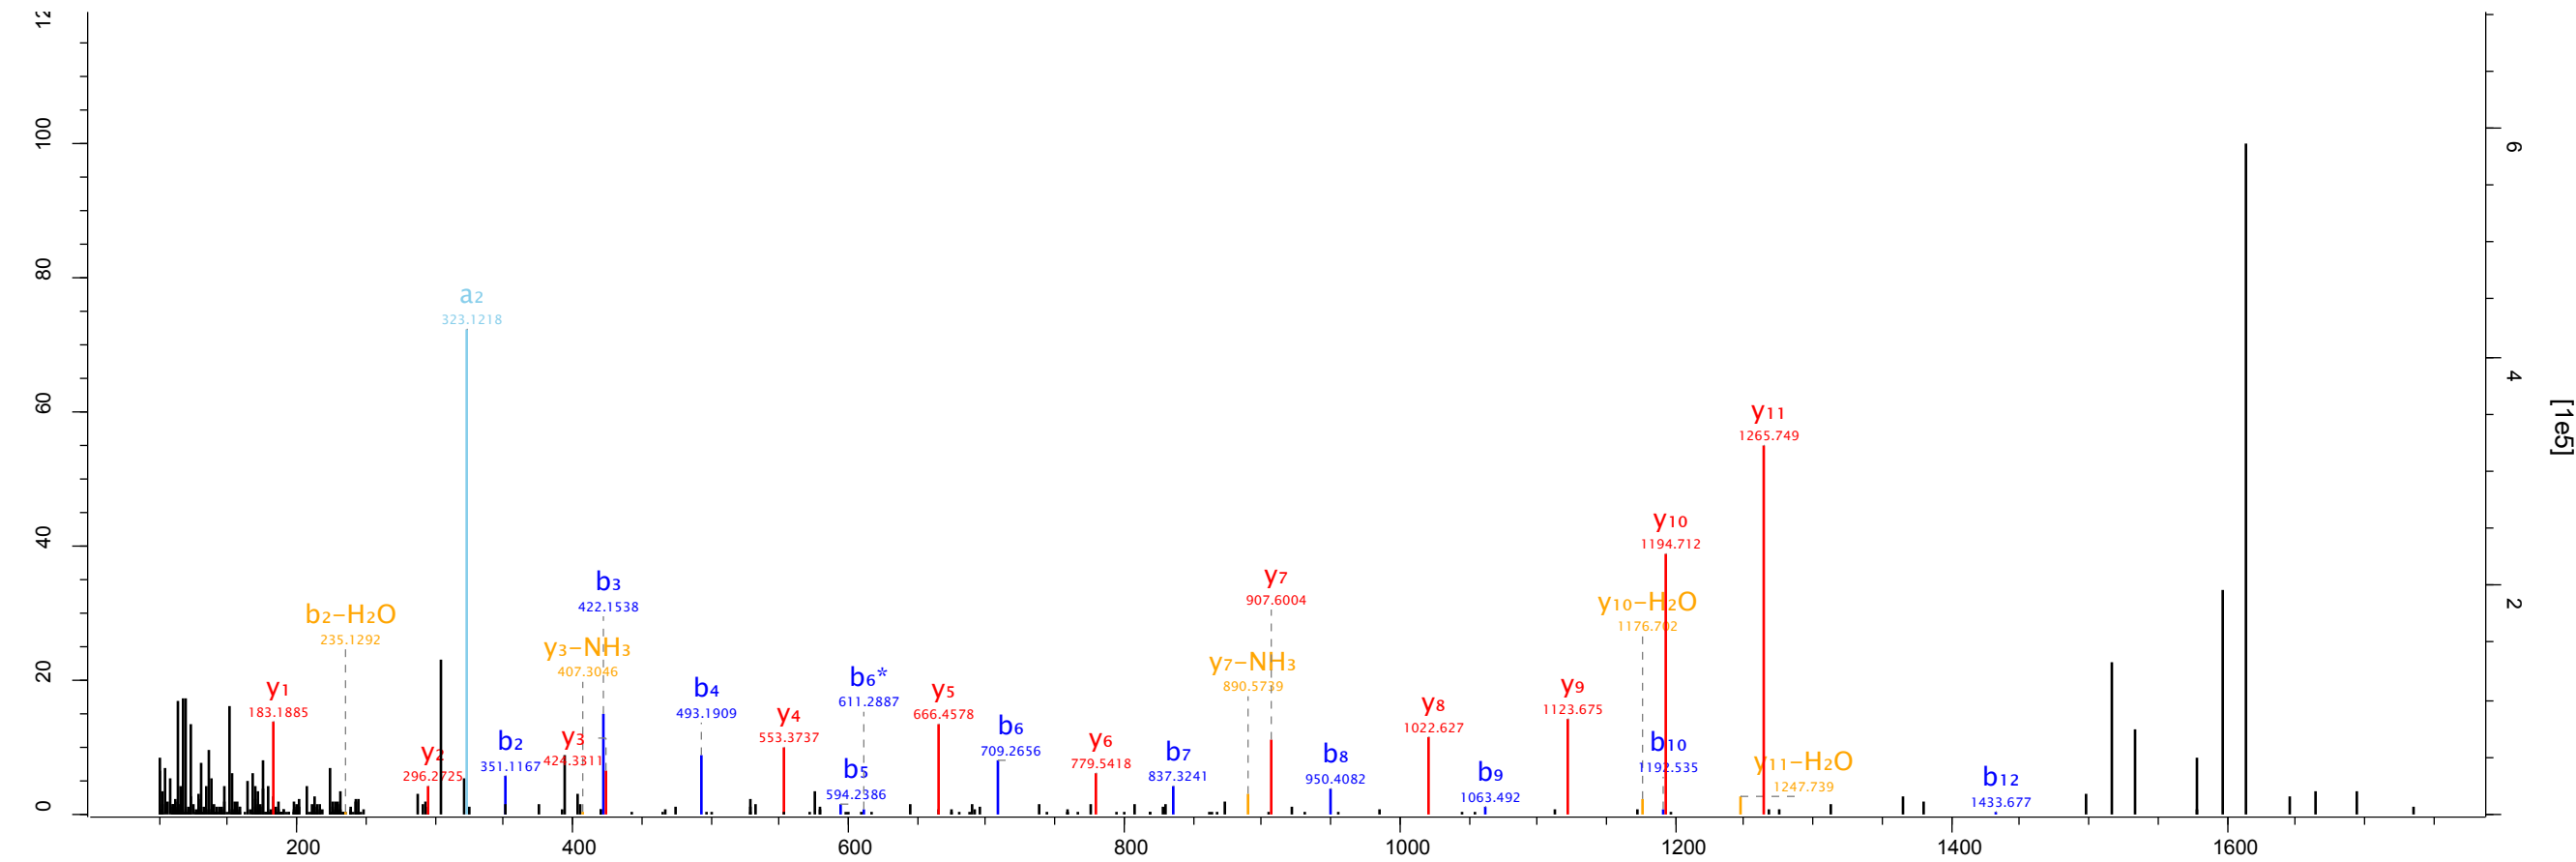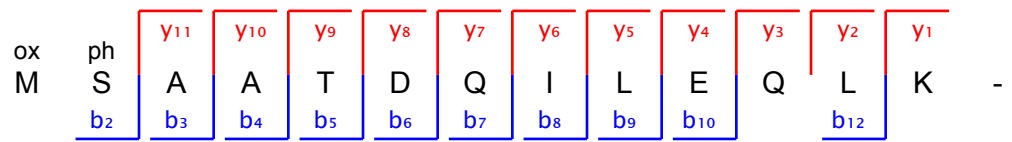

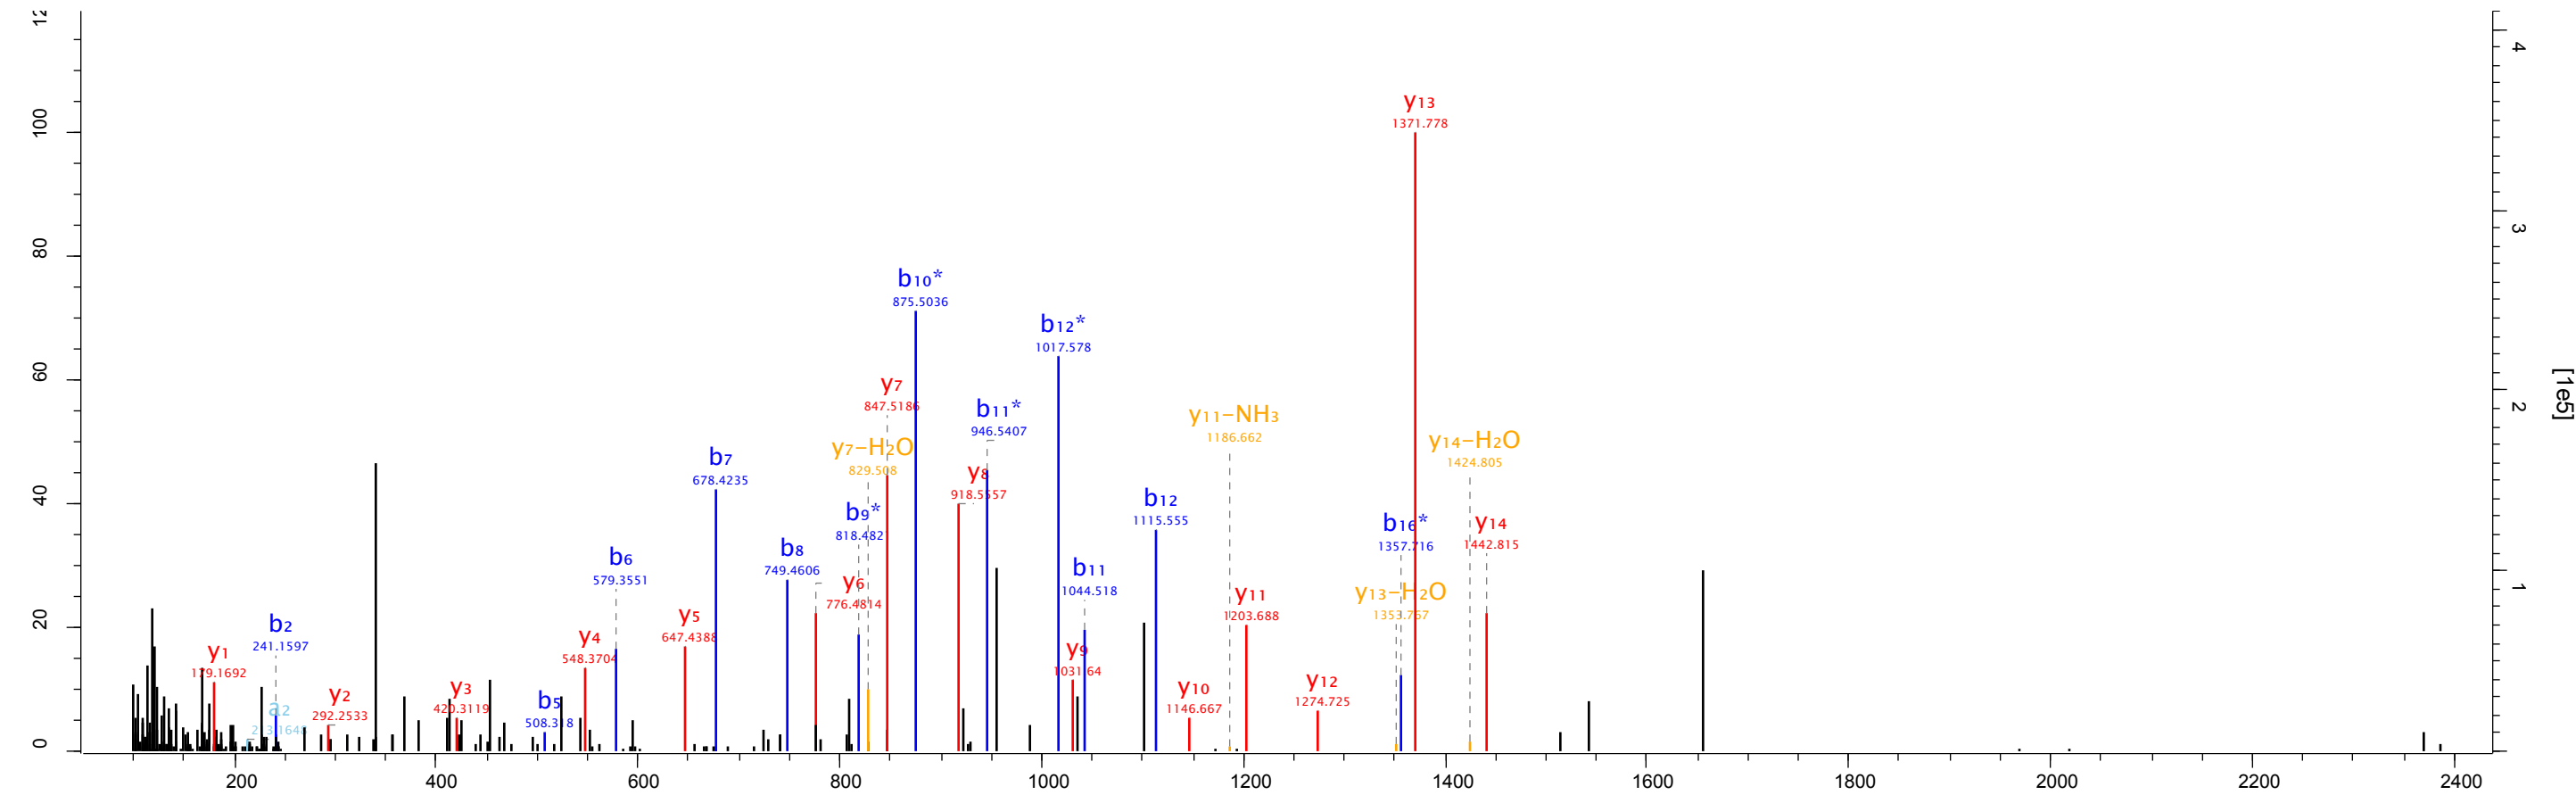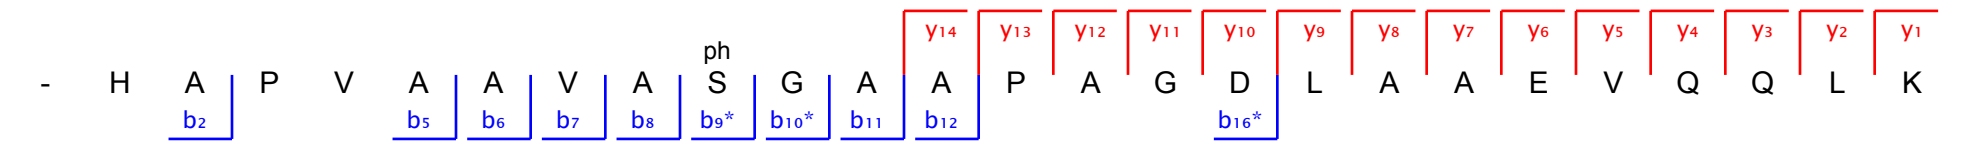

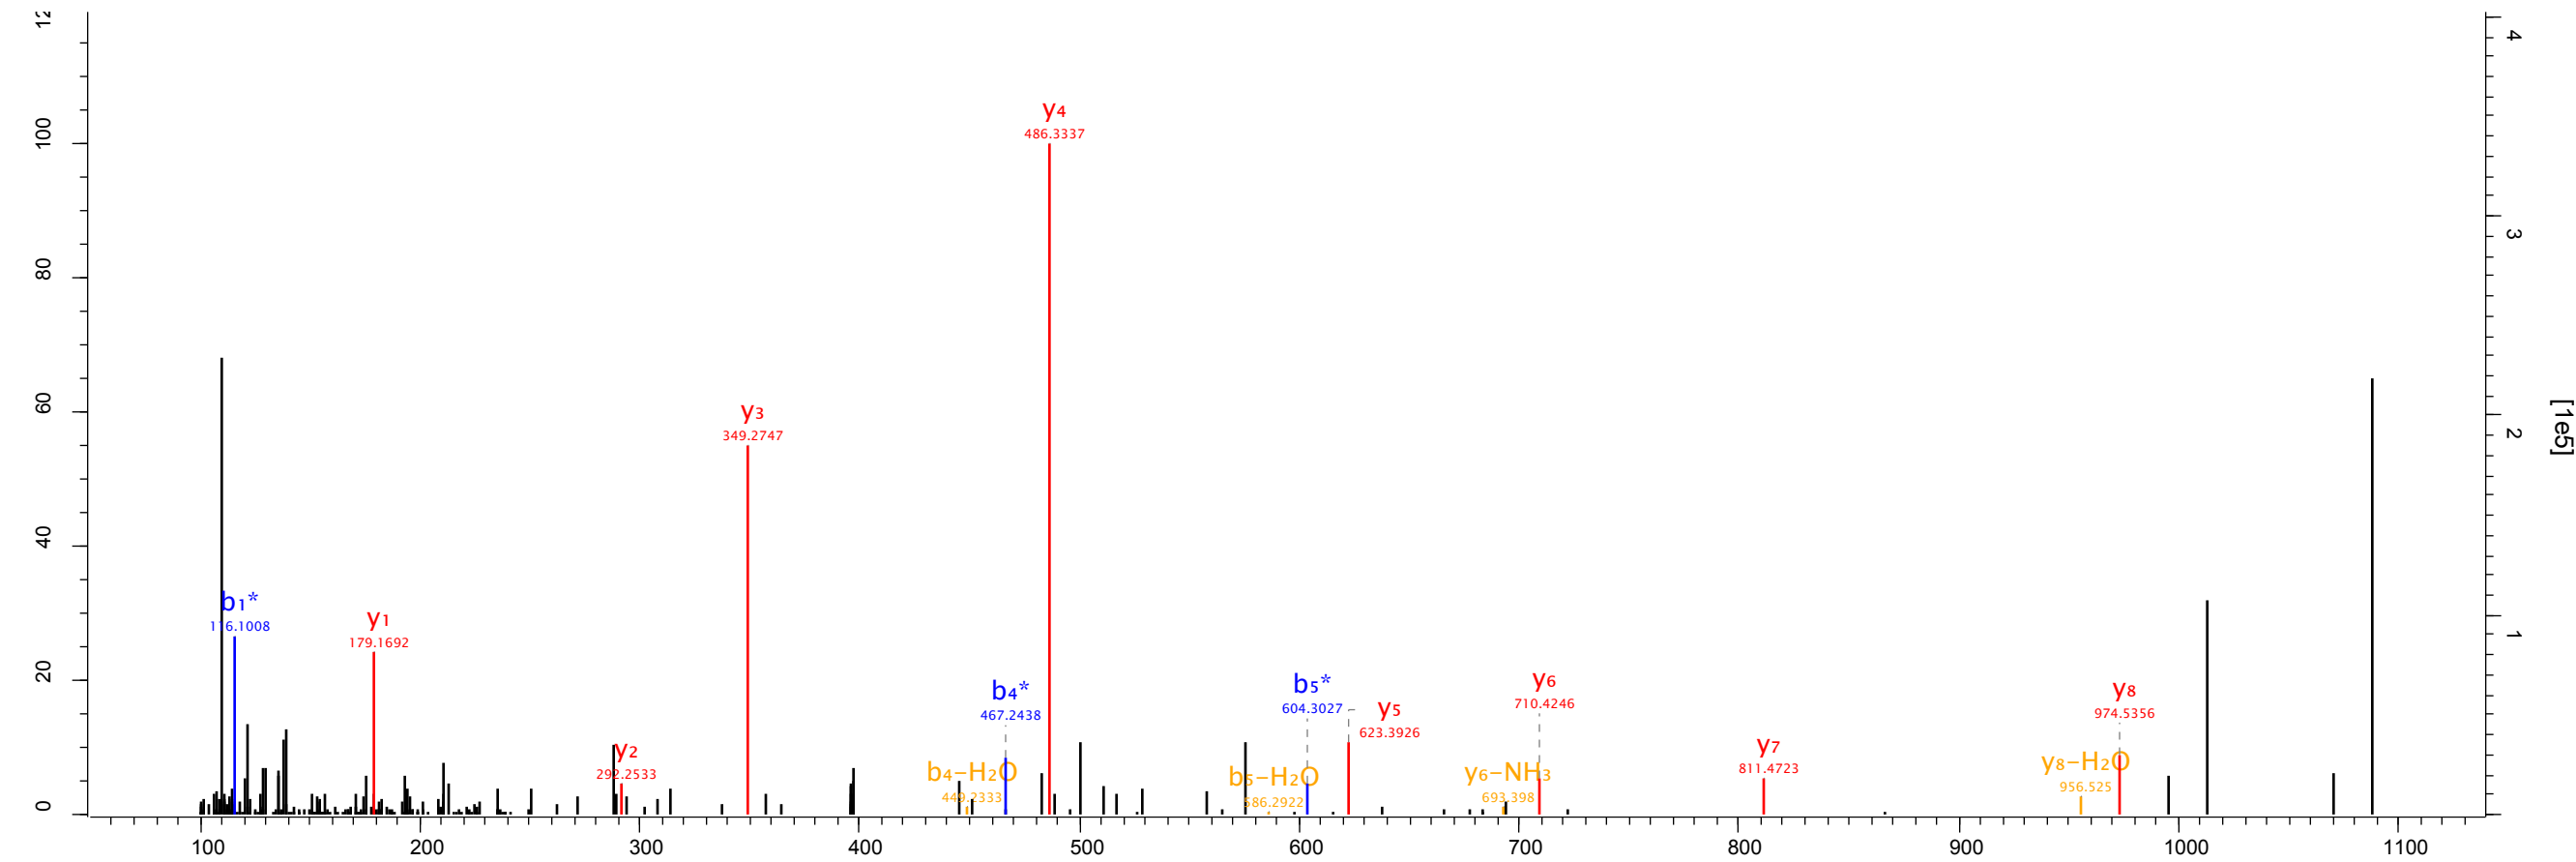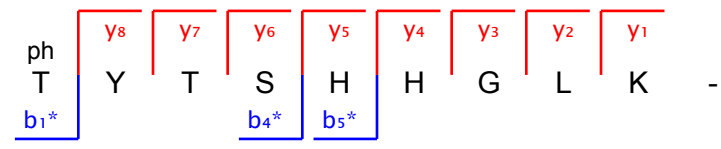

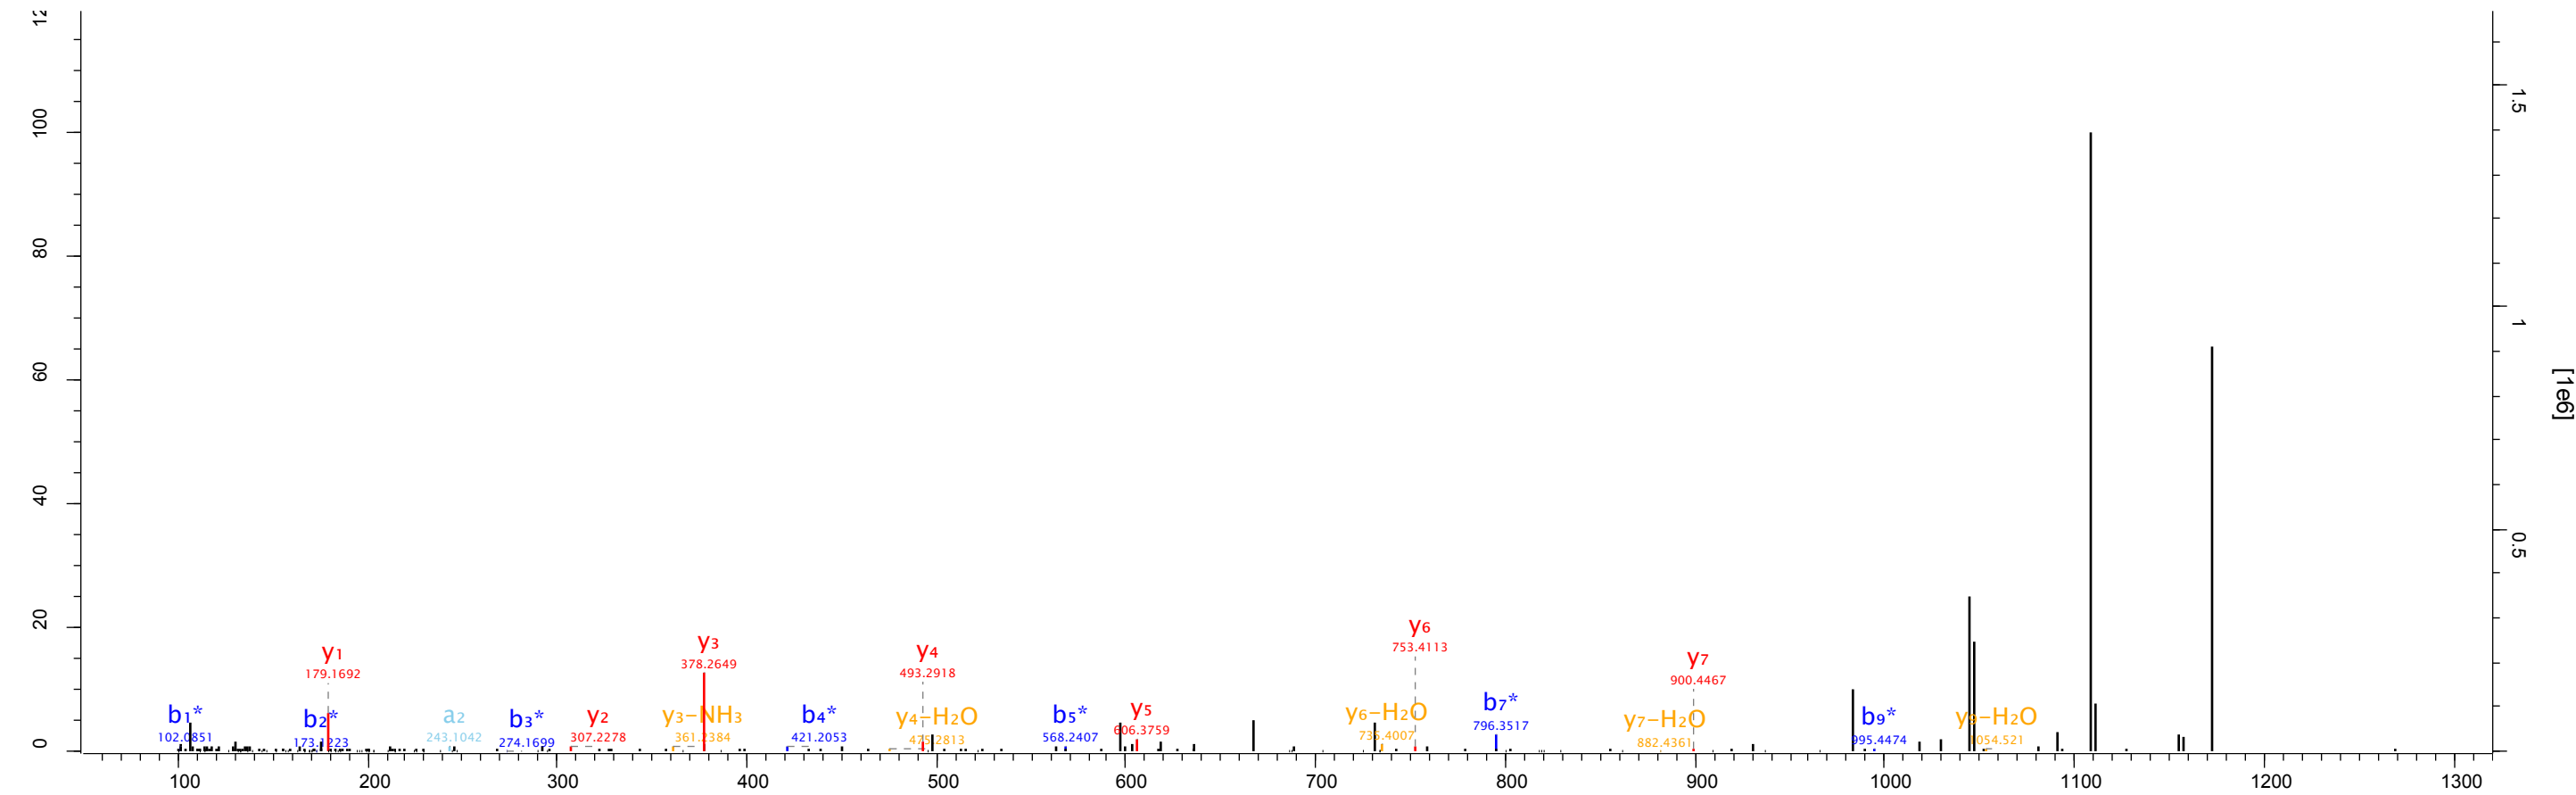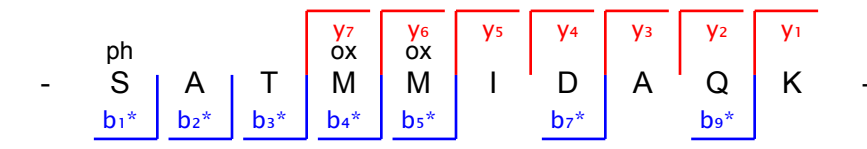

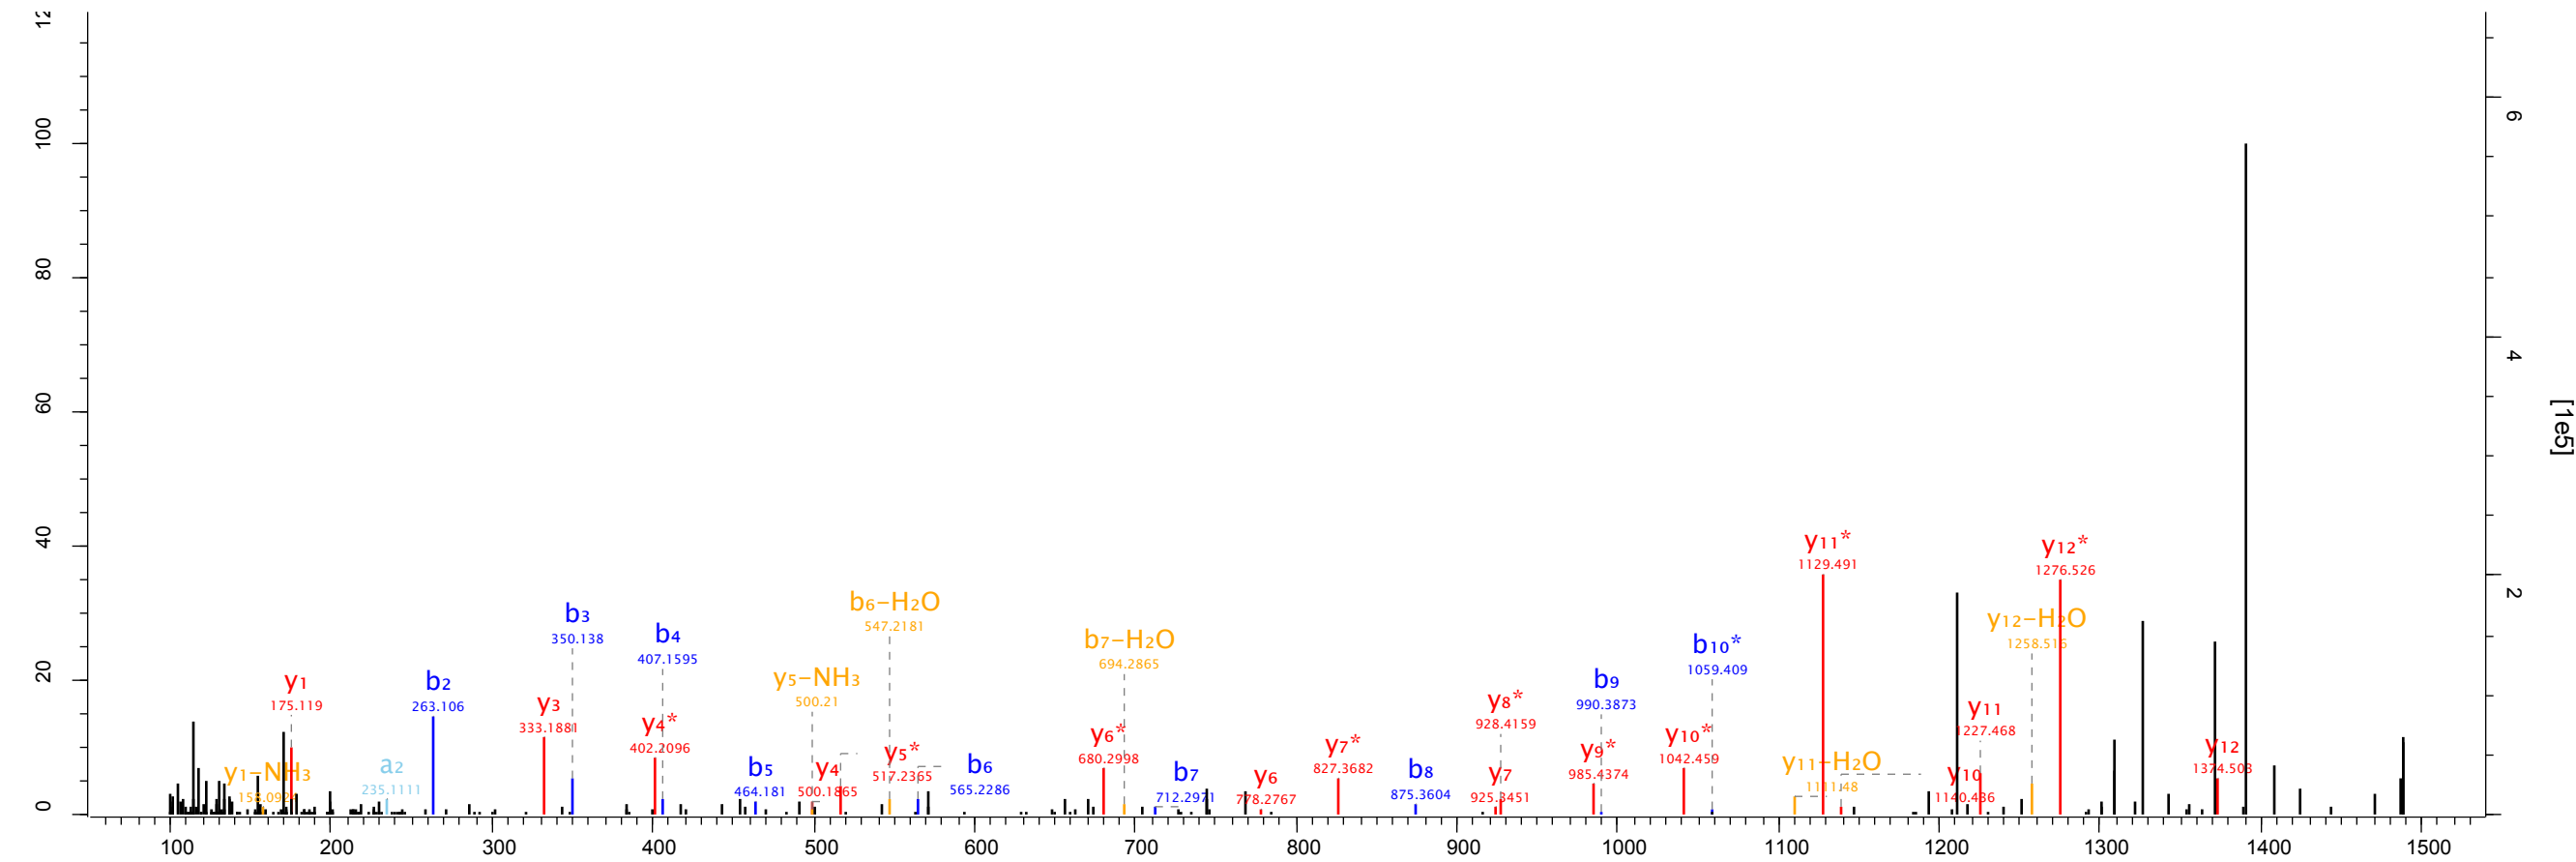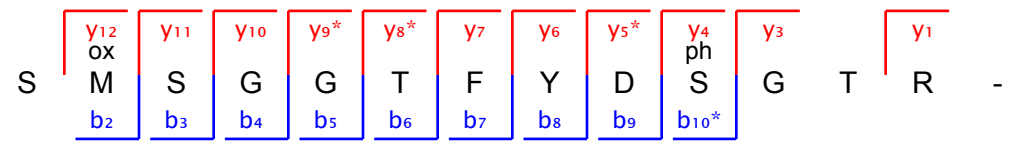

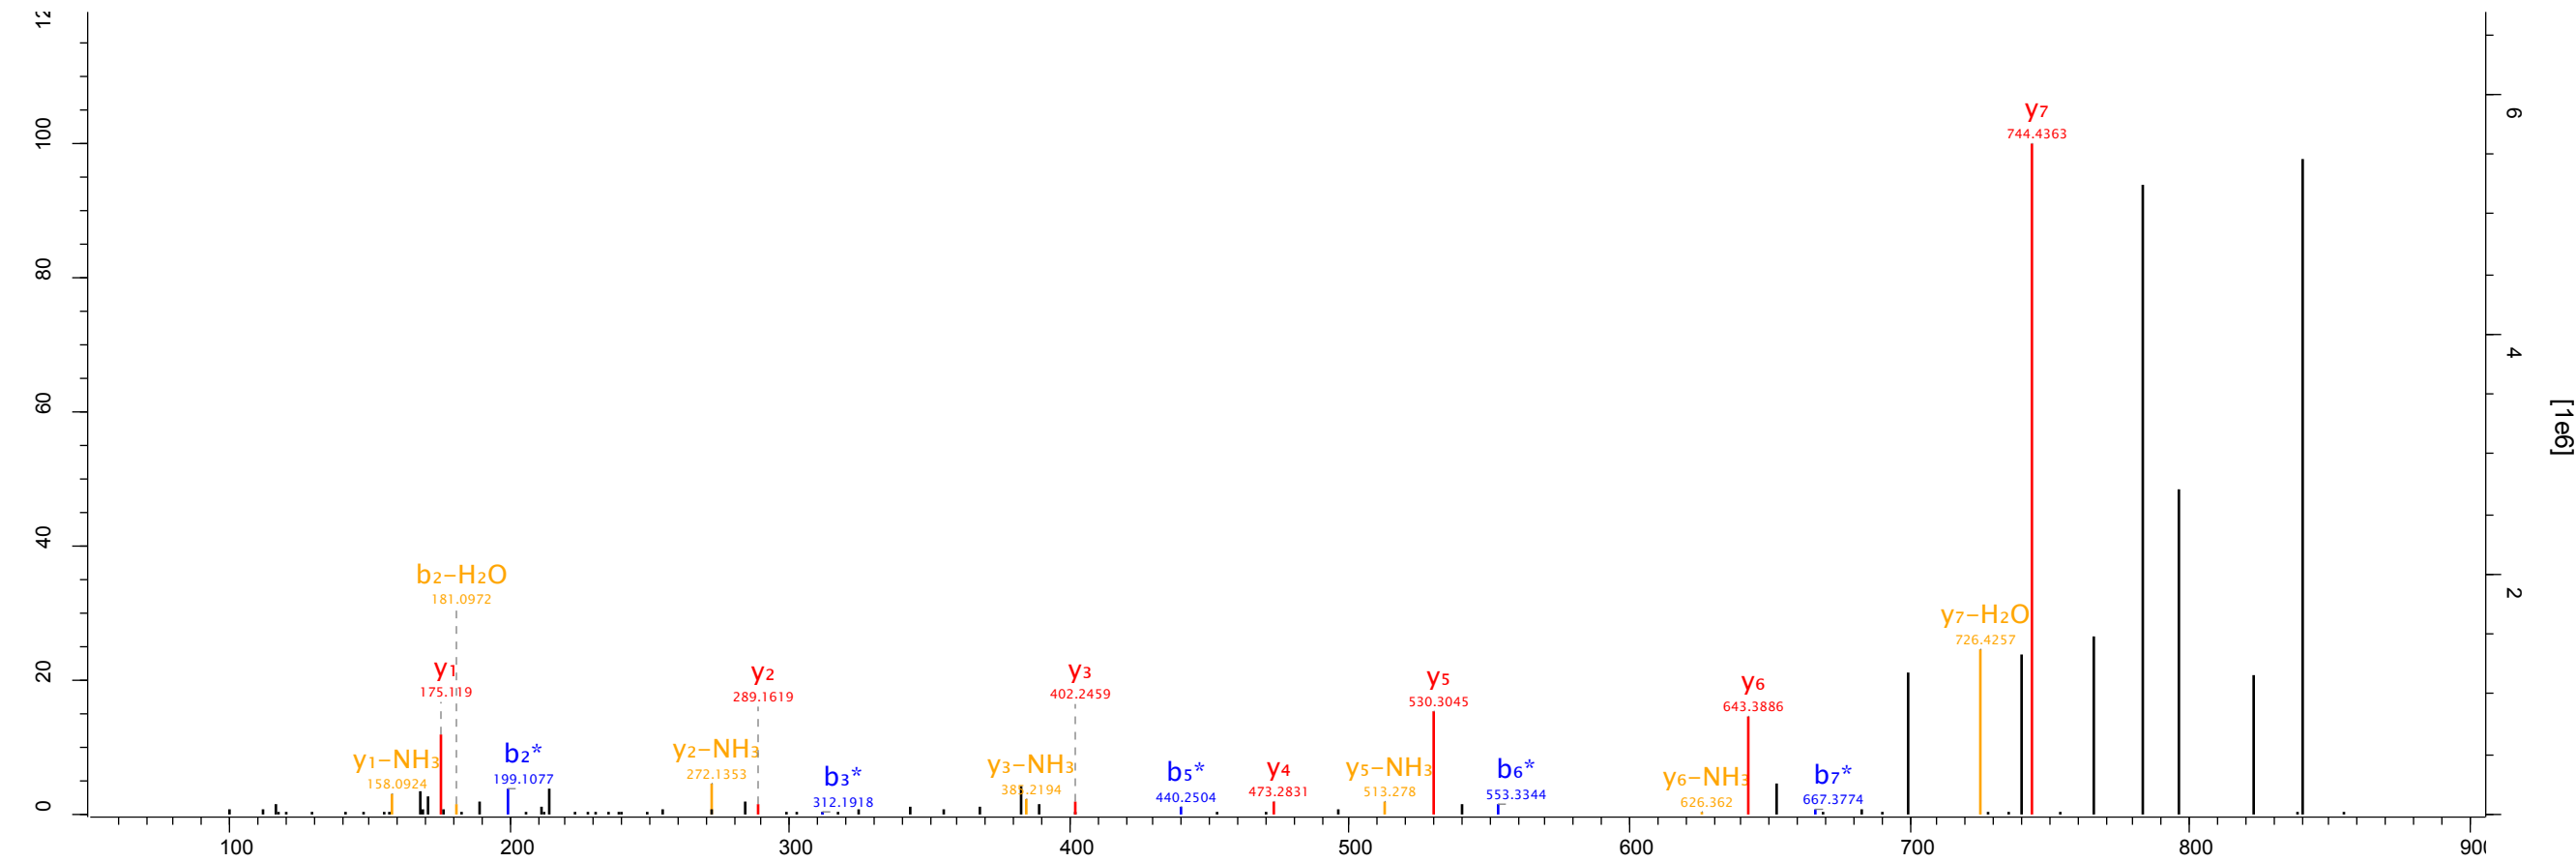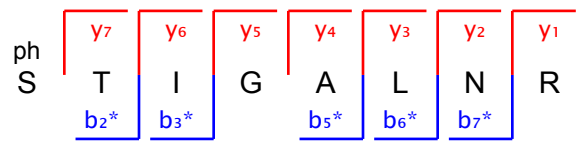

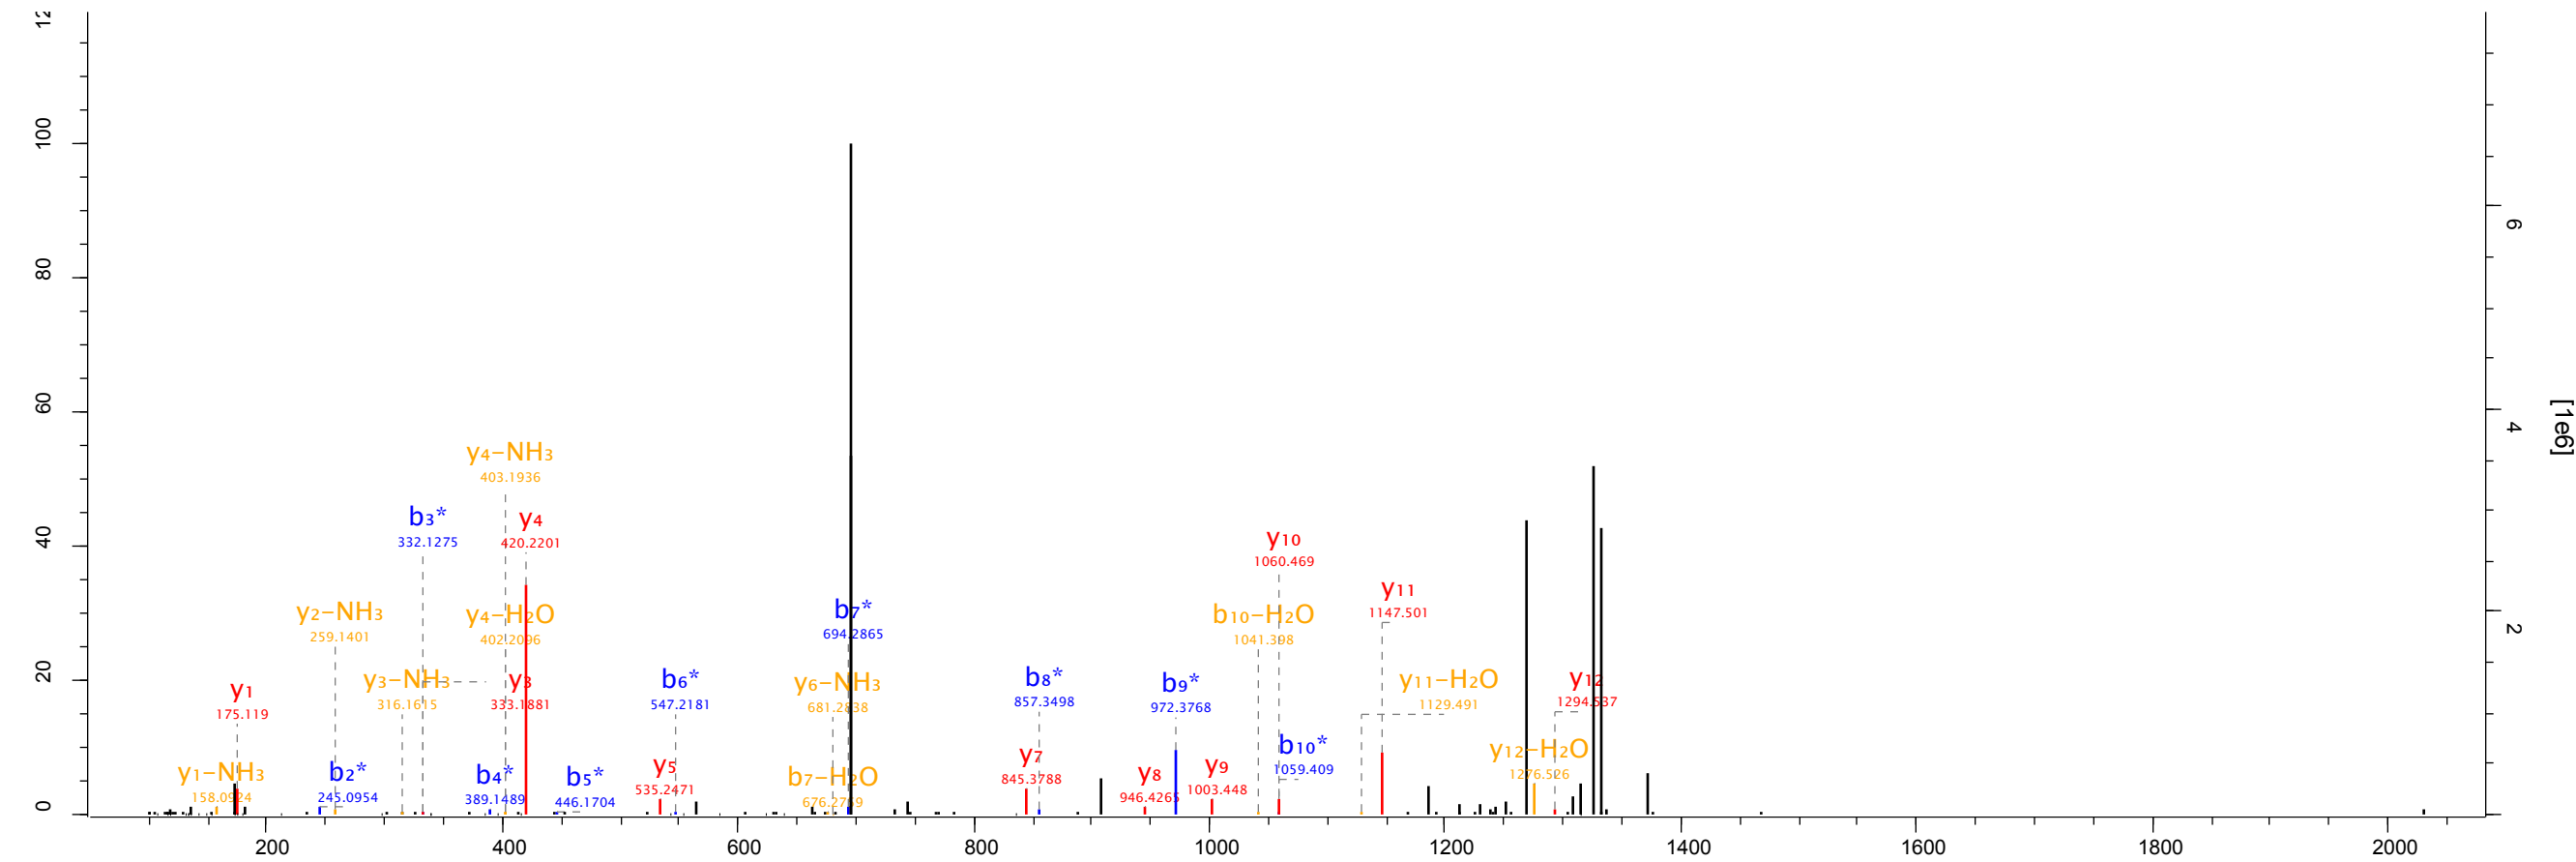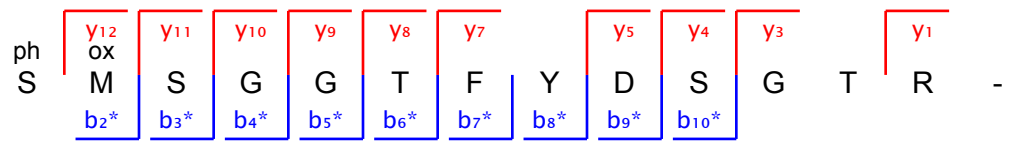



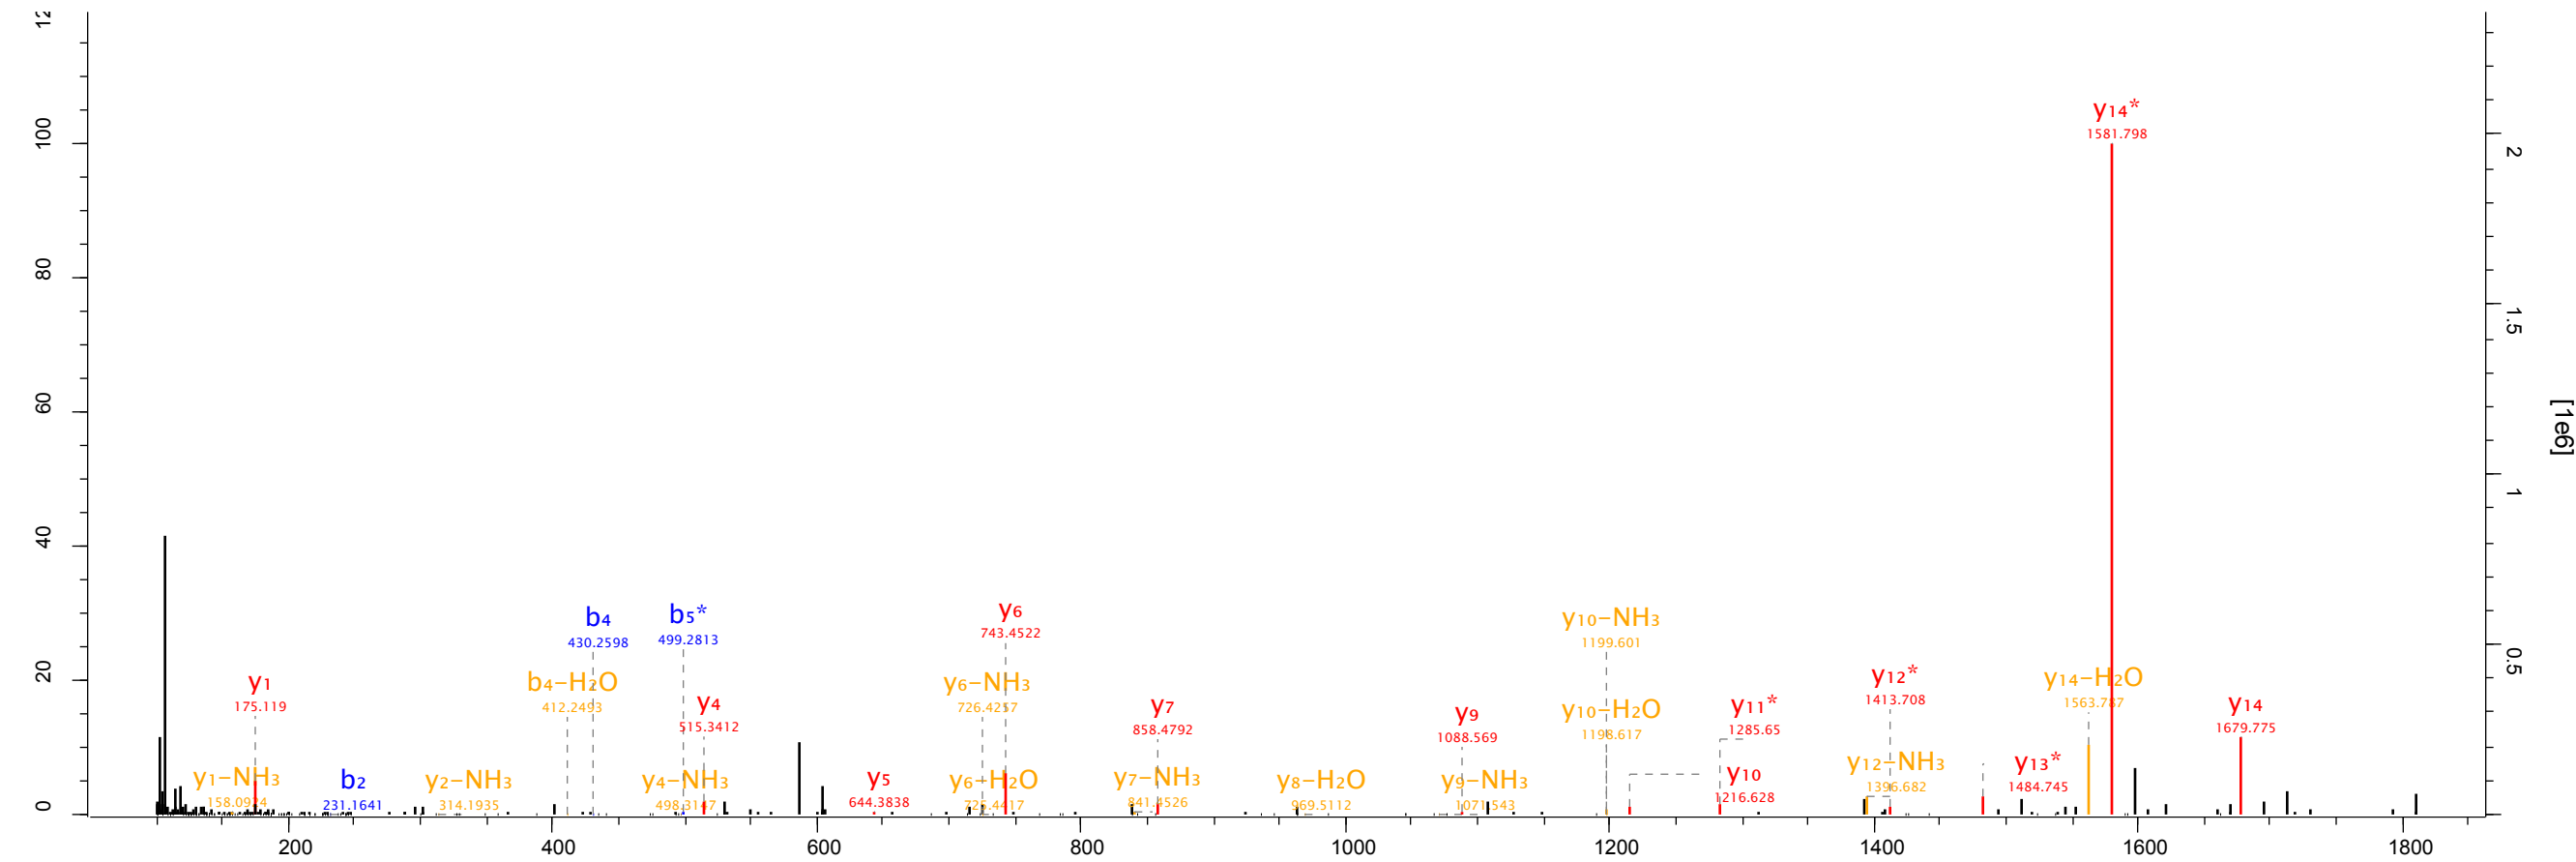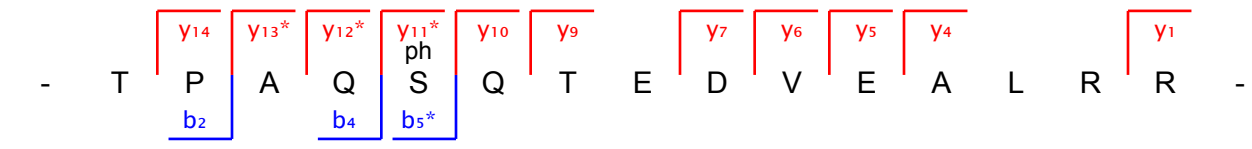

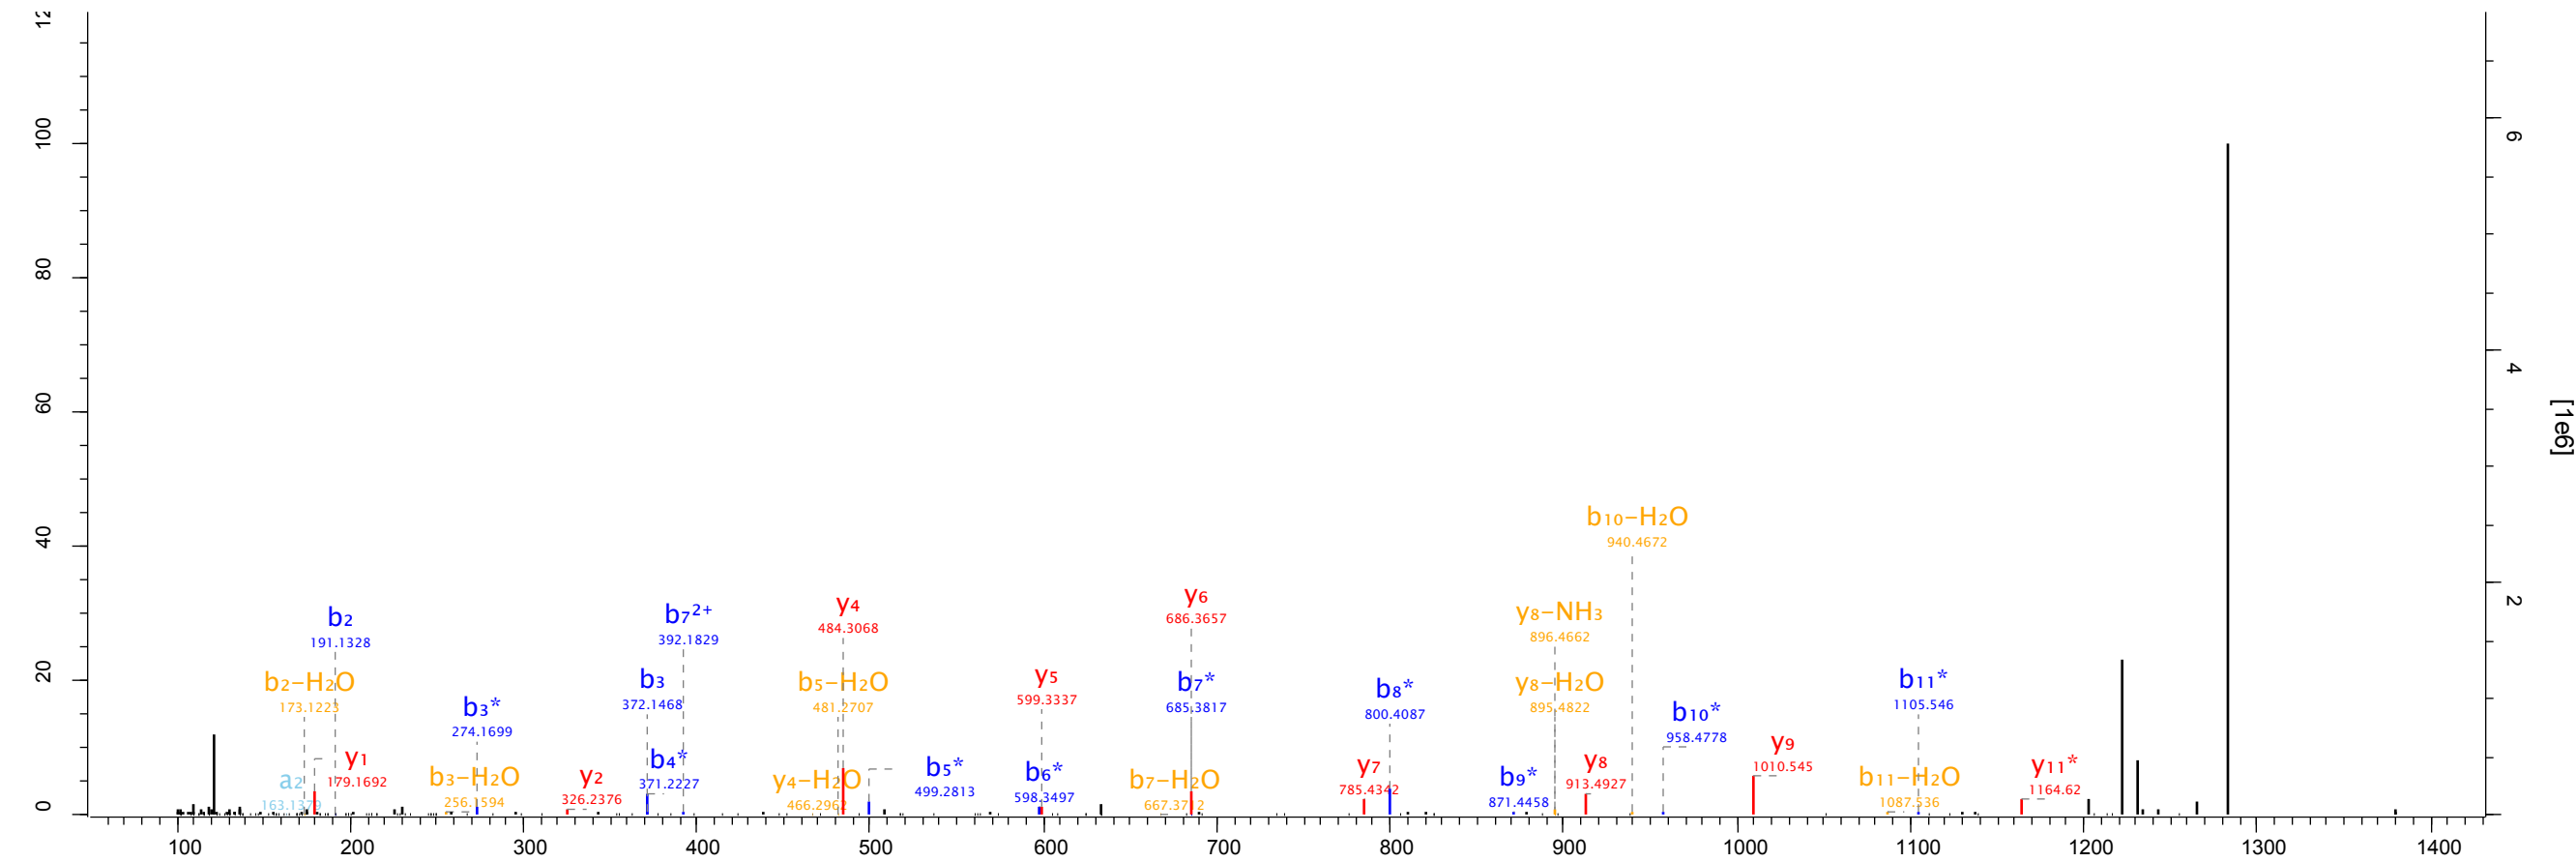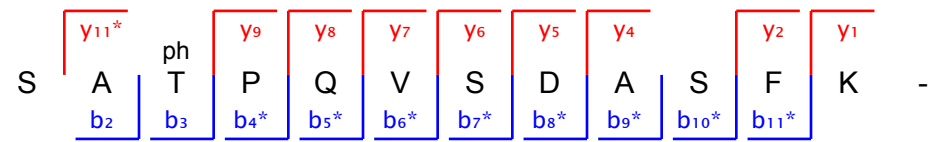

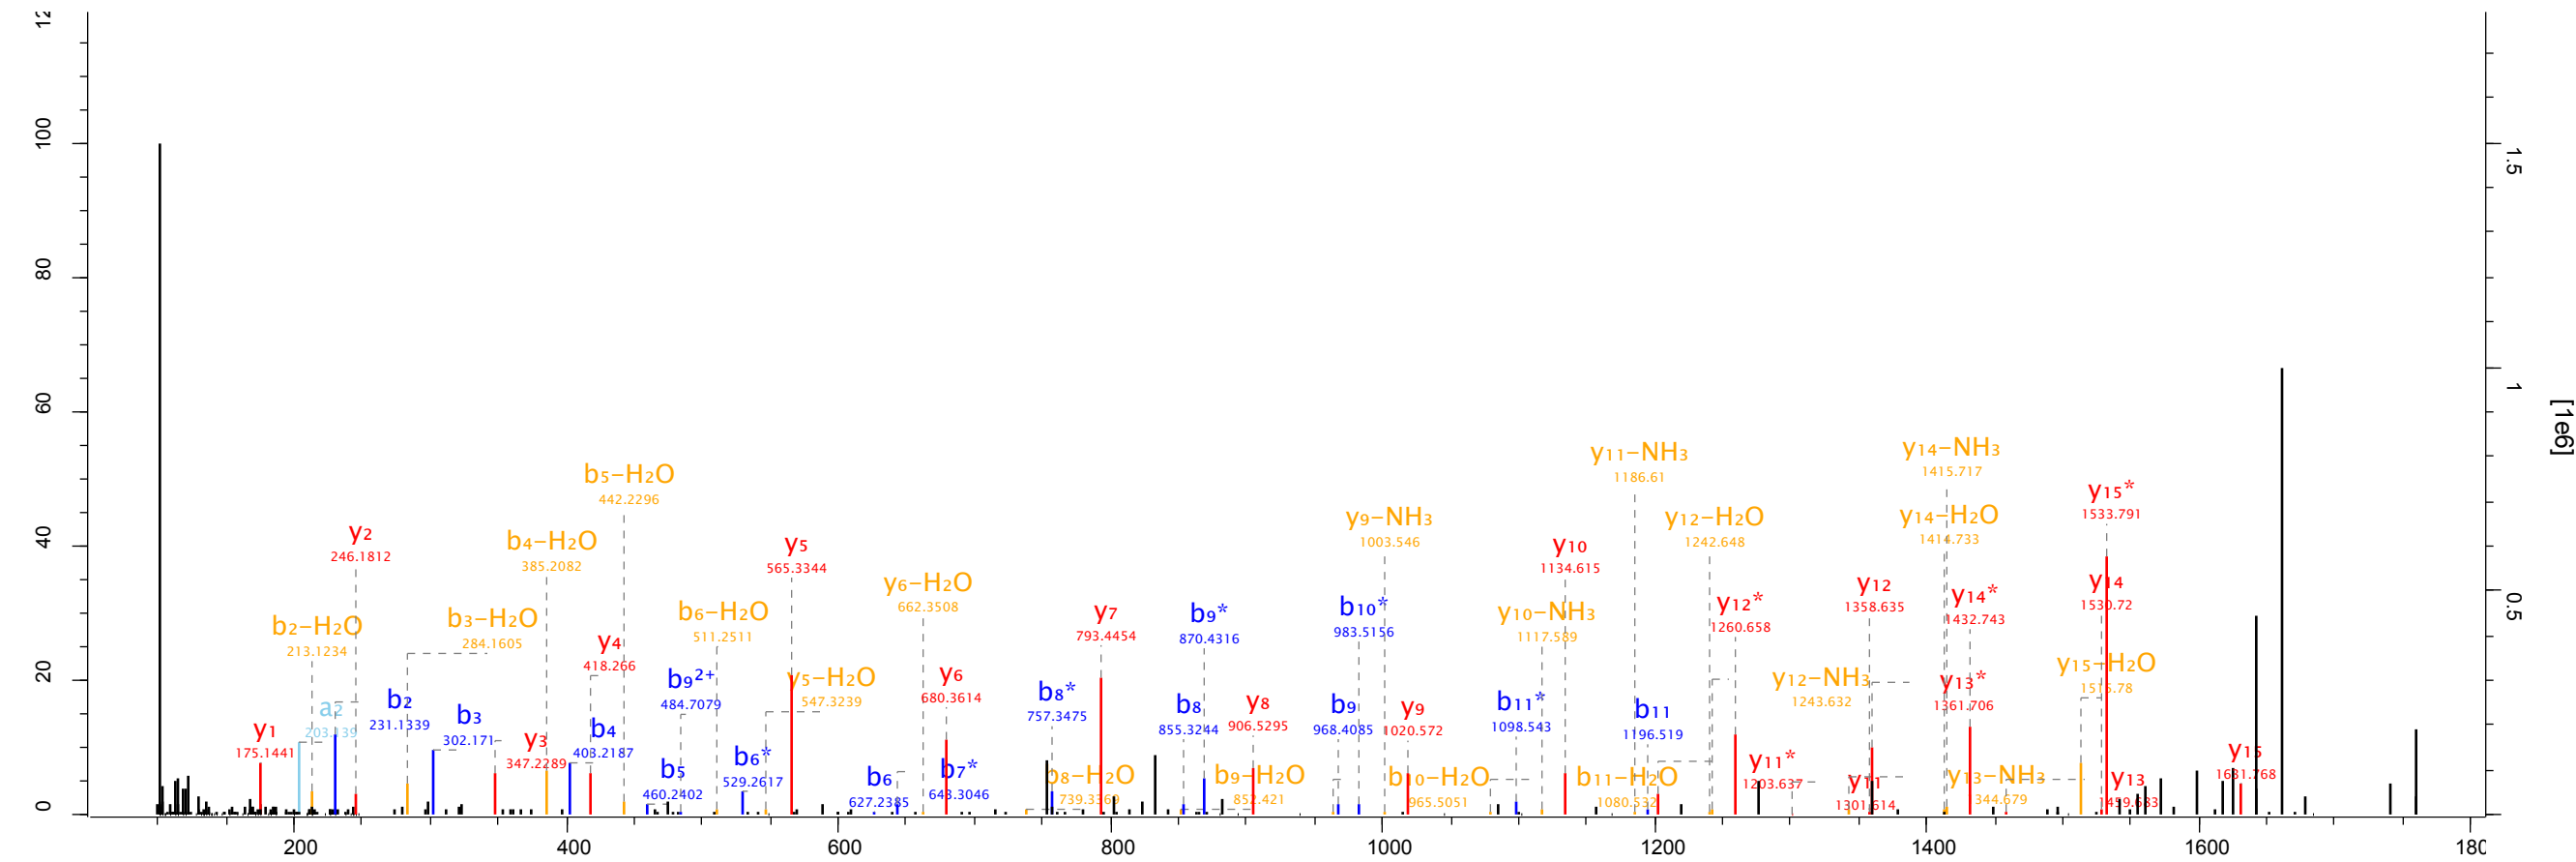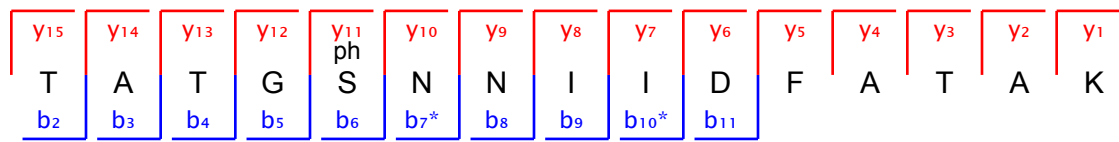

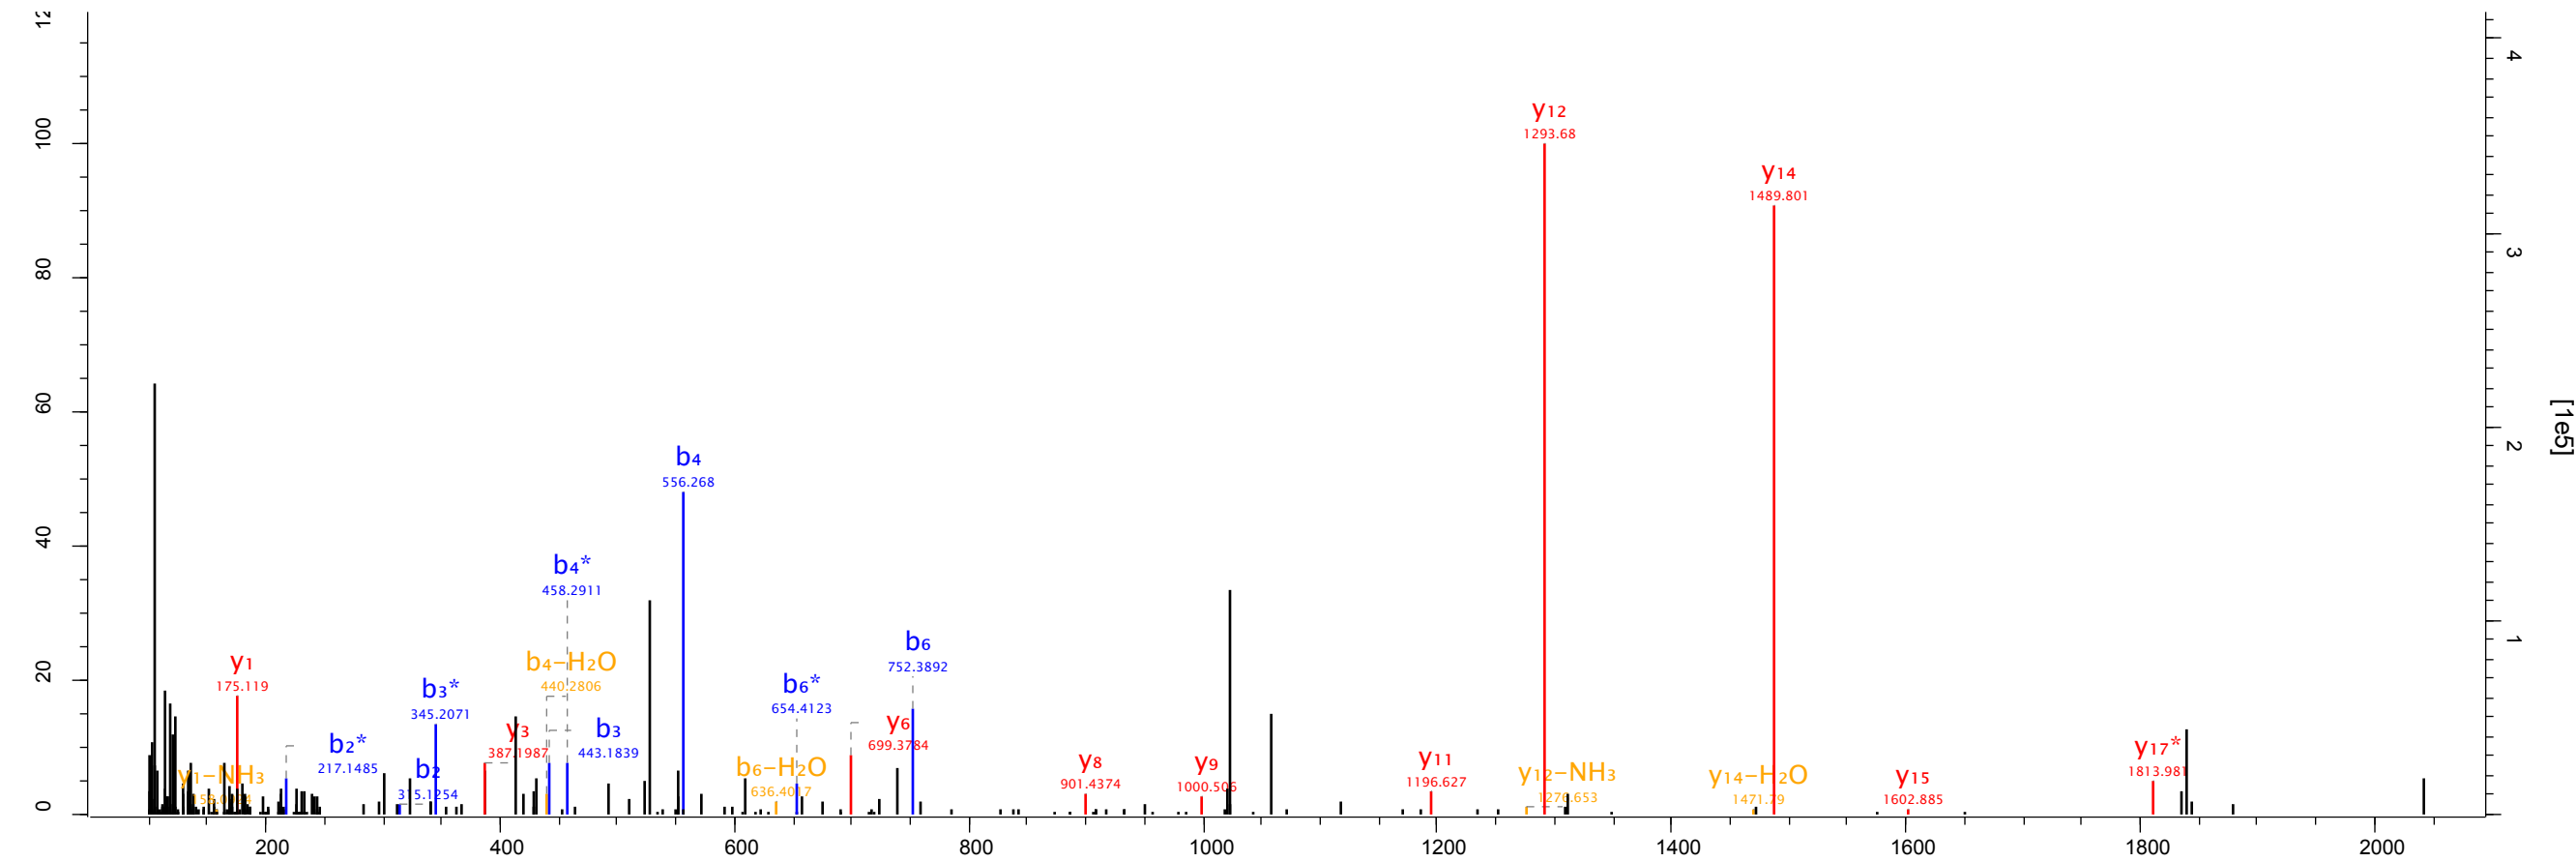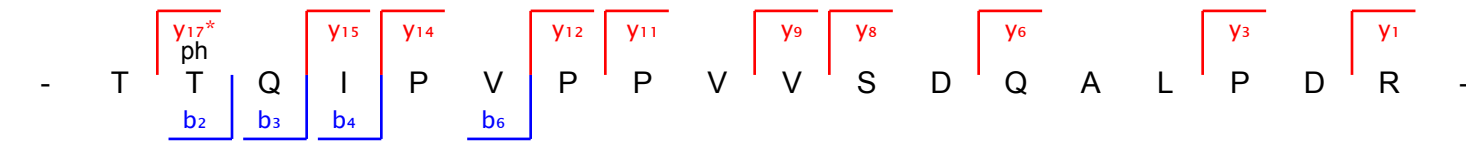

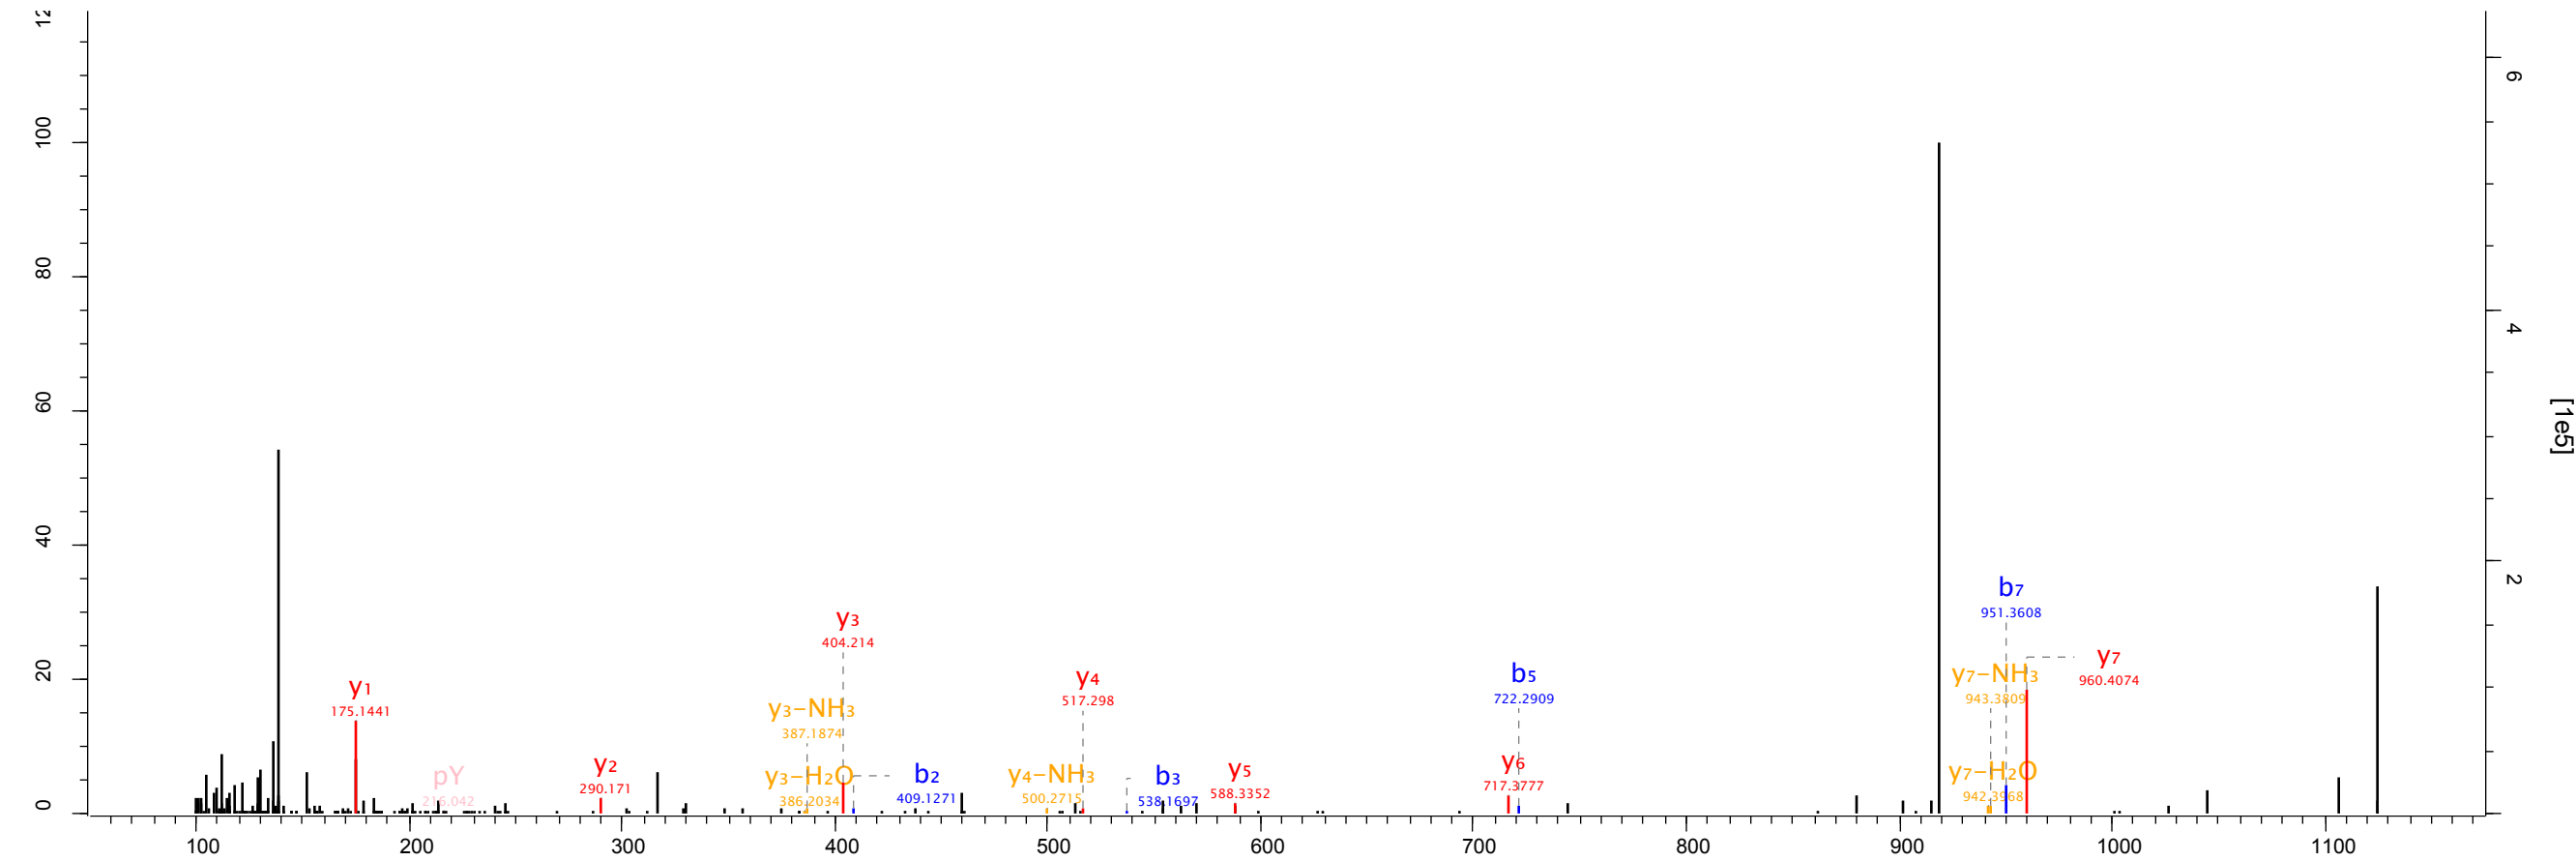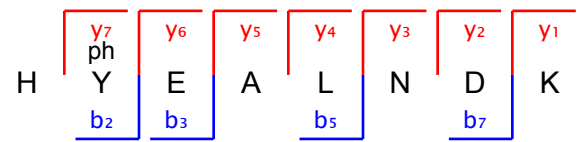

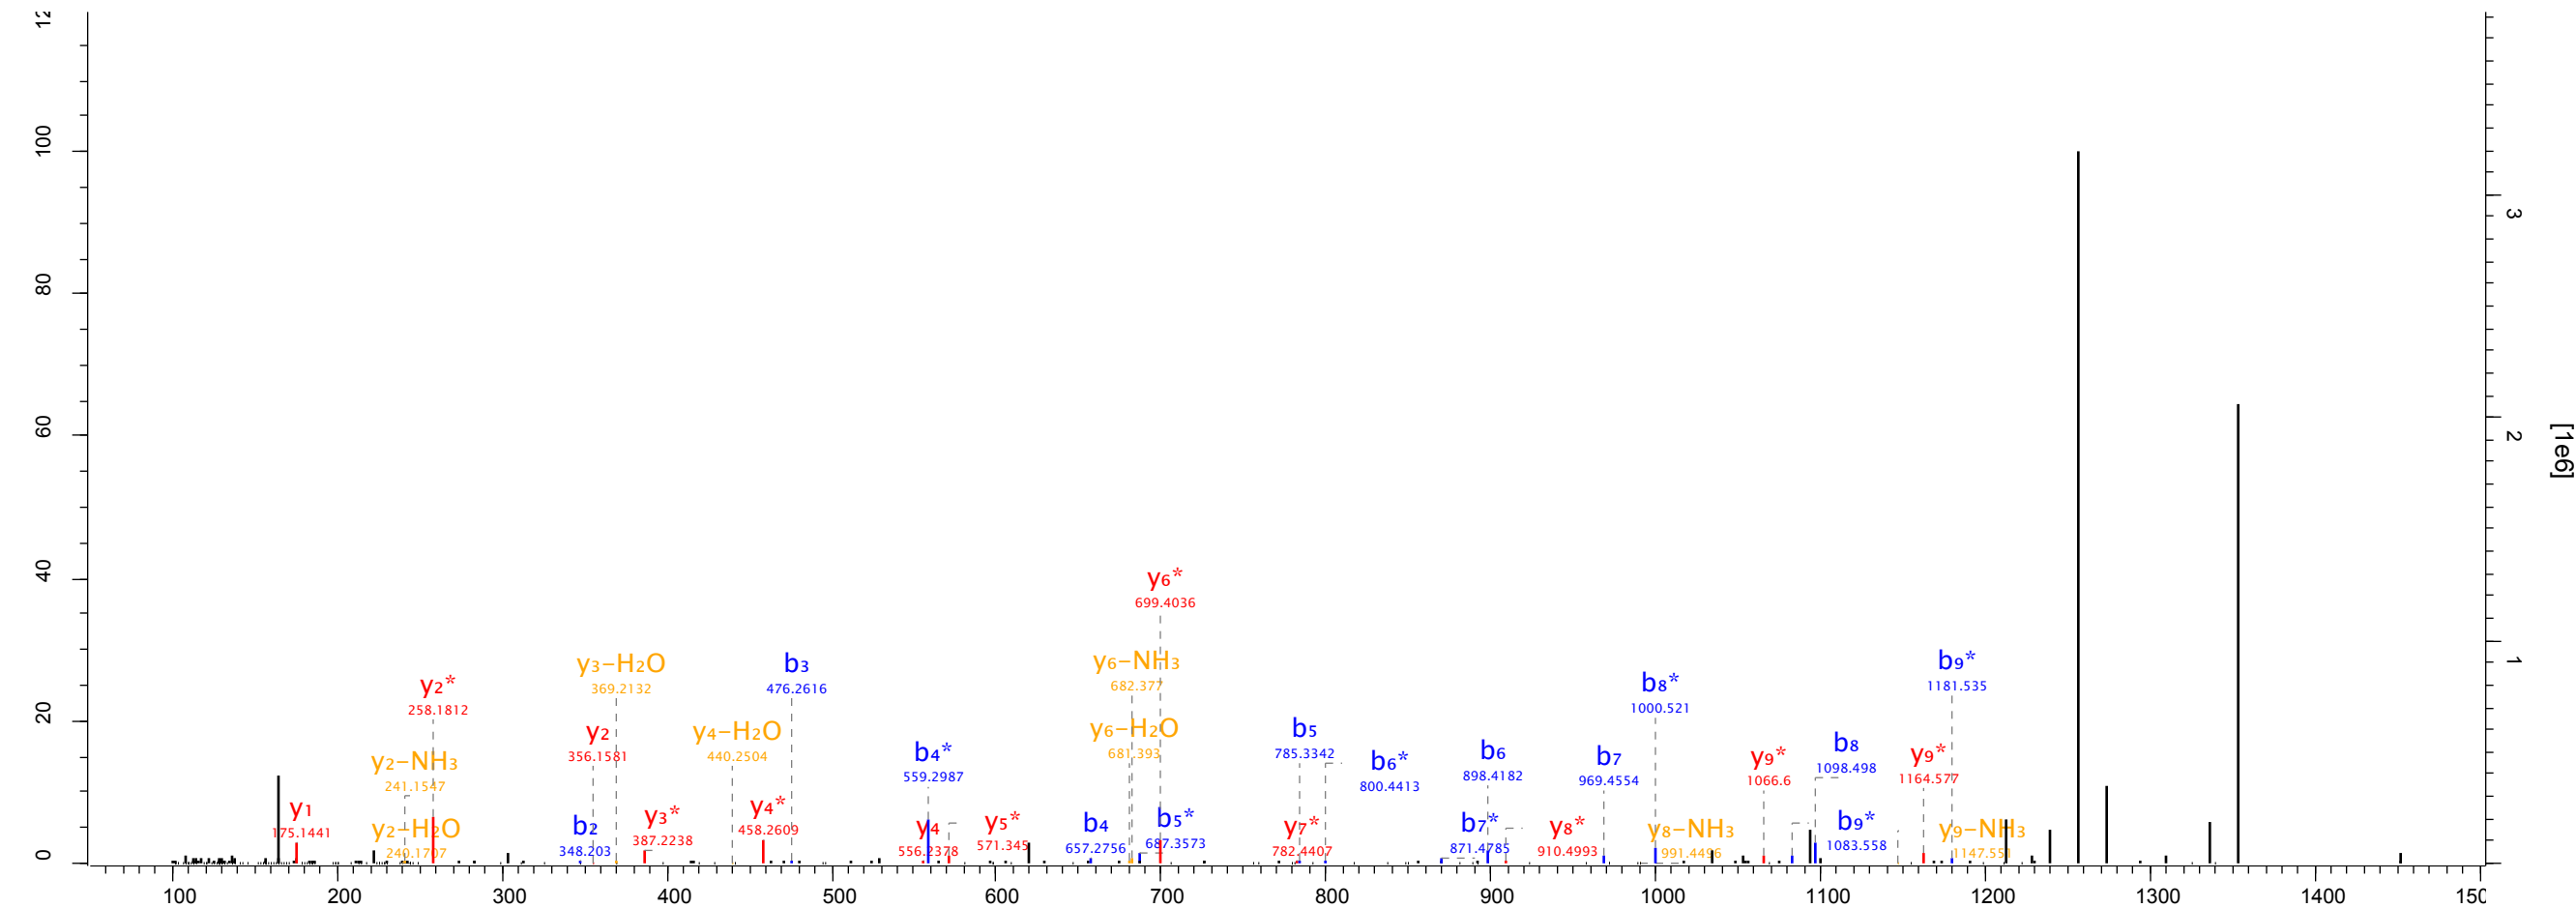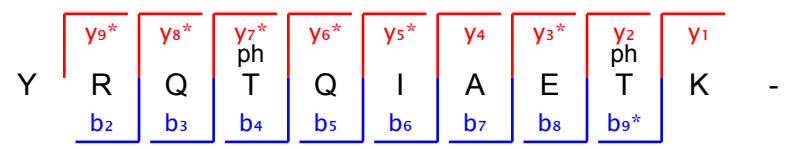

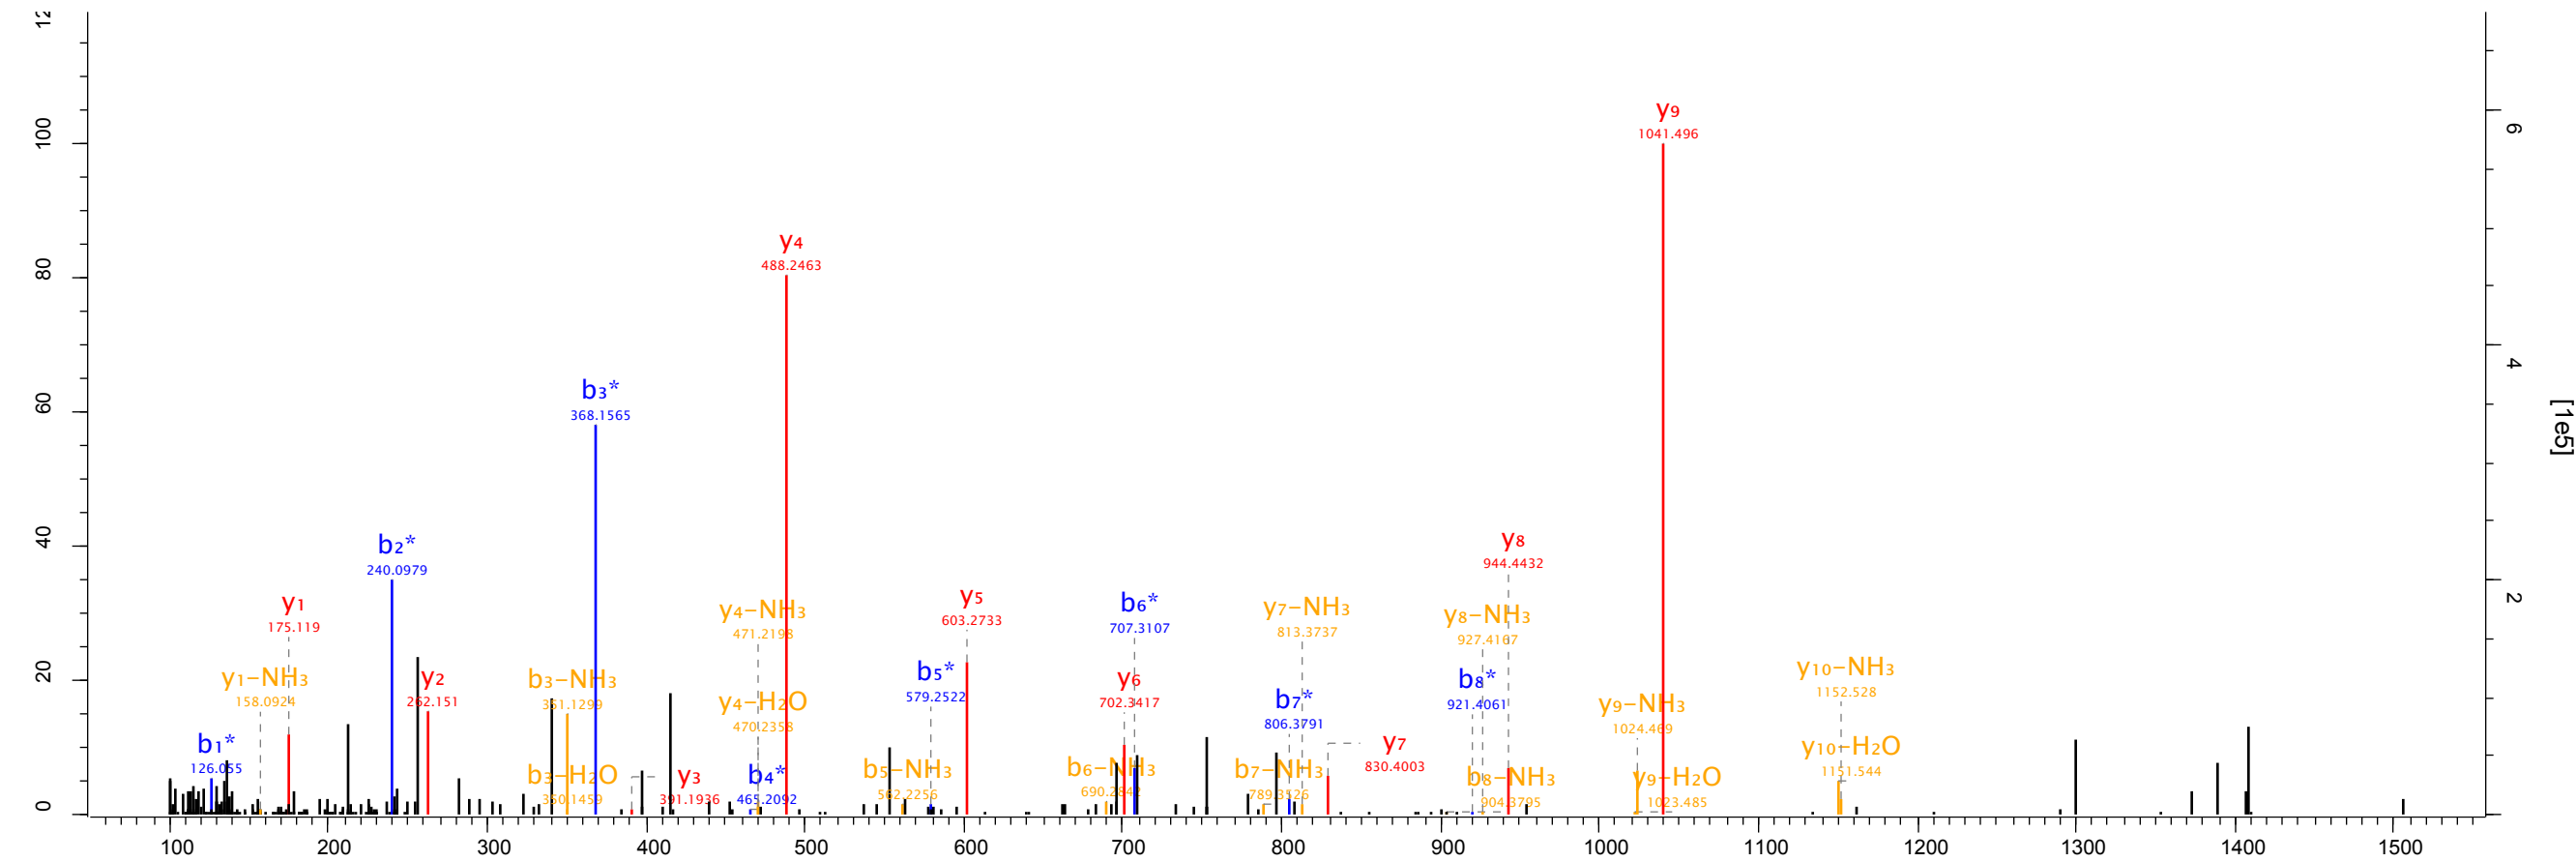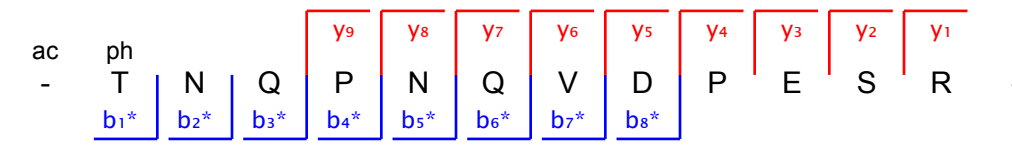

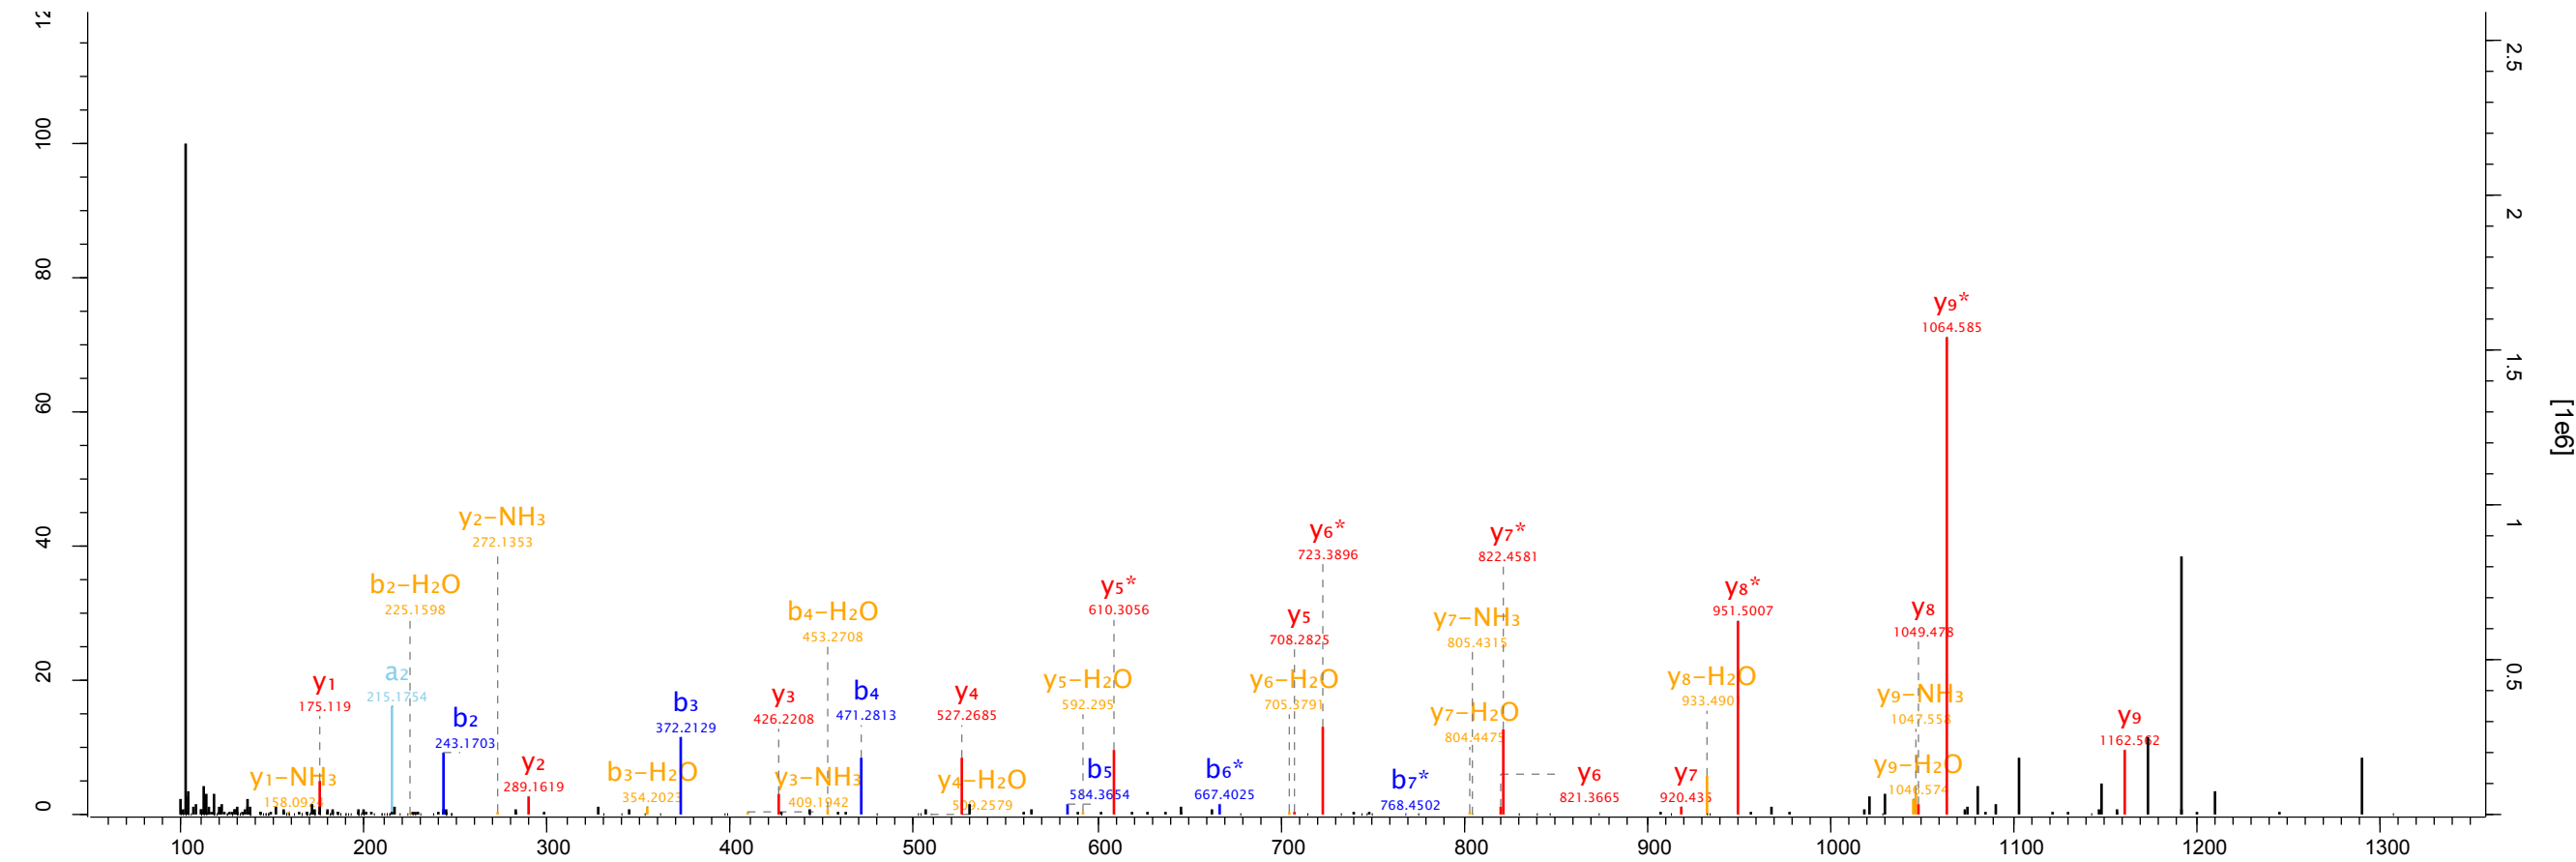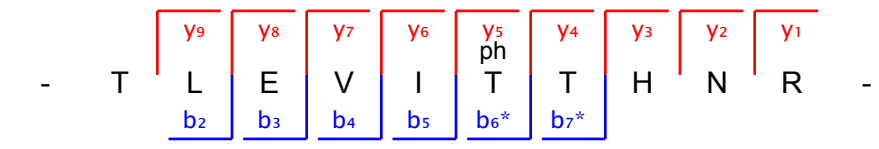



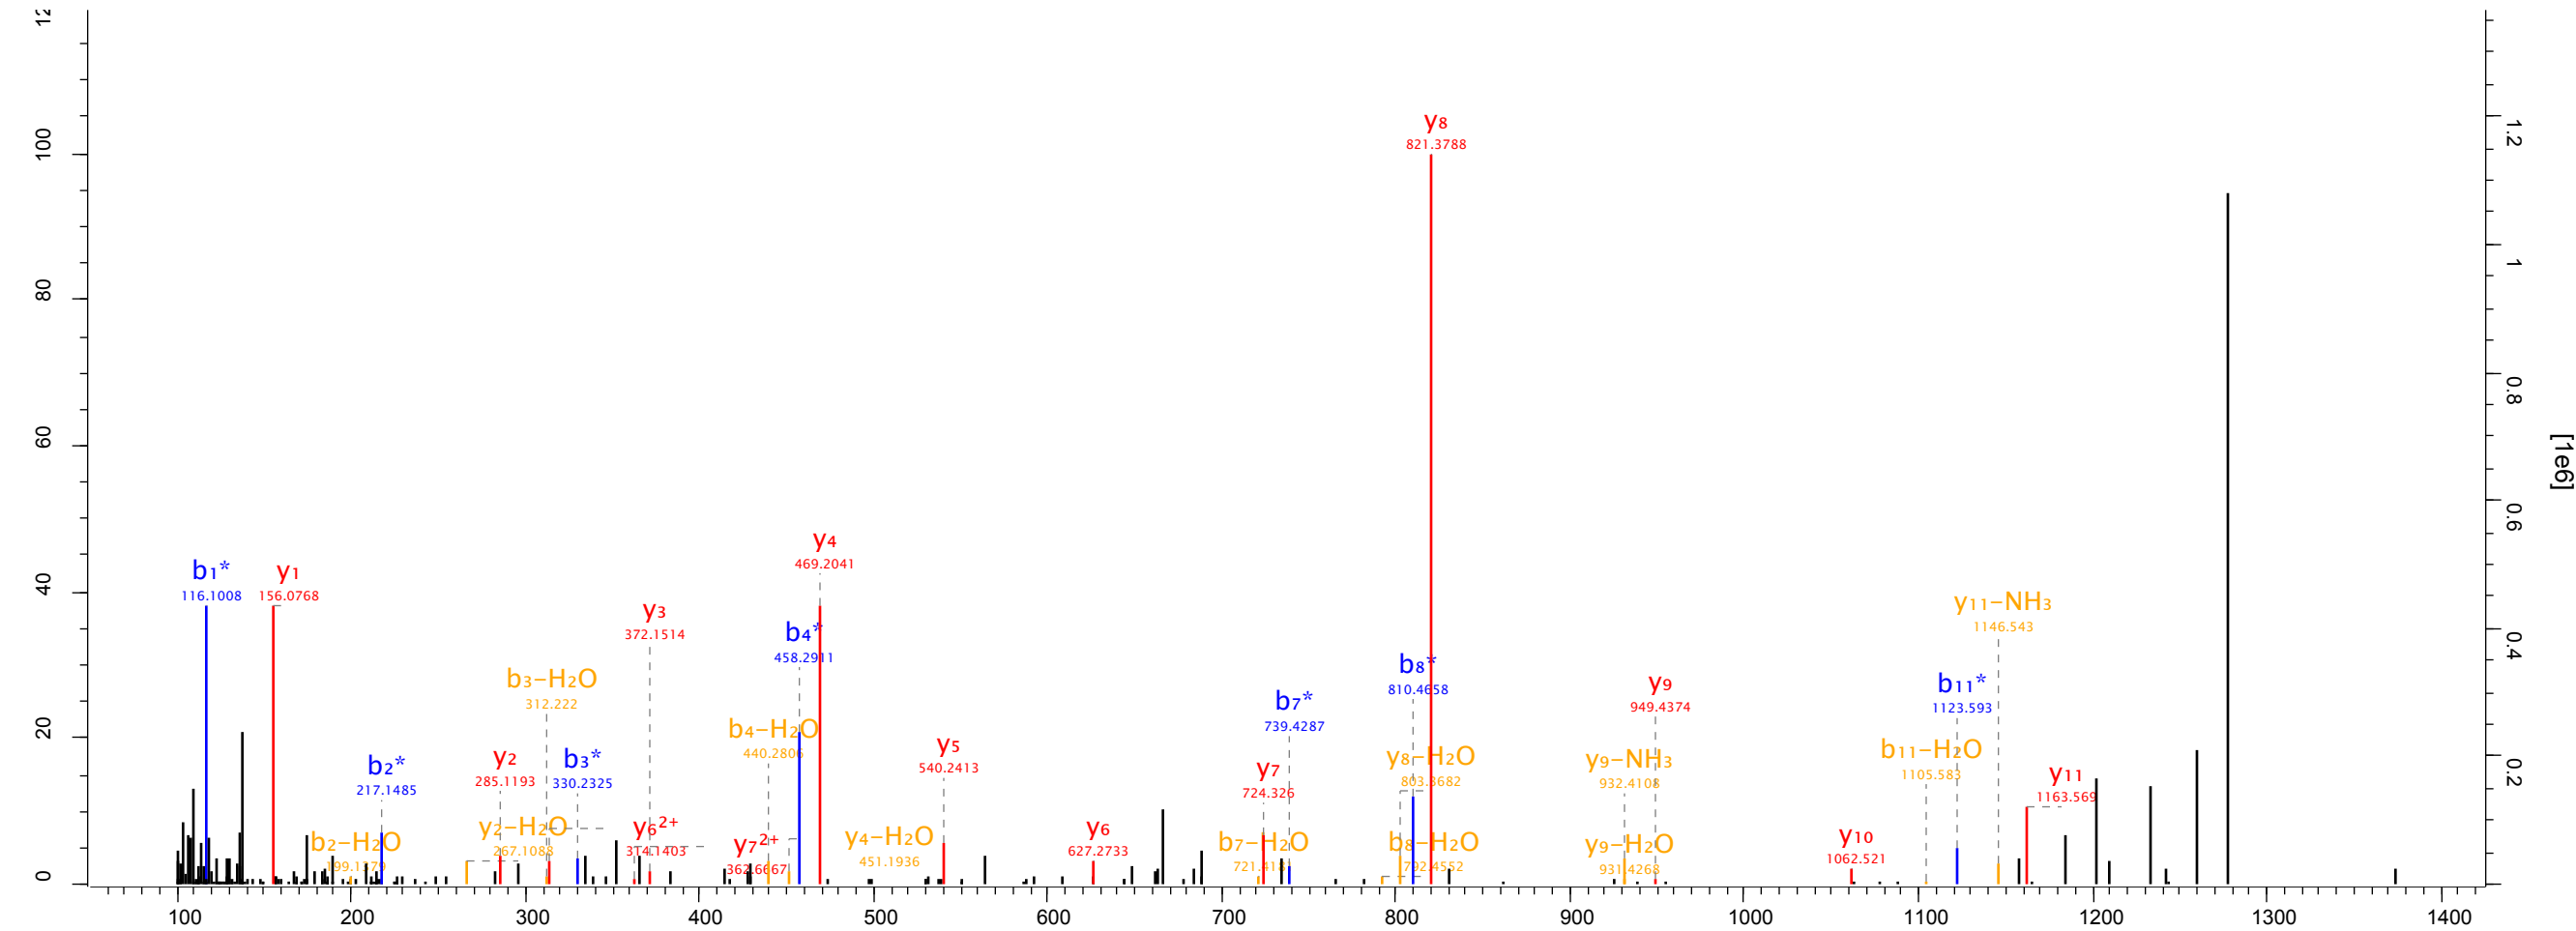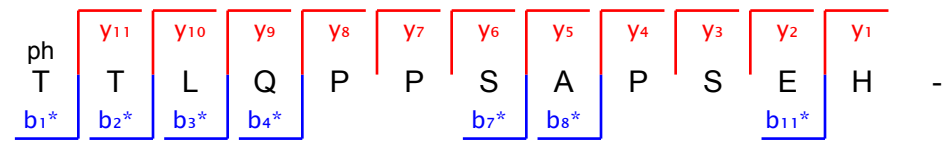

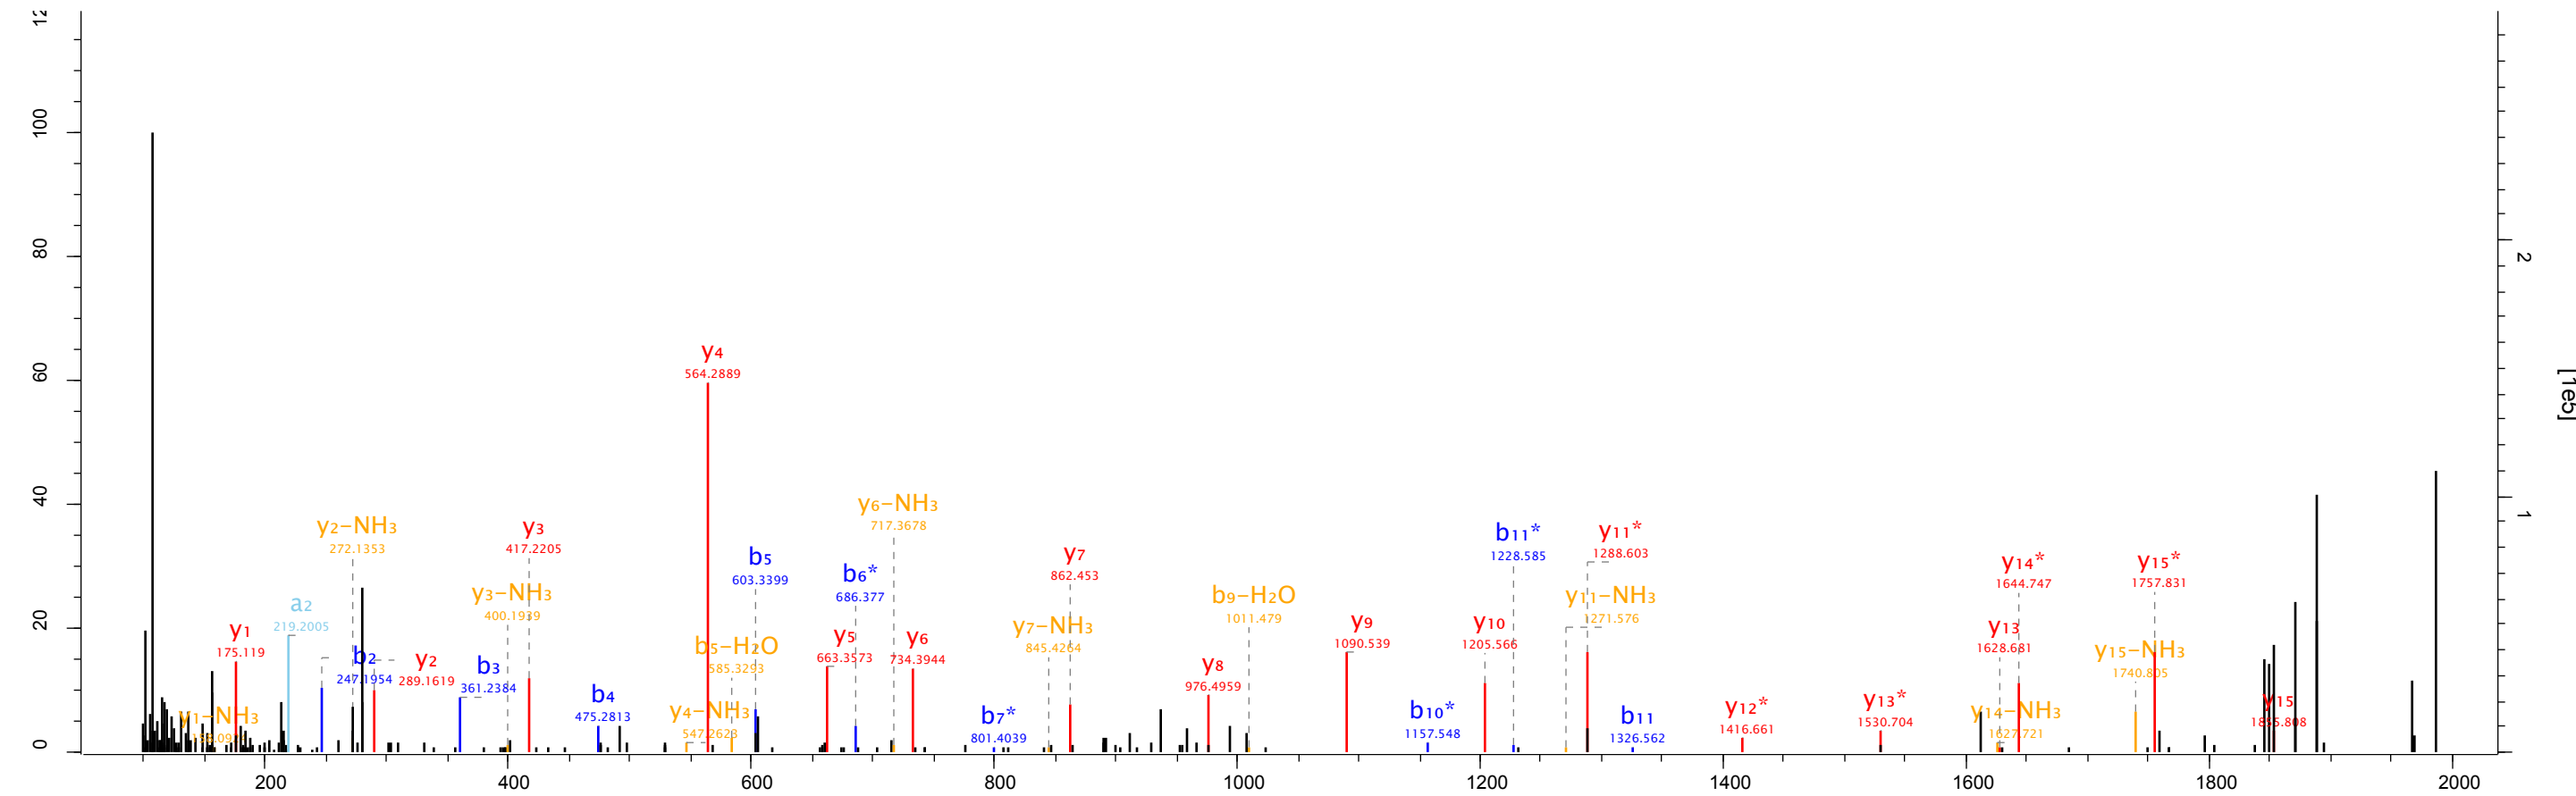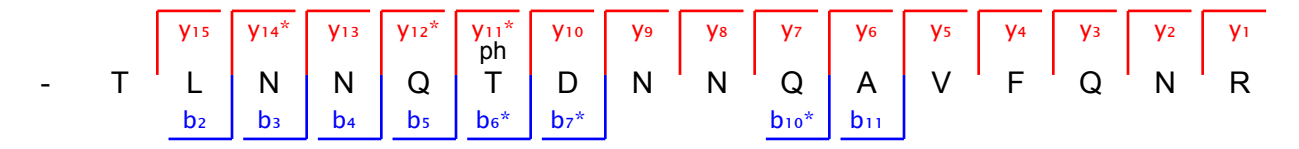

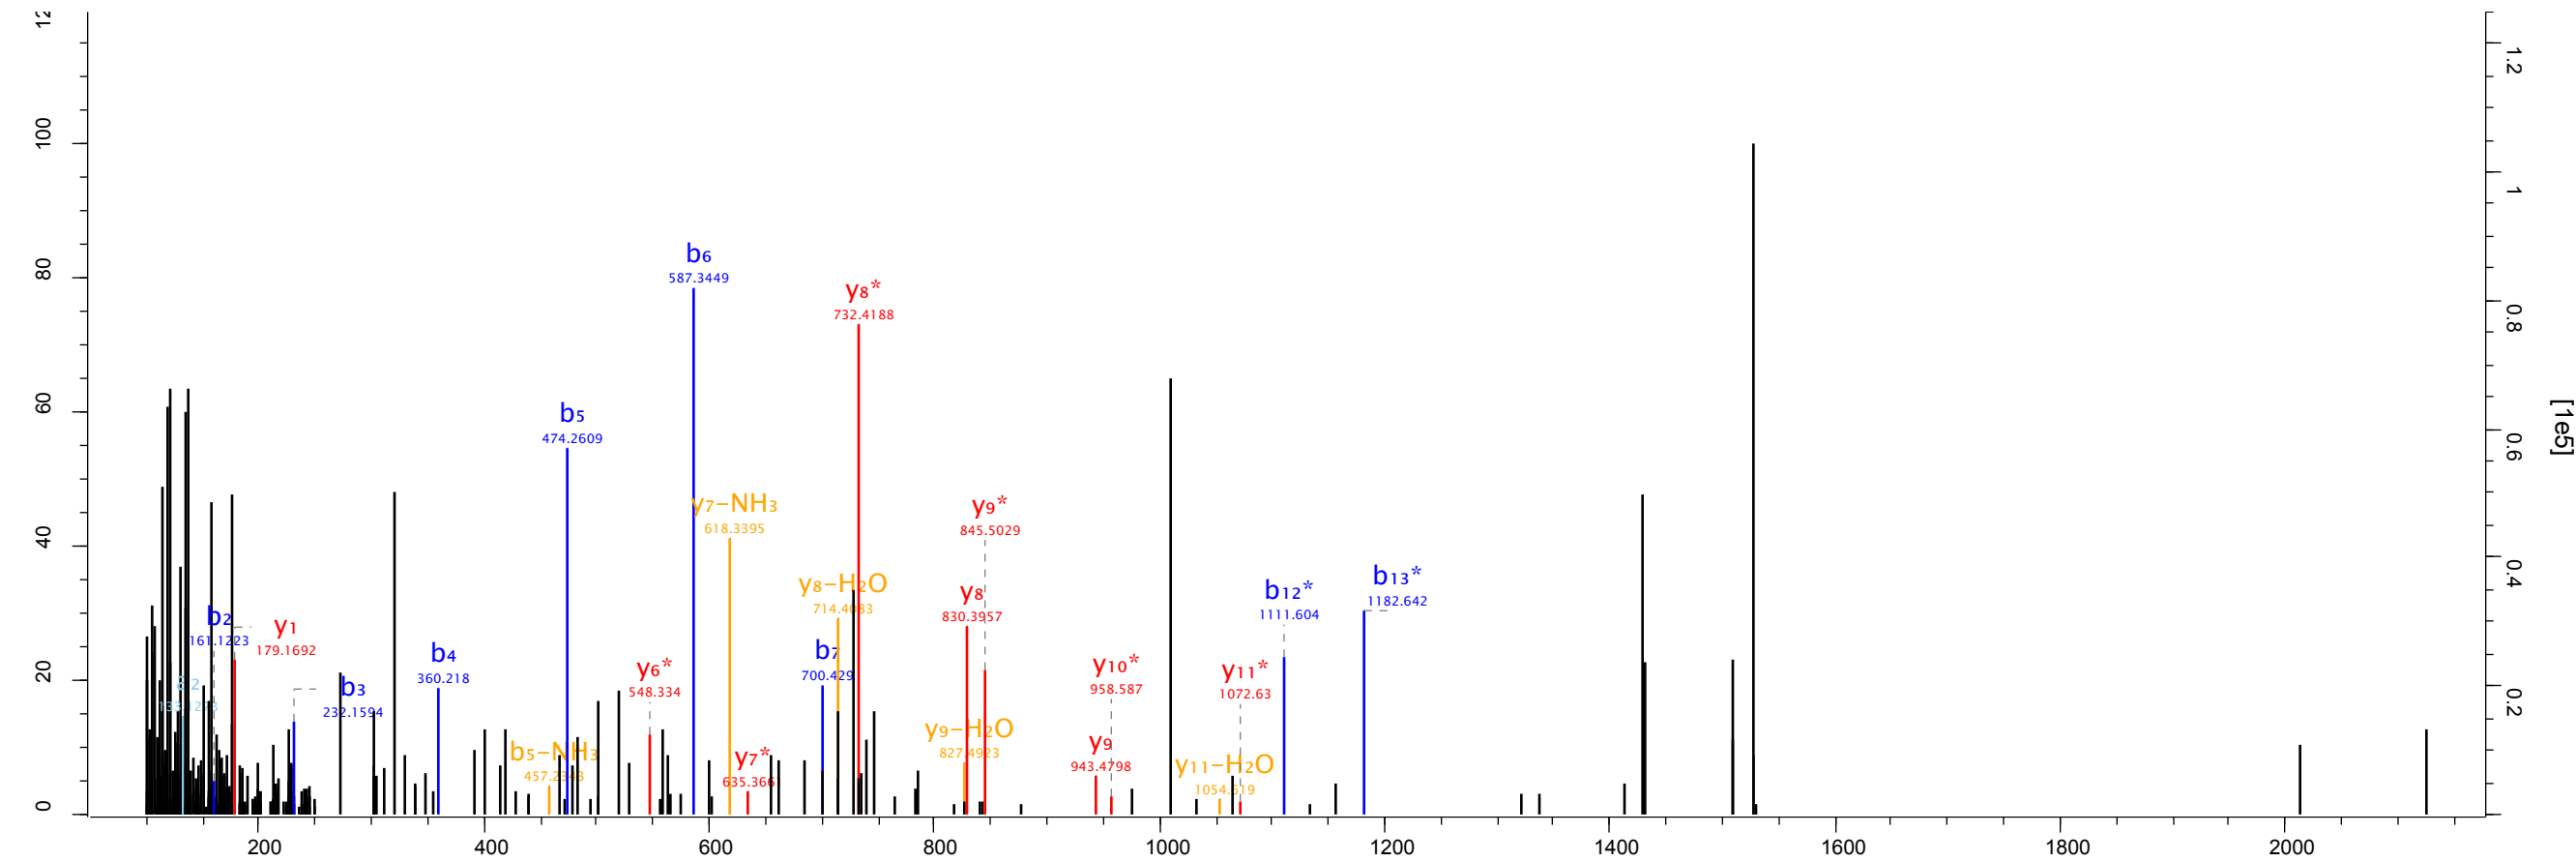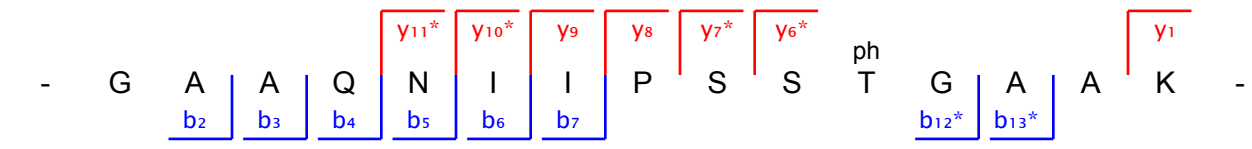

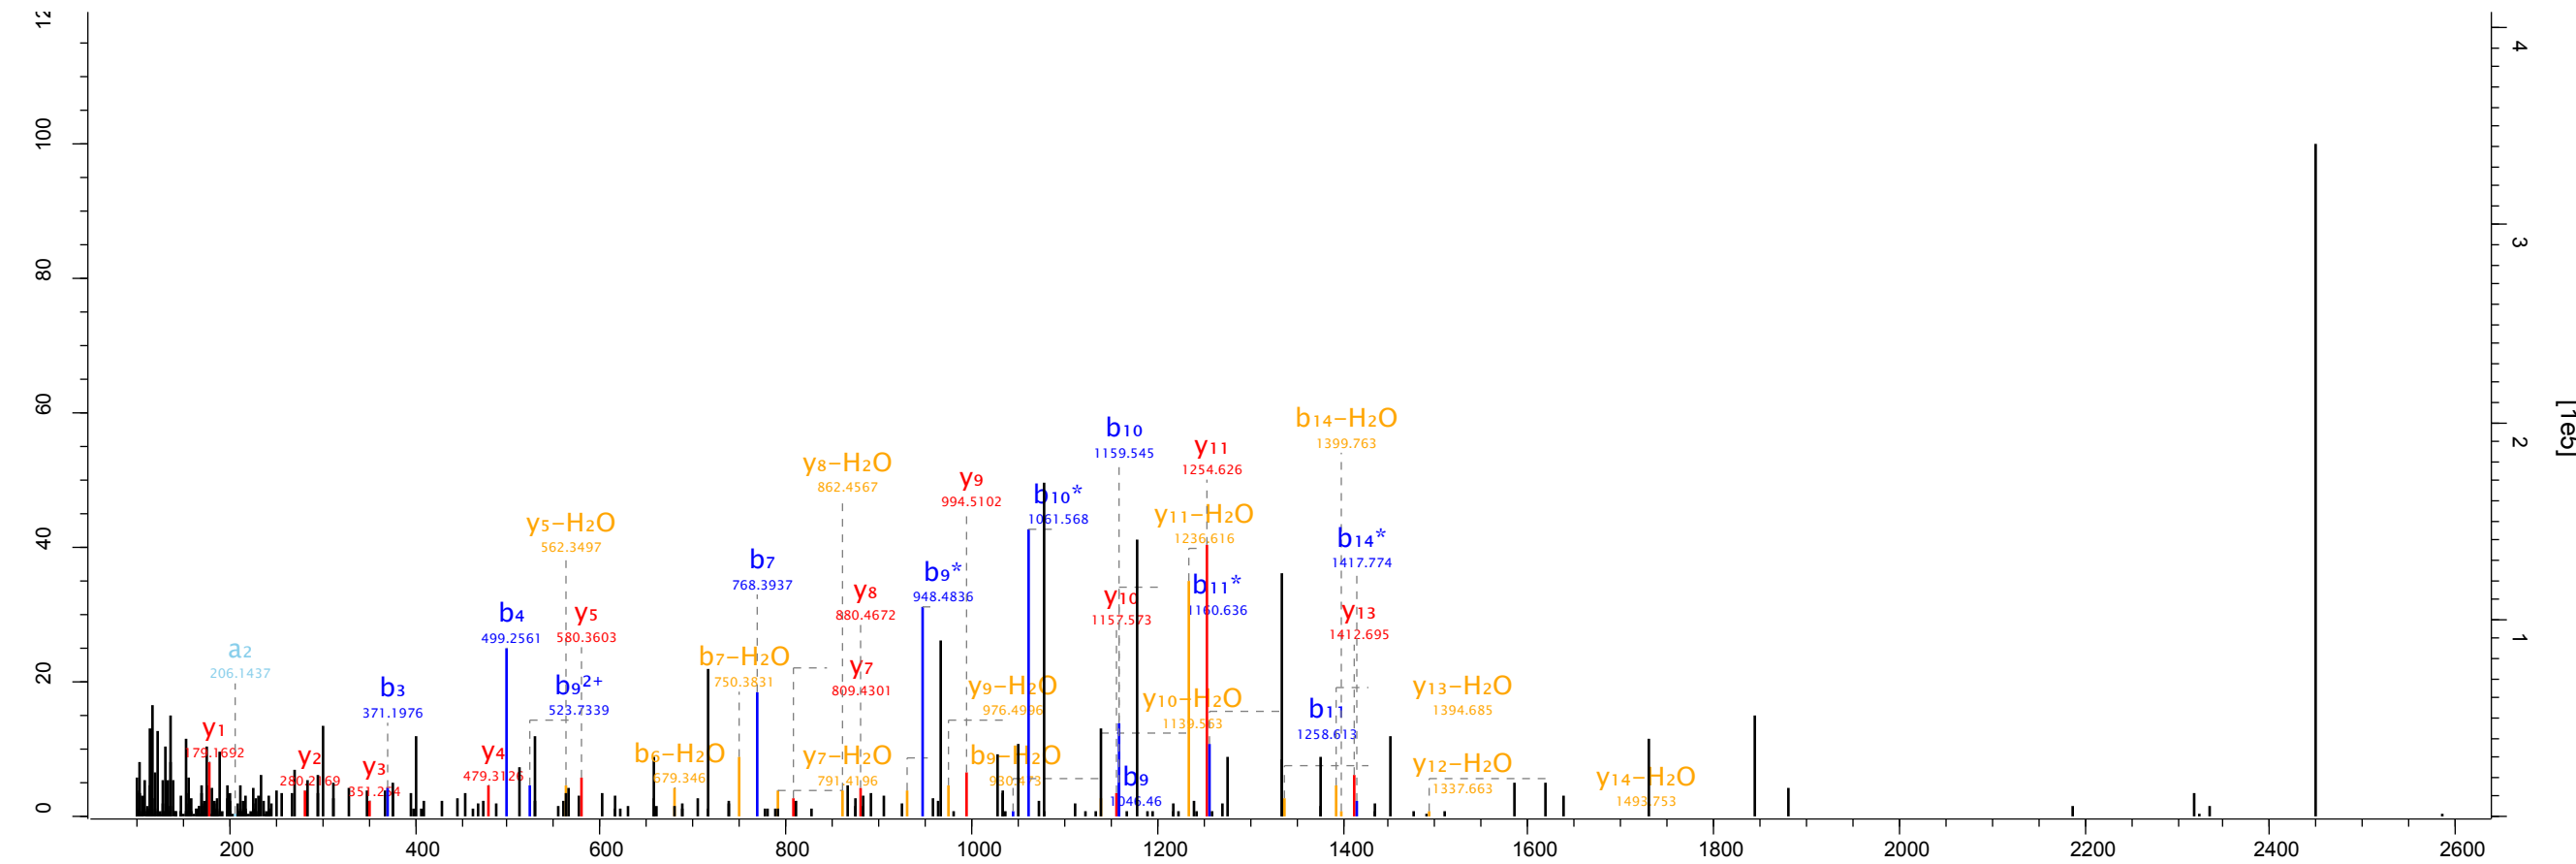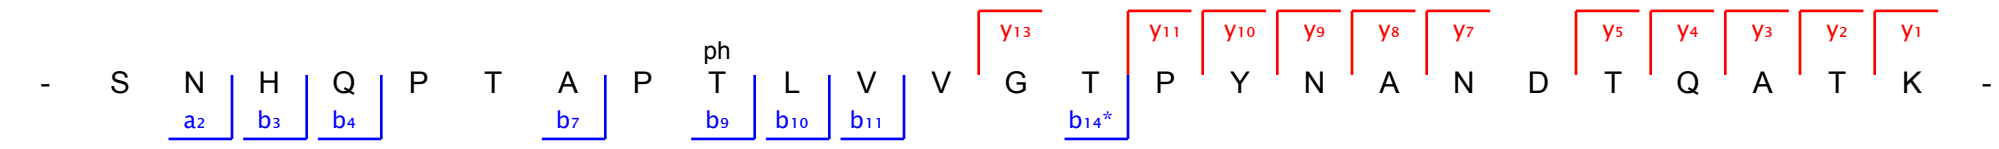

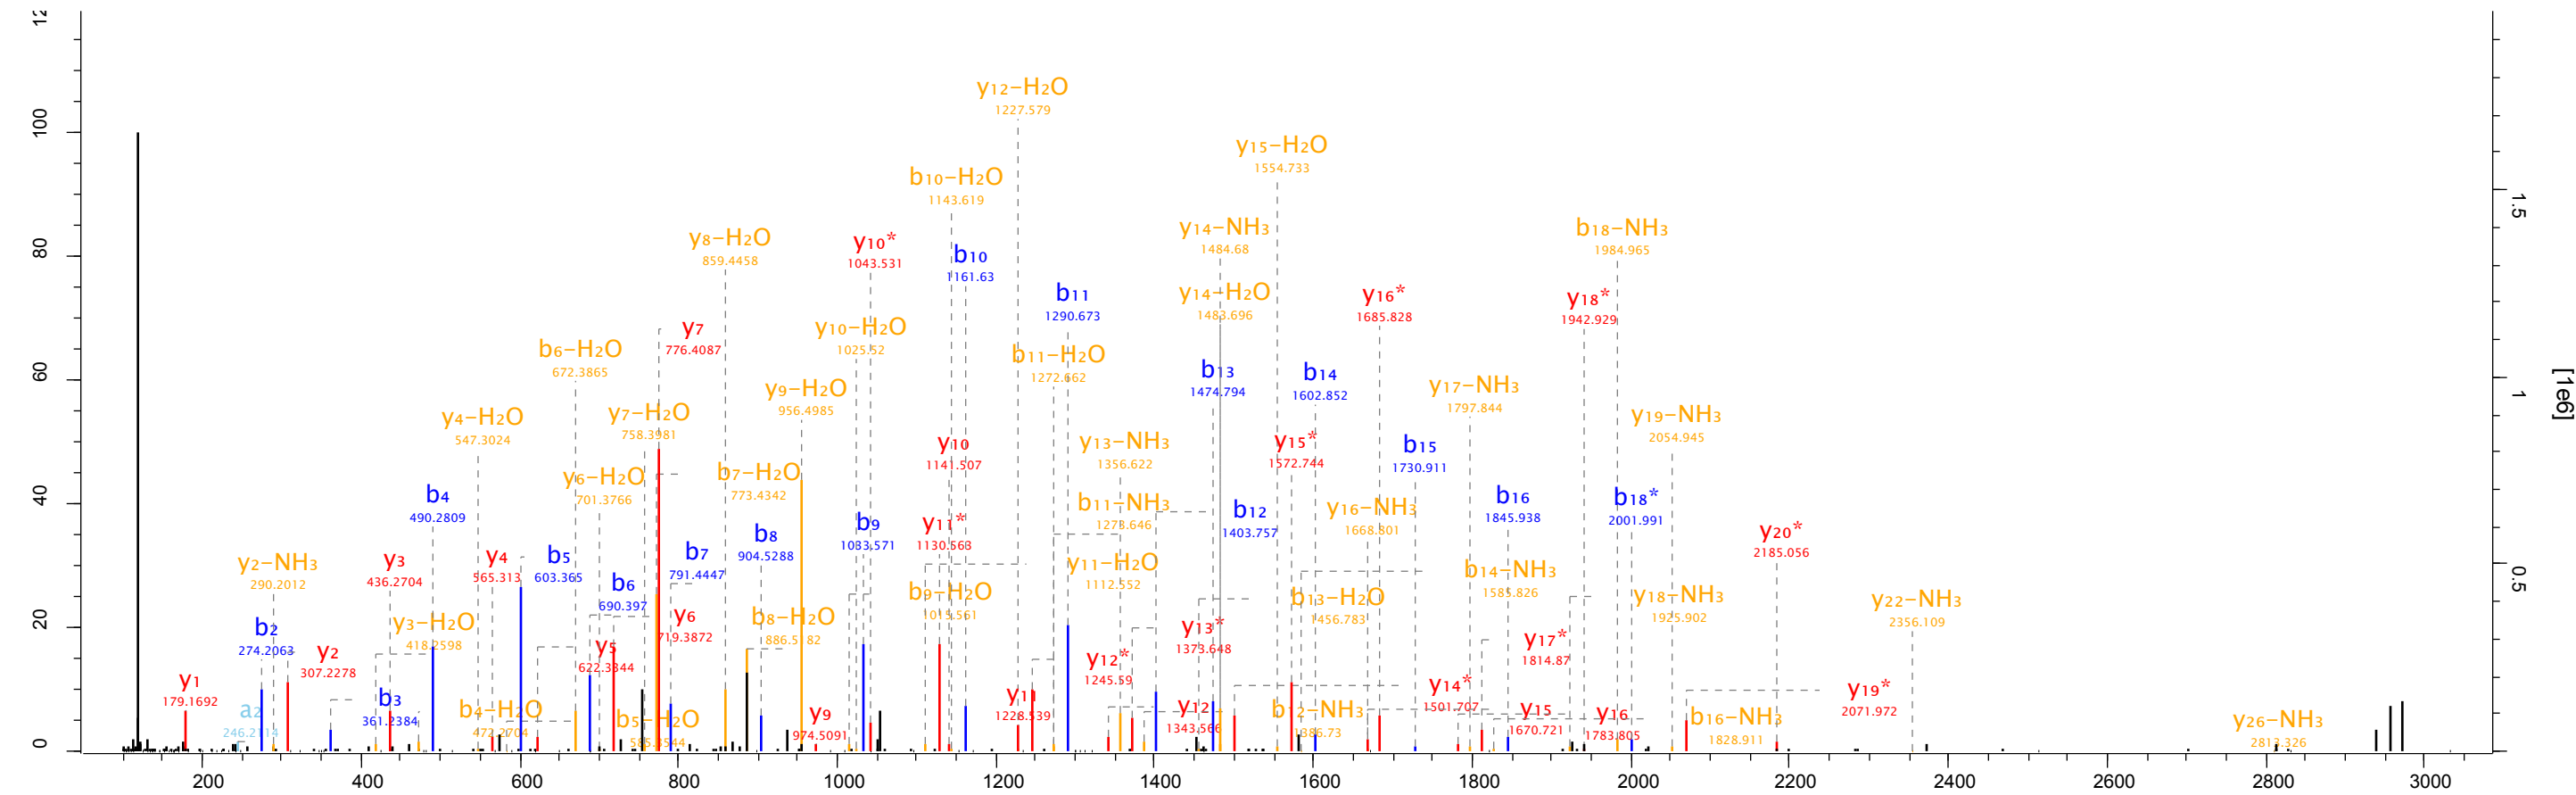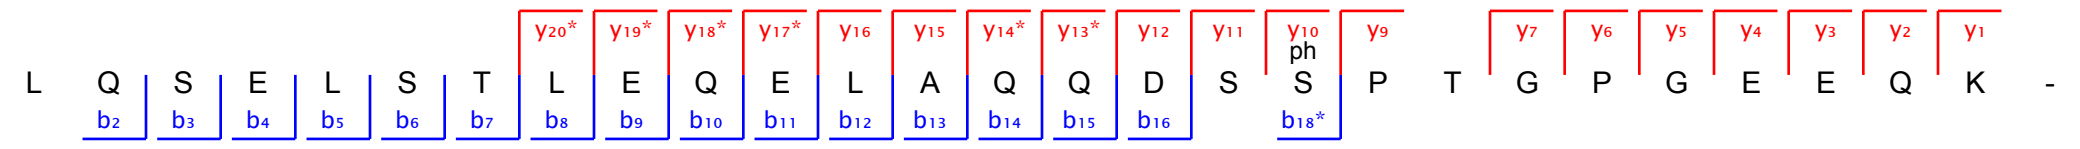

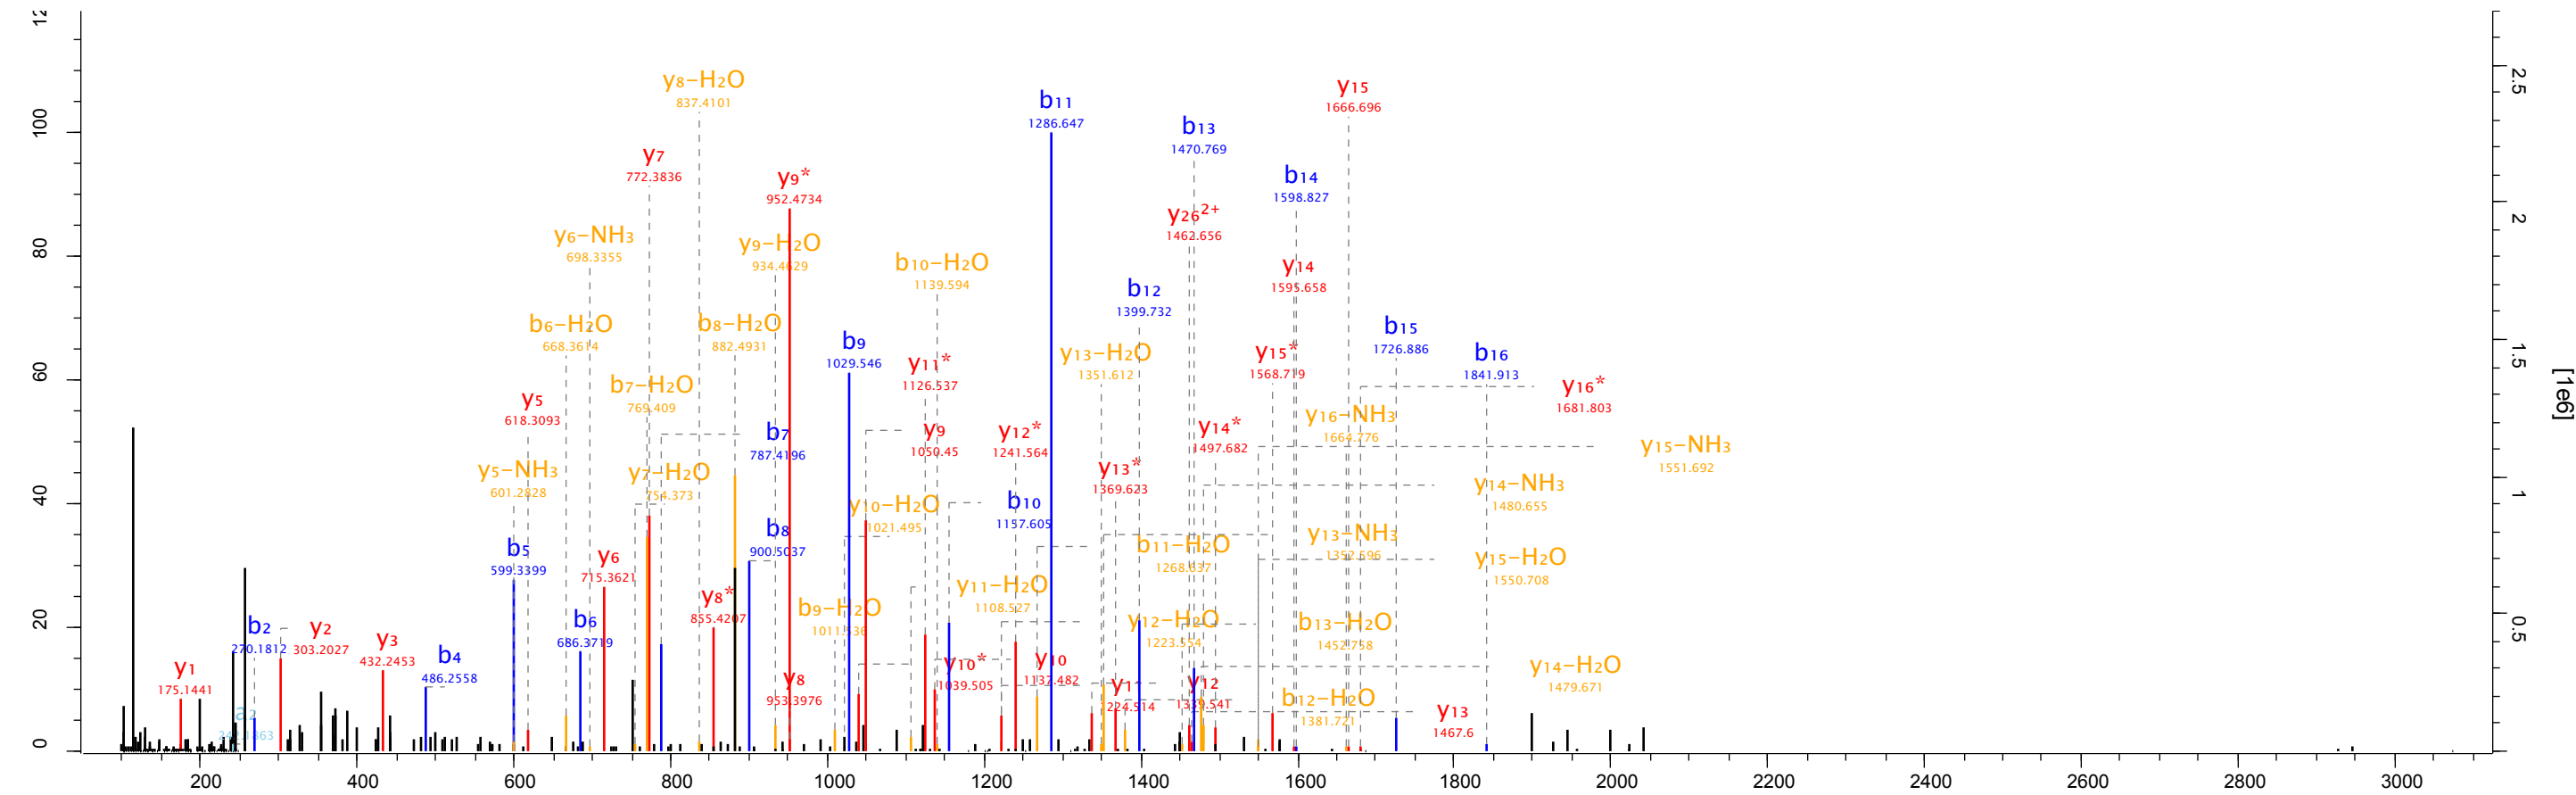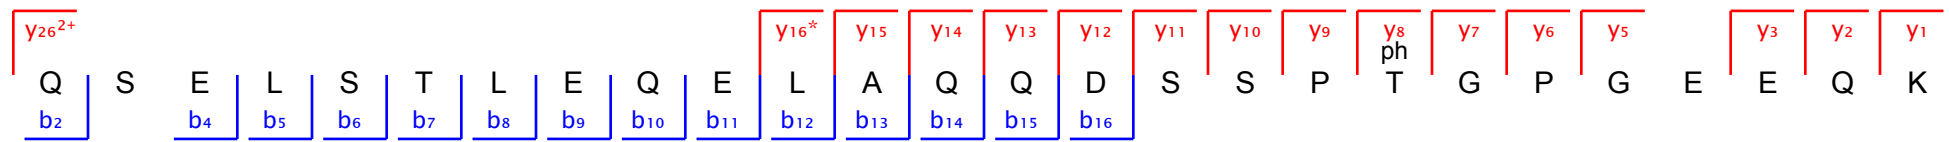

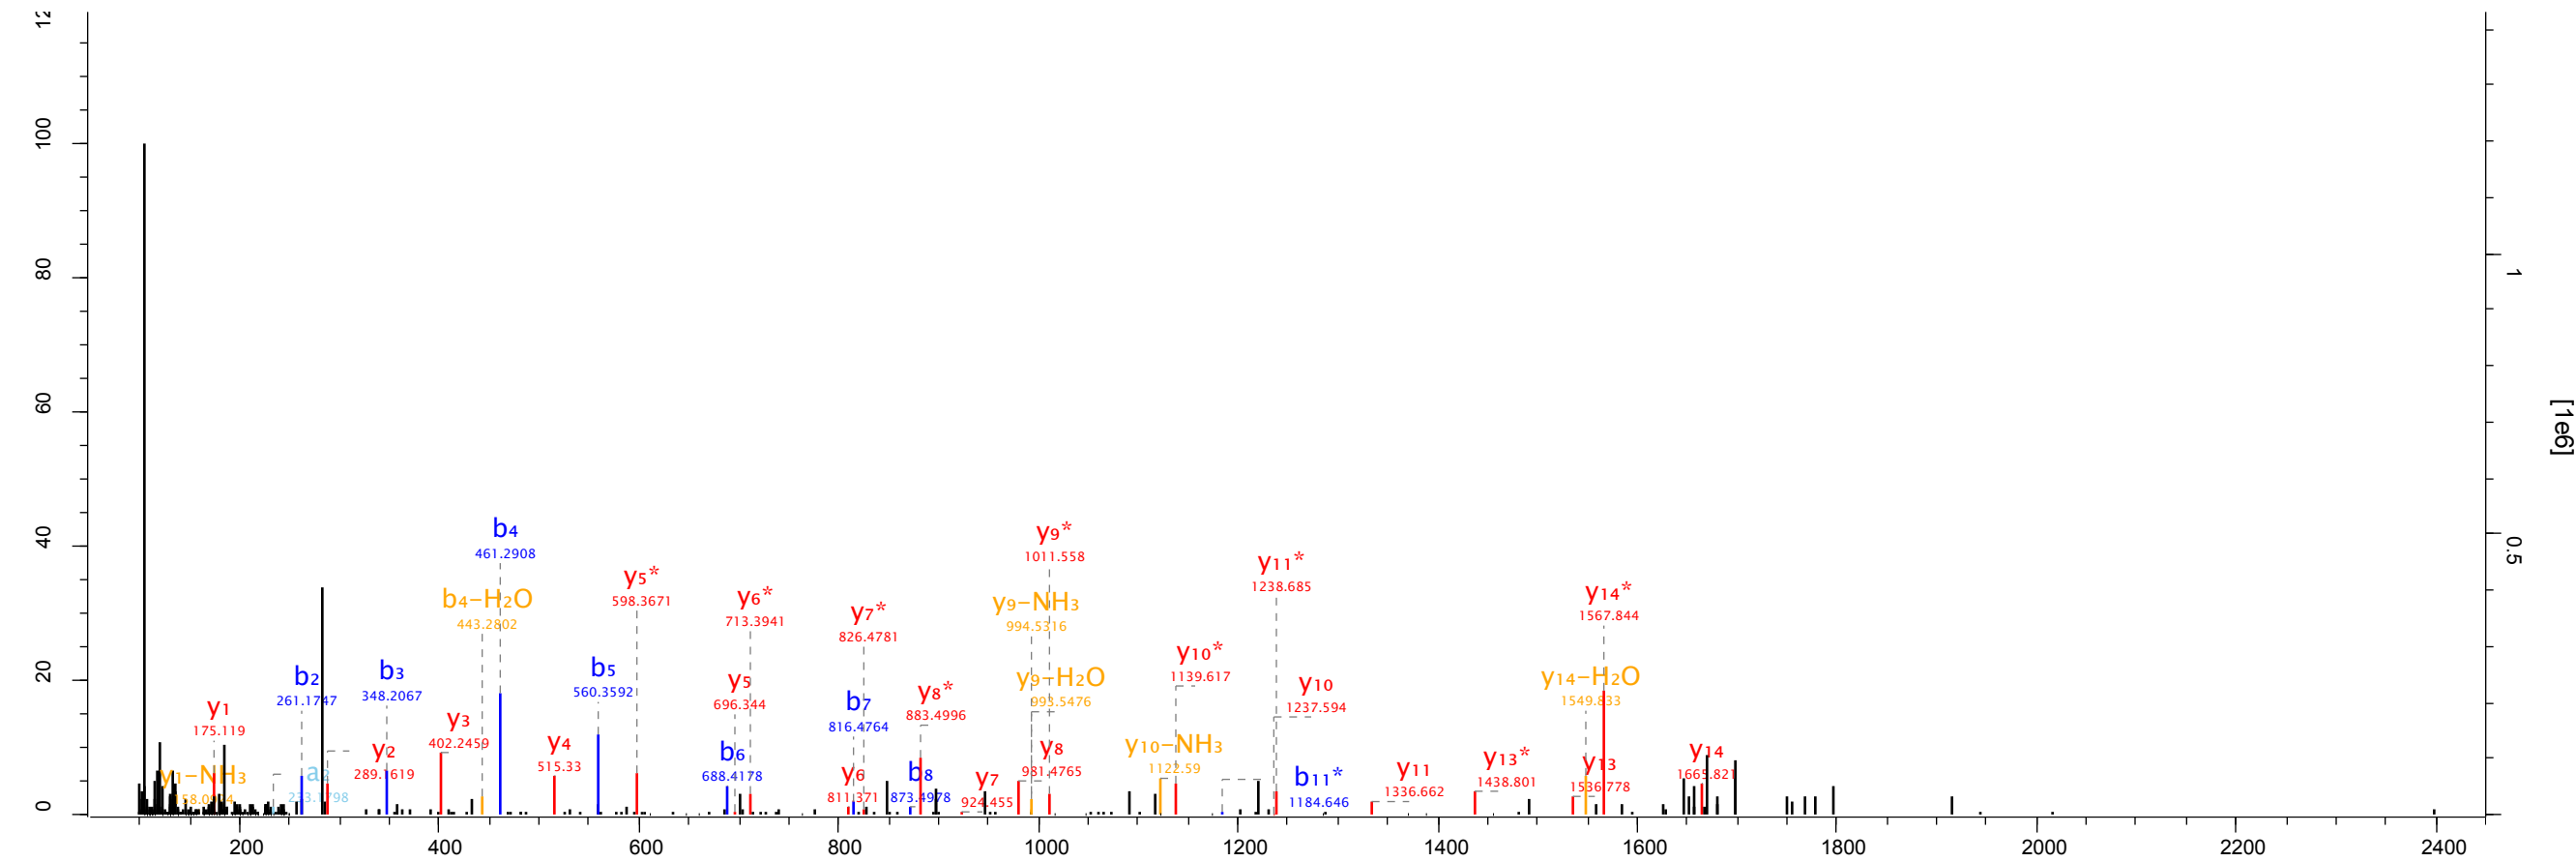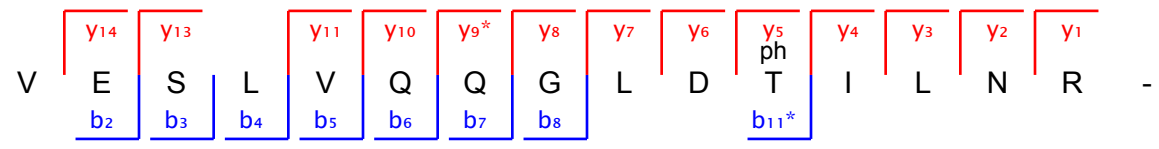

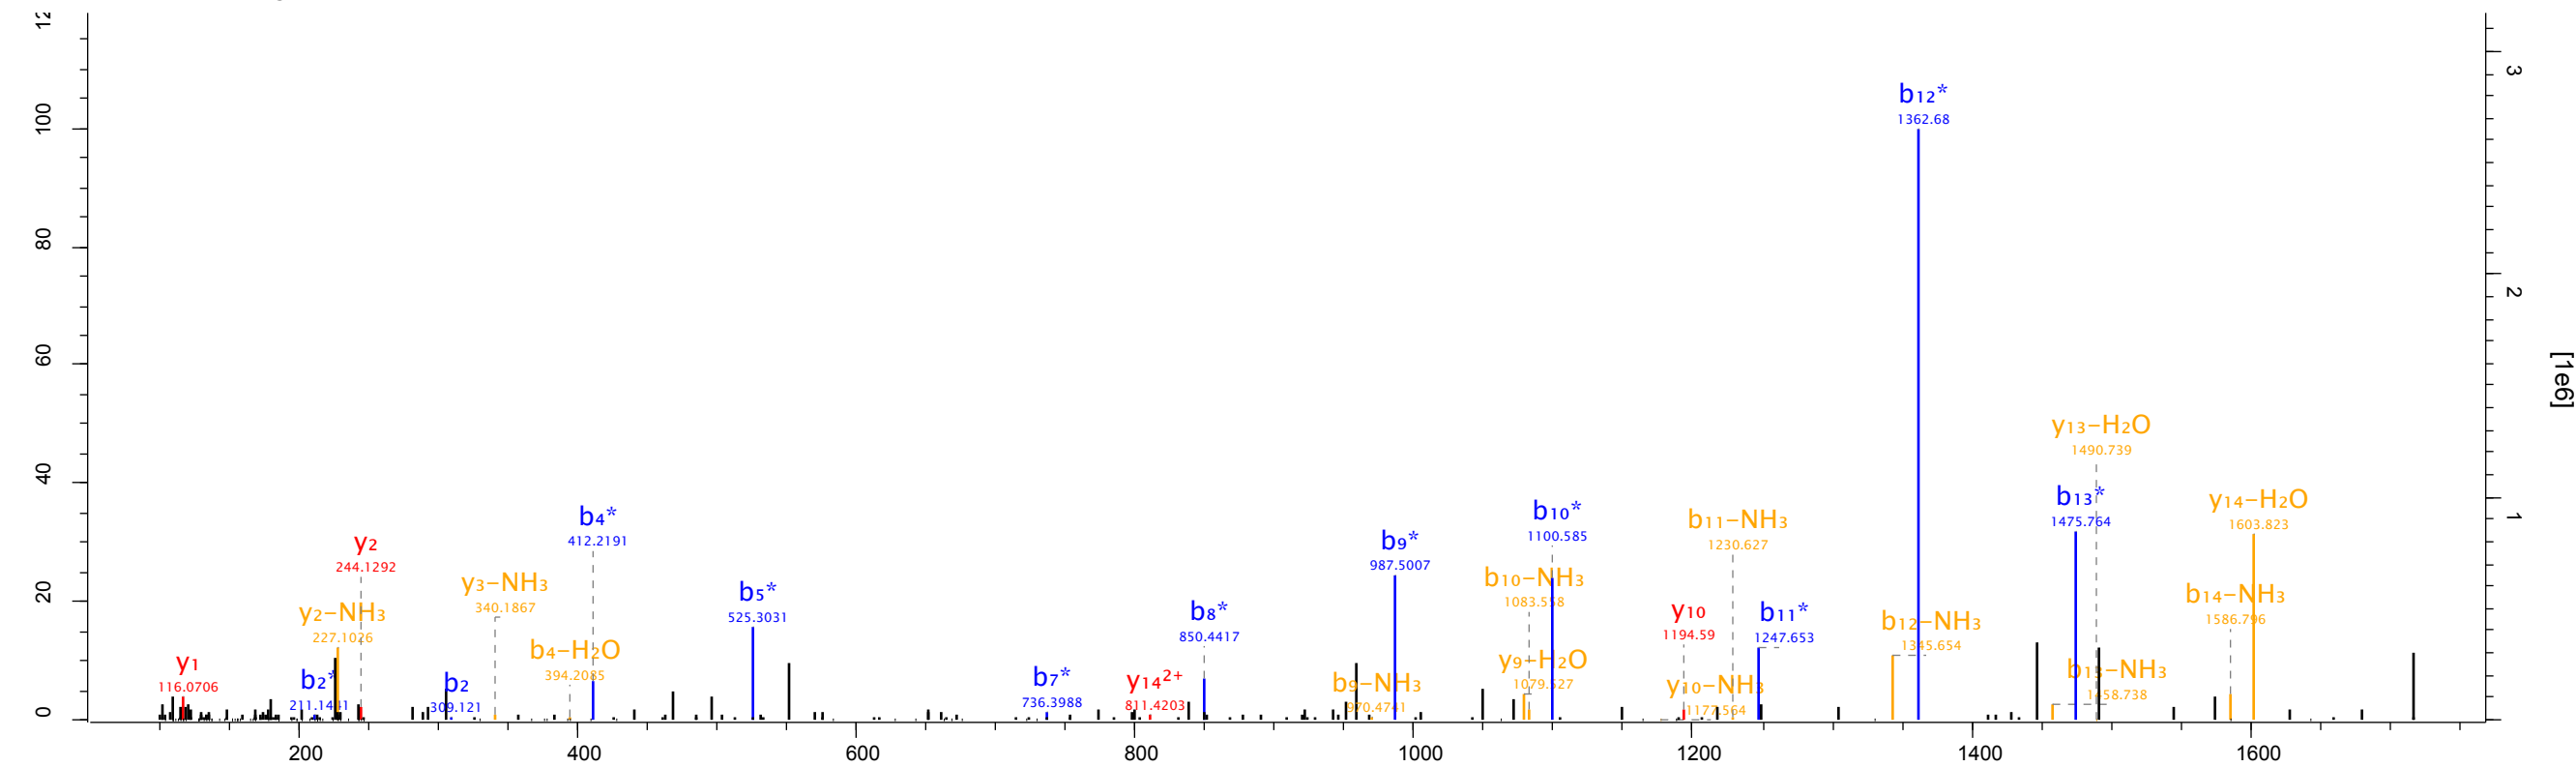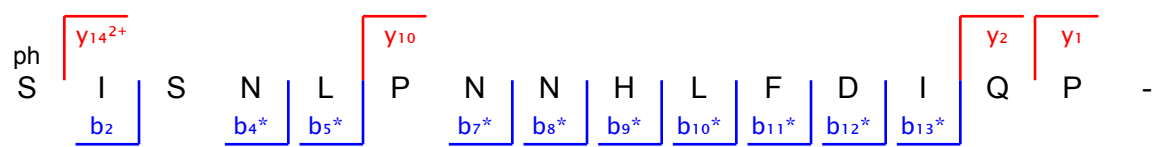



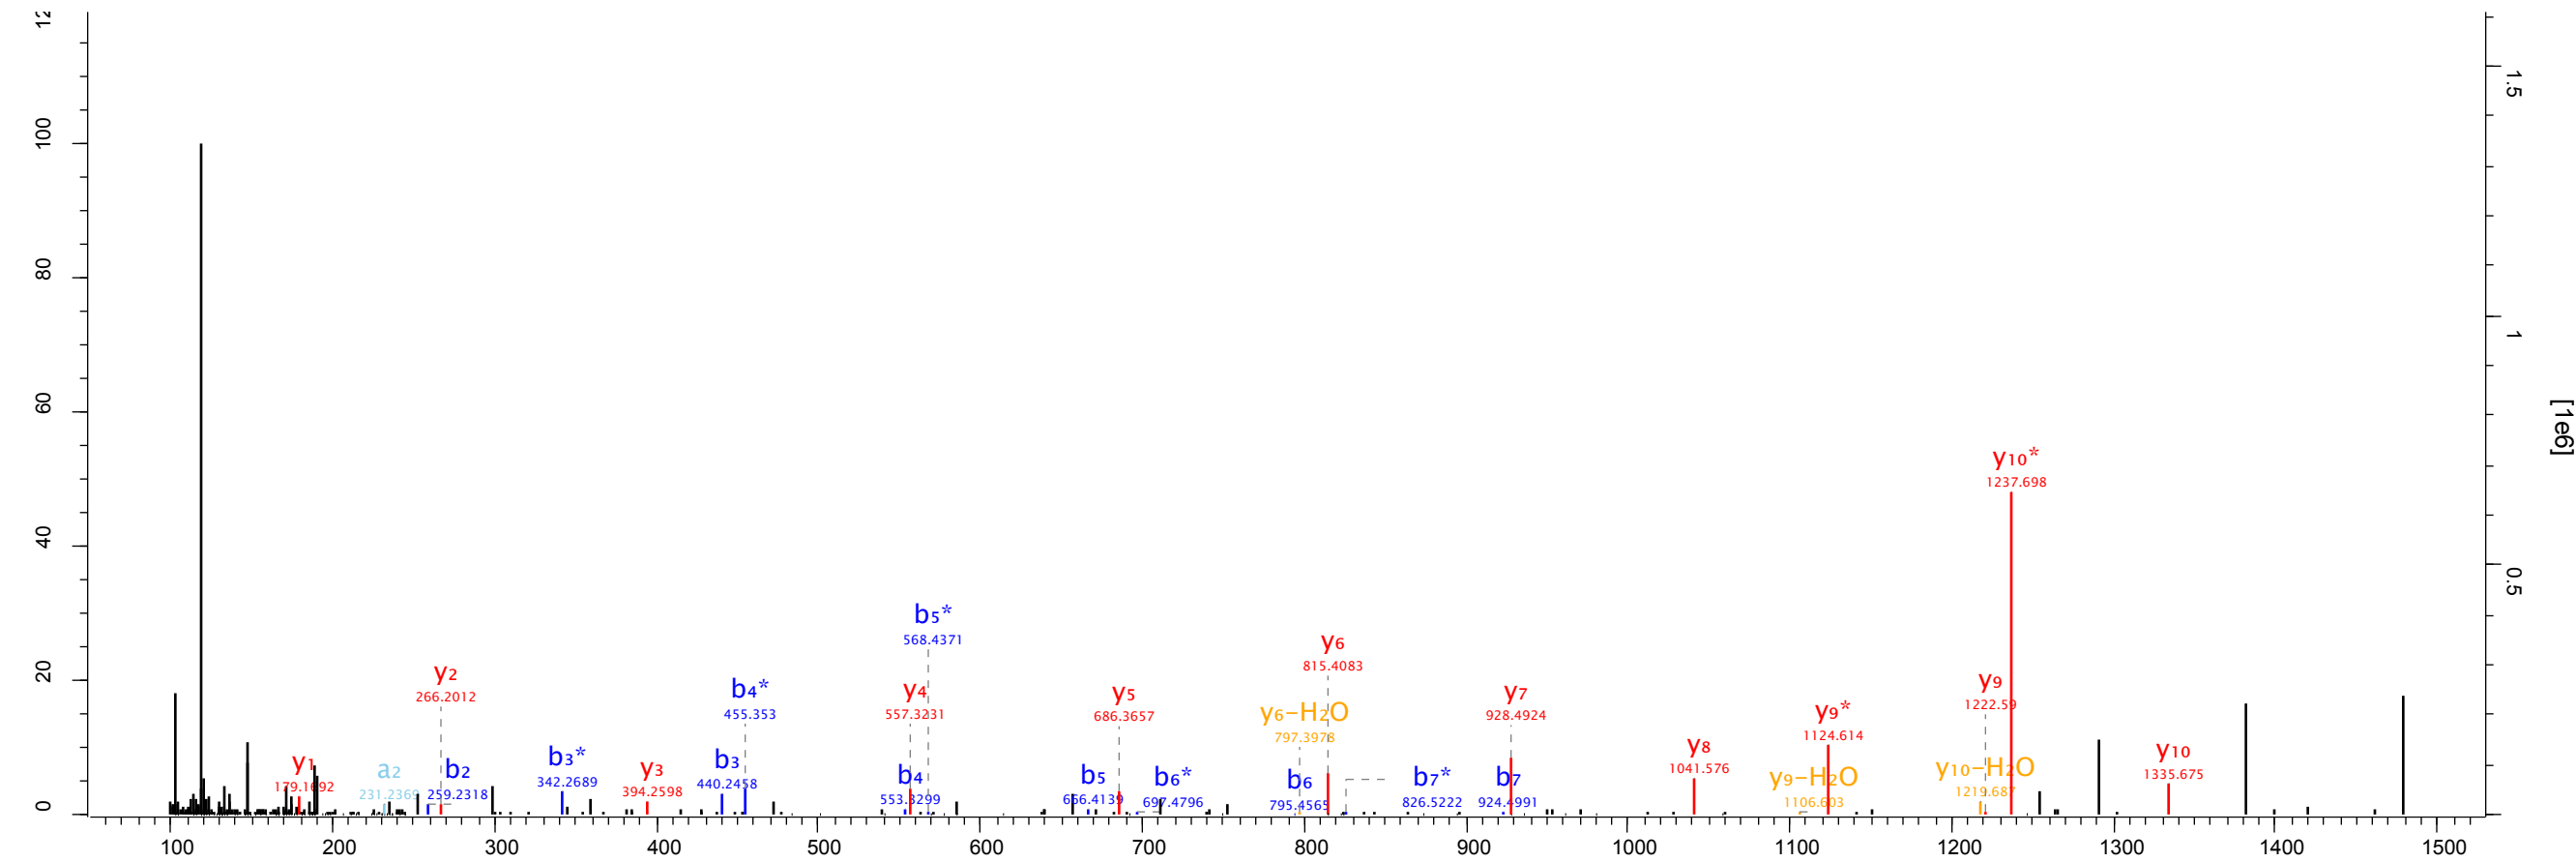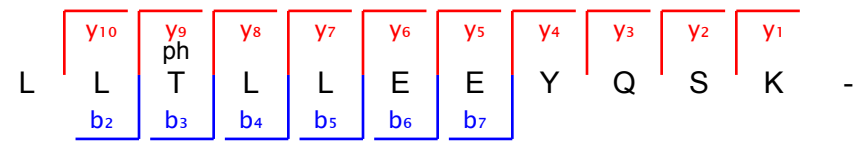

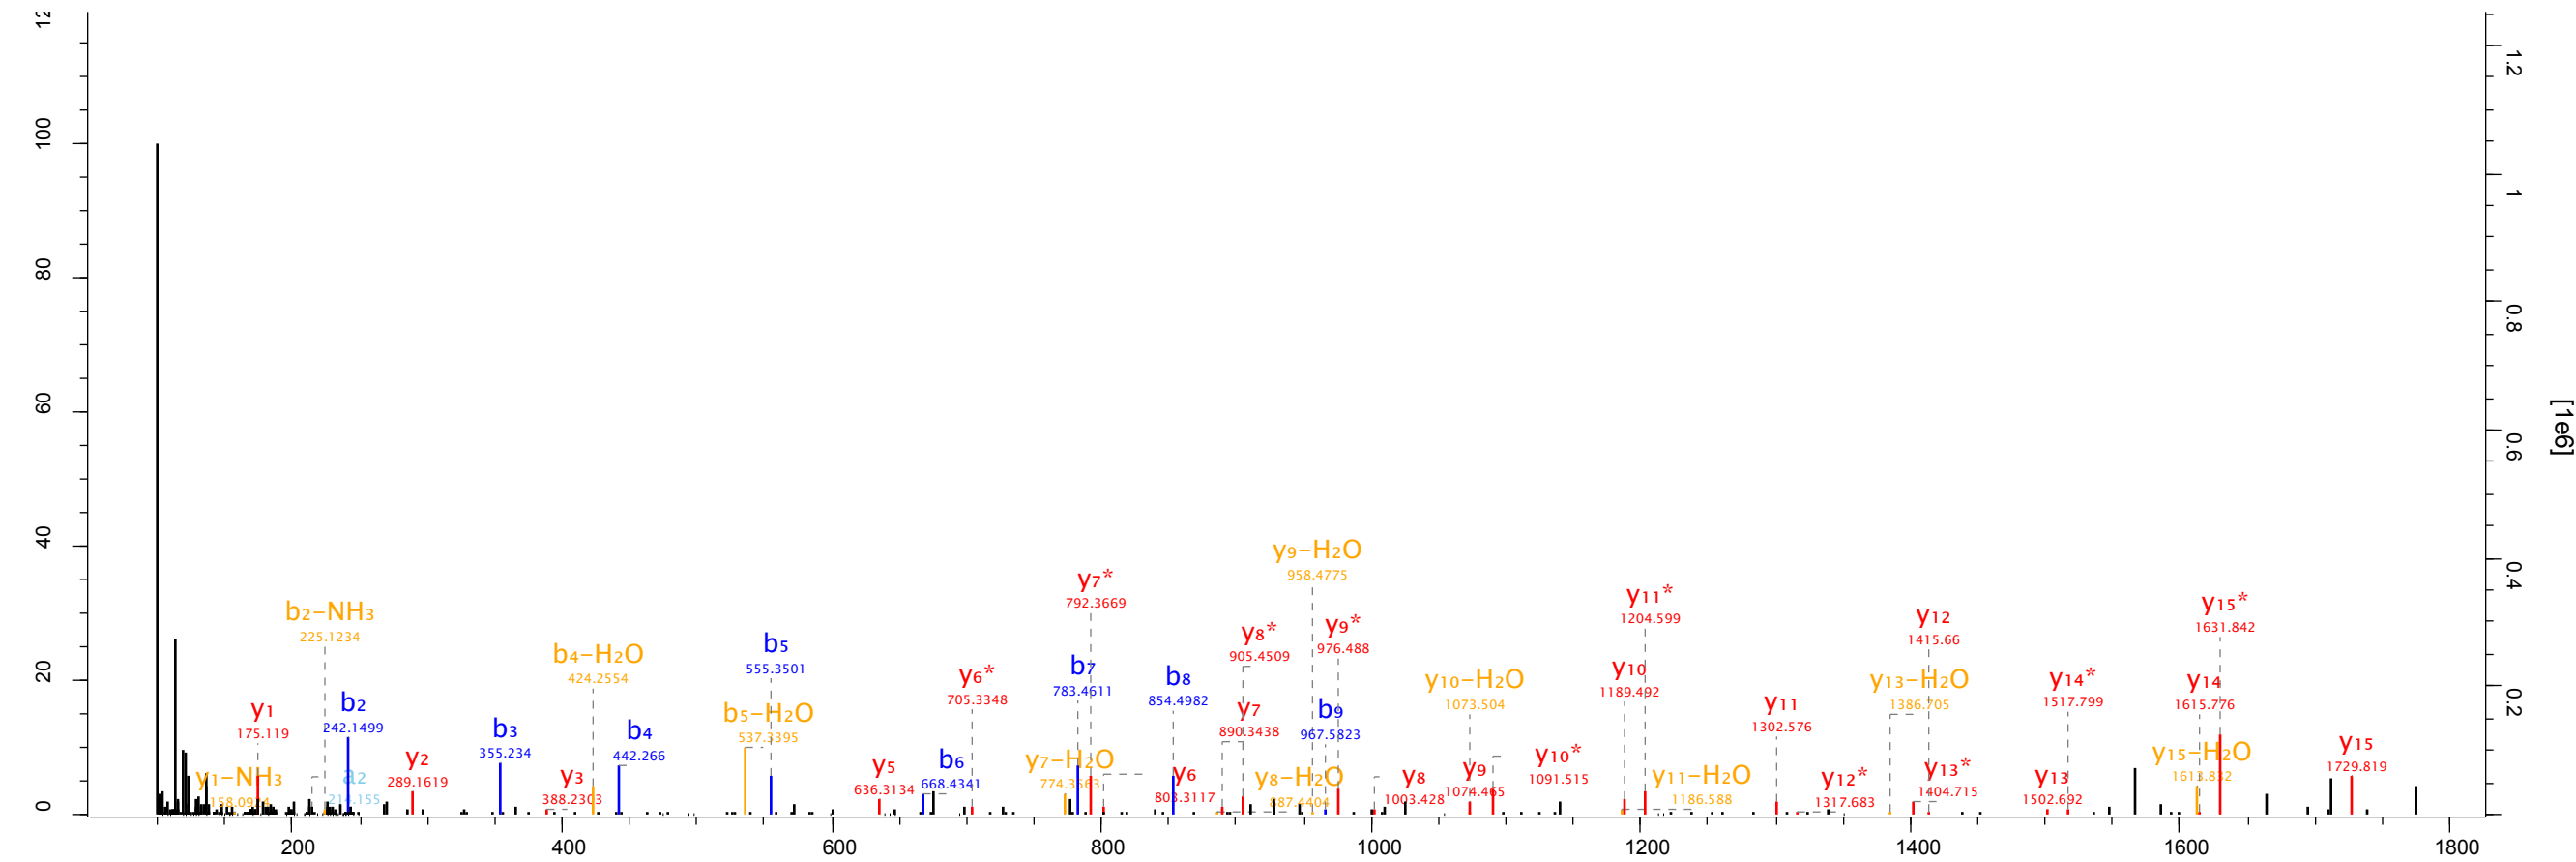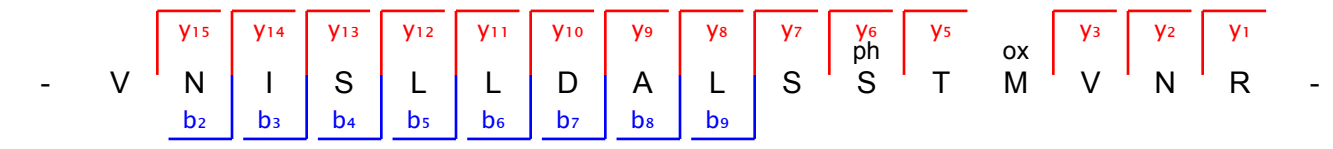

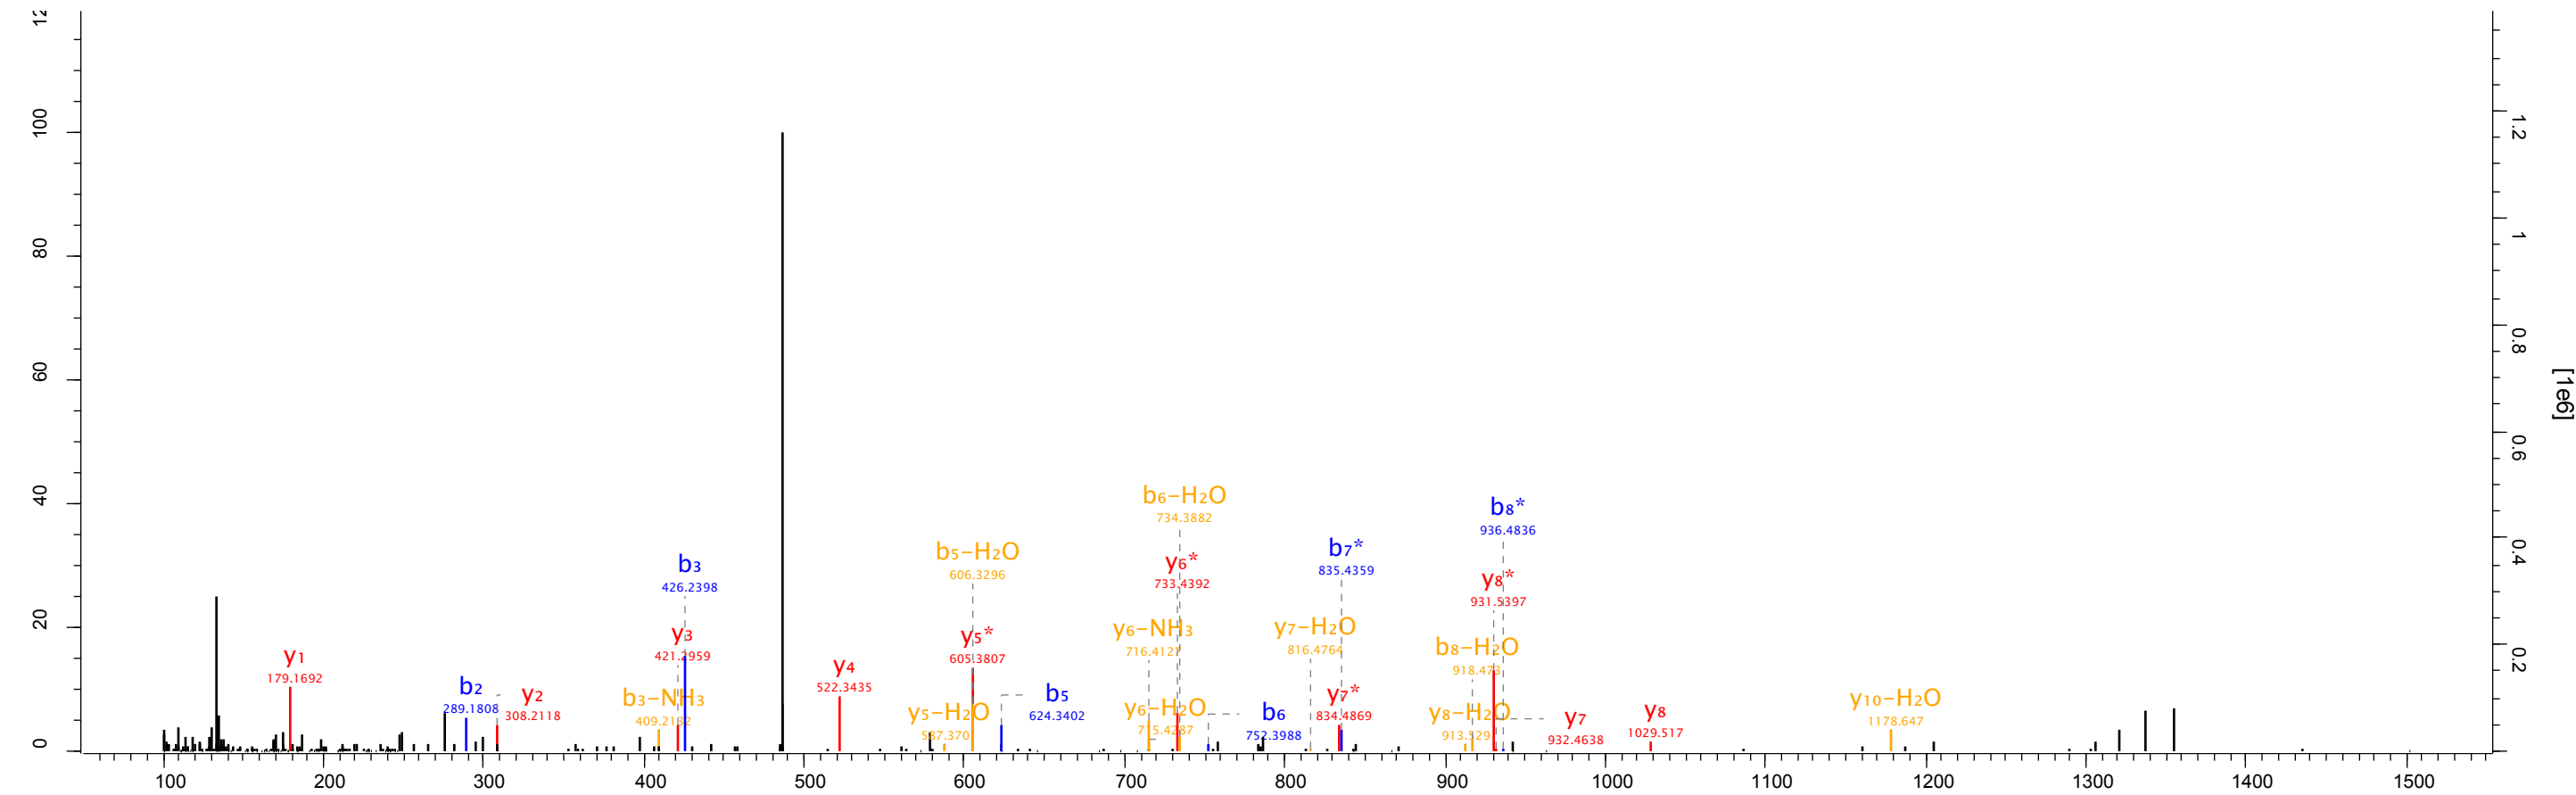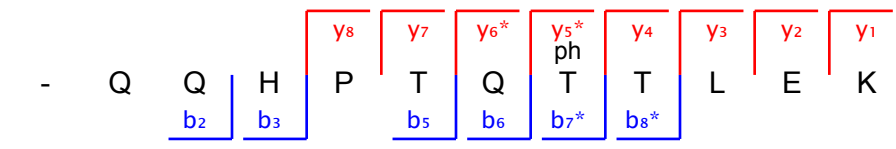



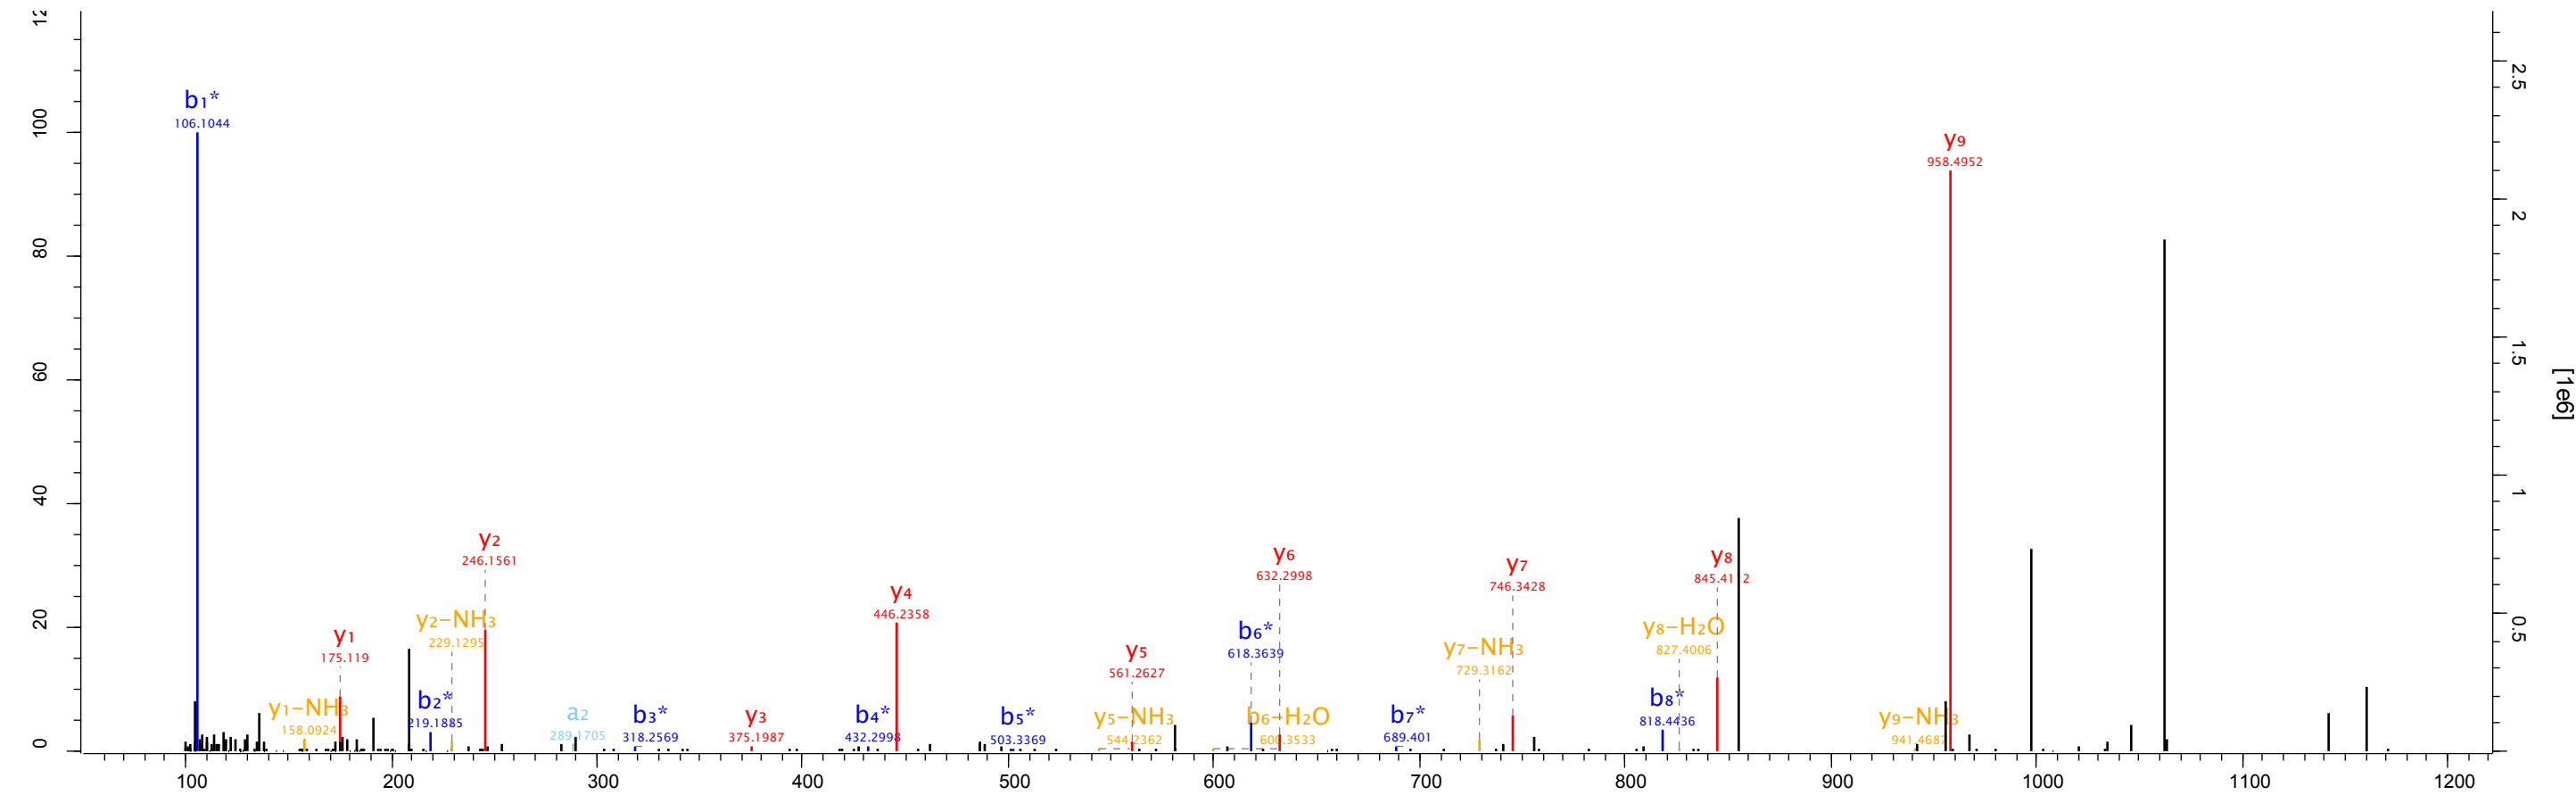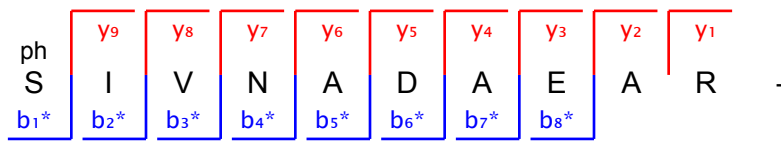

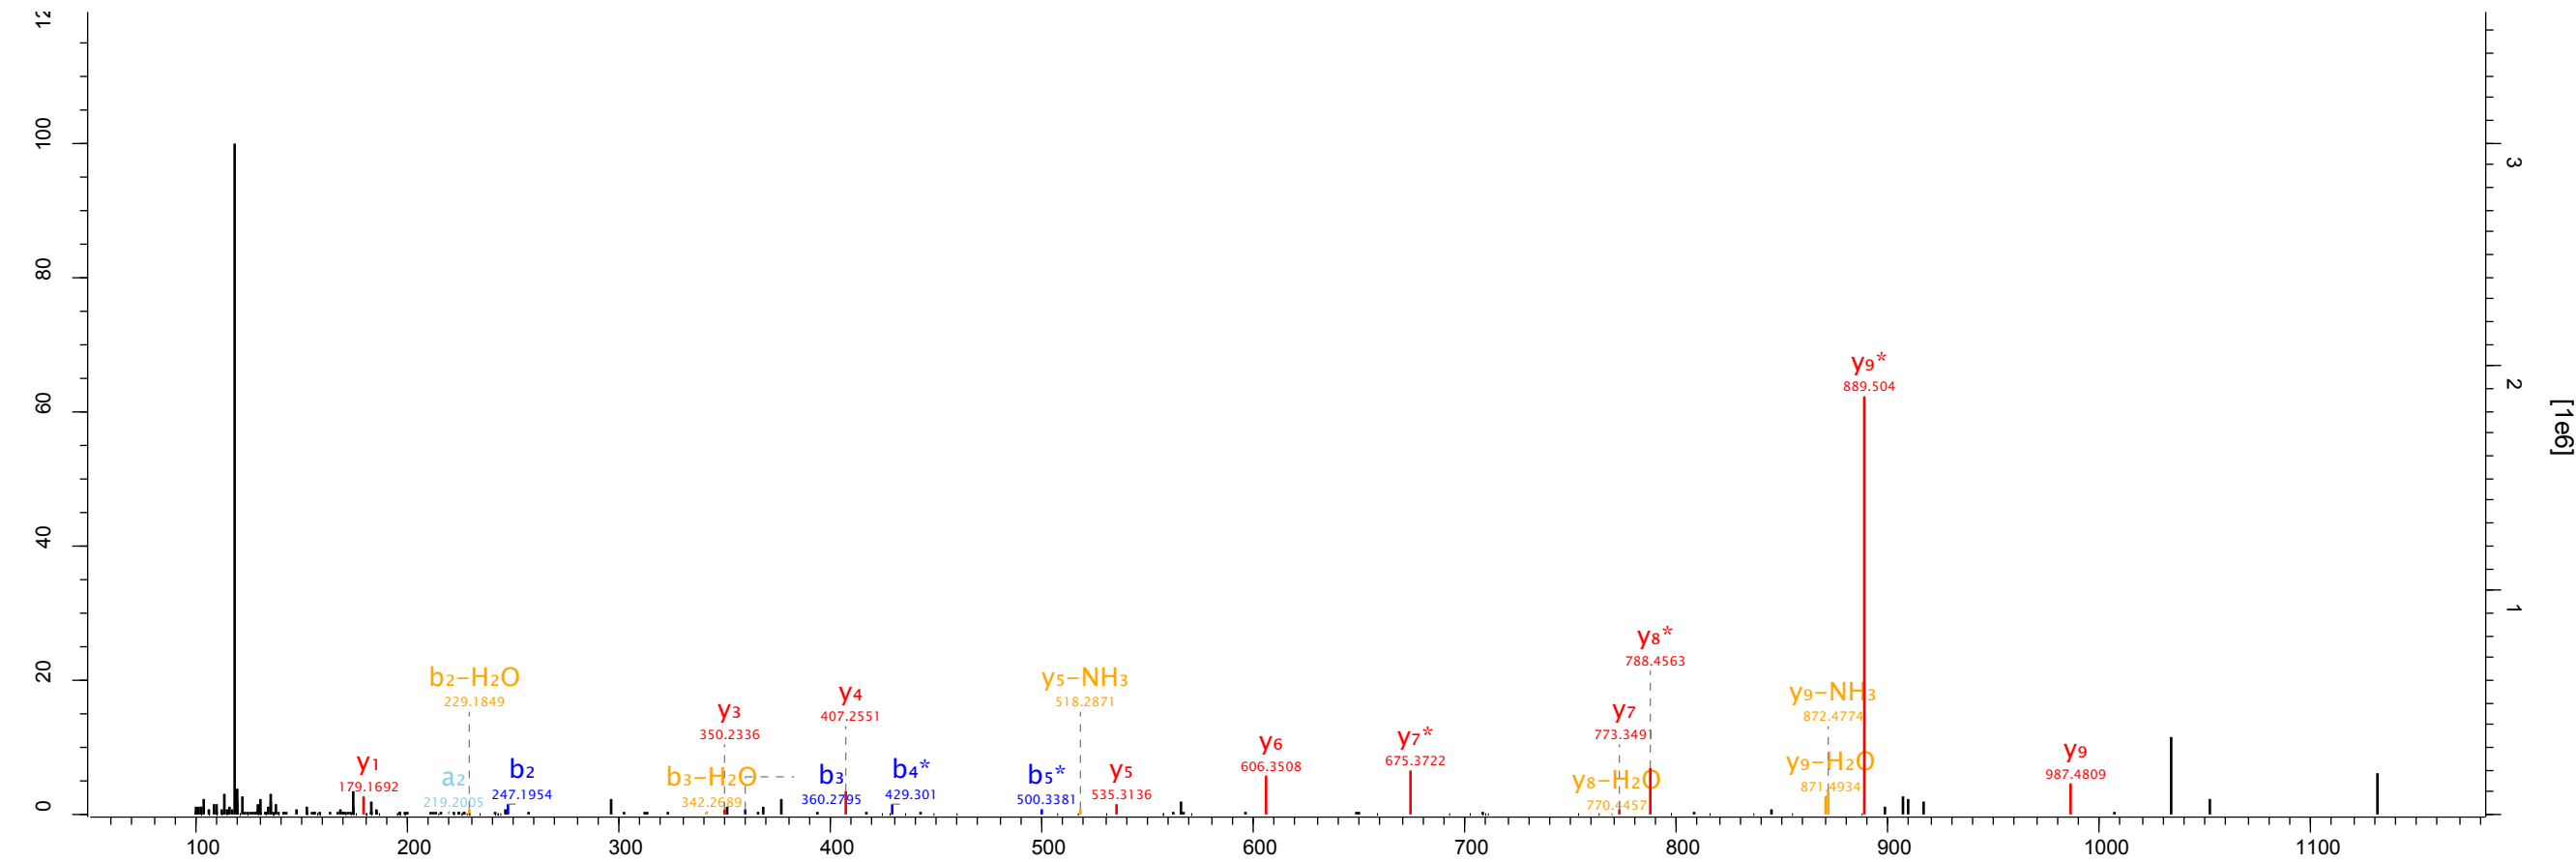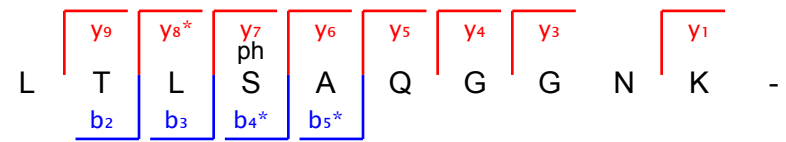

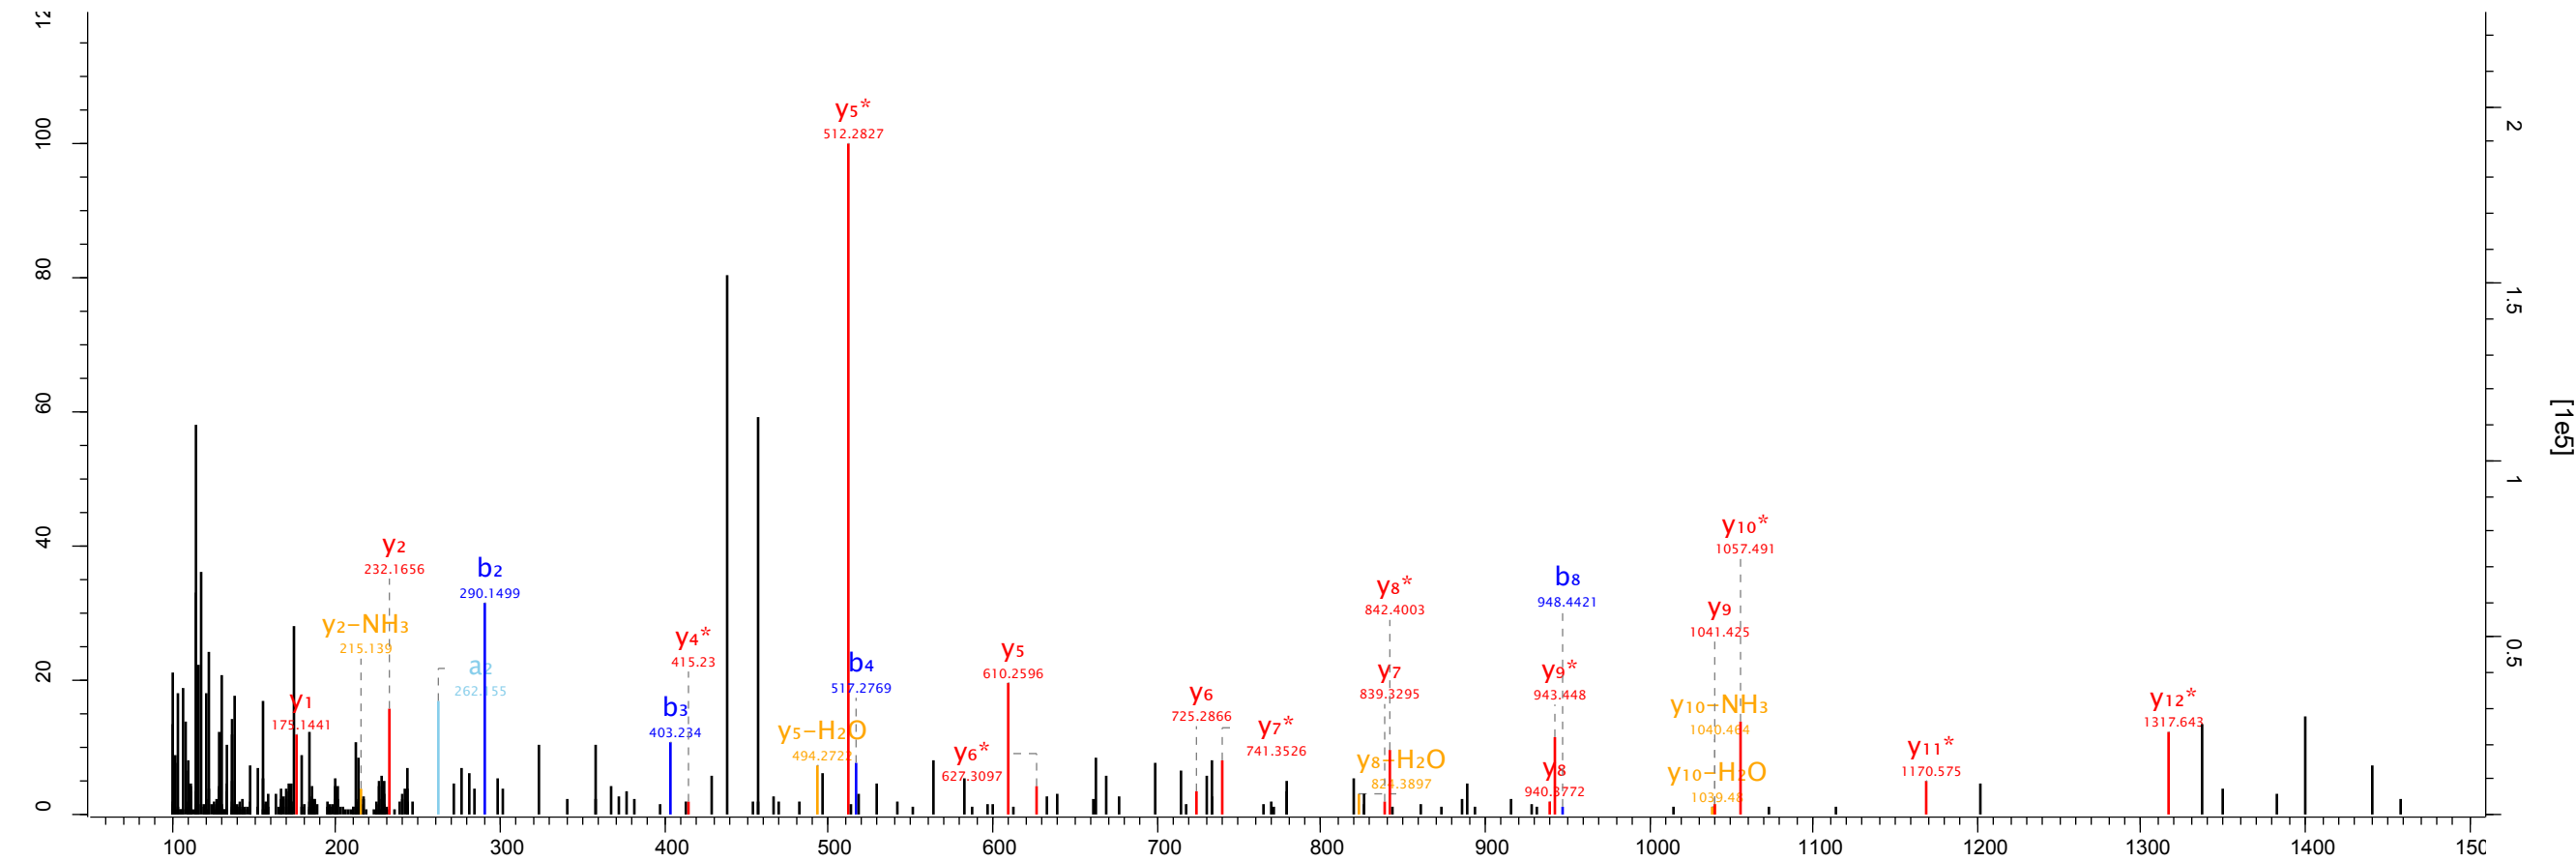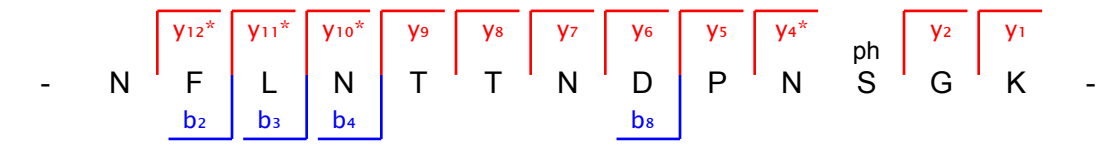

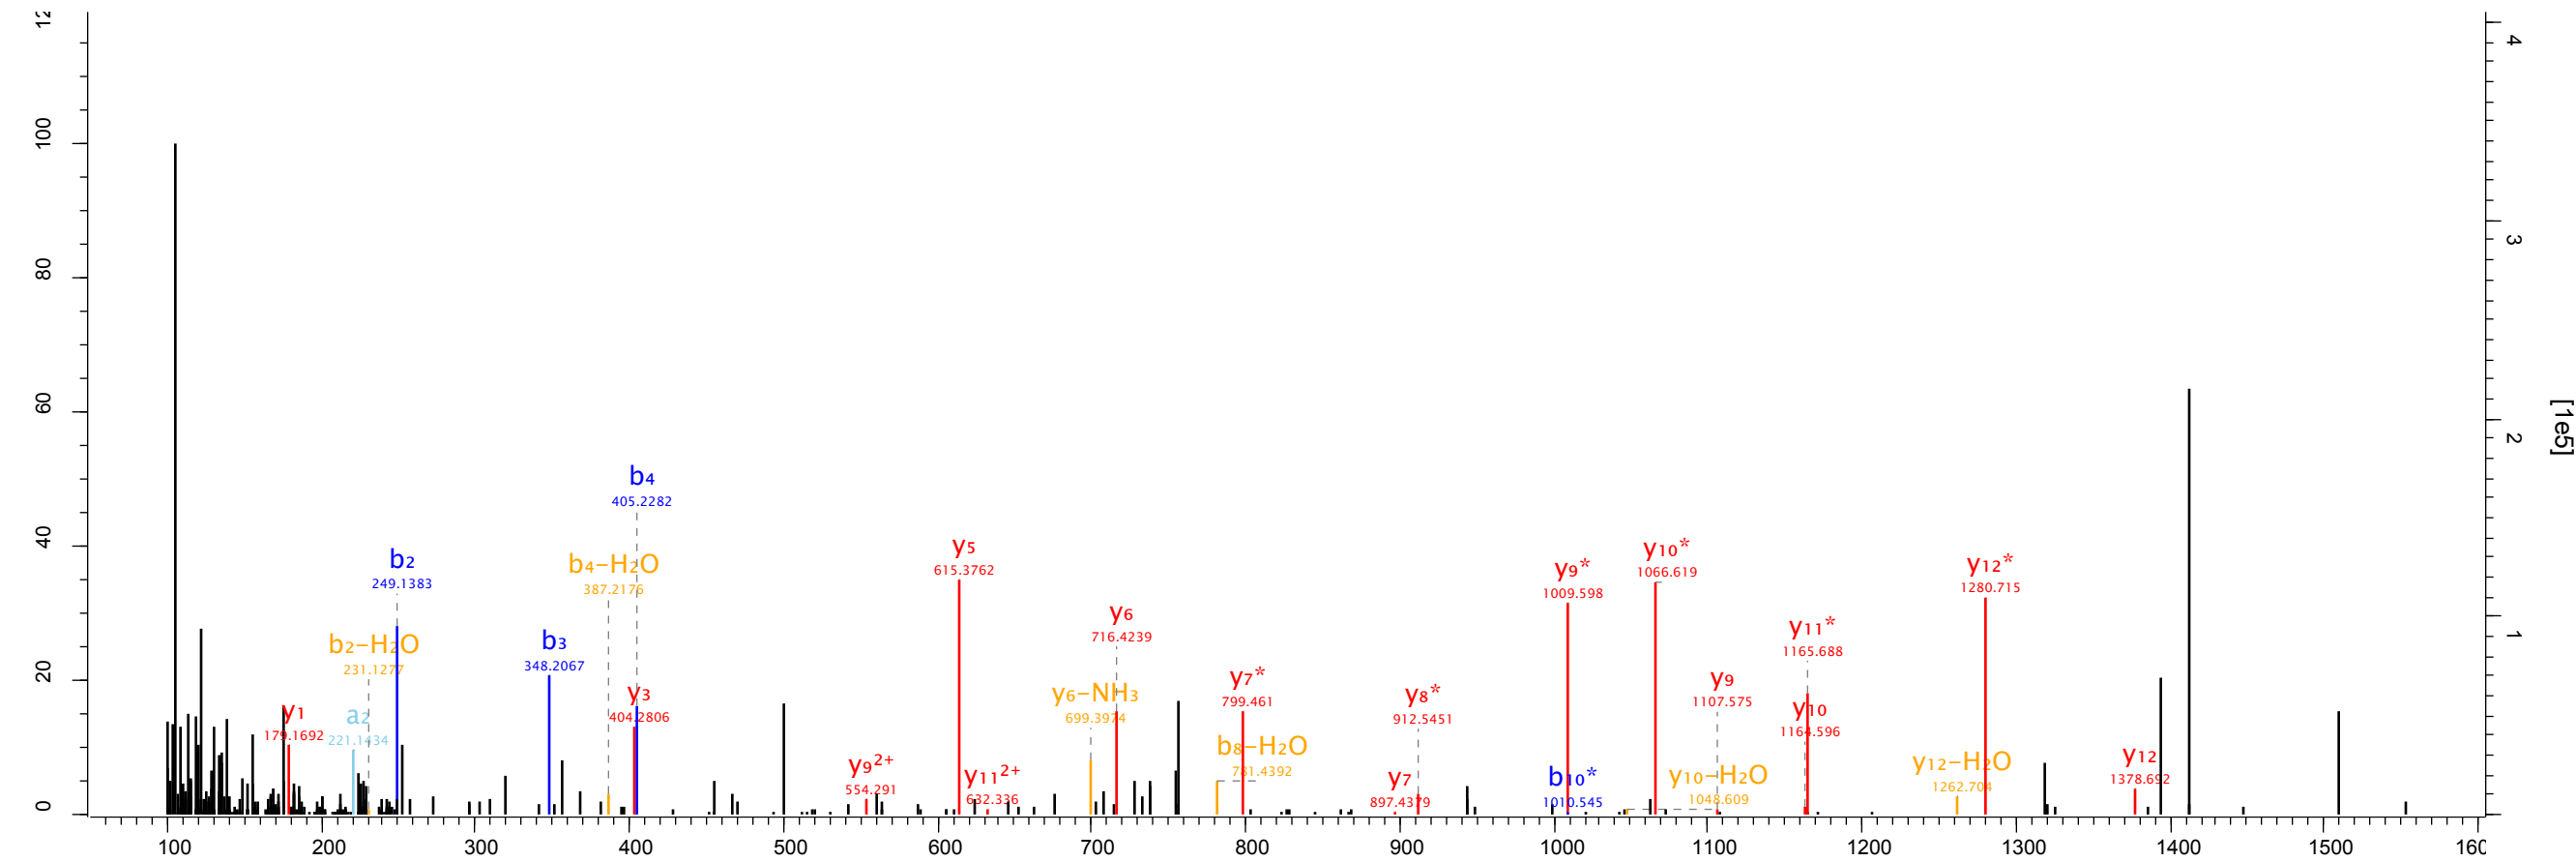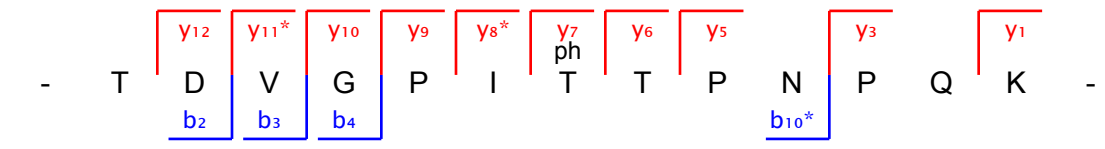



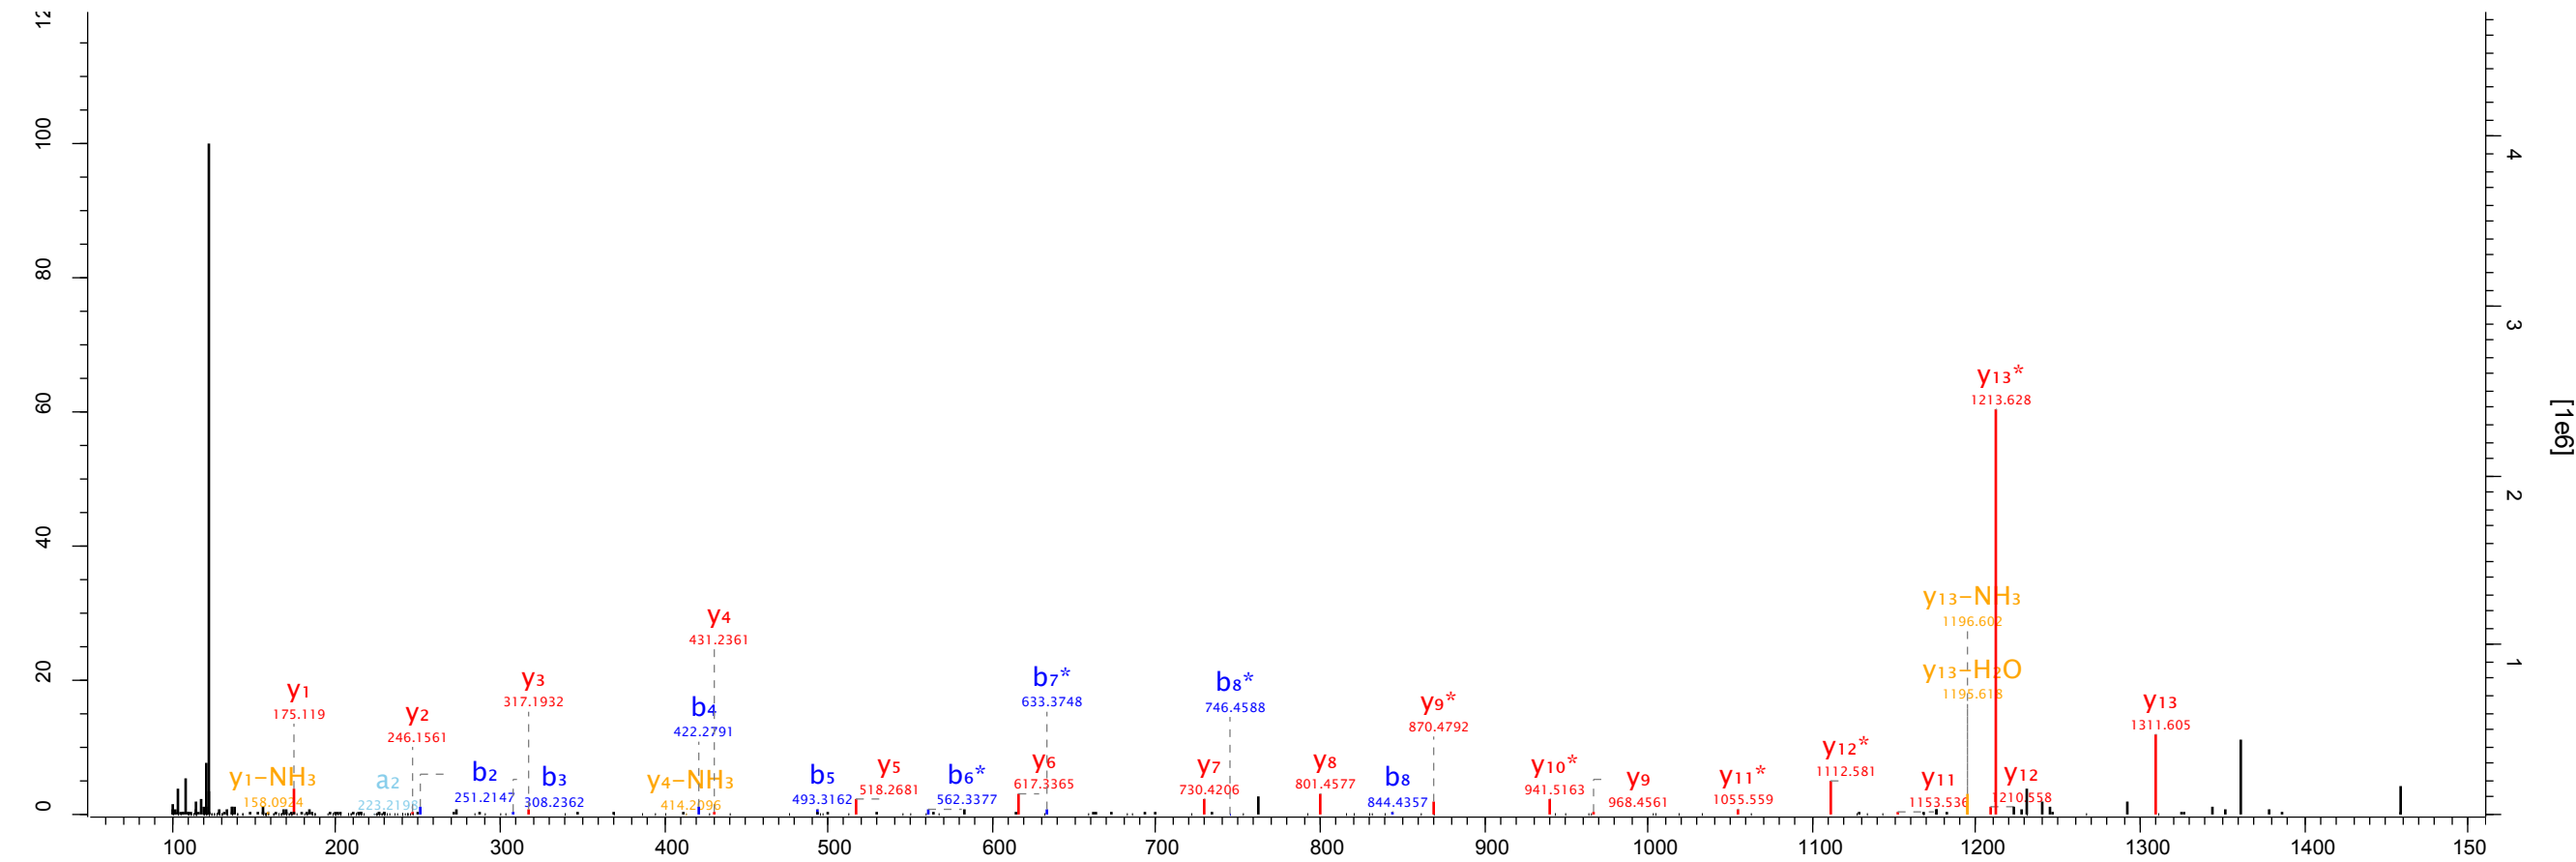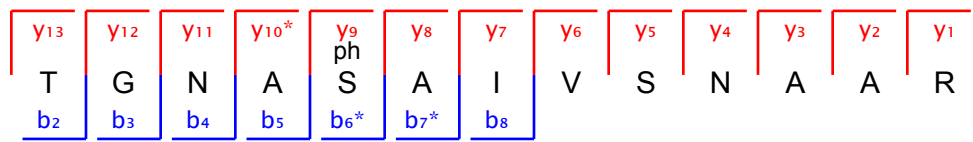

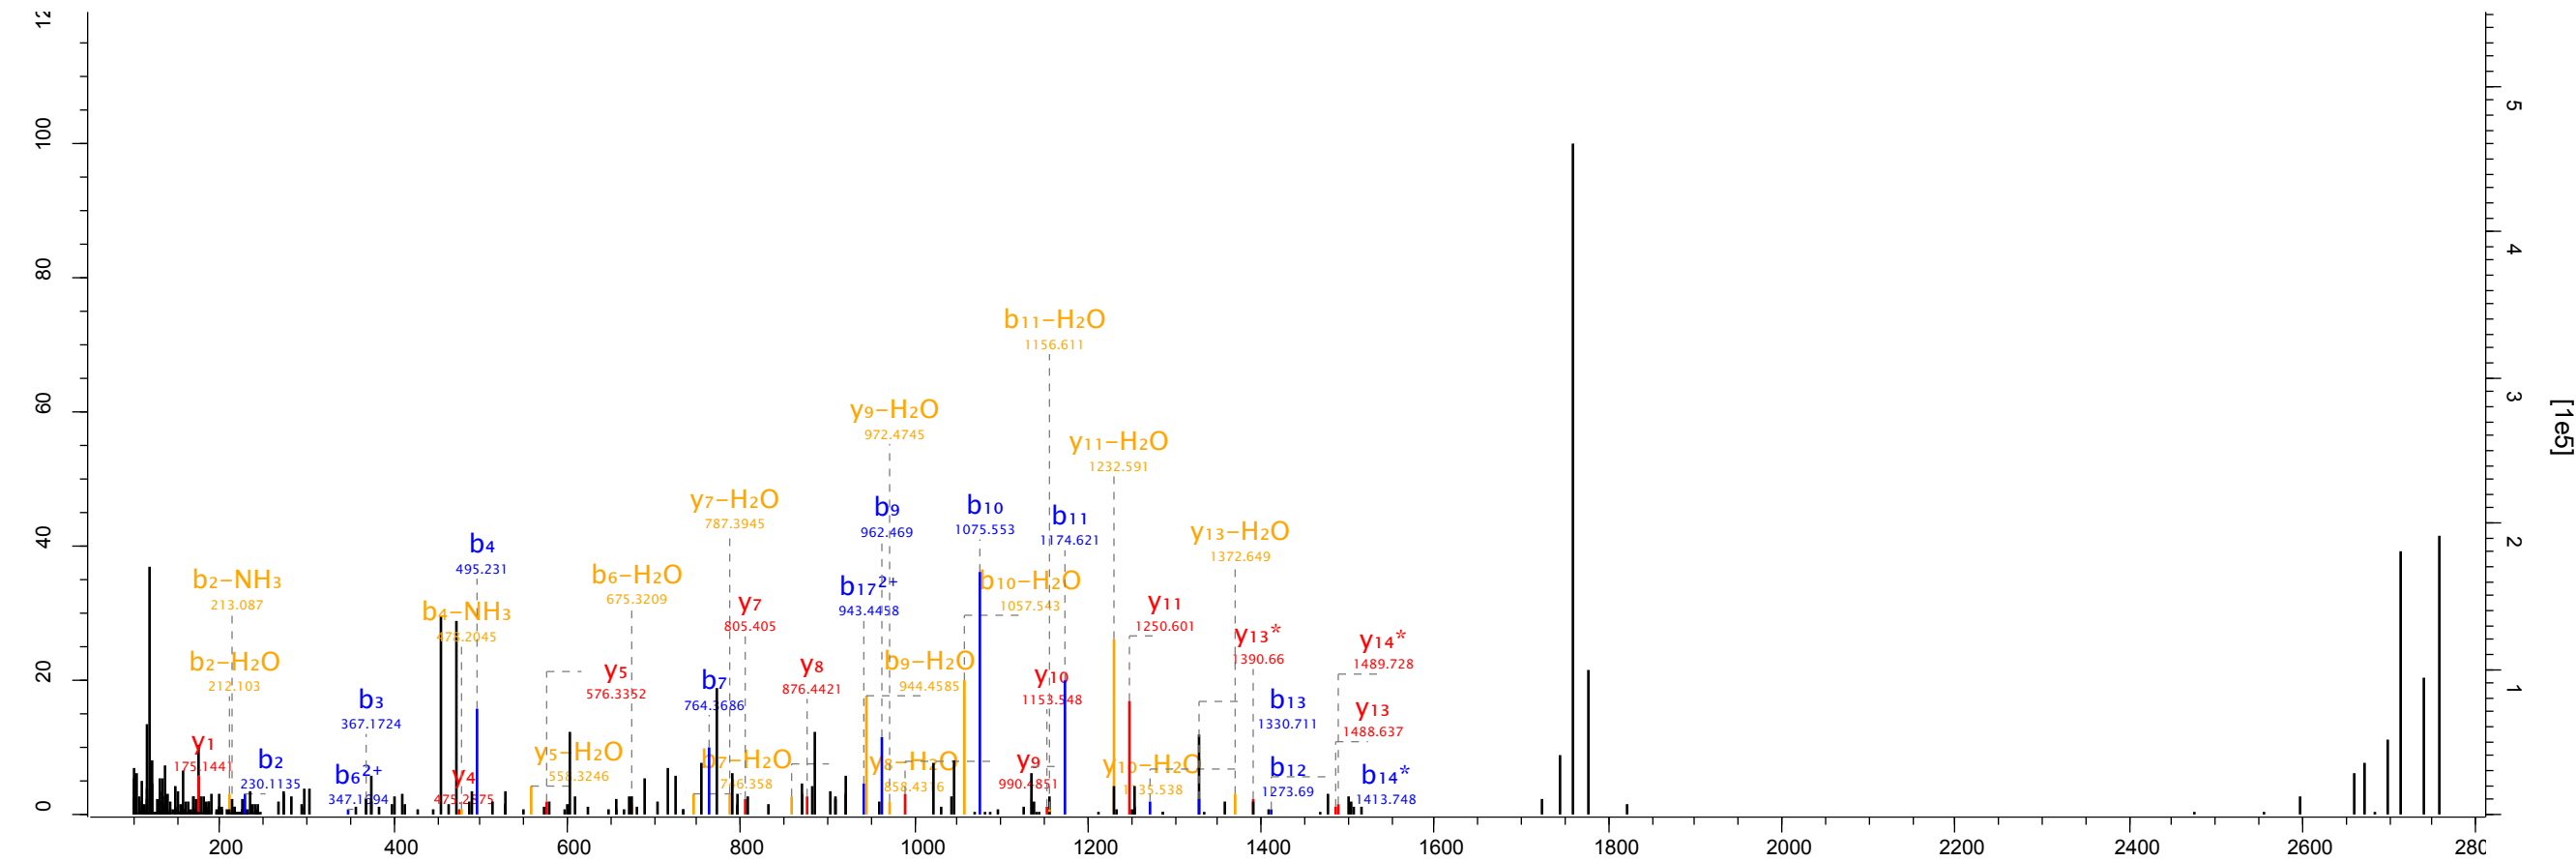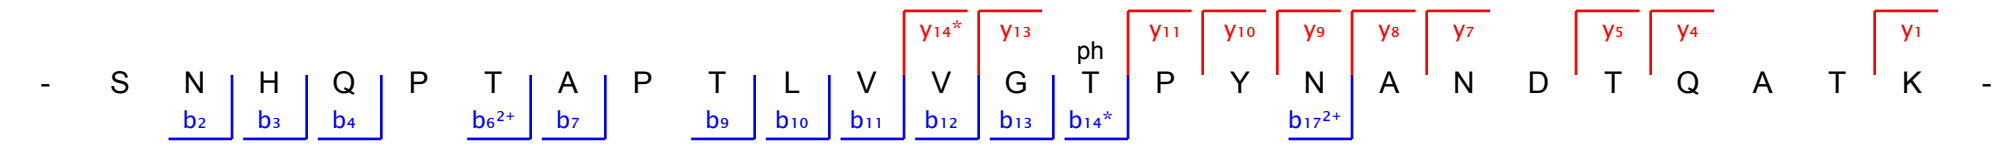

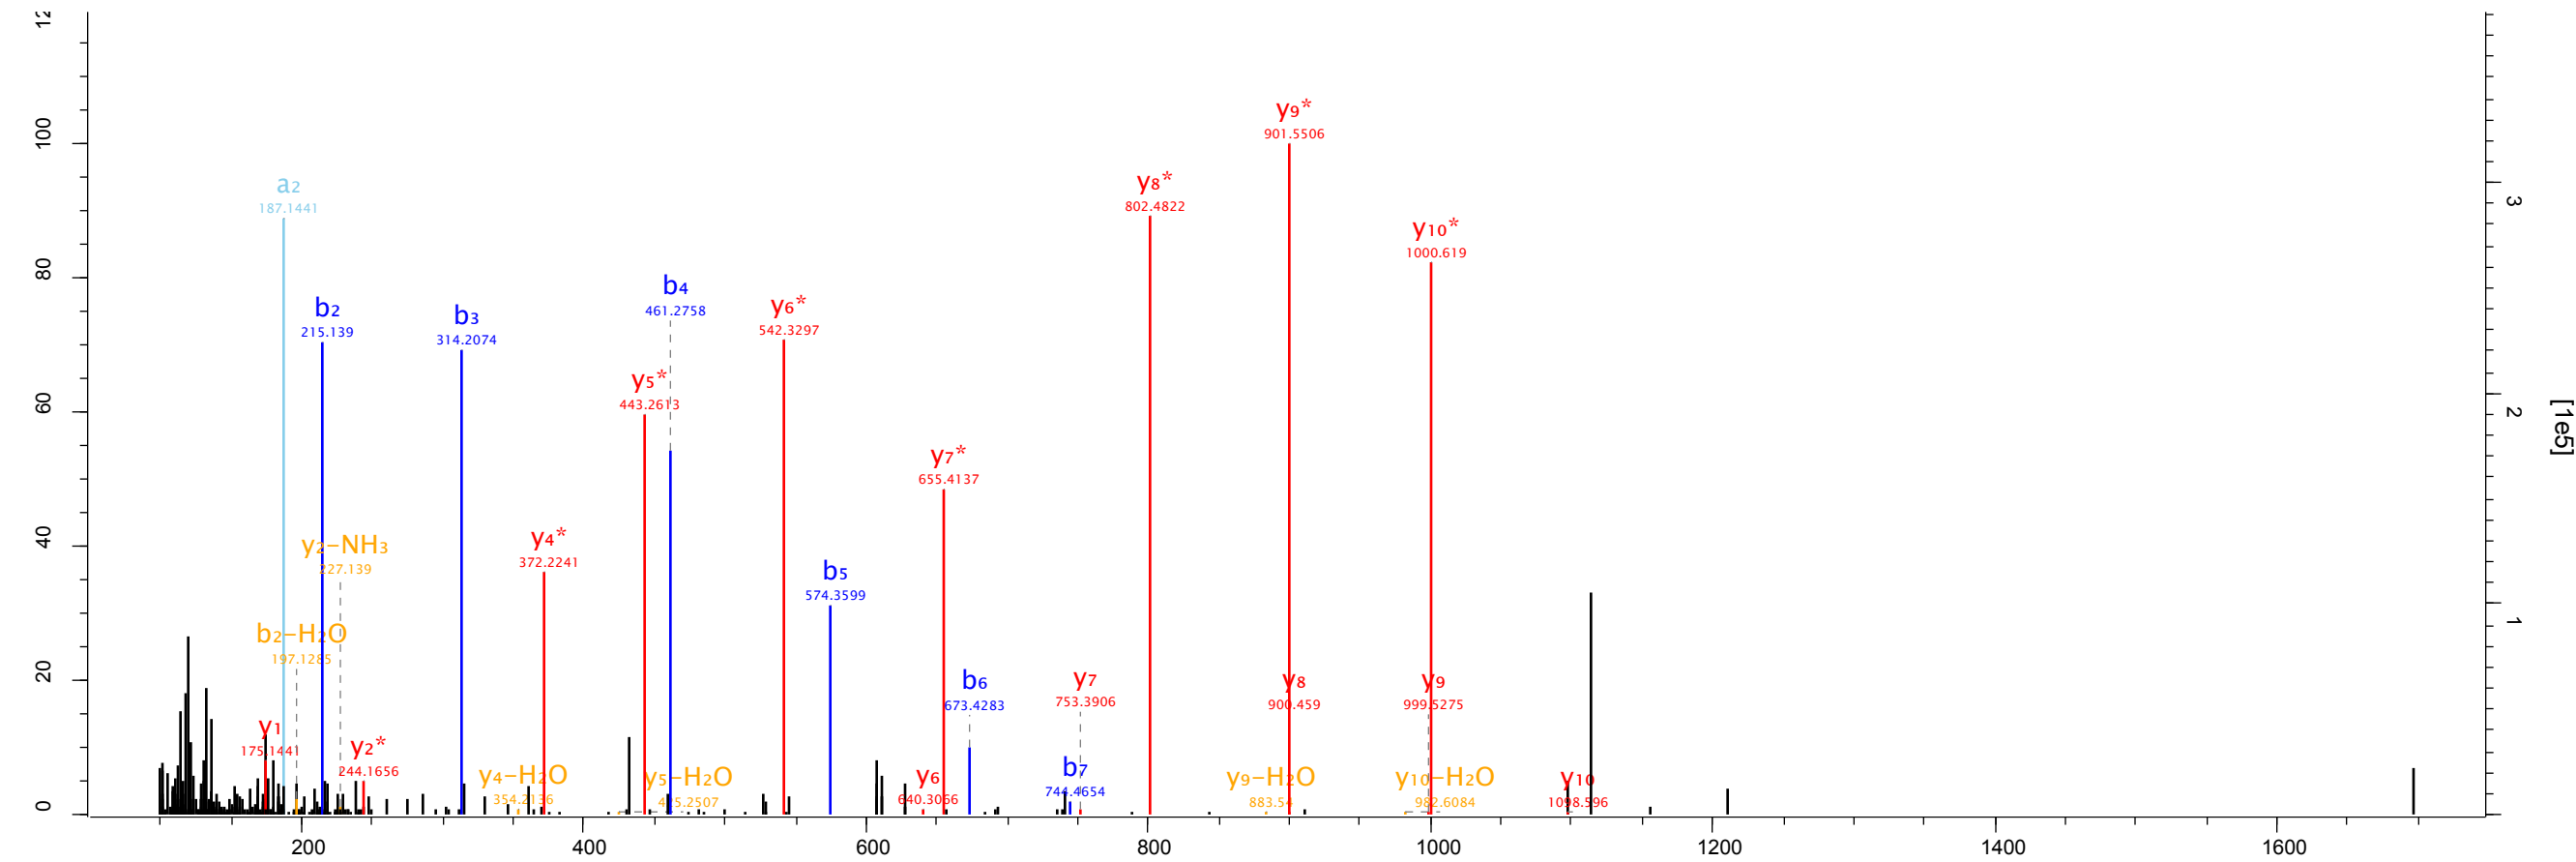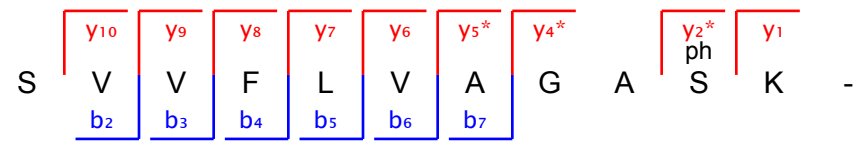

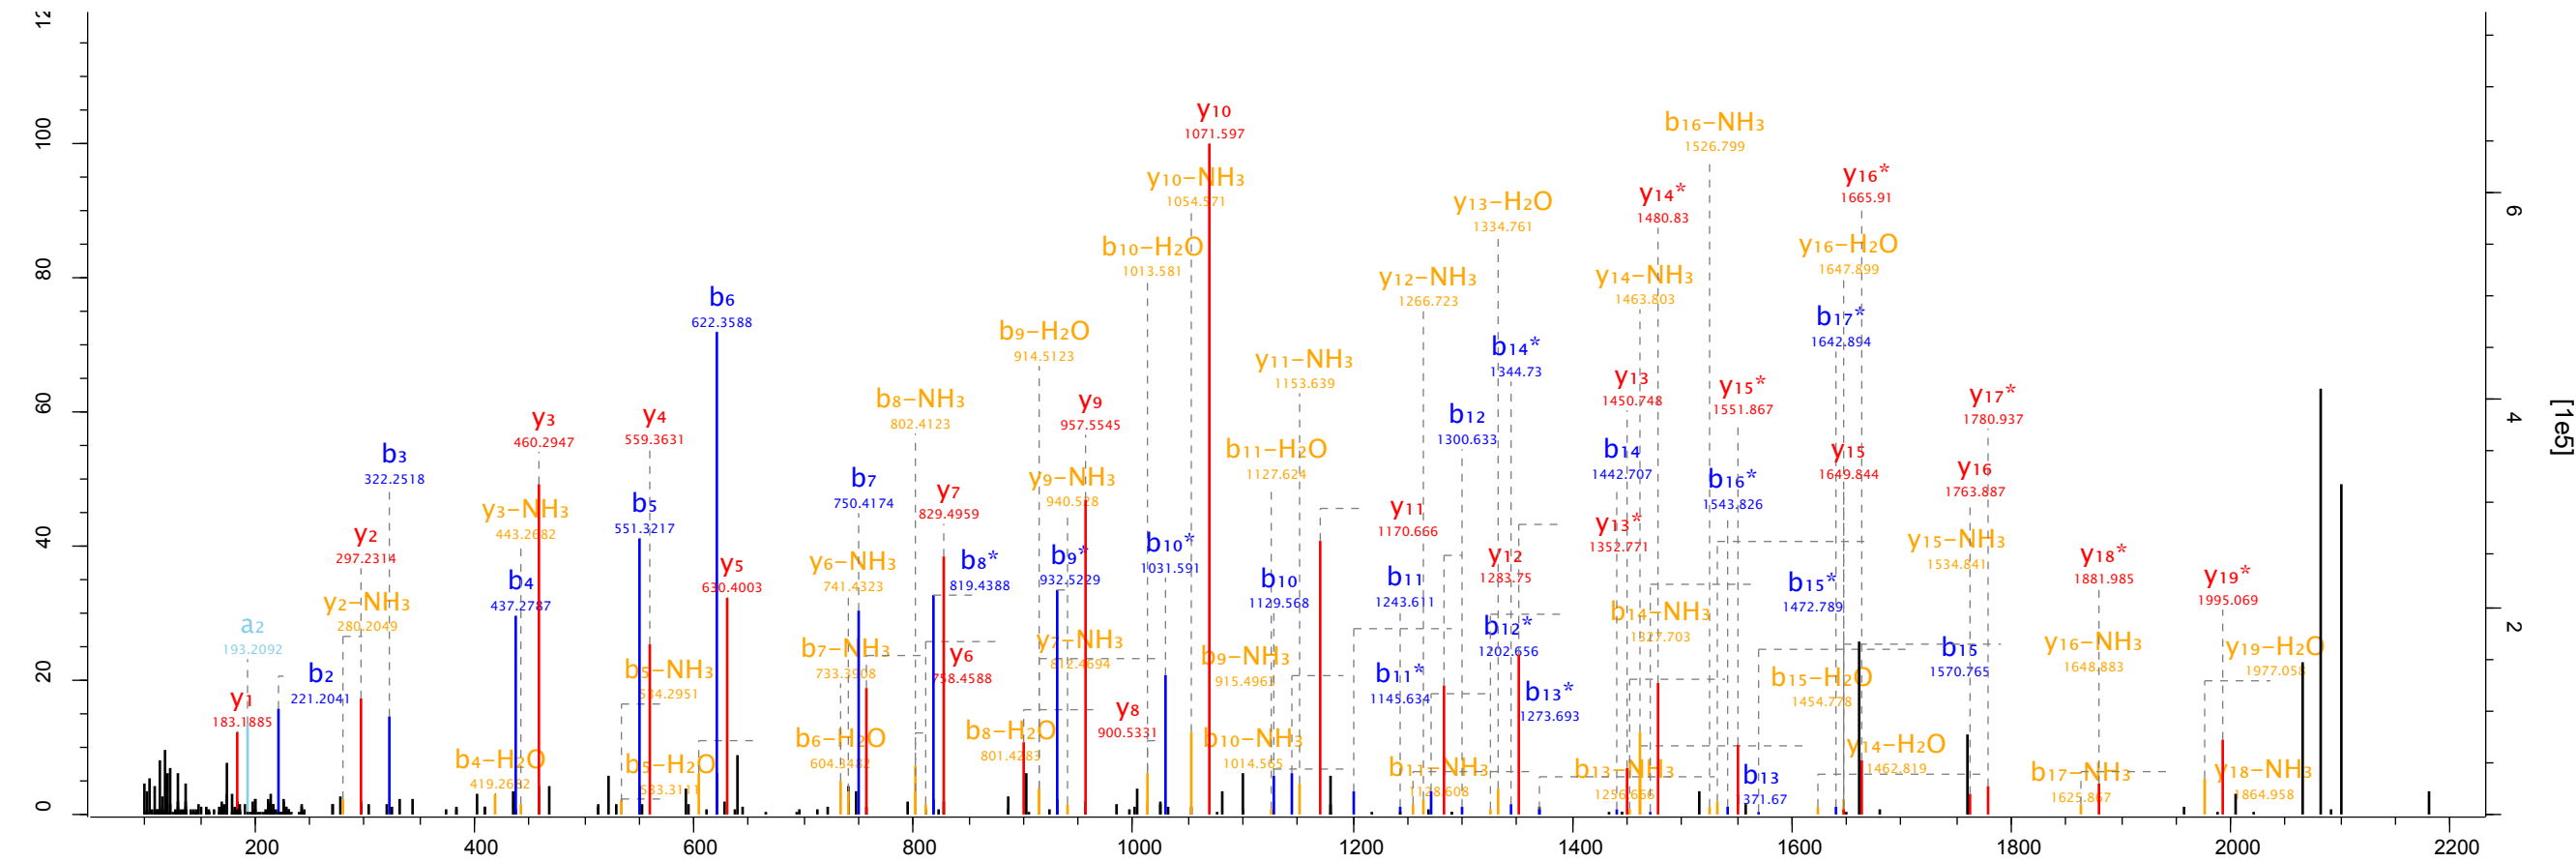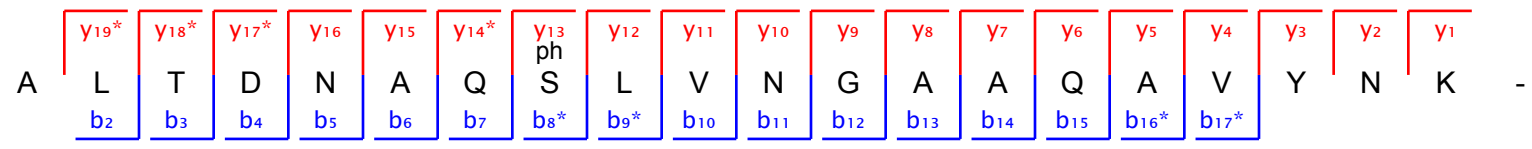



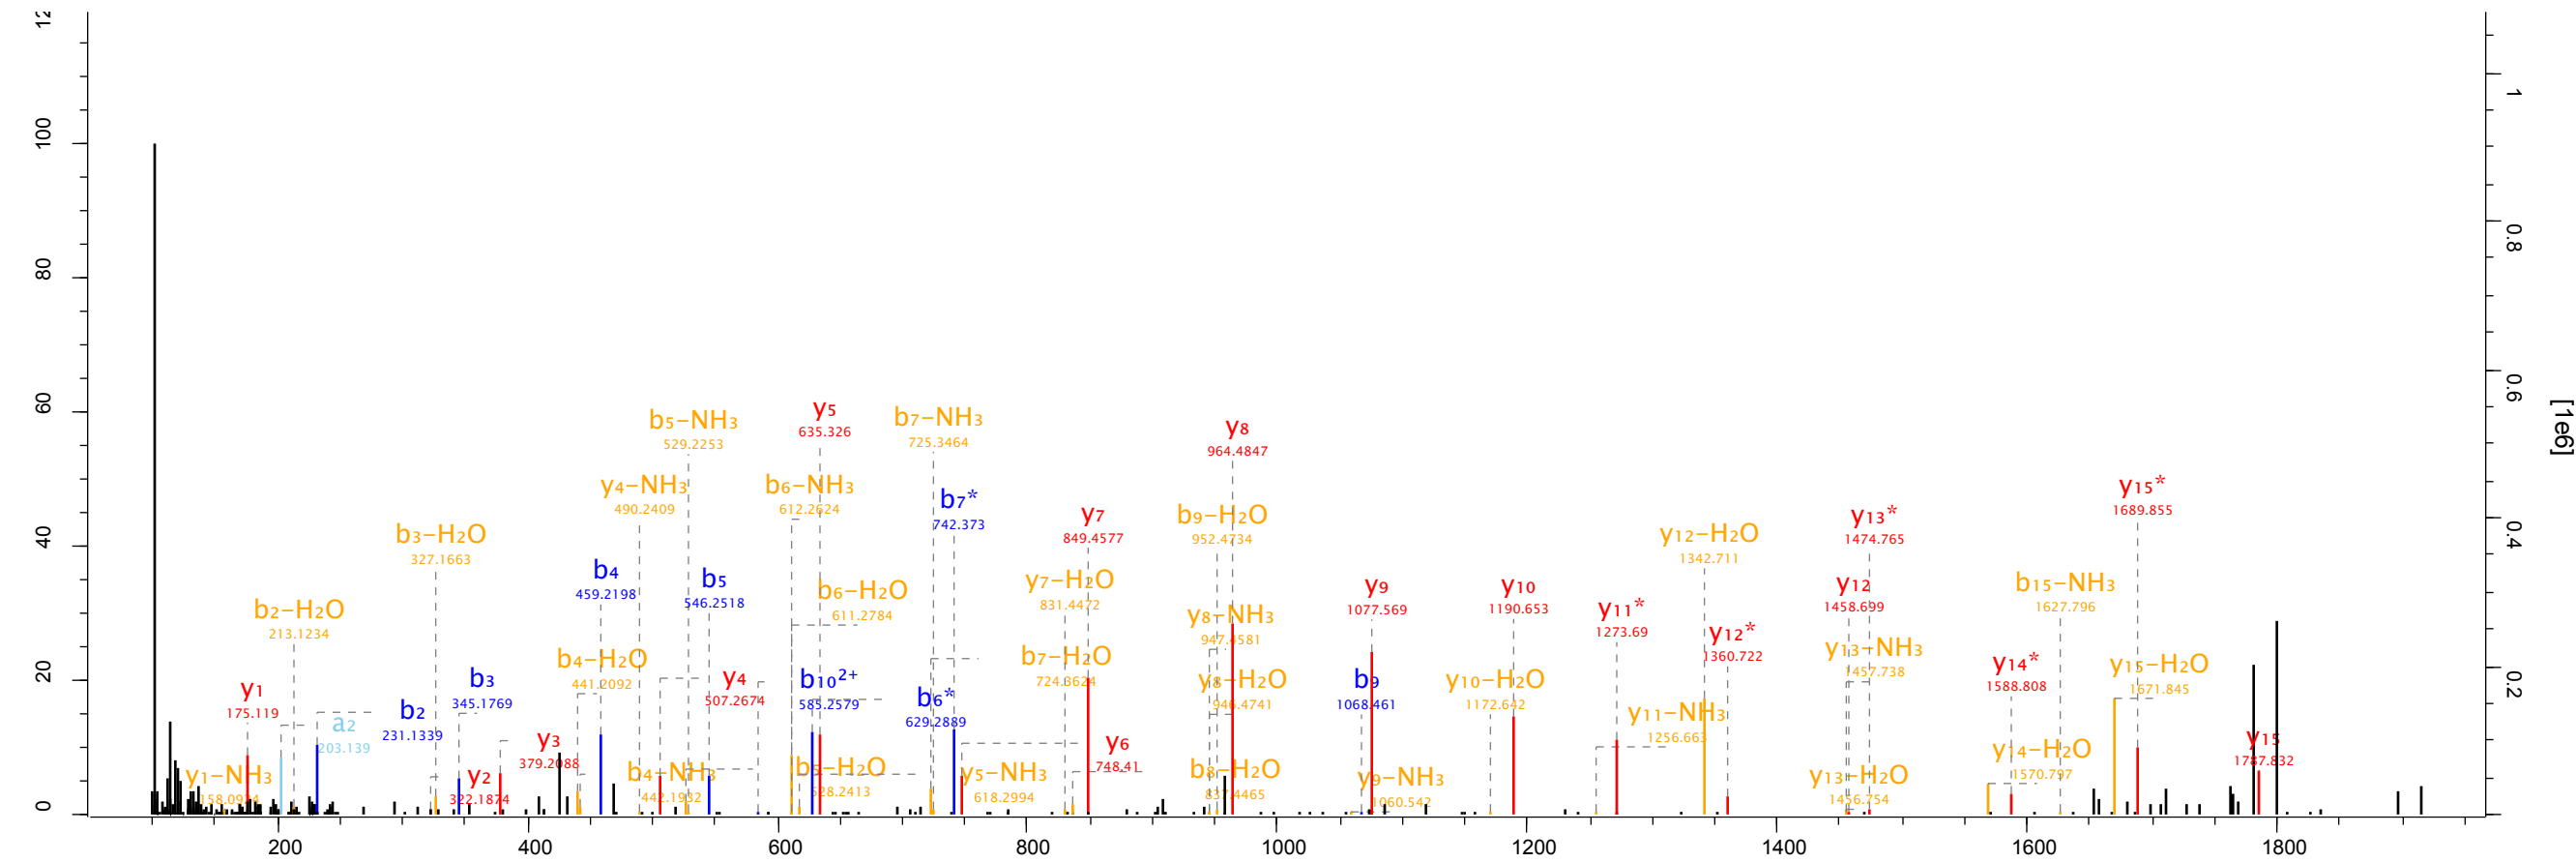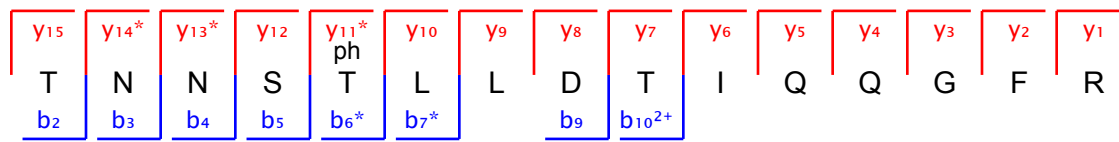

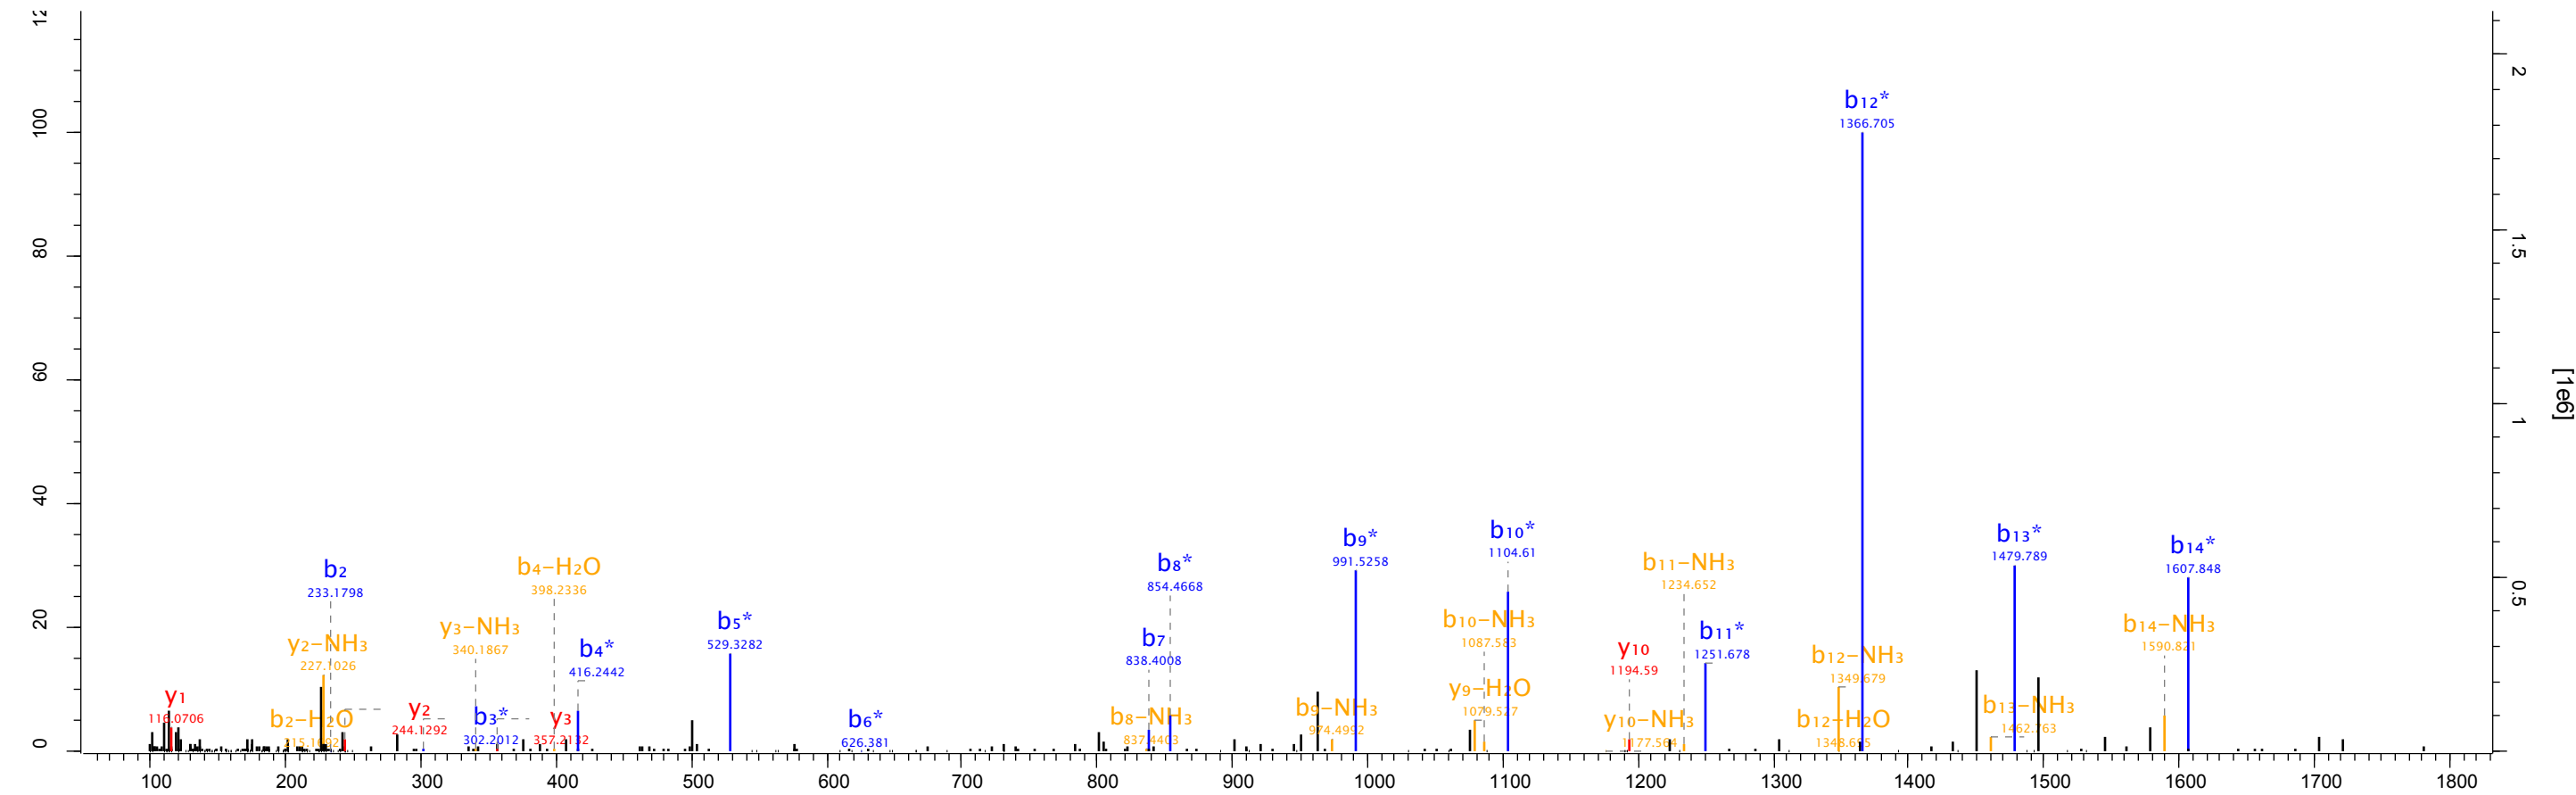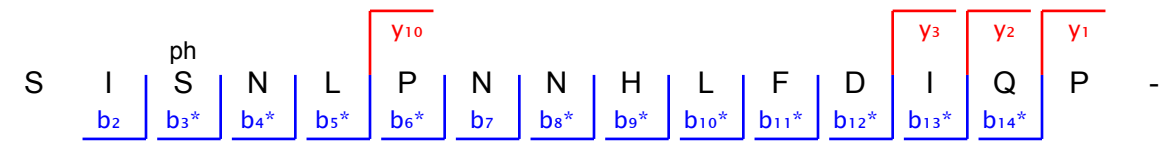

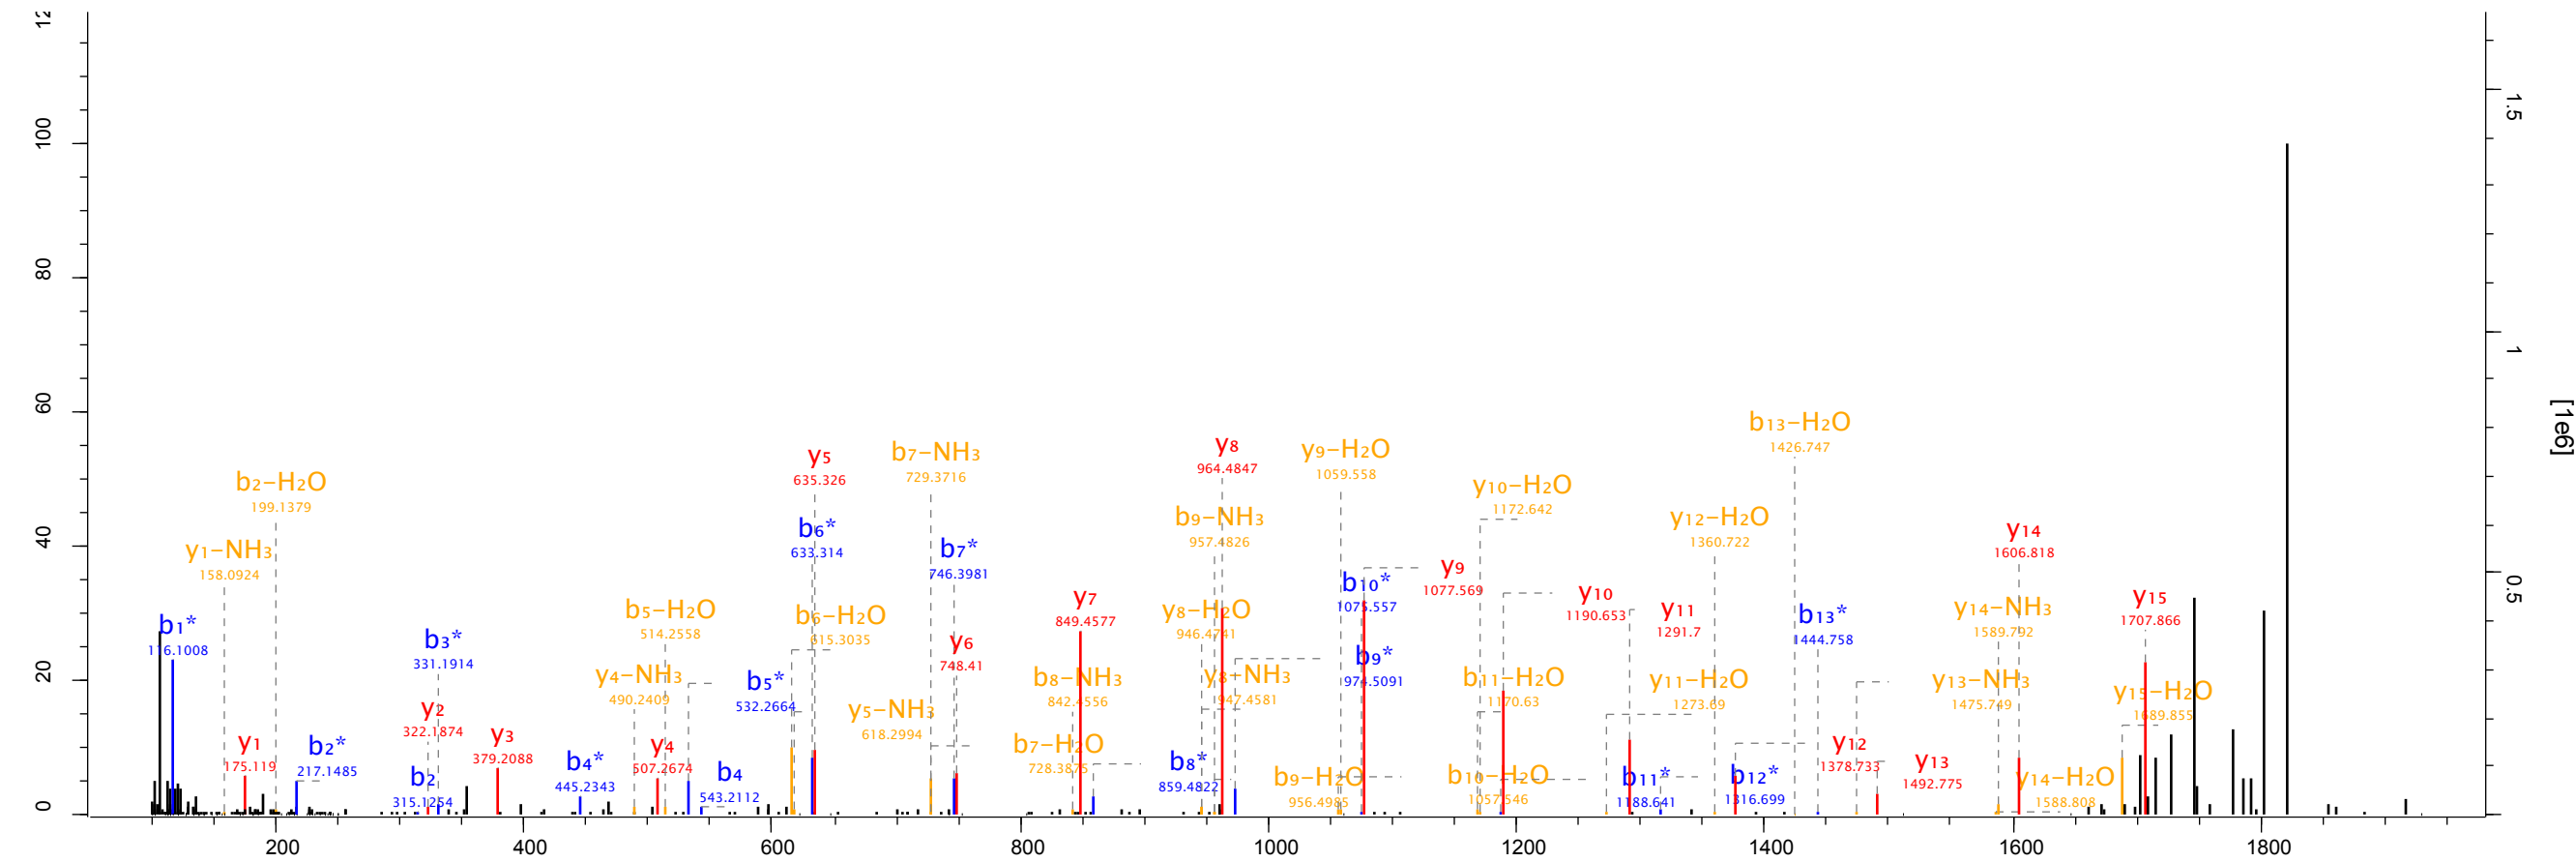

|                             |                 |                             |                 |                             |                             |                             |                             |                             |                              |                              |                              |                              |                |                |                |   |
|-----------------------------|-----------------|-----------------------------|-----------------|-----------------------------|-----------------------------|-----------------------------|-----------------------------|-----------------------------|------------------------------|------------------------------|------------------------------|------------------------------|----------------|----------------|----------------|---|
| ph                          | y <sub>15</sub> | y <sub>14</sub>             | y <sub>13</sub> | y <sub>12</sub>             | y <sub>11</sub>             | y <sub>10</sub>             | y <sub>9</sub>              | y <sub>8</sub>              | y <sub>7</sub>               | y <sub>6</sub>               | y <sub>5</sub>               | y <sub>4</sub>               | y <sub>3</sub> | y <sub>2</sub> | y <sub>1</sub> | - |
| T                           | T               | N                           | N               | S                           | T                           | L                           | L                           | D                           | T                            | I                            | Q                            | Q                            | G              | F              | R              | - |
| b <sub>1</sub> <sup>*</sup> | b <sub>2</sub>  | b <sub>3</sub> <sup>*</sup> | b <sub>4</sub>  | b <sub>5</sub> <sup>*</sup> | b <sub>6</sub> <sup>*</sup> | b <sub>7</sub> <sup>*</sup> | b <sub>8</sub> <sup>*</sup> | b <sub>9</sub> <sup>*</sup> | b <sub>10</sub> <sup>*</sup> | b <sub>11</sub> <sup>*</sup> | b <sub>12</sub> <sup>*</sup> | b <sub>13</sub> <sup>*</sup> |                |                |                |   |



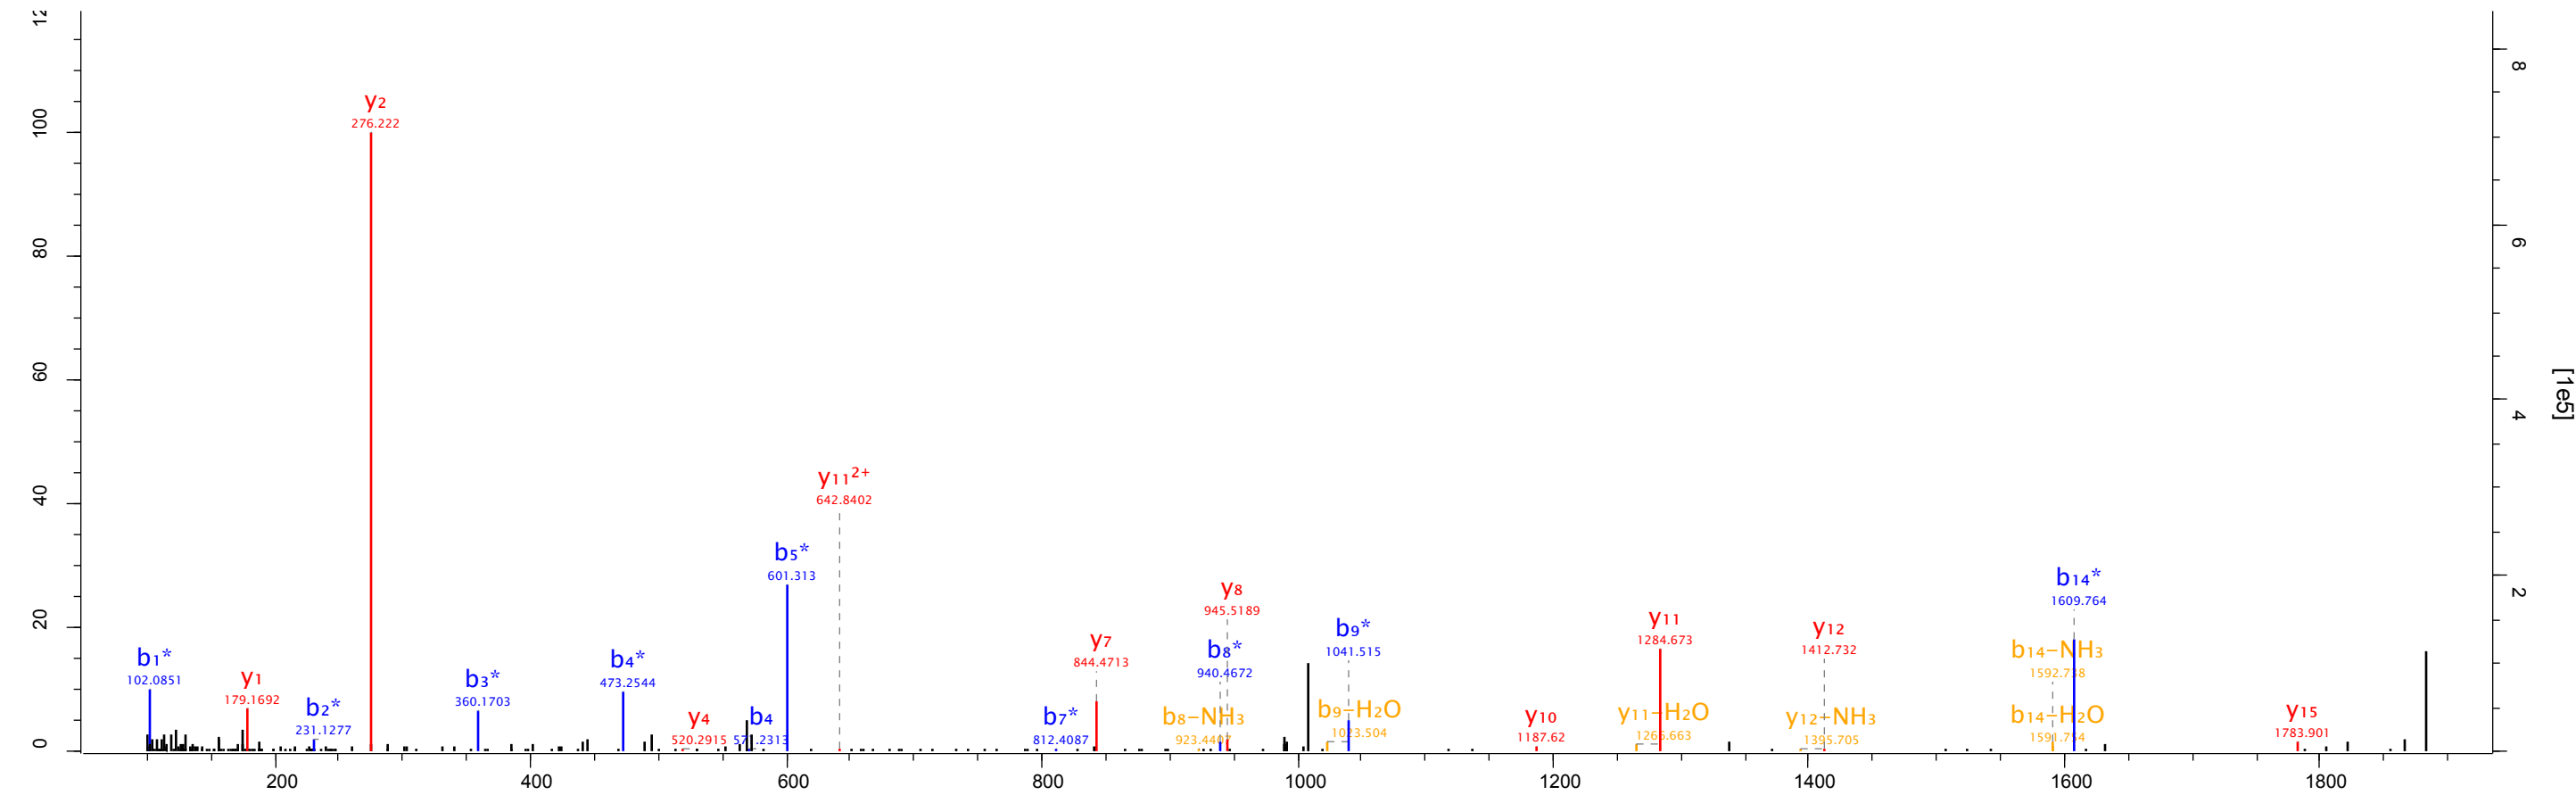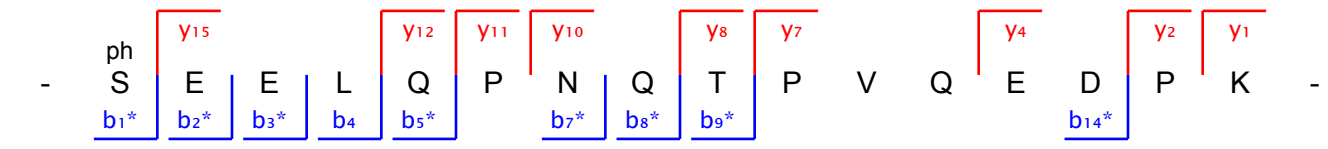

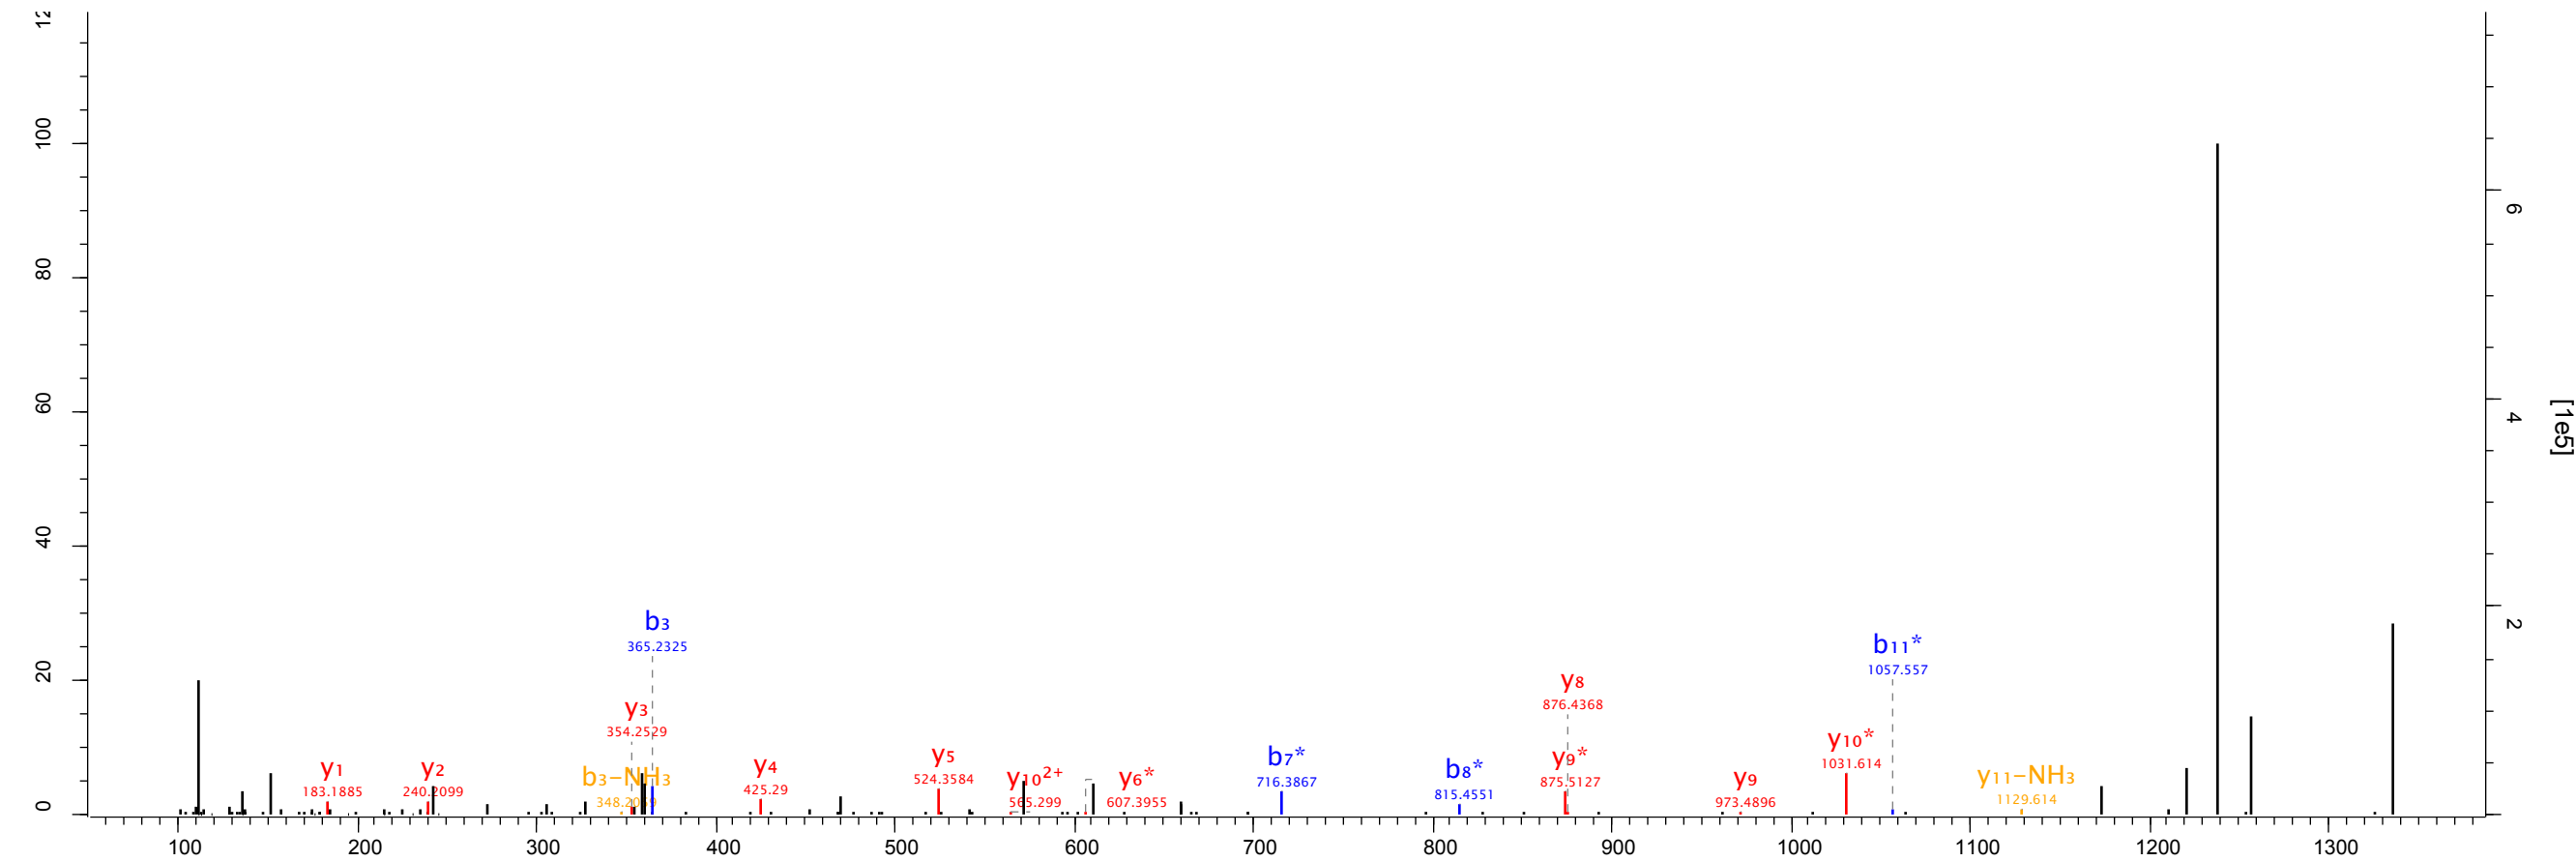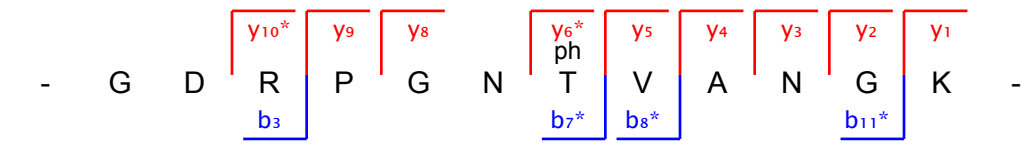

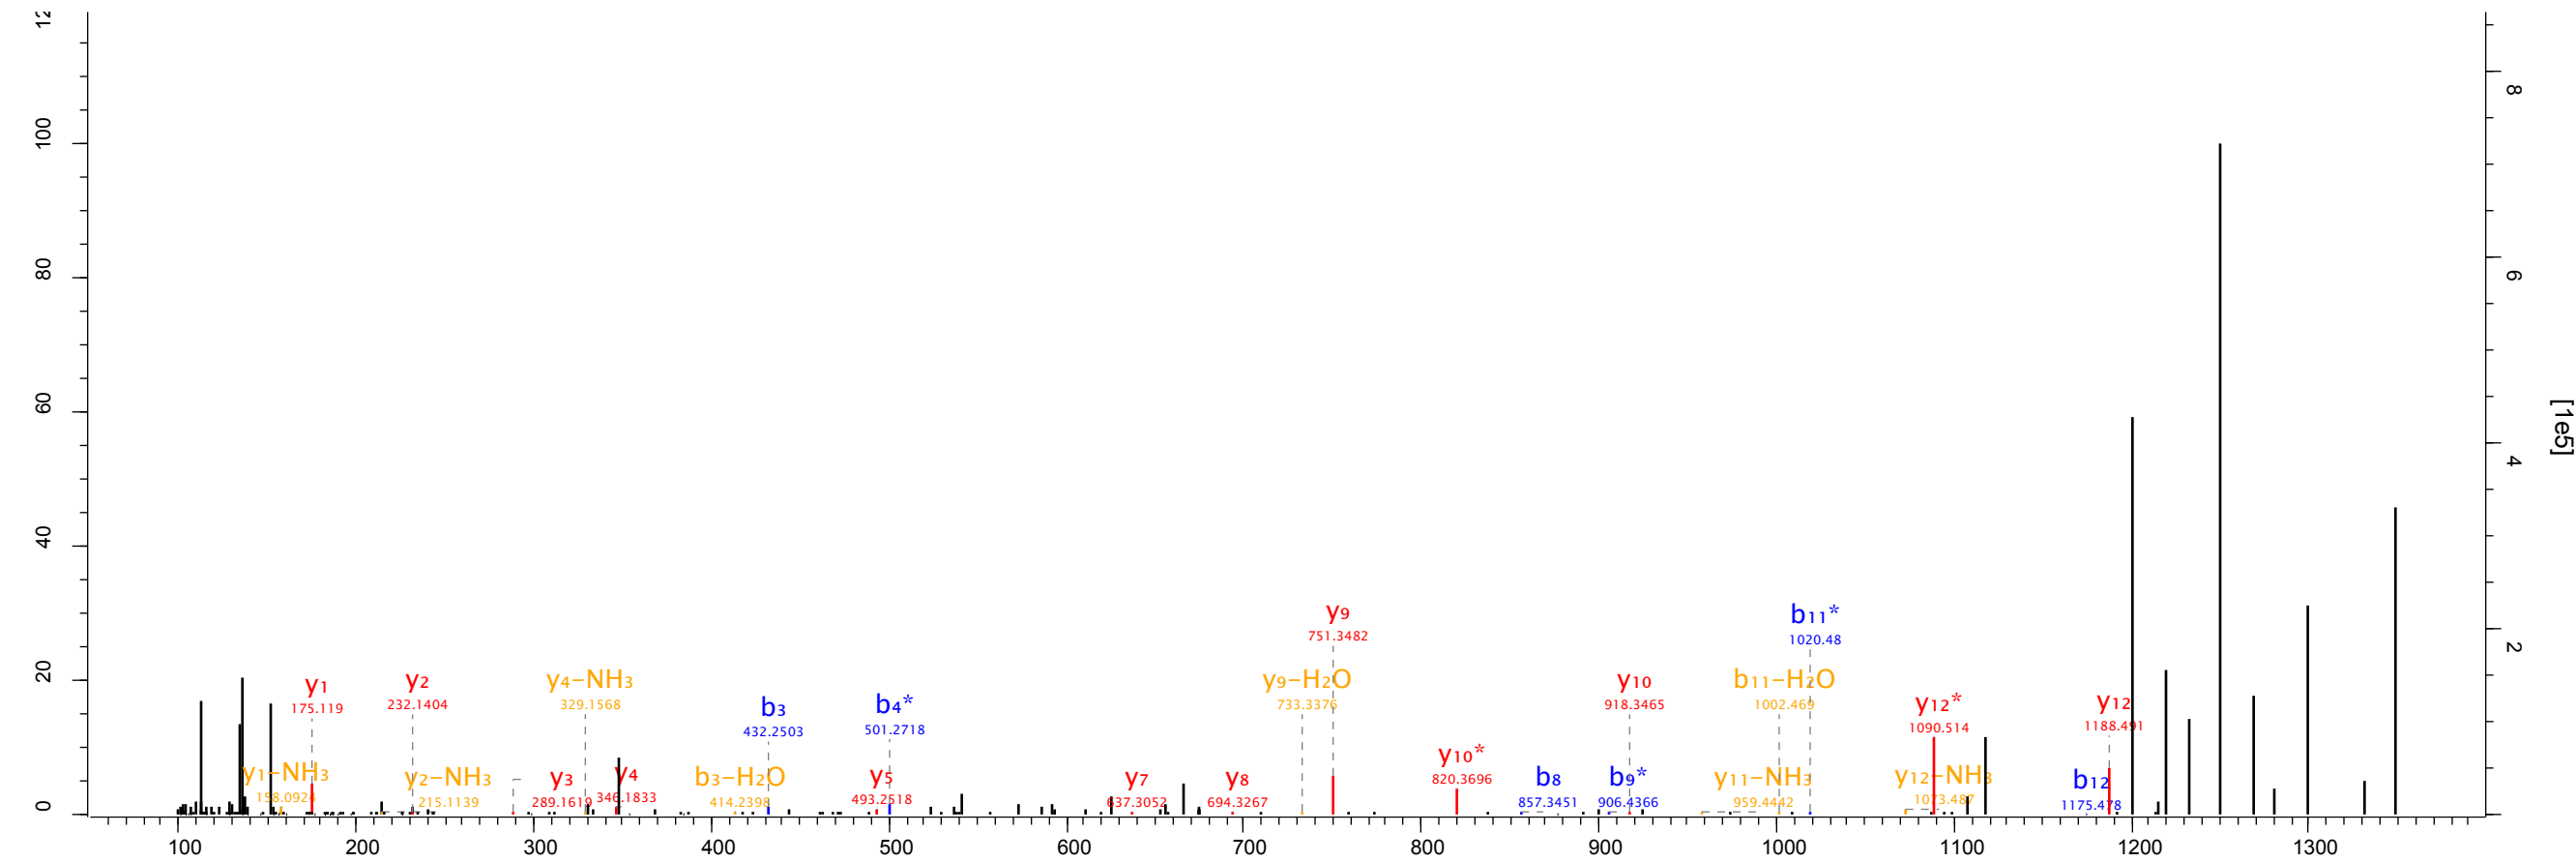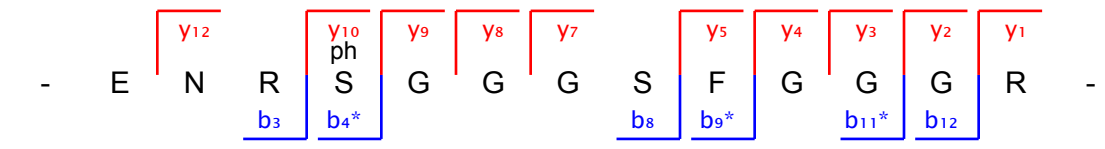

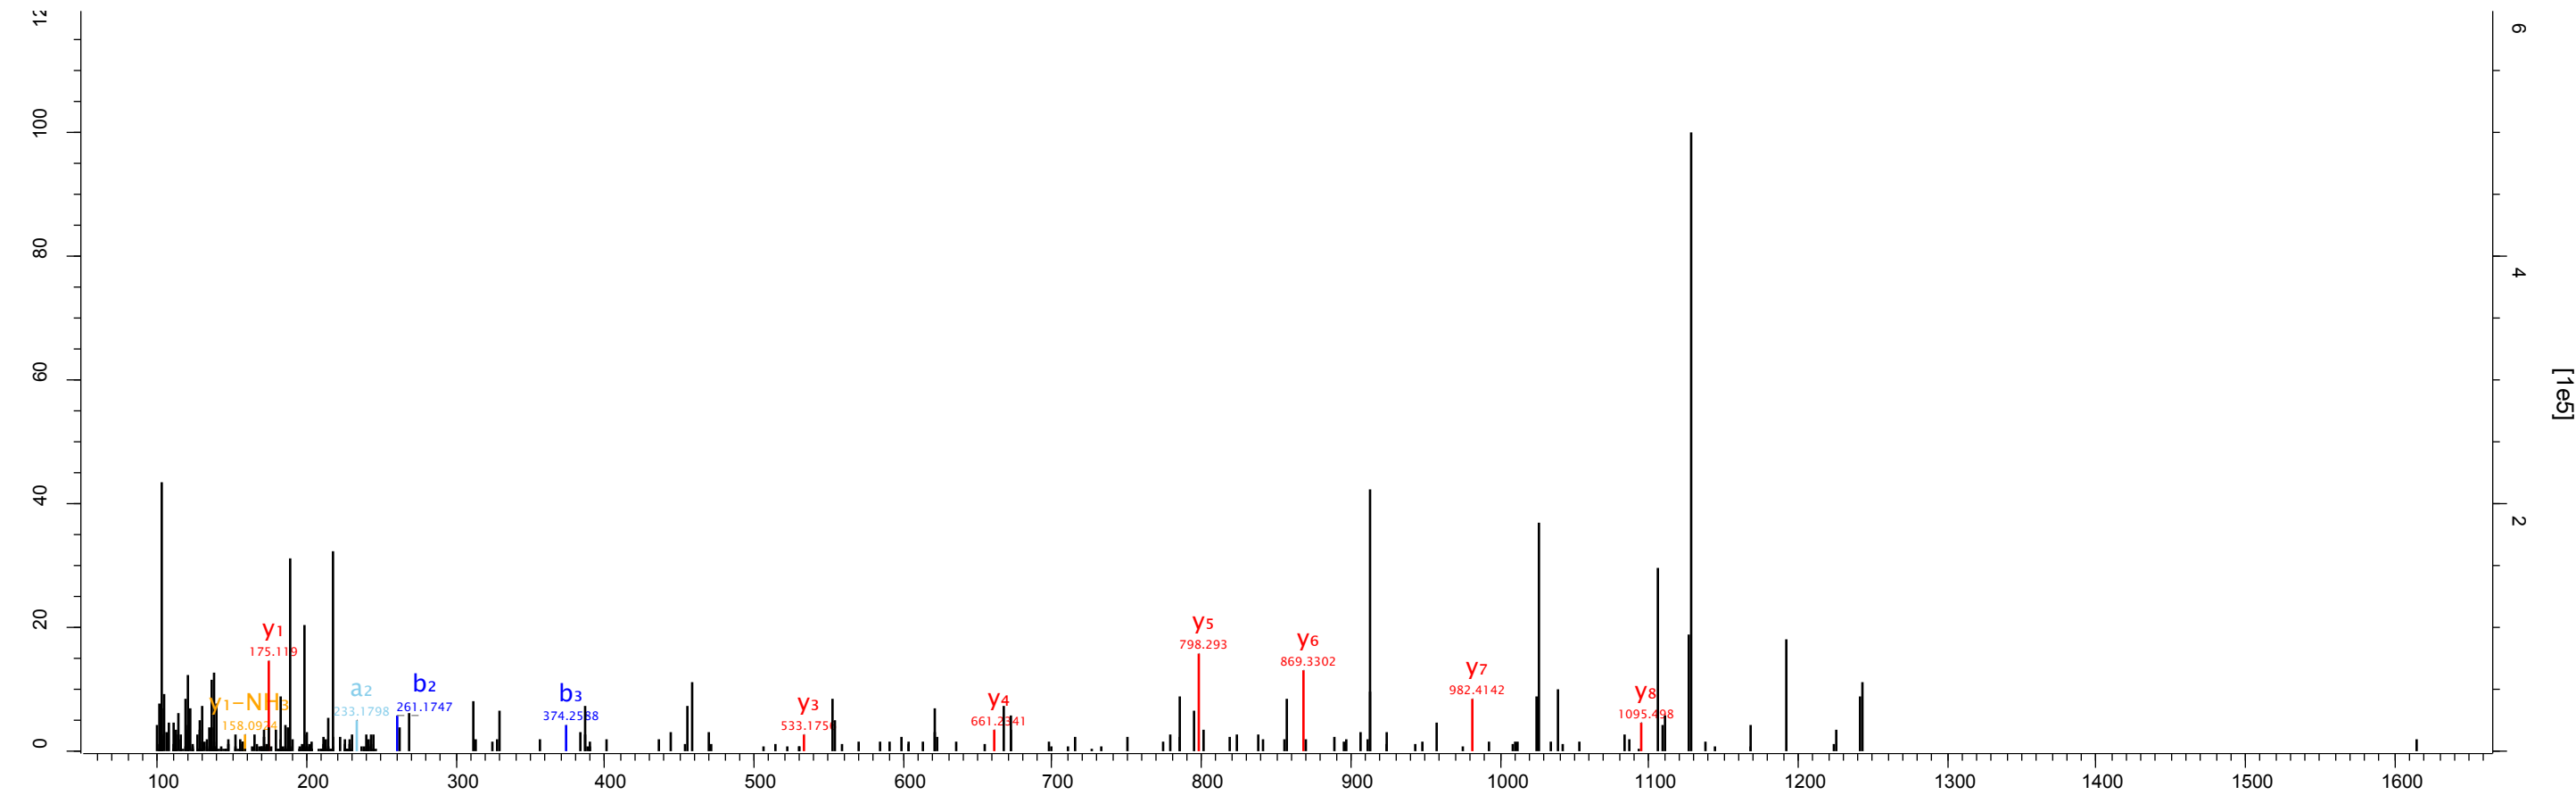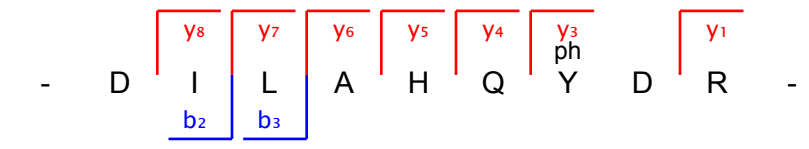

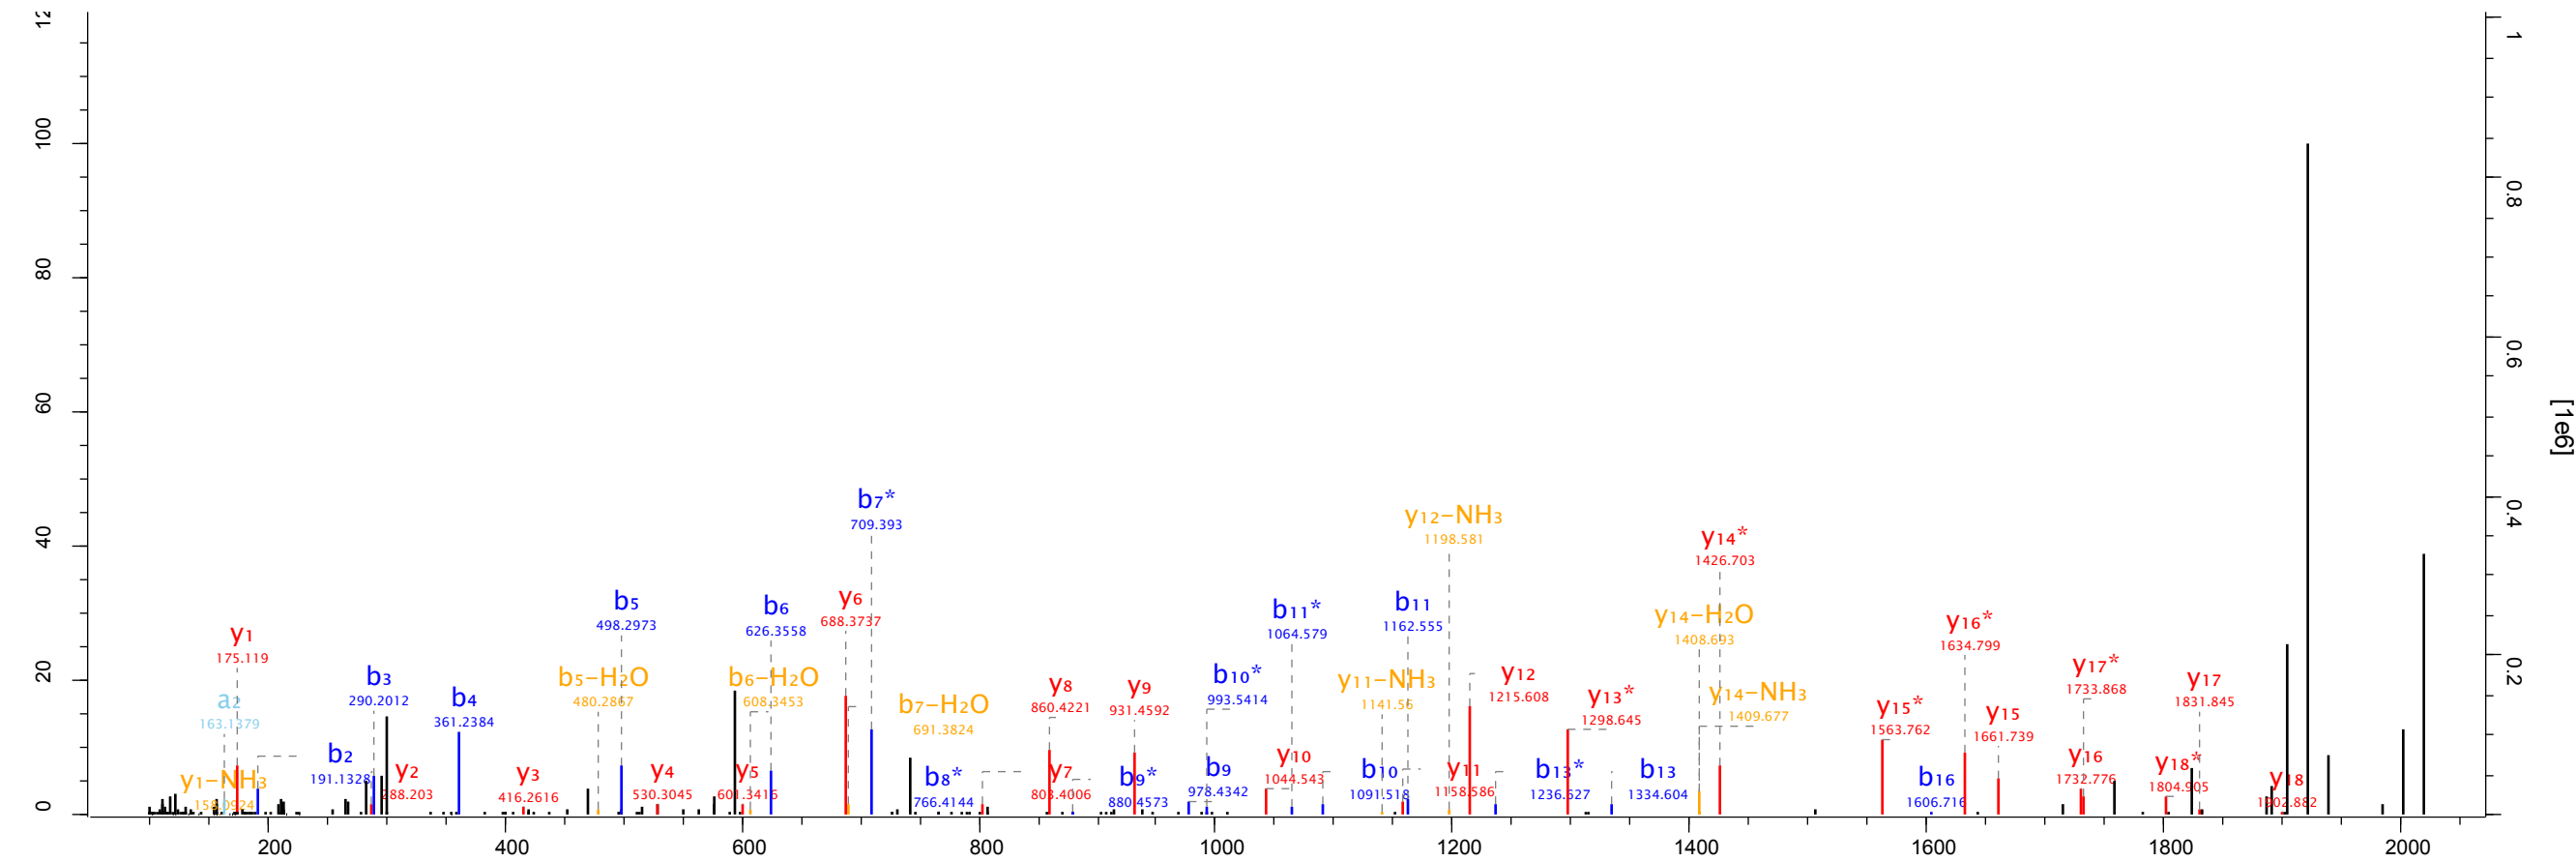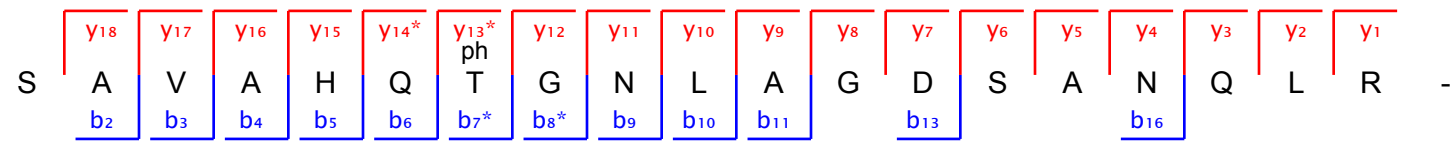

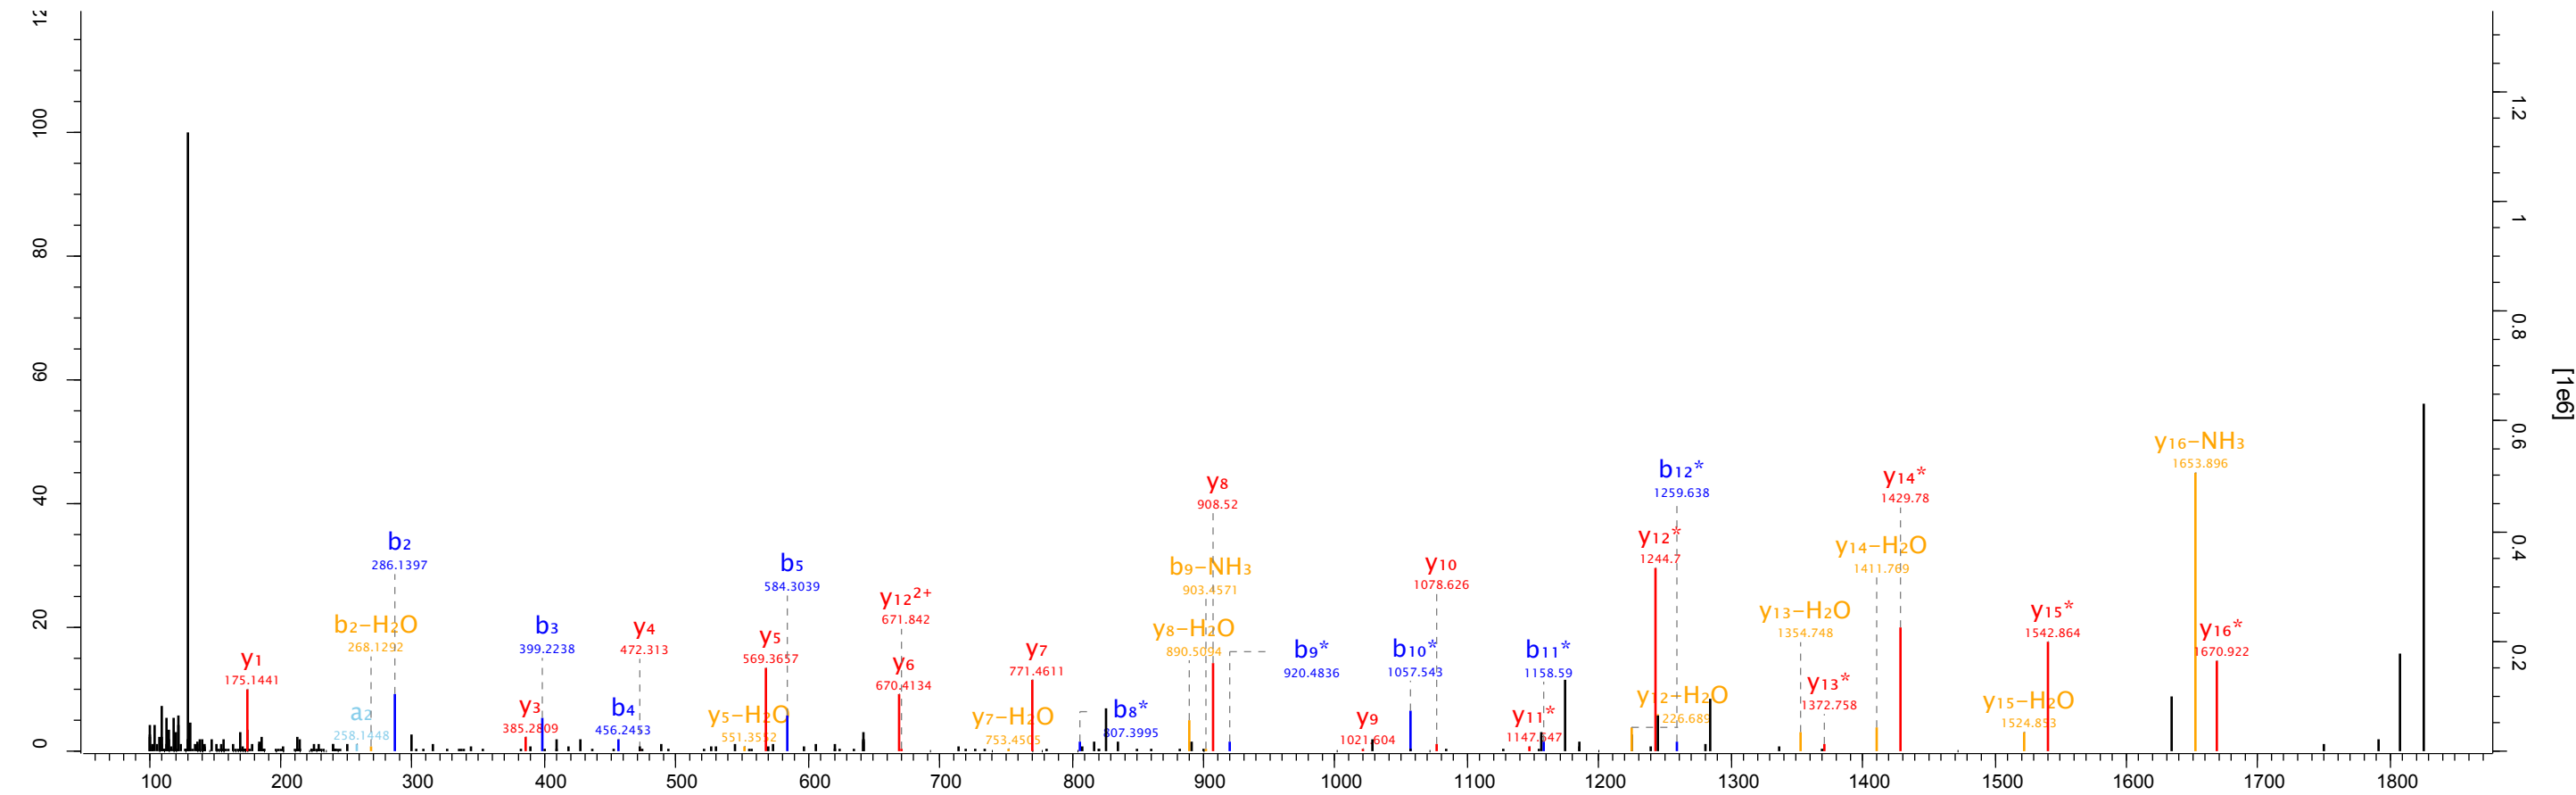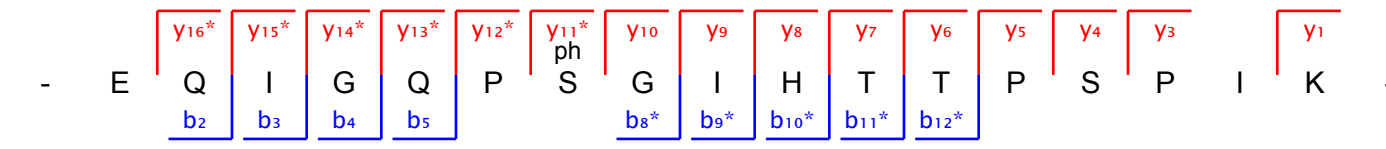

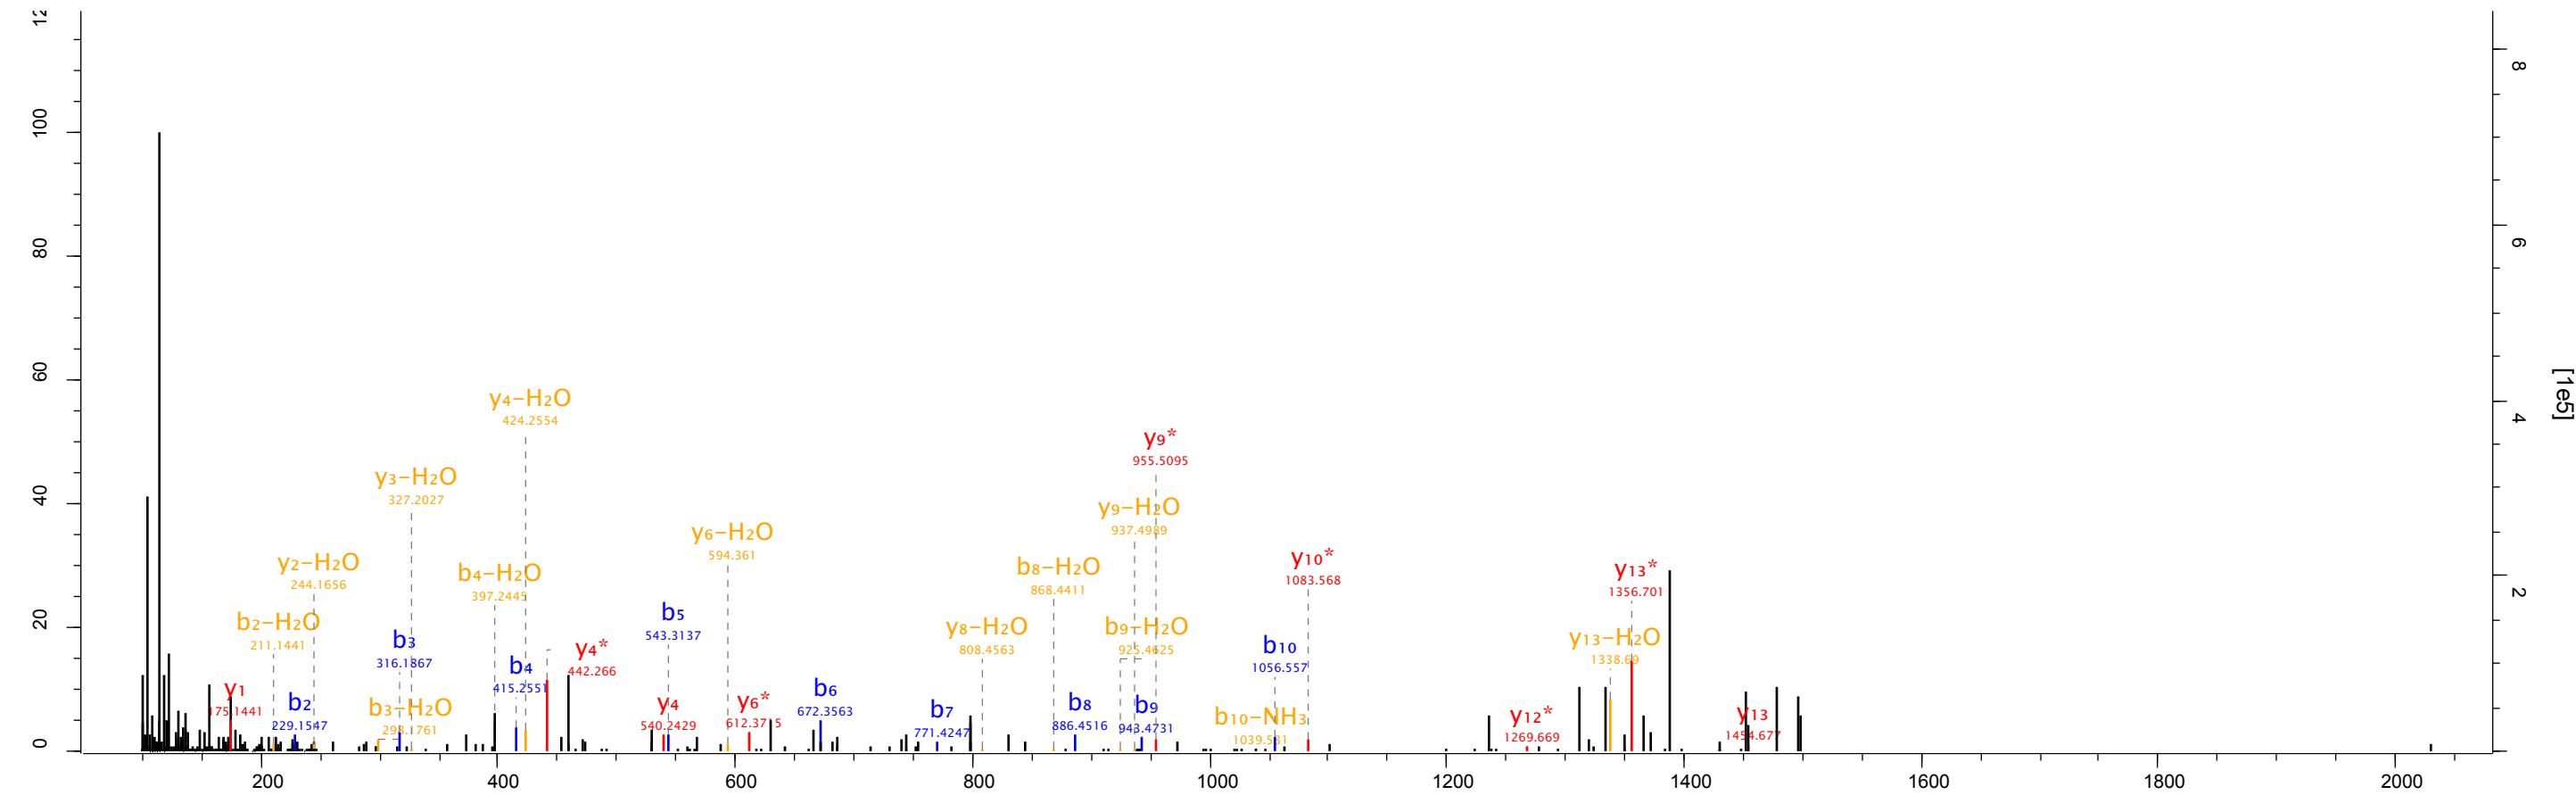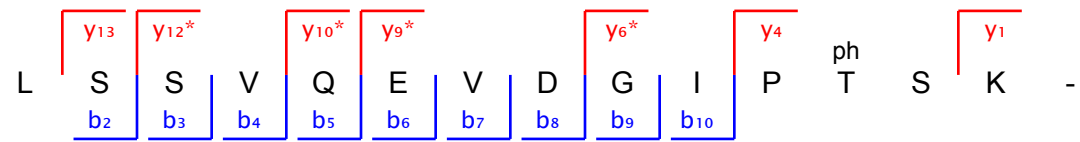

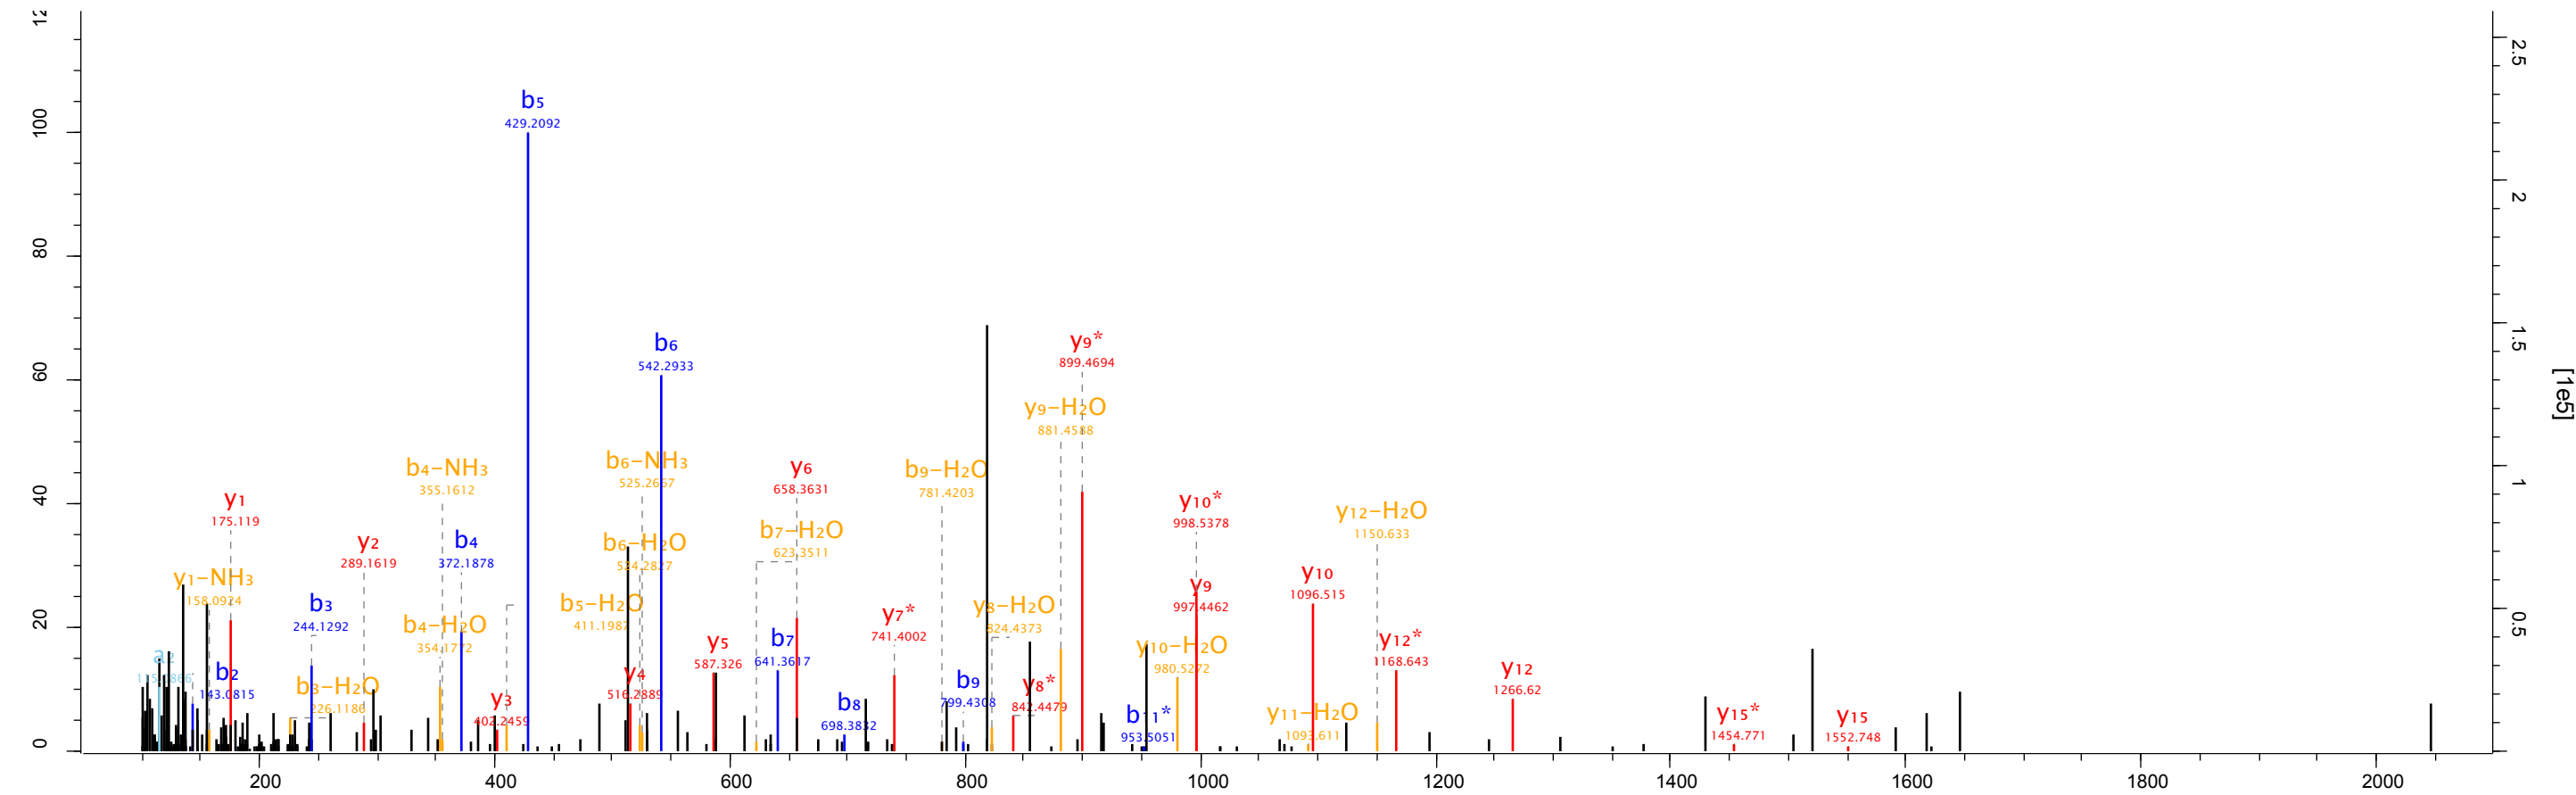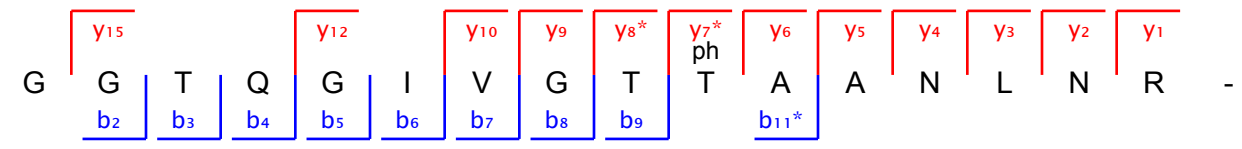



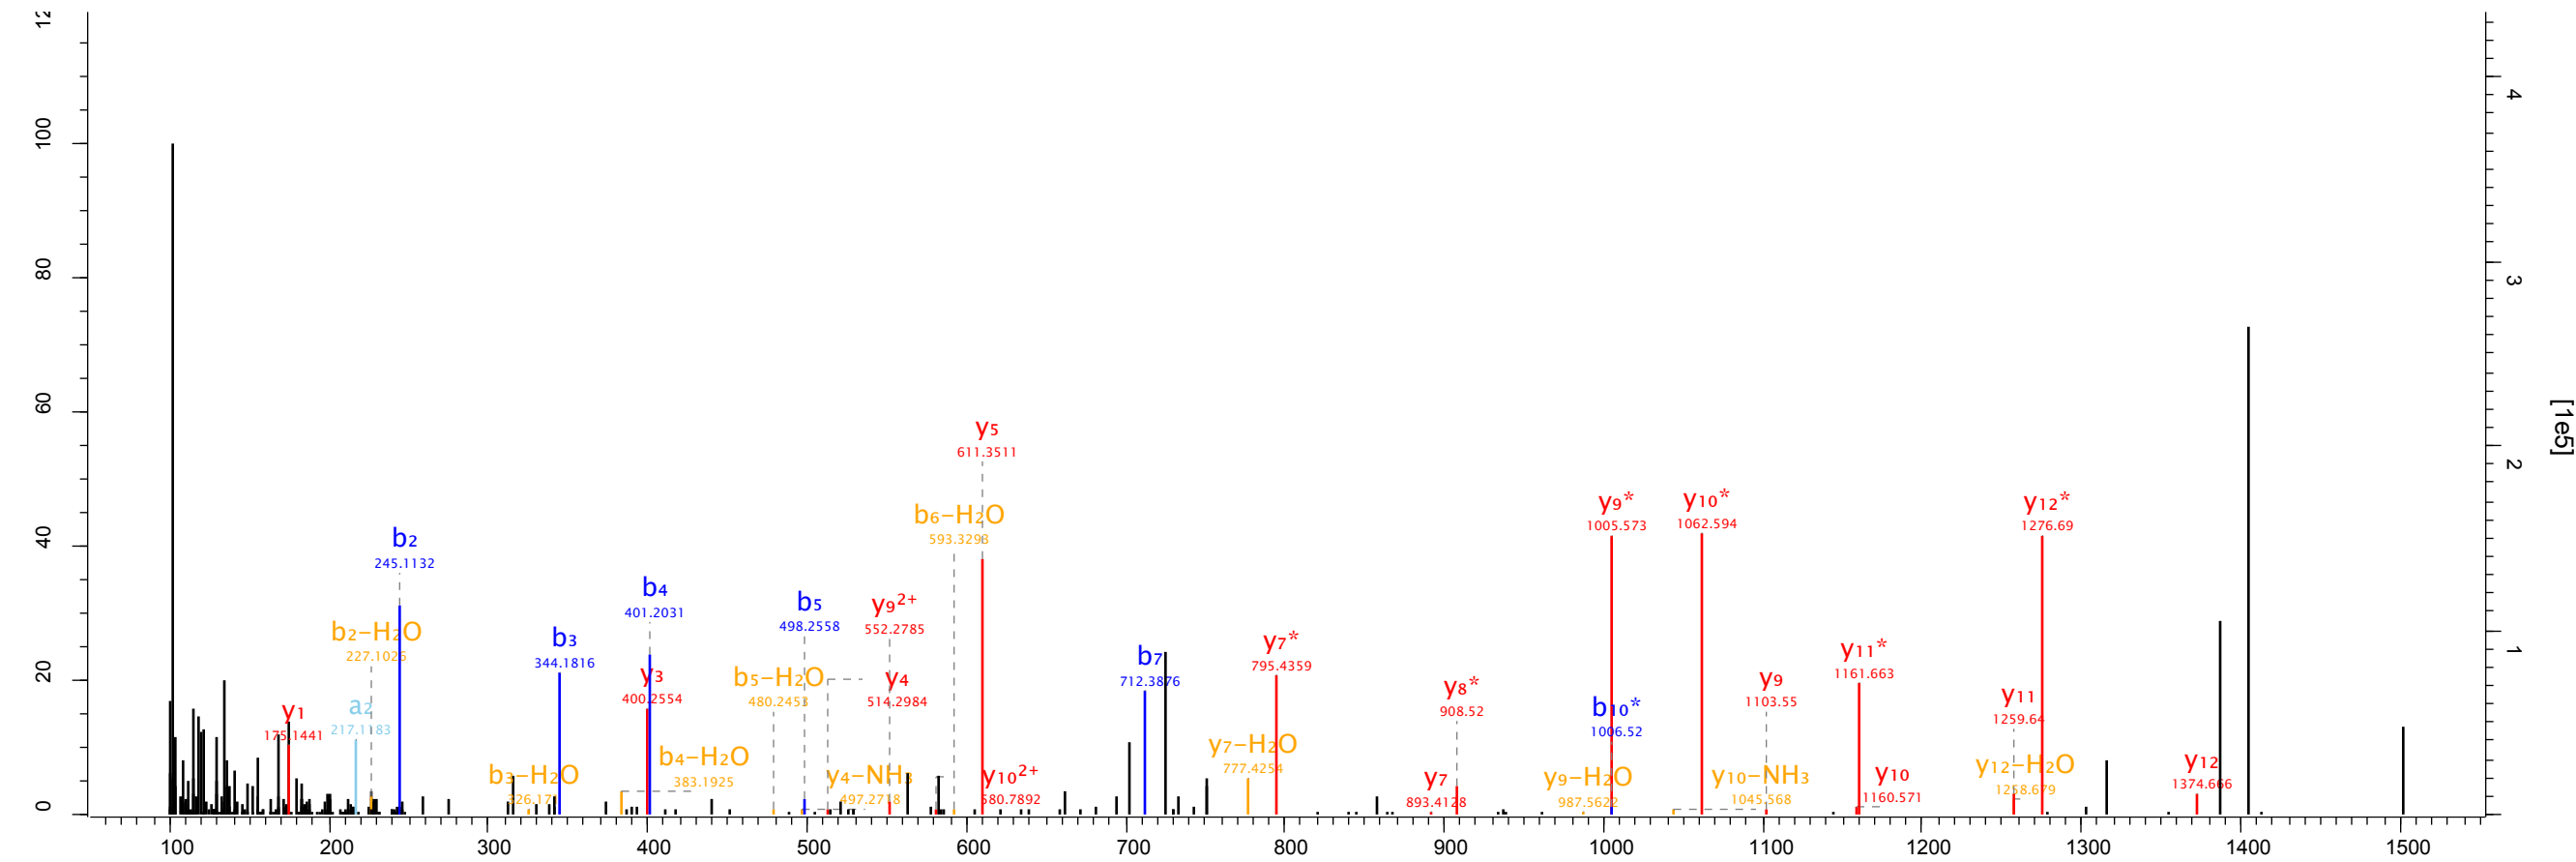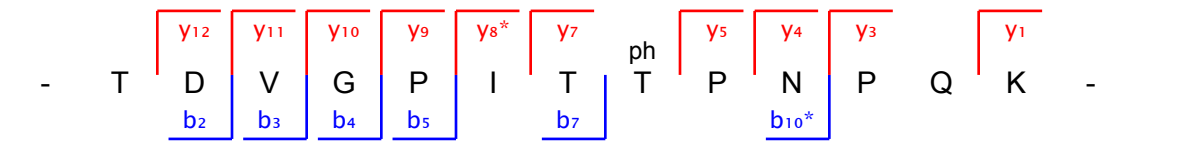

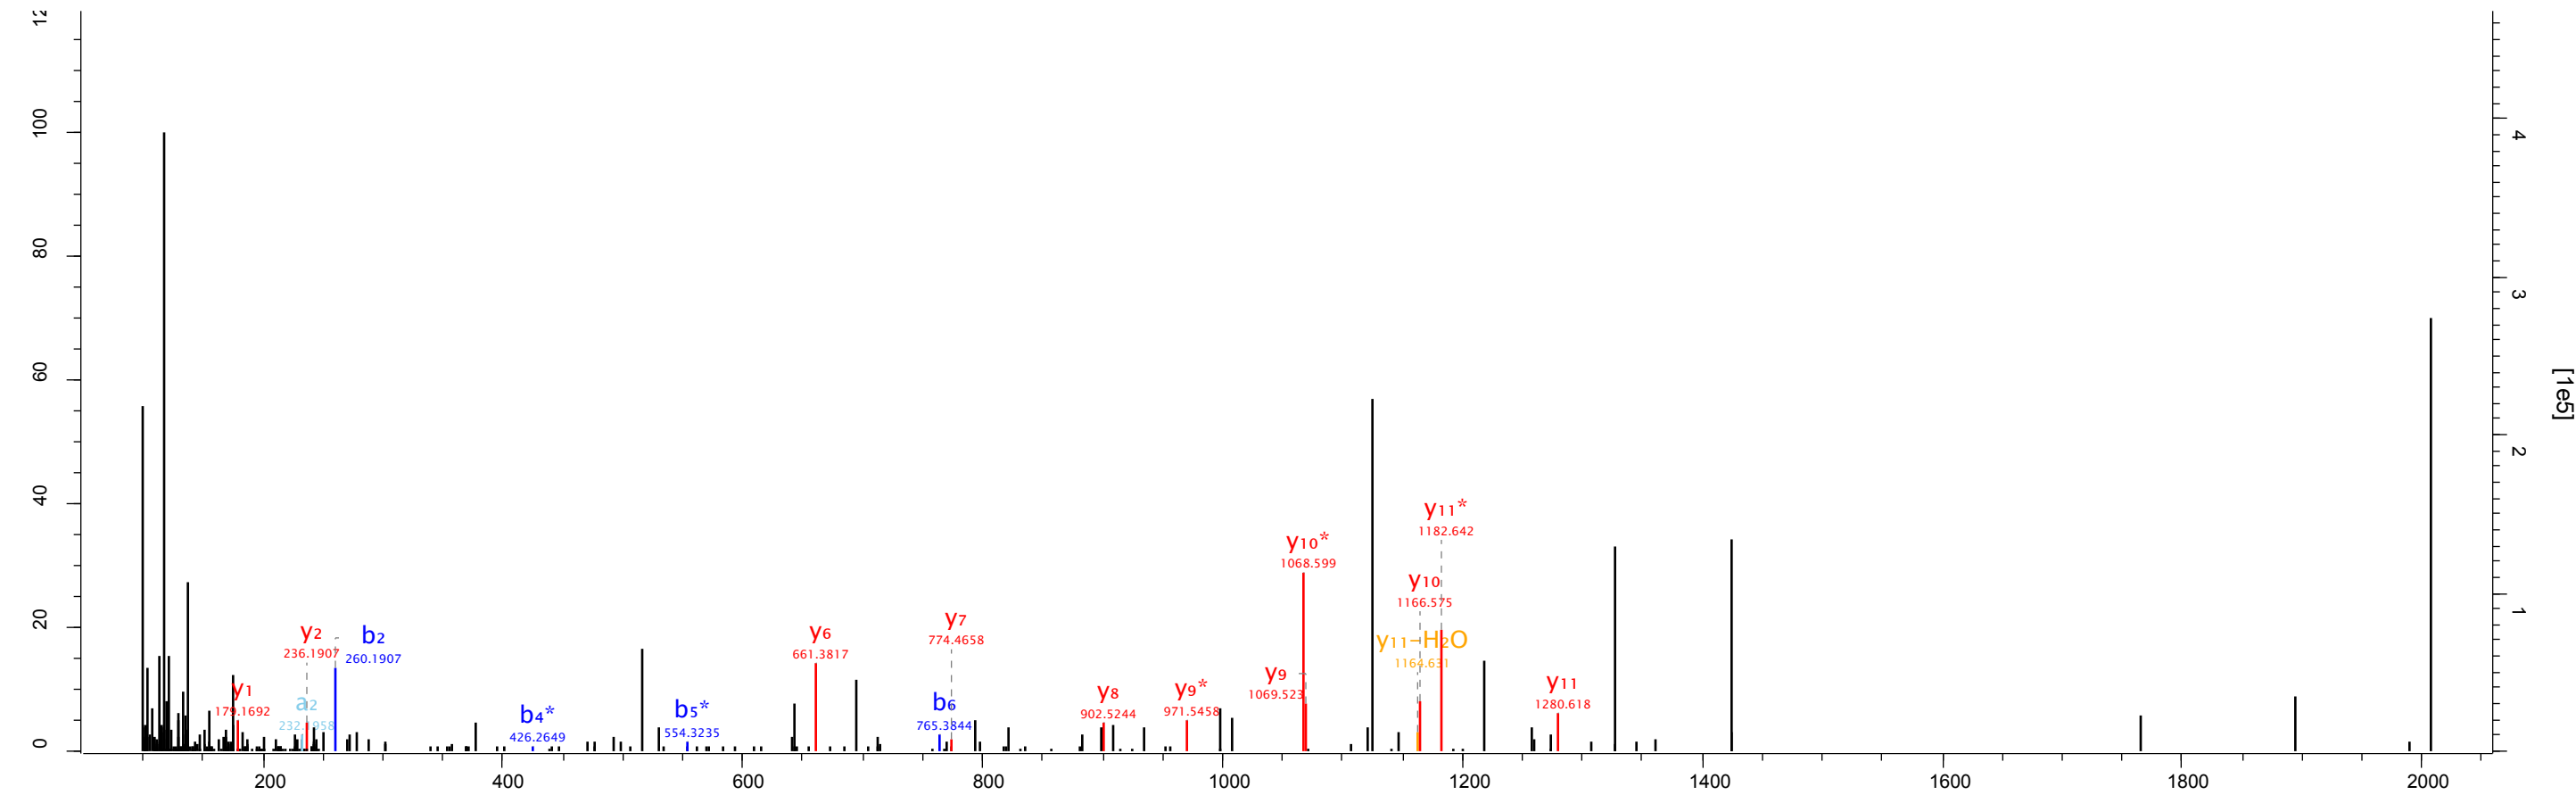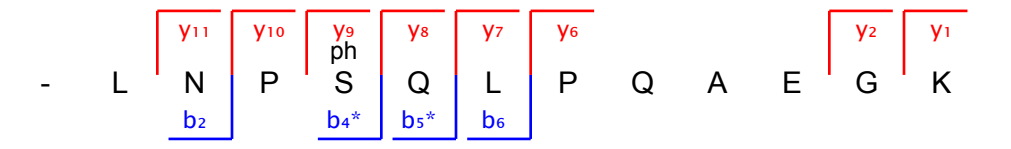



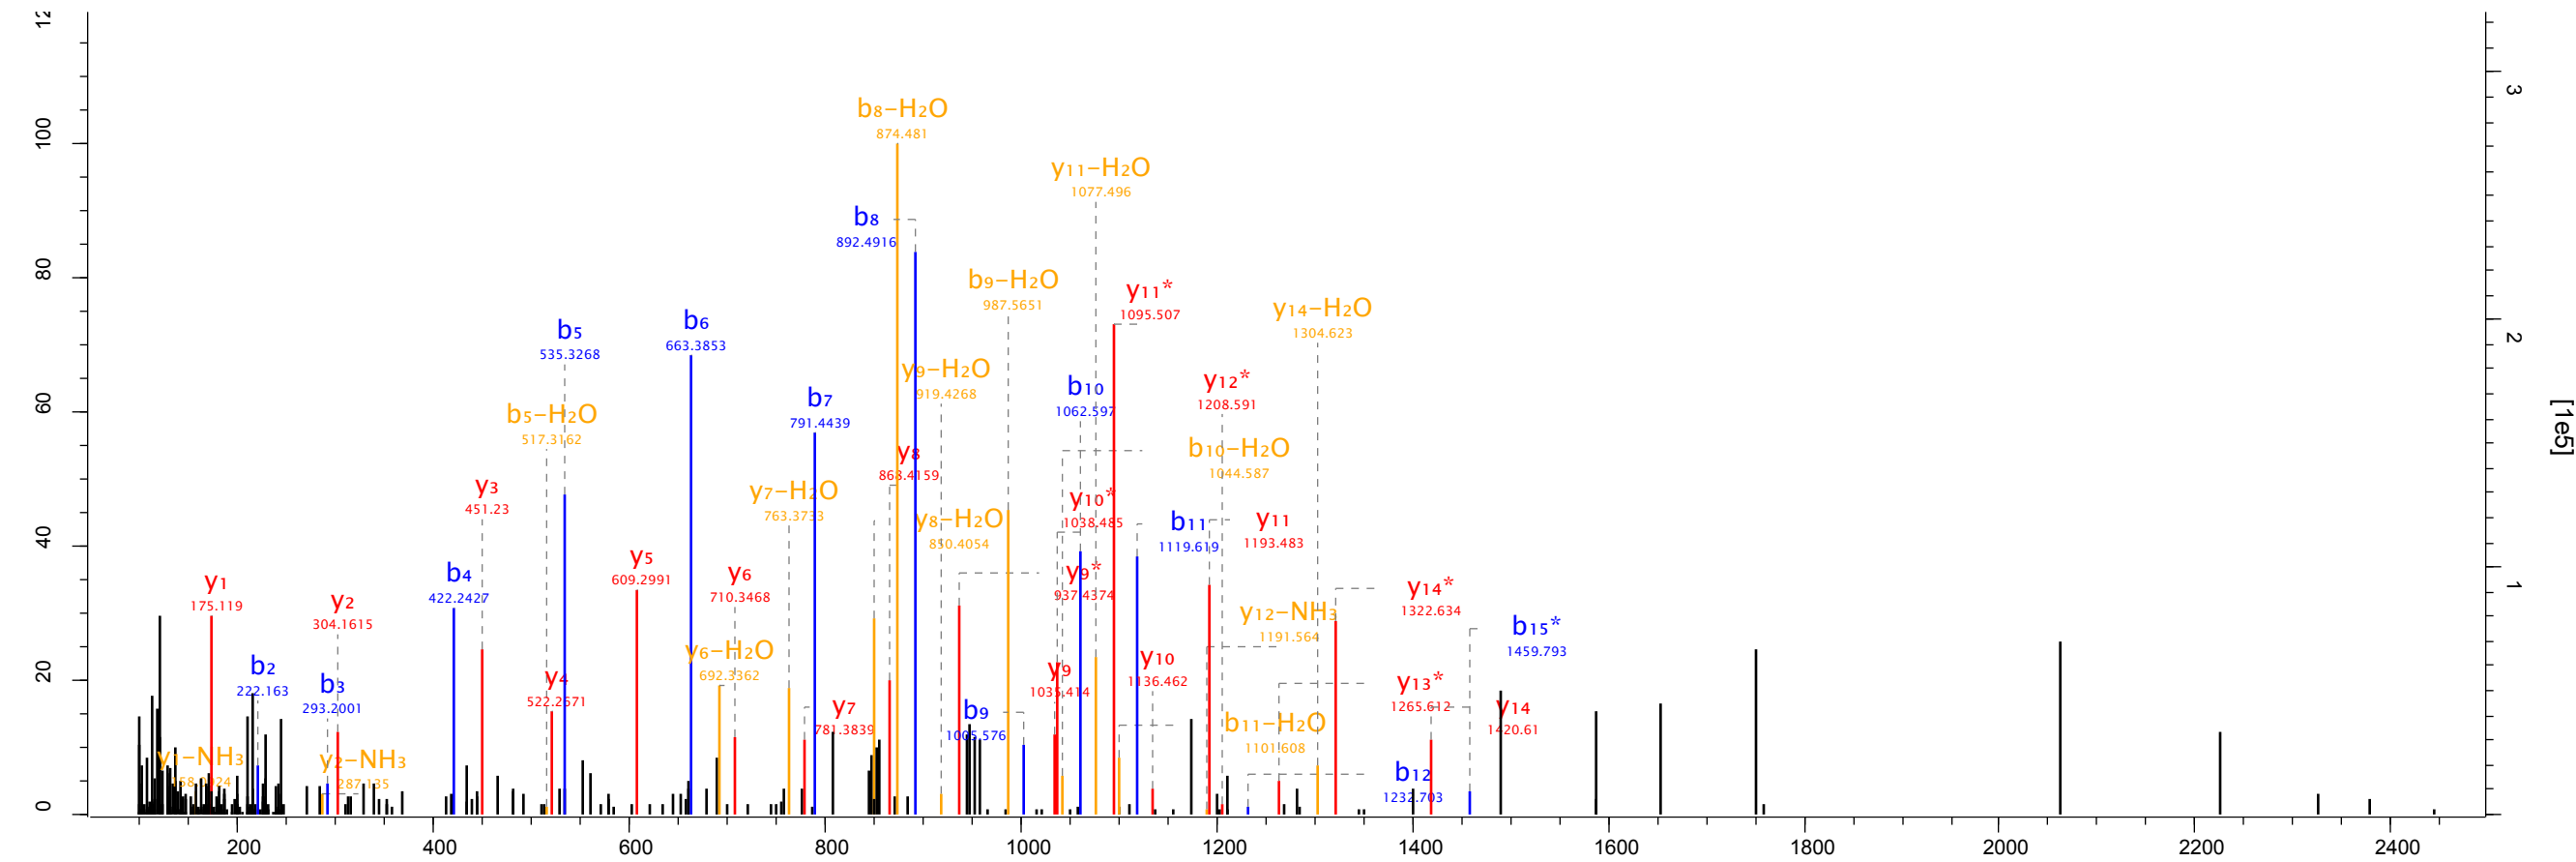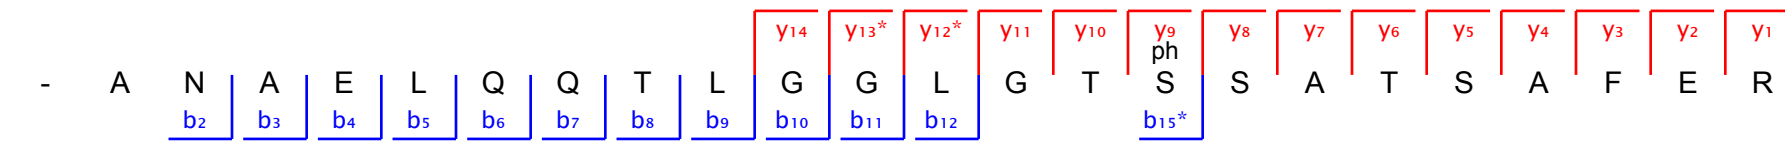



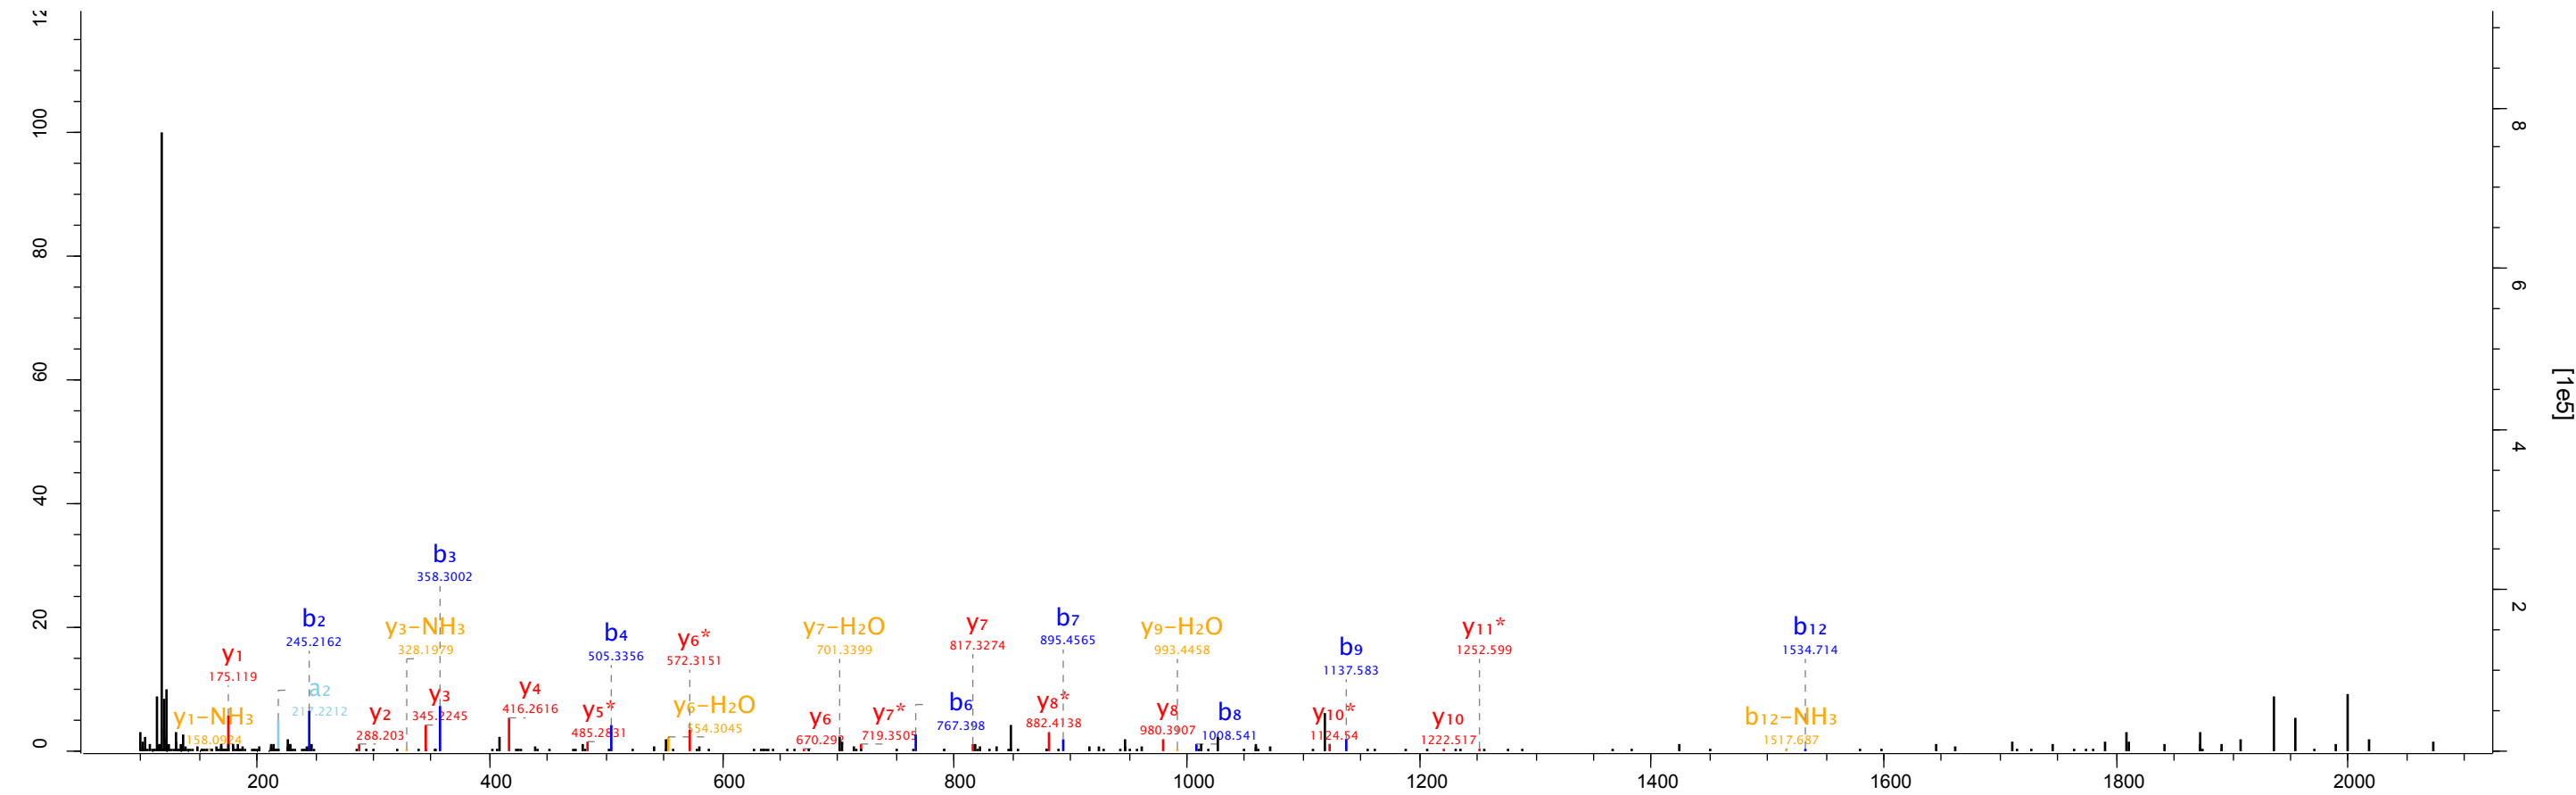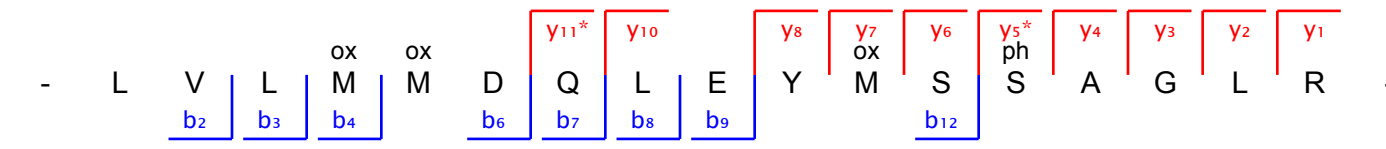



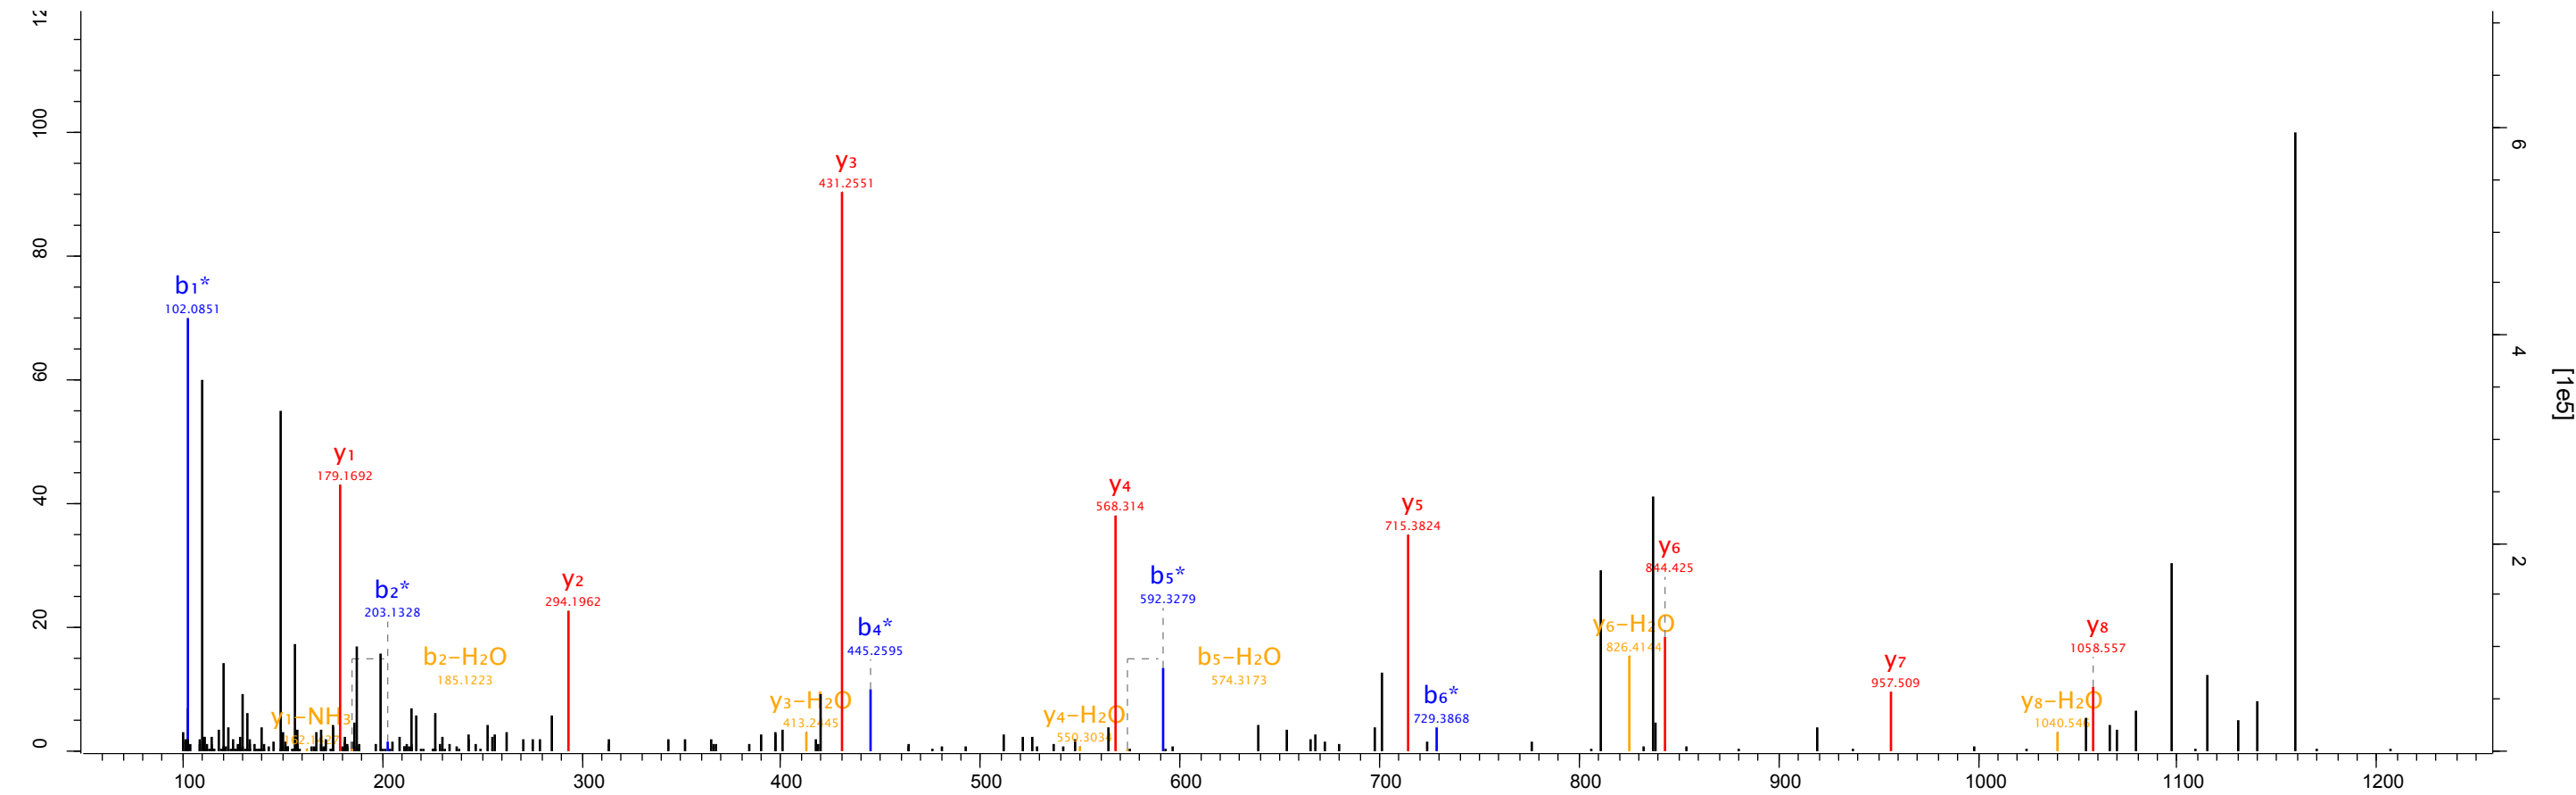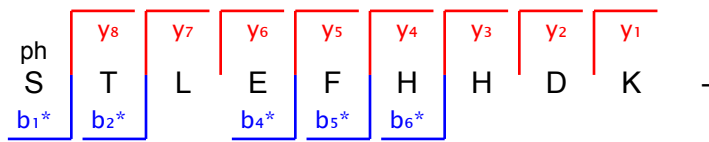



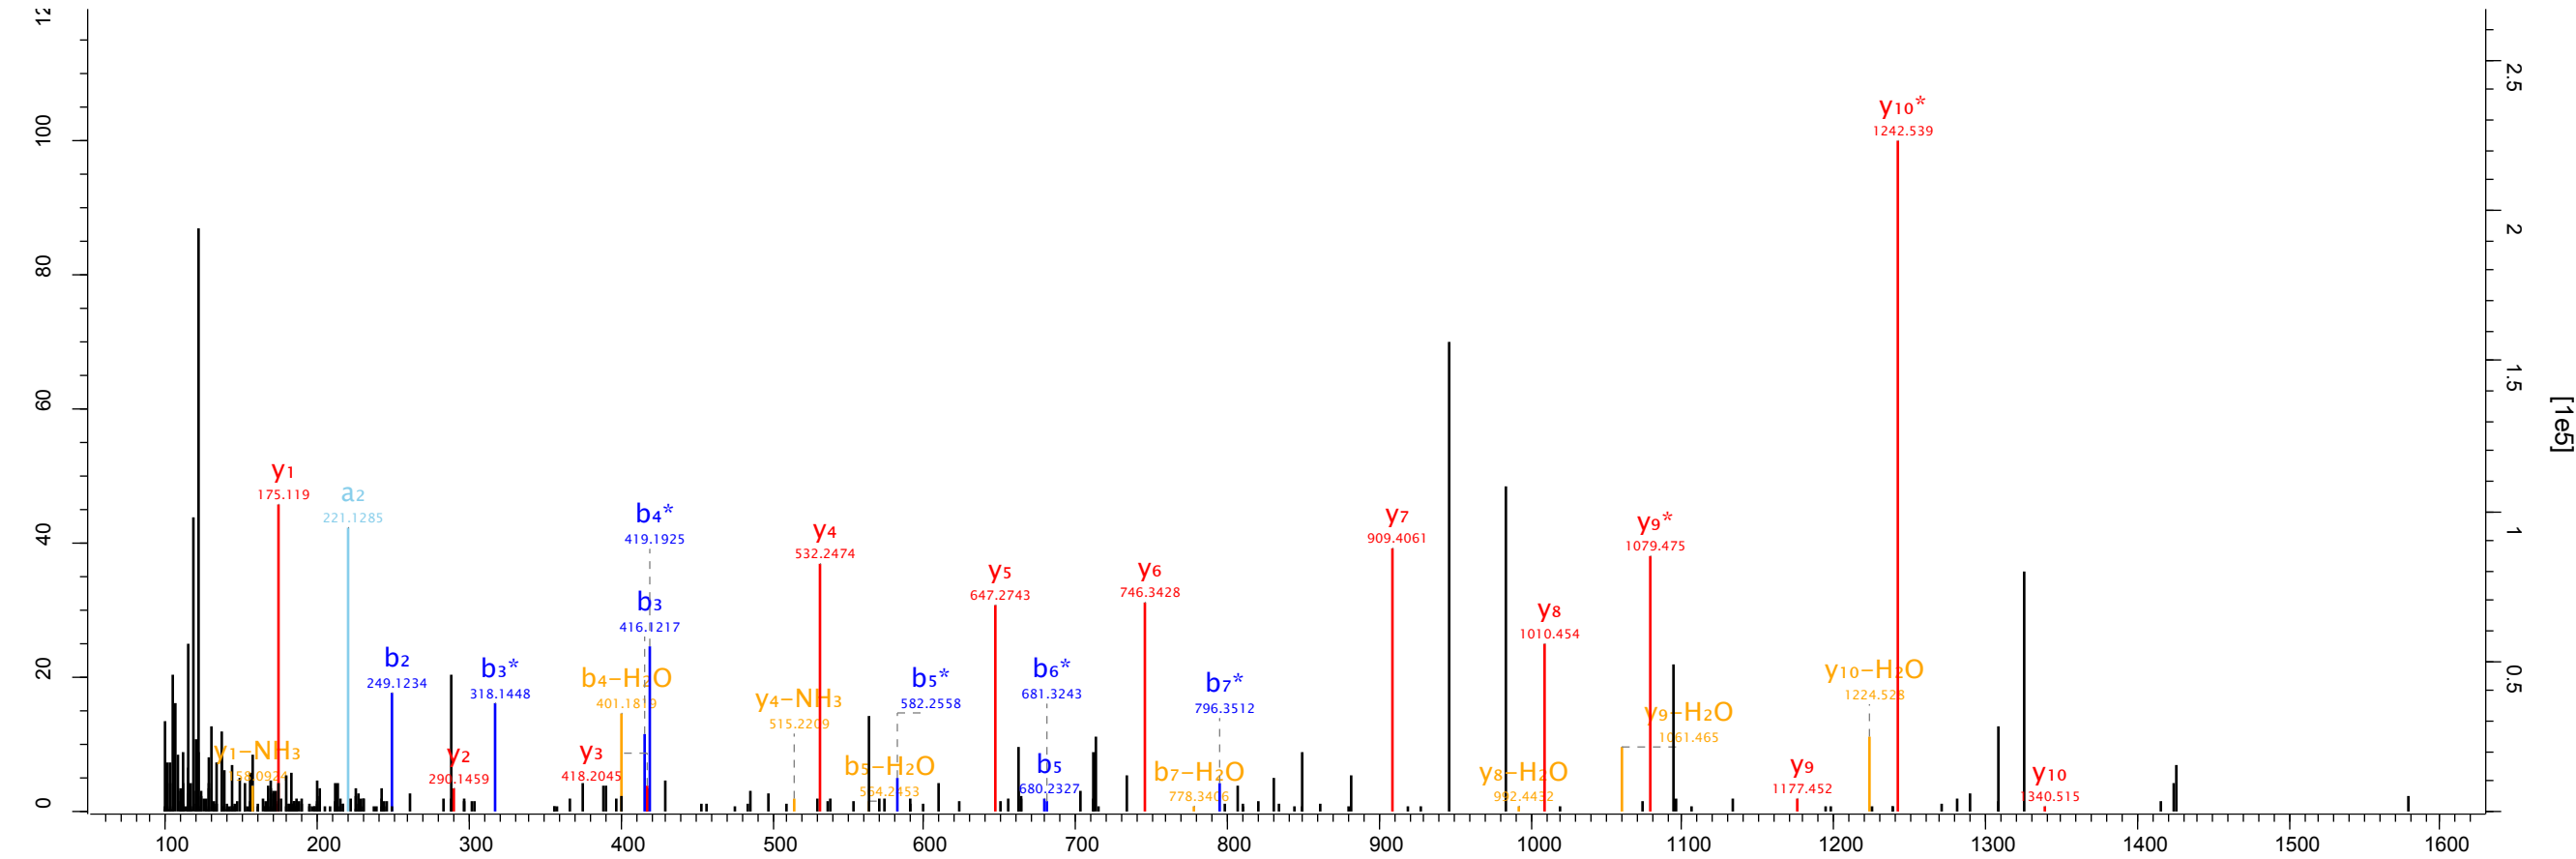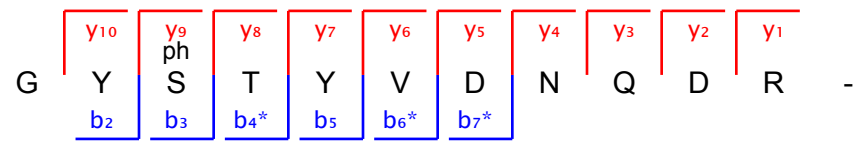

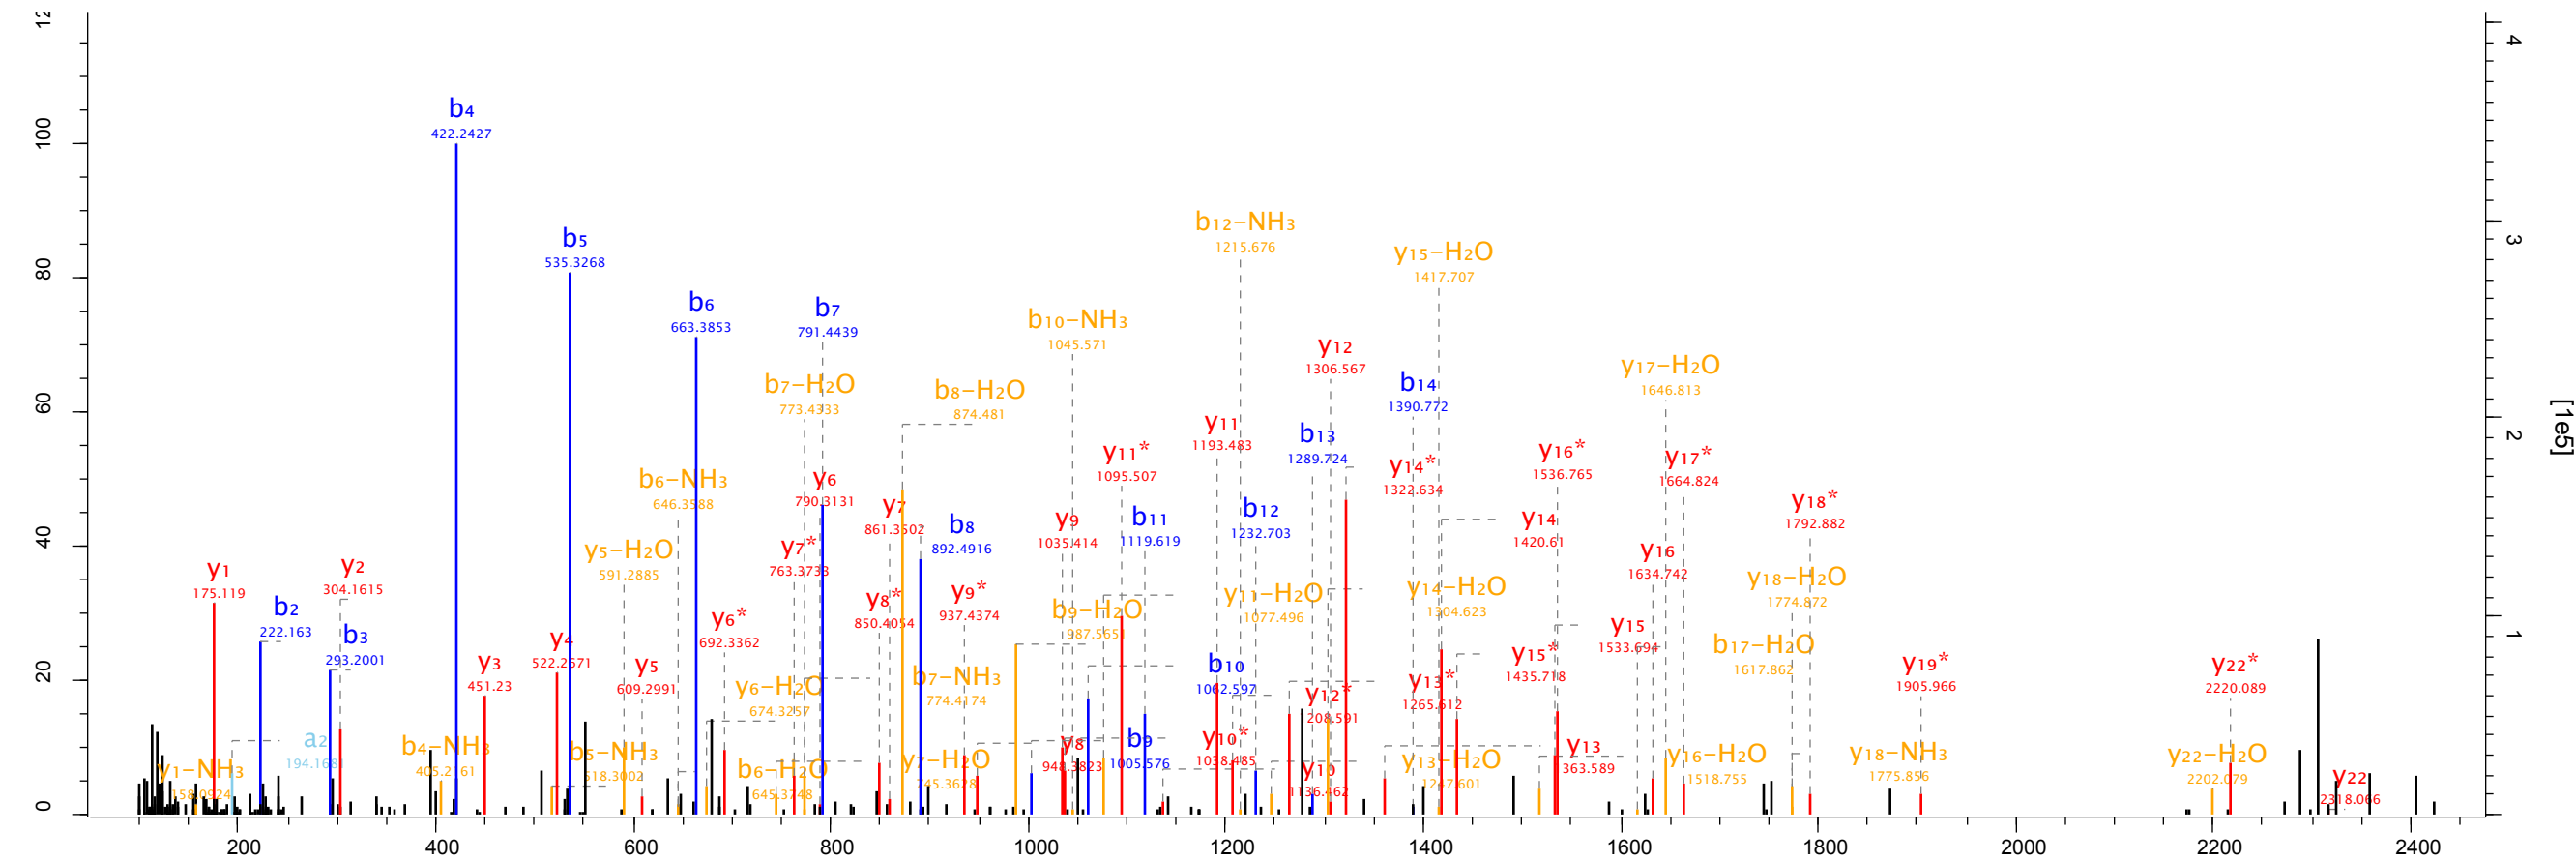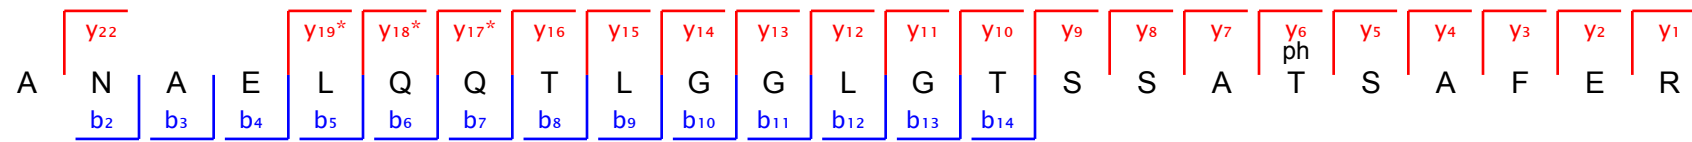

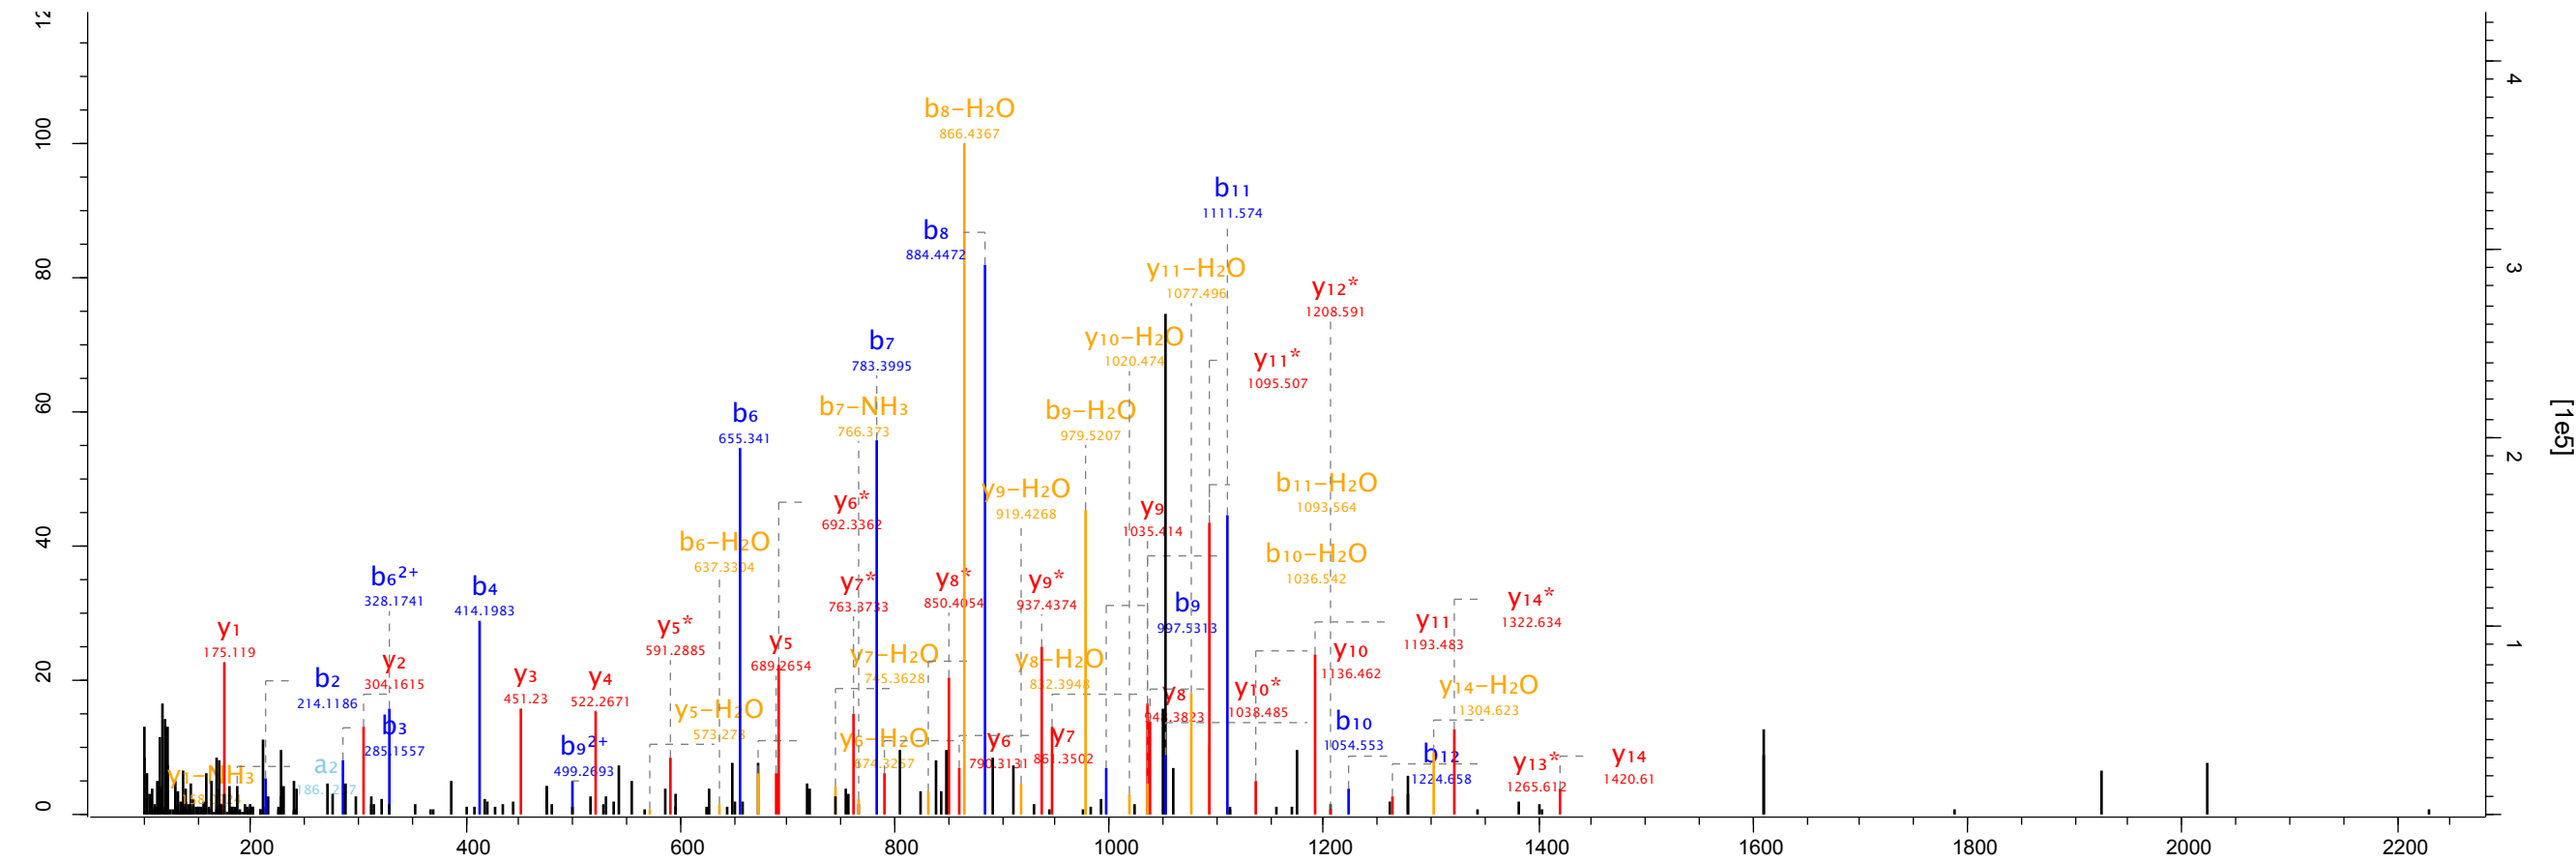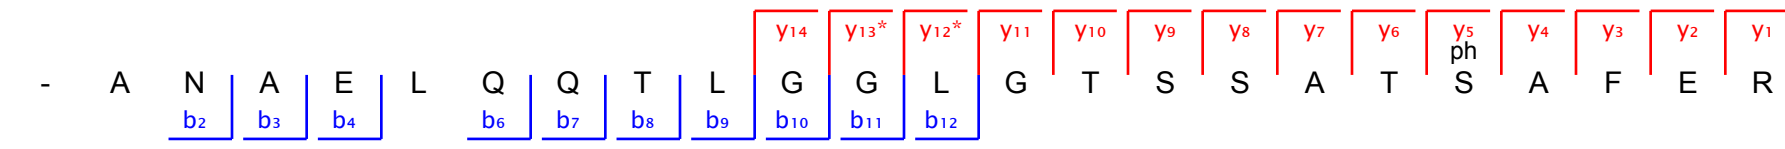

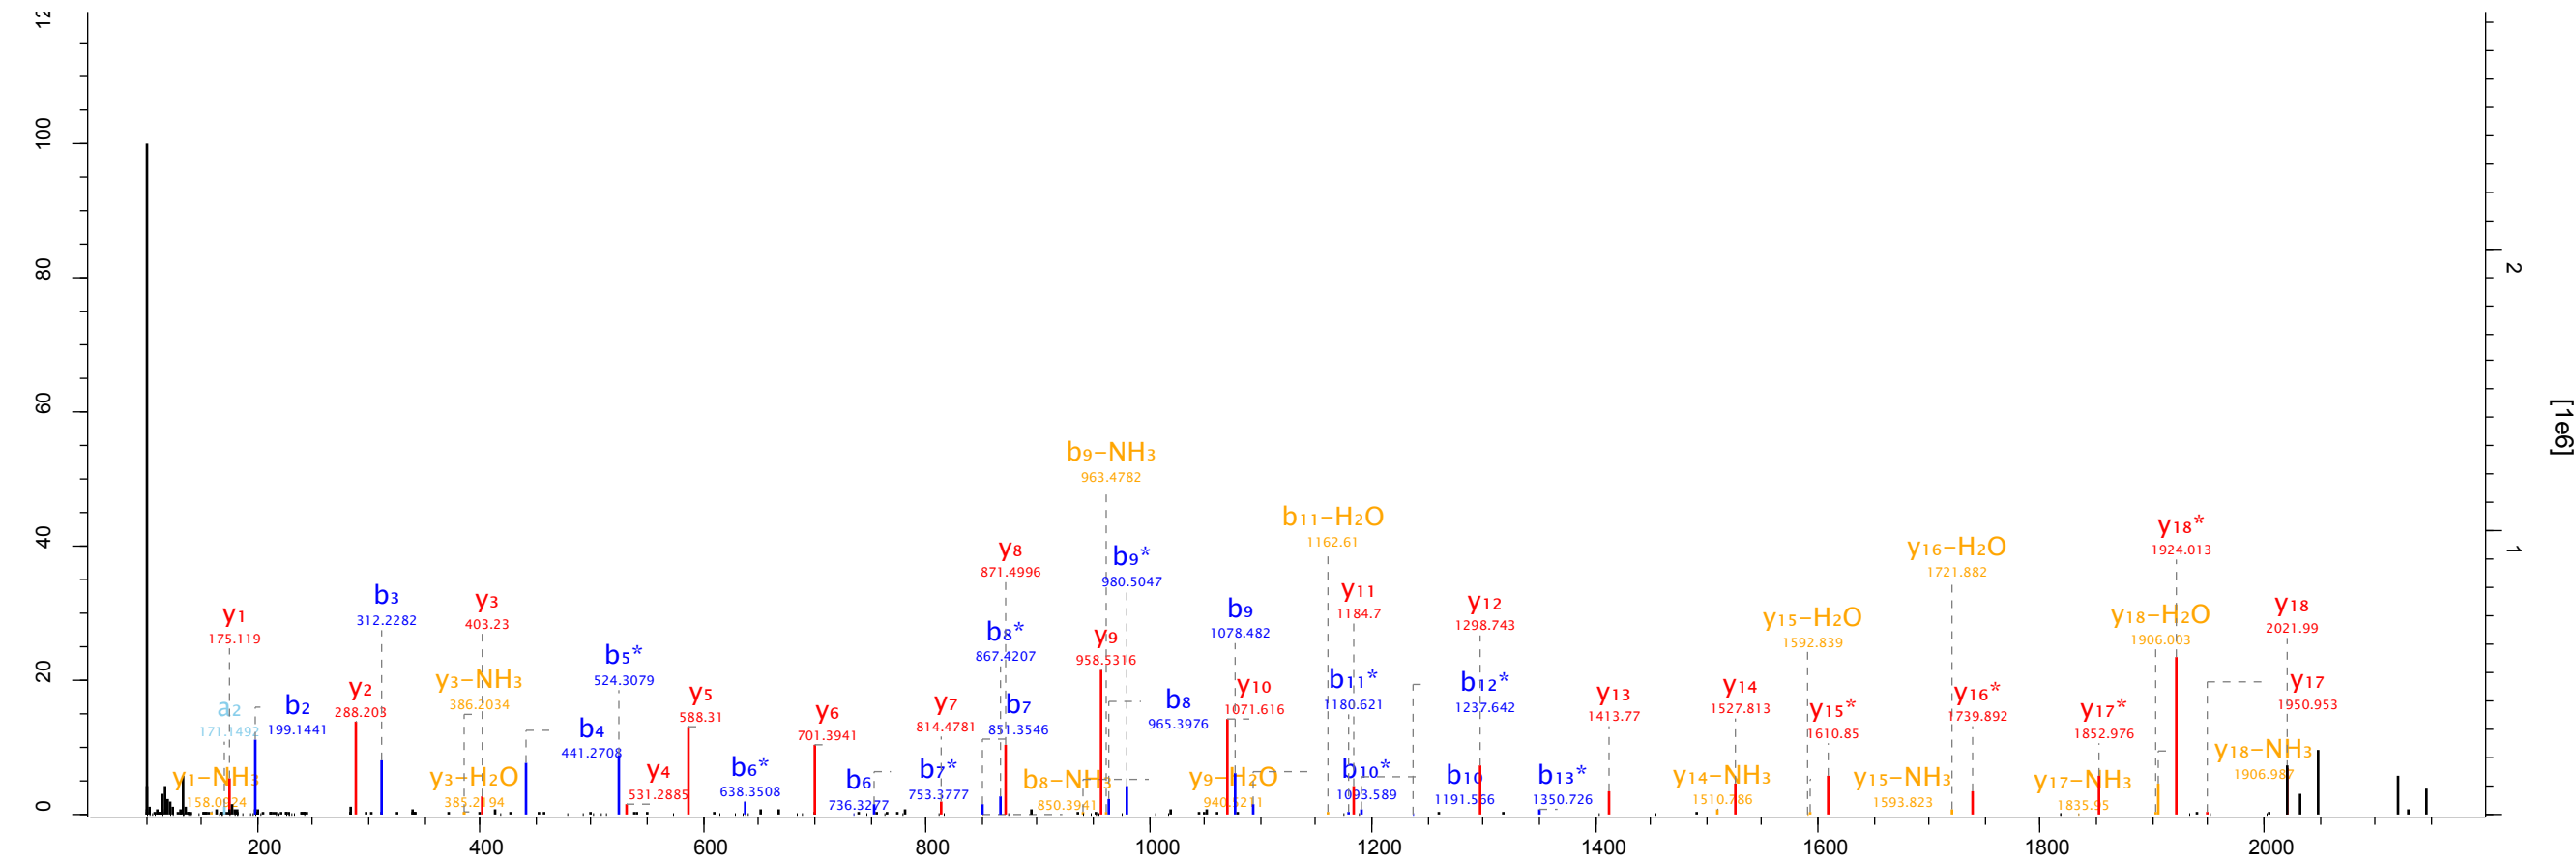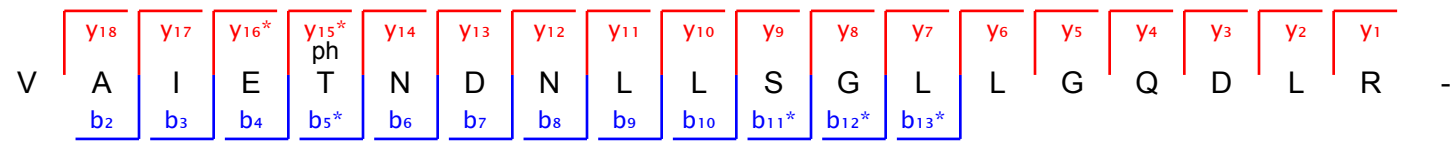

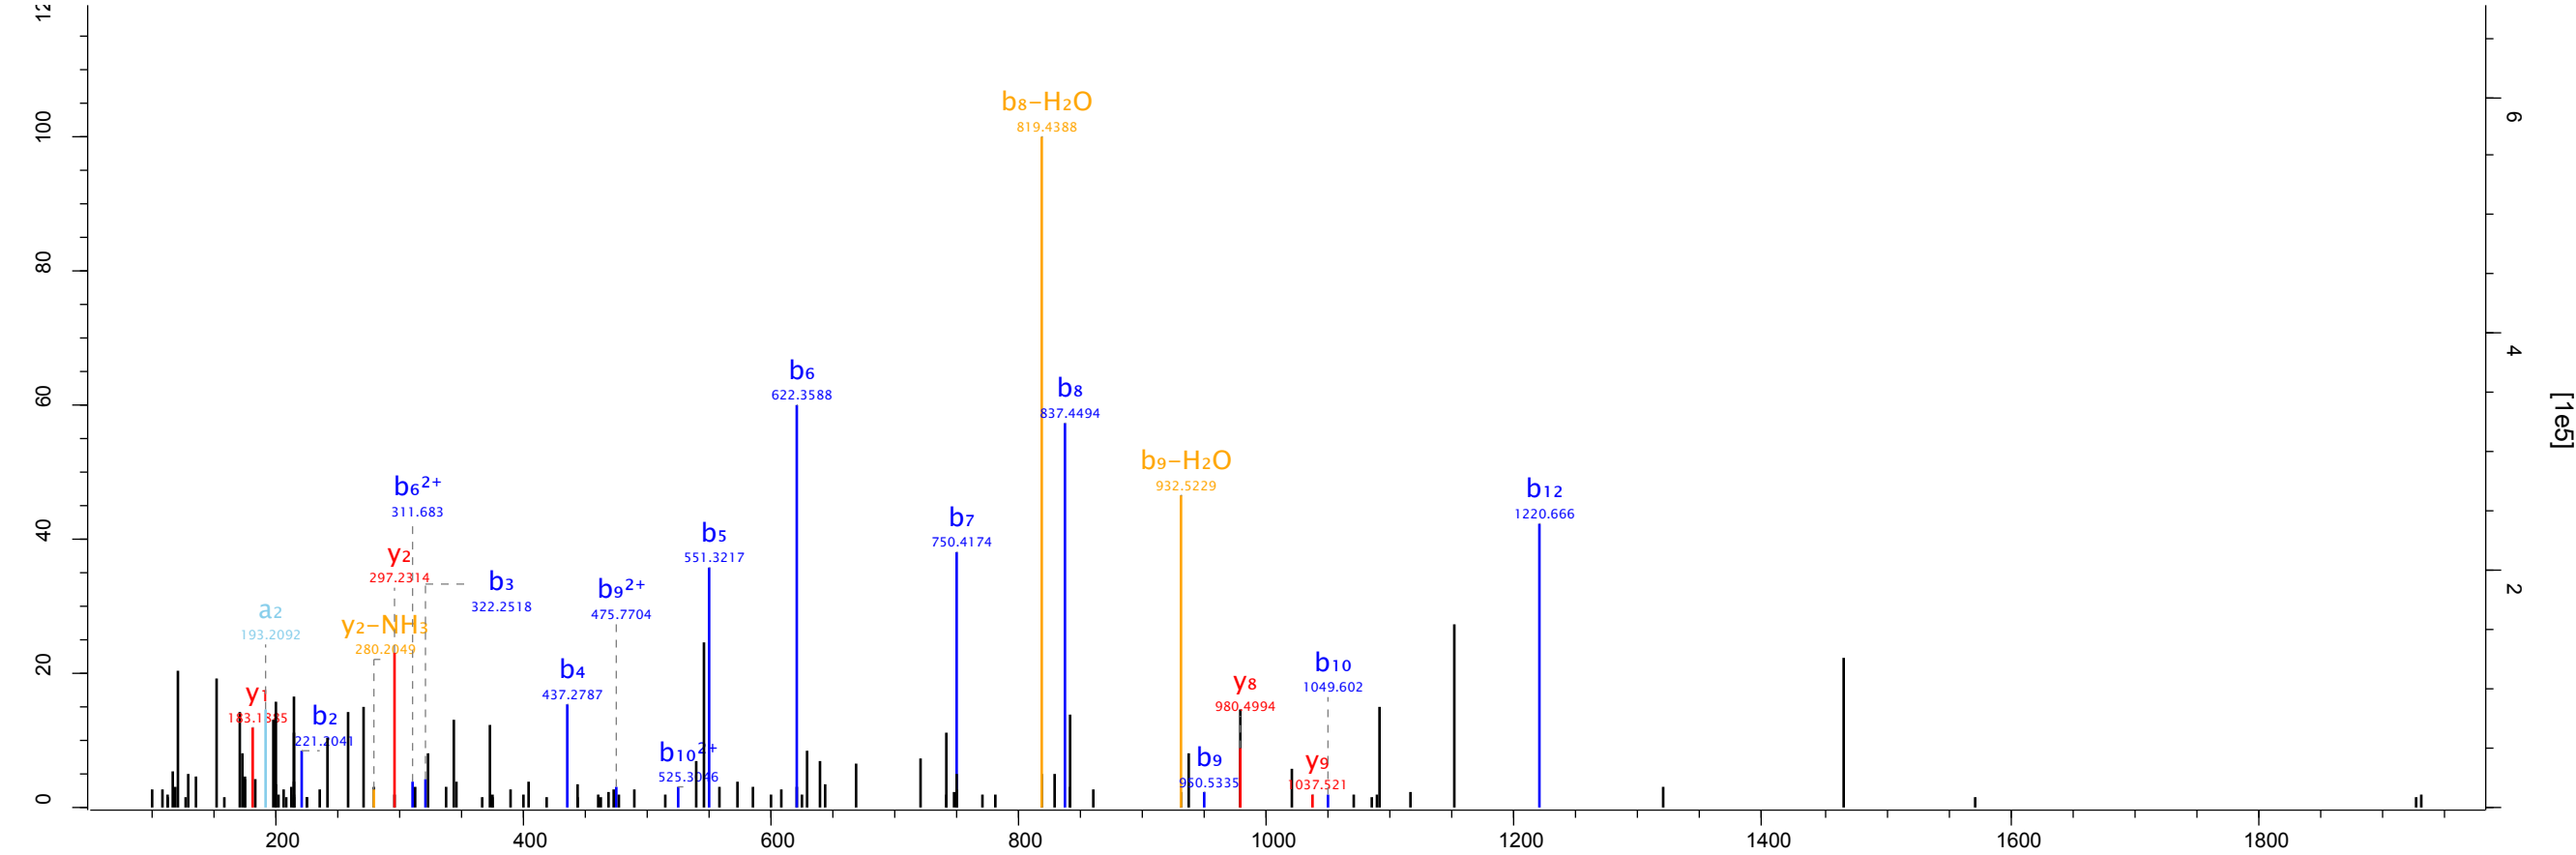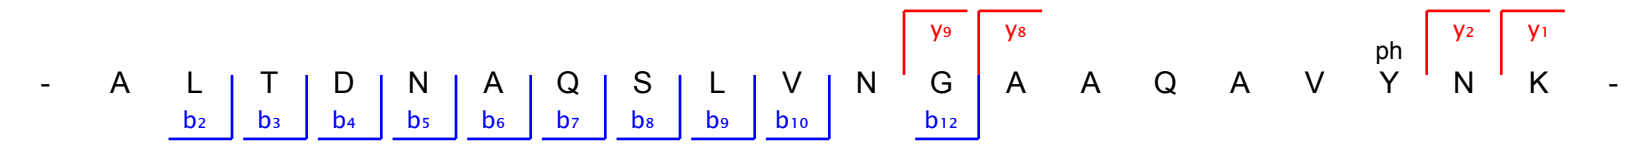

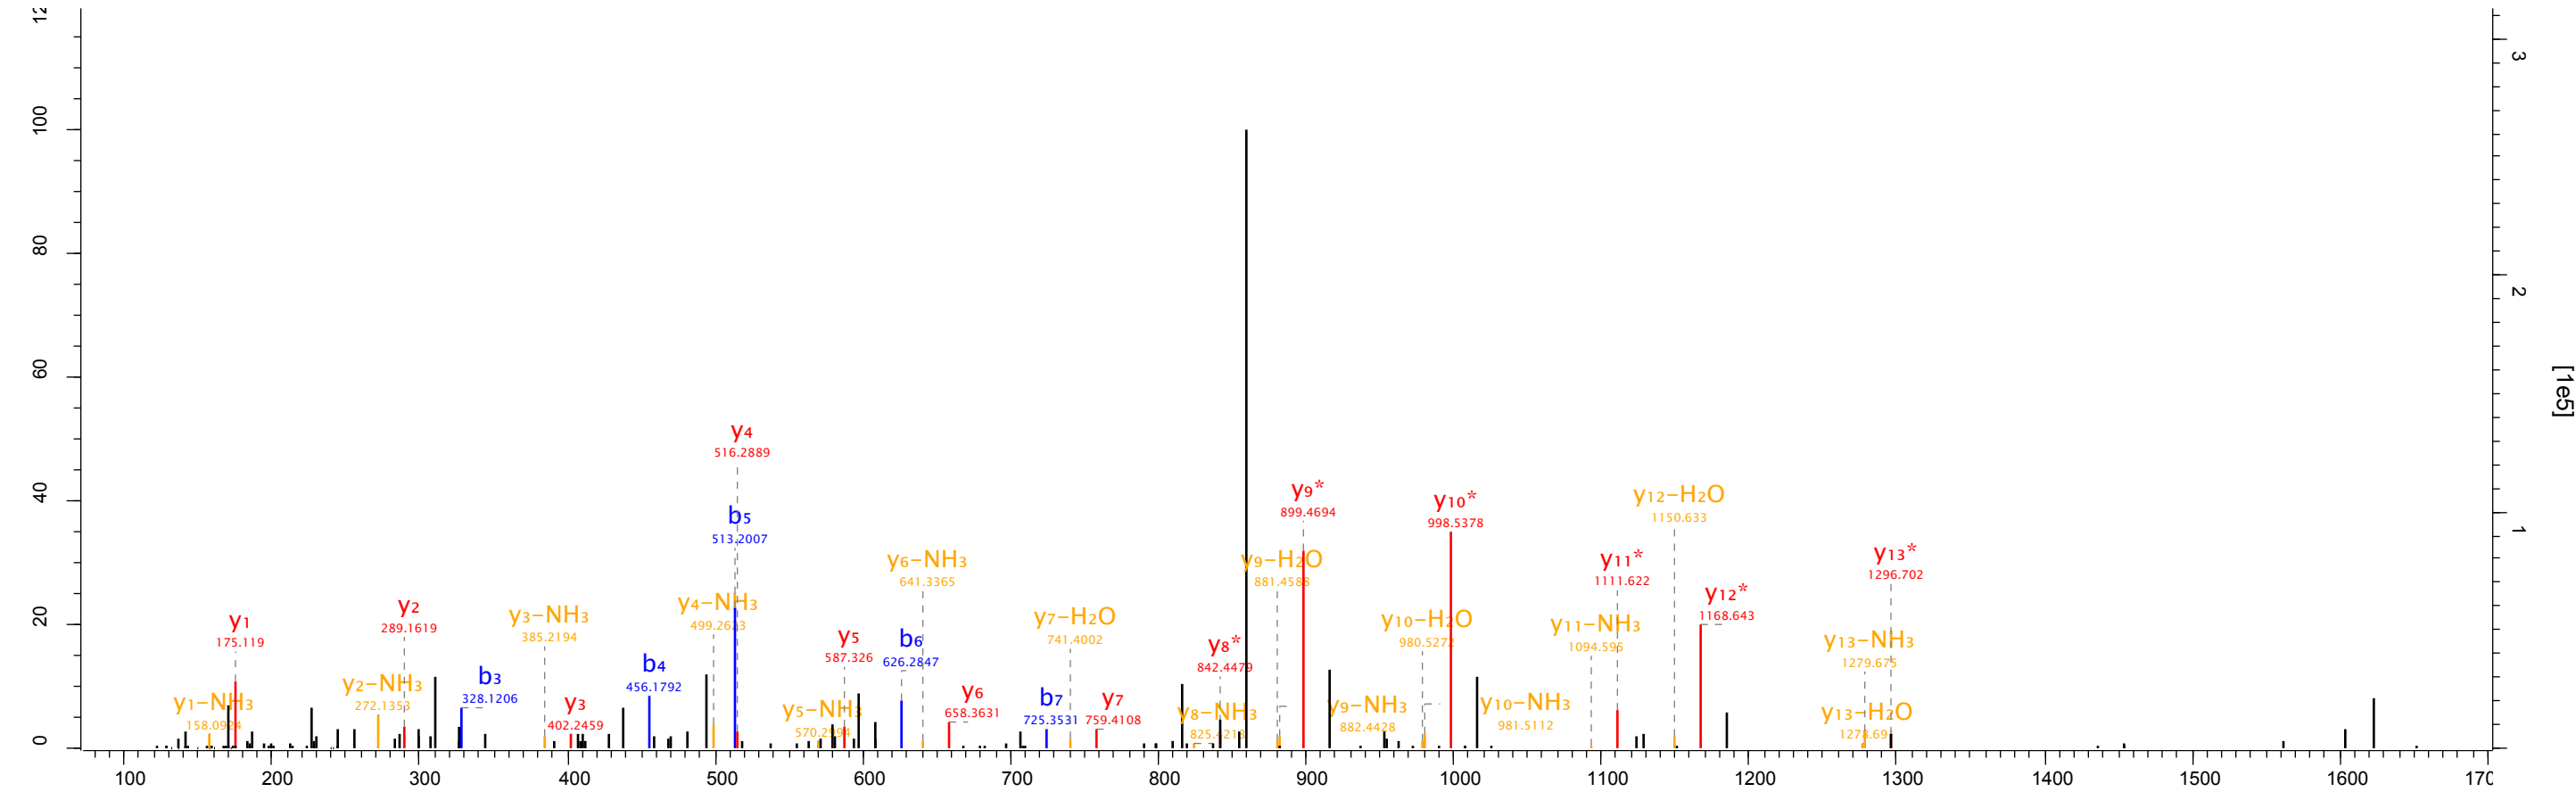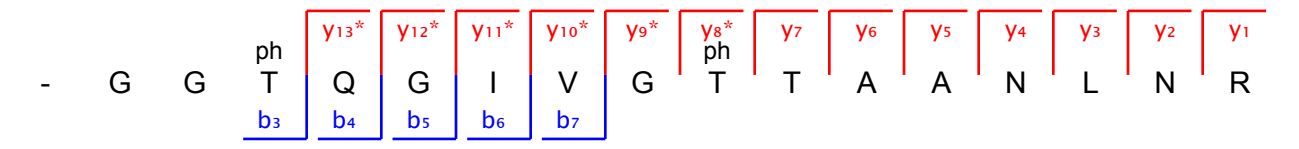

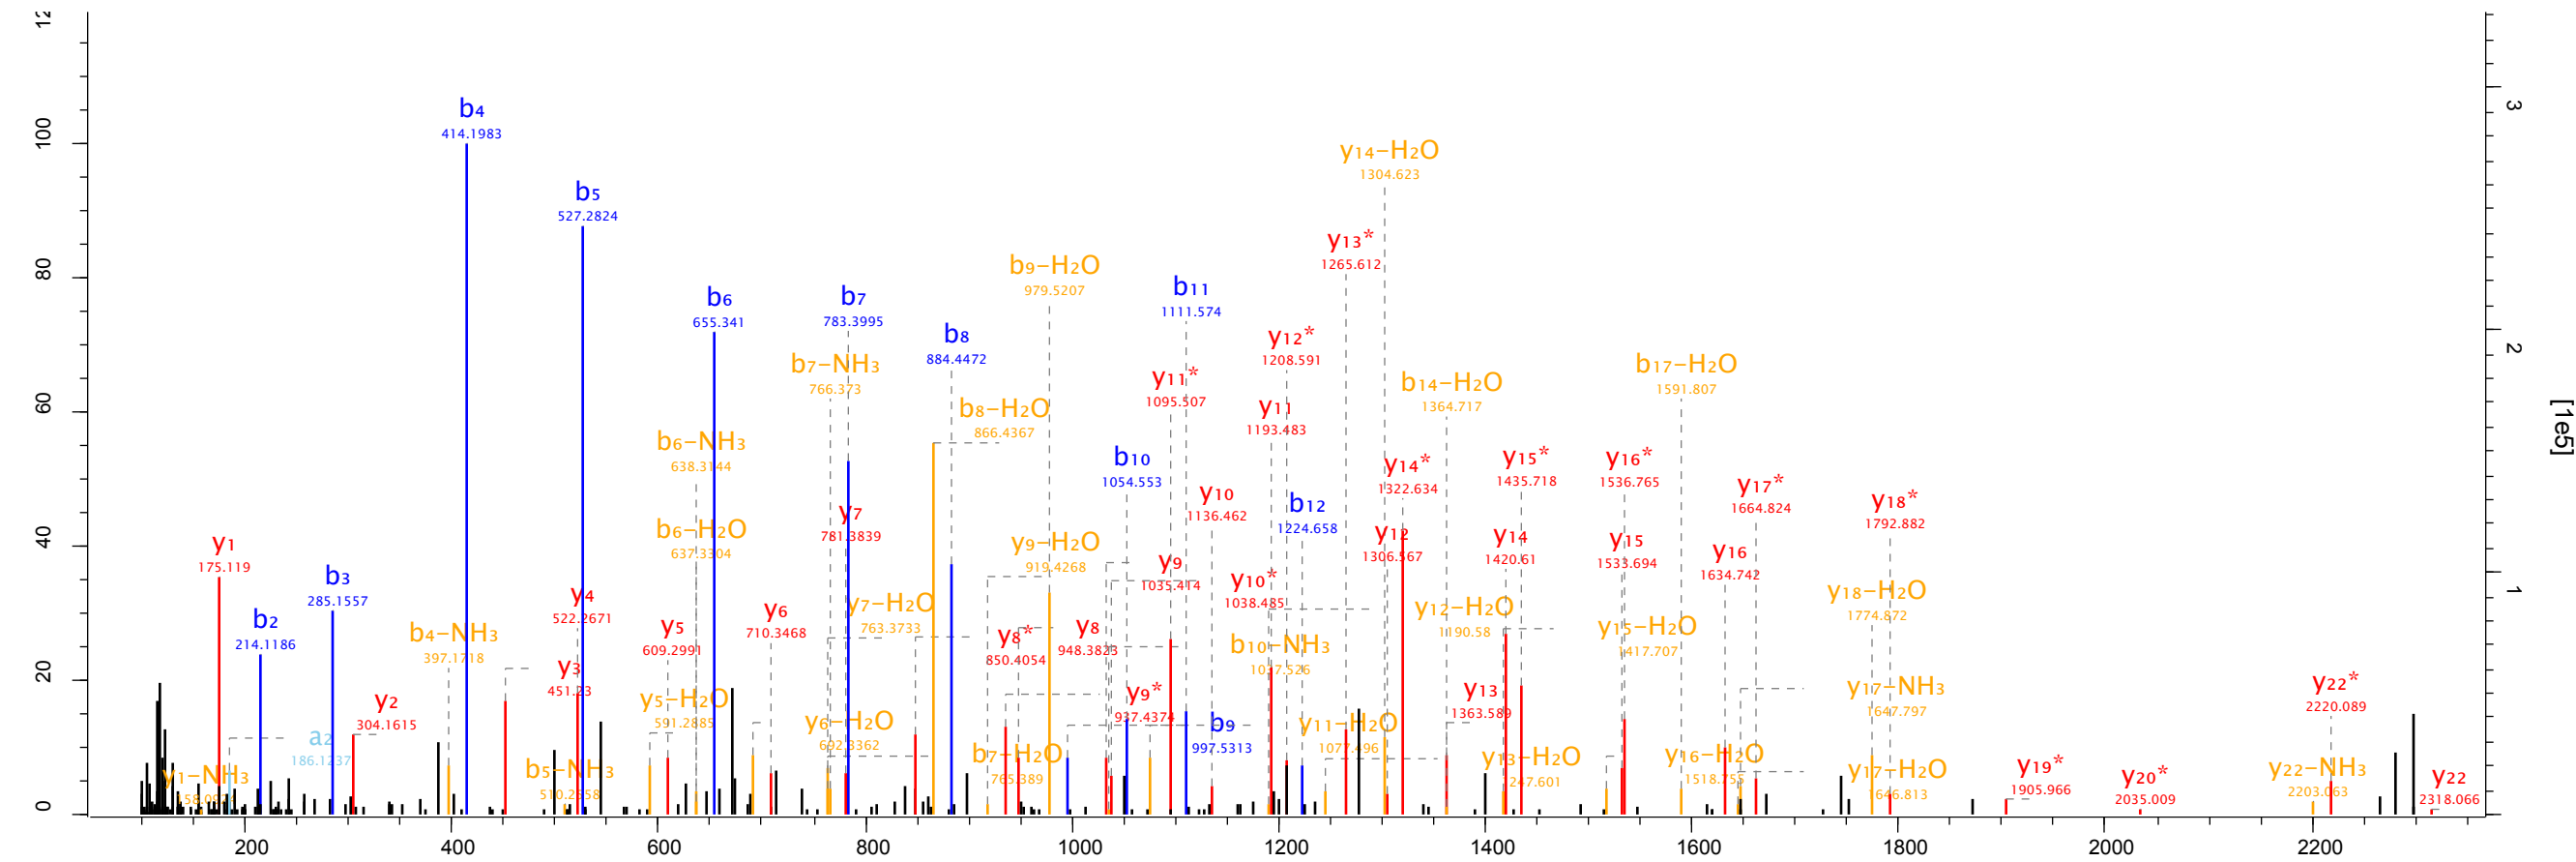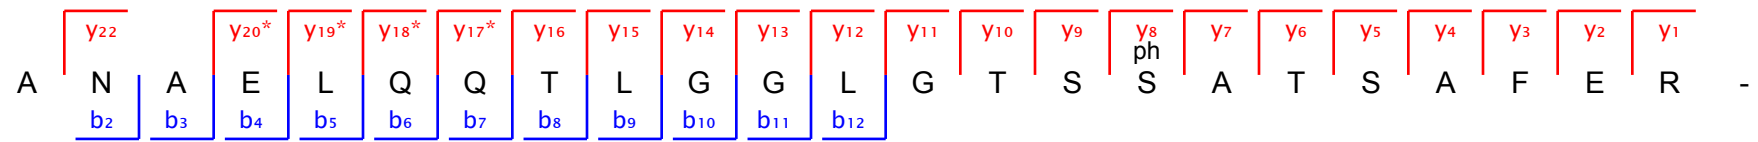

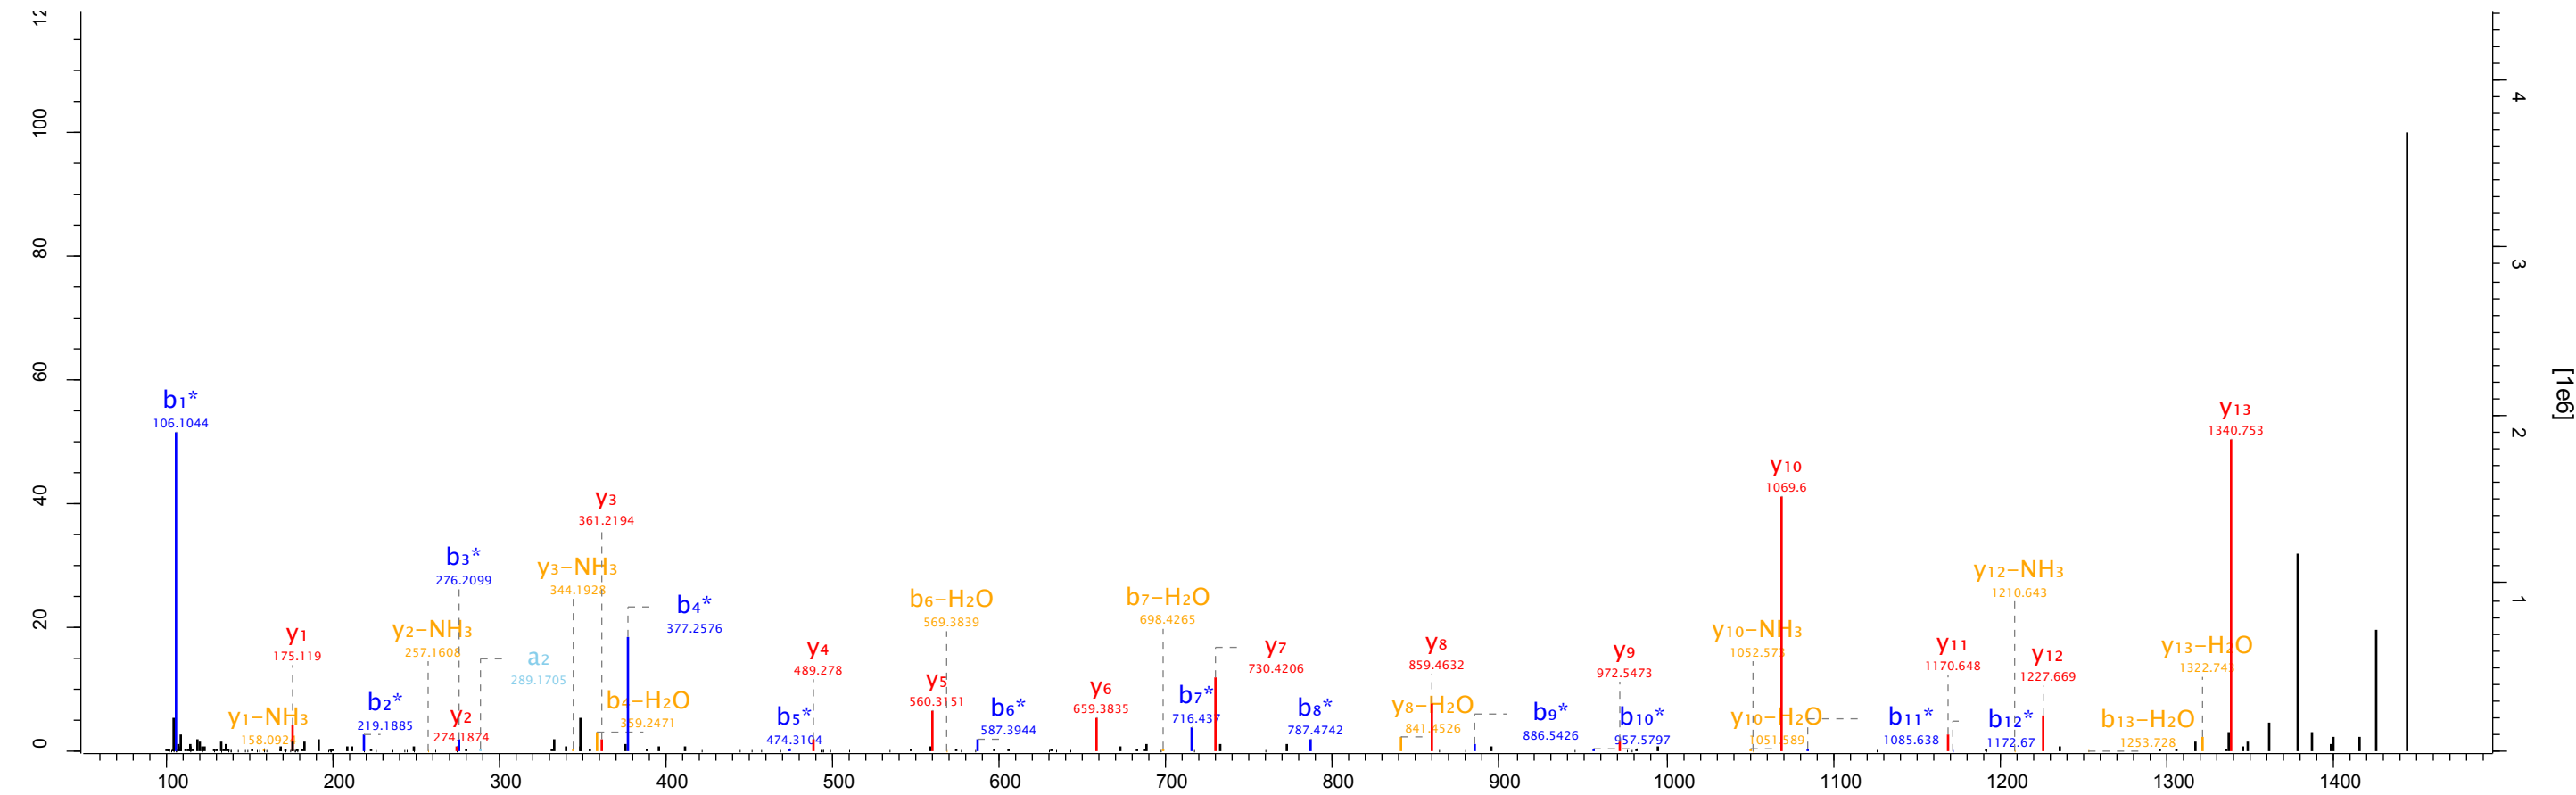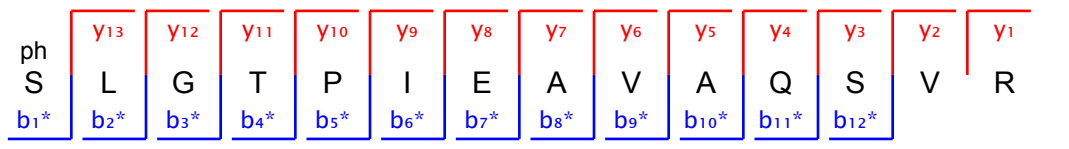



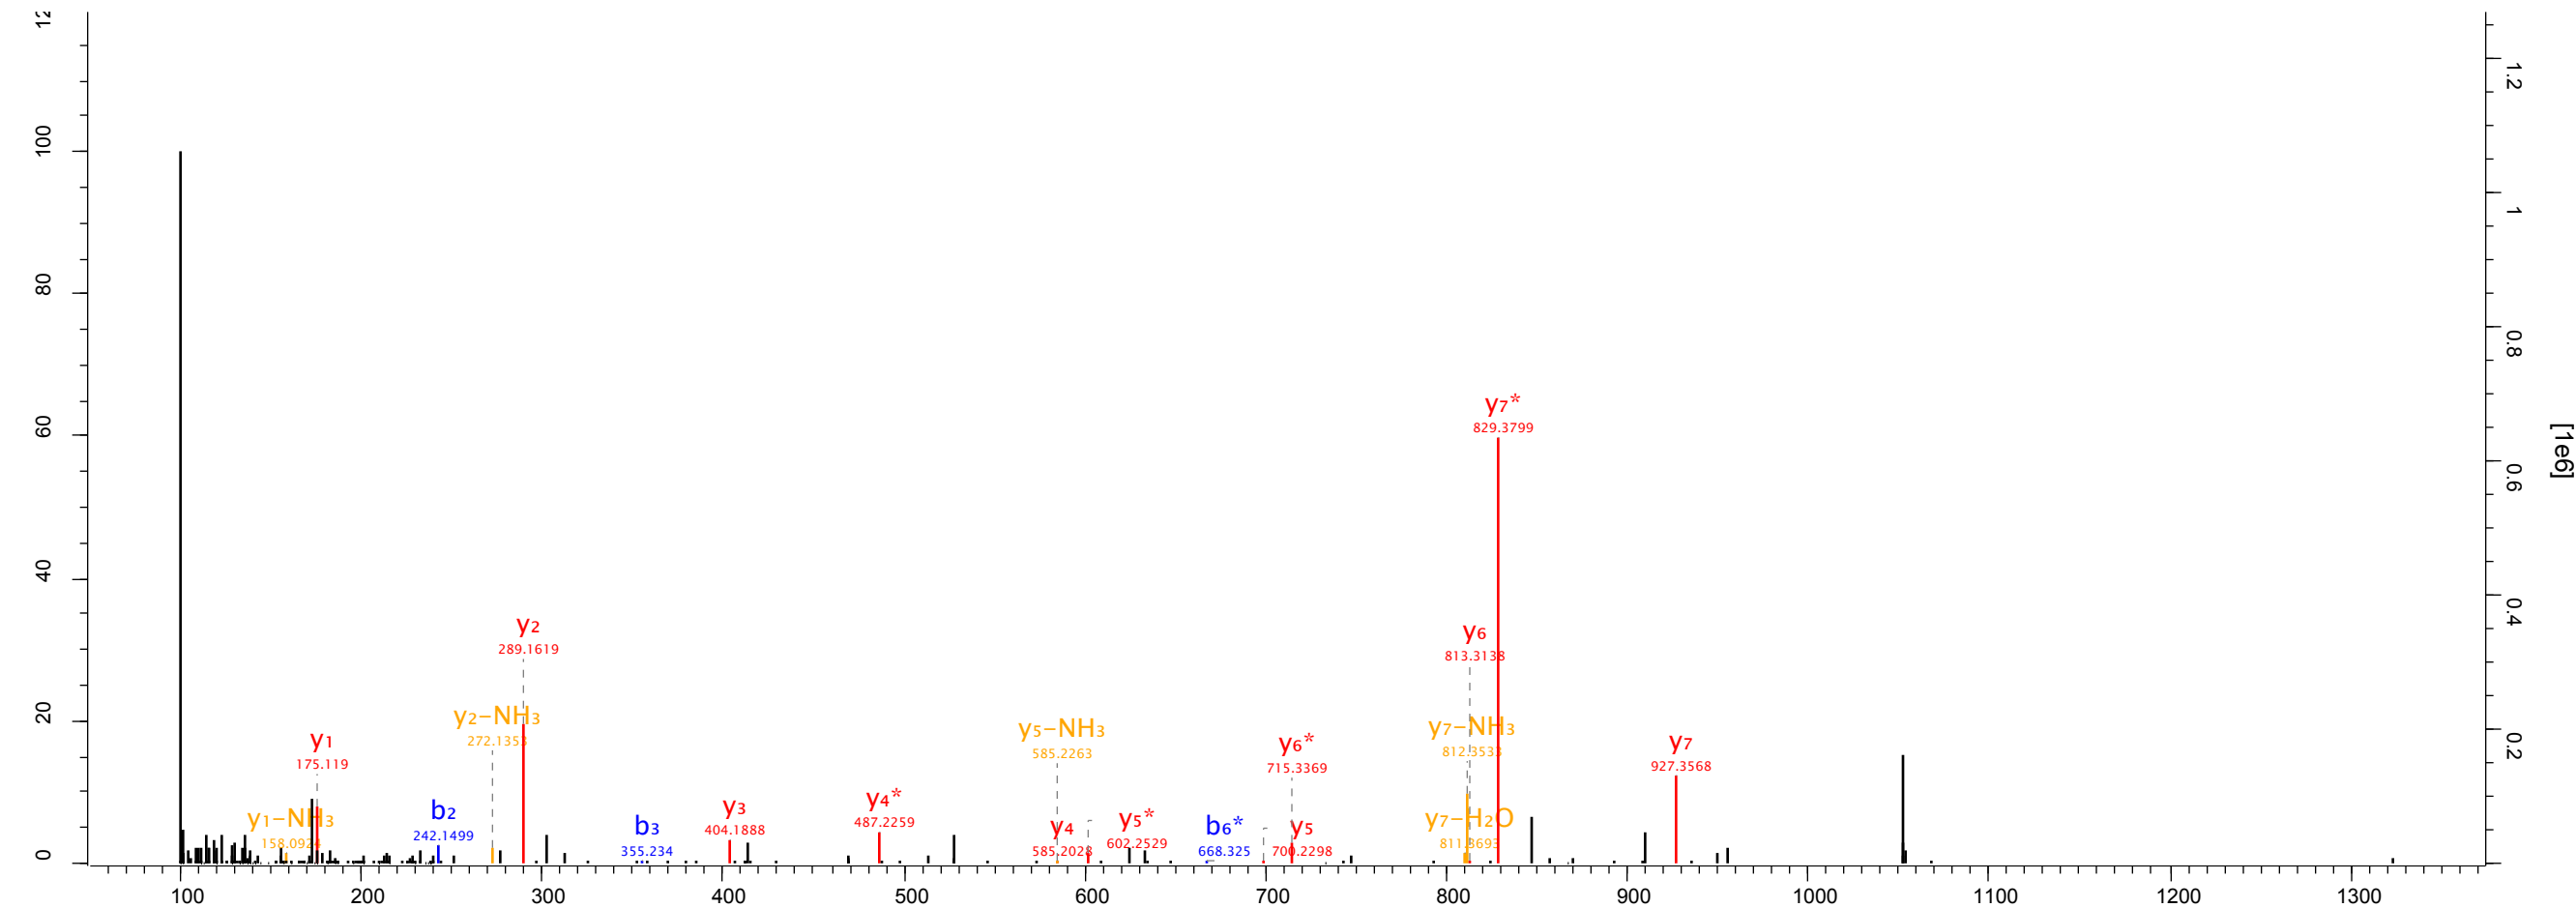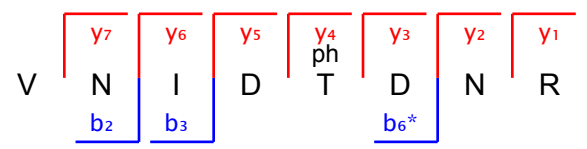

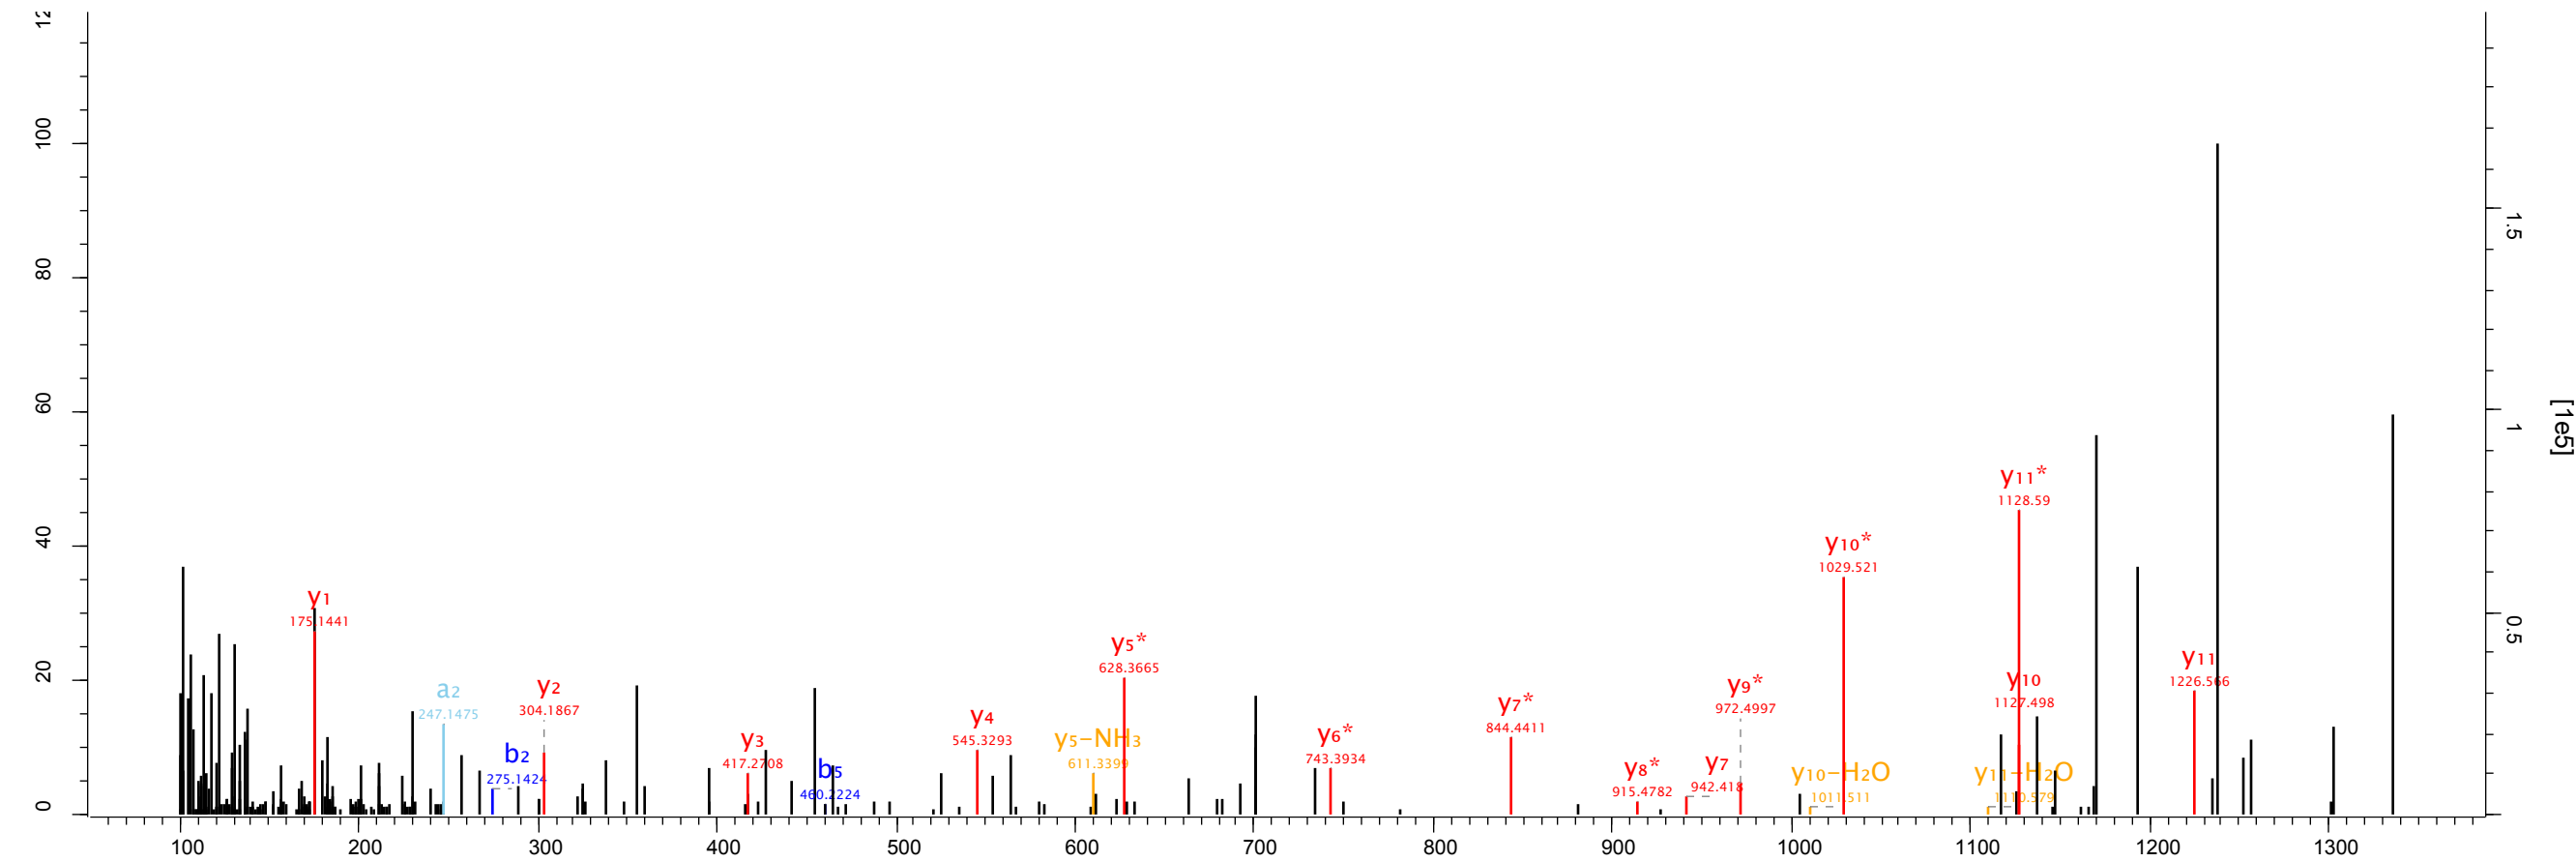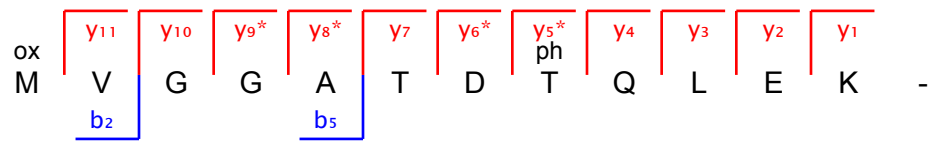

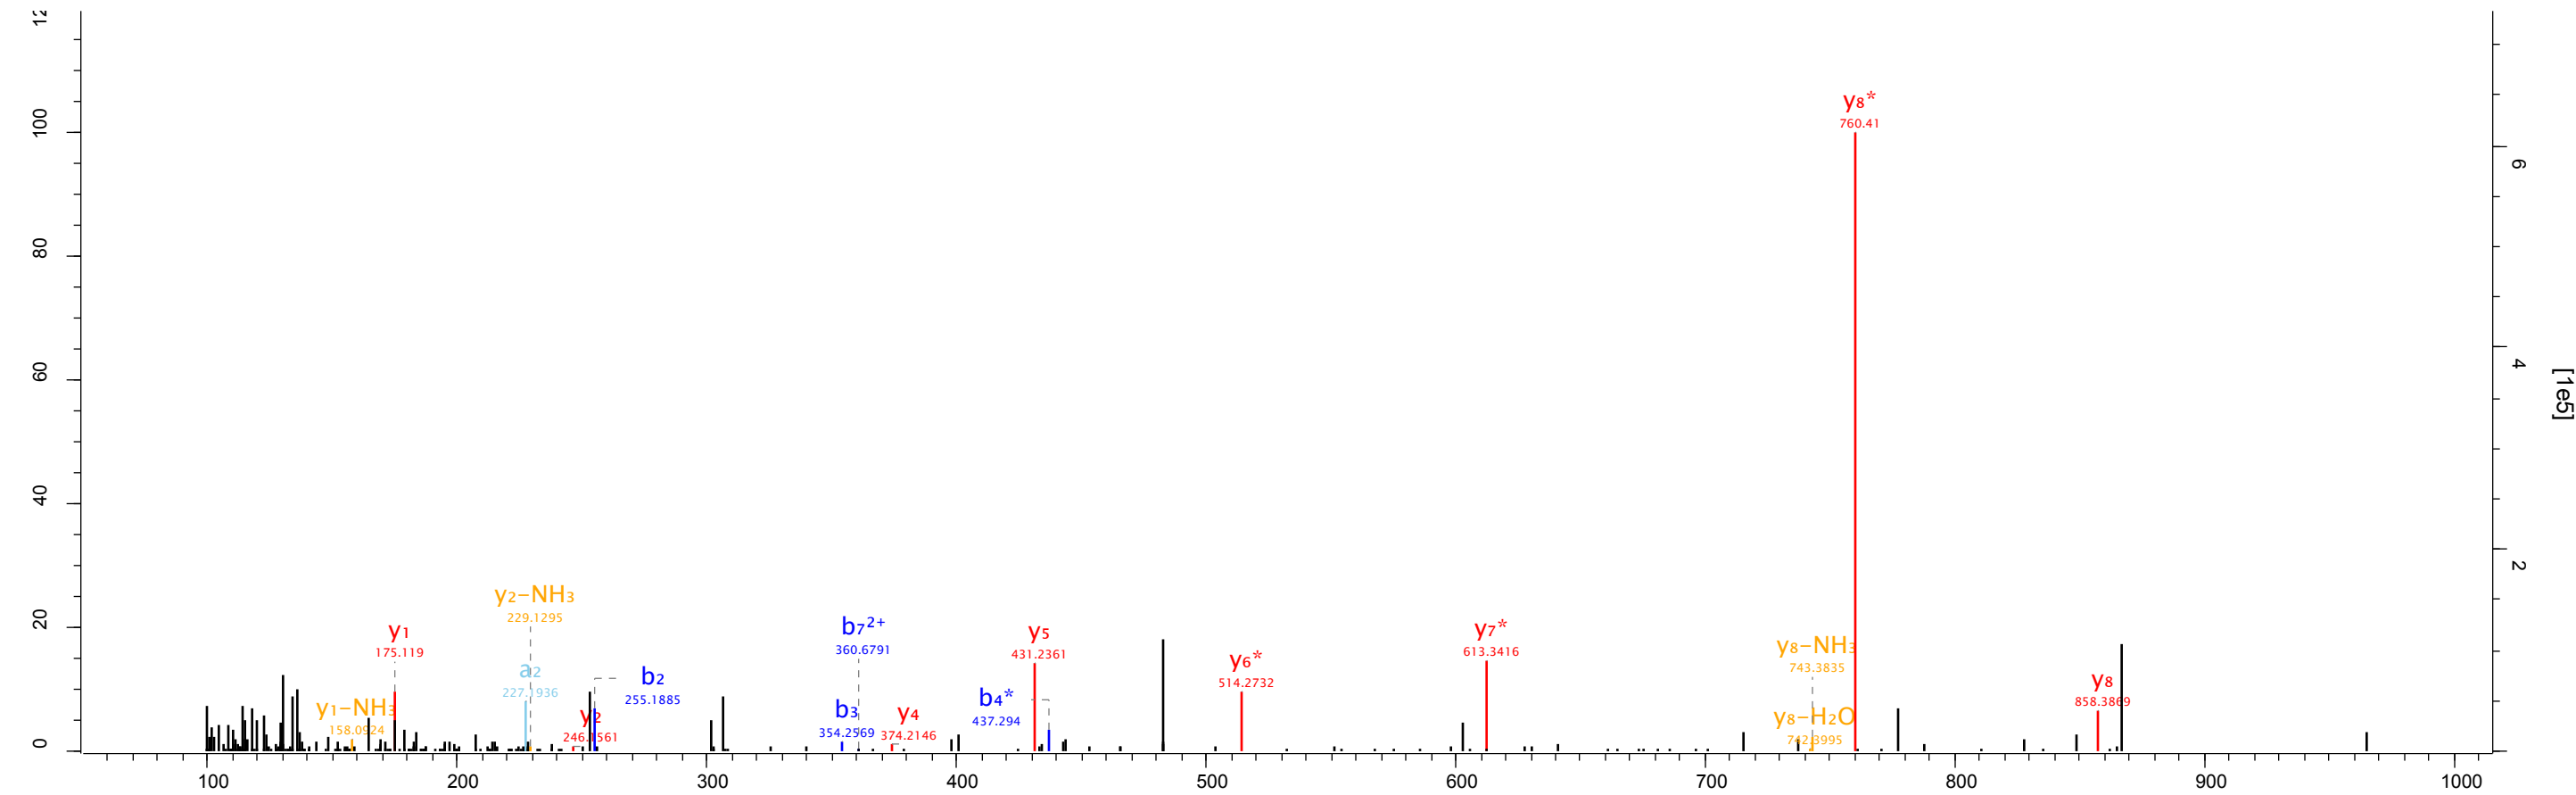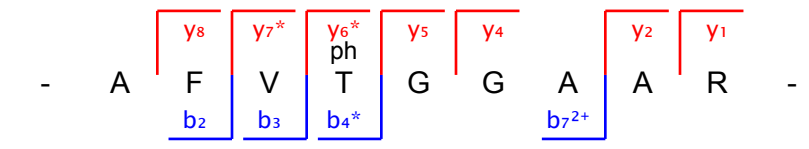

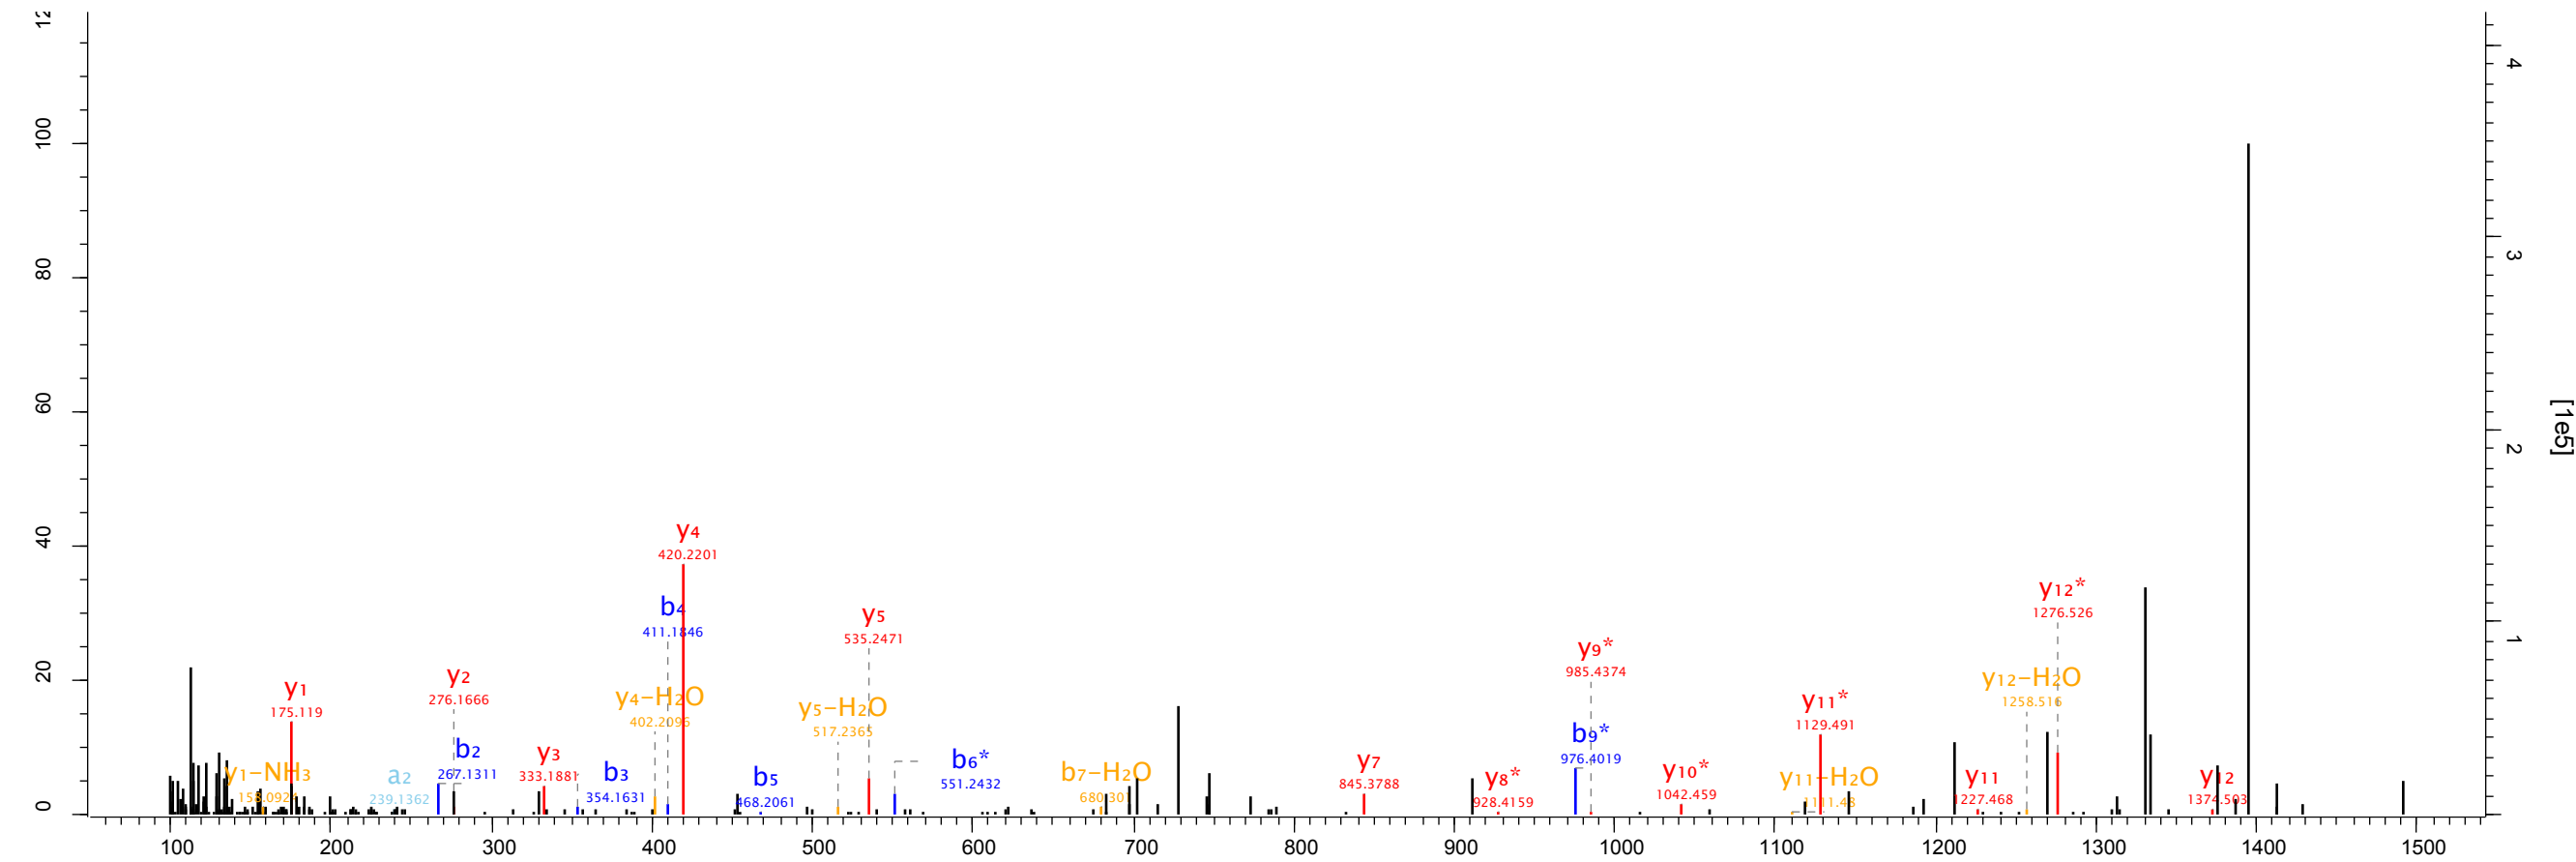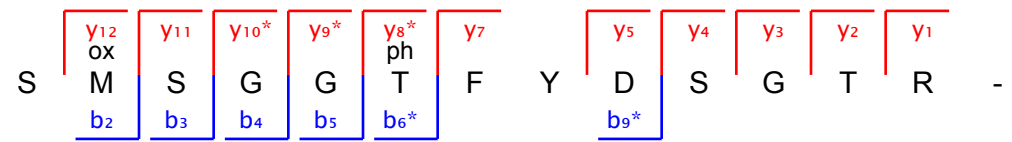

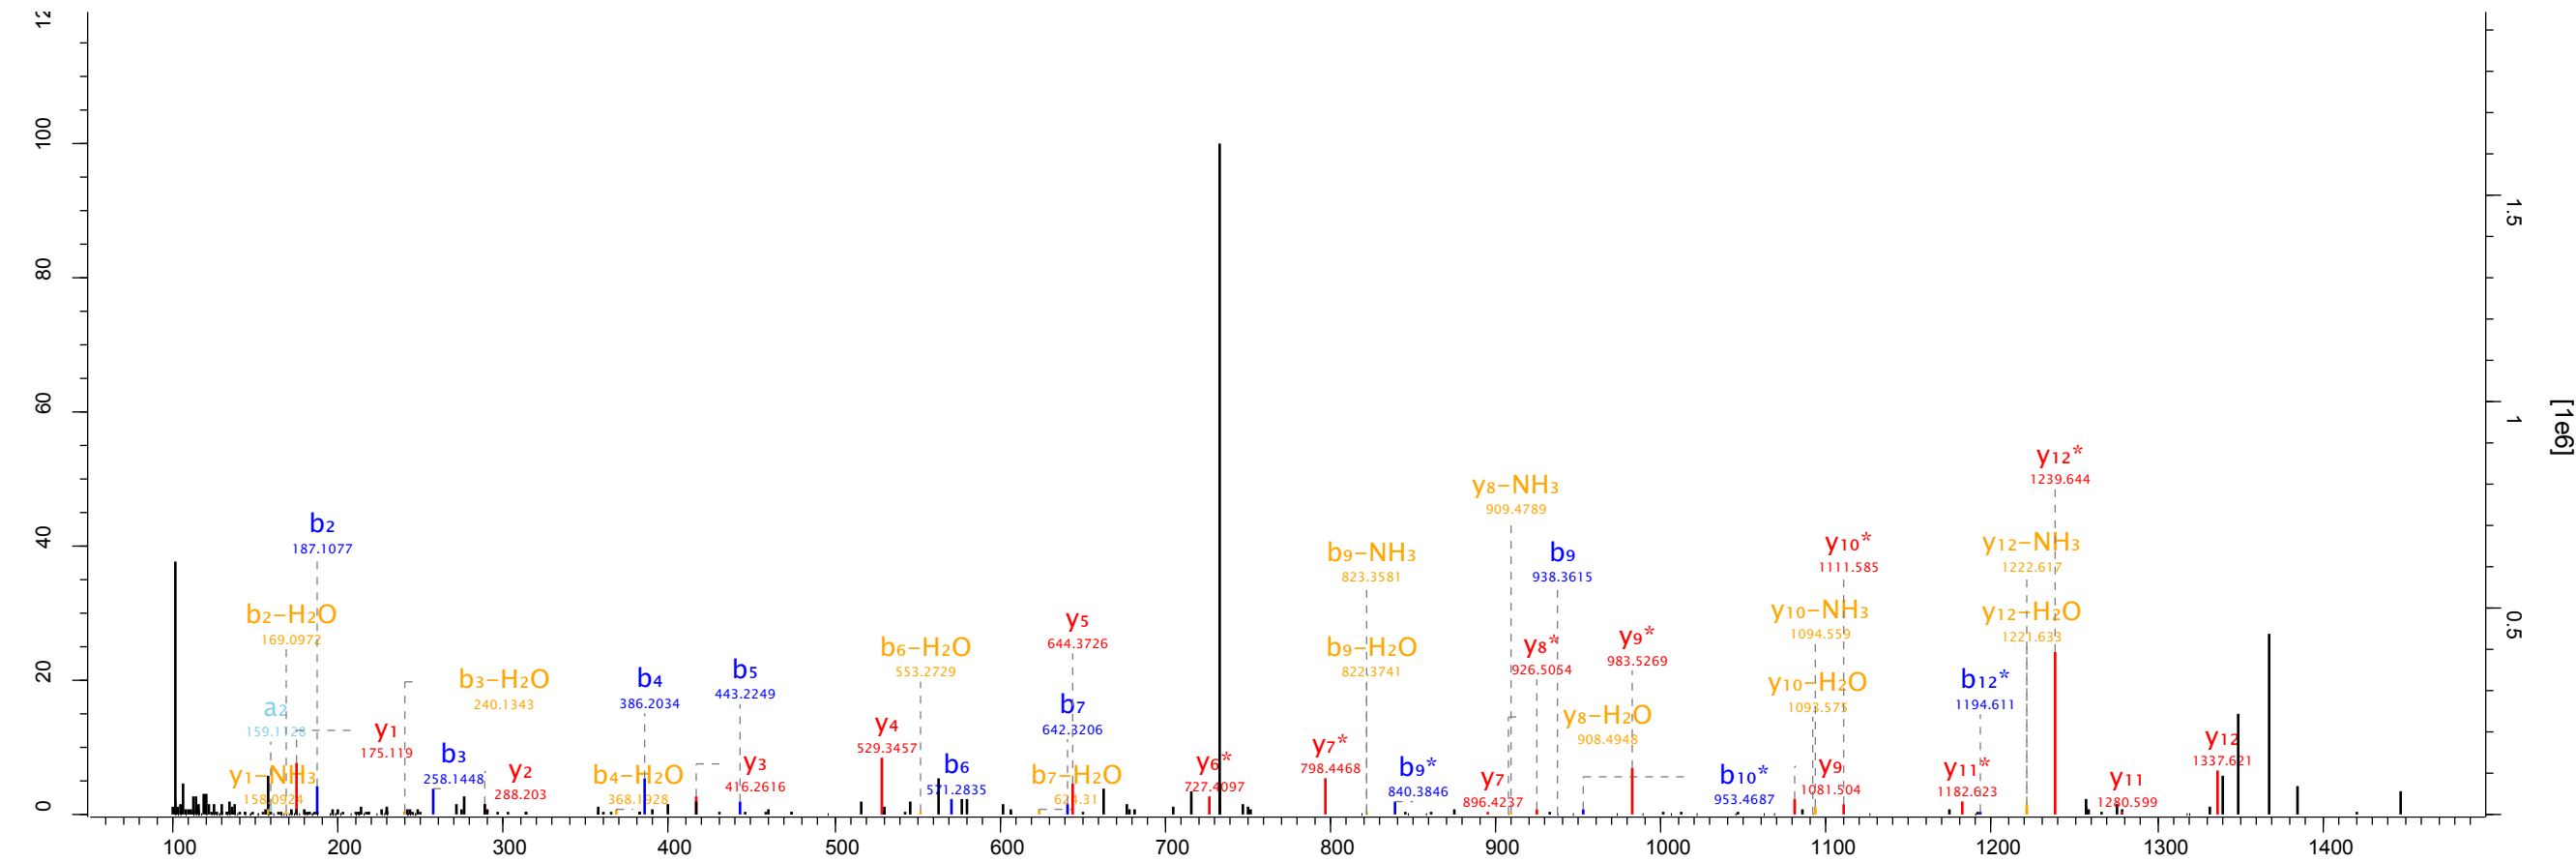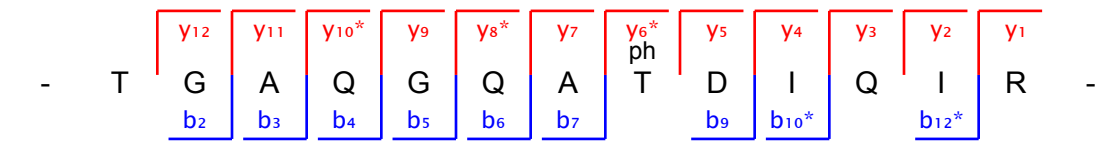

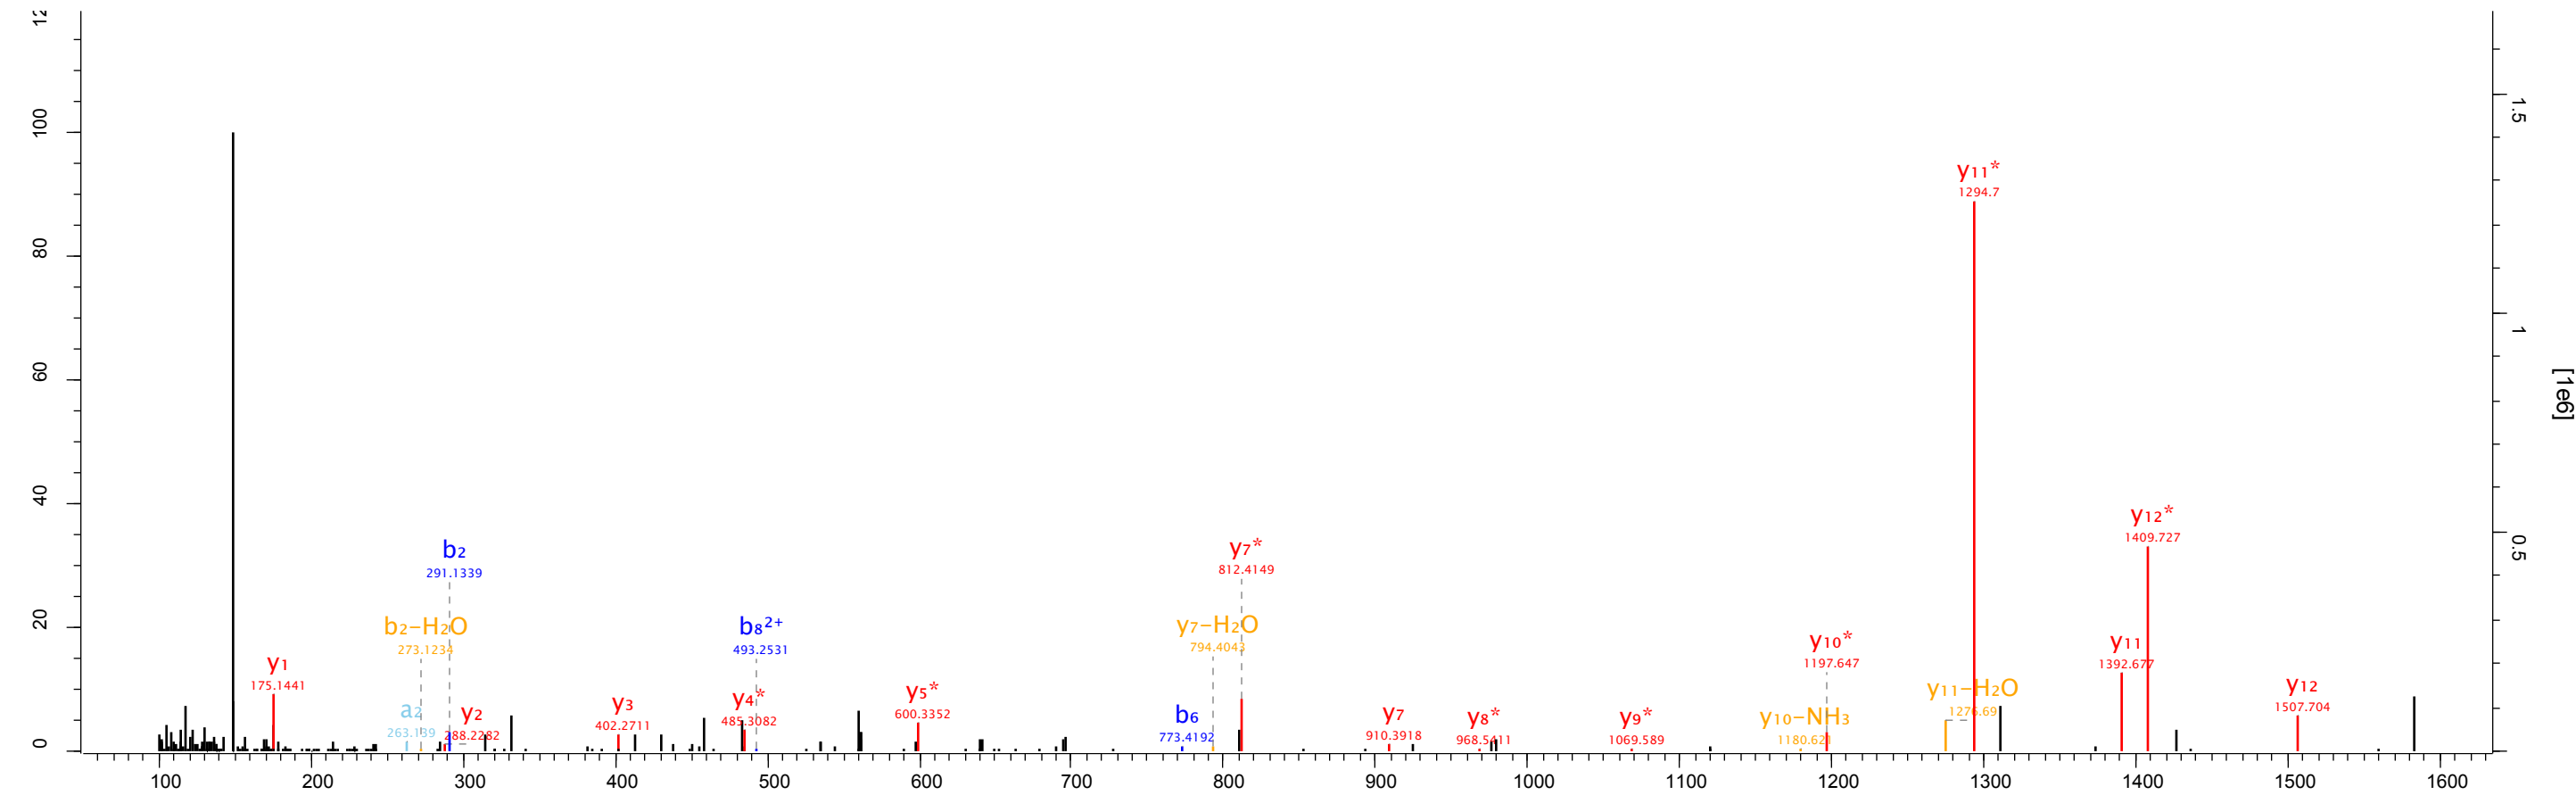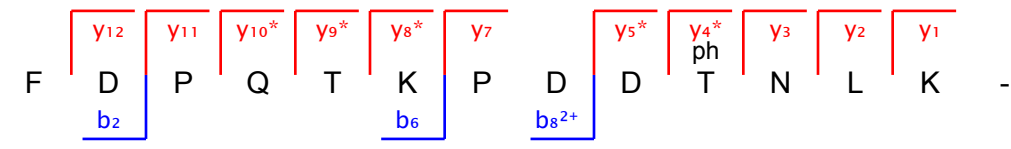

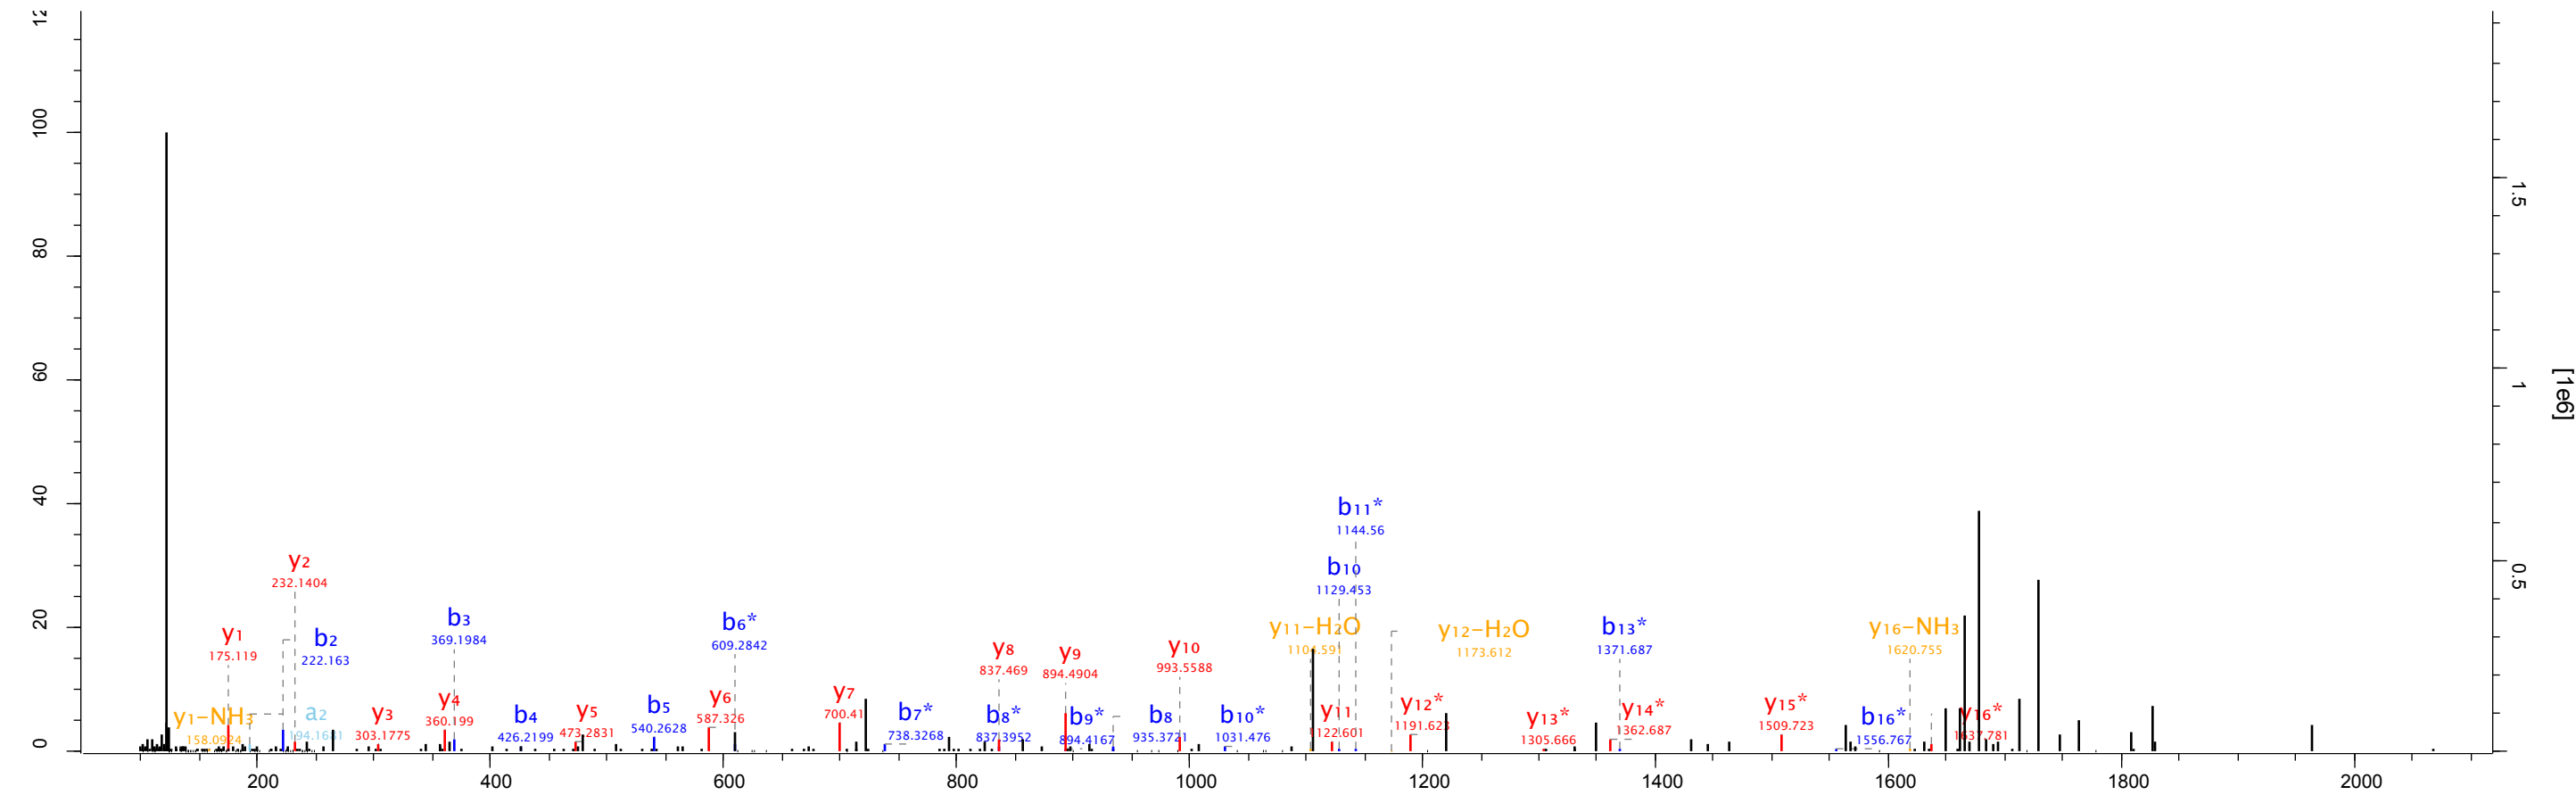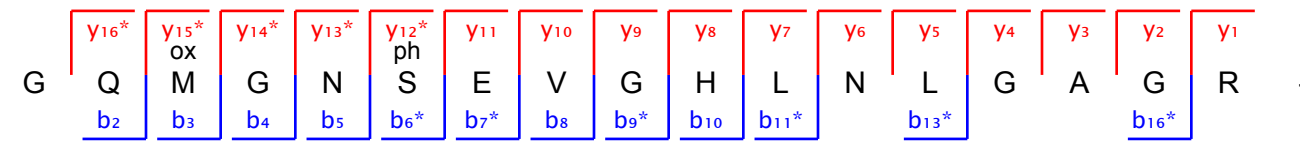

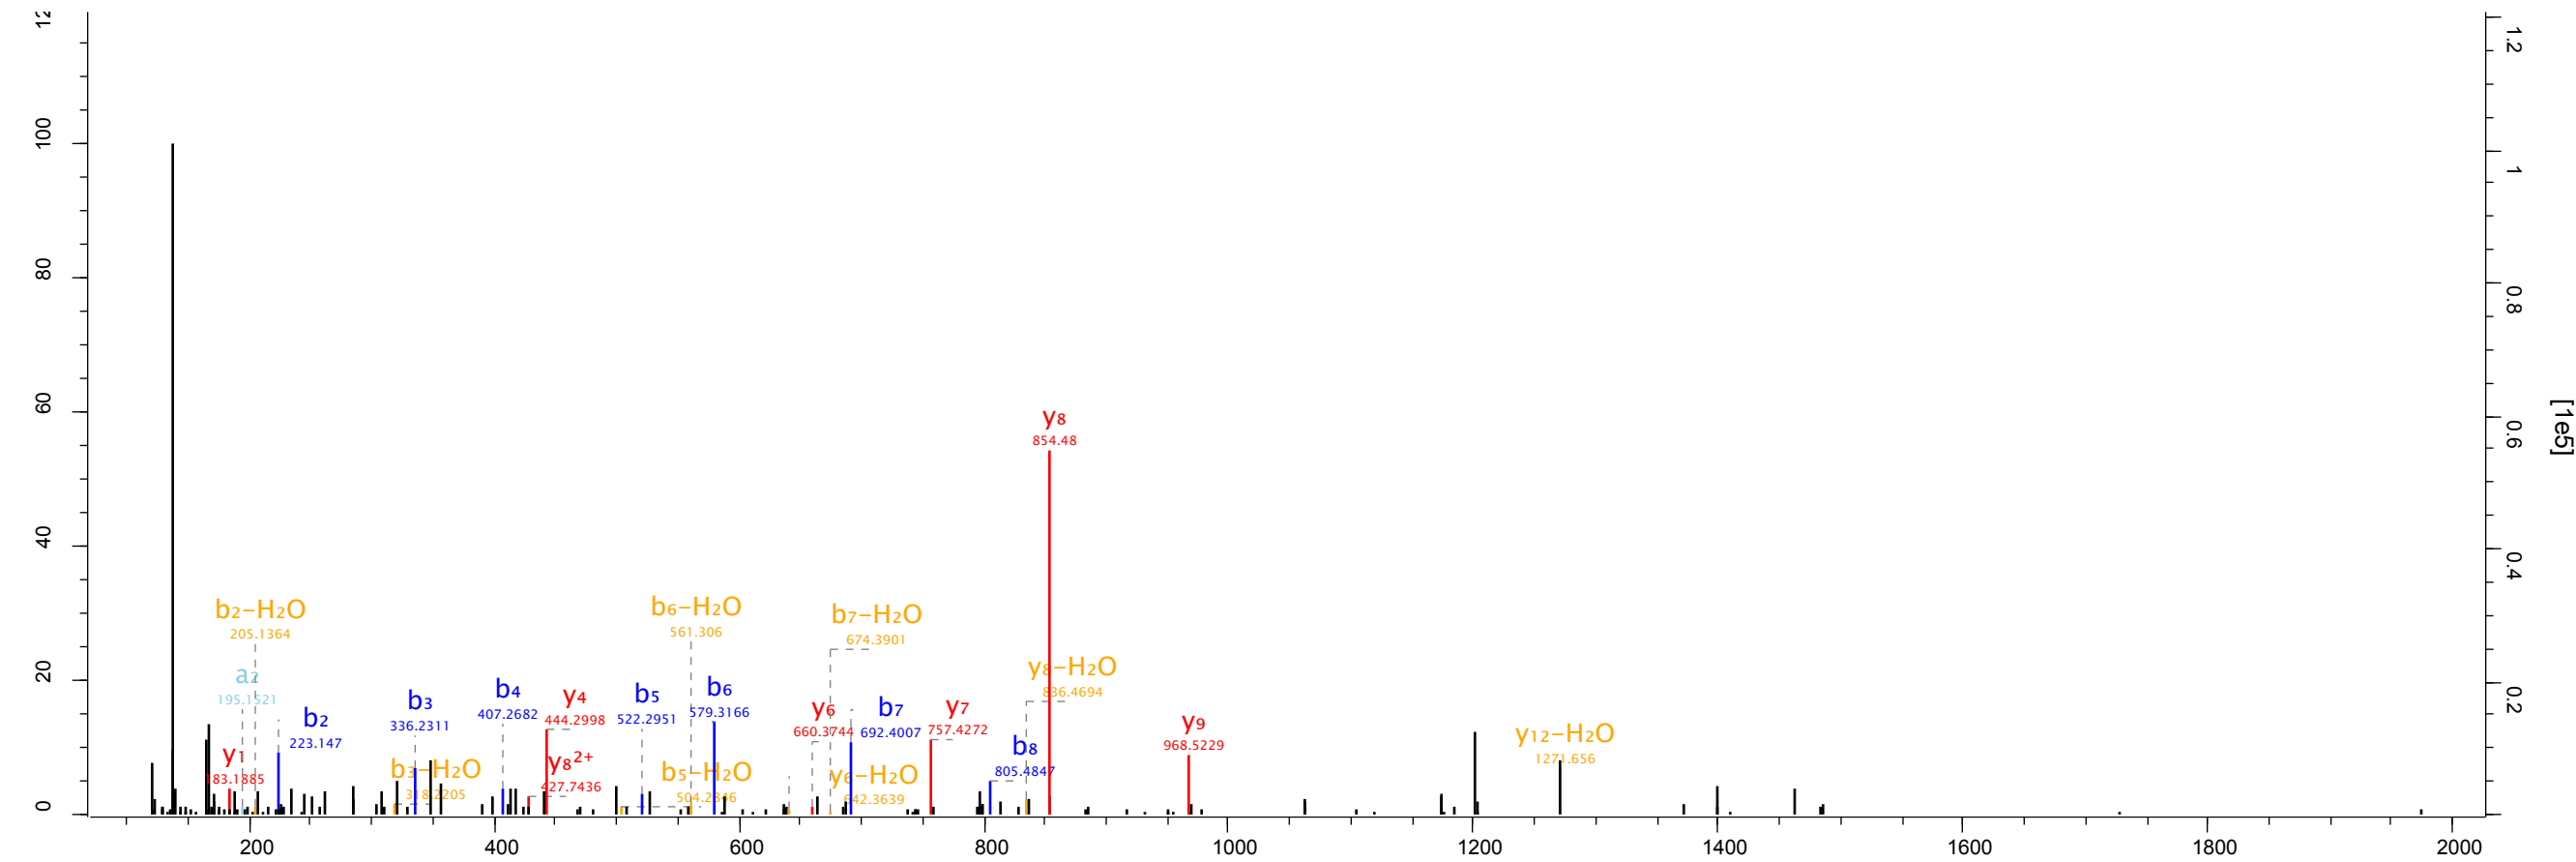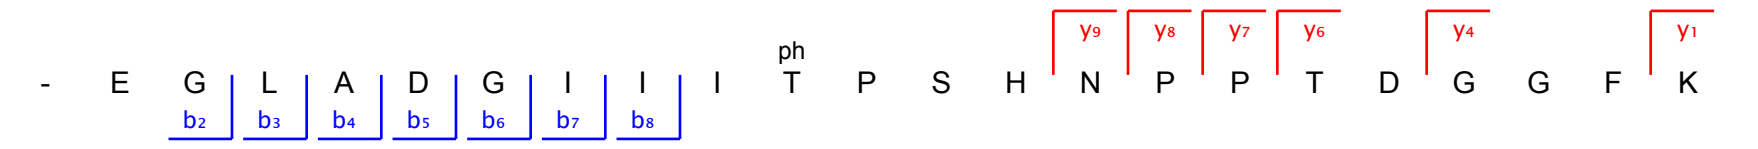

Supplement: 136184_1_supp_127626_p7rc7g.pdf [file 136184_1_supp_127626_p7rc7g.pdf]
