# Supplementary material
Source: PubMed Central journal article supplement (PMC6126389)

**Supplementary MS<sup>2</sup> spectra of proteins identified based on  
a single peptide**

**Chlorosis as developmental program in cyanobacteria:  
The proteomic fundament for surviving and awakening**

| Page | Protein ID      |
|------|------------|------|------------|------|------------|------|-----------------|
| 2    | slI0024    | 37   | slI1513    | 72   | slr0643    | 107  | slr2019         |
| 3    | slI0031    | 38   | slI1613    | 73   | slr0681    | 108  | slr2121         |
| 4    | slI0099    | 39   | slI1666    | 74   | slr0700    | 109  | slr2128         |
| 5    | slI0146    | 40   | slI1751    | 75   | slr0727    | 110  | slr5073         |
| 6    | slI0219    | 41   | slI1820    | 76   | slr0730    | 111  | slr7014         |
| 7    | slI0253    | 42   | slI1874    | 77   | slr0788    | 112  | slr7099         |
| 8    | slI0263    | 43   | slI1969    | 78   | slr0810    | 113  | sml0008         |
| 9    | slI0294    | 44   | slI5028    | 79   | slr0819    | 114  | smr0006         |
| 10   | slI0321    | 45   | slI5043    | 80   | slr0853    | 115  | smr0011         |
| 11   | slI0384    | 46   | slI5067    | 81   | slr0881    | 116  | ssl0350         |
| 12   | slI0419    | 47   | slI5109    | 82   | slr0883    | 117  | ssl0353         |
| 13   | slI0444    | 48   | slI7006    | 83   | slr0919    | 118  | ssl1263         |
| 14   | slI0614    | 49   | slI7047    | 84   | slr0960    | 119  | ssl1326         |
| 15   | slI0641    | 50   | slI8011    | 85   | slr0992    | 120  | ssl1493         |
| 16   | slI0691    | 51   | slI8027    | 86   | slr1019    | 121  | ssl2064         |
| 17   | slI0743    | 52   | slr0023    | 87   | slr1097    | 122  | ssl2507         |
| 18   | slI0751    | 53   | slr0036    | 88   | slr1114    | 123  | ssl2615         |
| 19   | slI0809    | 54   | slr0041    | 89   | slr1209    | 124  | ssl3383         |
| 20   | slI0832    | 55   | slr0053    | 90   | slr1253    | 125  | ssl6092         |
| 21   | slI0834    | 56   | slr0152    | 91   | slr1271    | 126  | ssl7039         |
| 22   | slI0864    | 57   | slr0270    | 92   | slr1327    | 127  | ssl7074         |
| 23   | slI0875    | 58   | slr0272    | 93   | slr1398    | 128  | ssr0109         |
| 24   | slI0992    | 59   | slr0303    | 94   | slr1417    | 129  | ssr0390         |
| 25   | slI1057    | 60   | slr0324    | 95   | slr1461    | 130  | ssr1473         |
| 26   | slI1103    | 61   | slr0327    | 96   | slr1518    | 131  | ssr1562         |
| 27   | slI1121    | 62   | slr0345    | 97   | slr1565    | 132  | ssr1768         |
| 28   | slI1132    | 63   | slr0363    | 98   | slr1566    | 133  | ssr2067         |
| 29   | slI1232    | 64   | slr0415    | 99   | slr1664    | 134  | ssr2439         |
| 30   | slI1318    | 65   | slr0468    | 100  | slr1738    | 135  | ssr2595;ssl2542 |
| 31   | slI1329    | 66   | slr0491    | 101  | slr1760    | 136  | ssr2723         |
| 32   | slI1340    | 67   | slr0519    | 102  | slr1774    | 137  | ssr2787         |
| 33   | slI1399    | 68   | slr0531    | 103  | slr1787    | 138  | ssr3188         |
| 34   | slI1447    | 69   | slr0589    | 104  | slr1875    | 139  | ssr3189         |
| 35   | slI1459    | 70   | slr0601    | 105  | slr1929    | 140  | ssr3307         |
| 36   | slI1504    | 71   | slr0630    | 106  | slr1956    | 141  | ssr5117         |

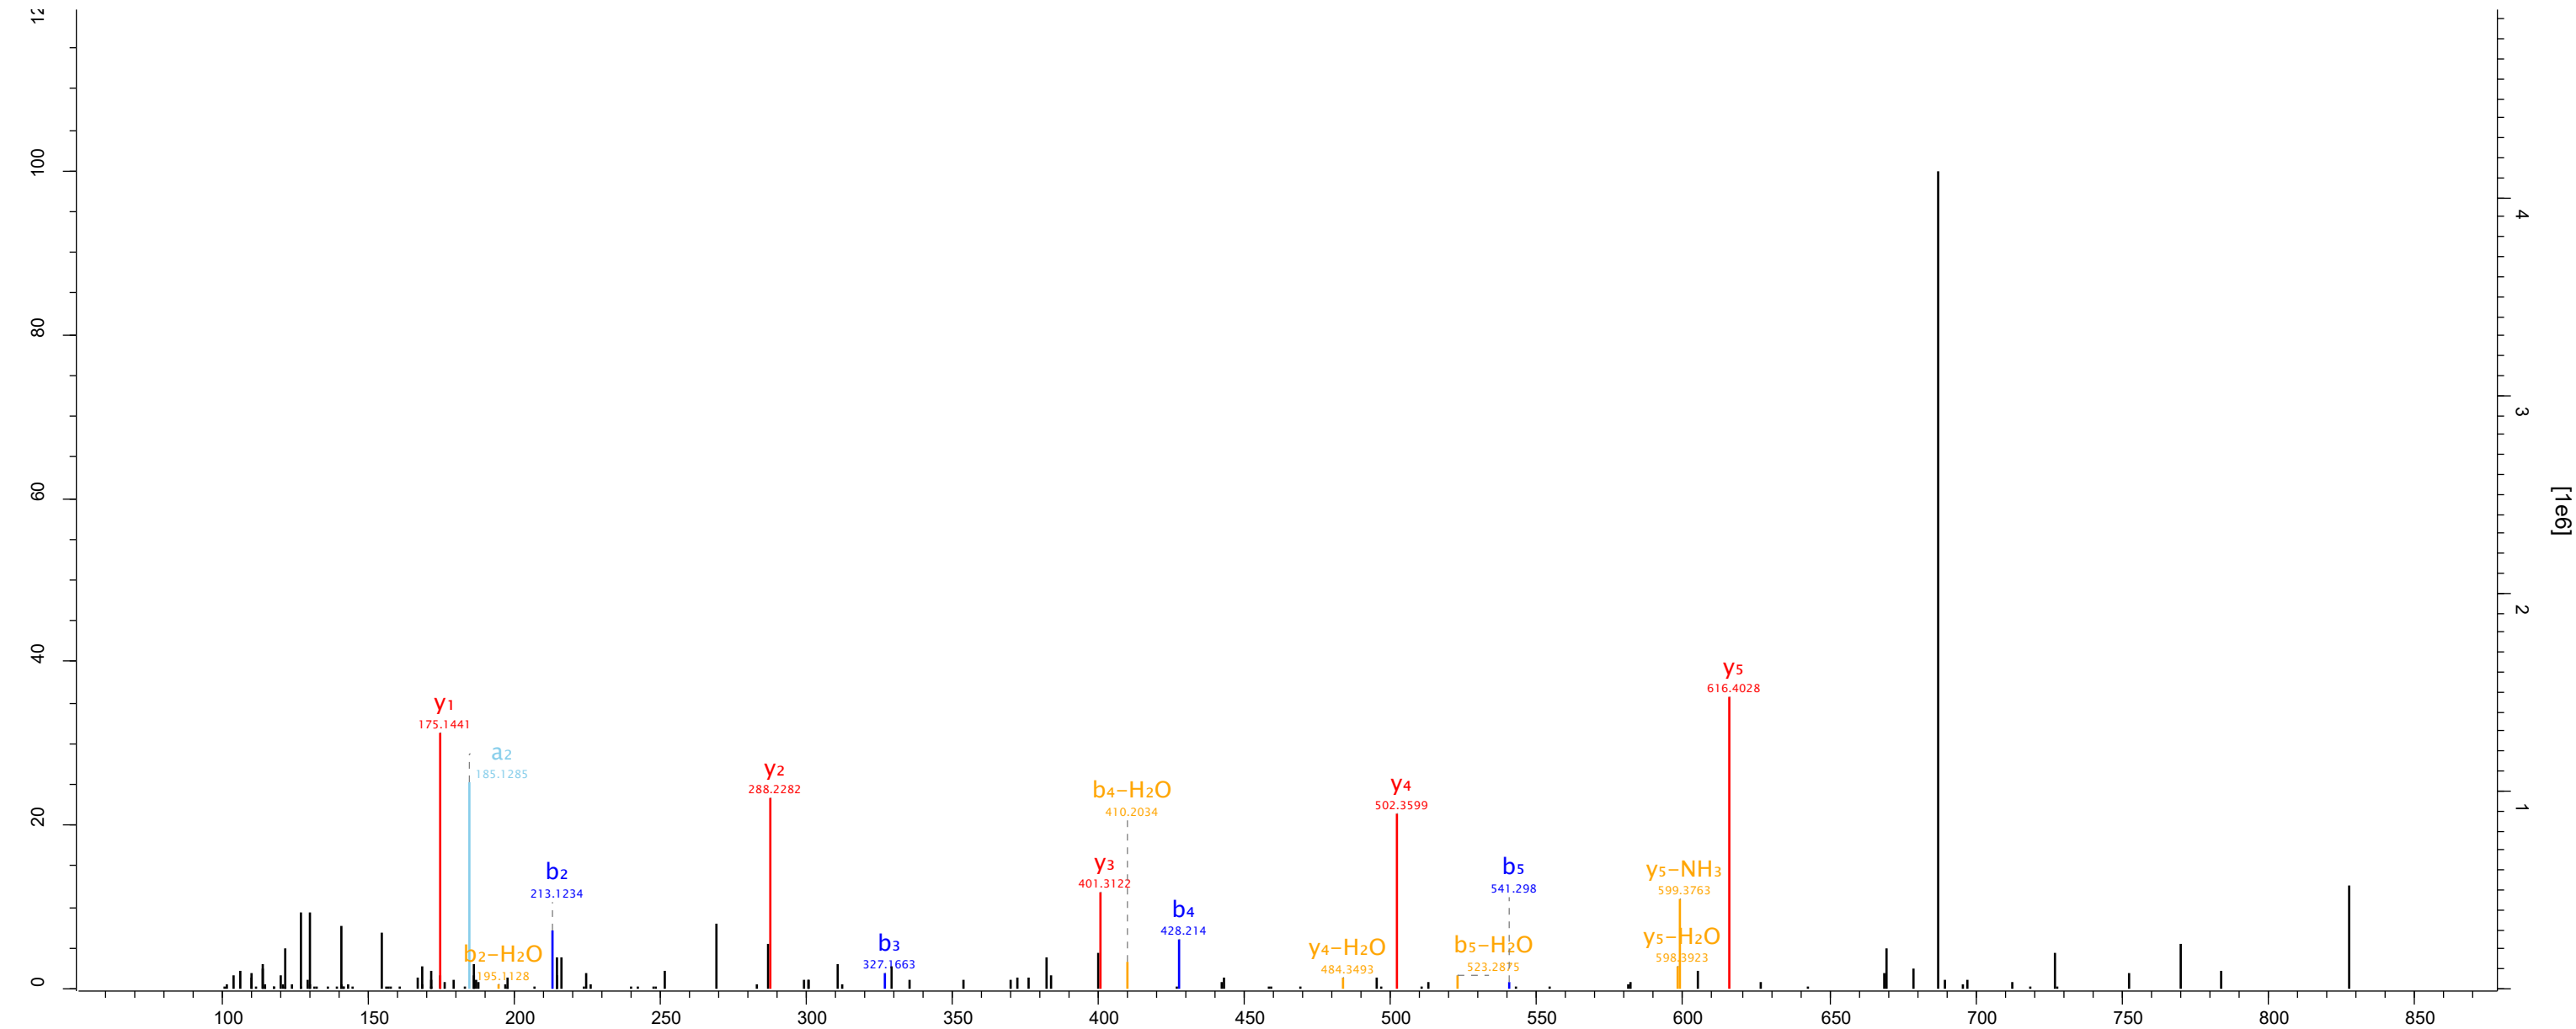

[1e6]

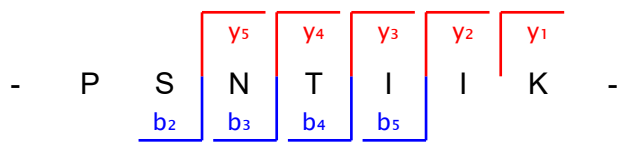

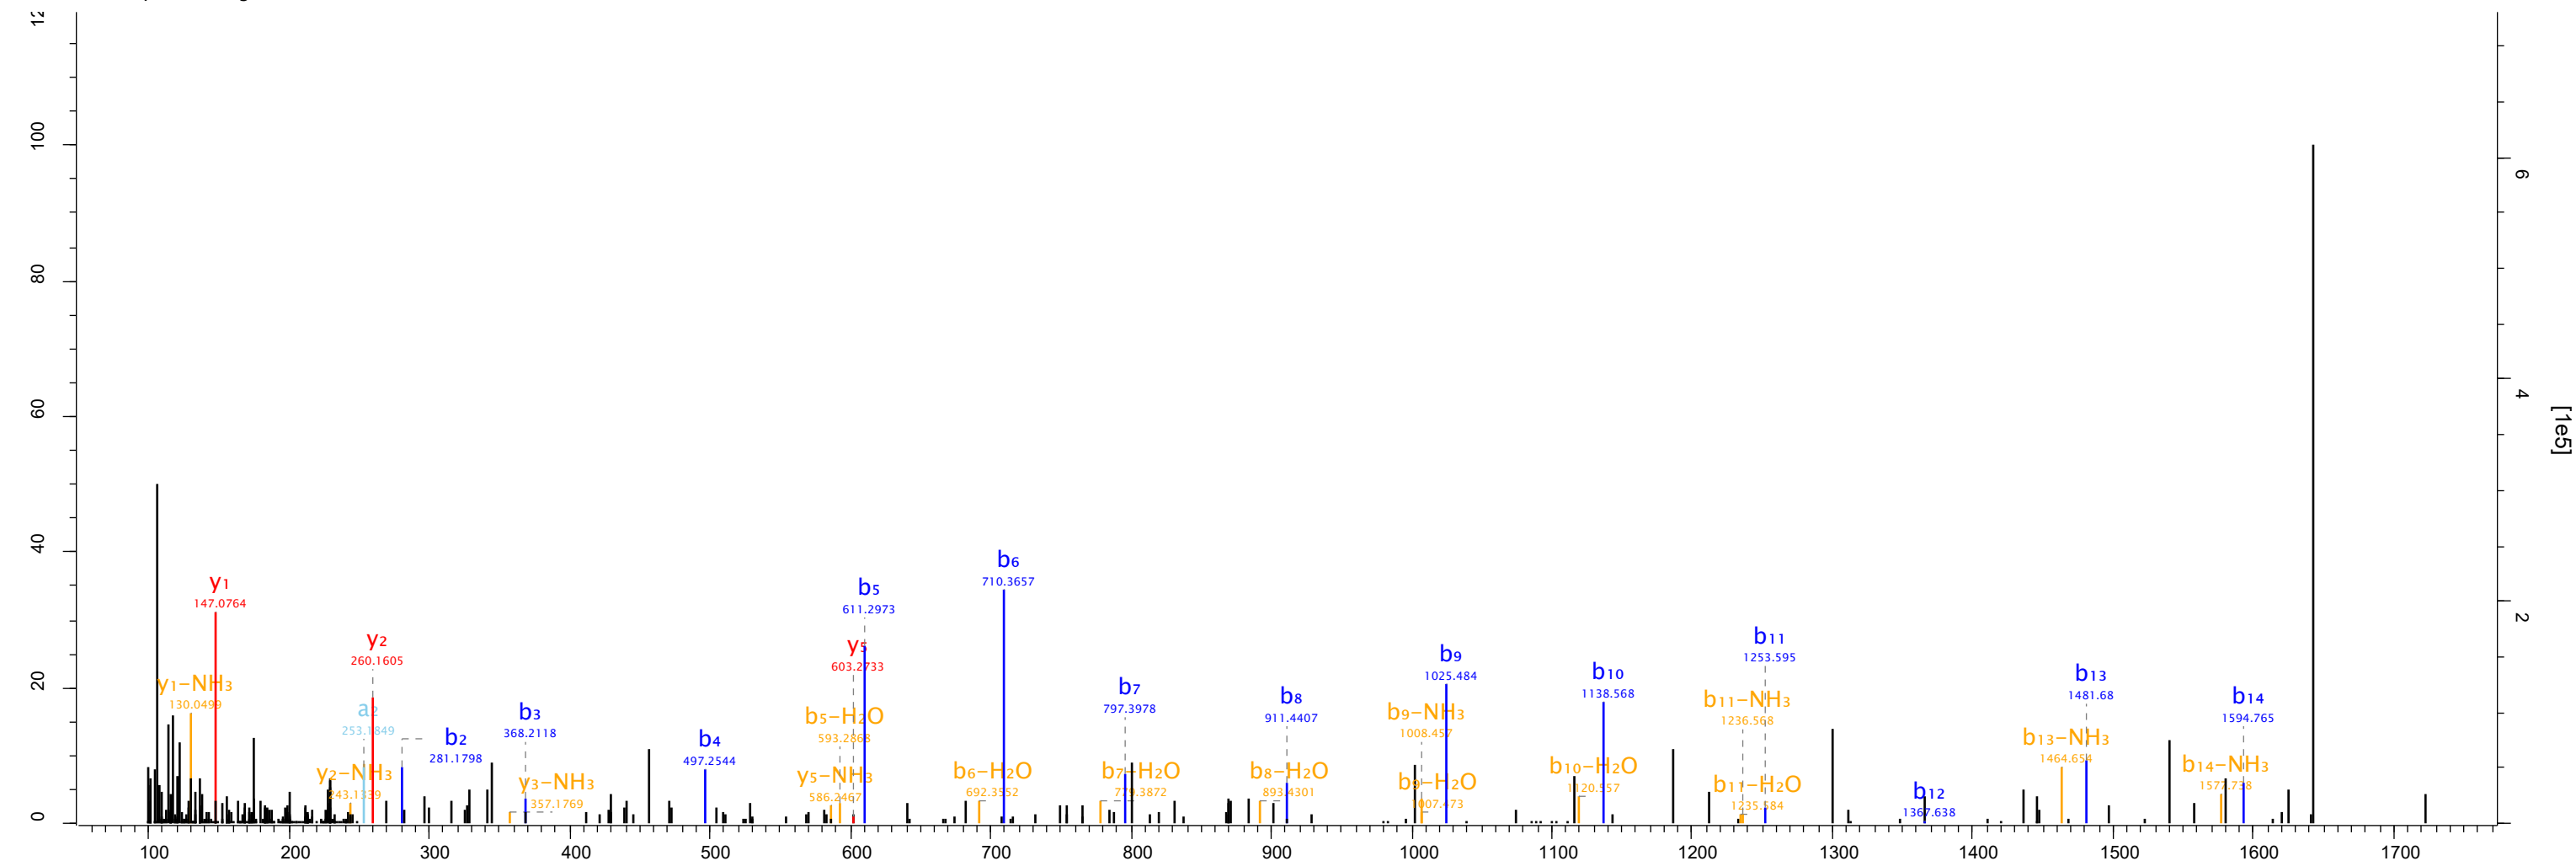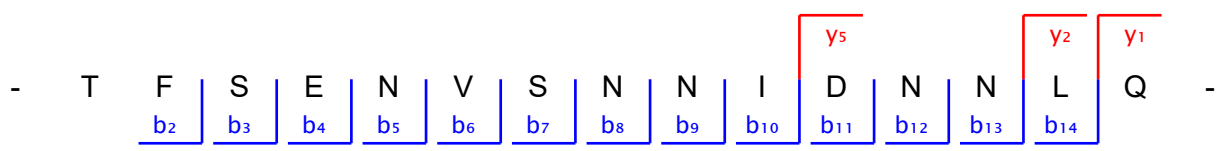

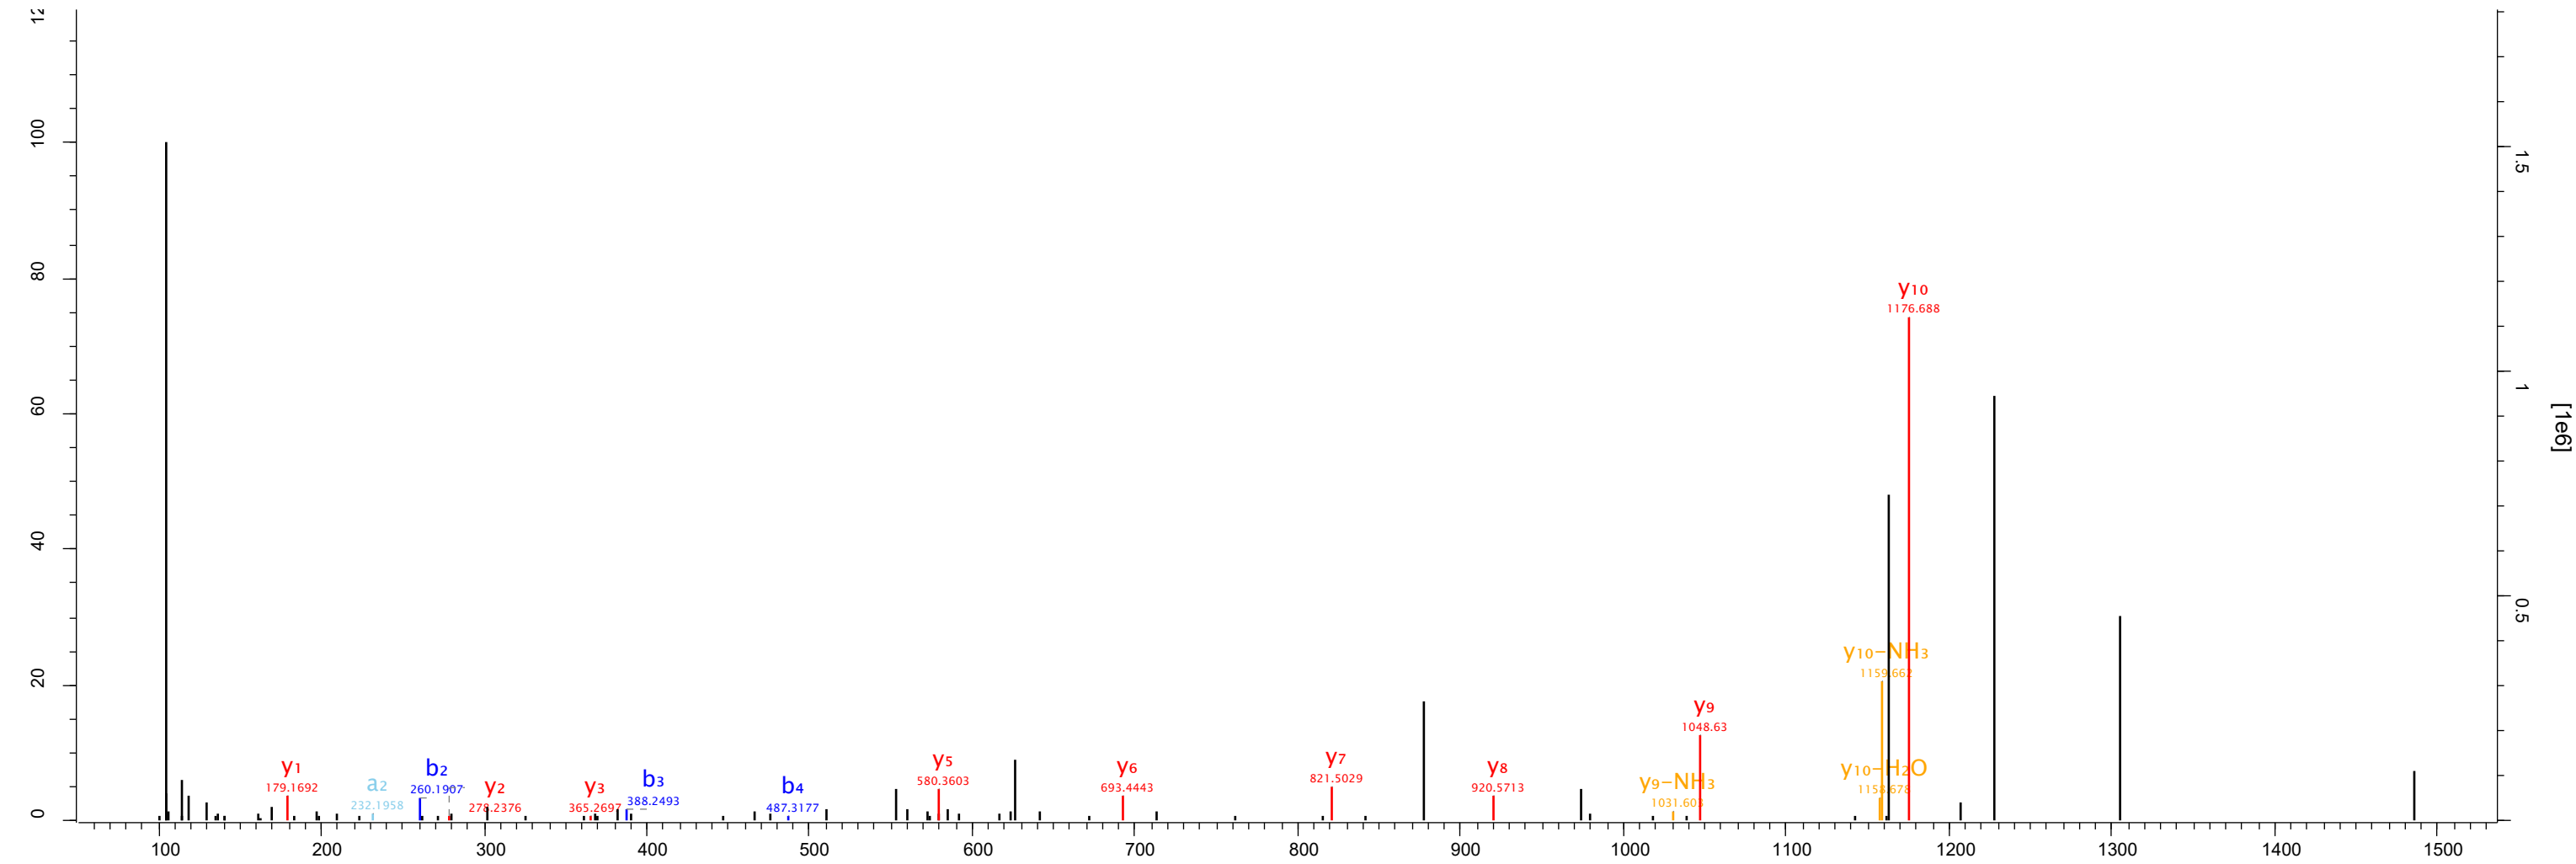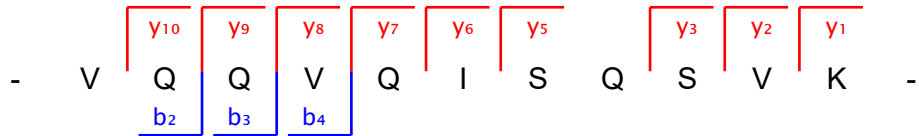

Raw file

Scan 11526 Method FTMS; HCD Score 57.48 m/z 419.23

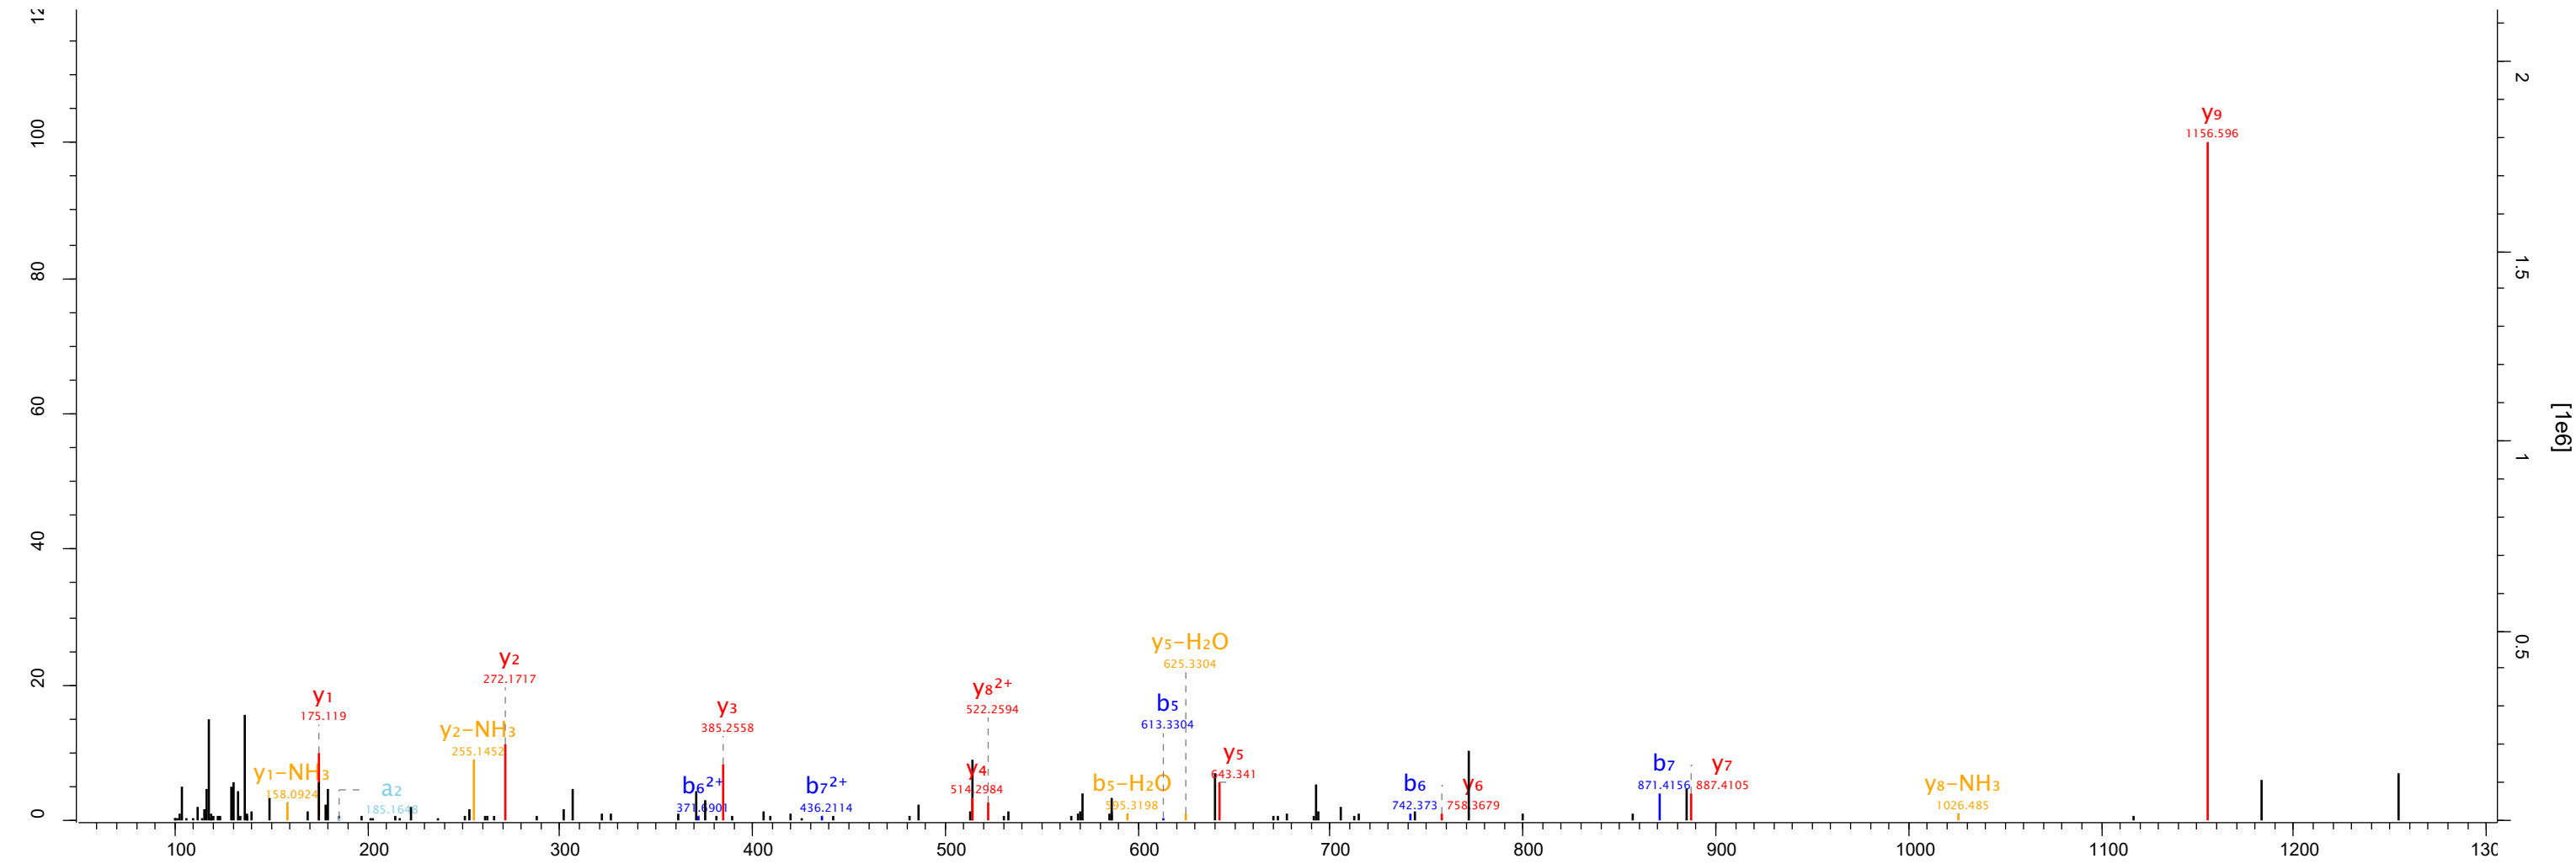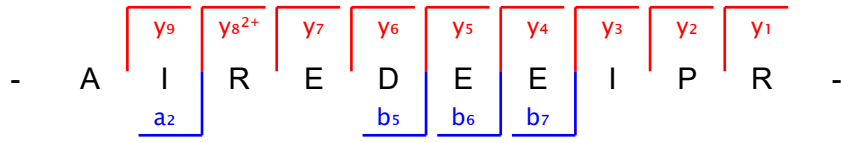

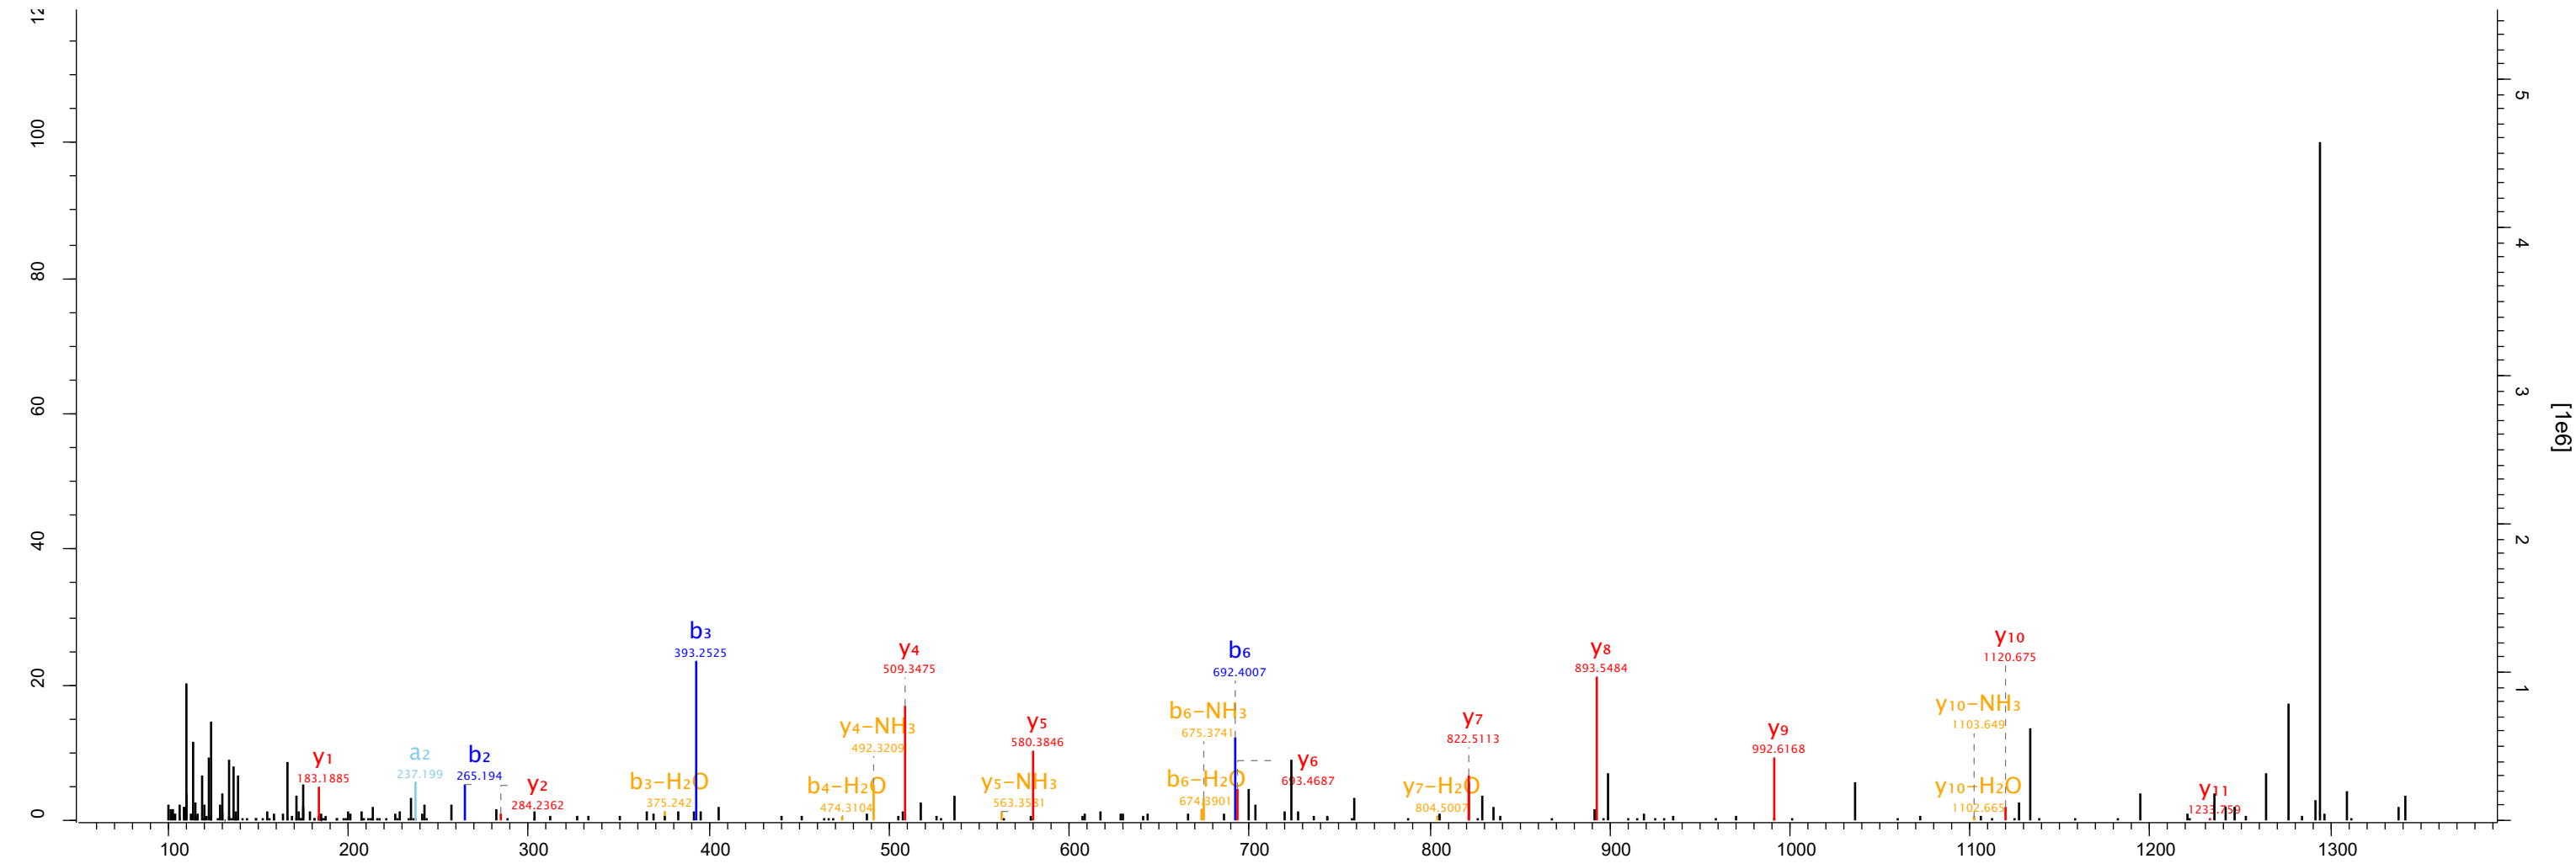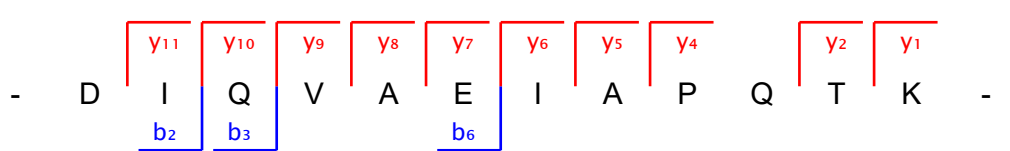

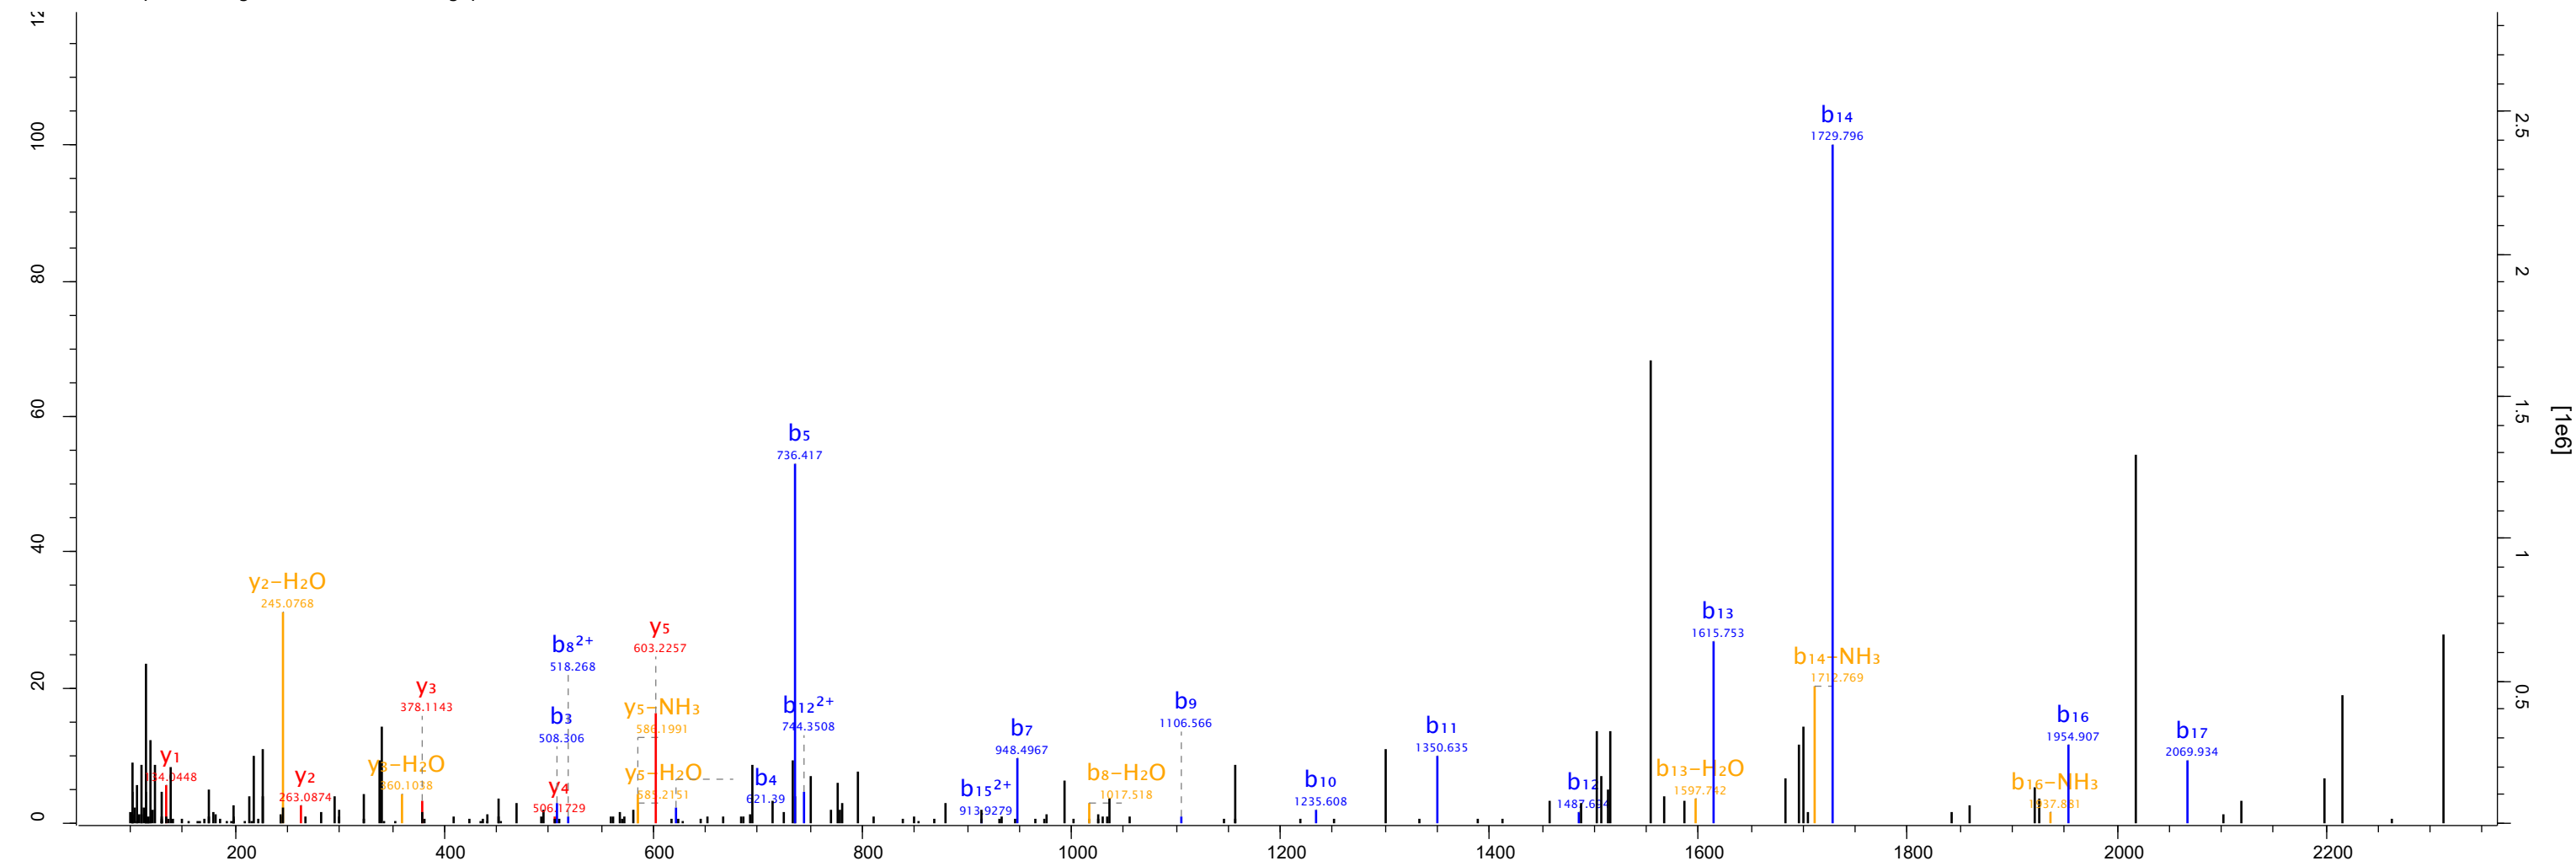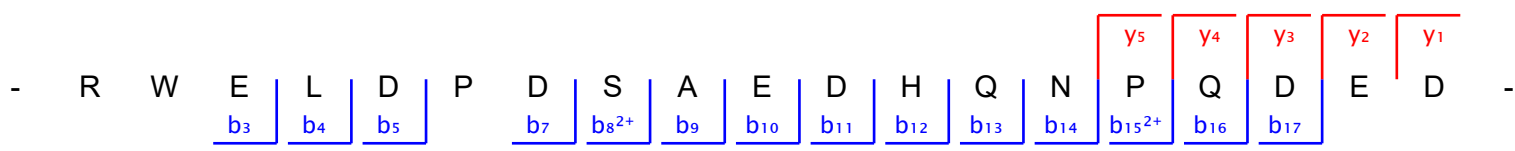

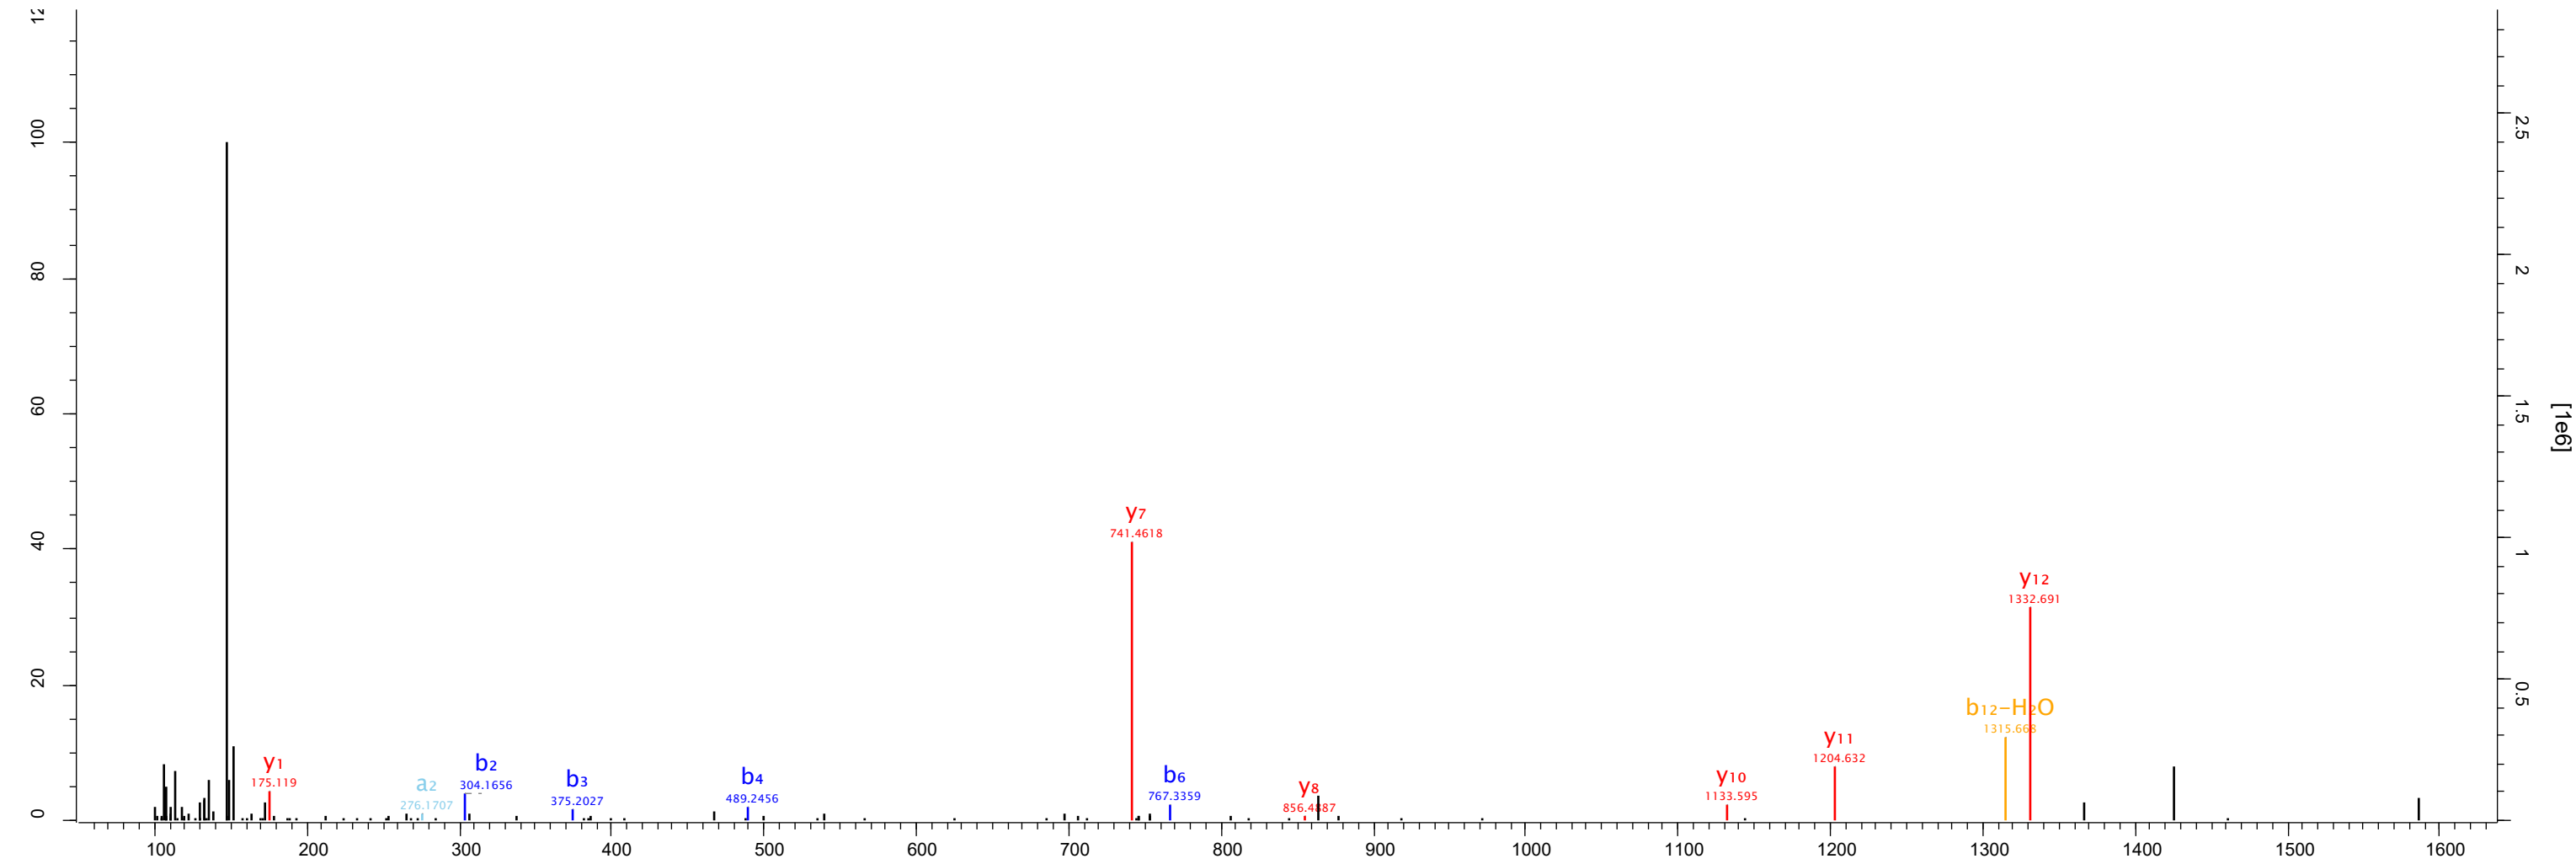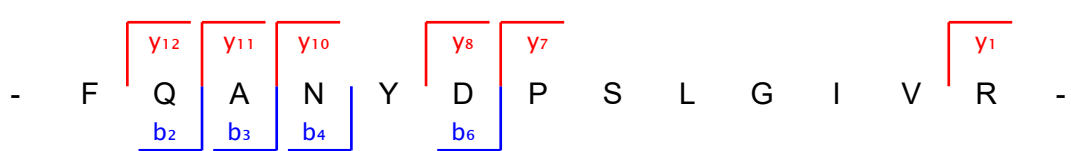



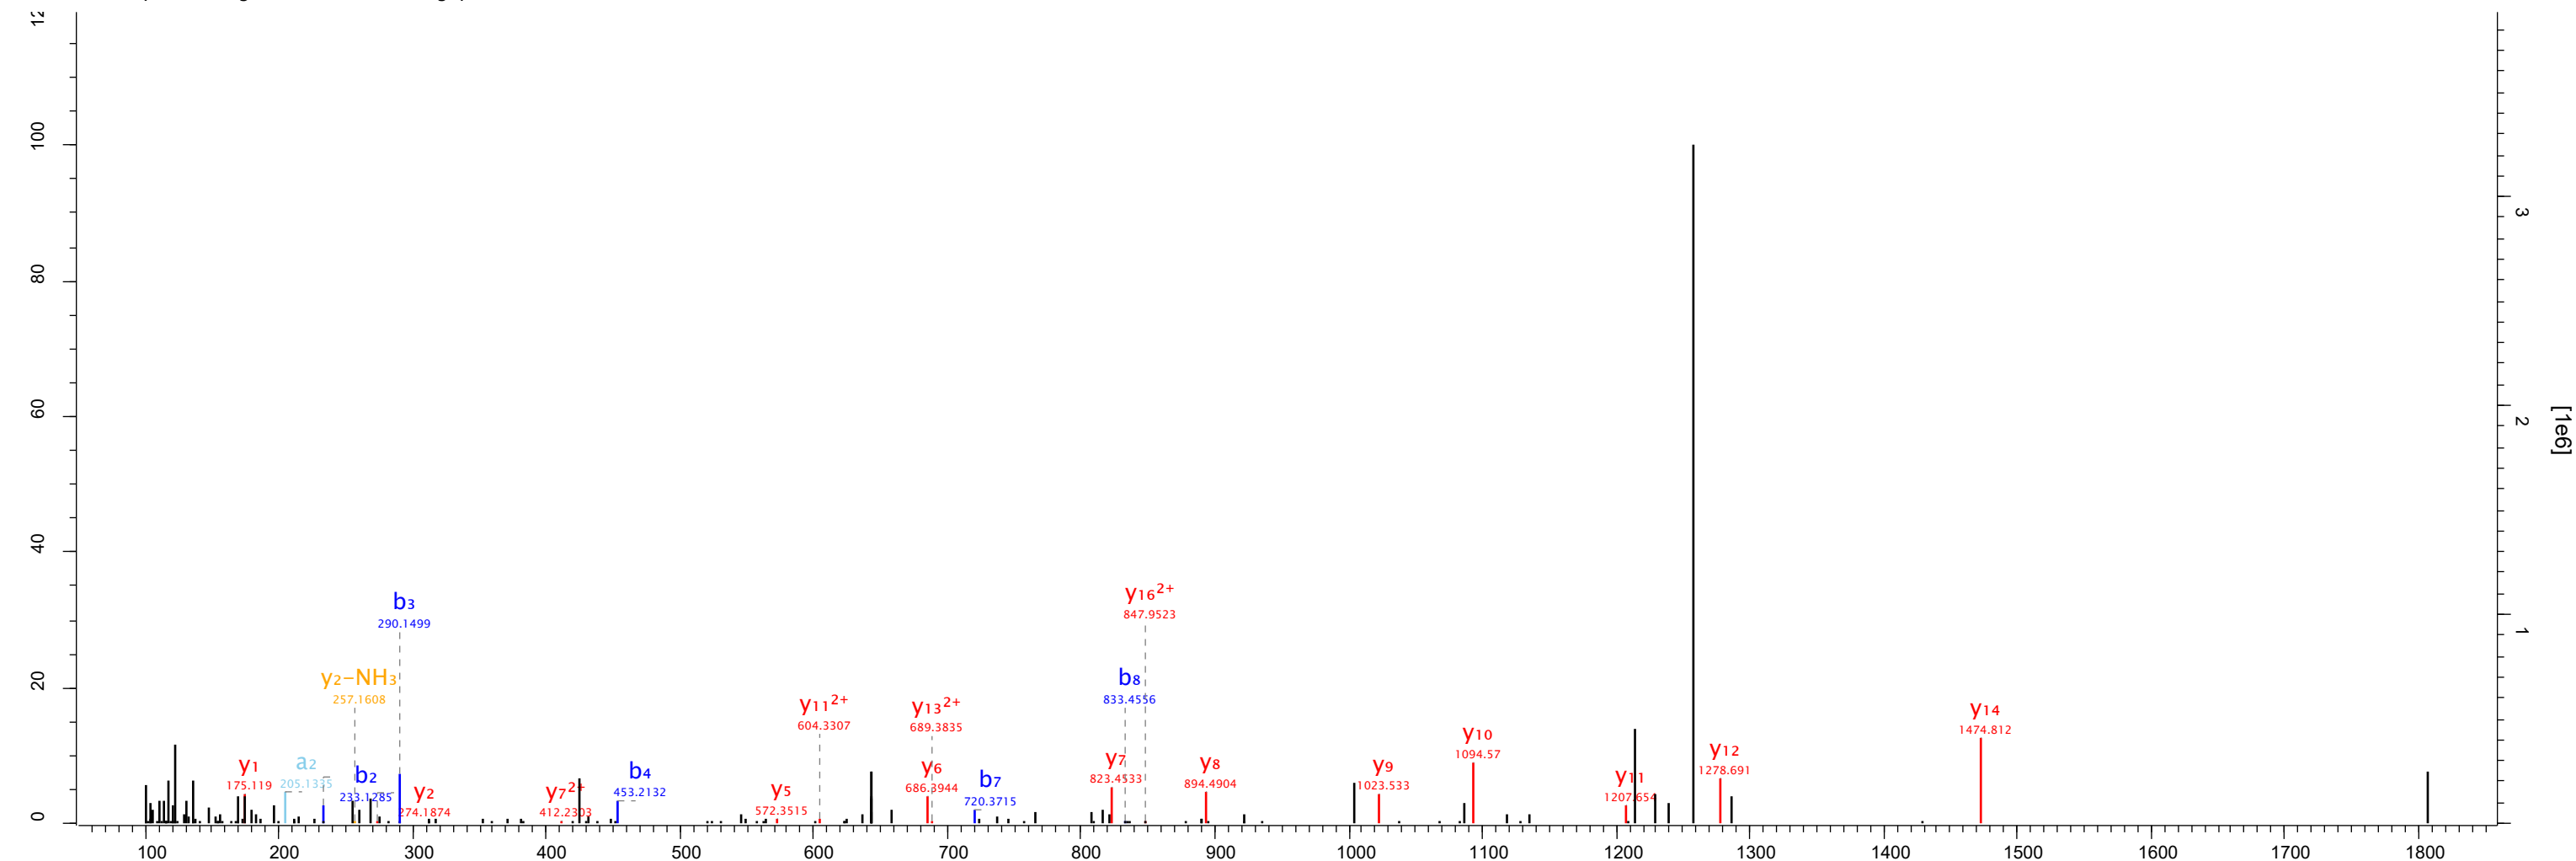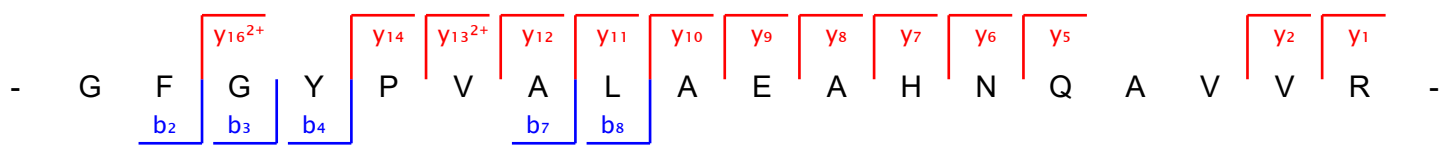

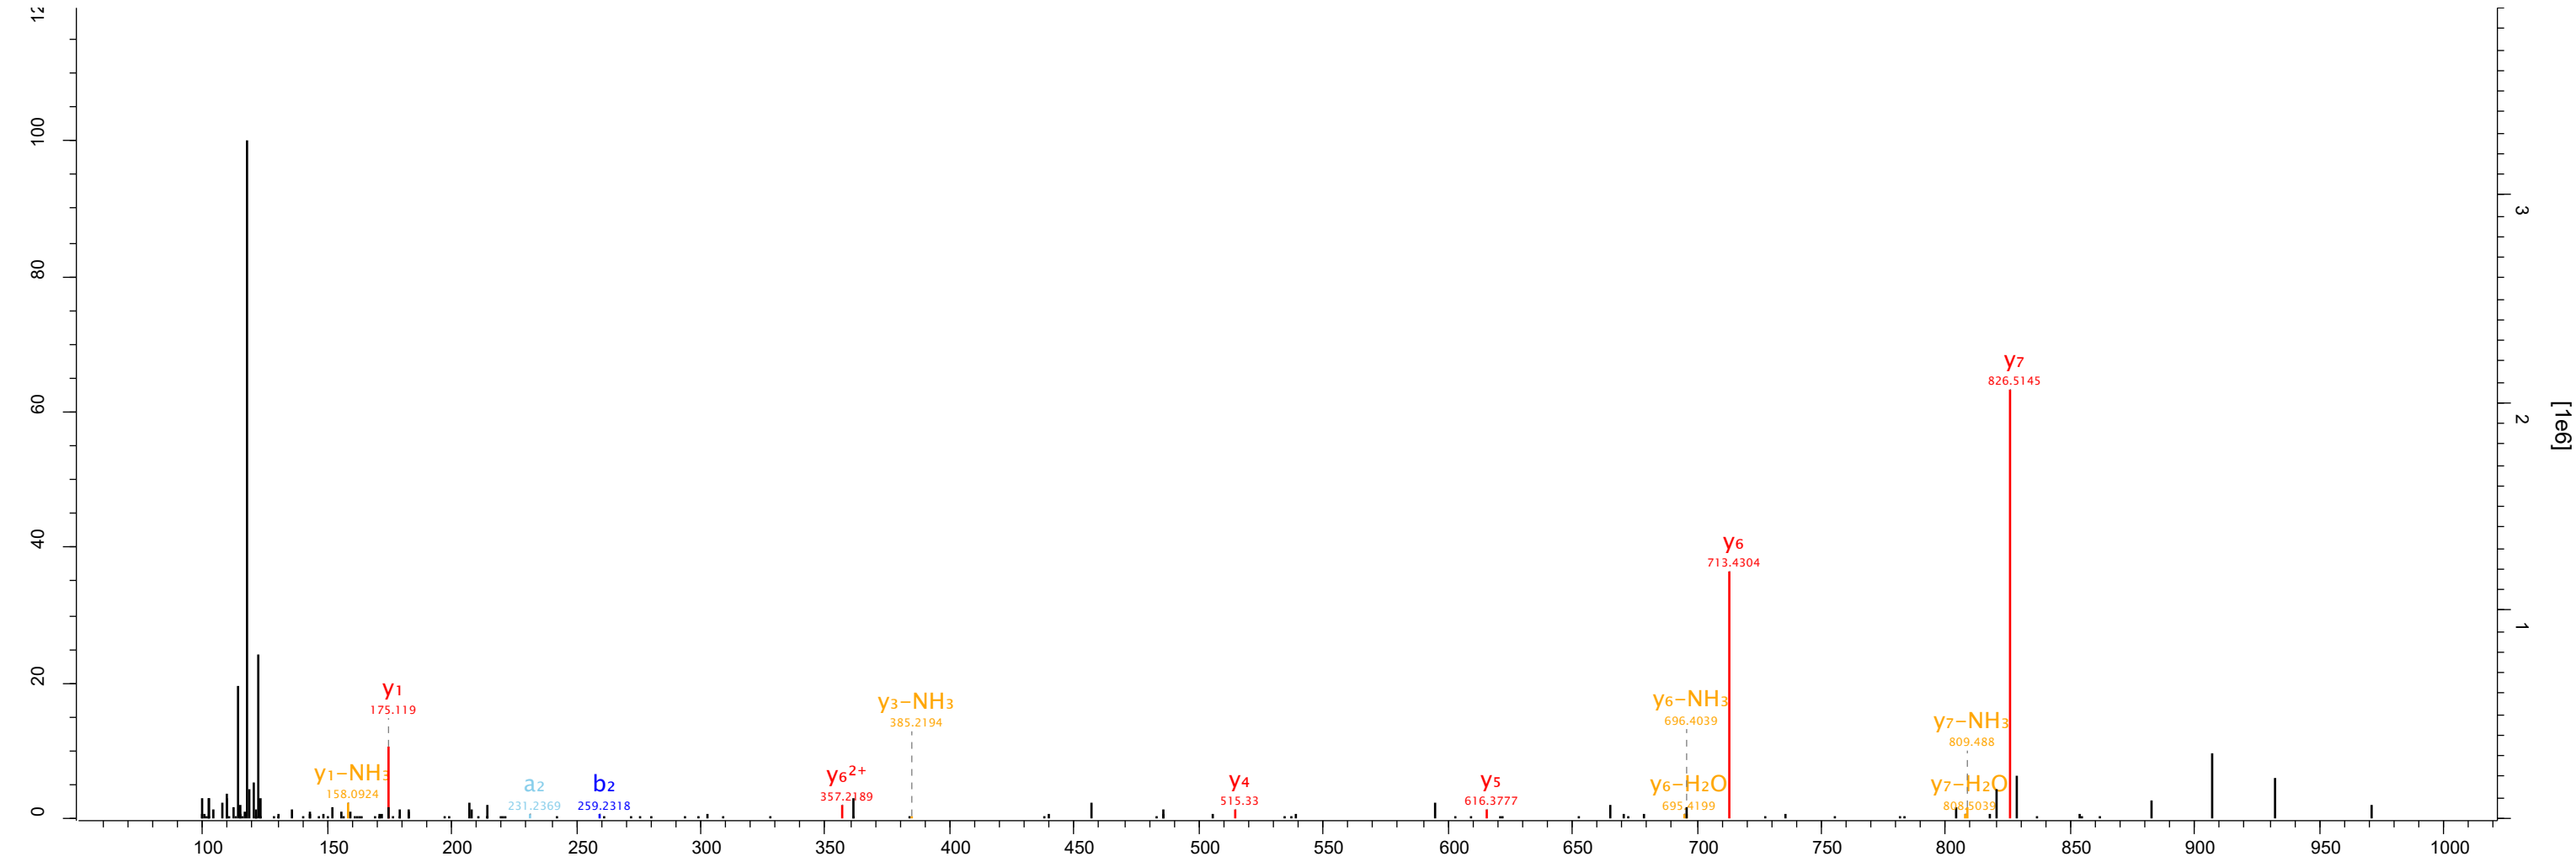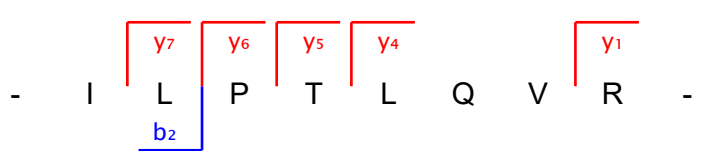

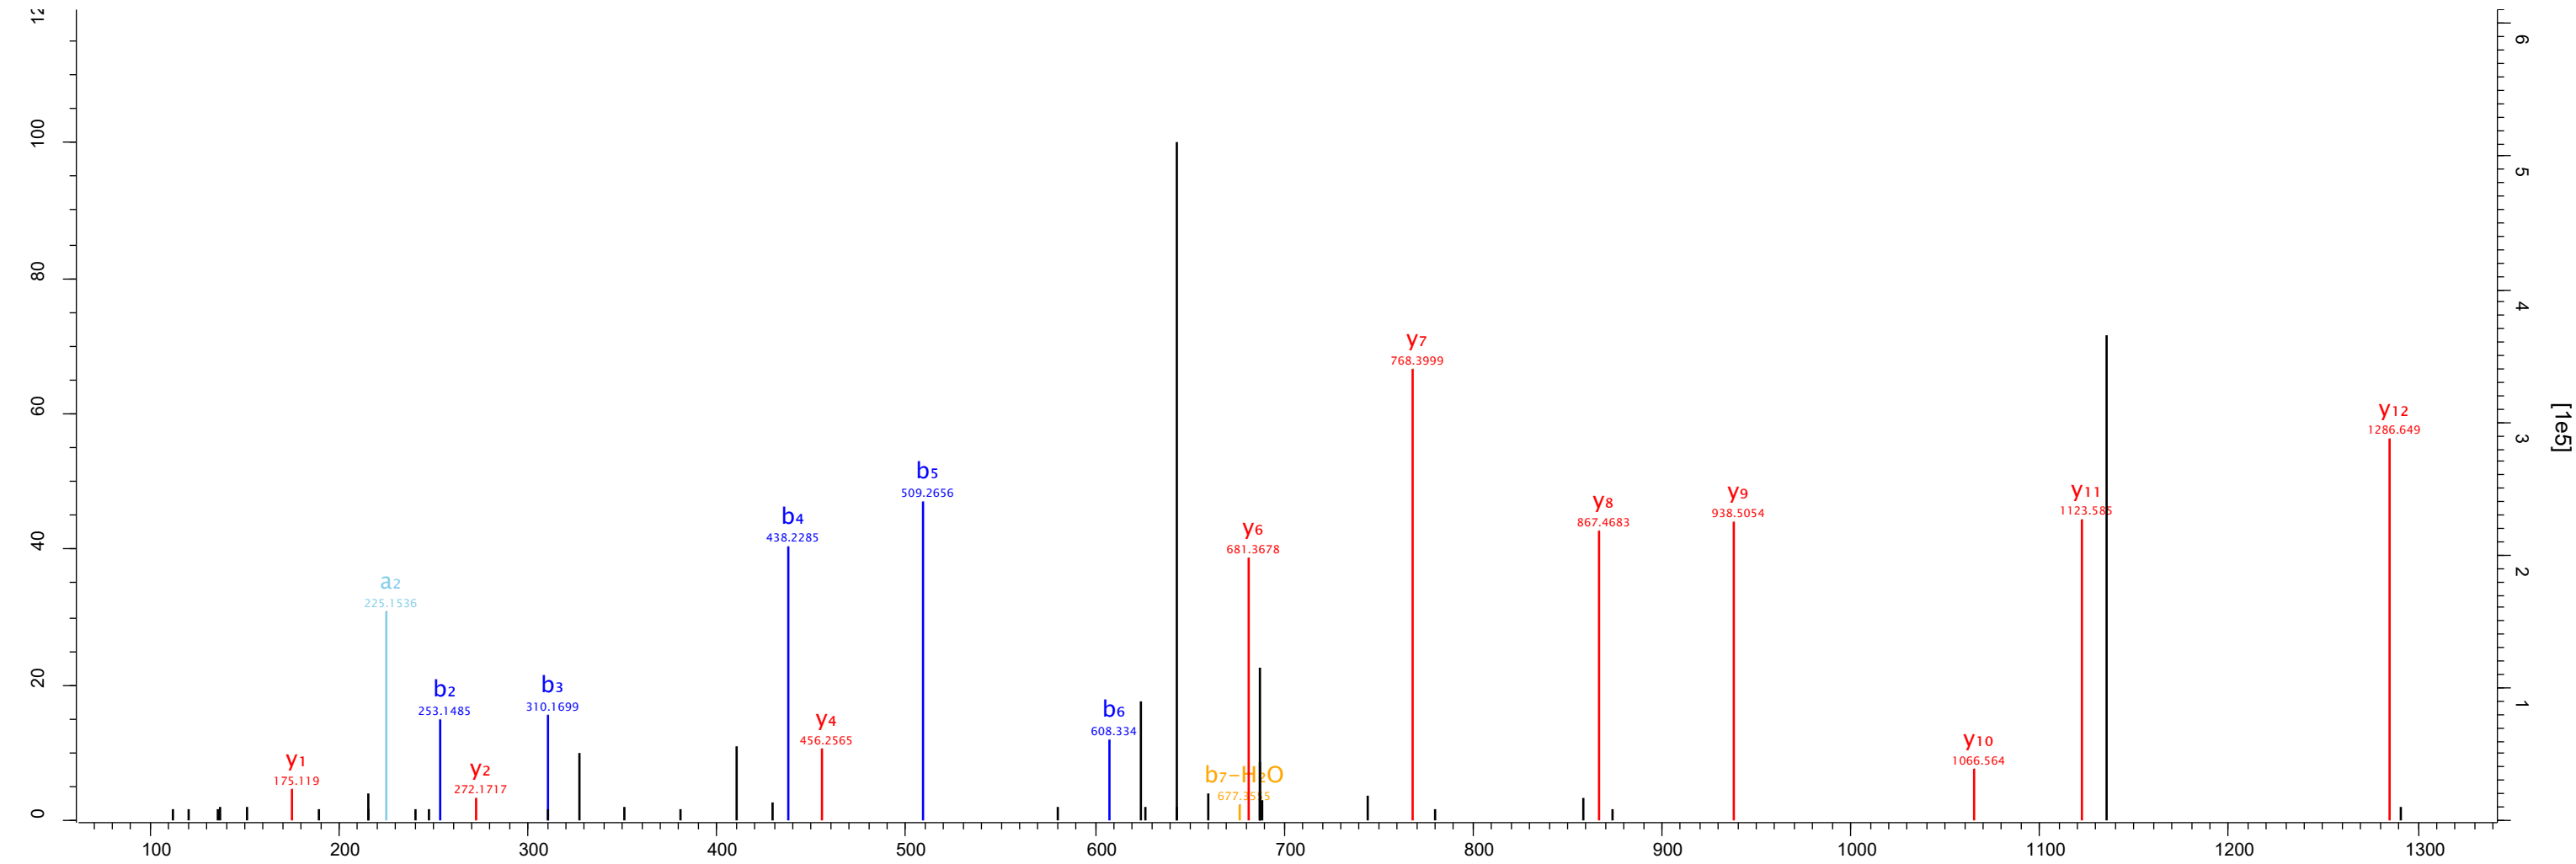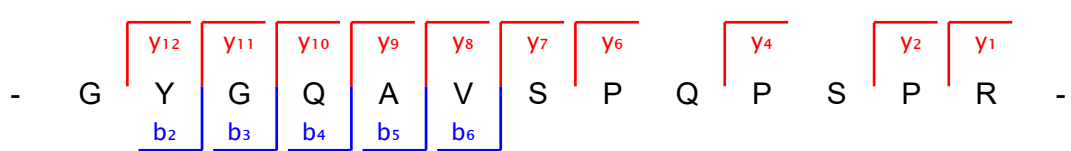

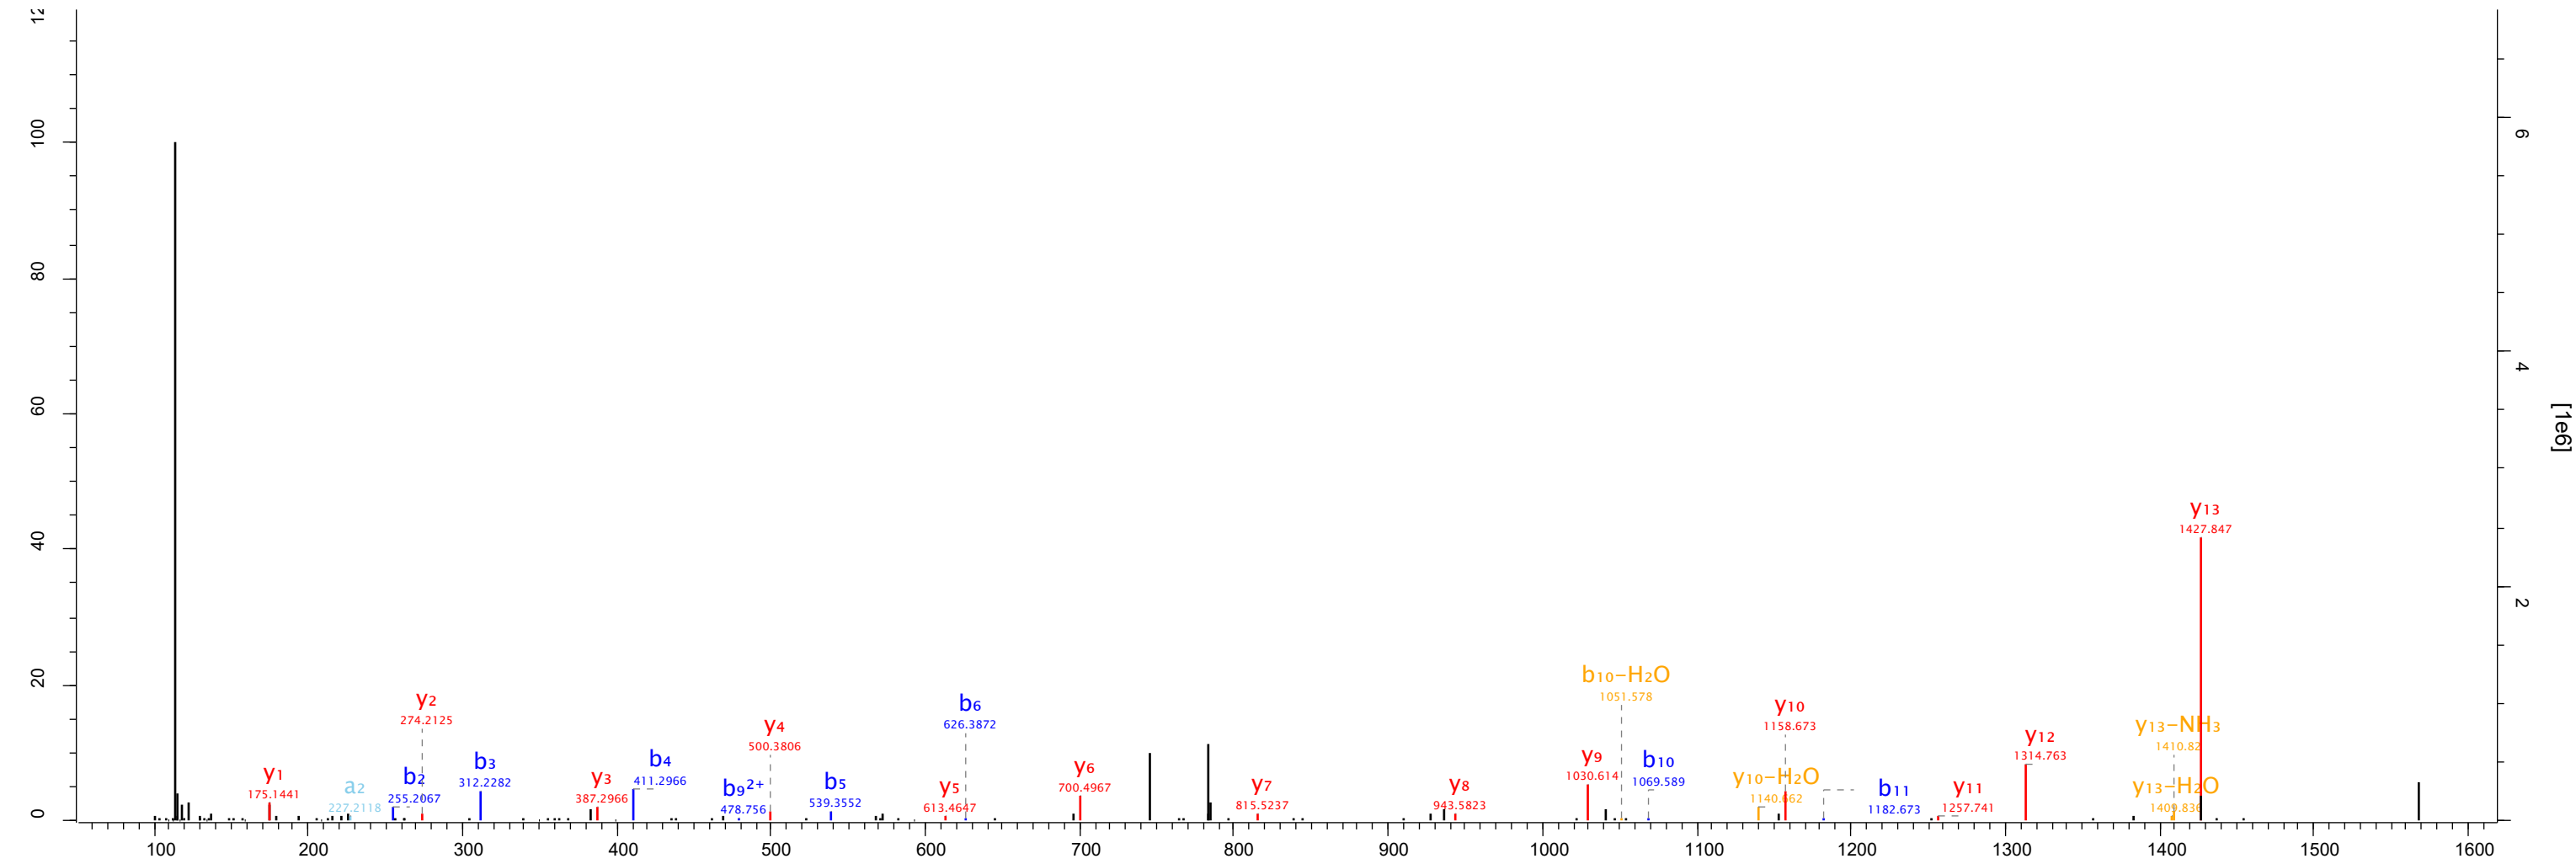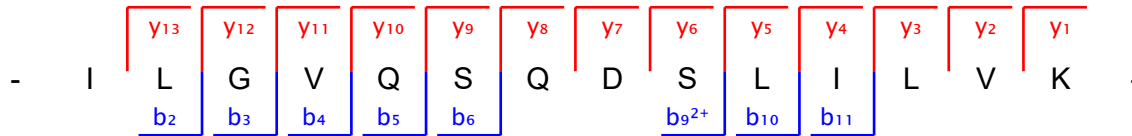

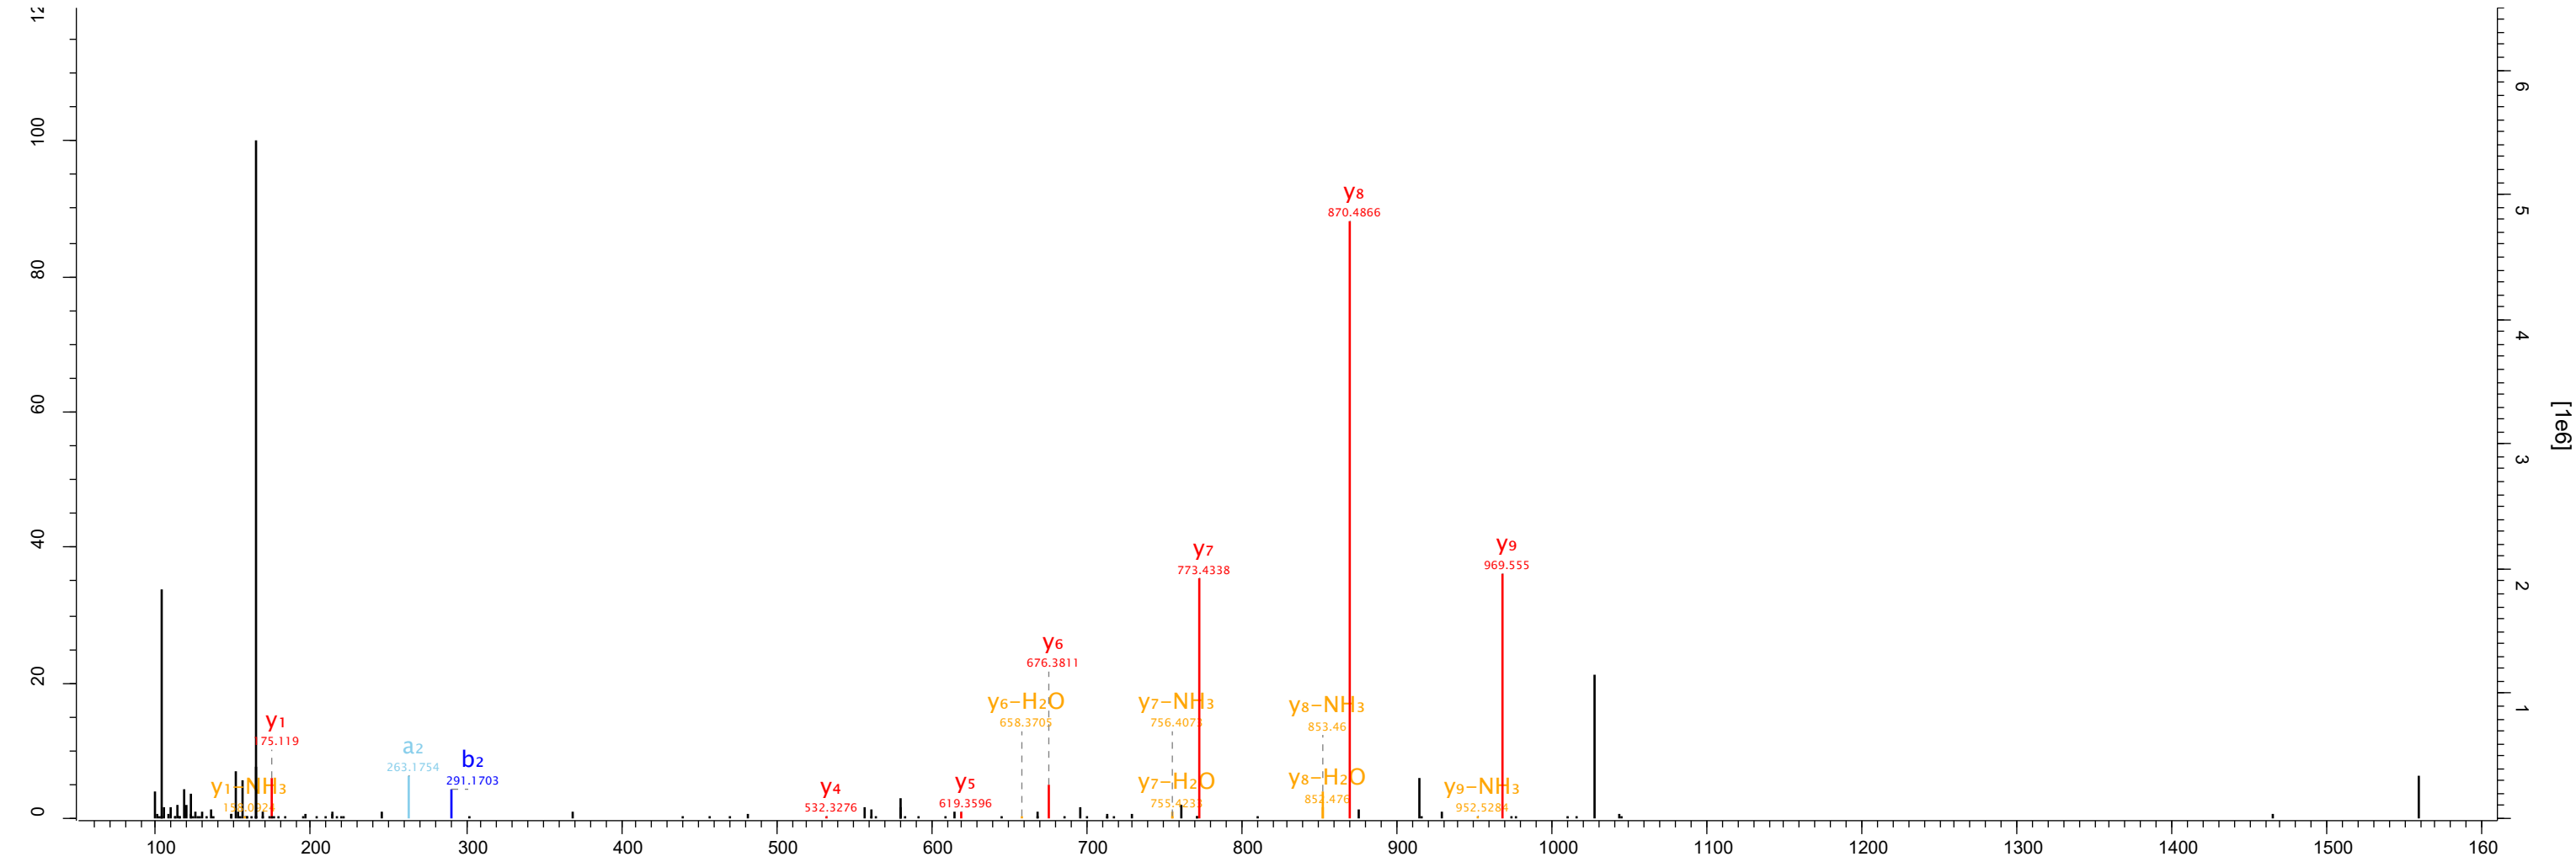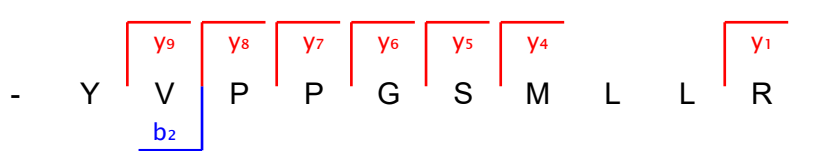

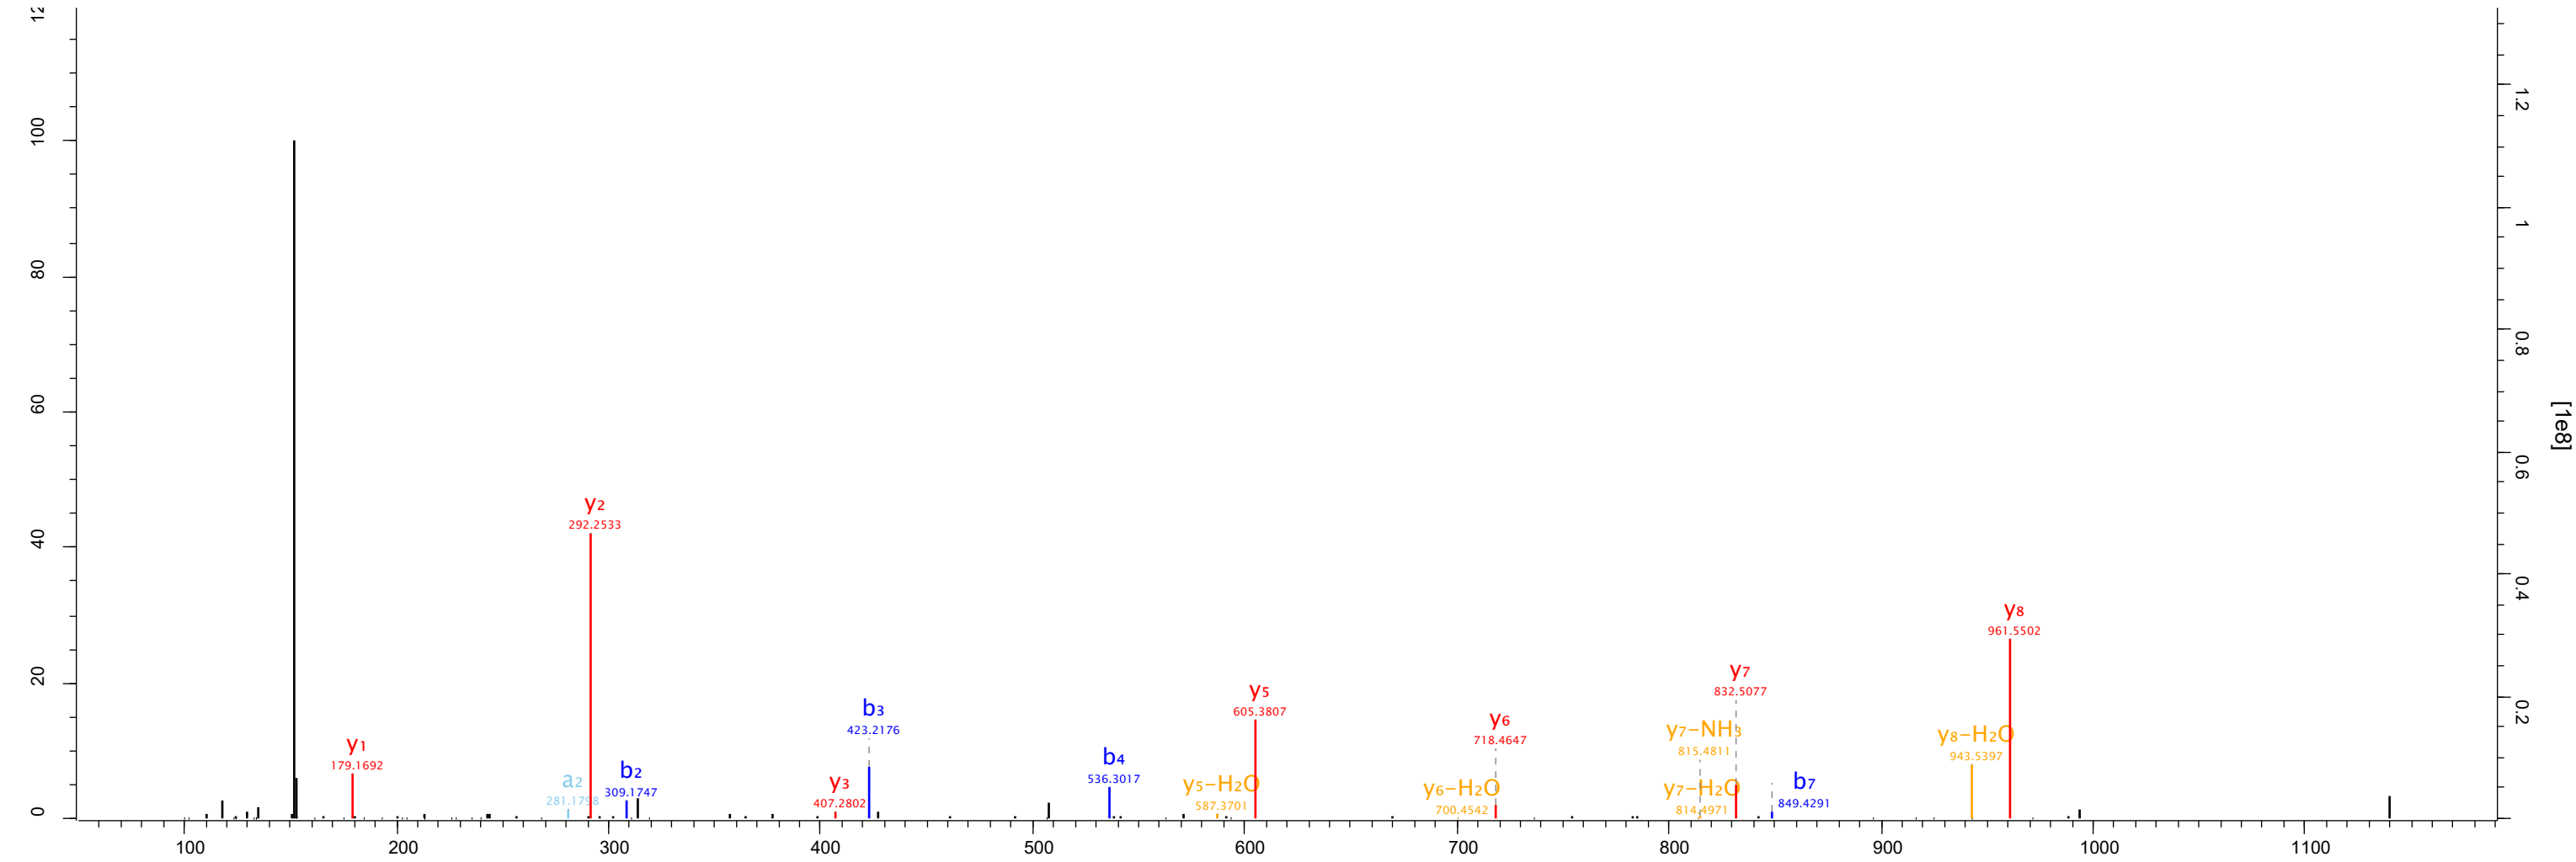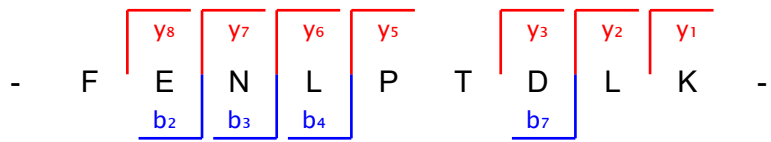

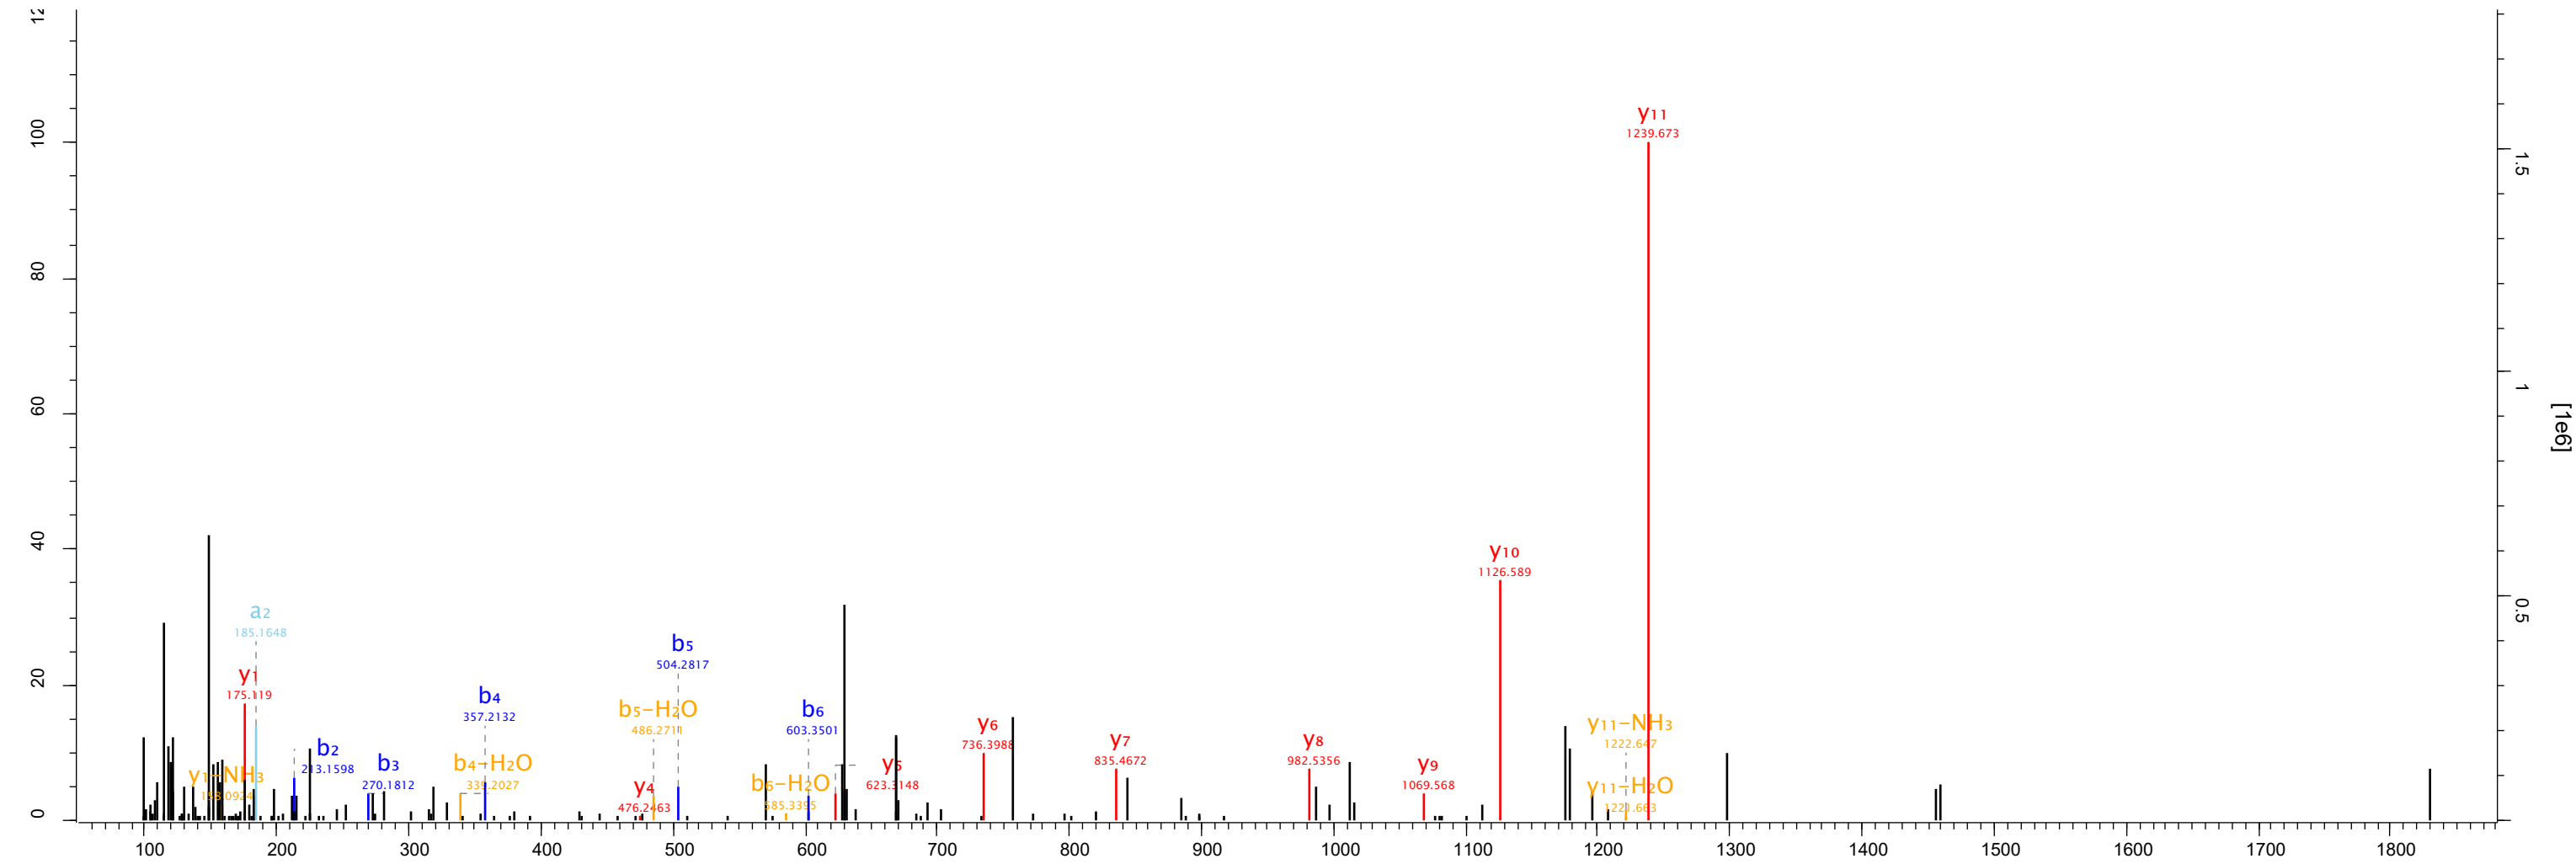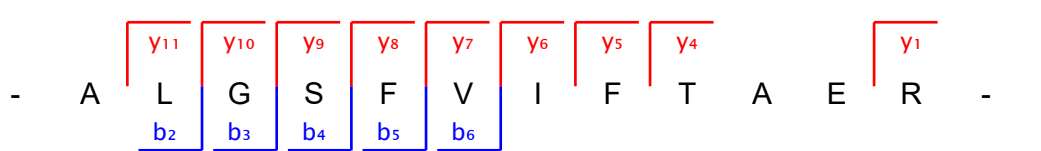

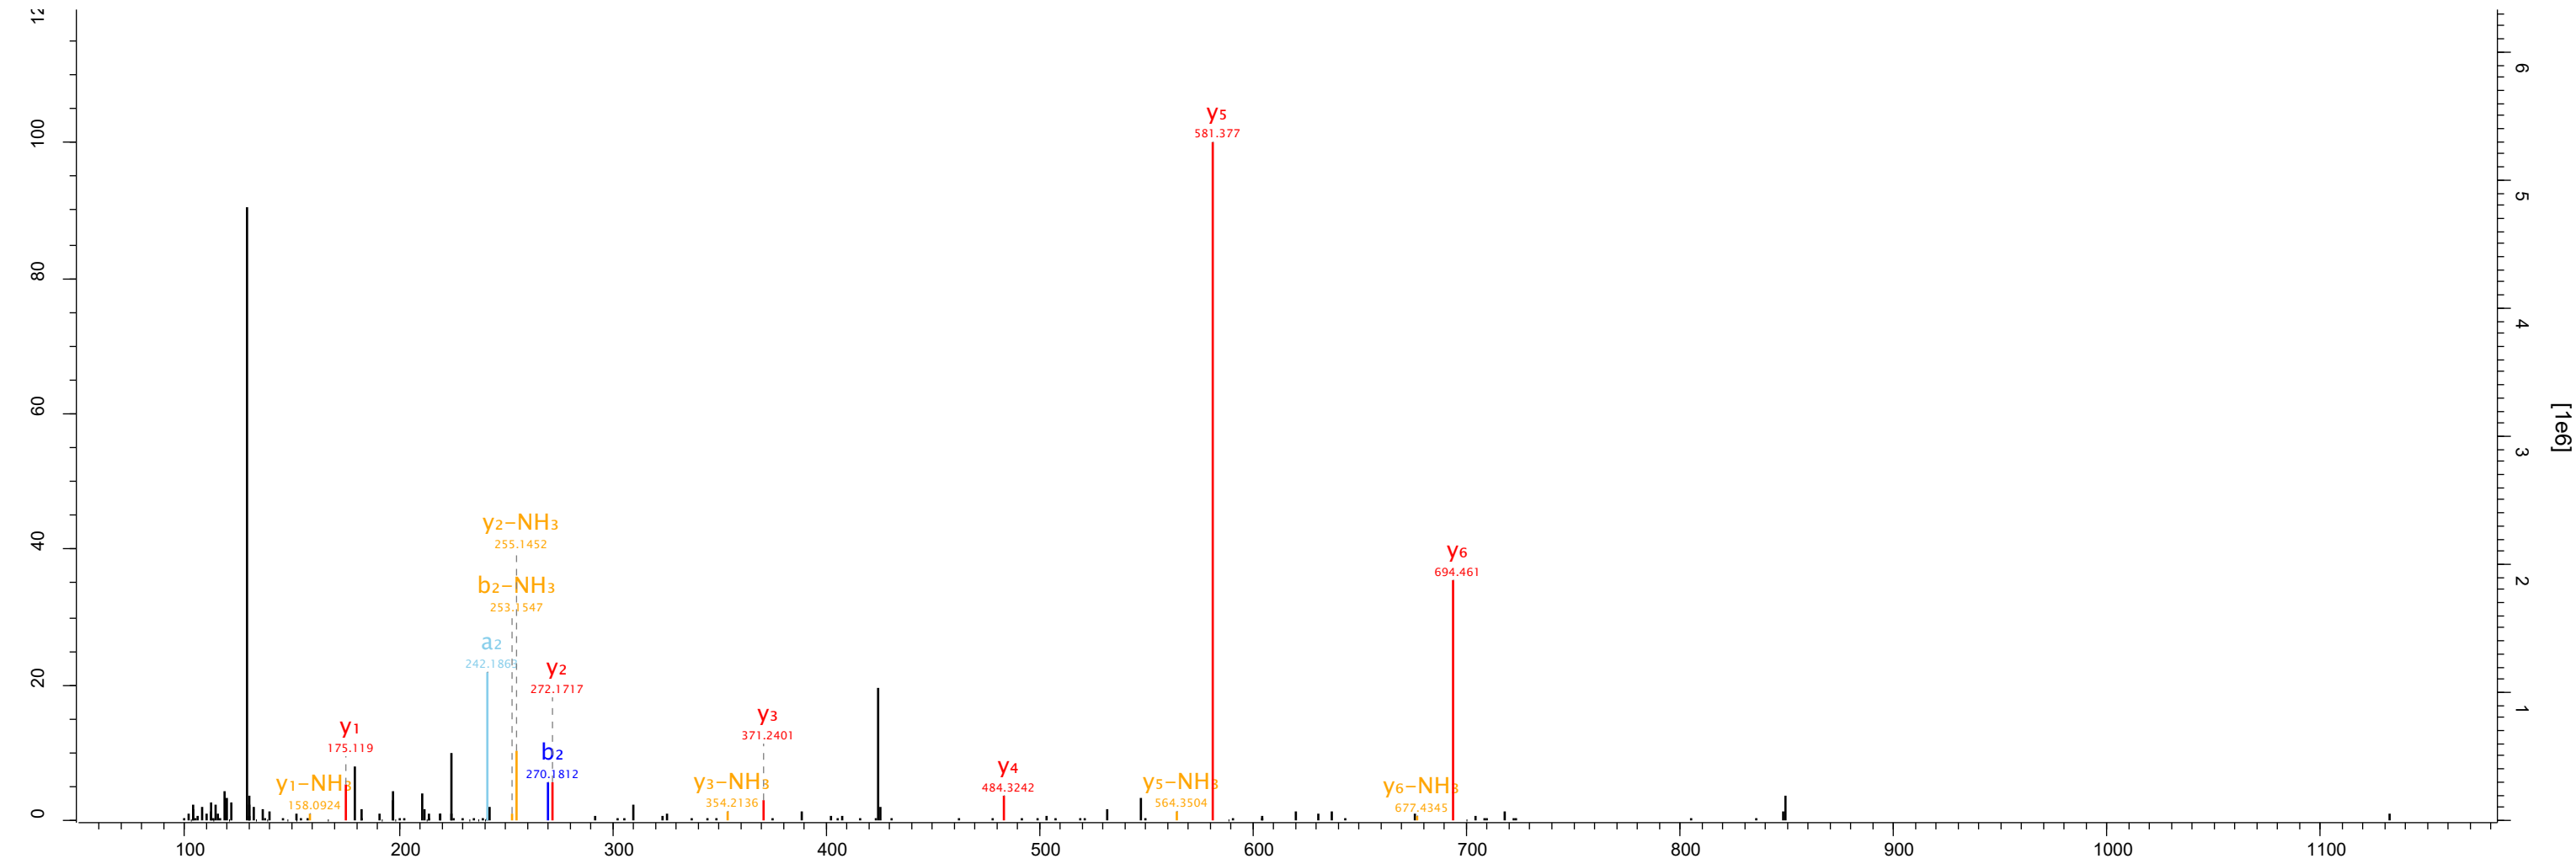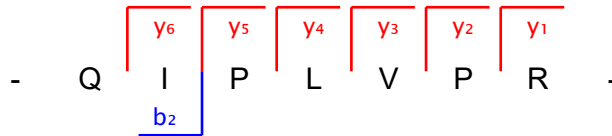



Raw file

Scan 25585 Method FTMS; HCD Score 84.51 m/z 741.84

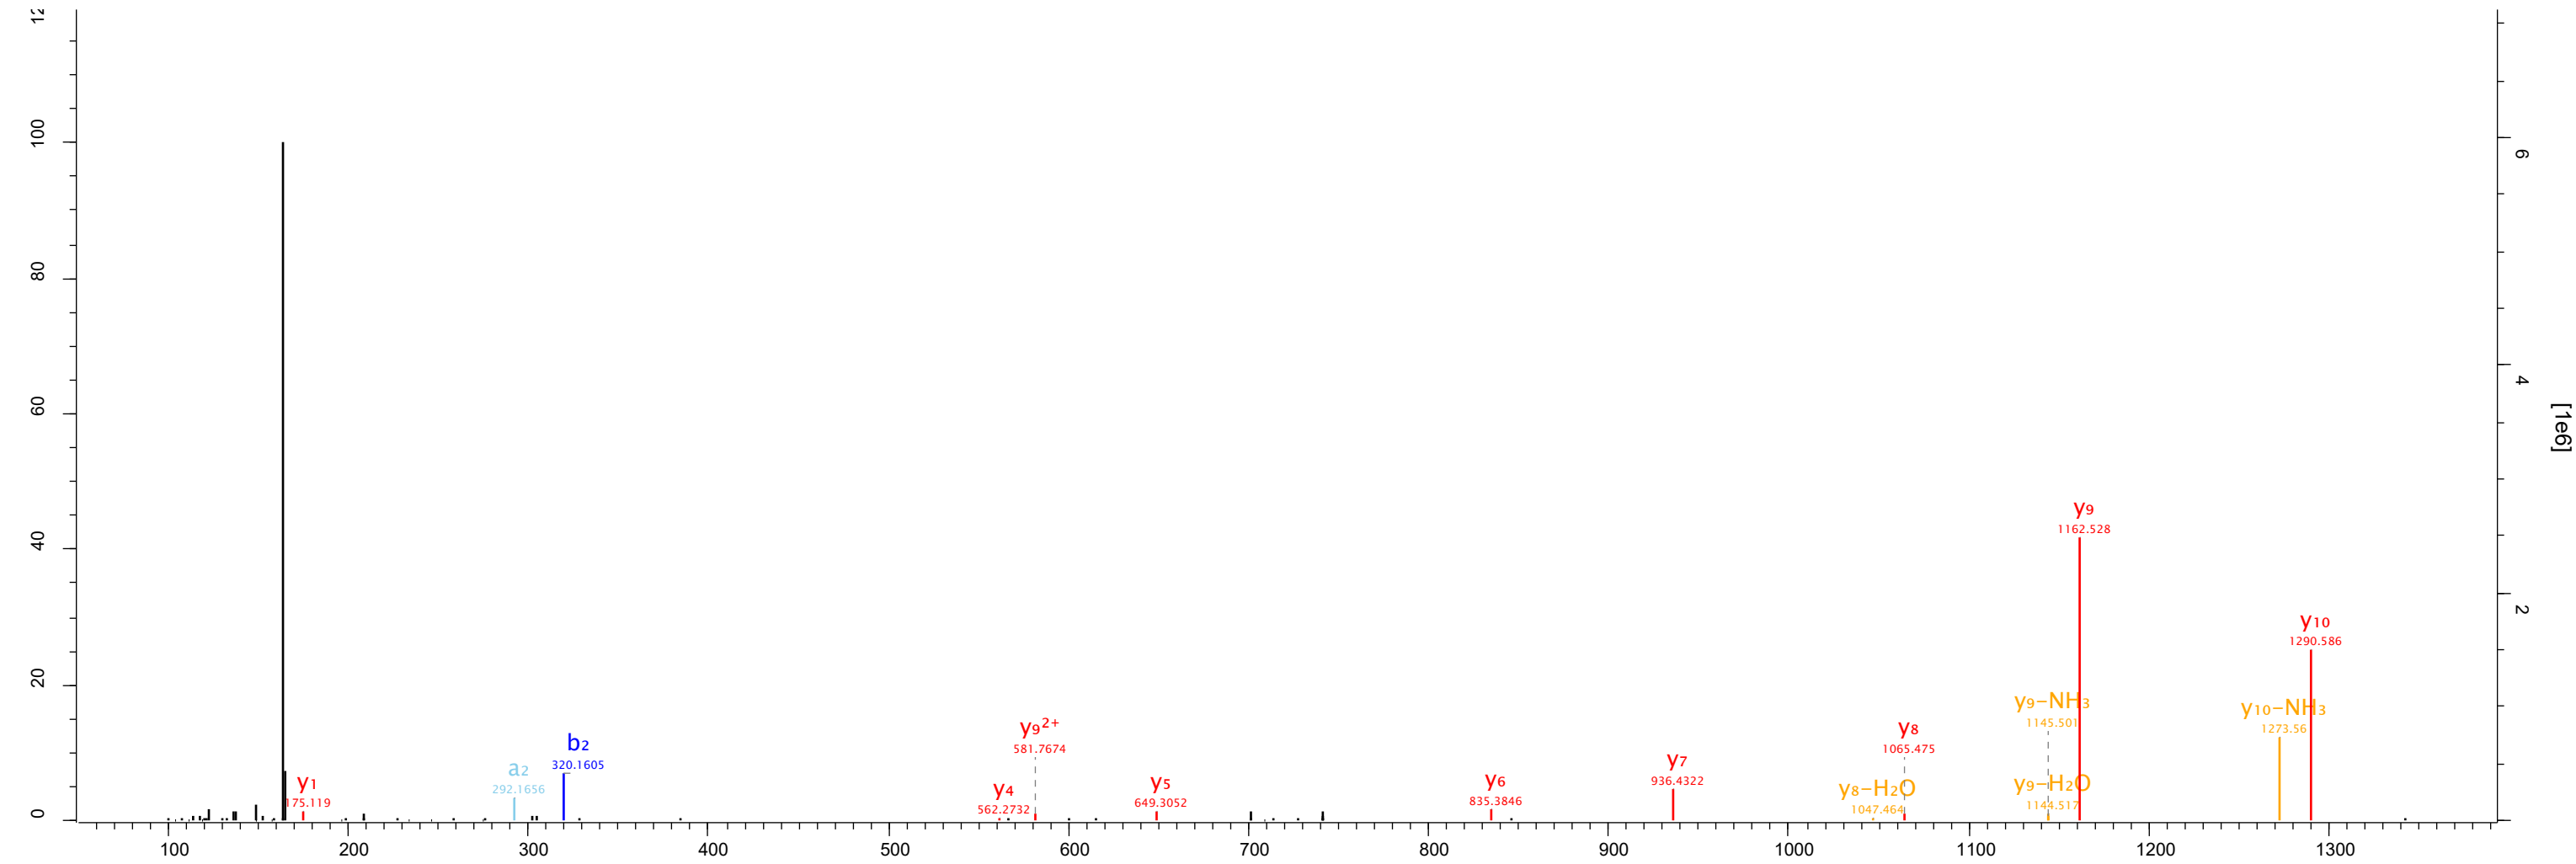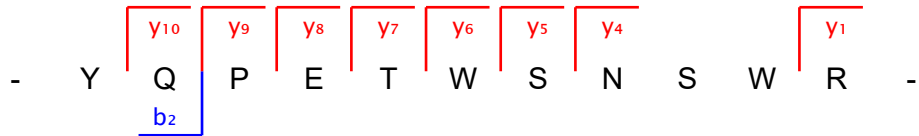

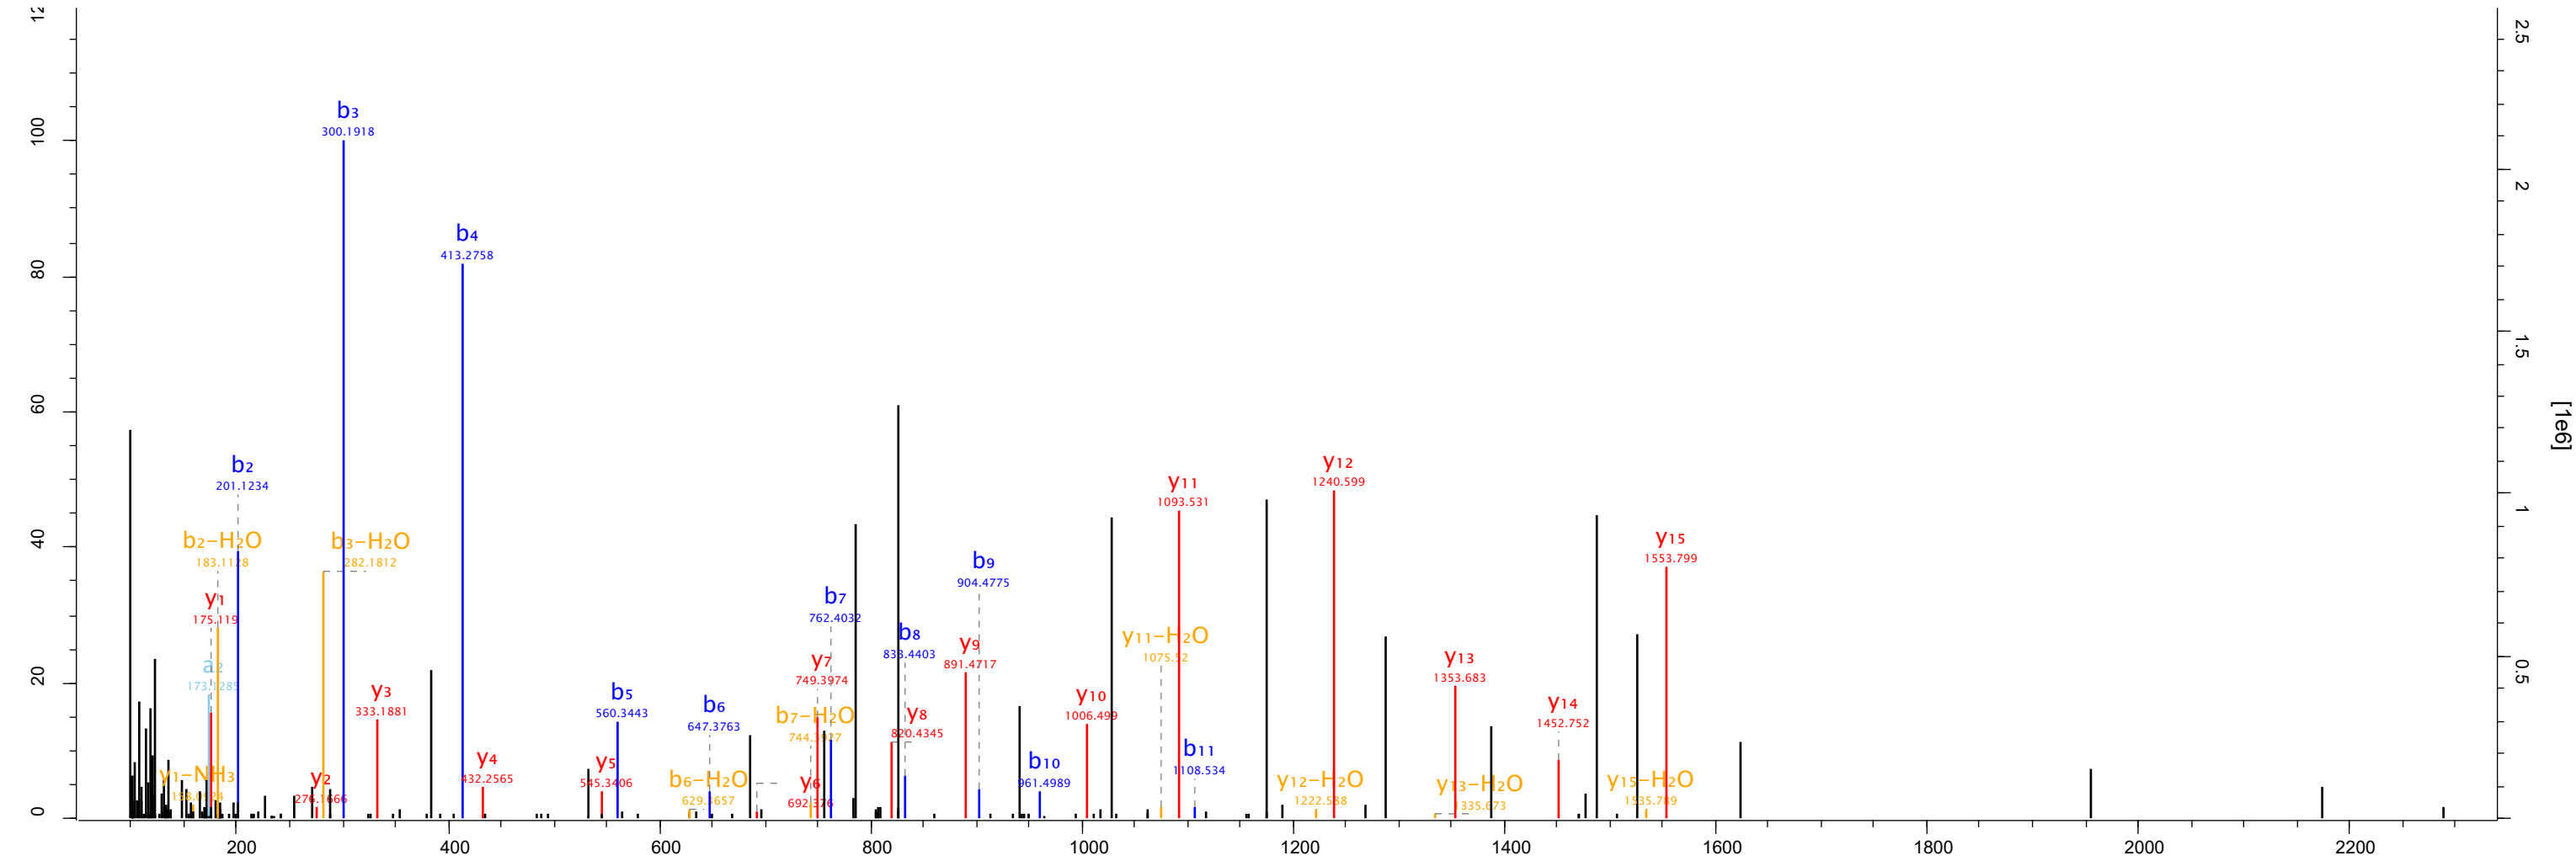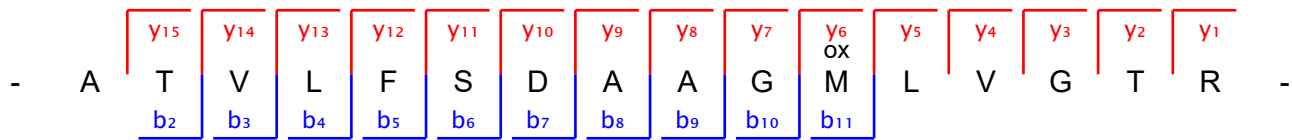

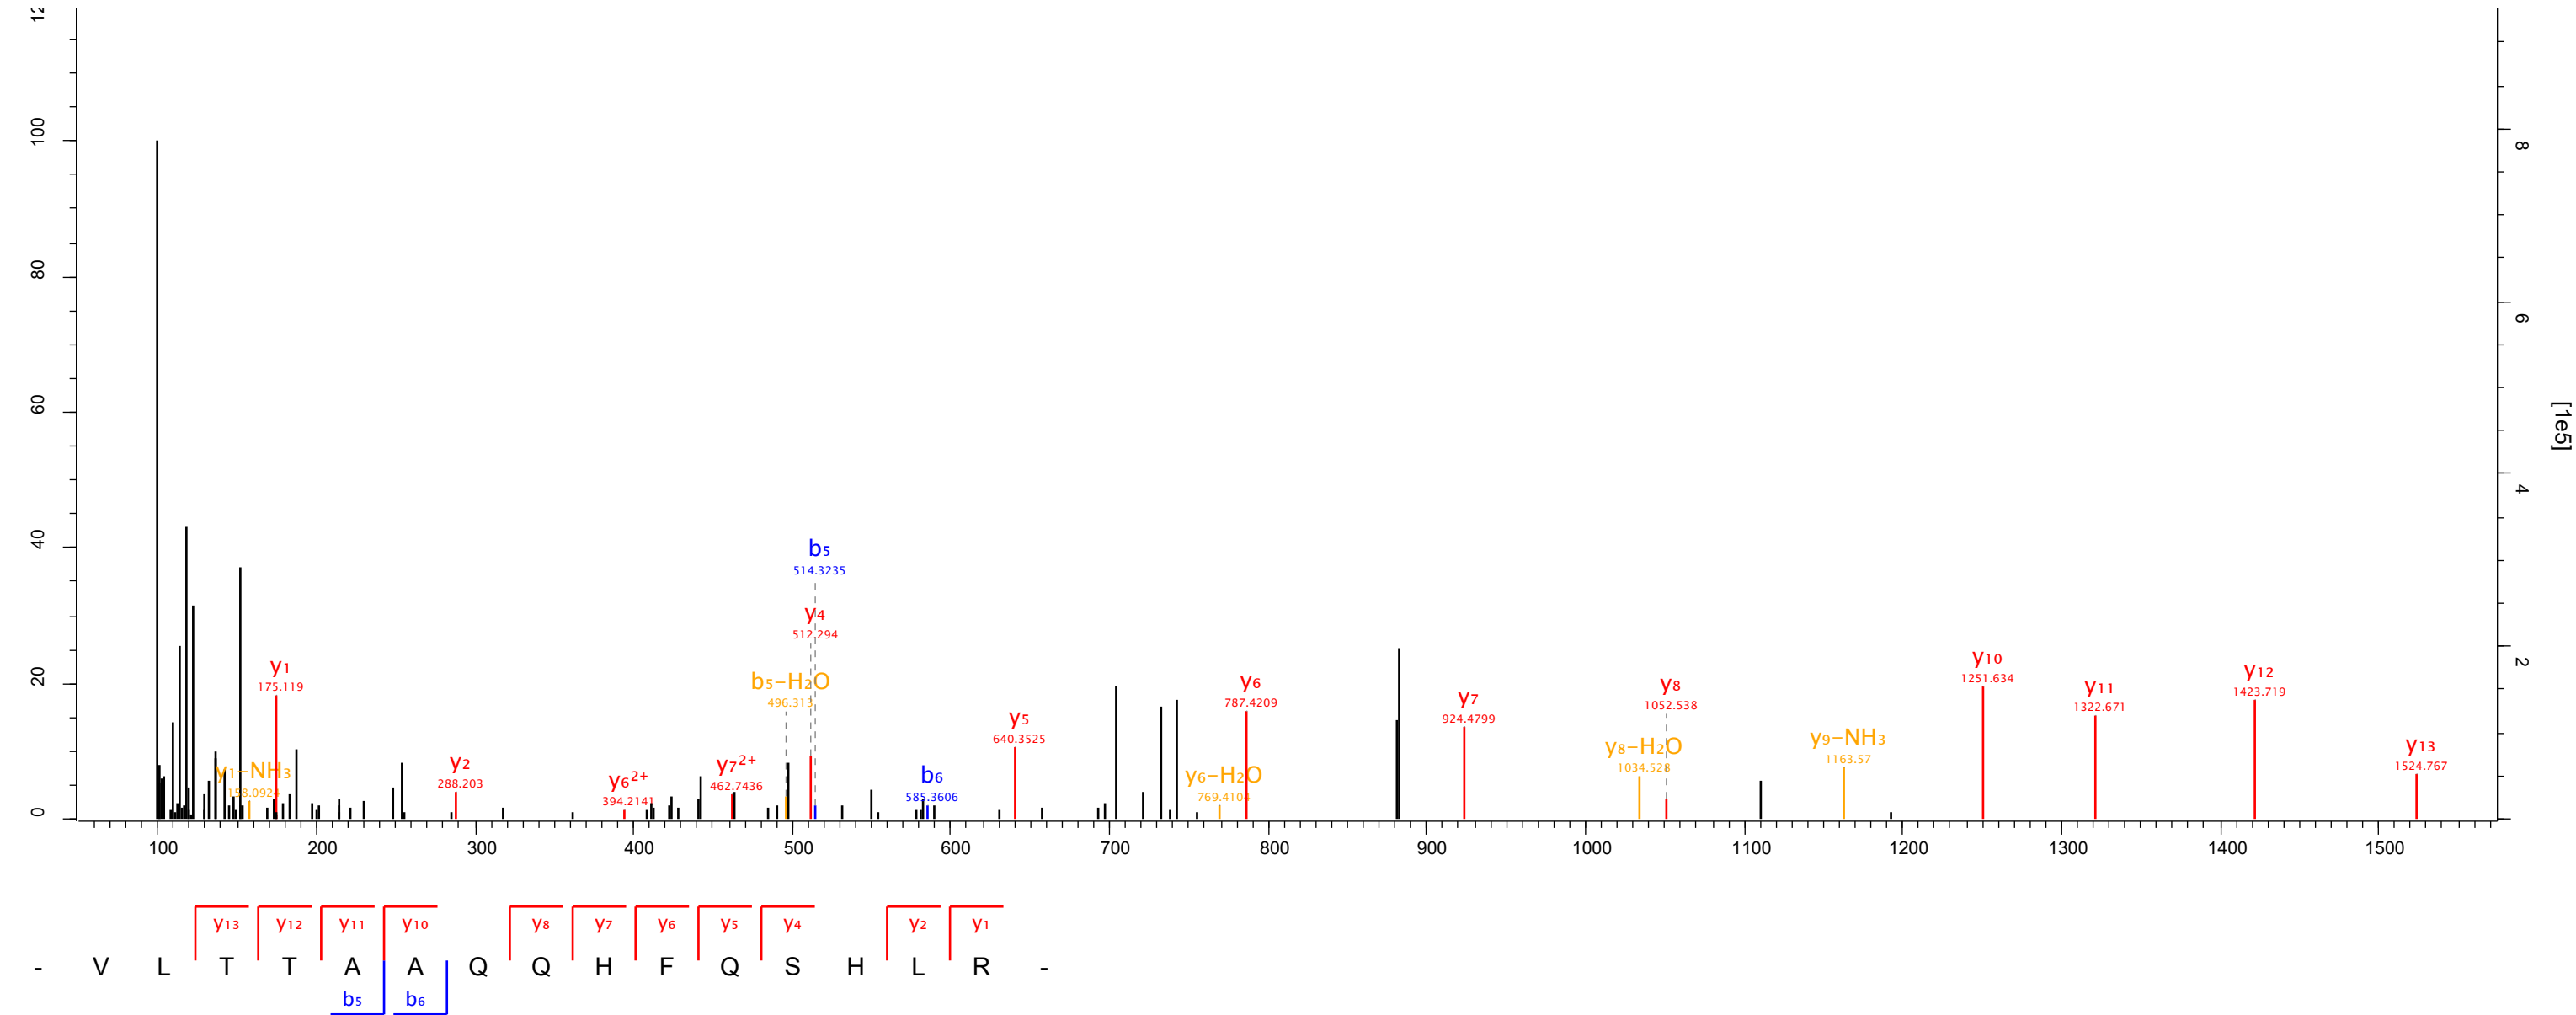

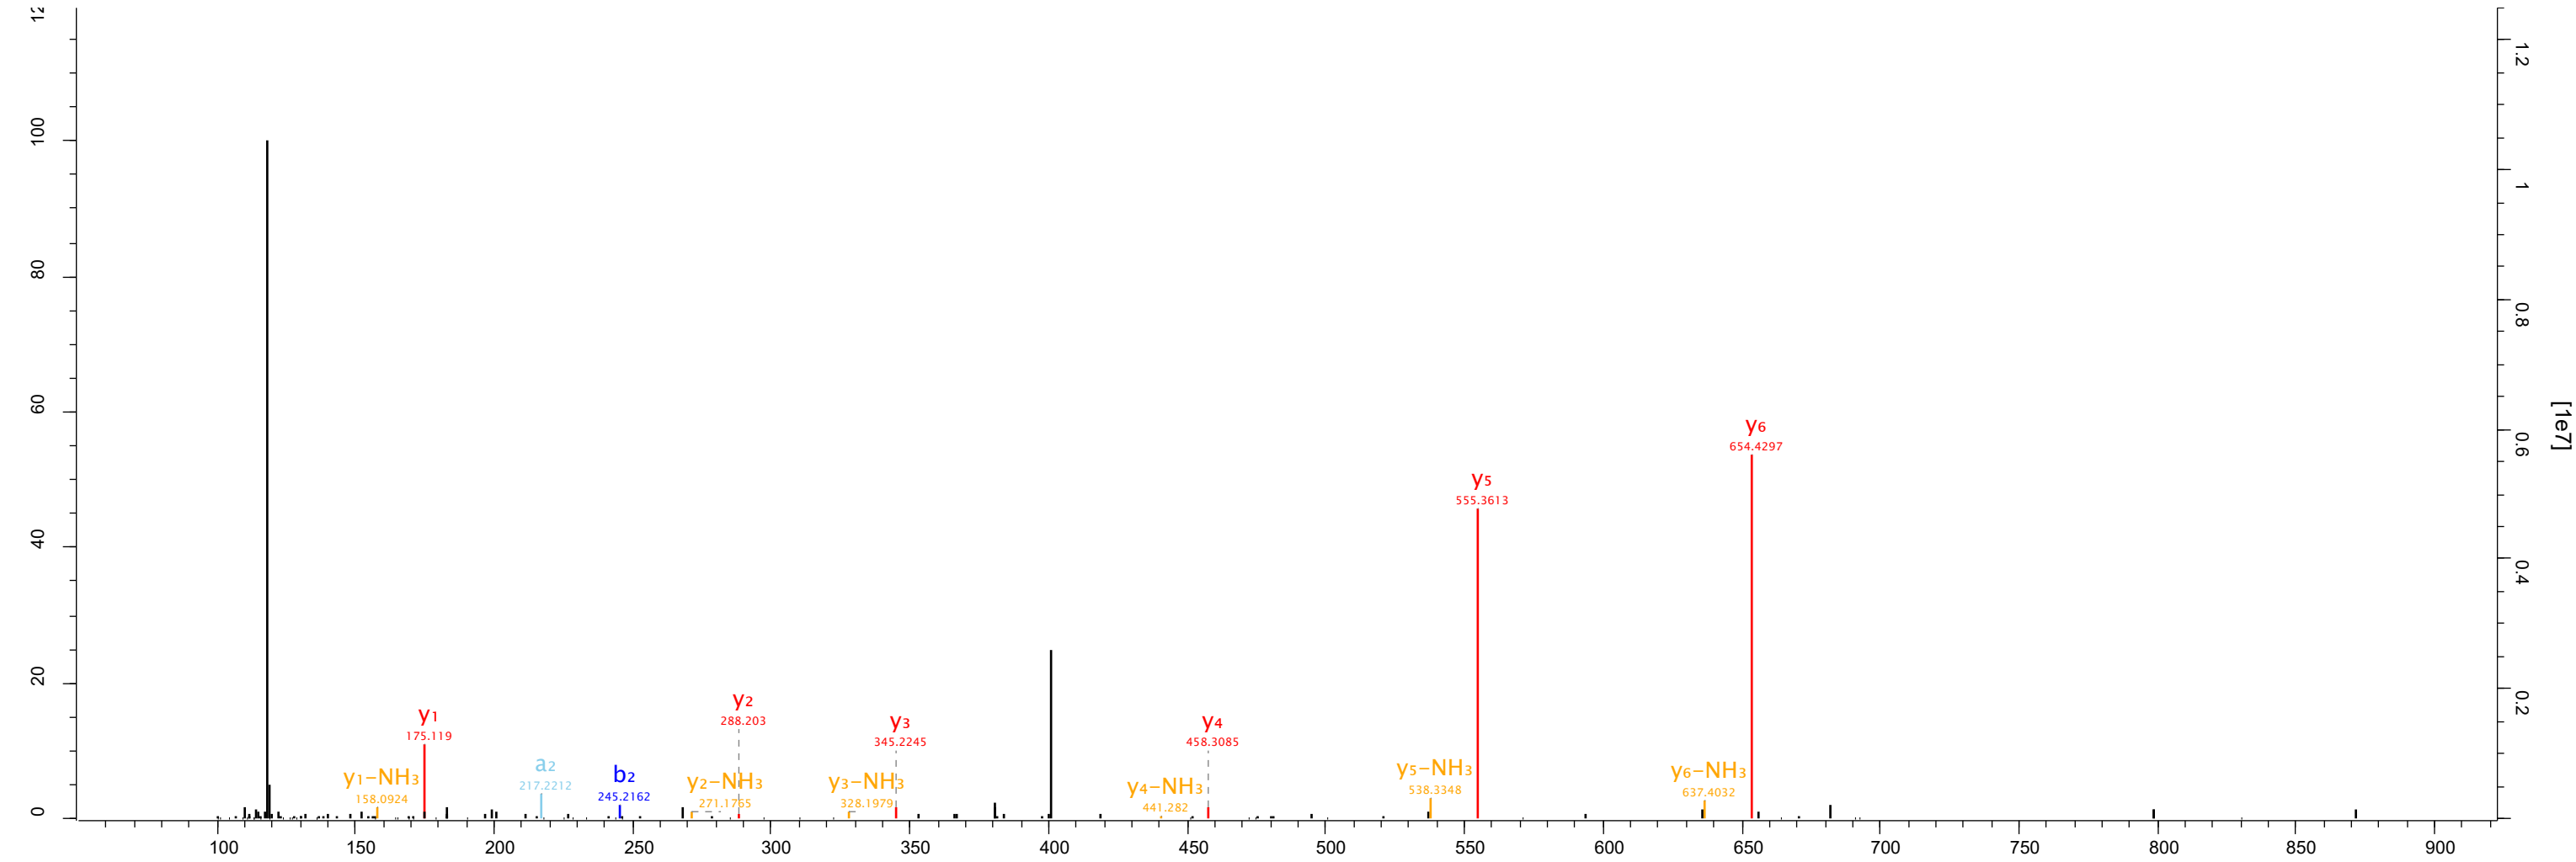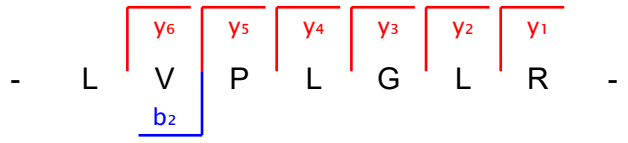

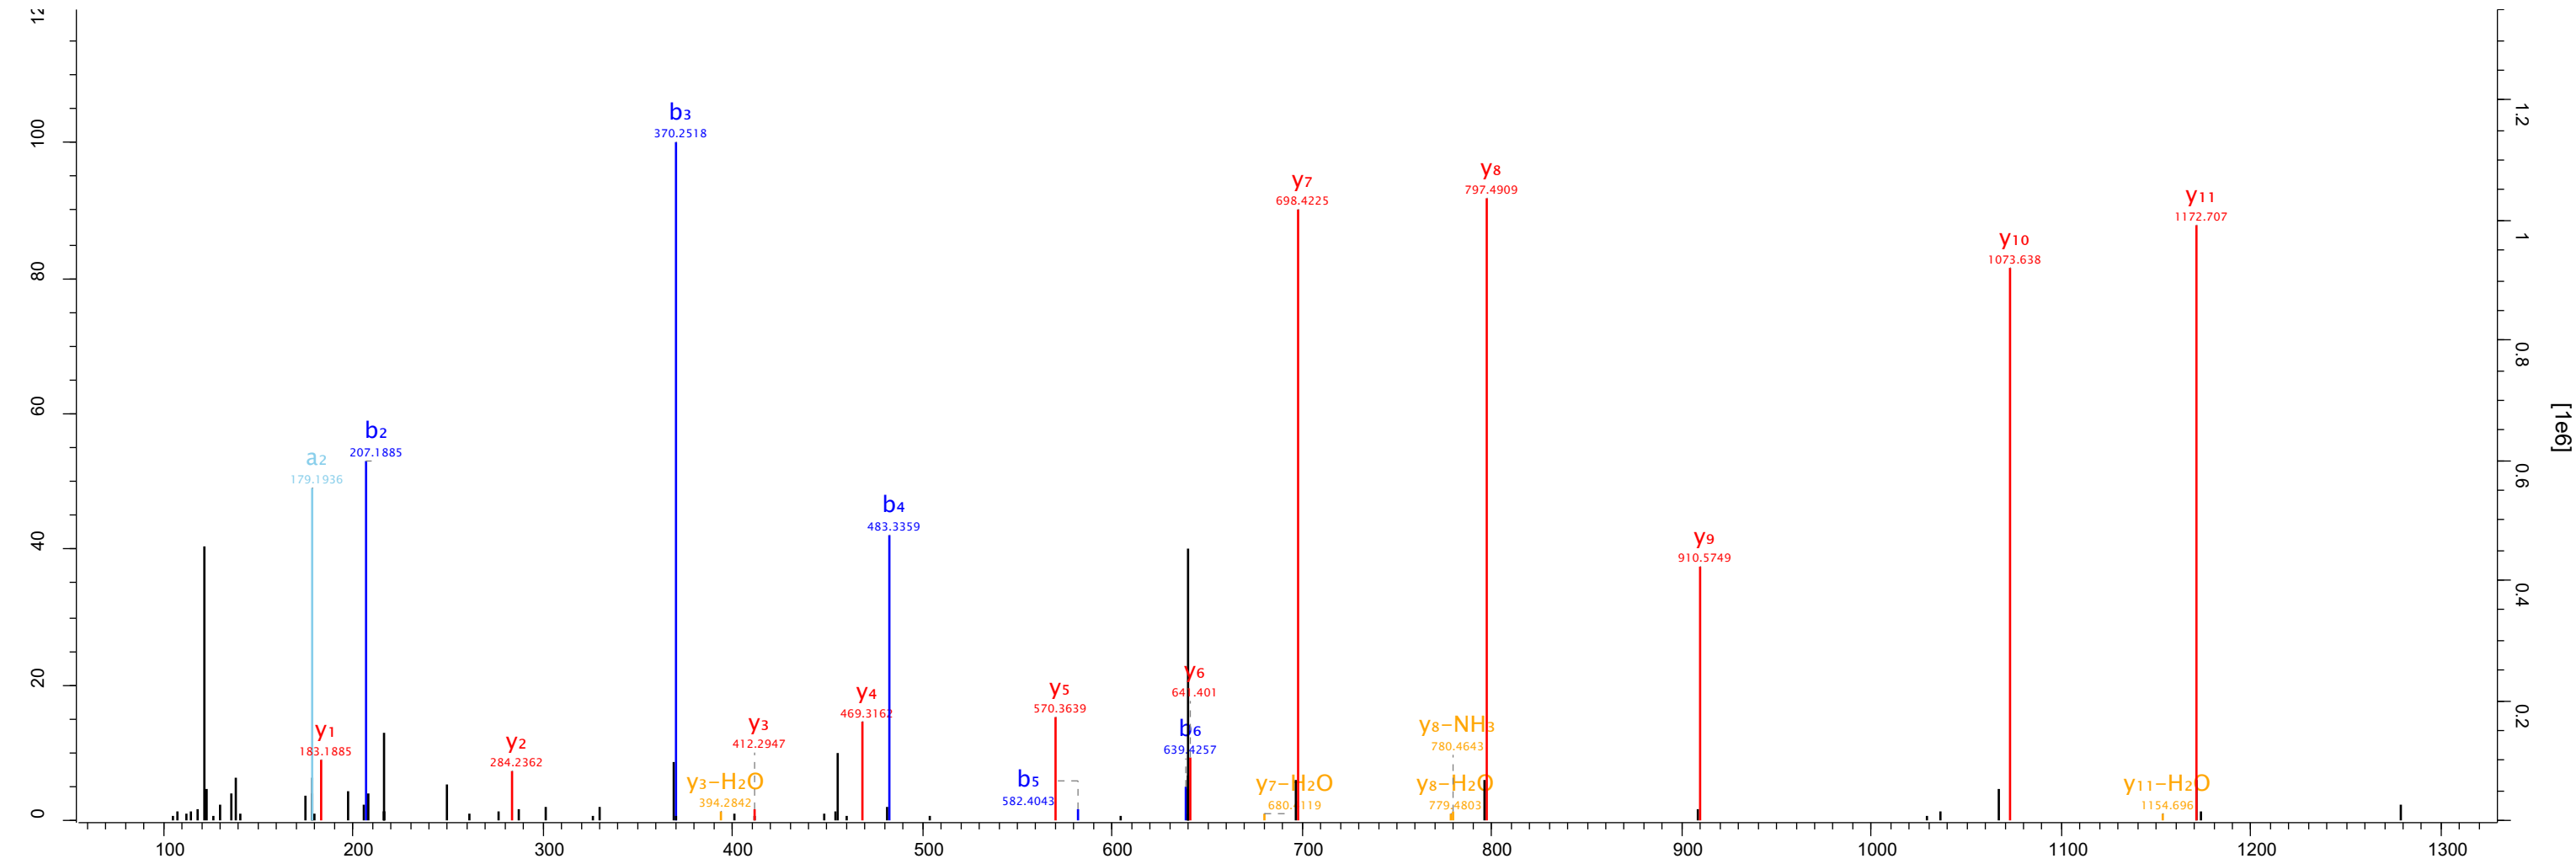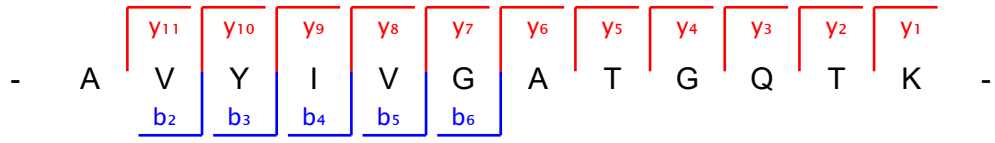

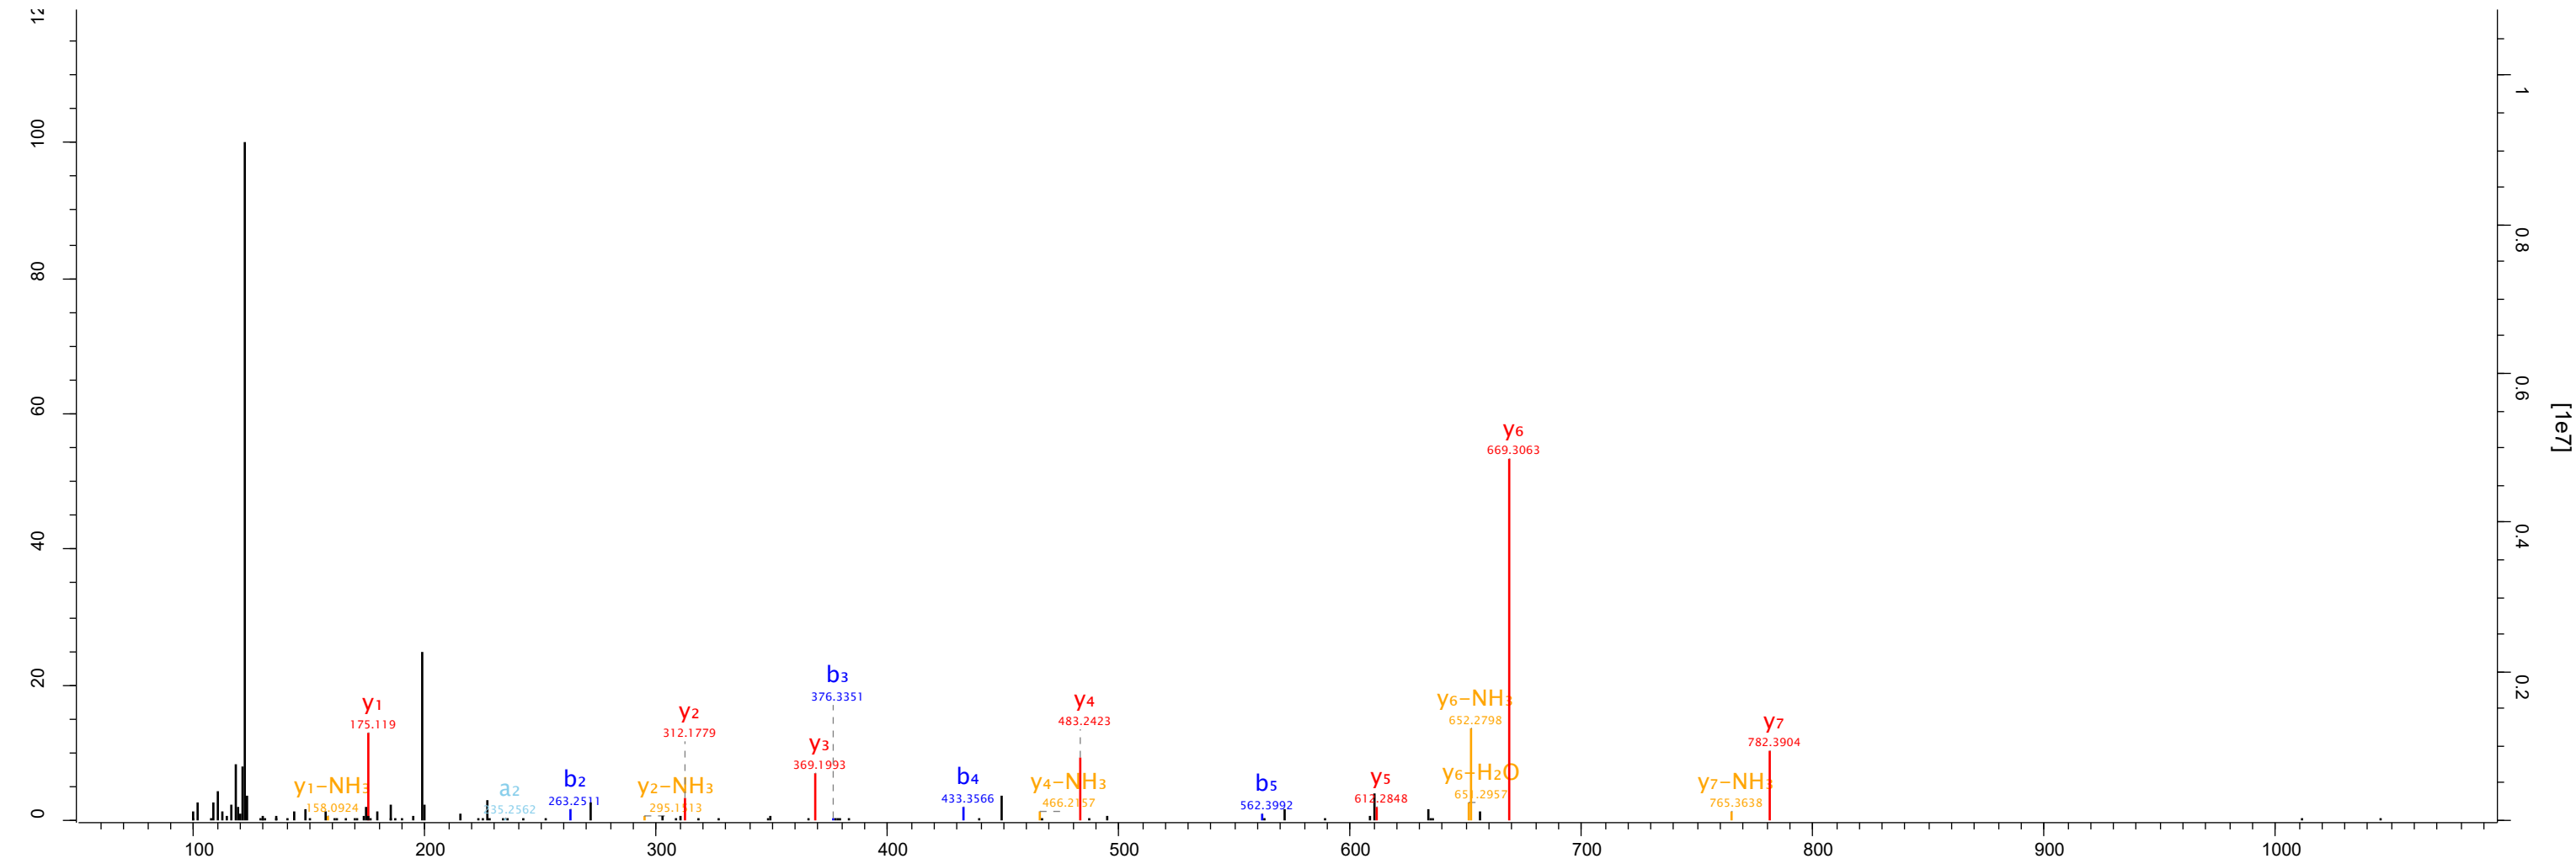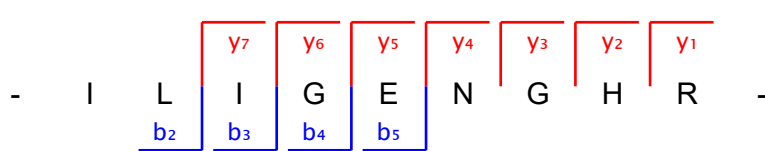

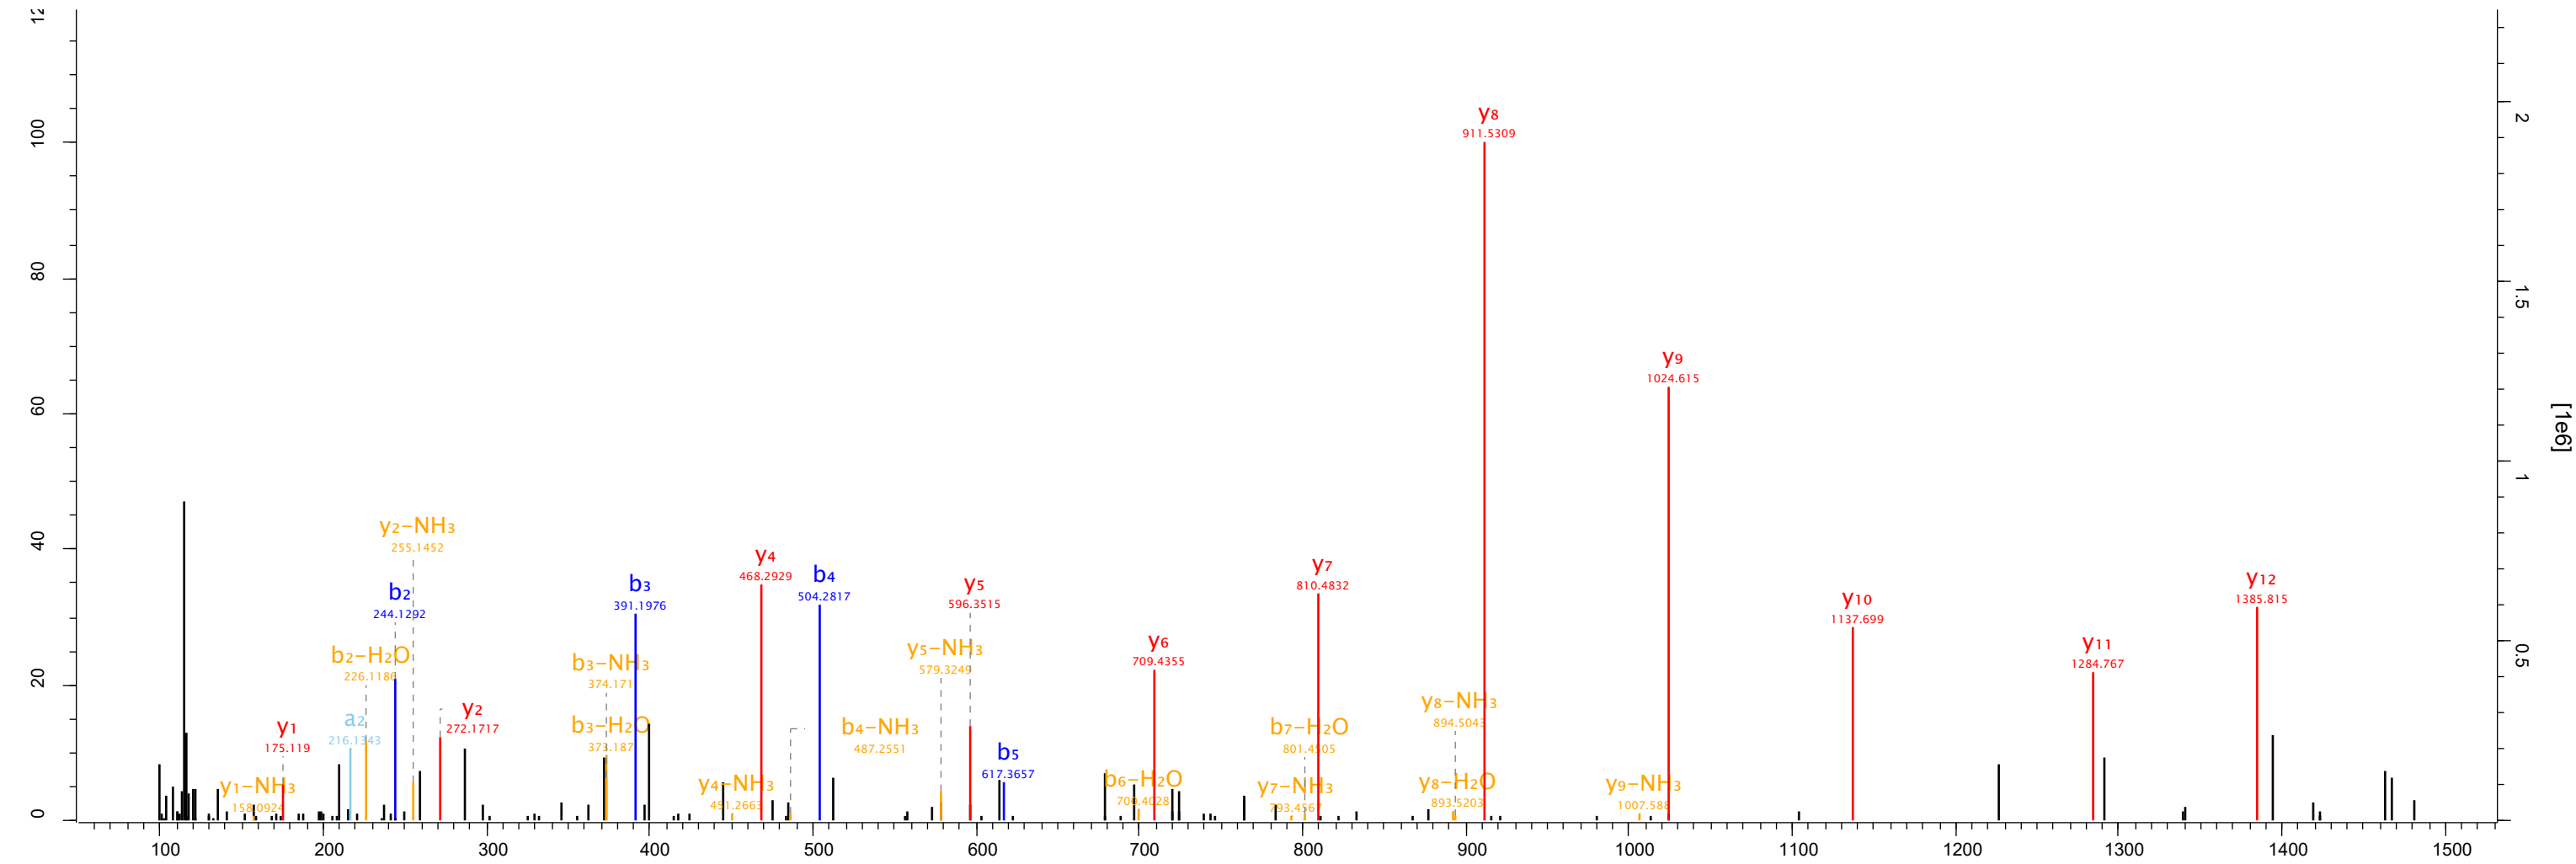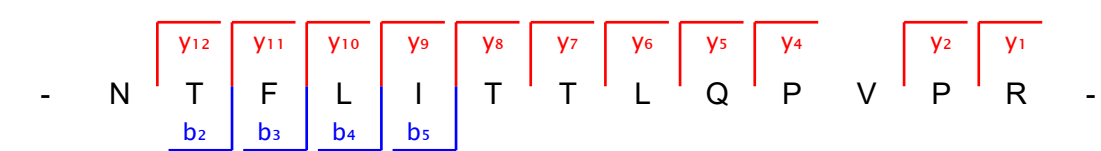

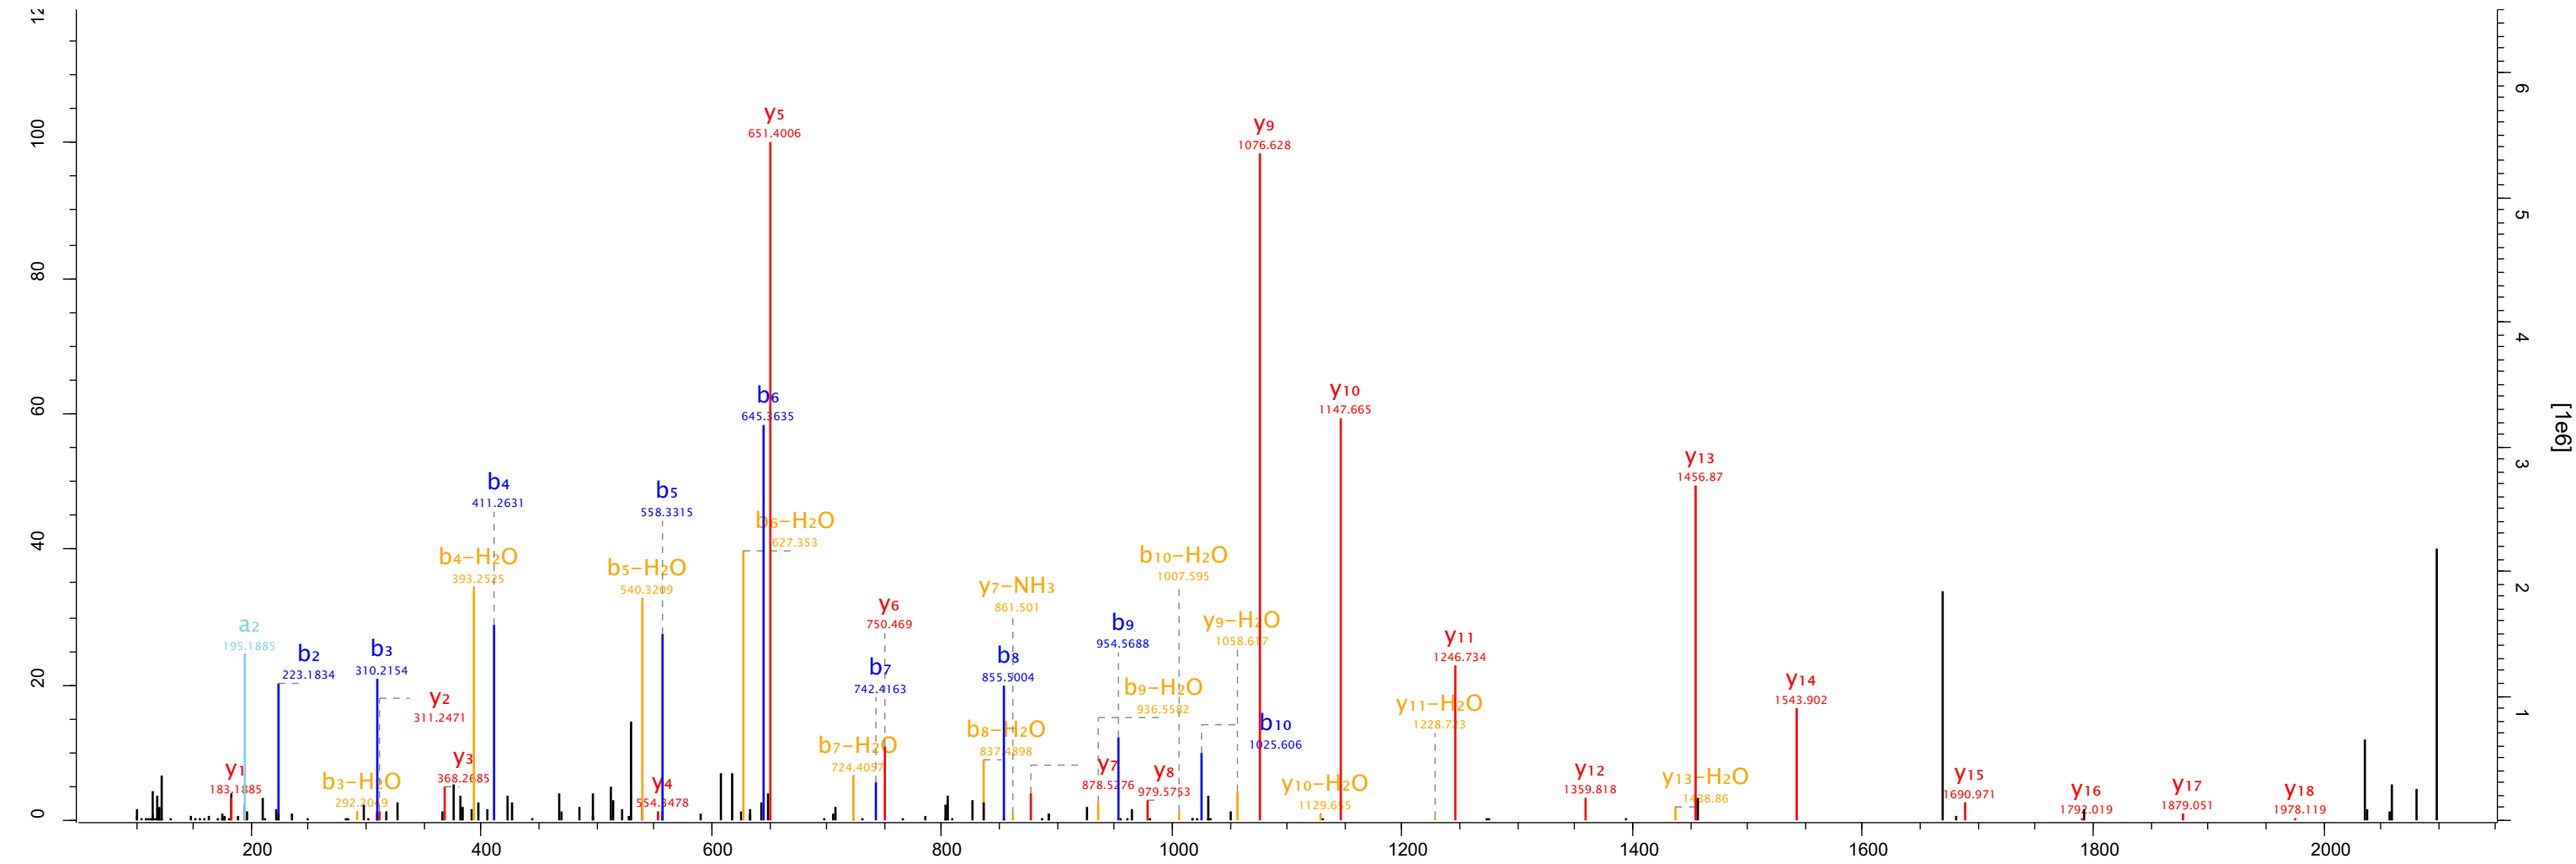

- S V S T F S P I V A P T Q V P W G Q K -

b2 b3 b4 b5 b6 b7 b8 b9 b10



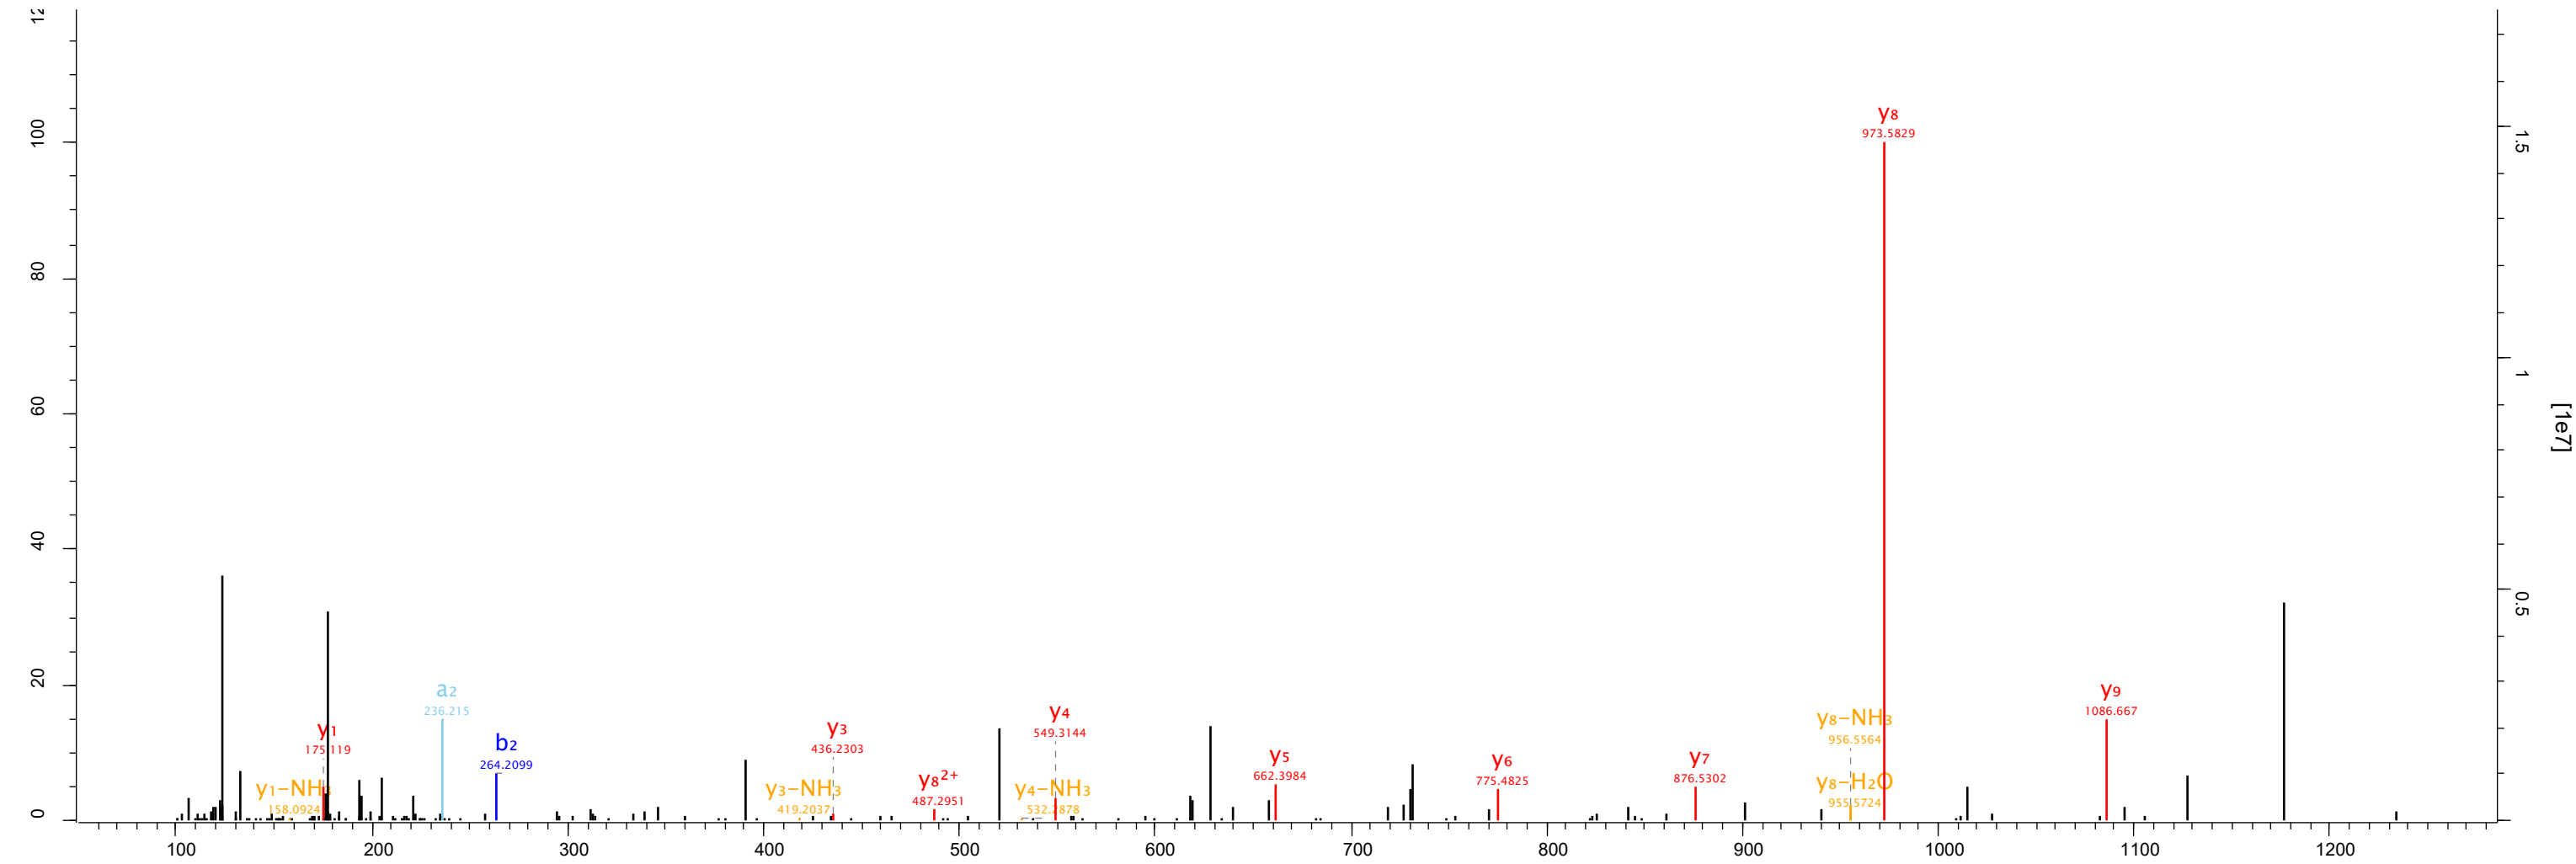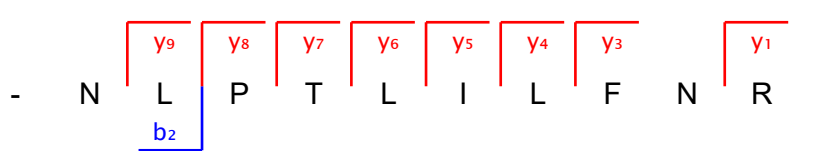

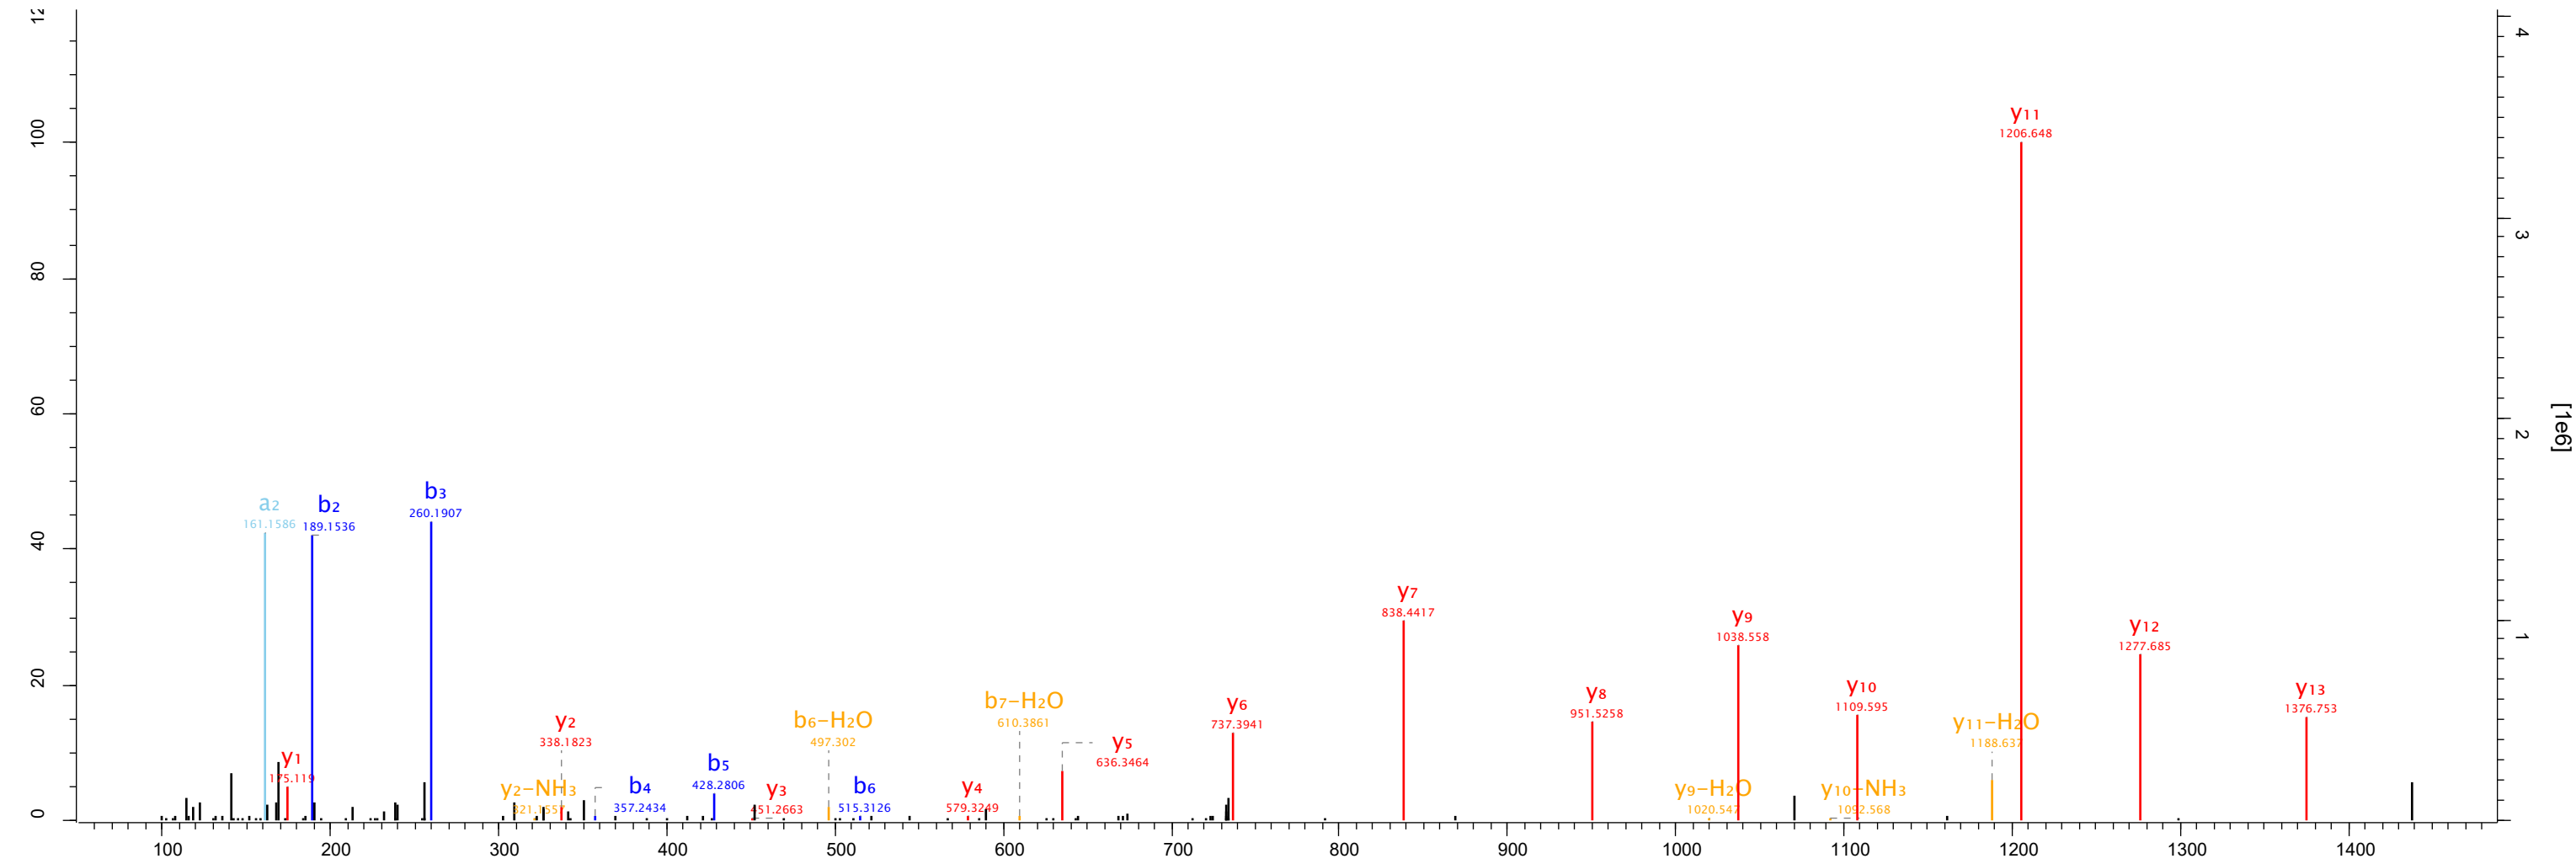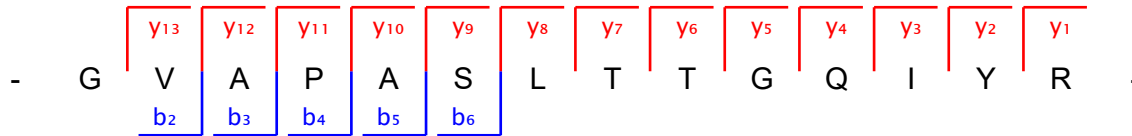

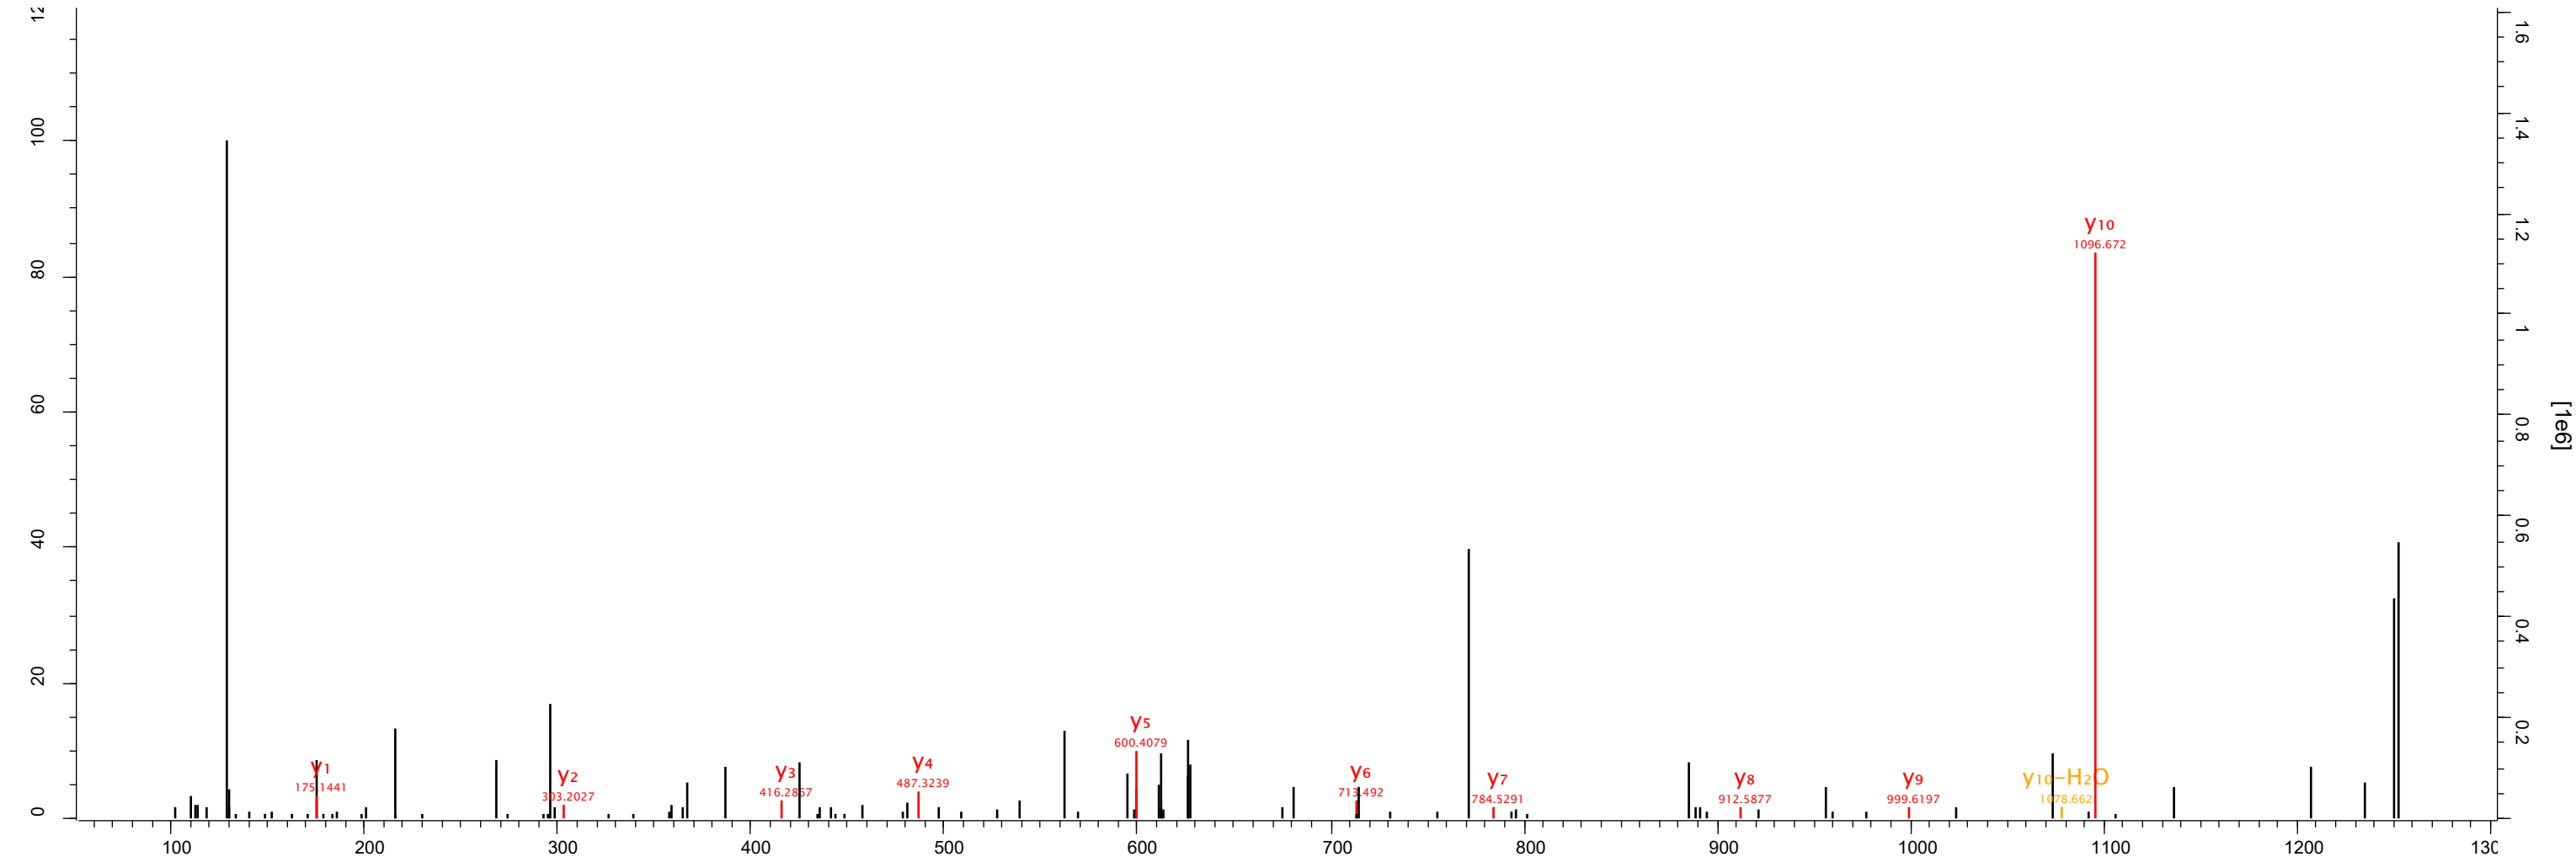

- Q P S Q A L L A L Q K -

Red brackets above the sequence indicate the fragmentation sites for the y-series ions: y10 (between P and S), y9 (between S and Q), y8 (between Q and A), y7 (between A and L), y6 (between L and L), y5 (between L and A), y4 (between A and L), y3 (between L and Q), y2 (between Q and K), and y1 (between K and -).

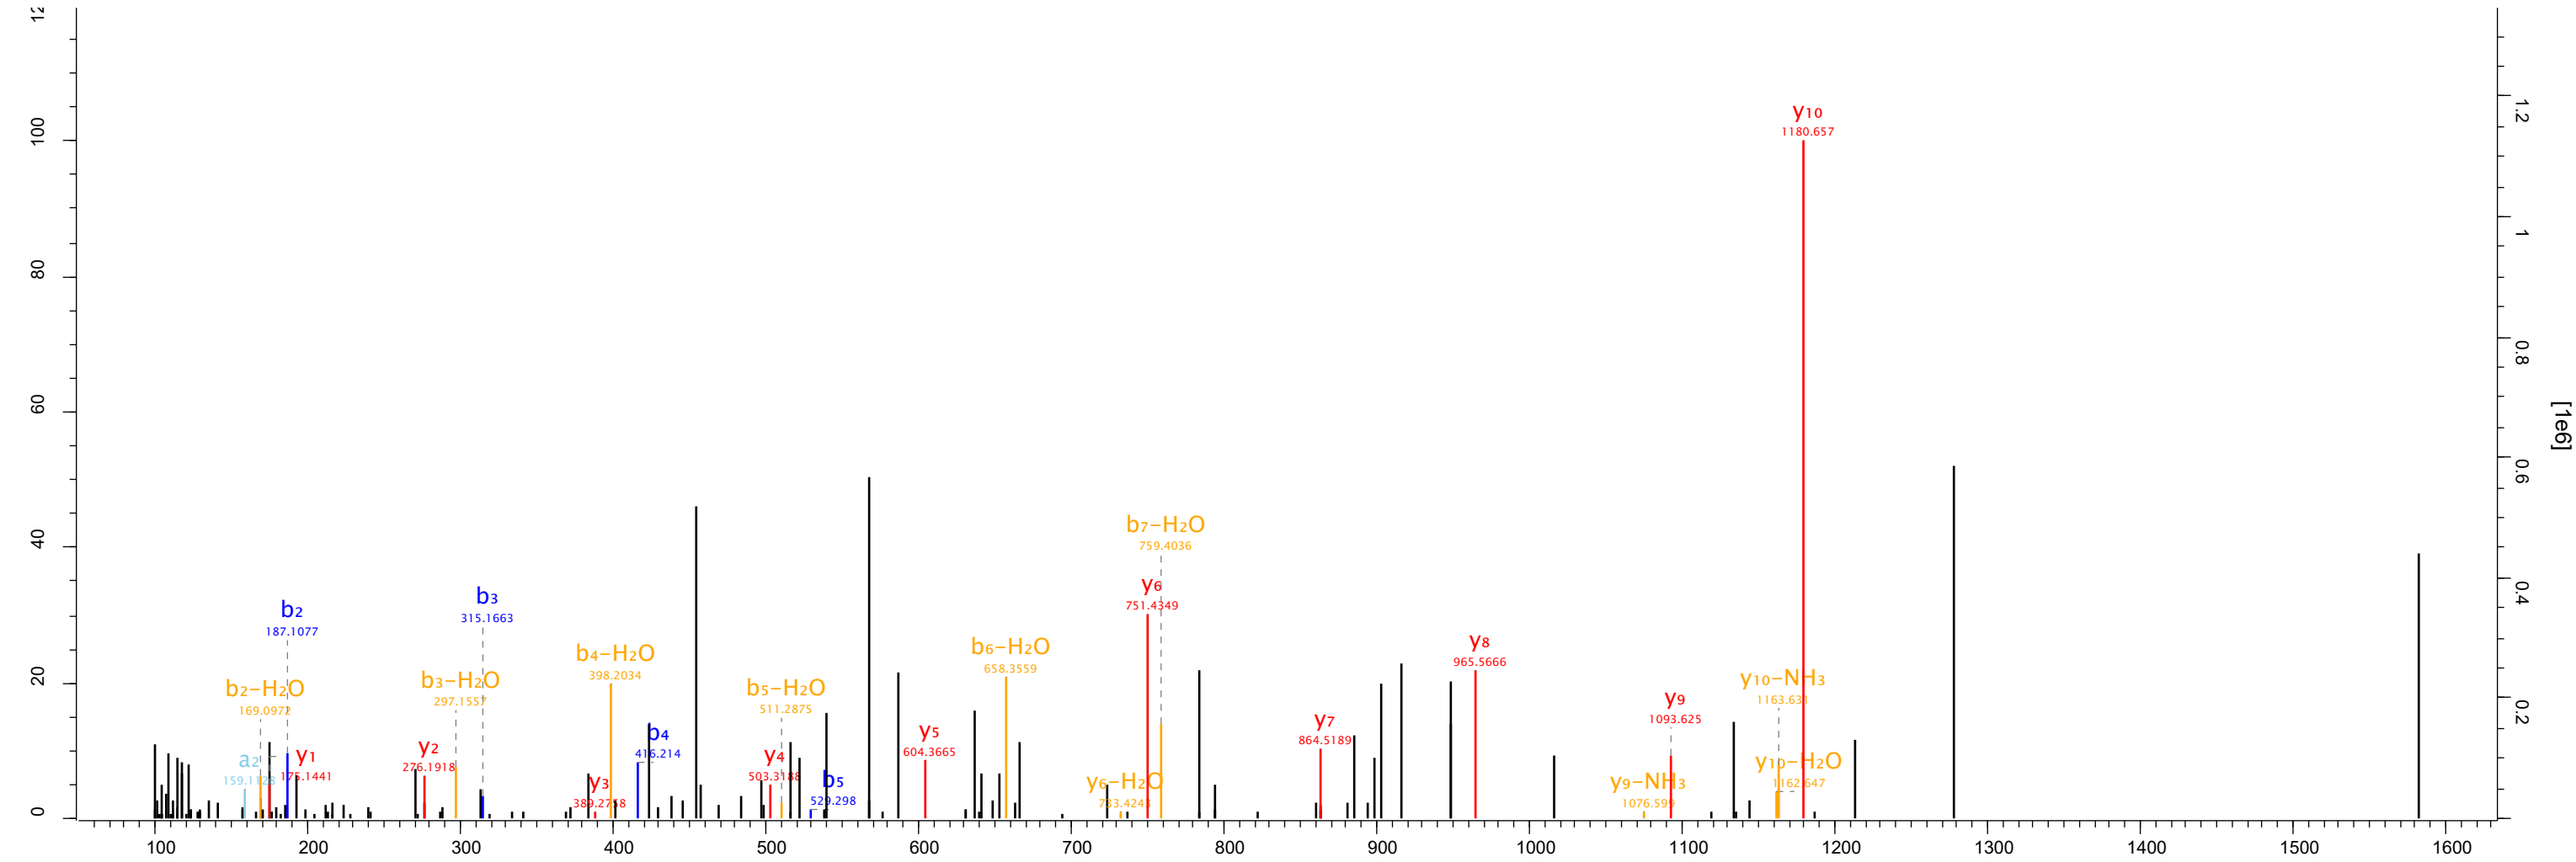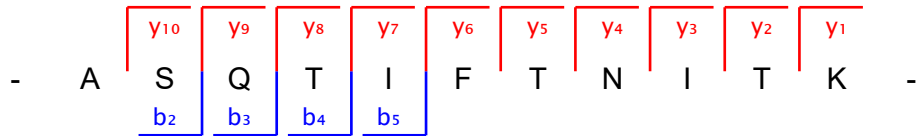

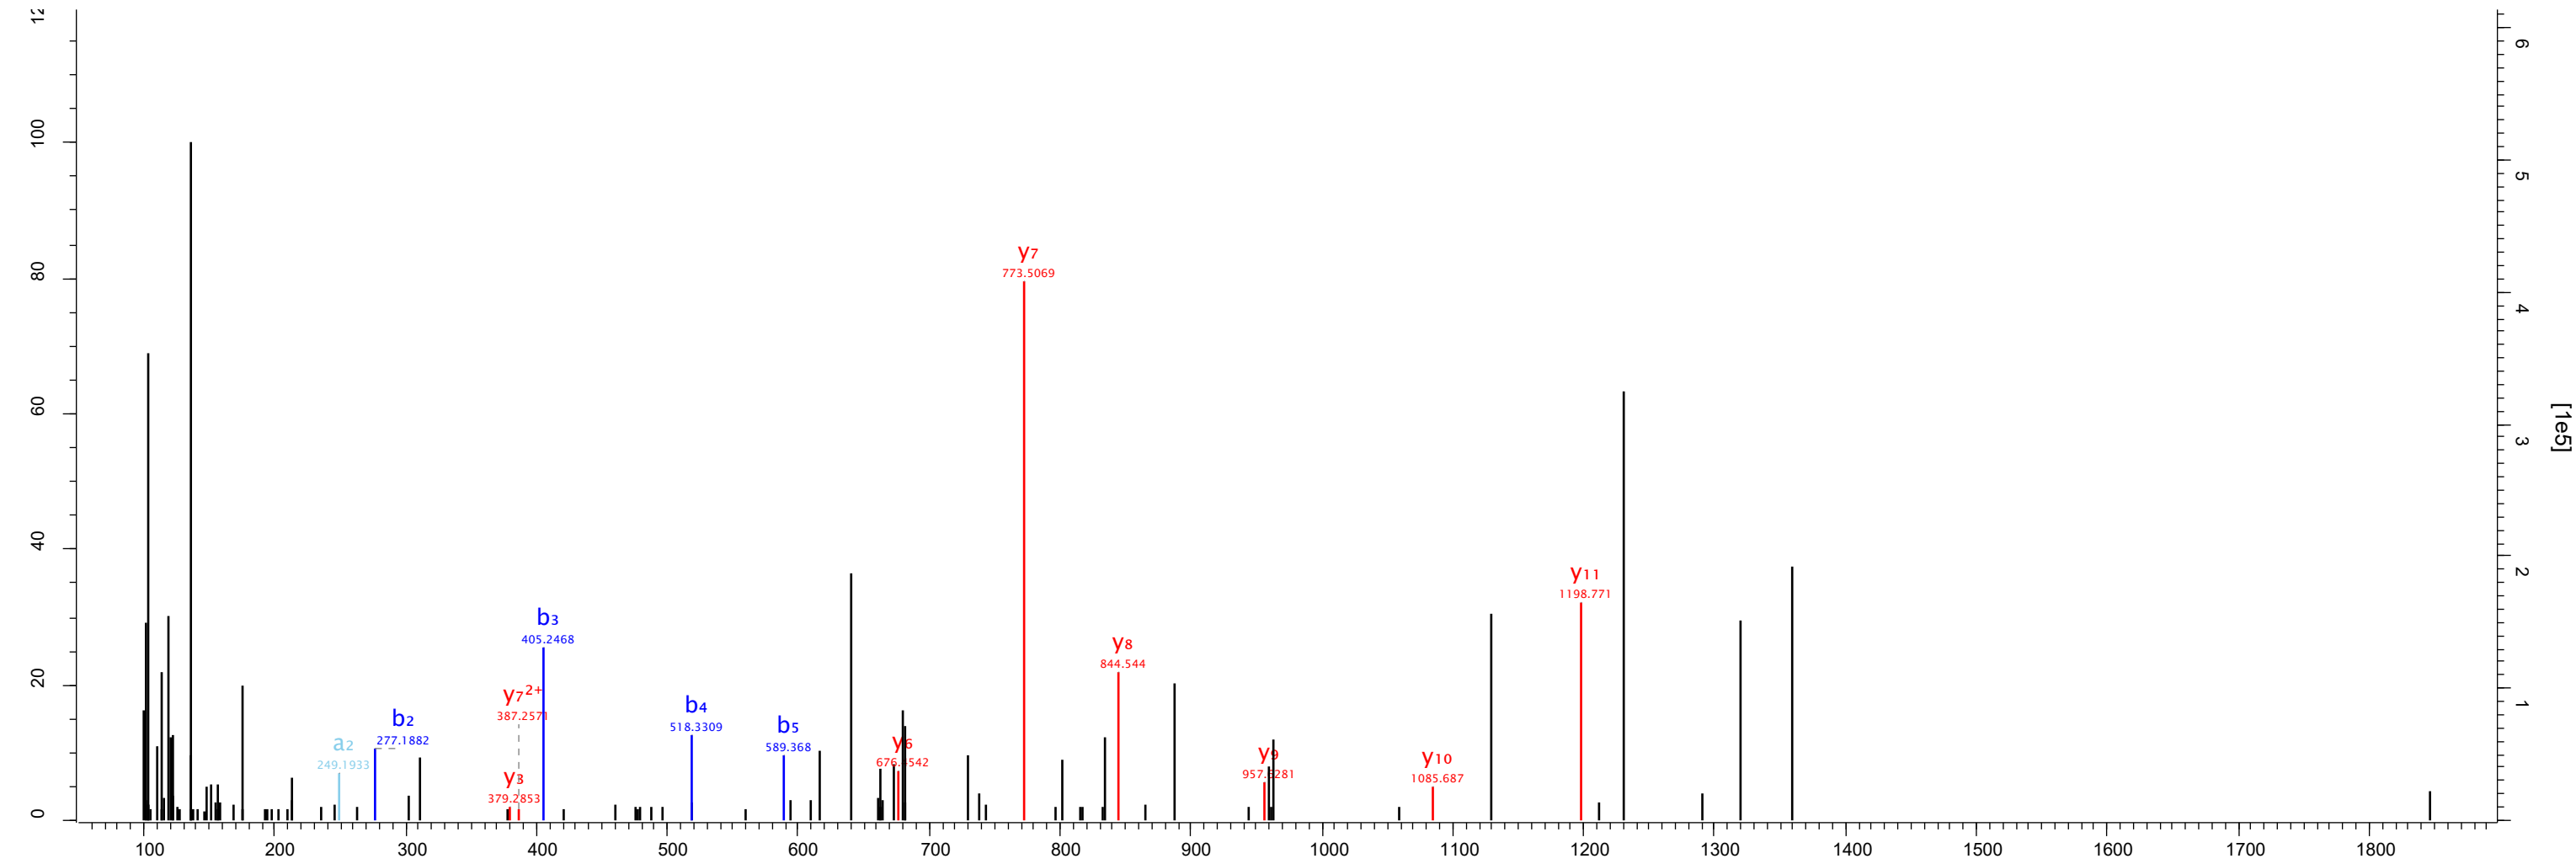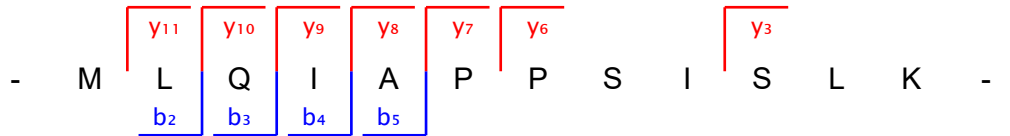

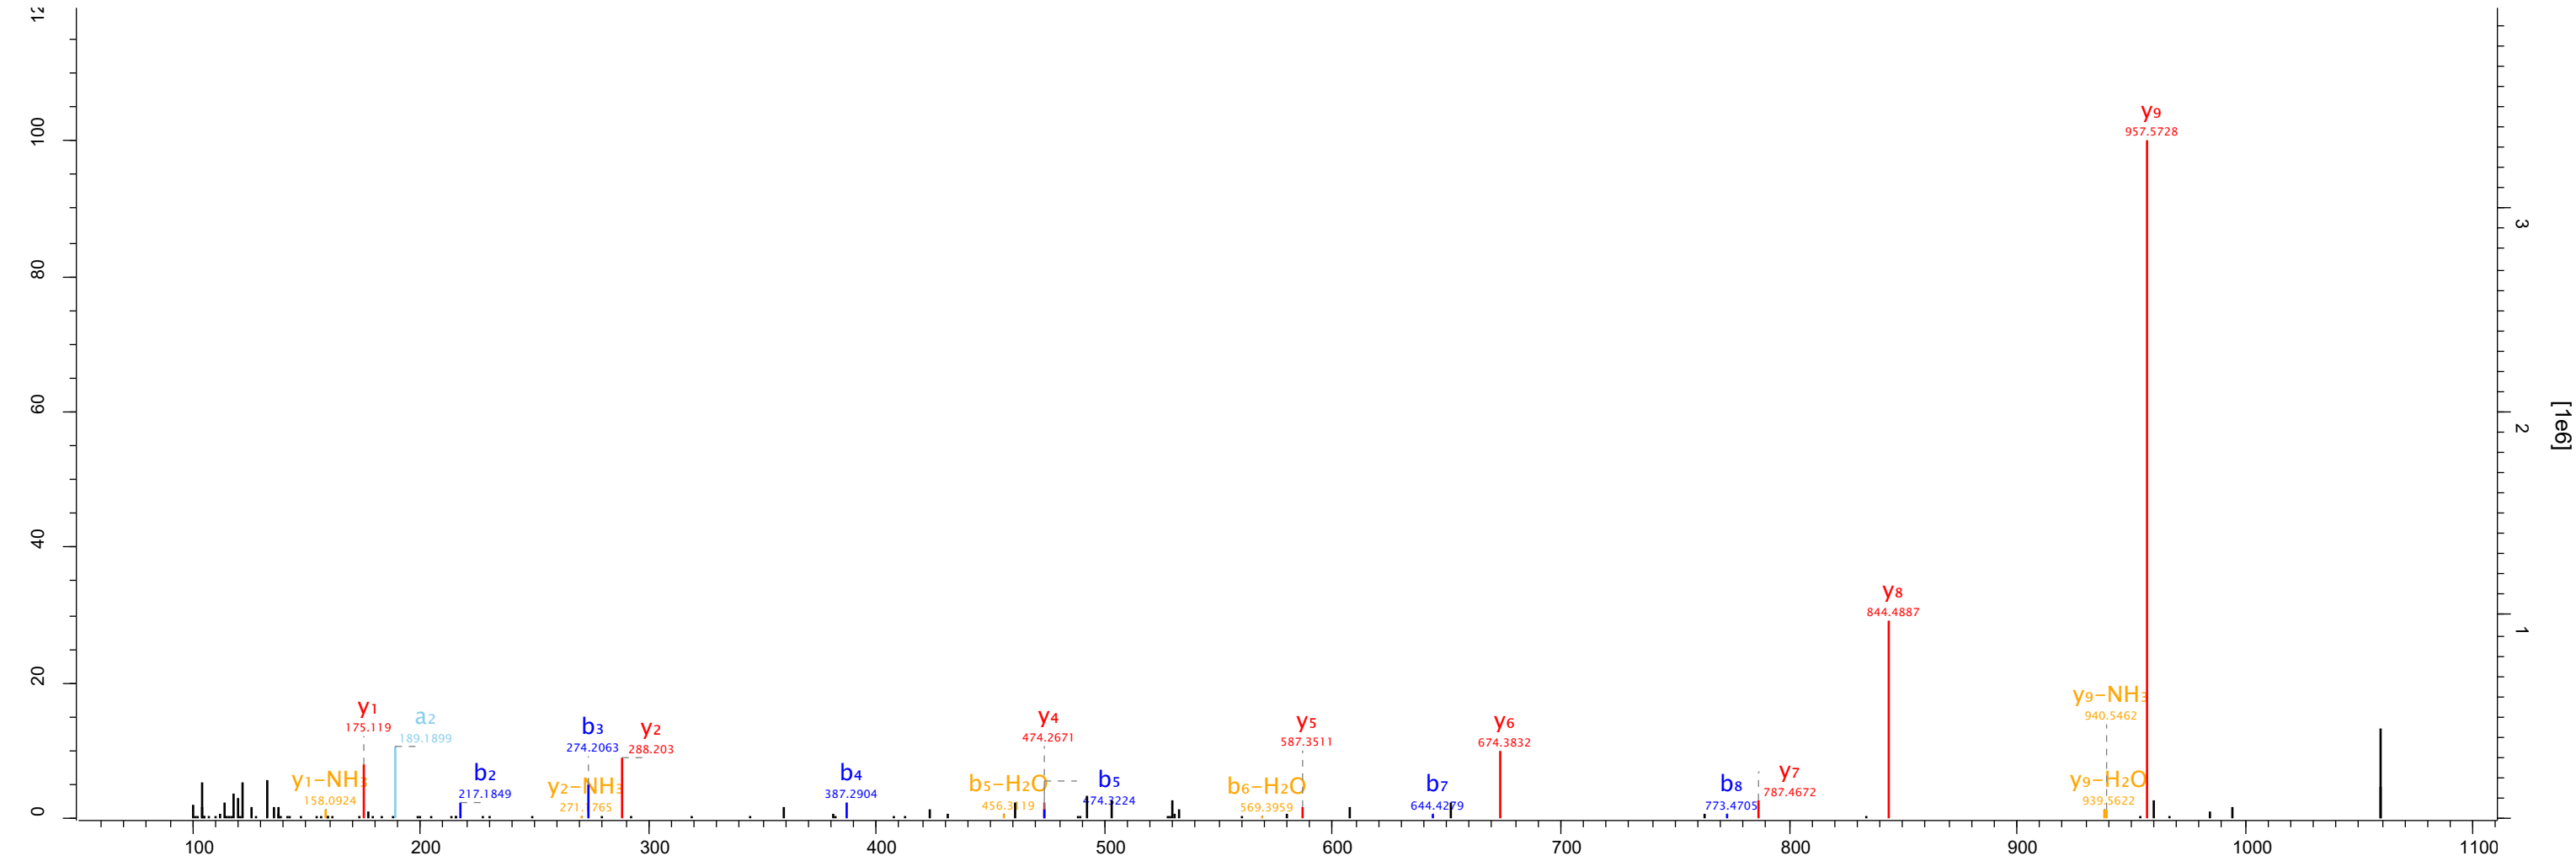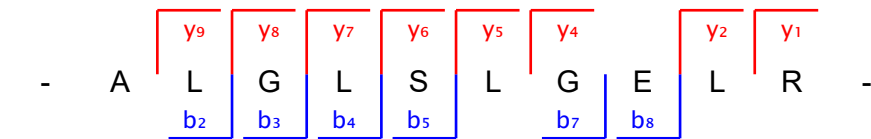

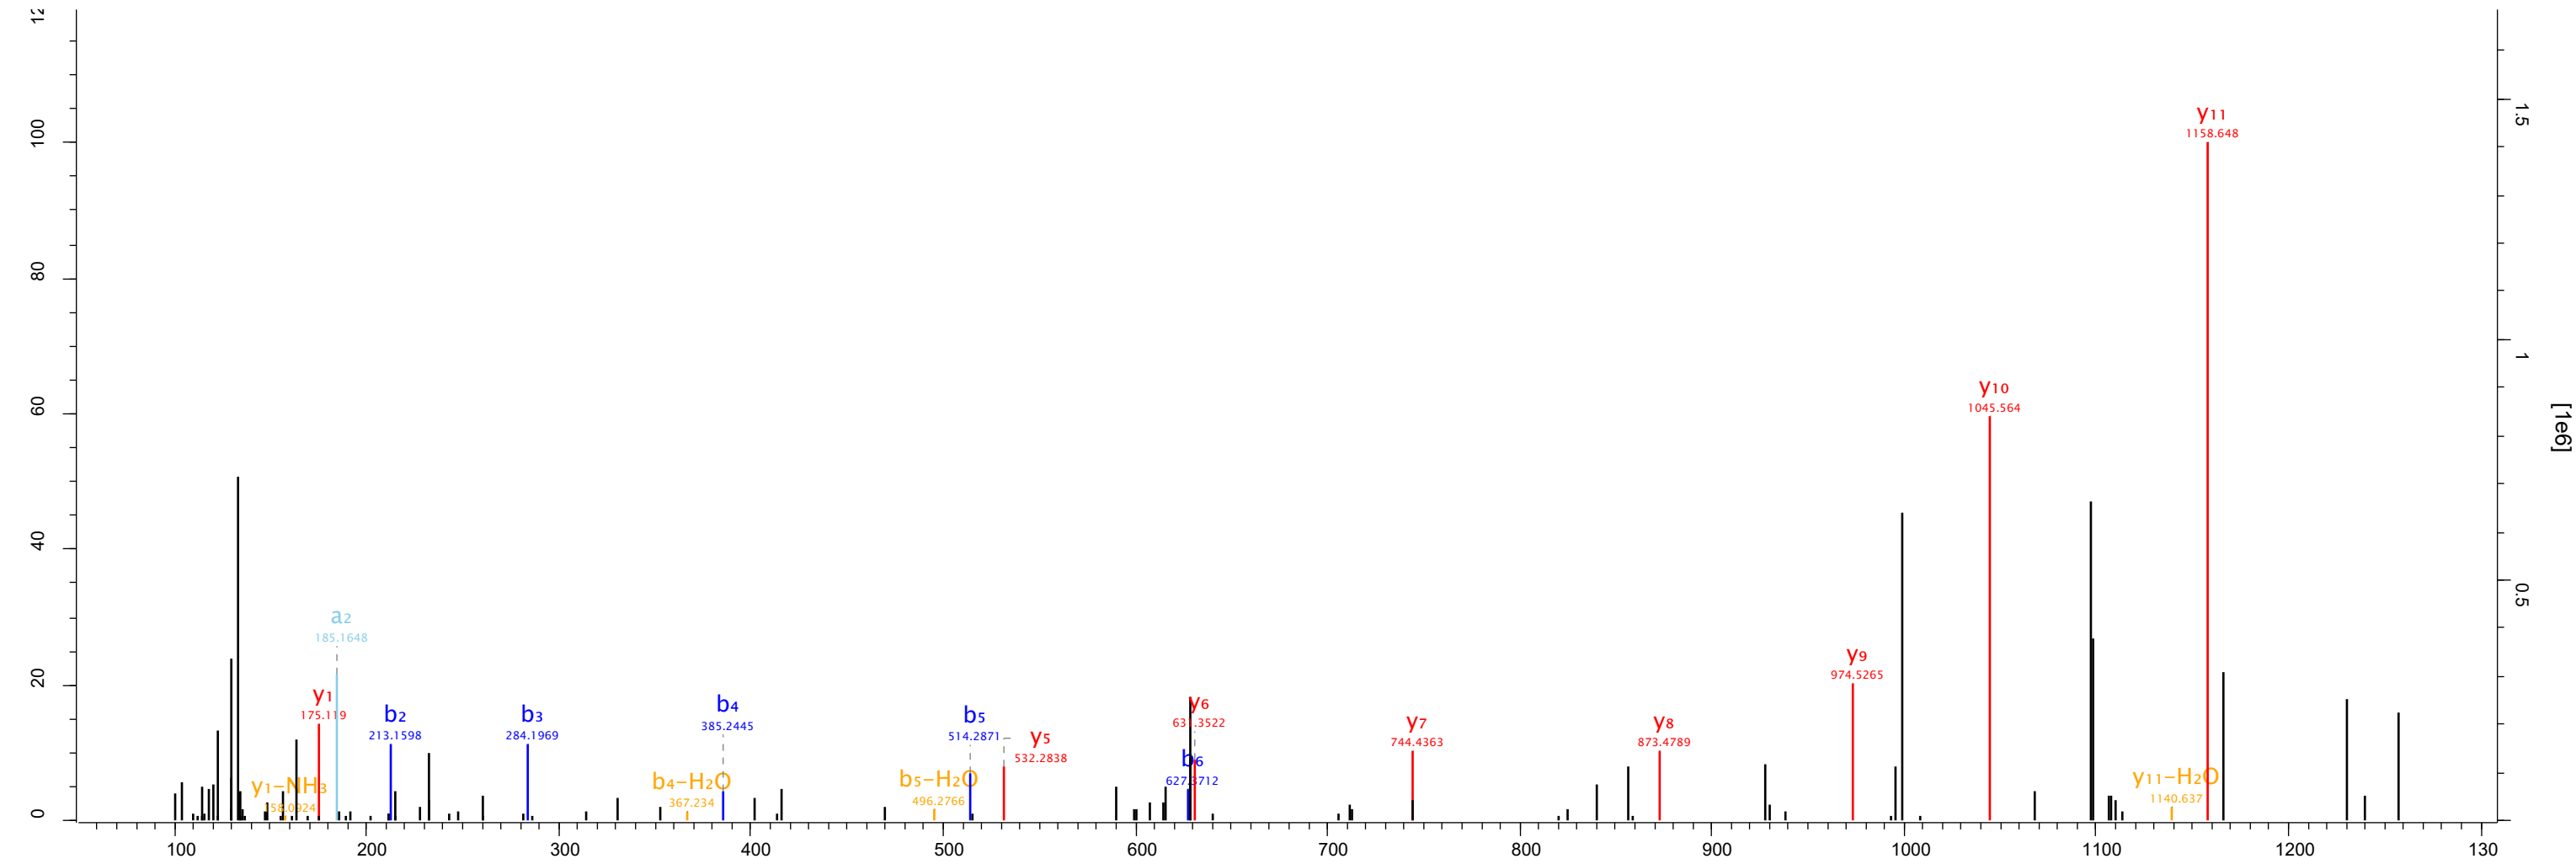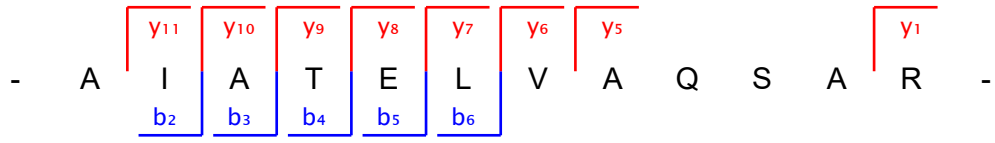

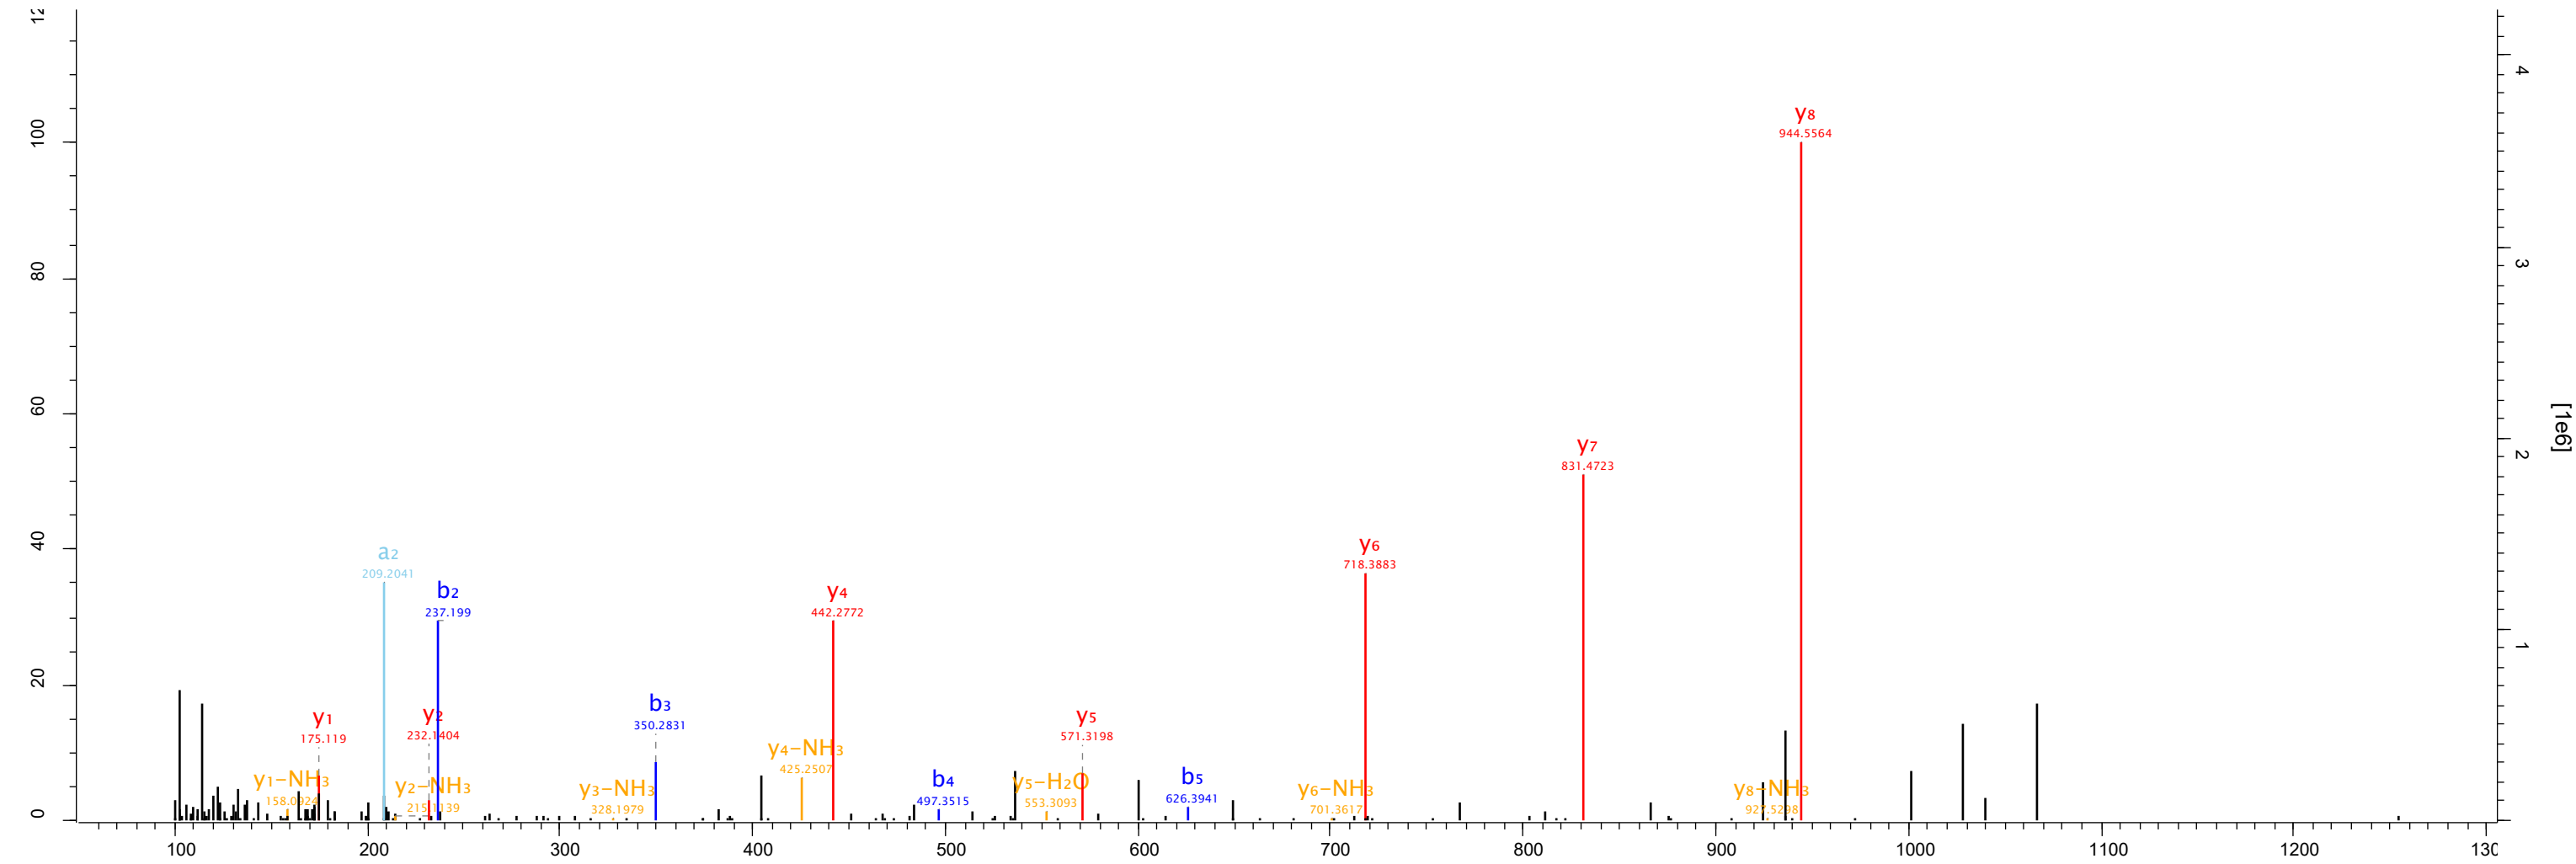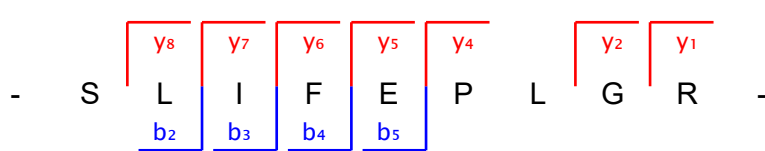



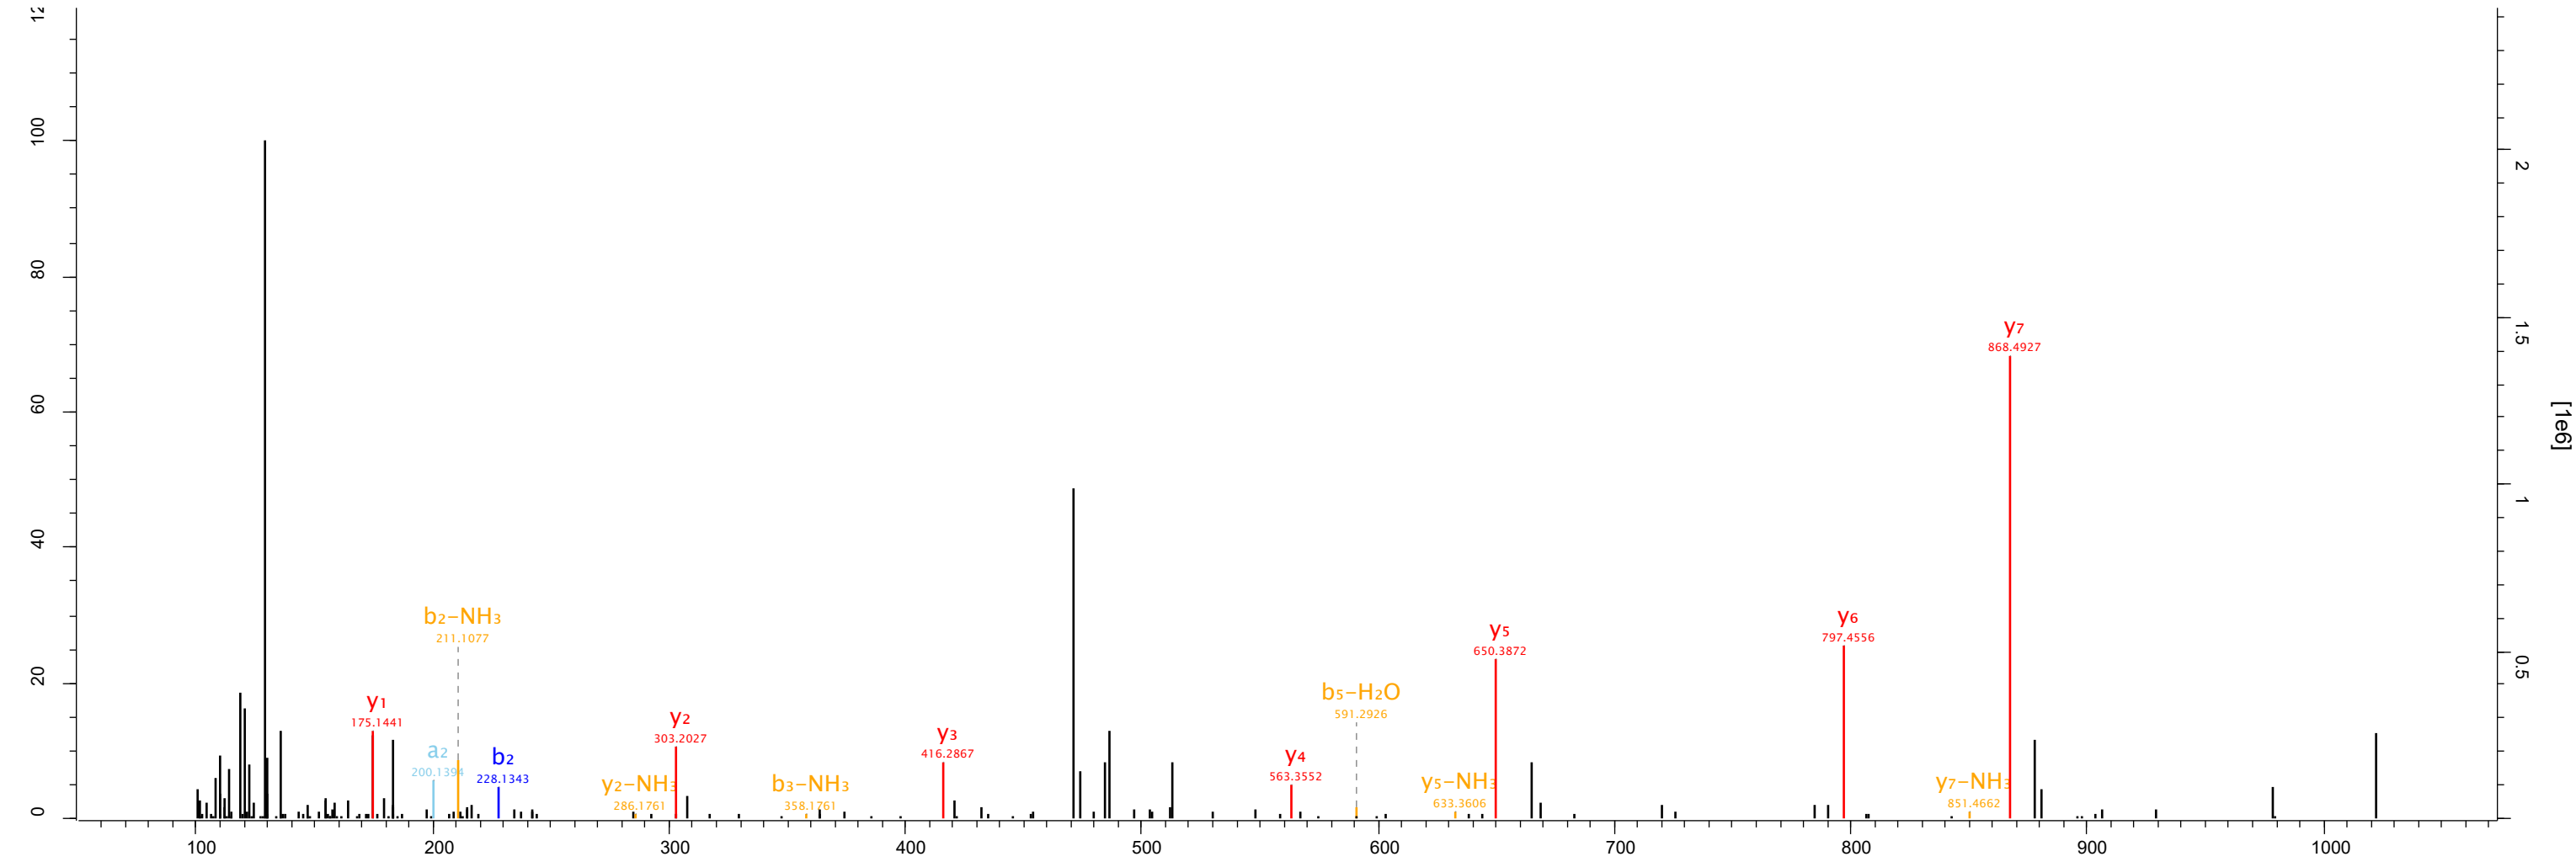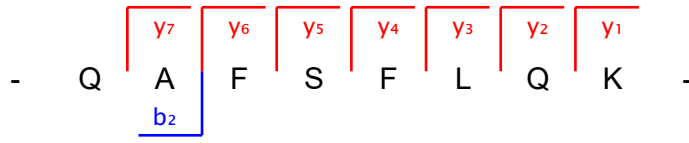

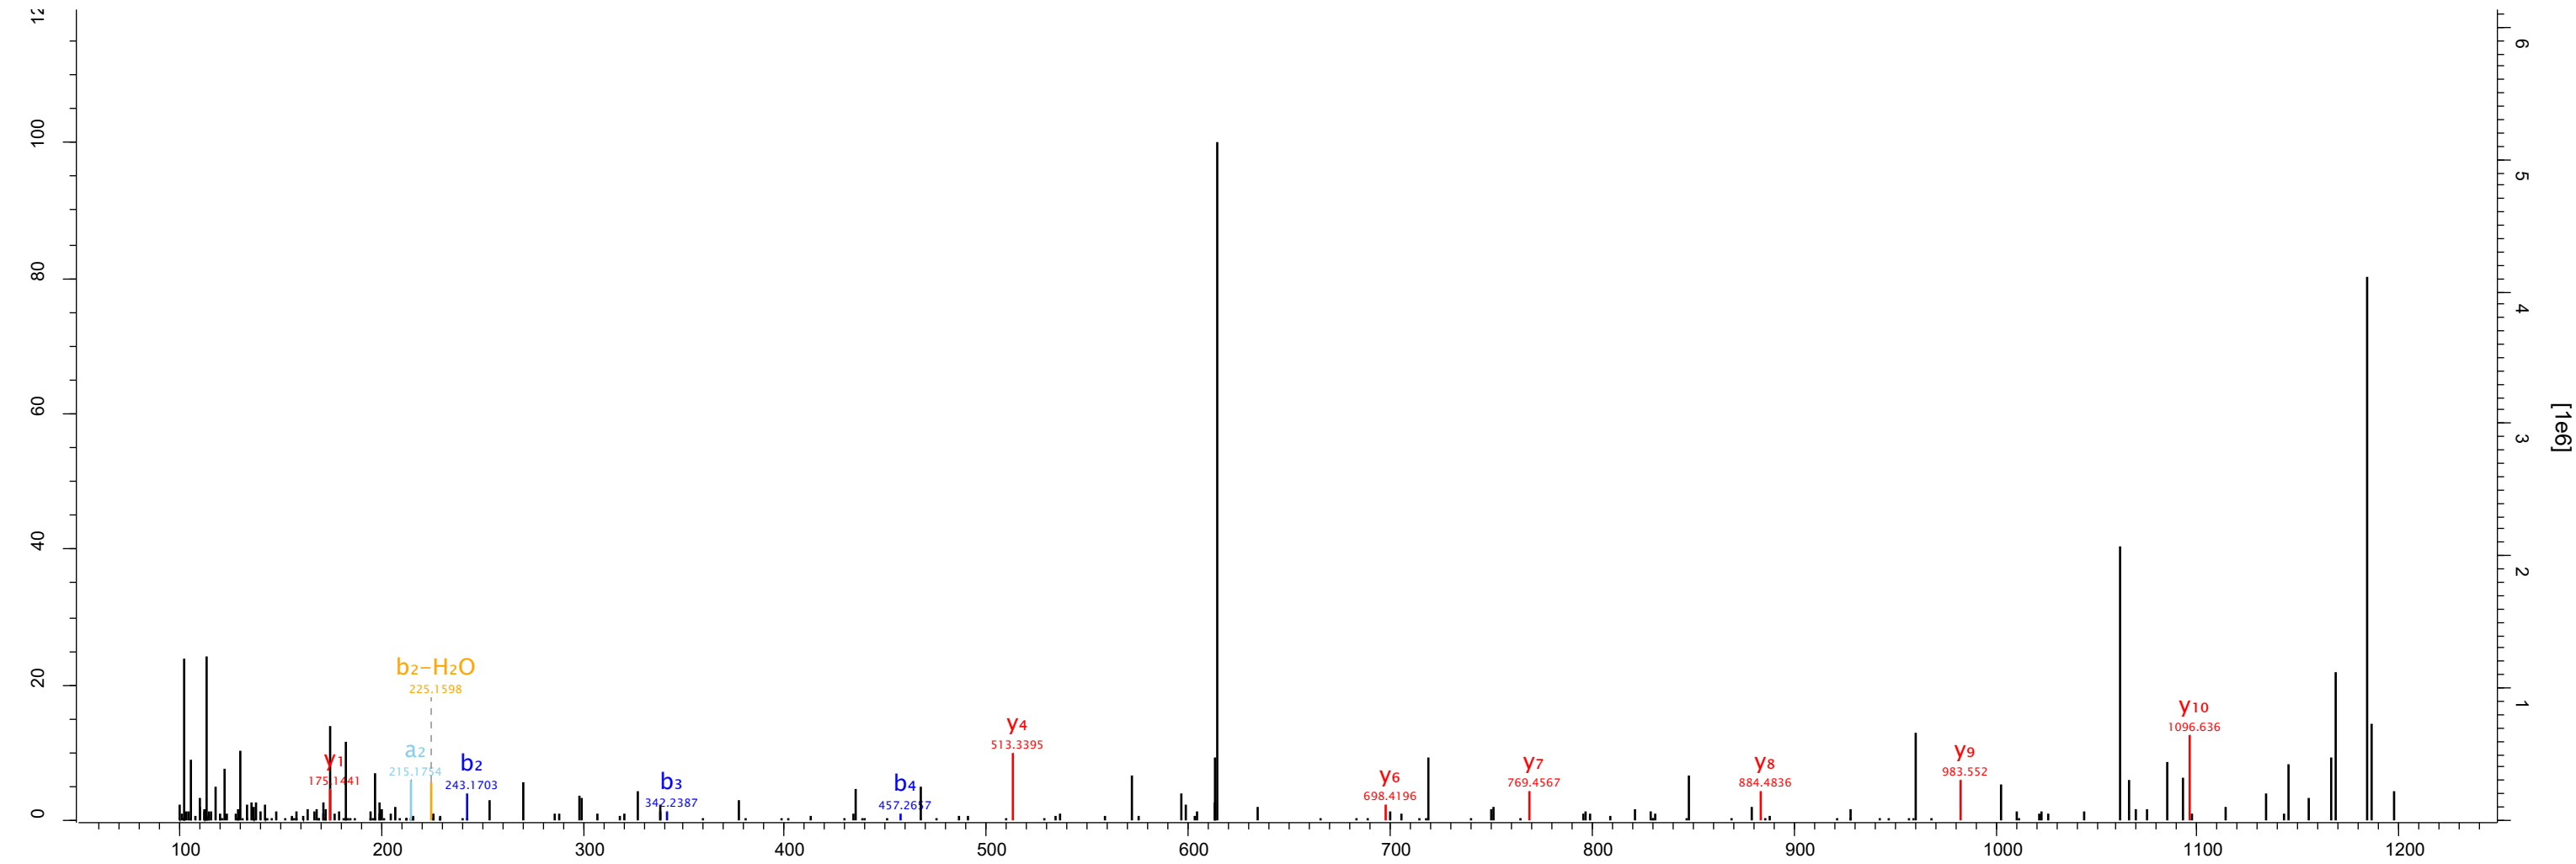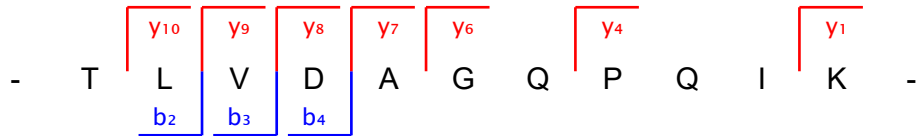

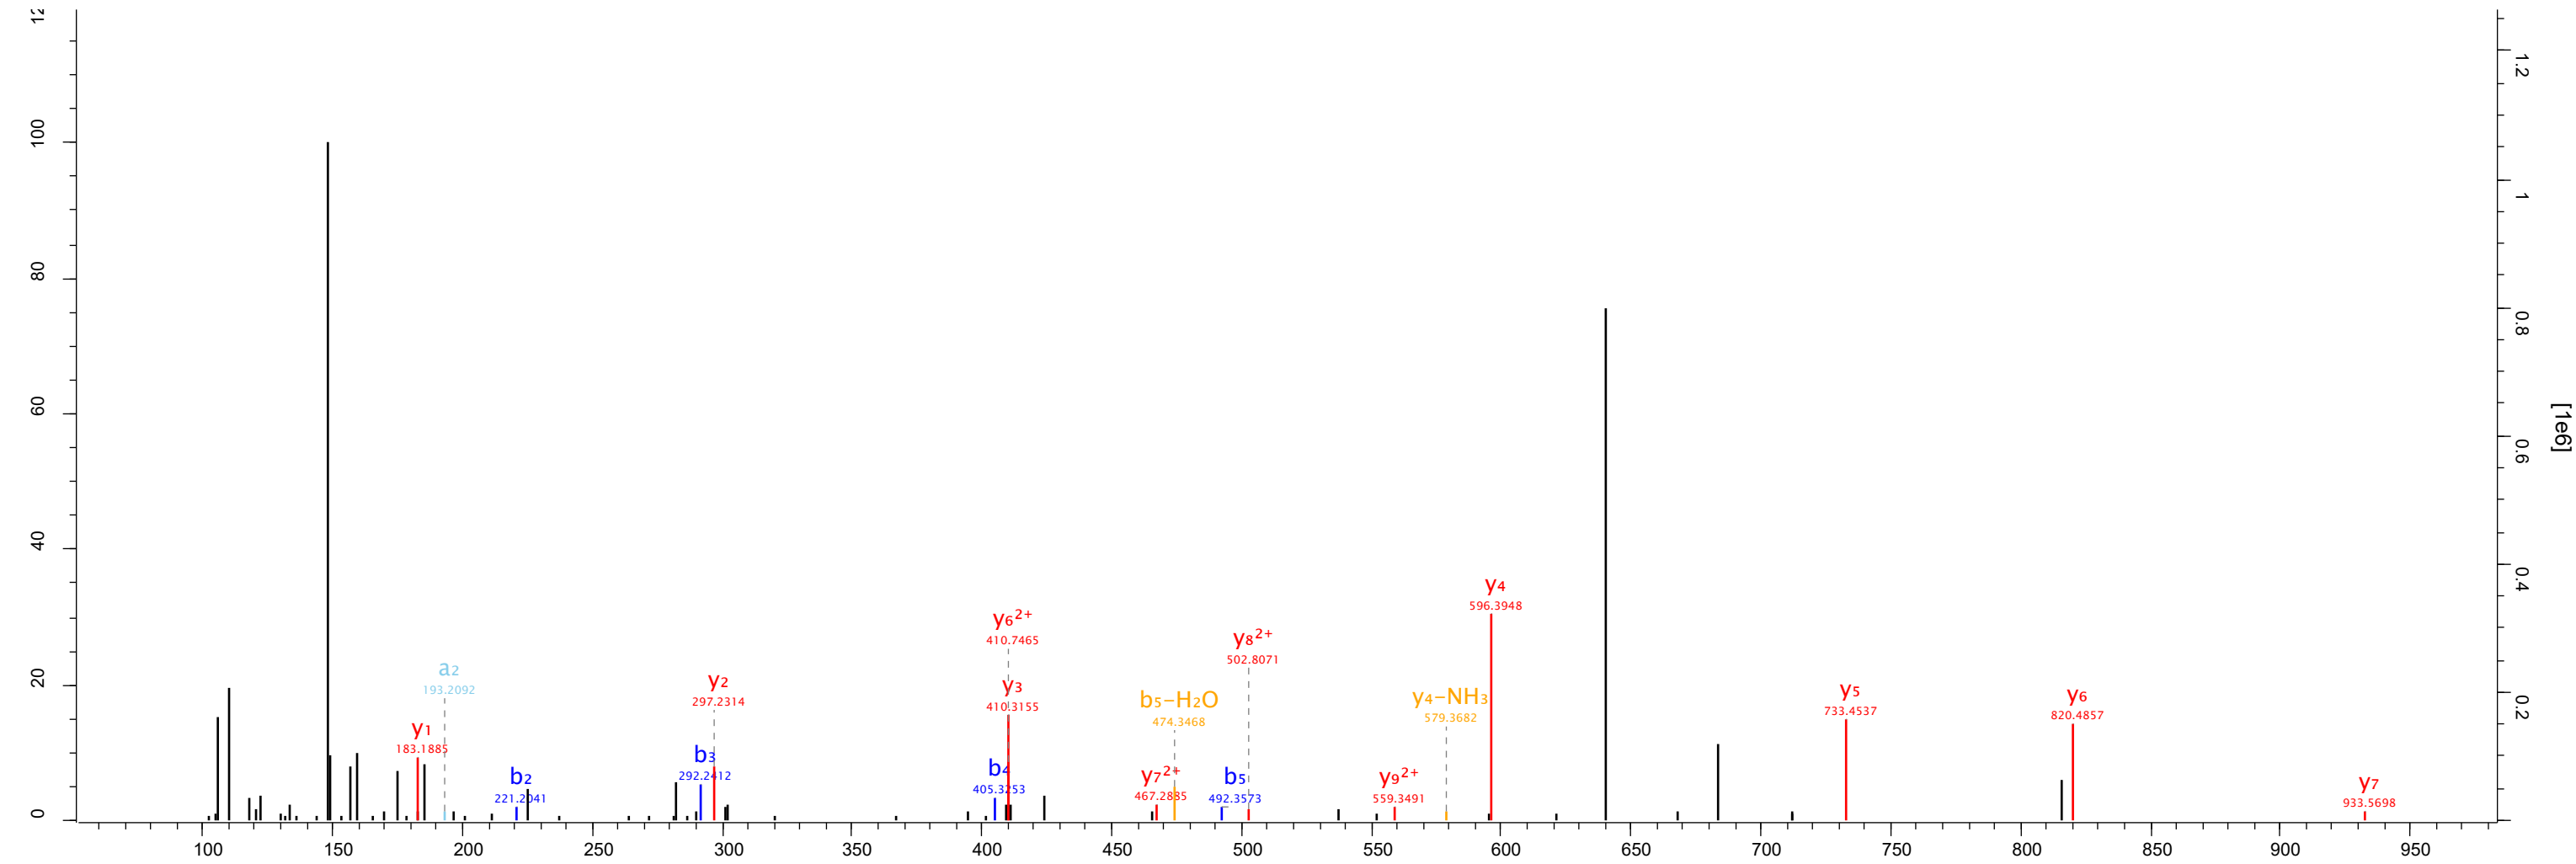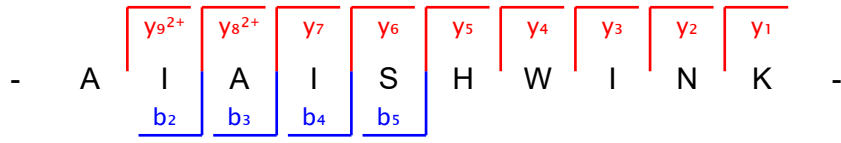

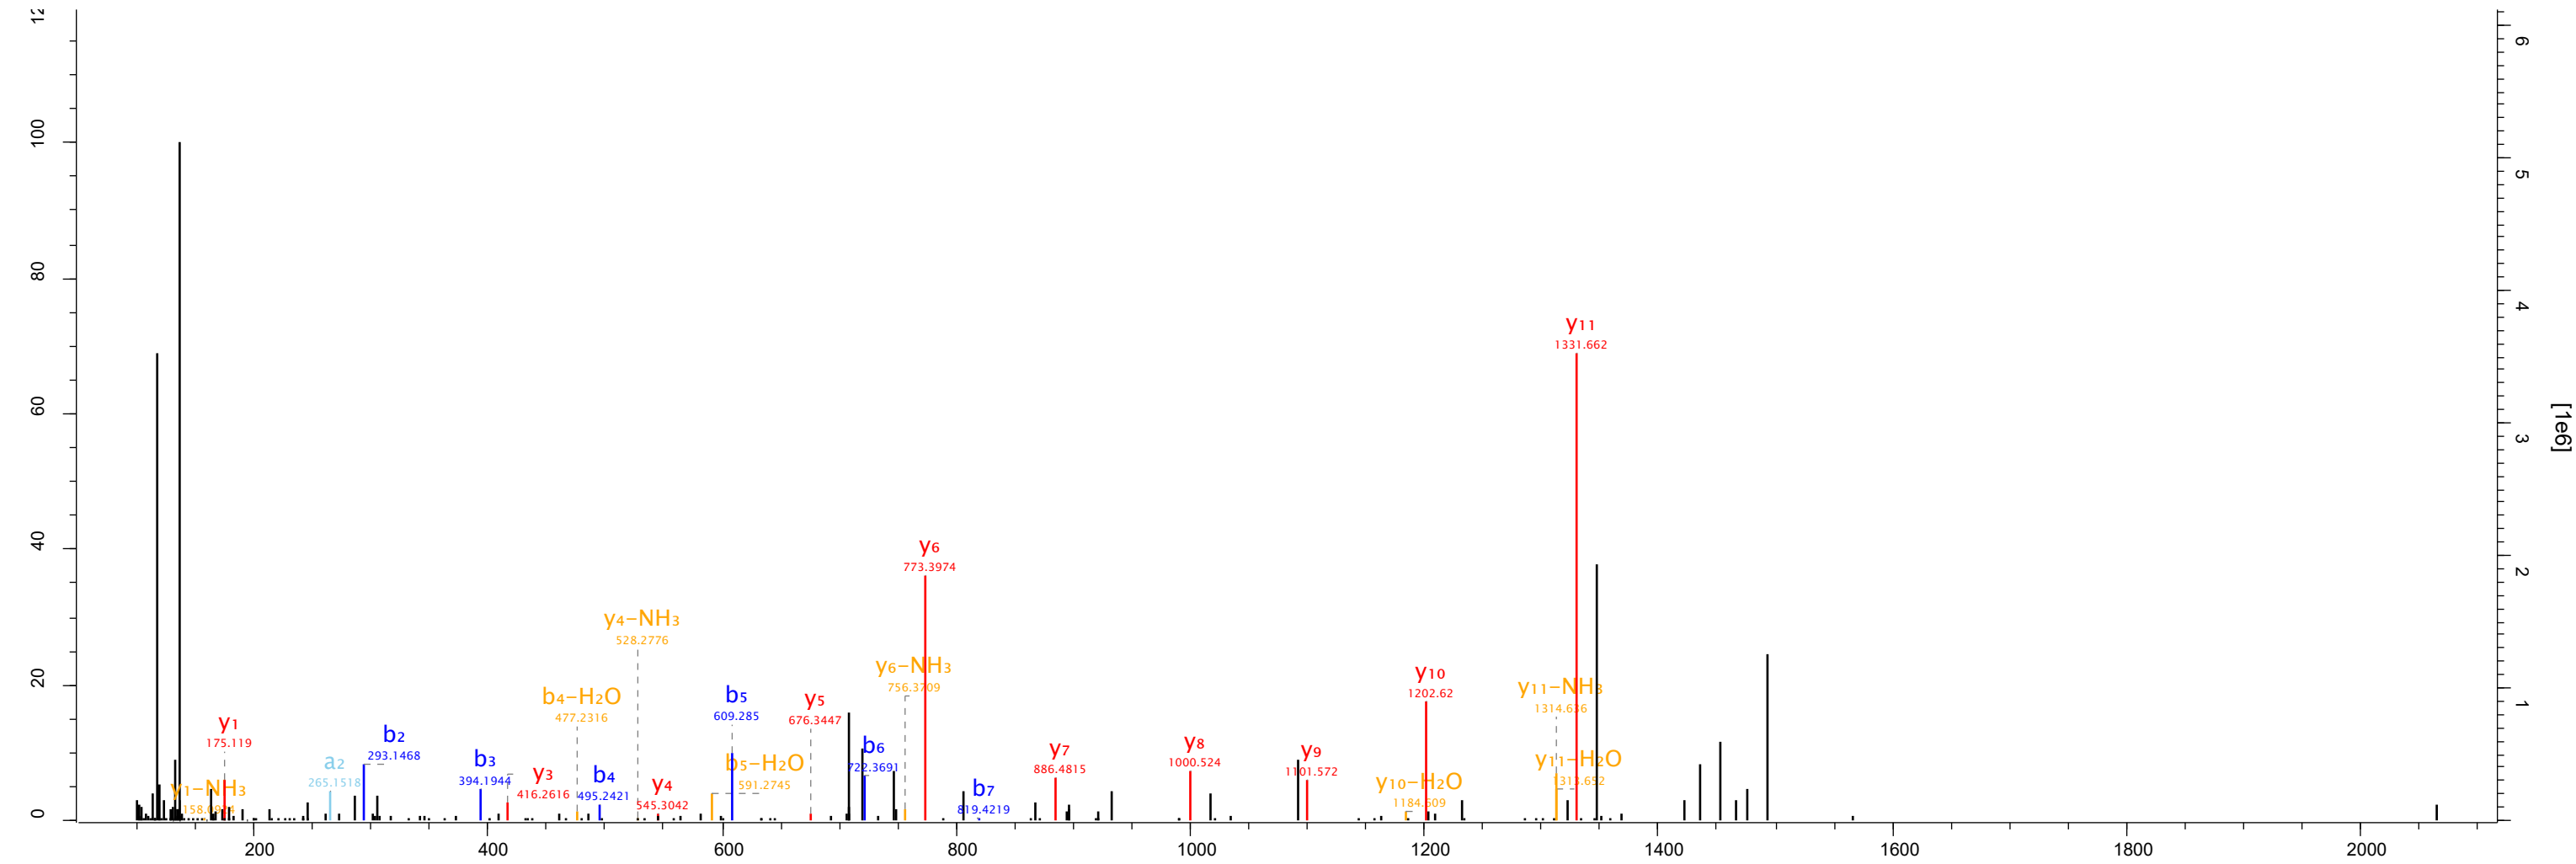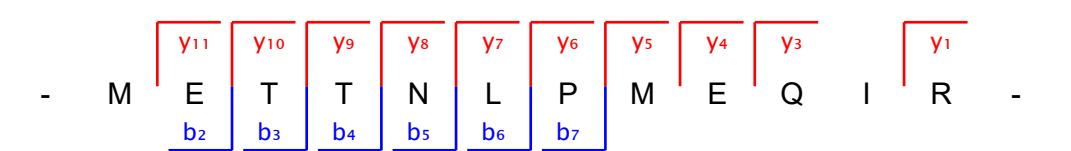

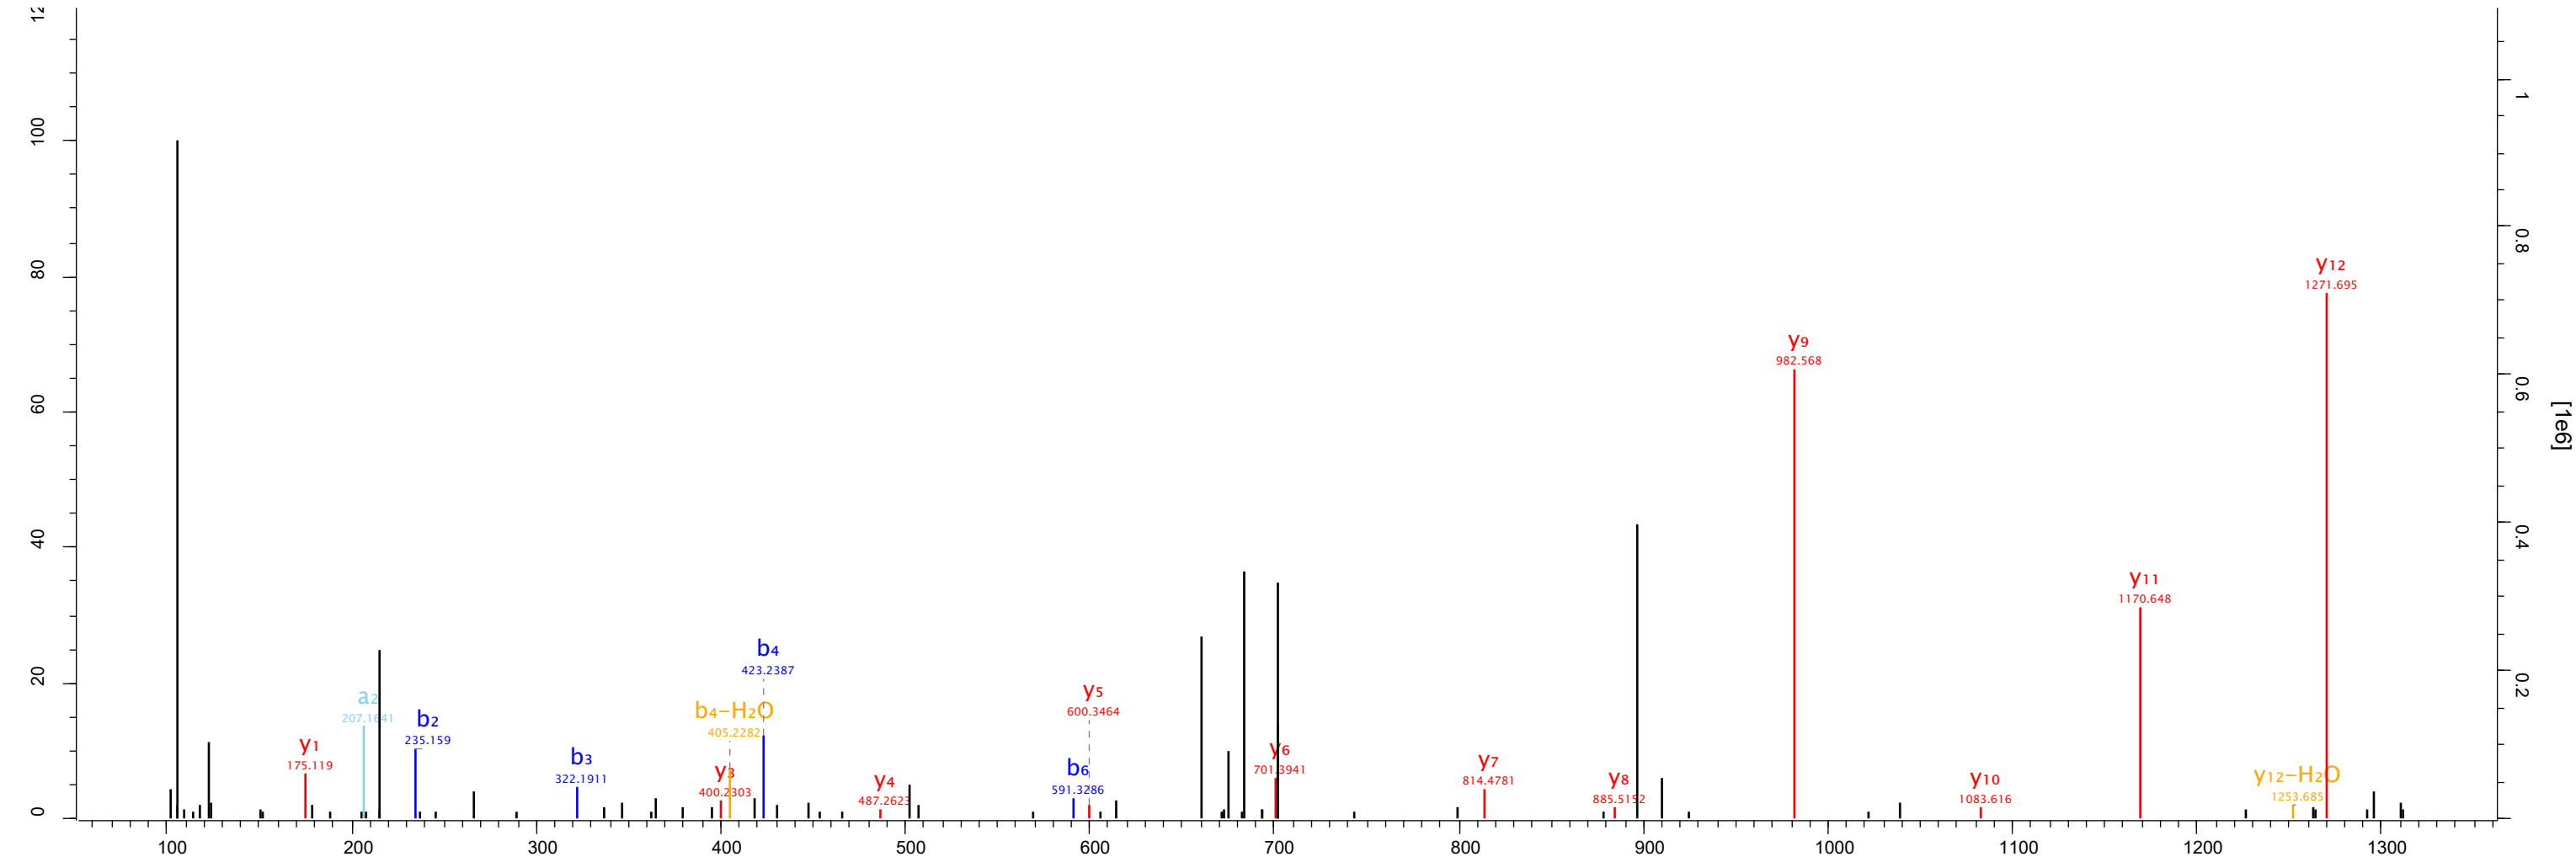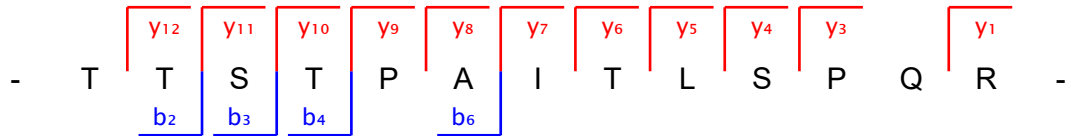

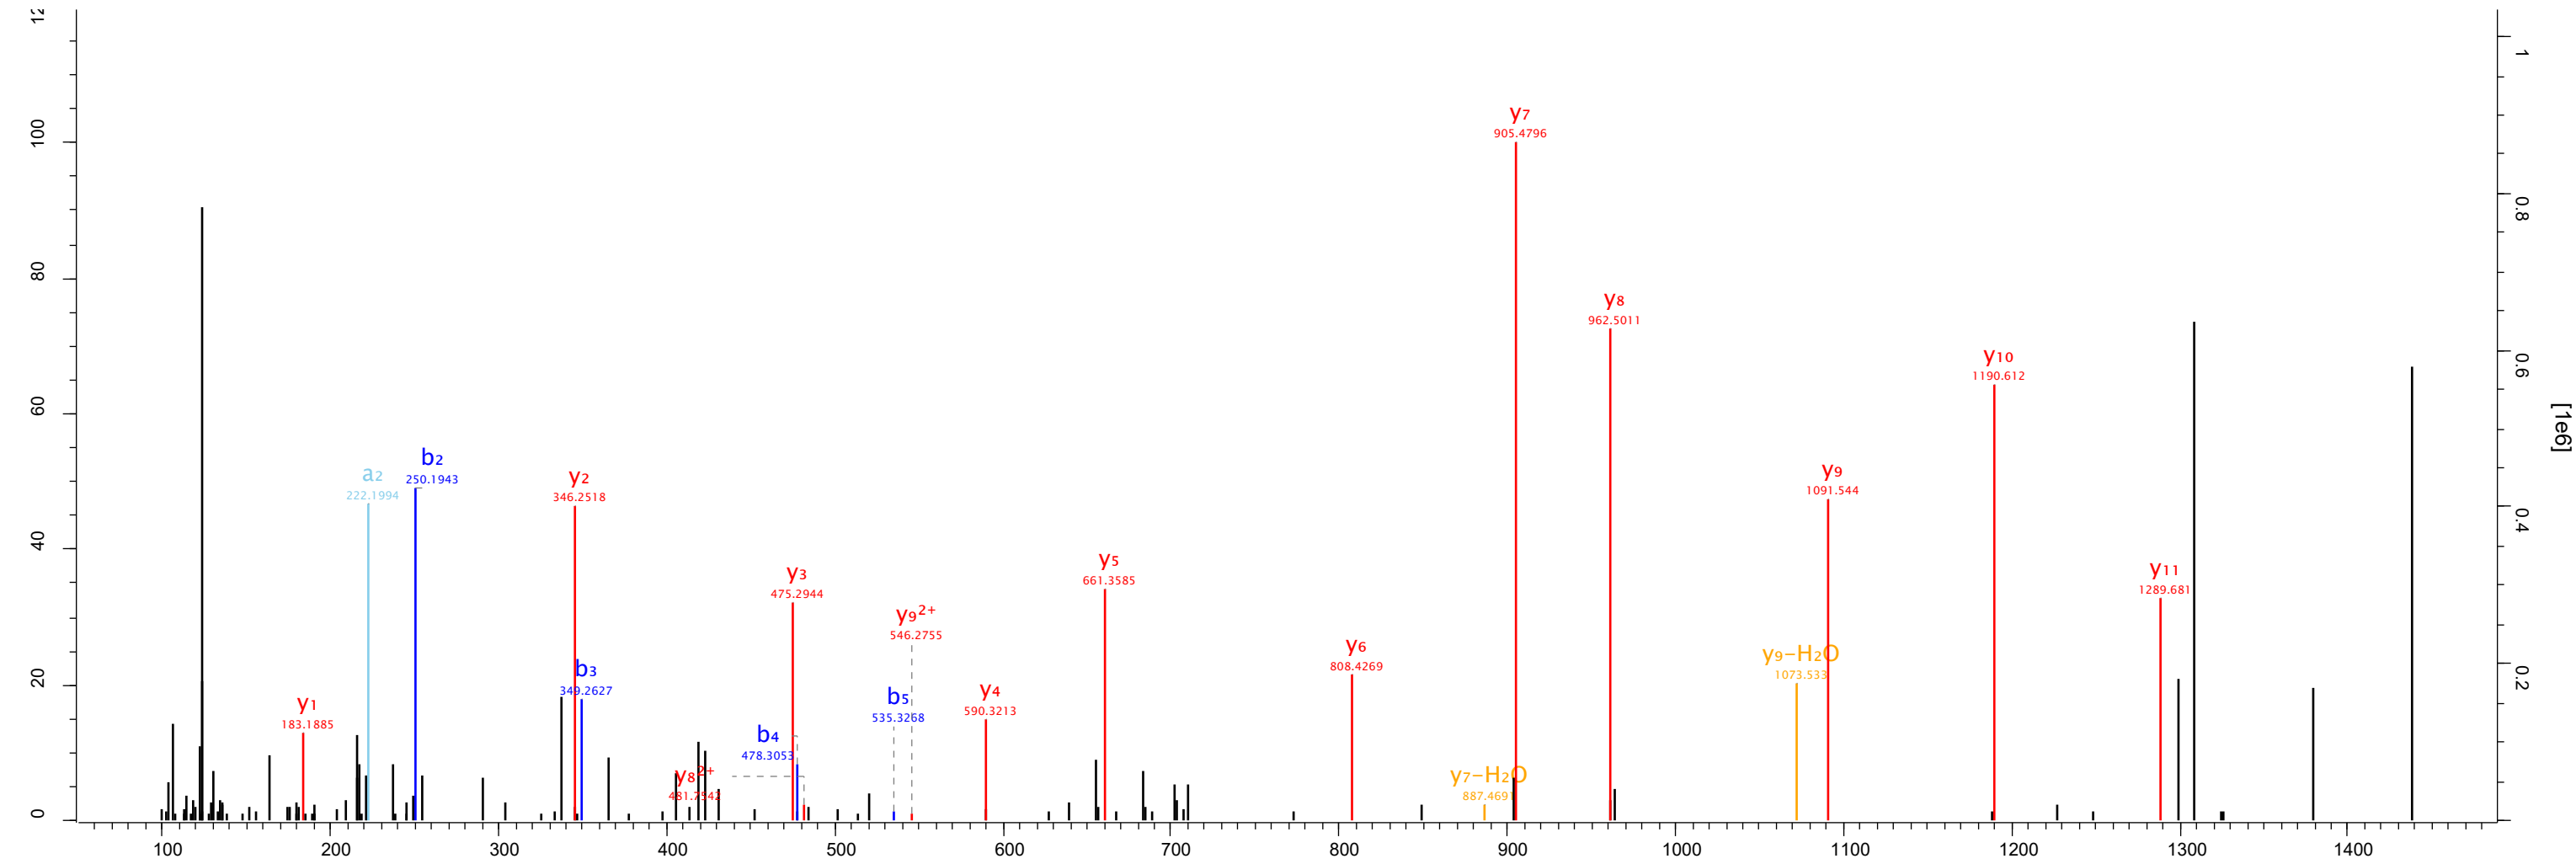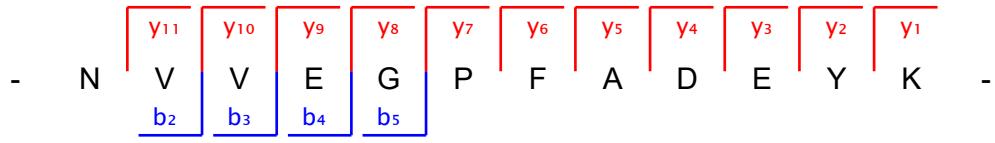

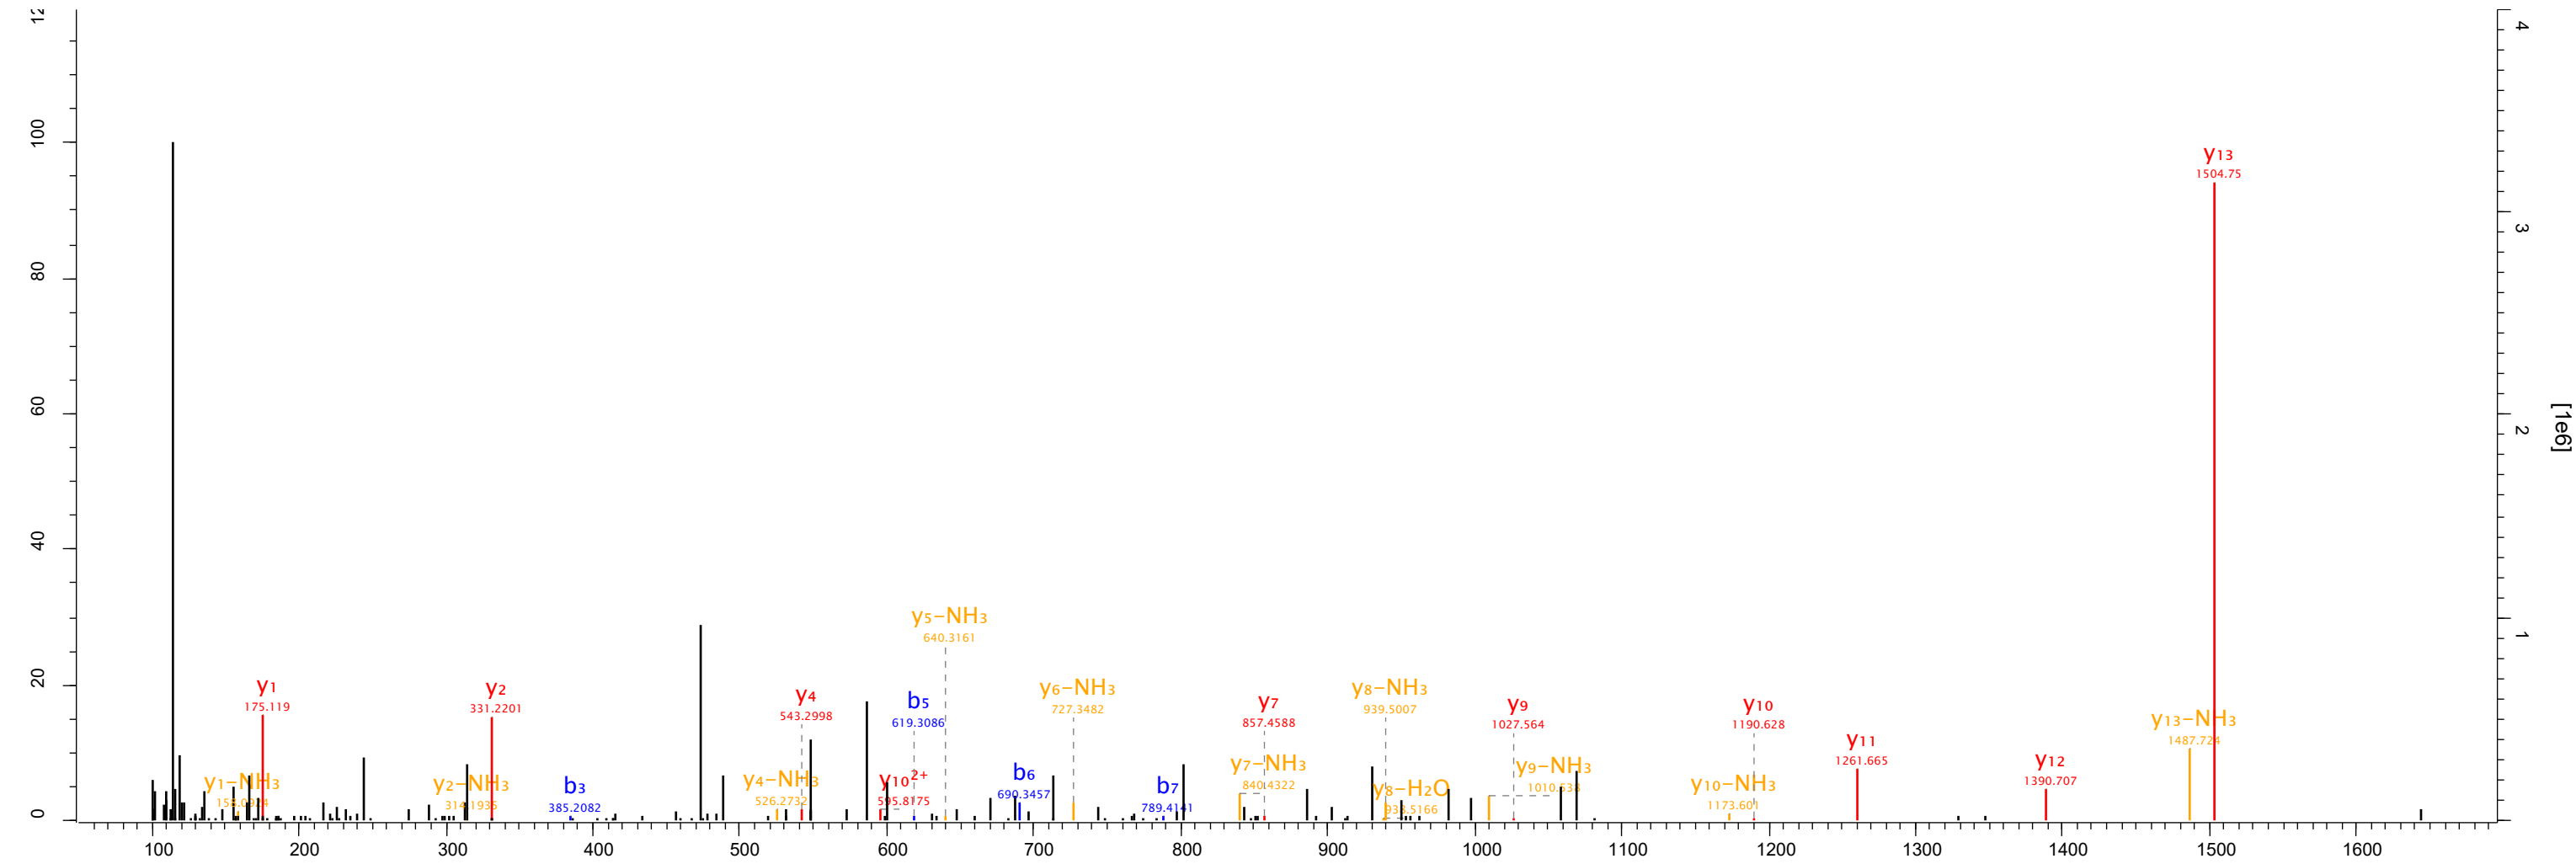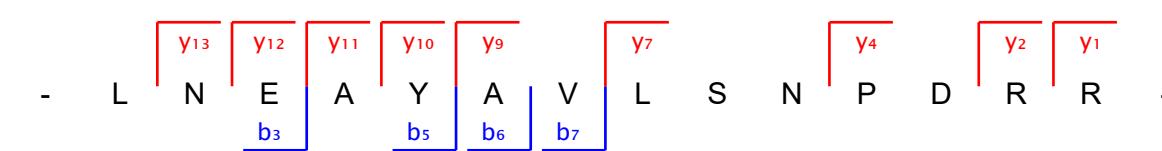

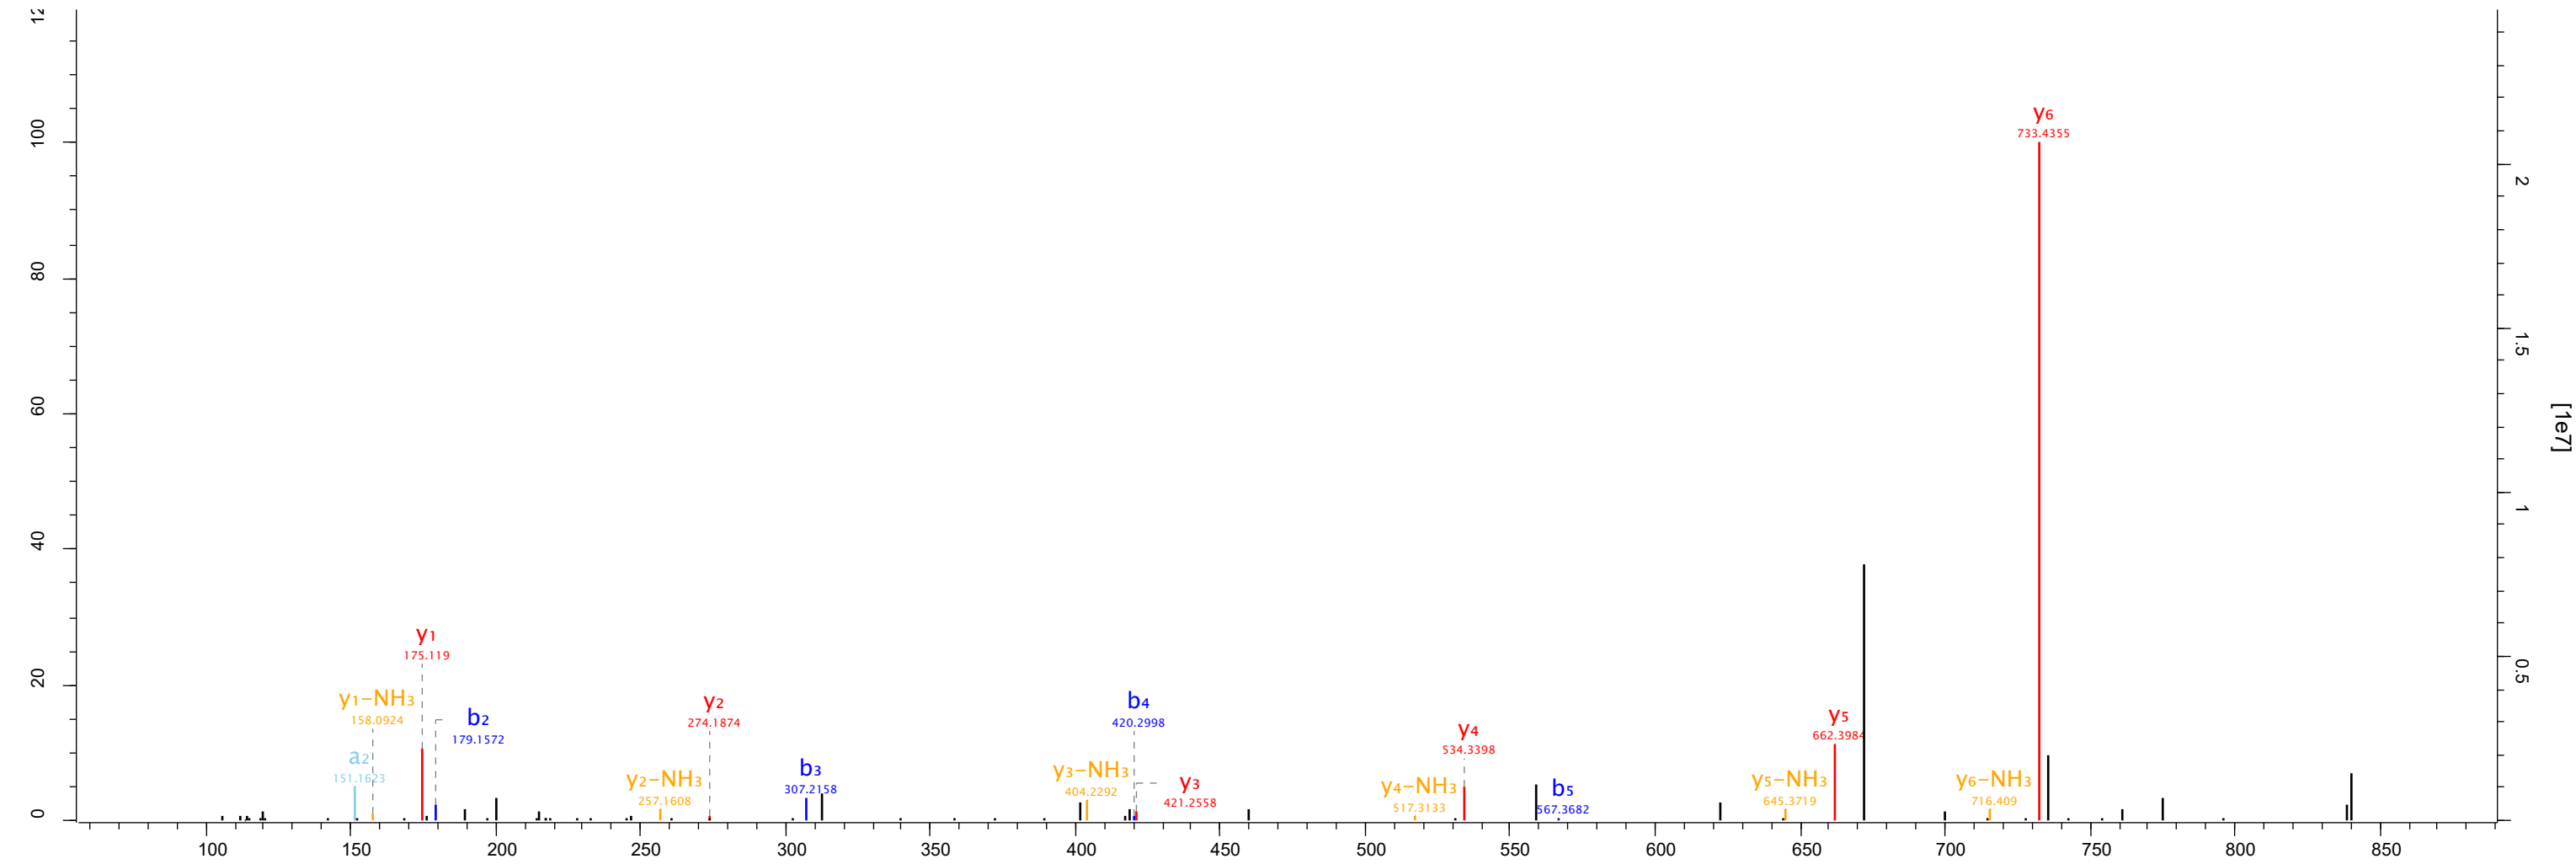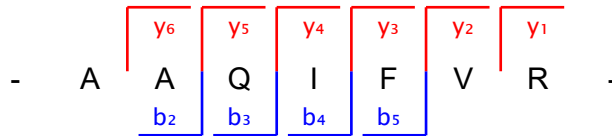



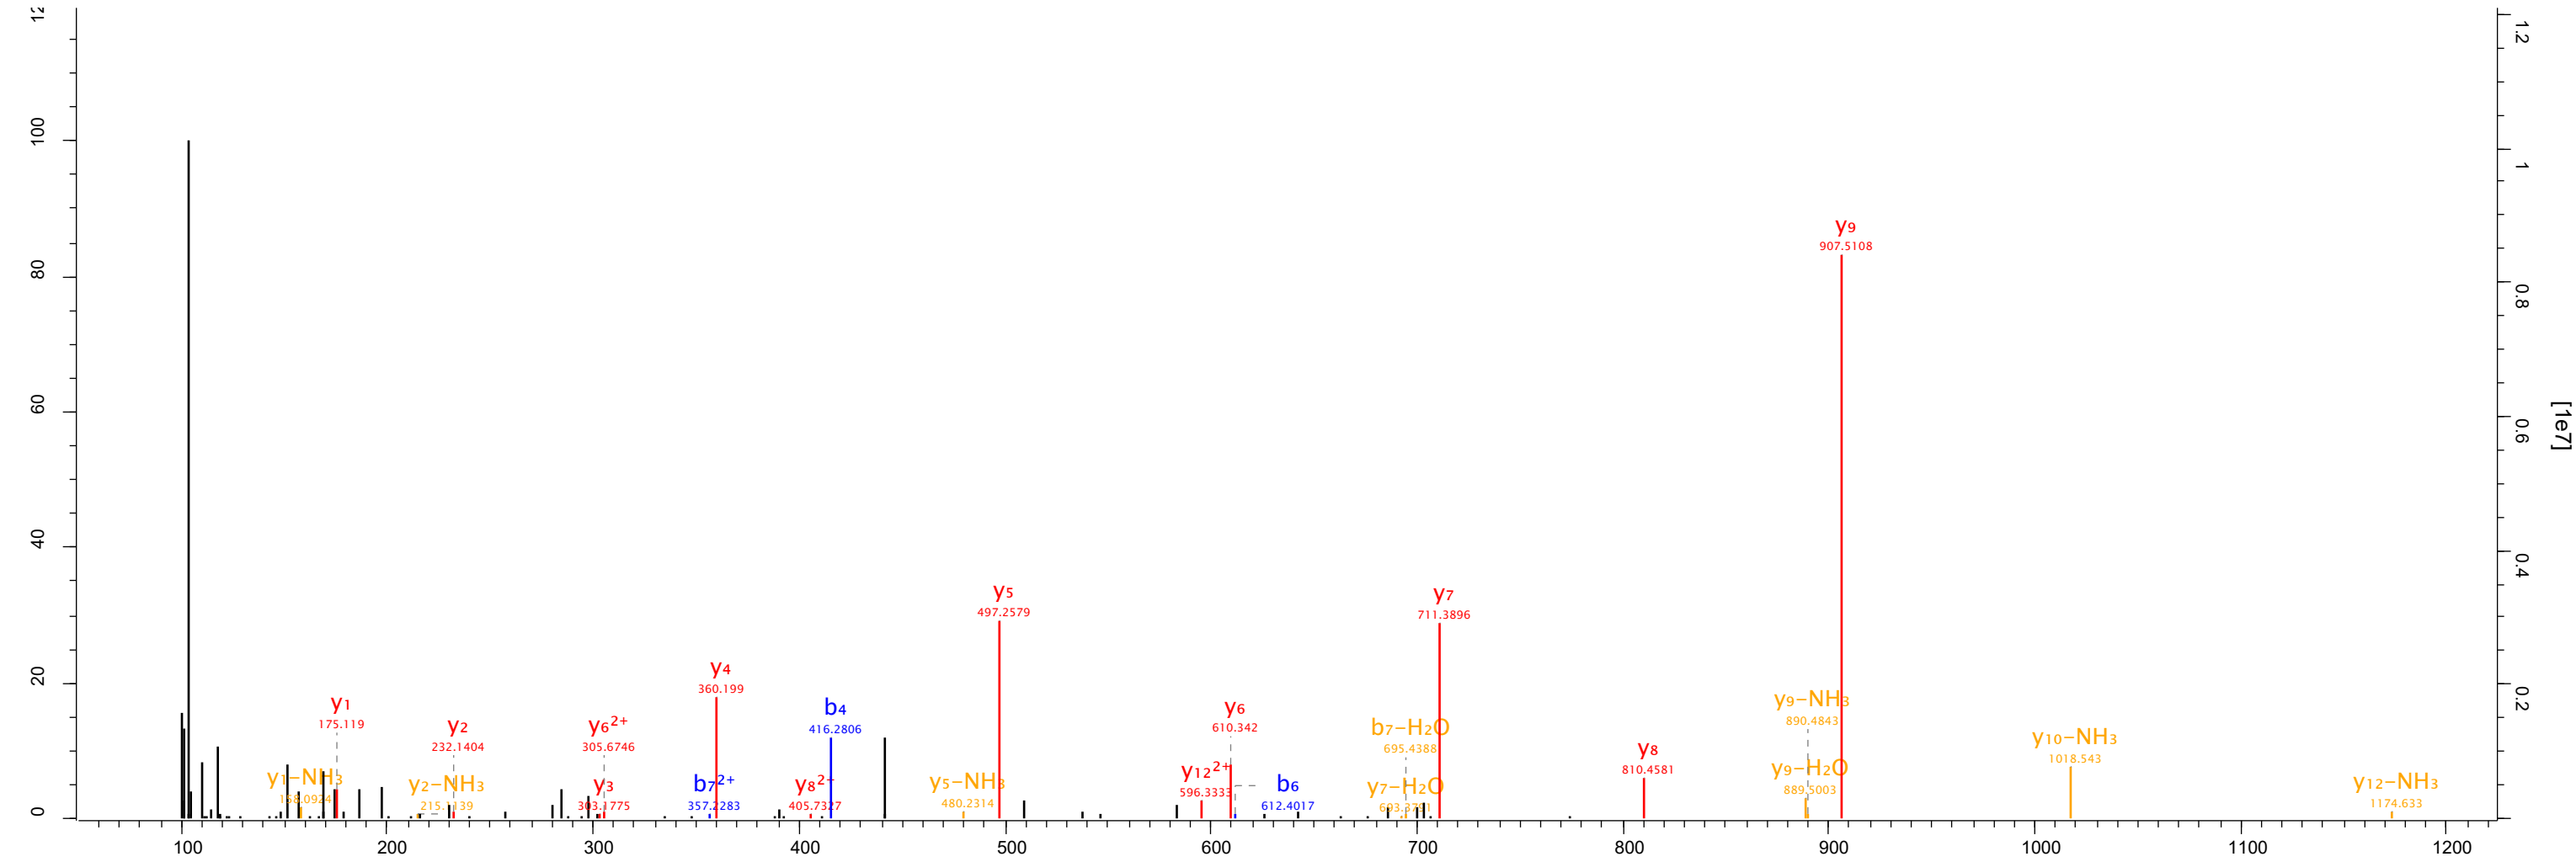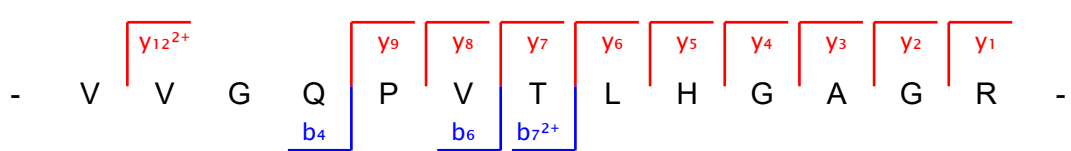

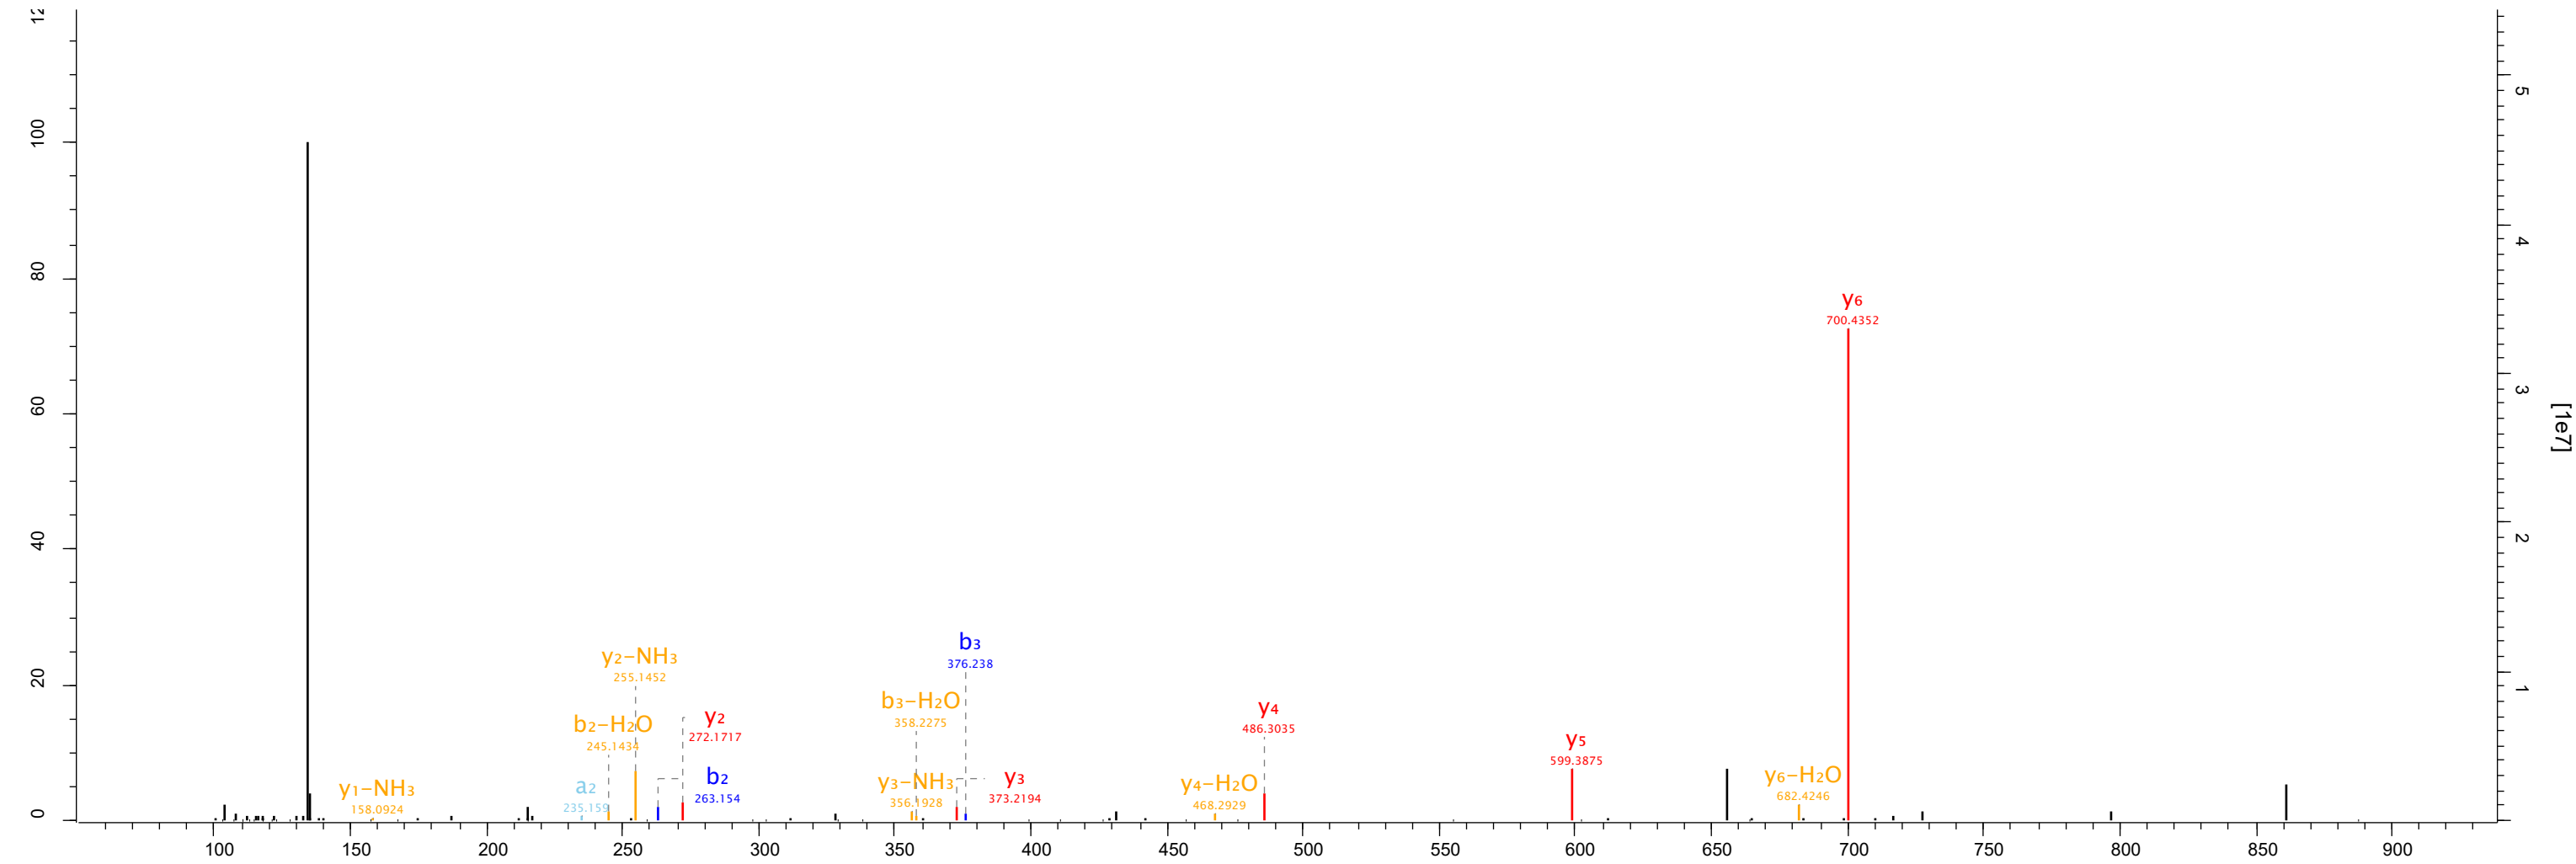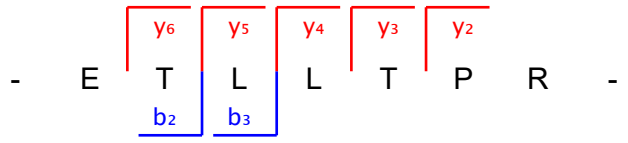

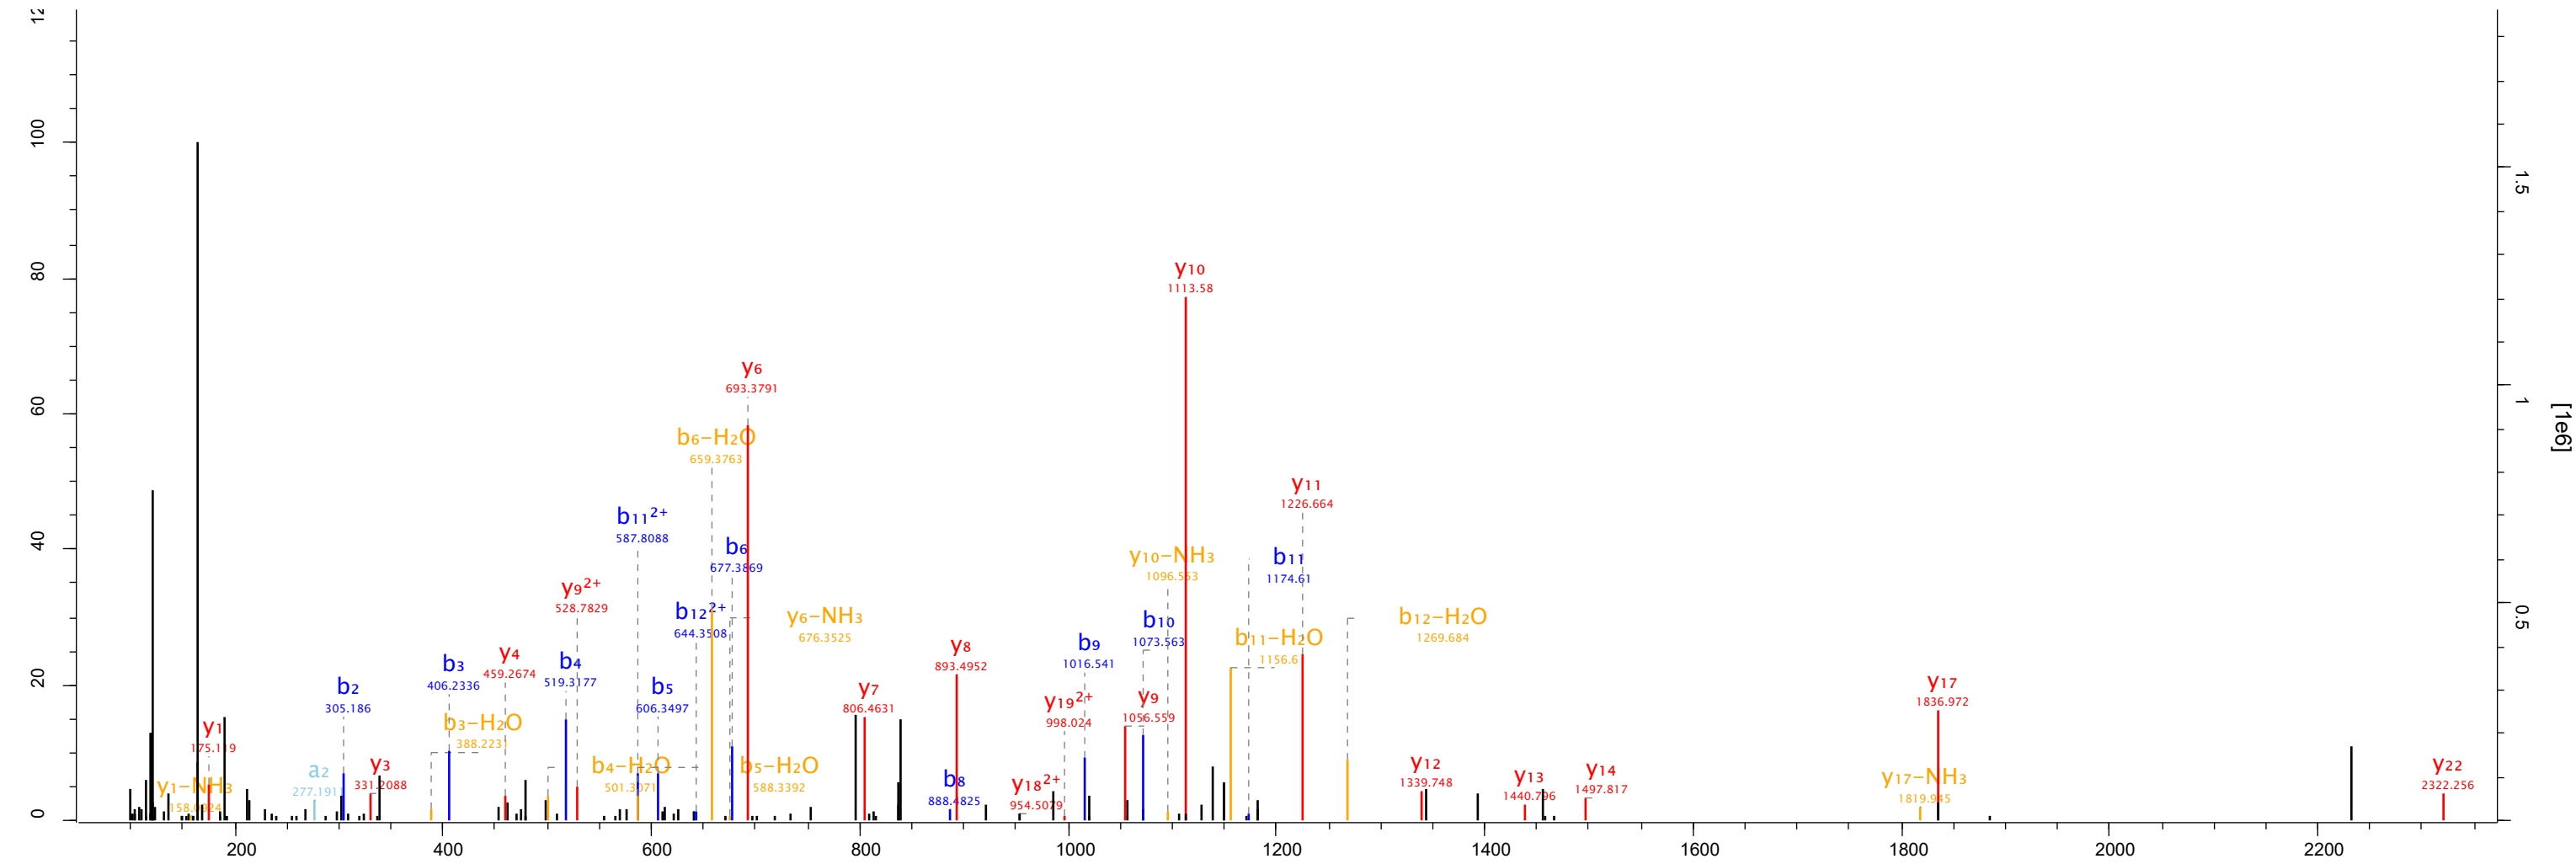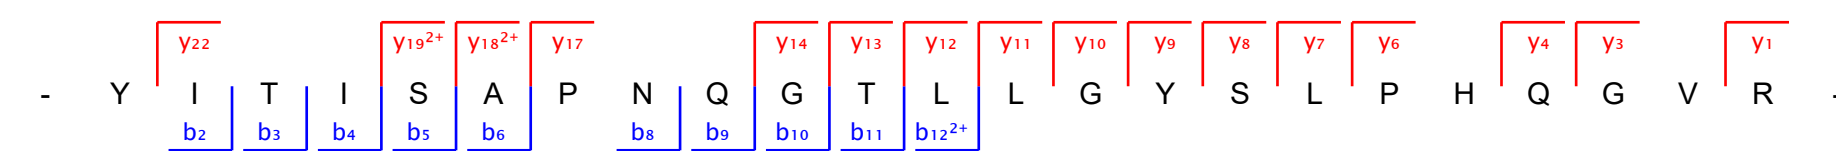

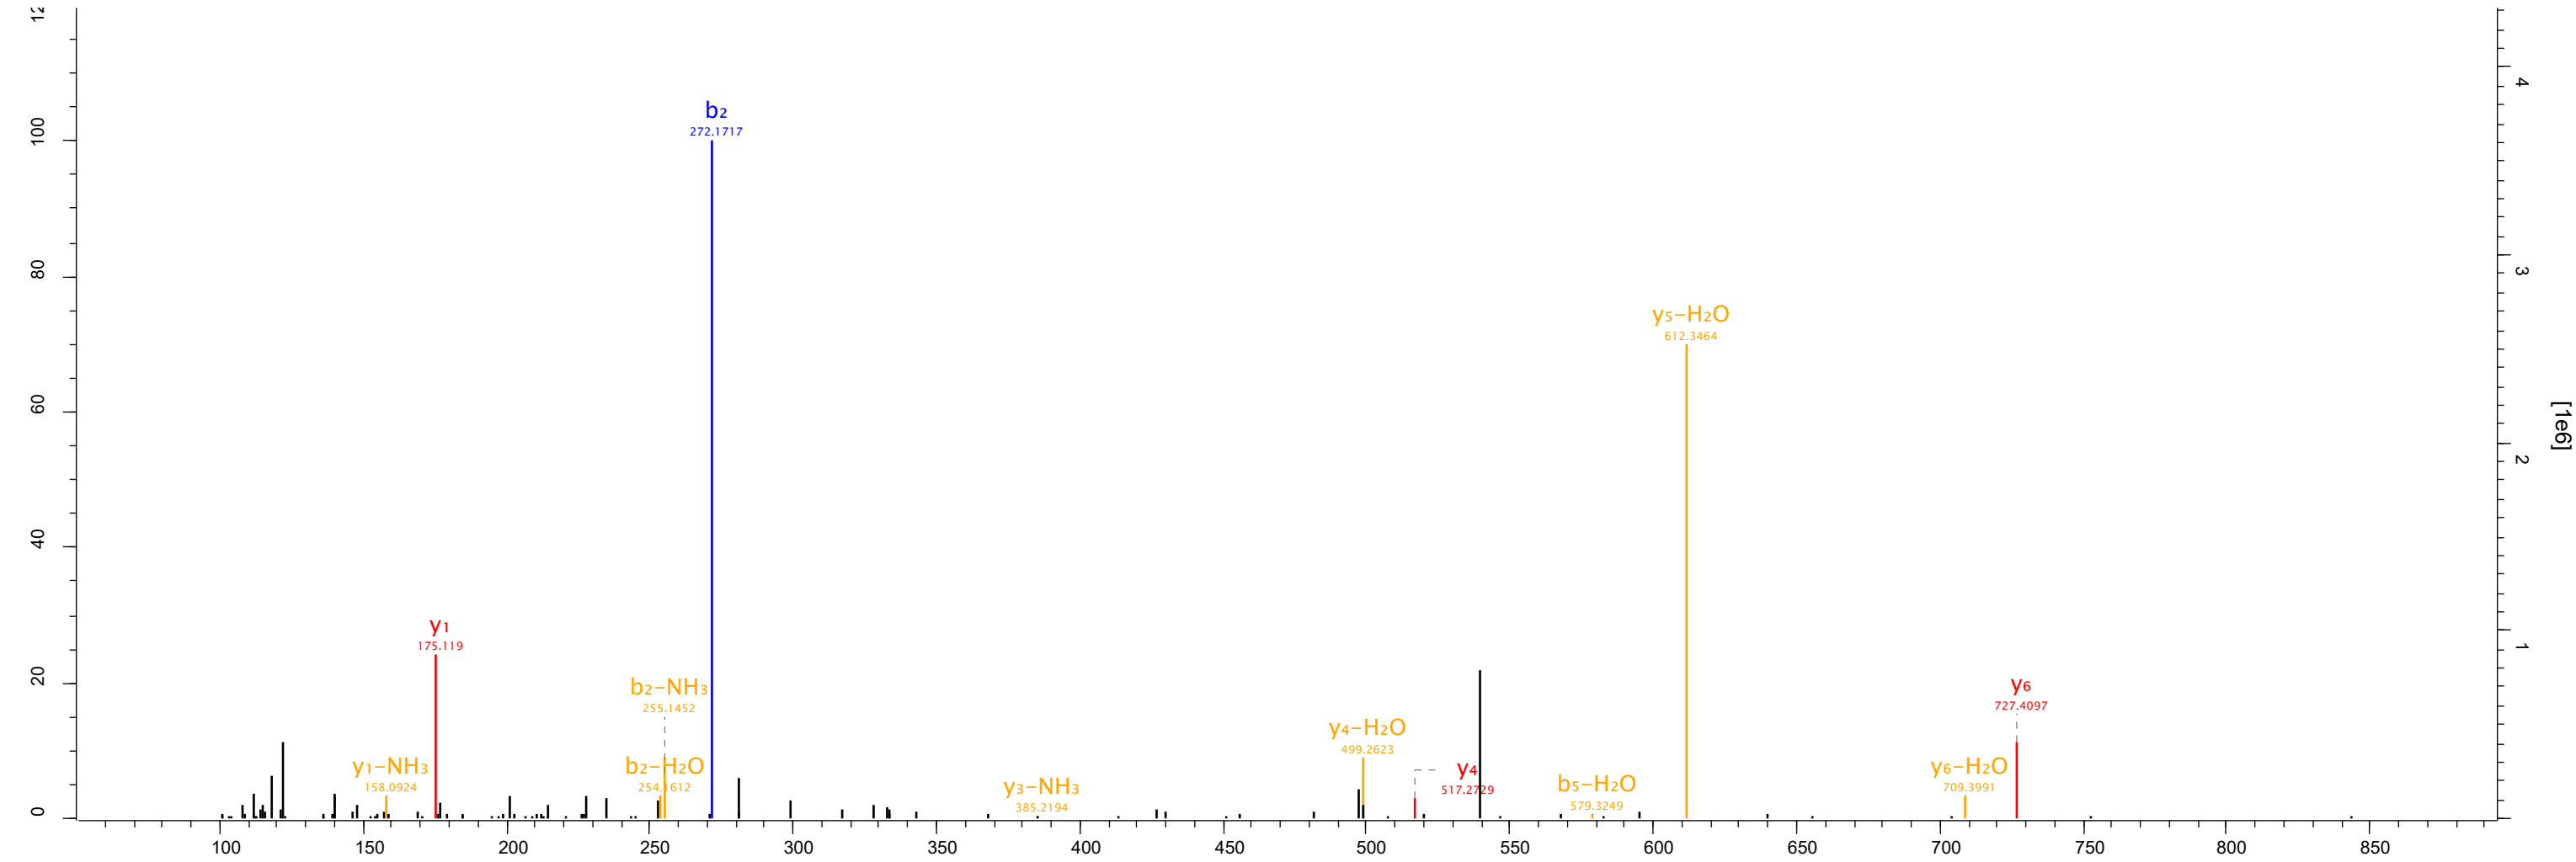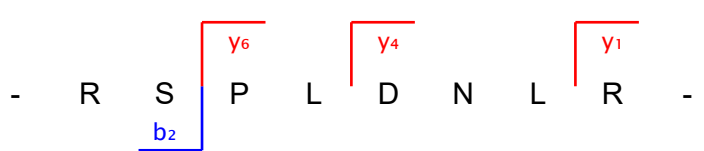

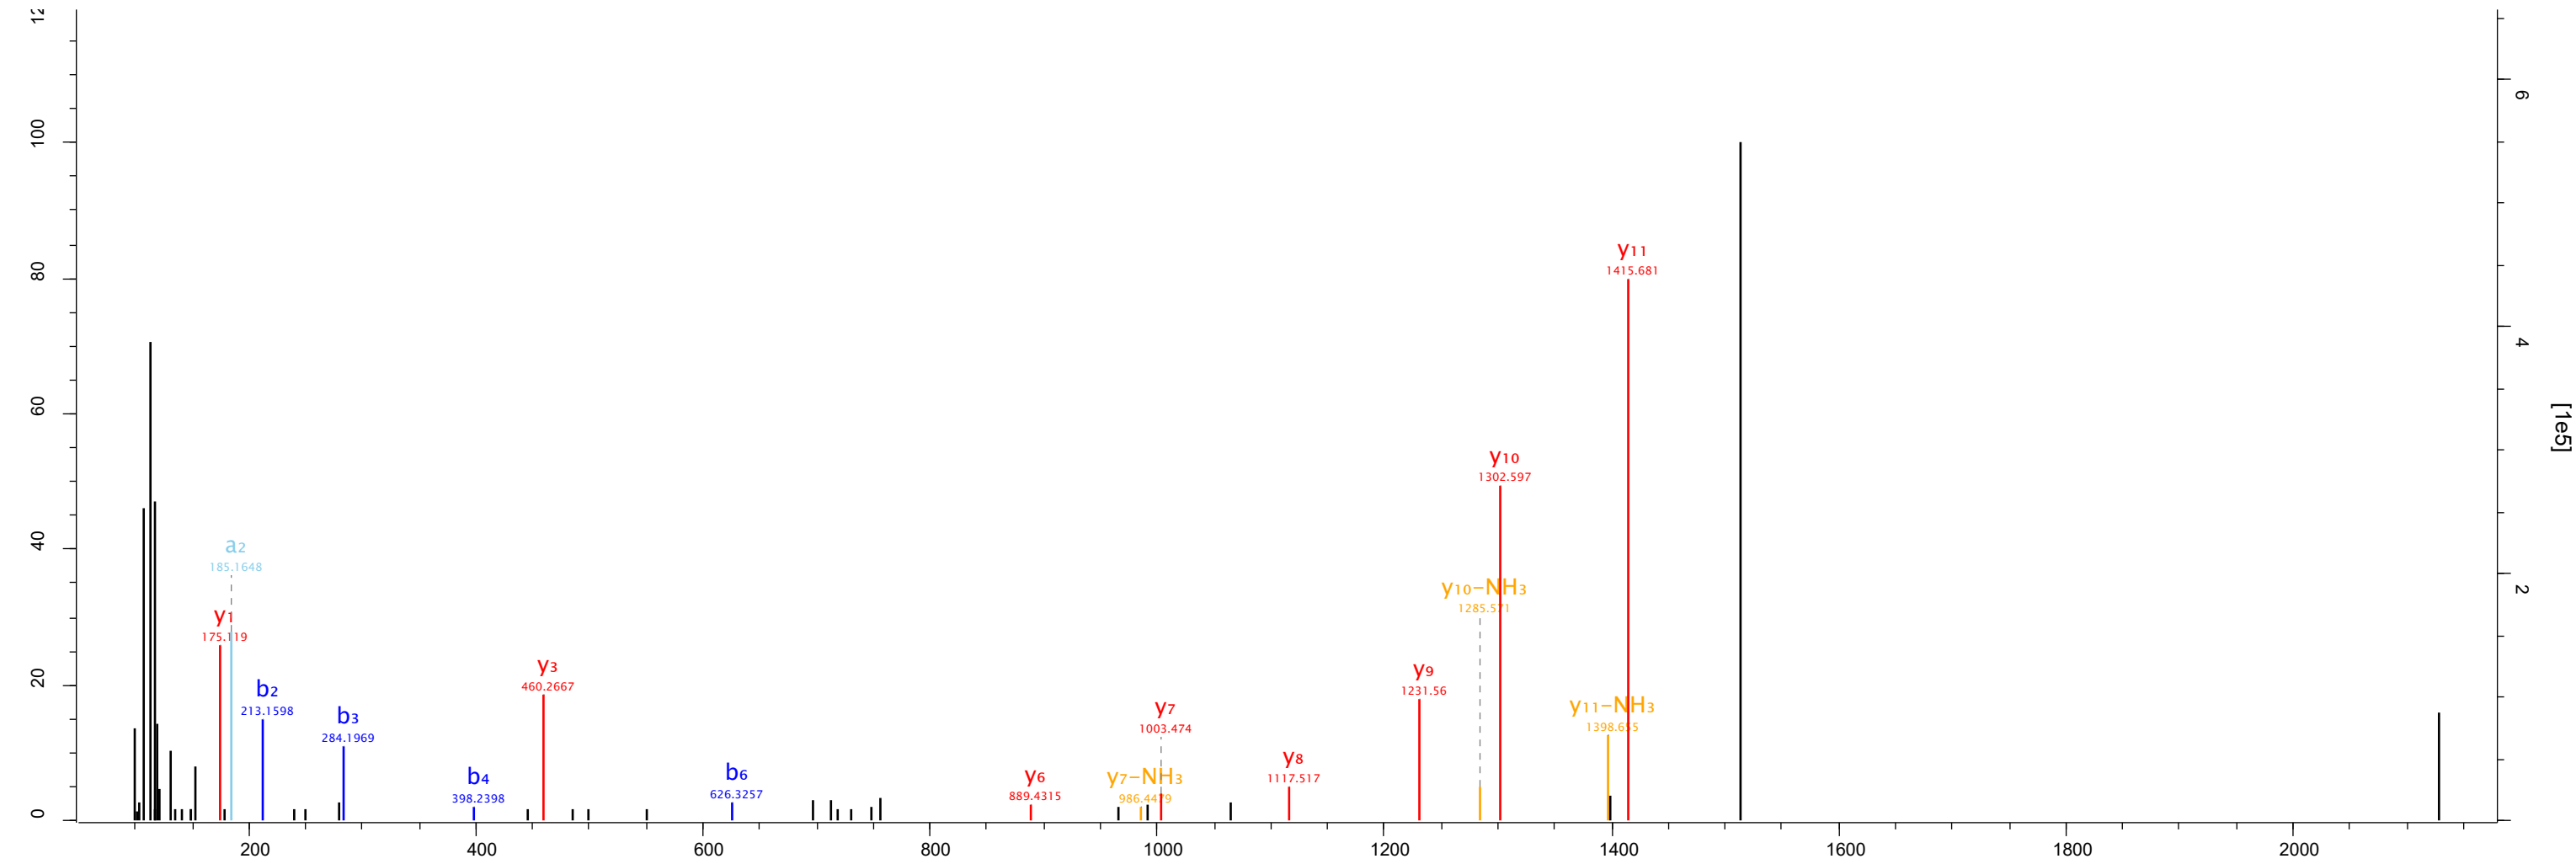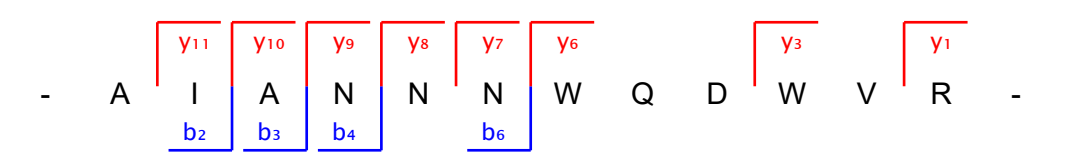

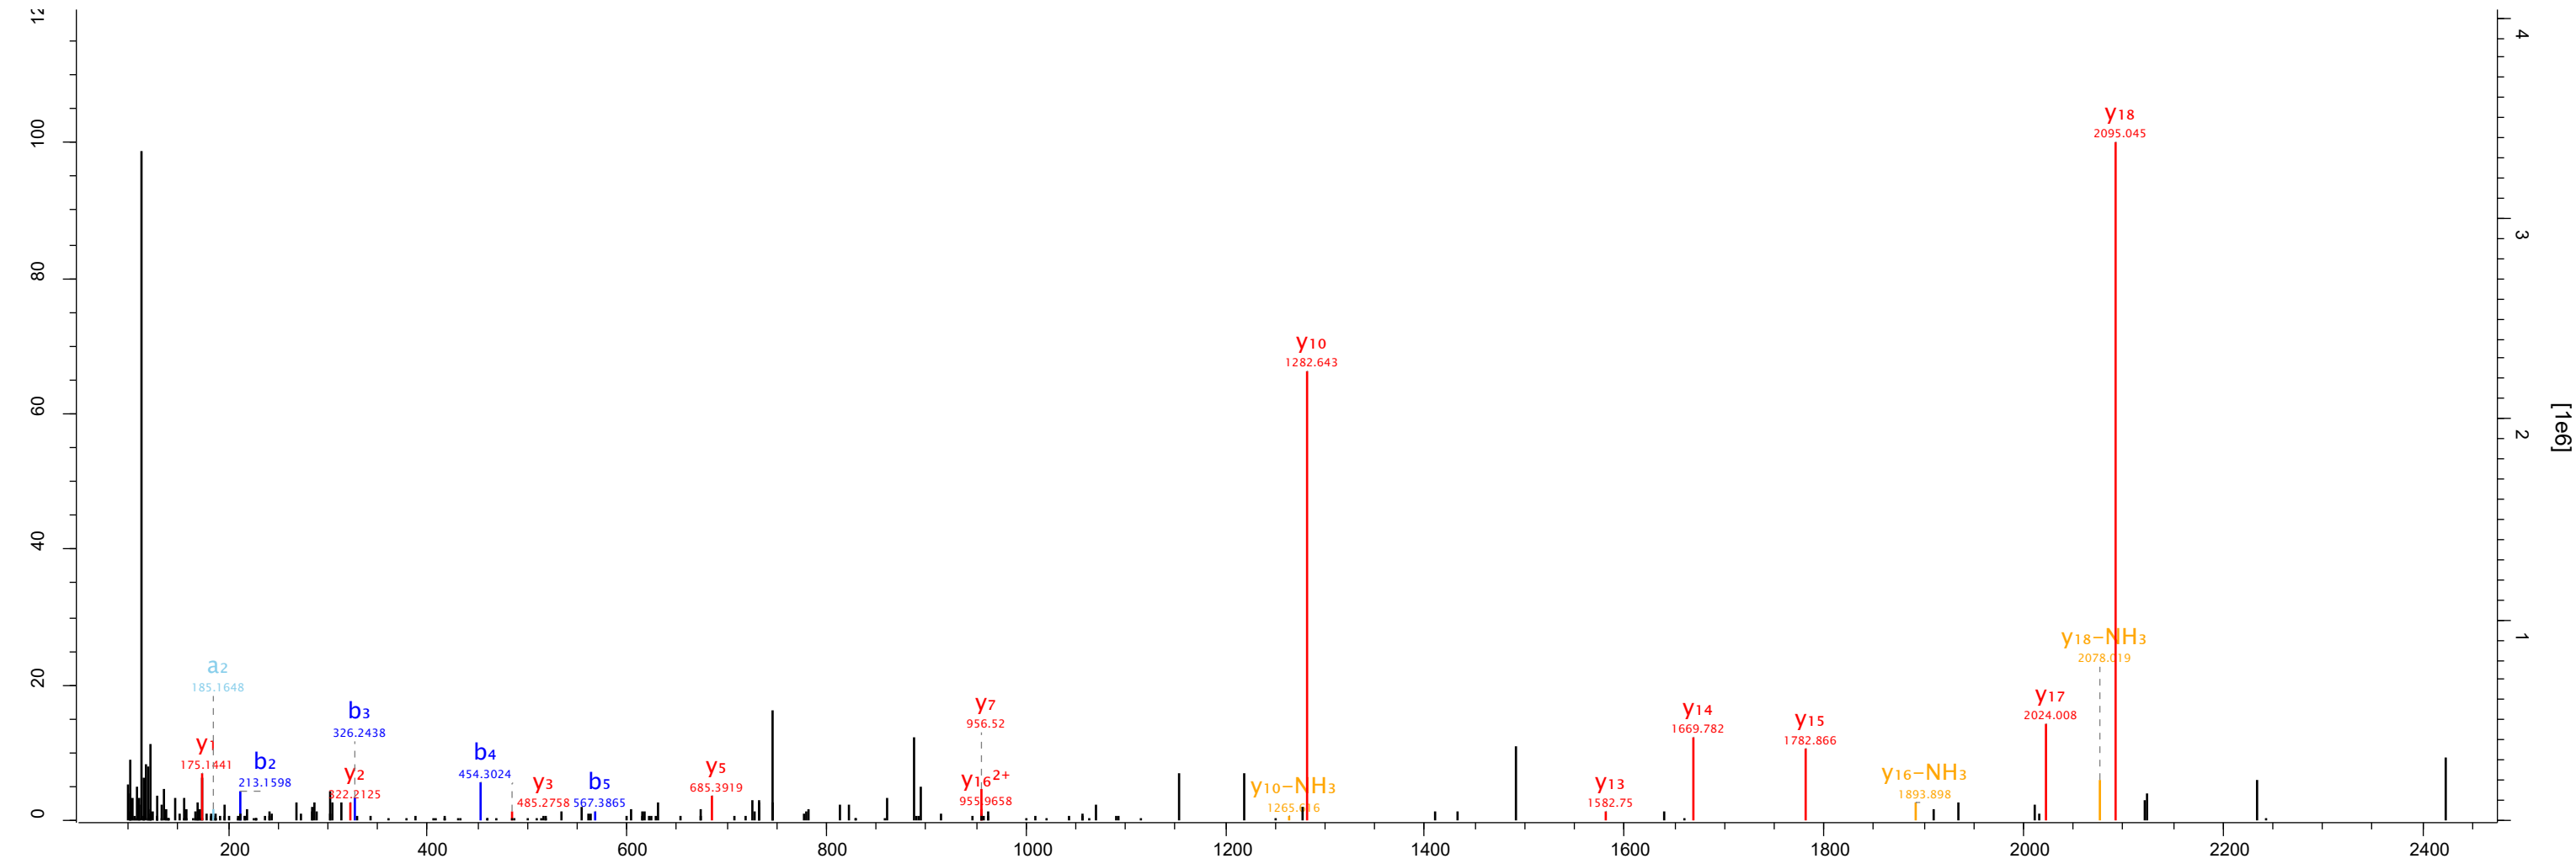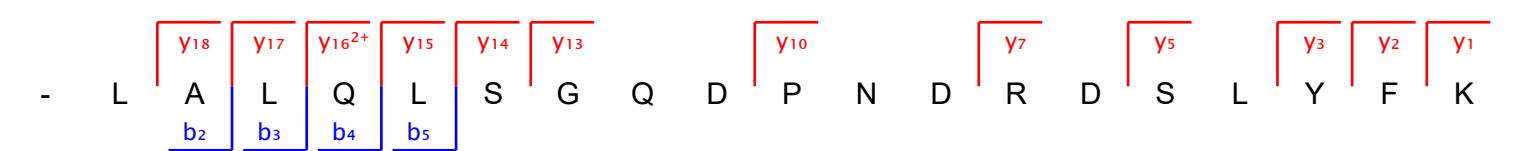

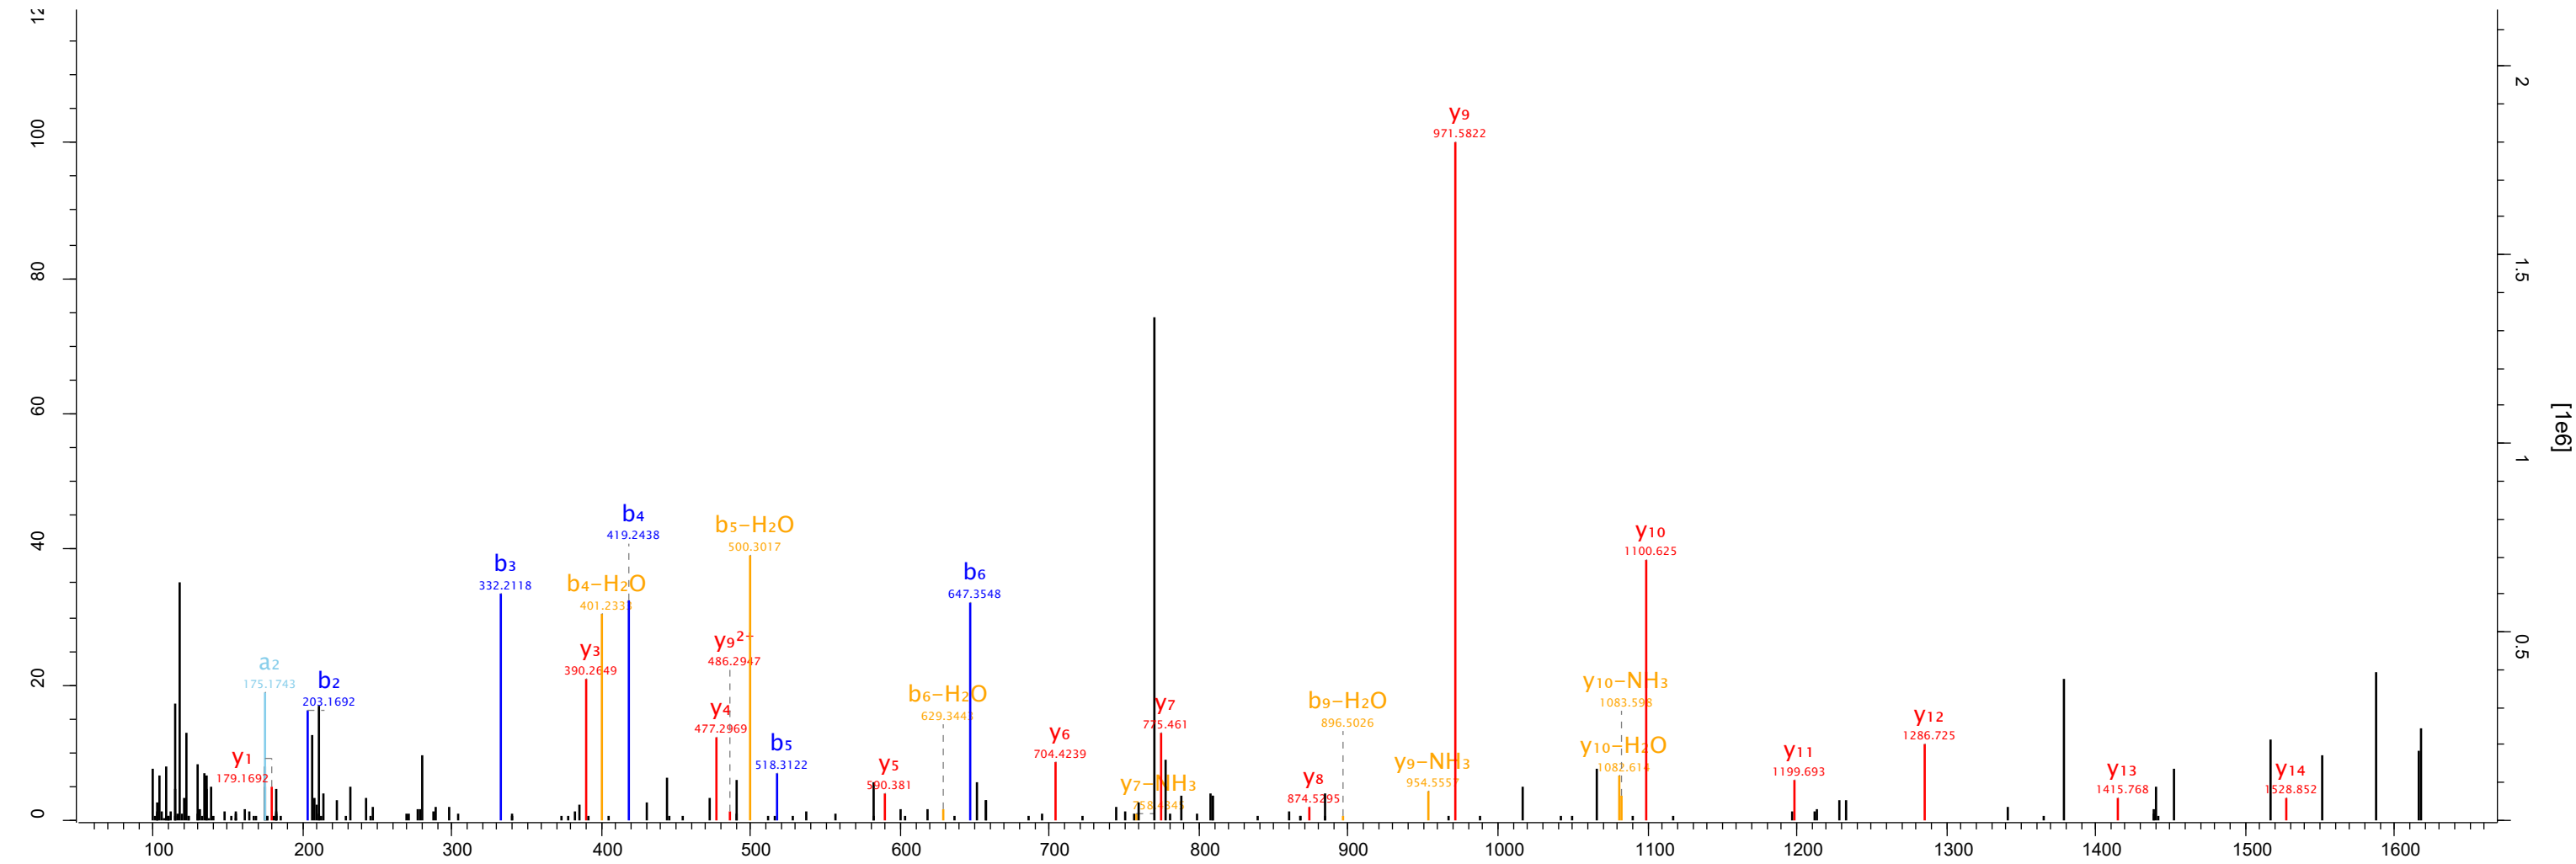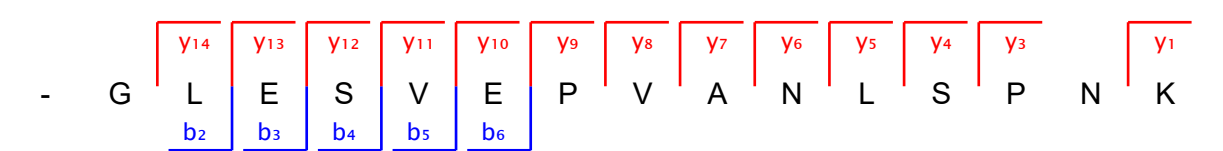

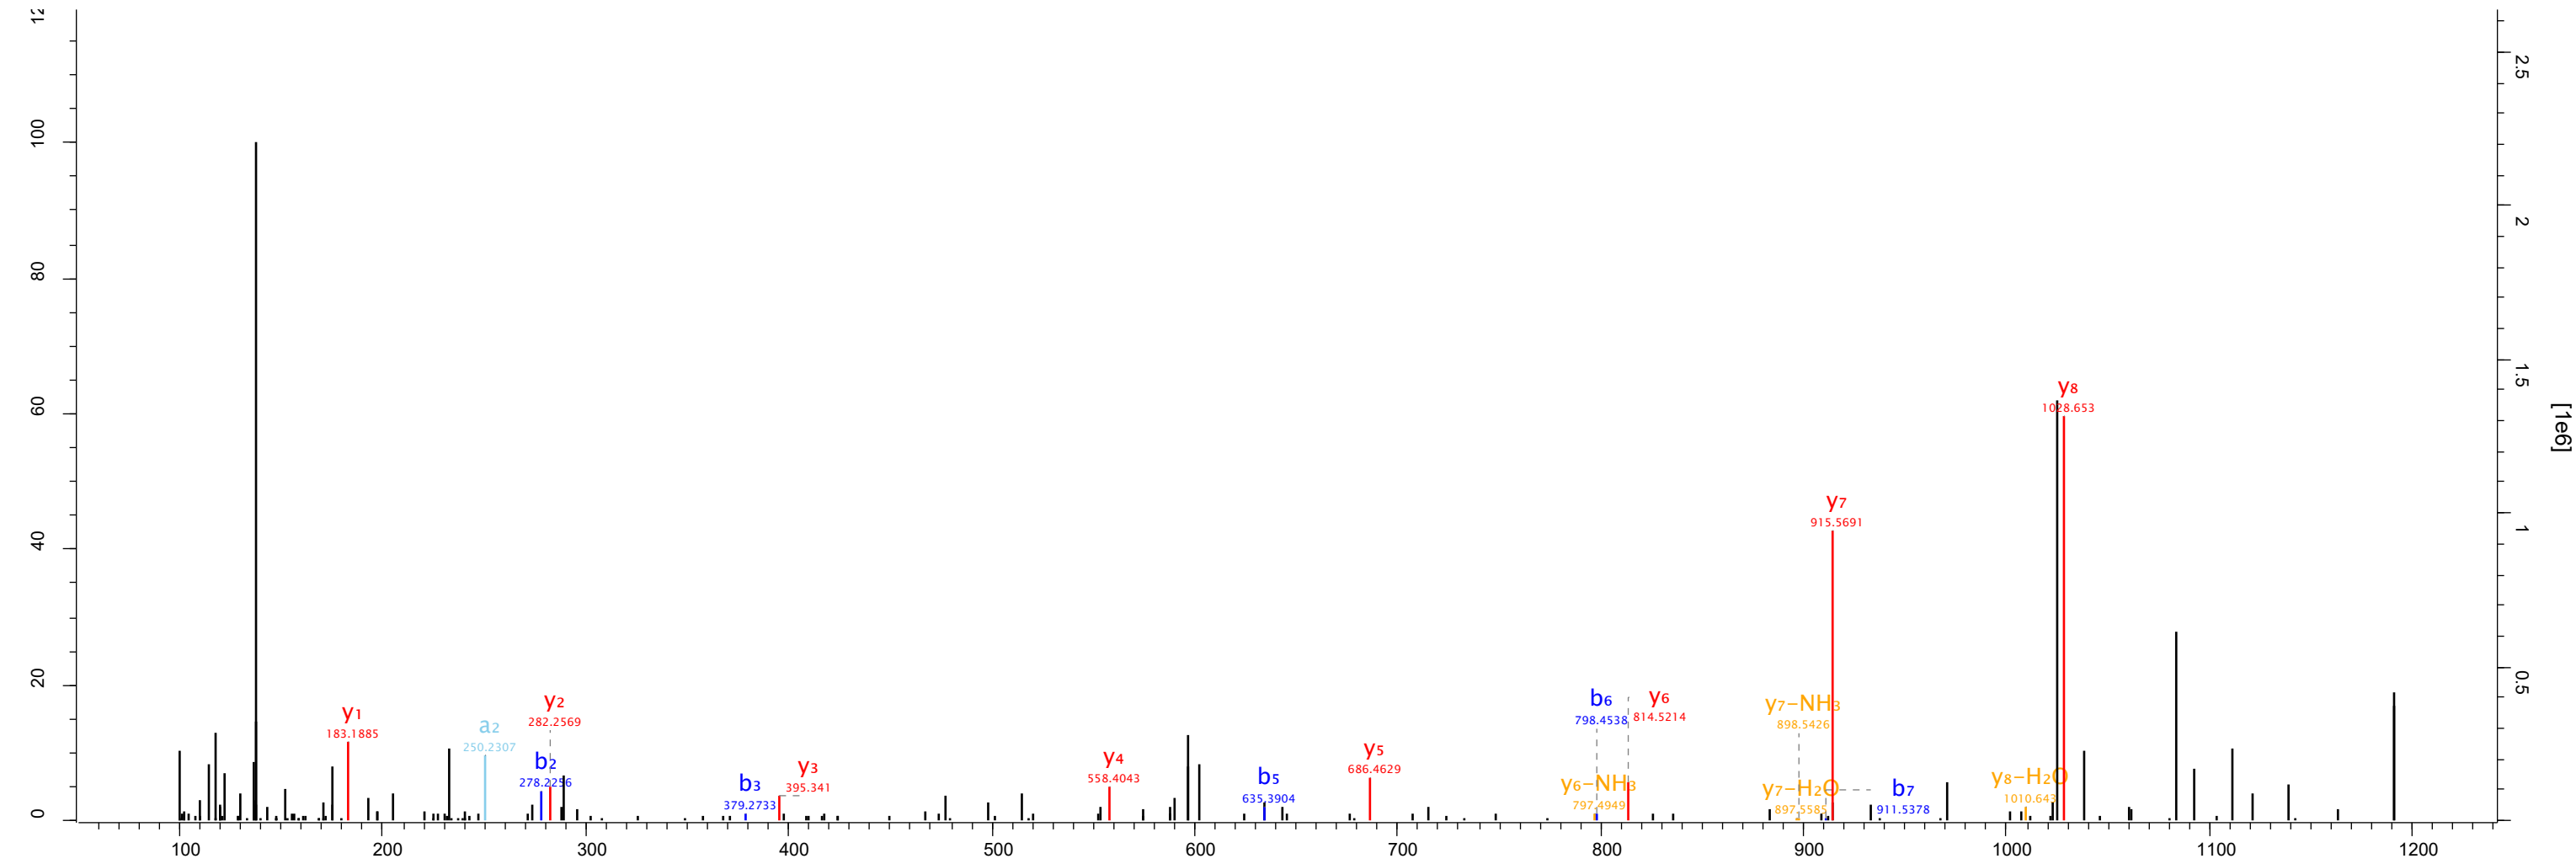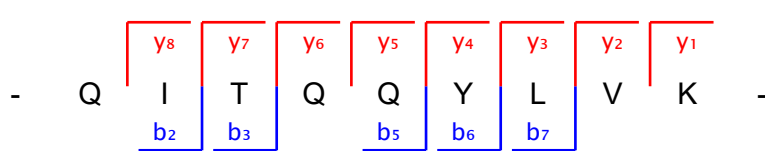



Raw file

Scan 27438 Method FTMS; HCD Score 46.73 m/z 654.35

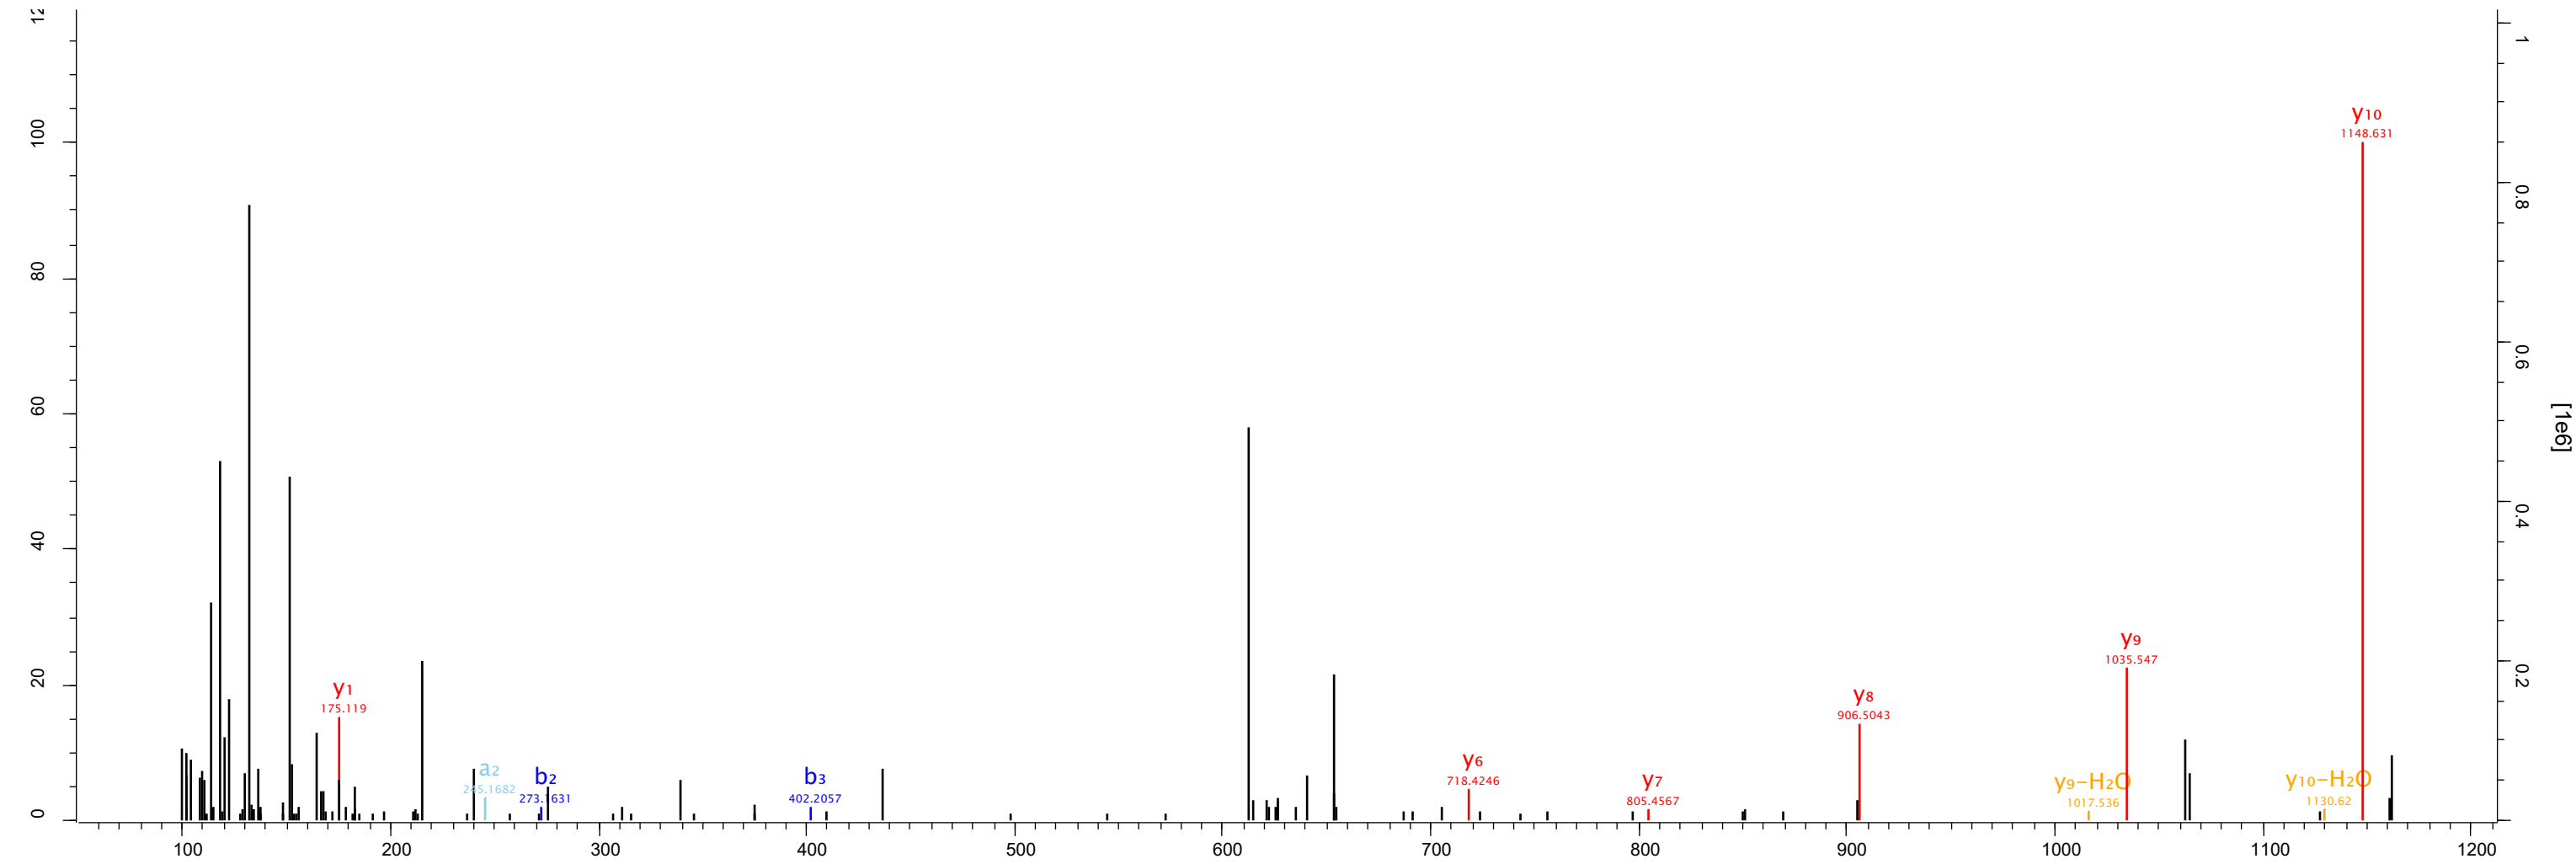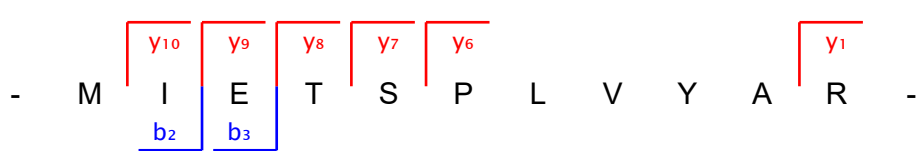

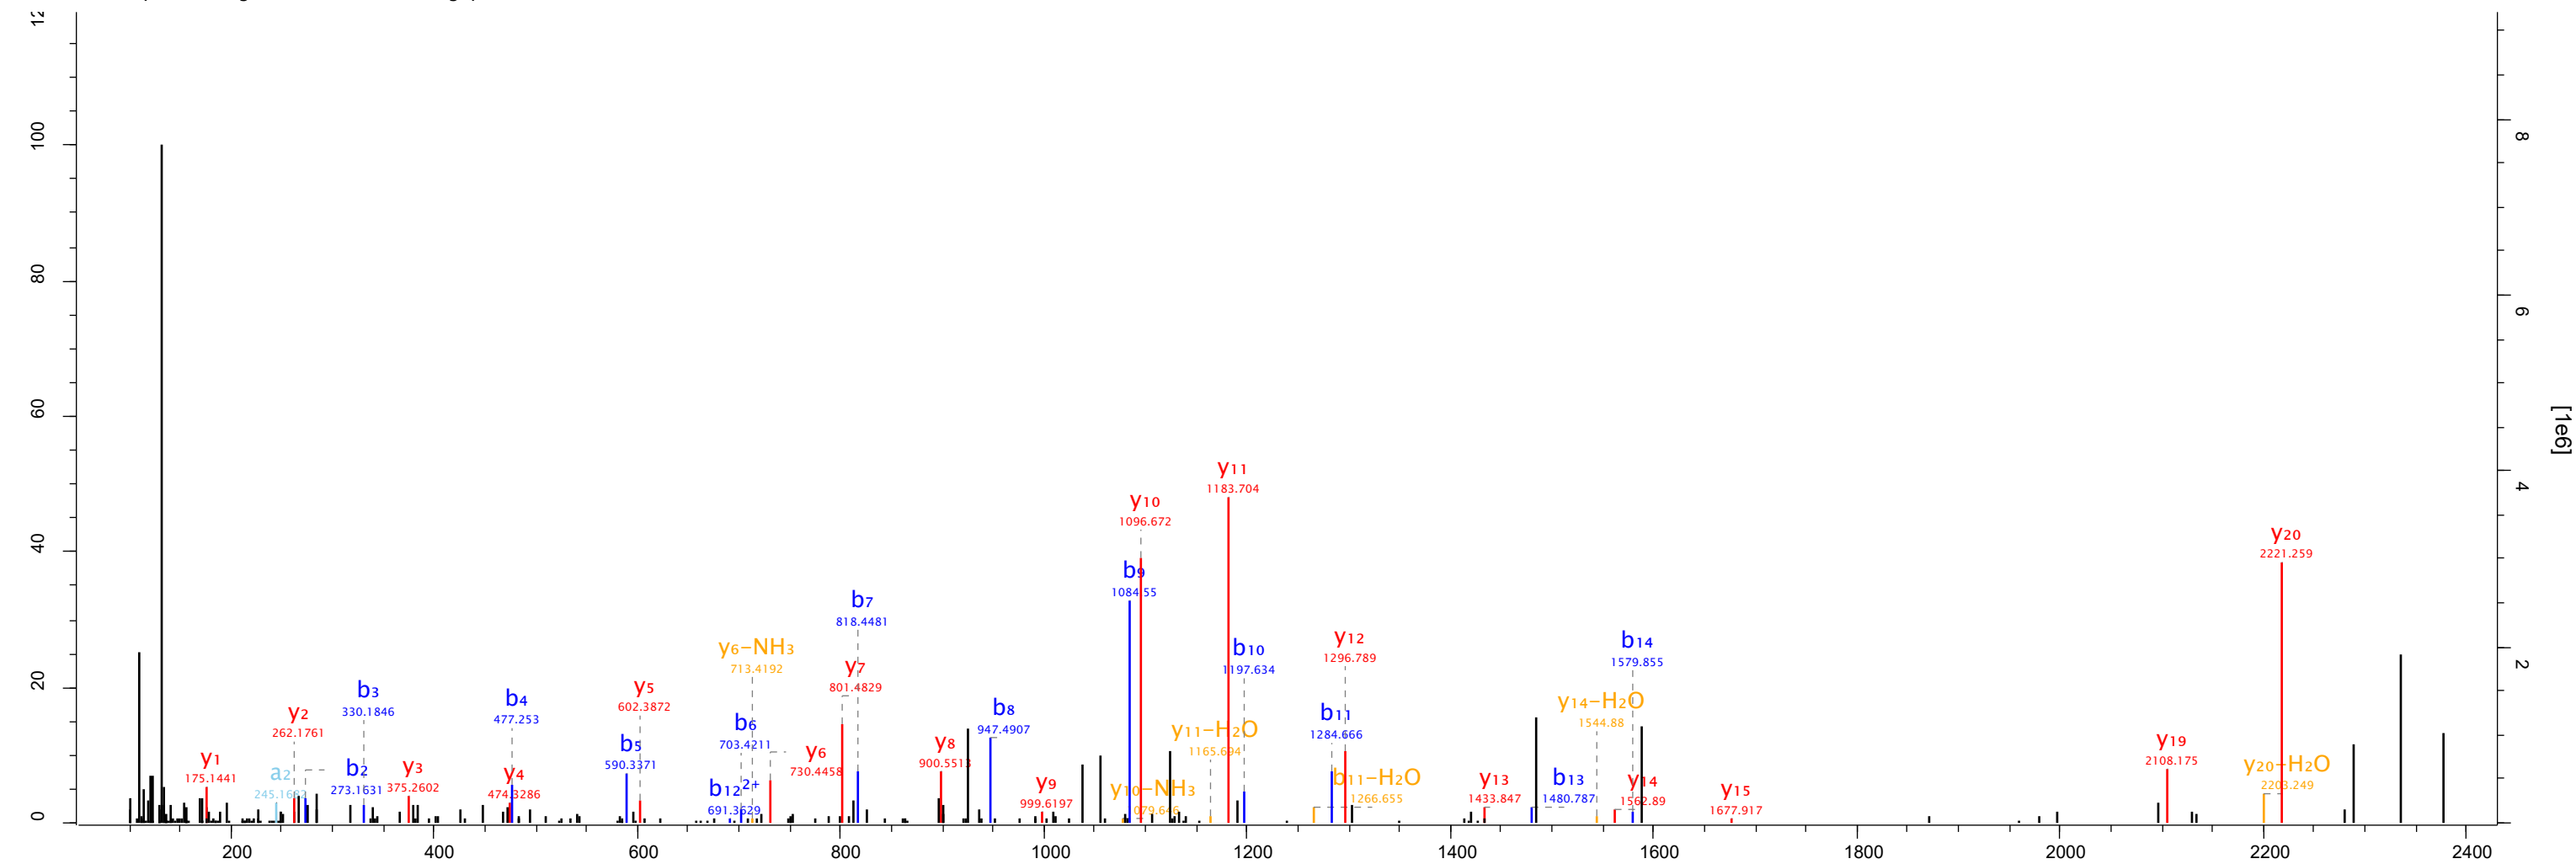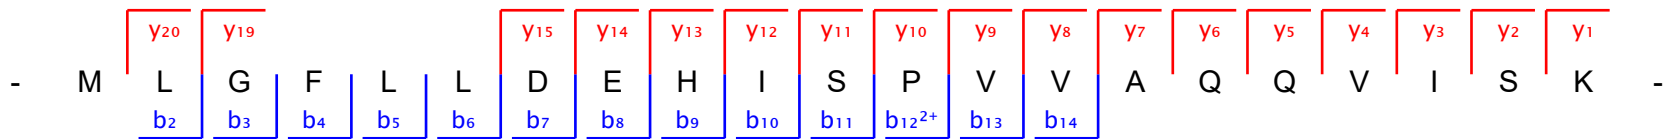

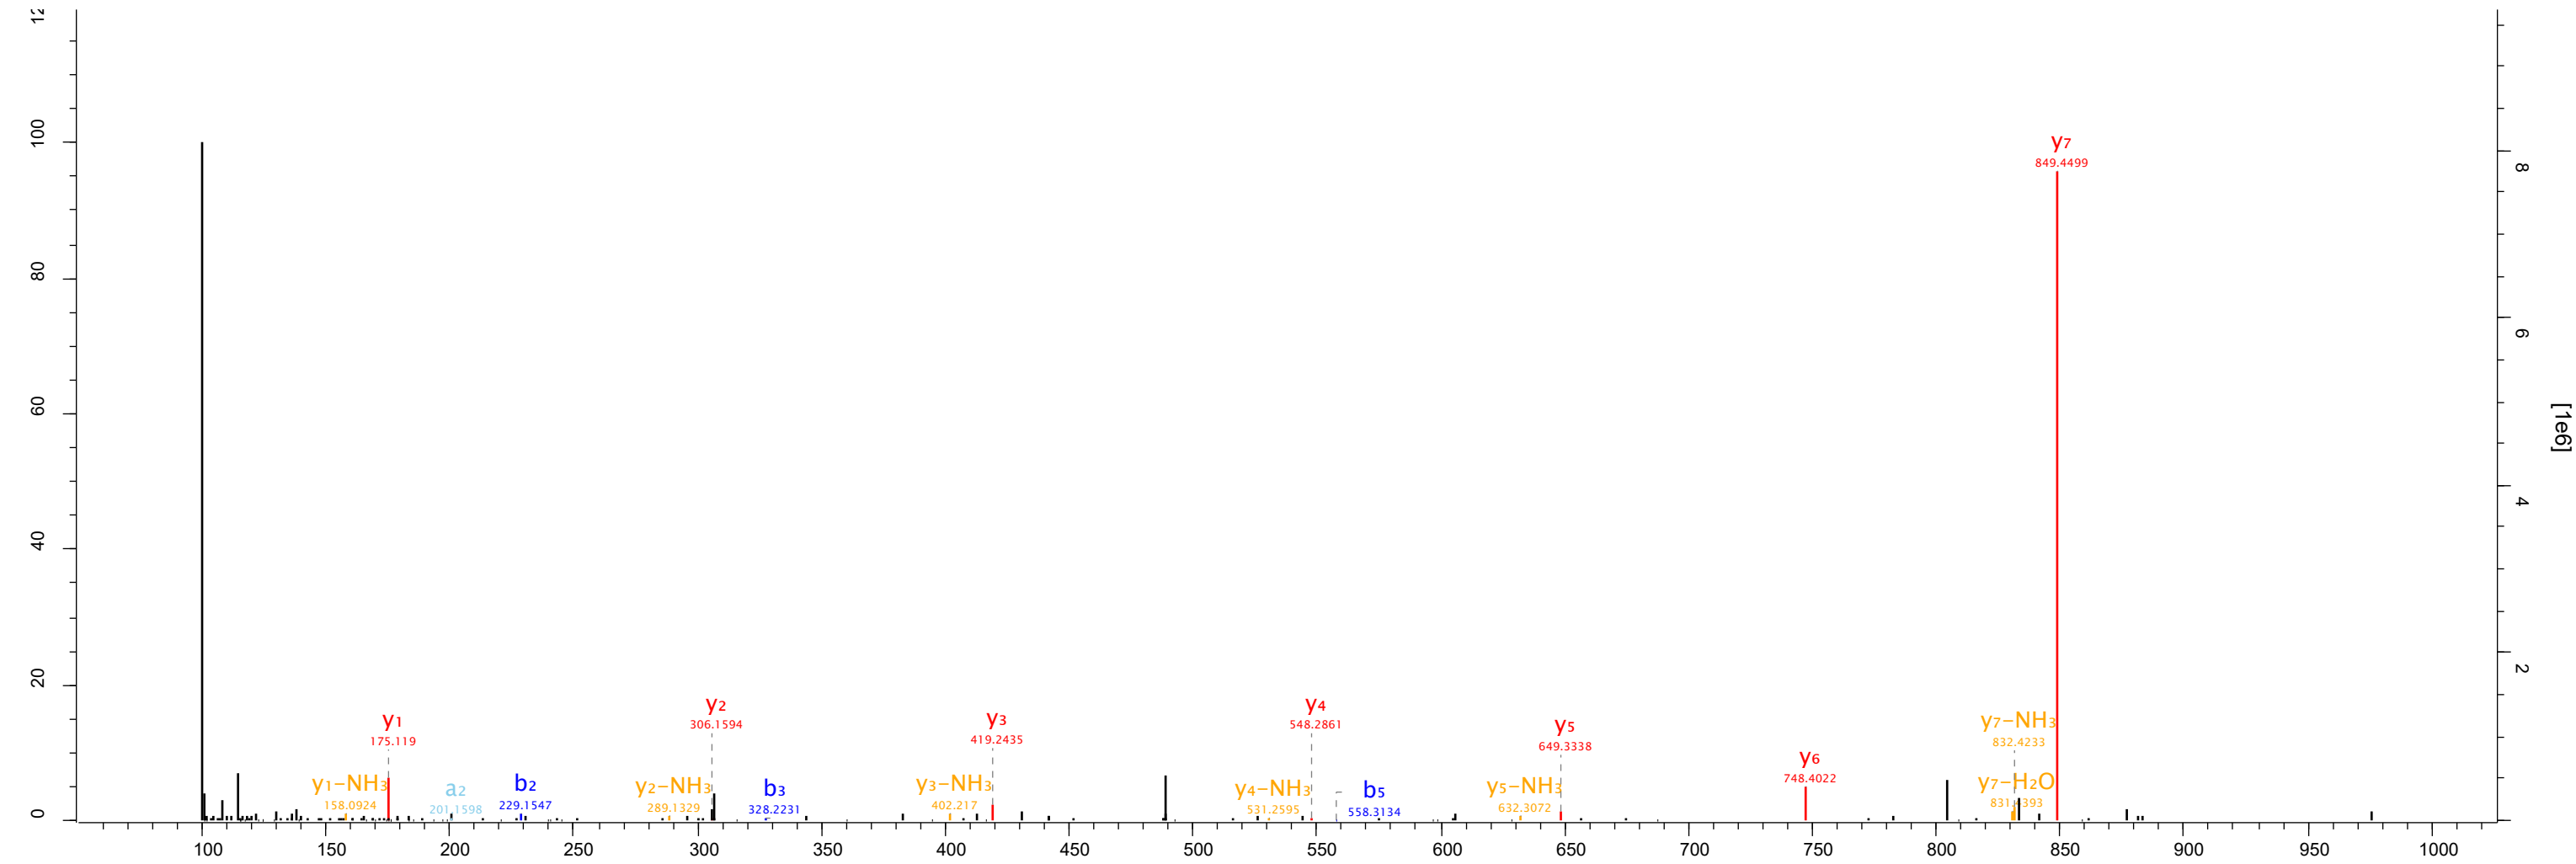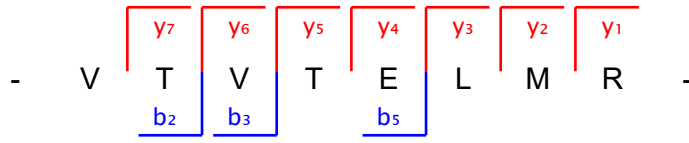

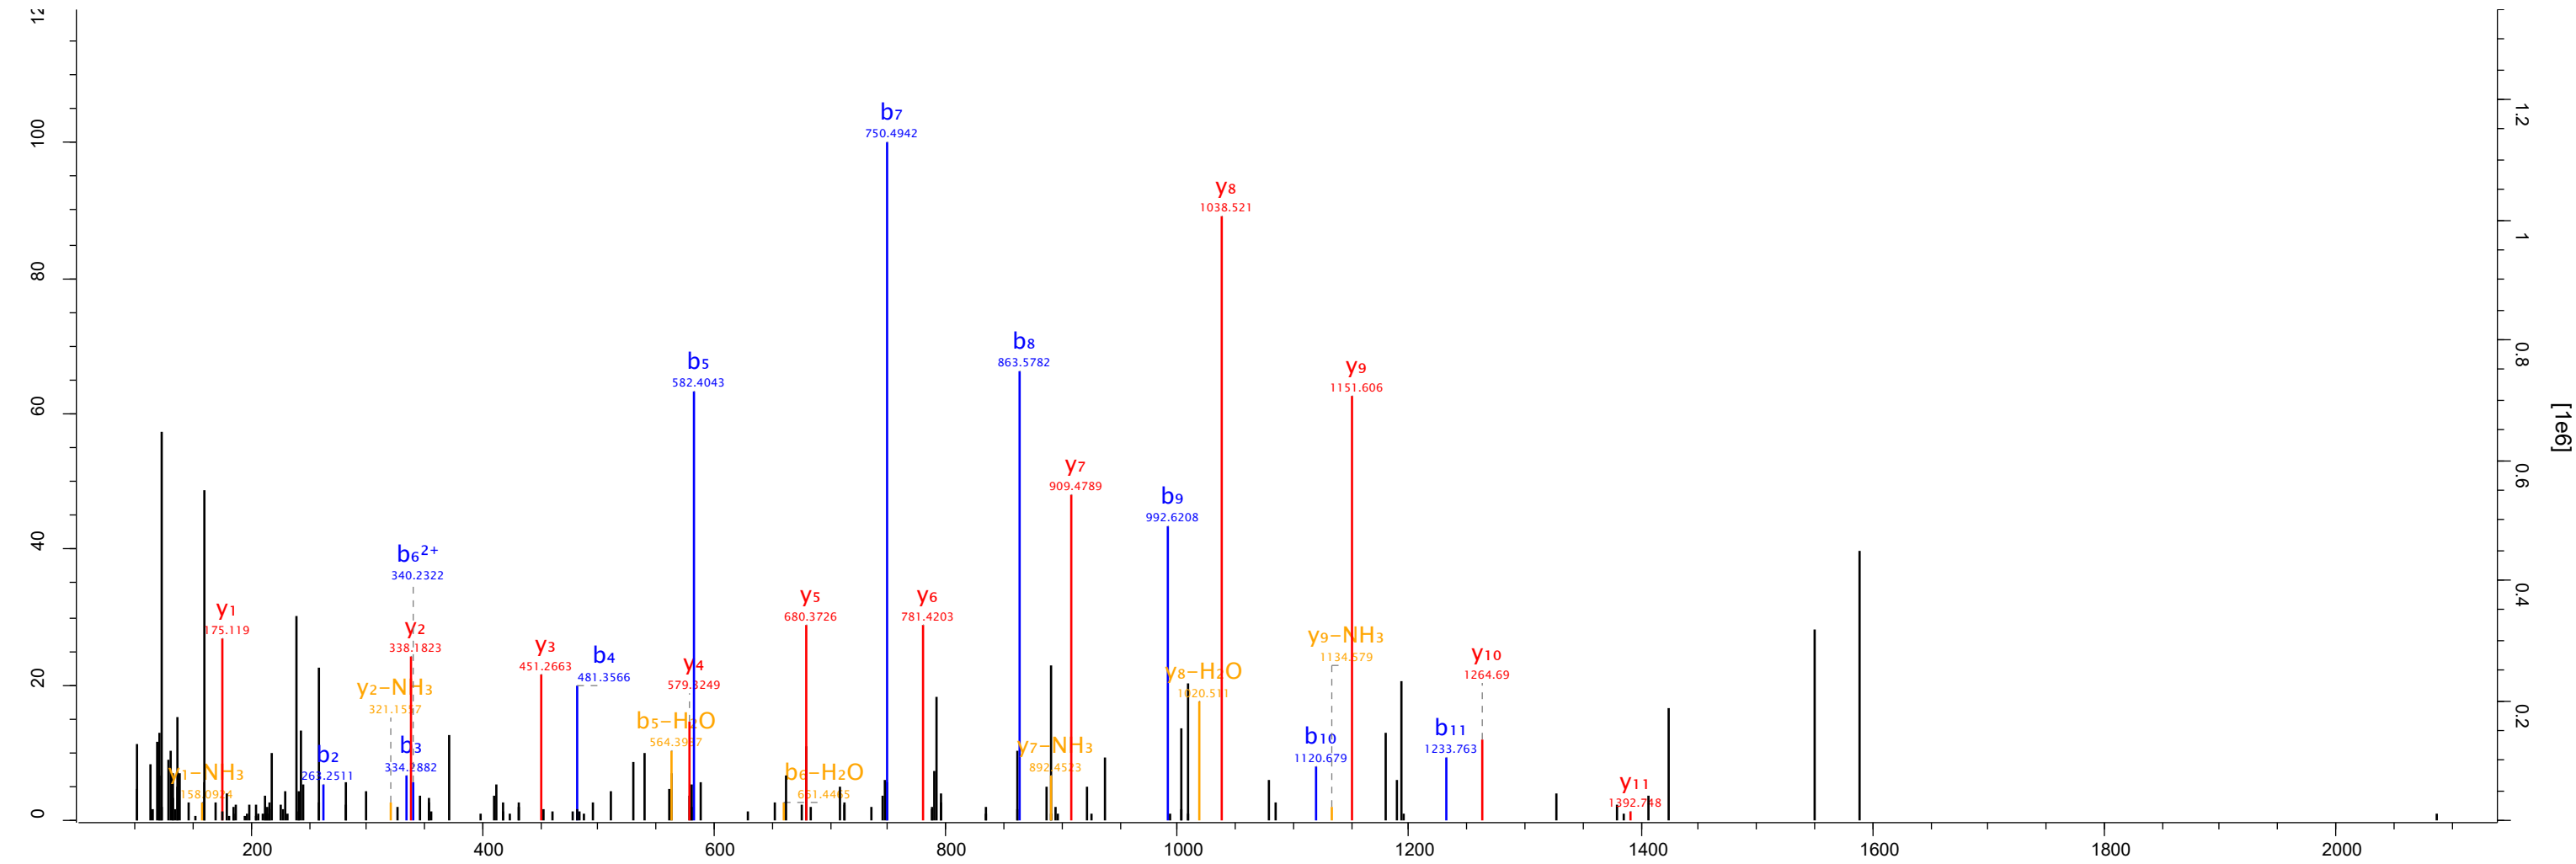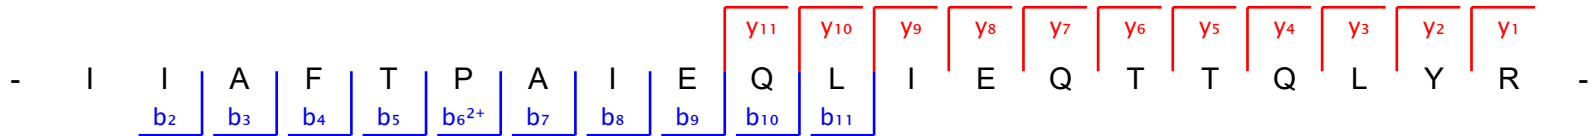

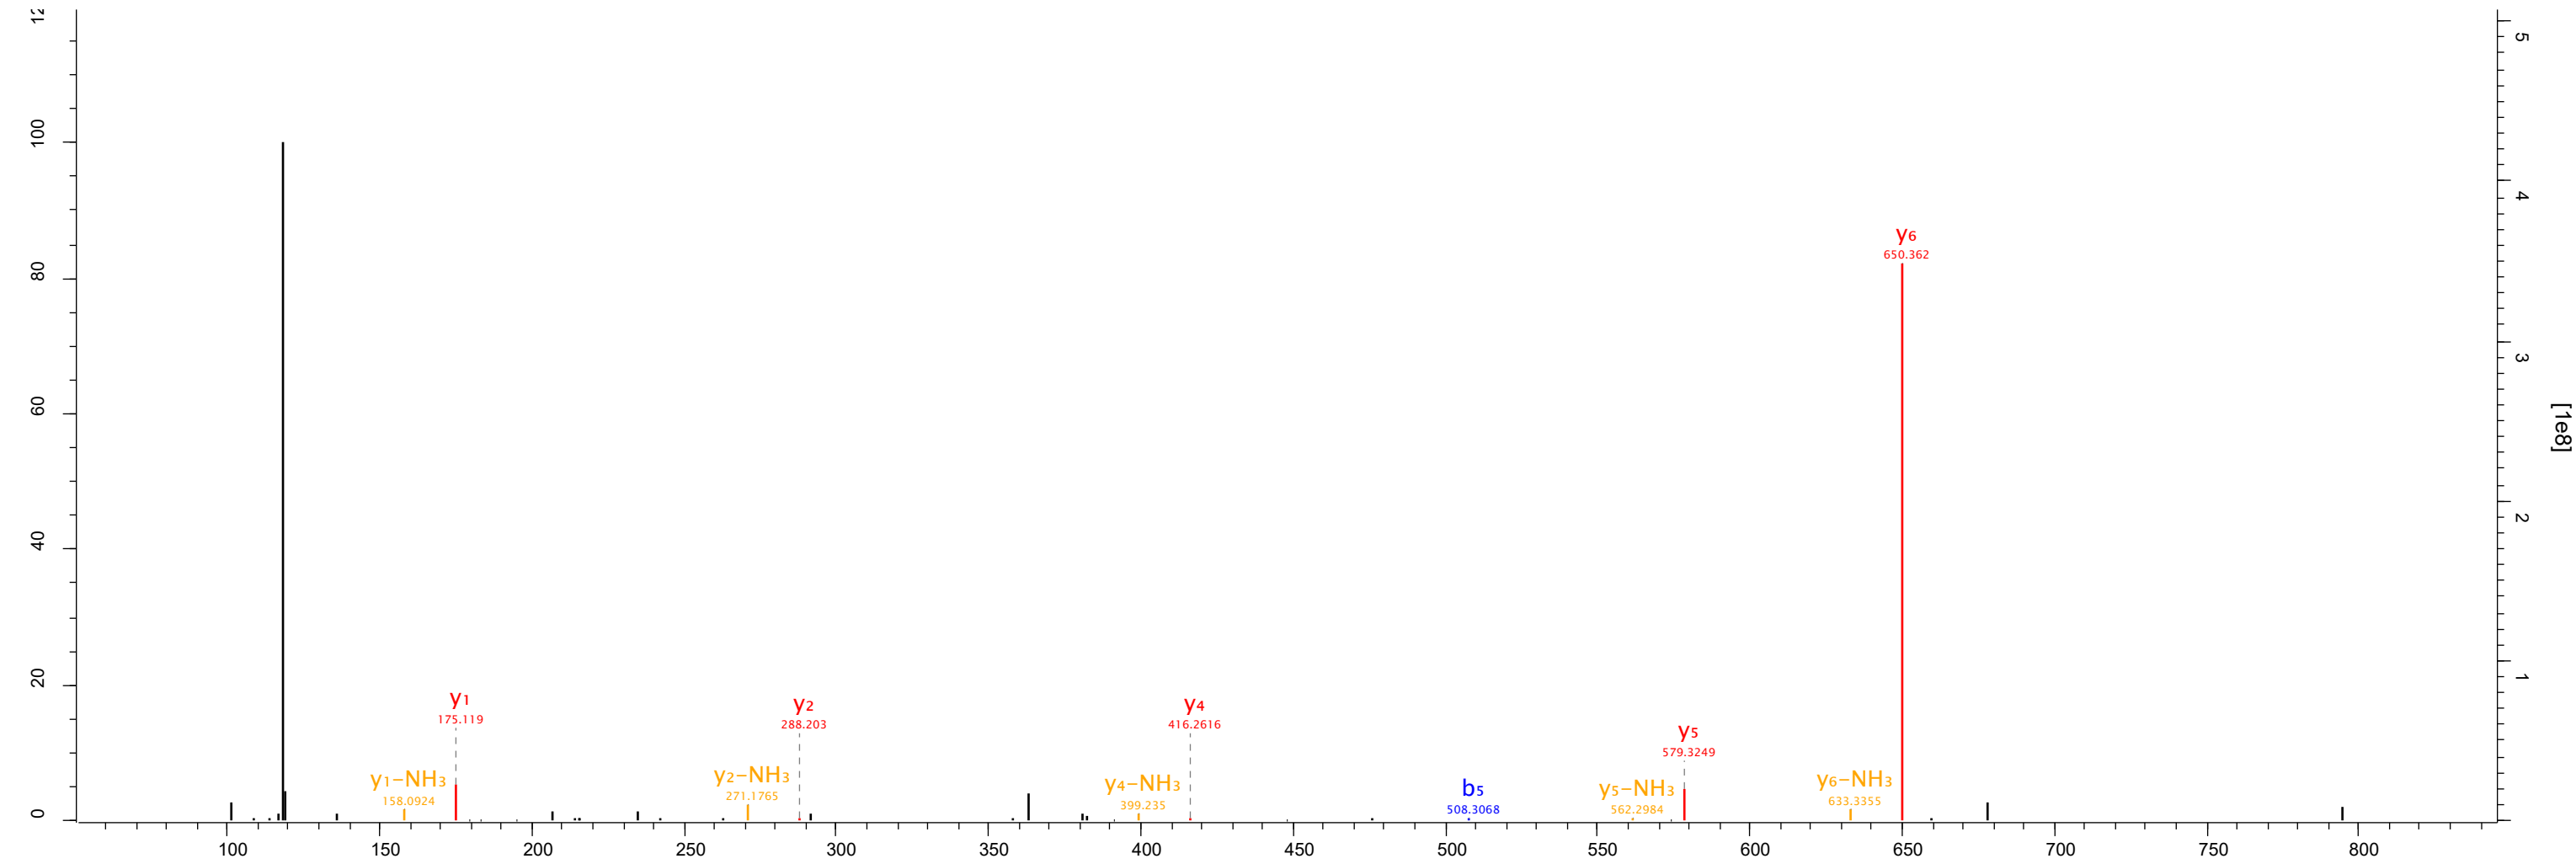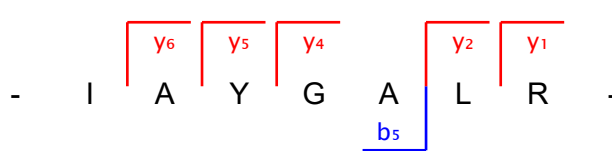

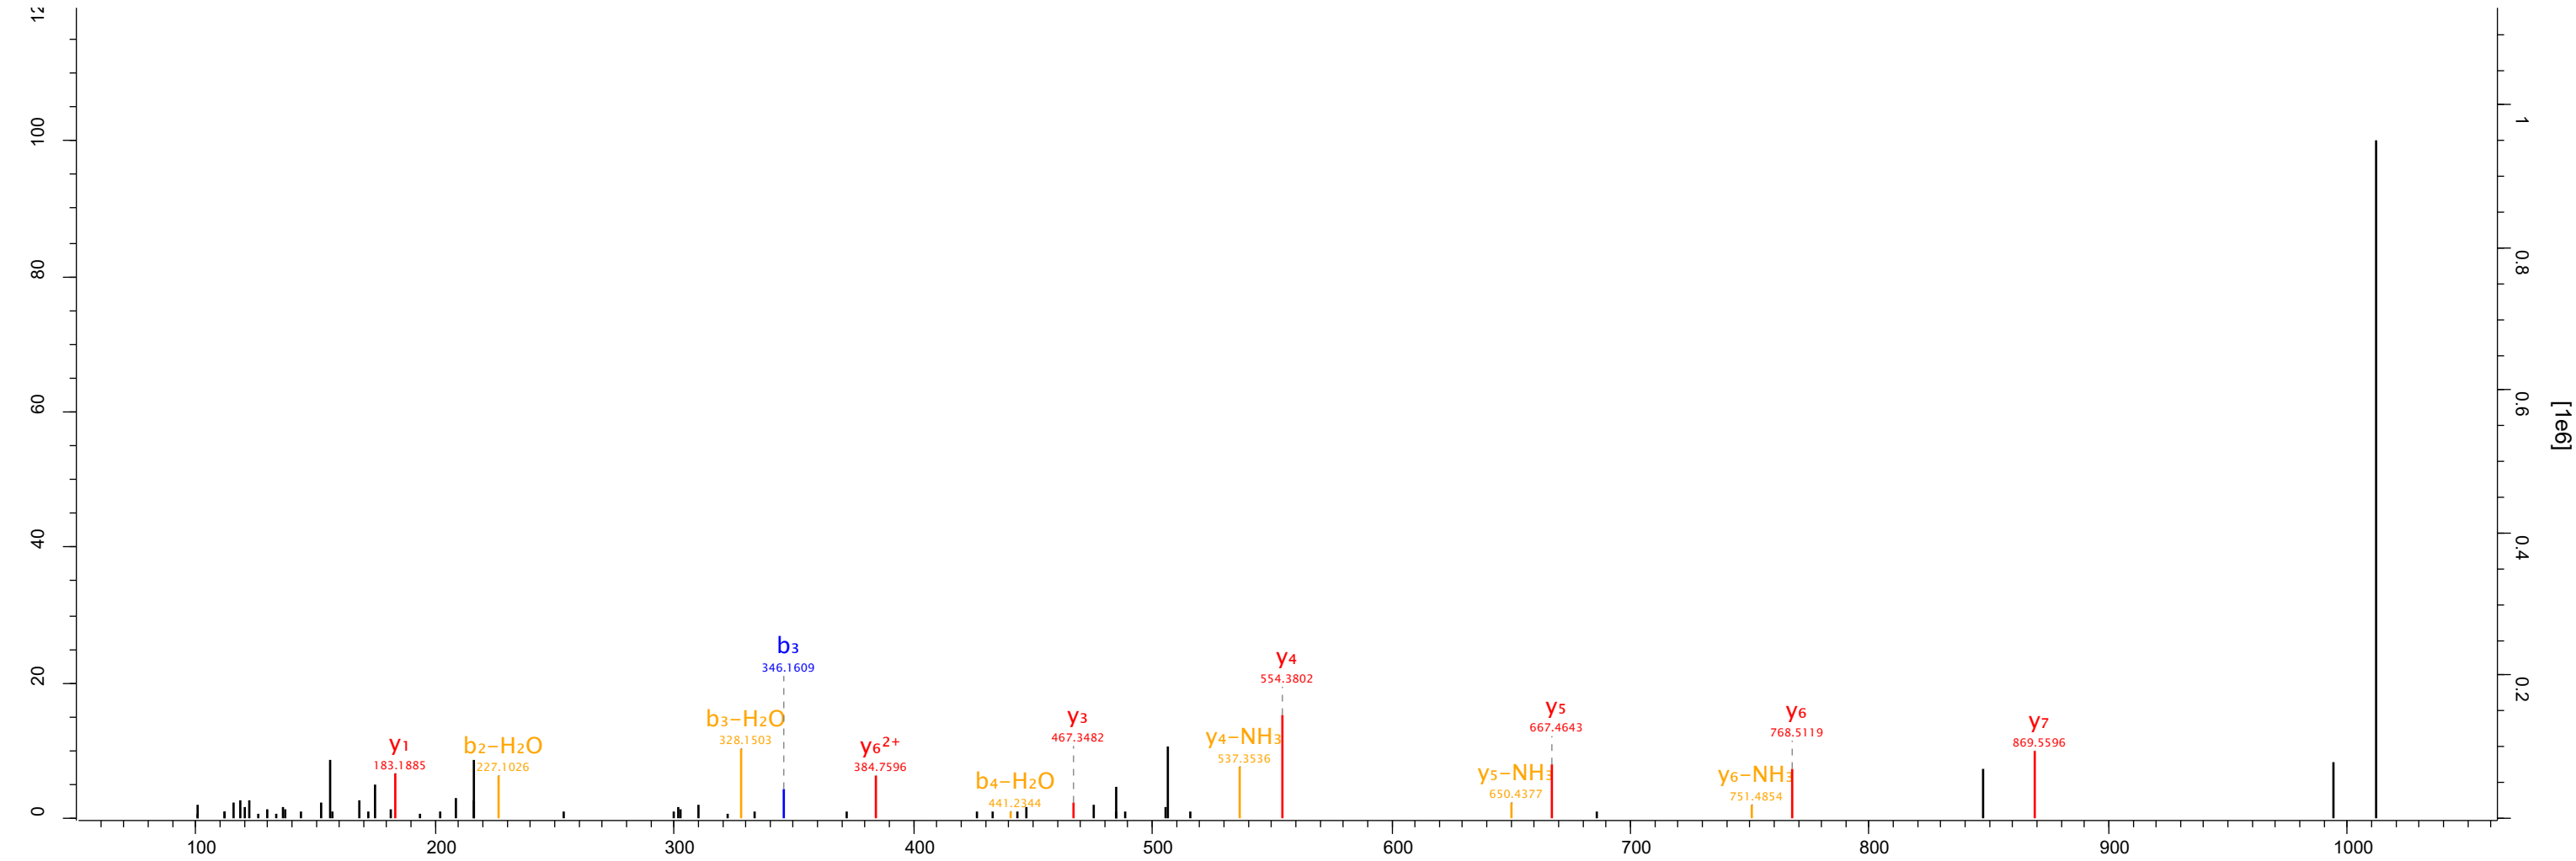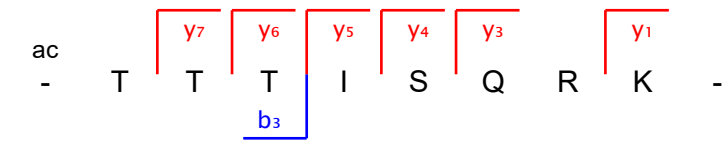

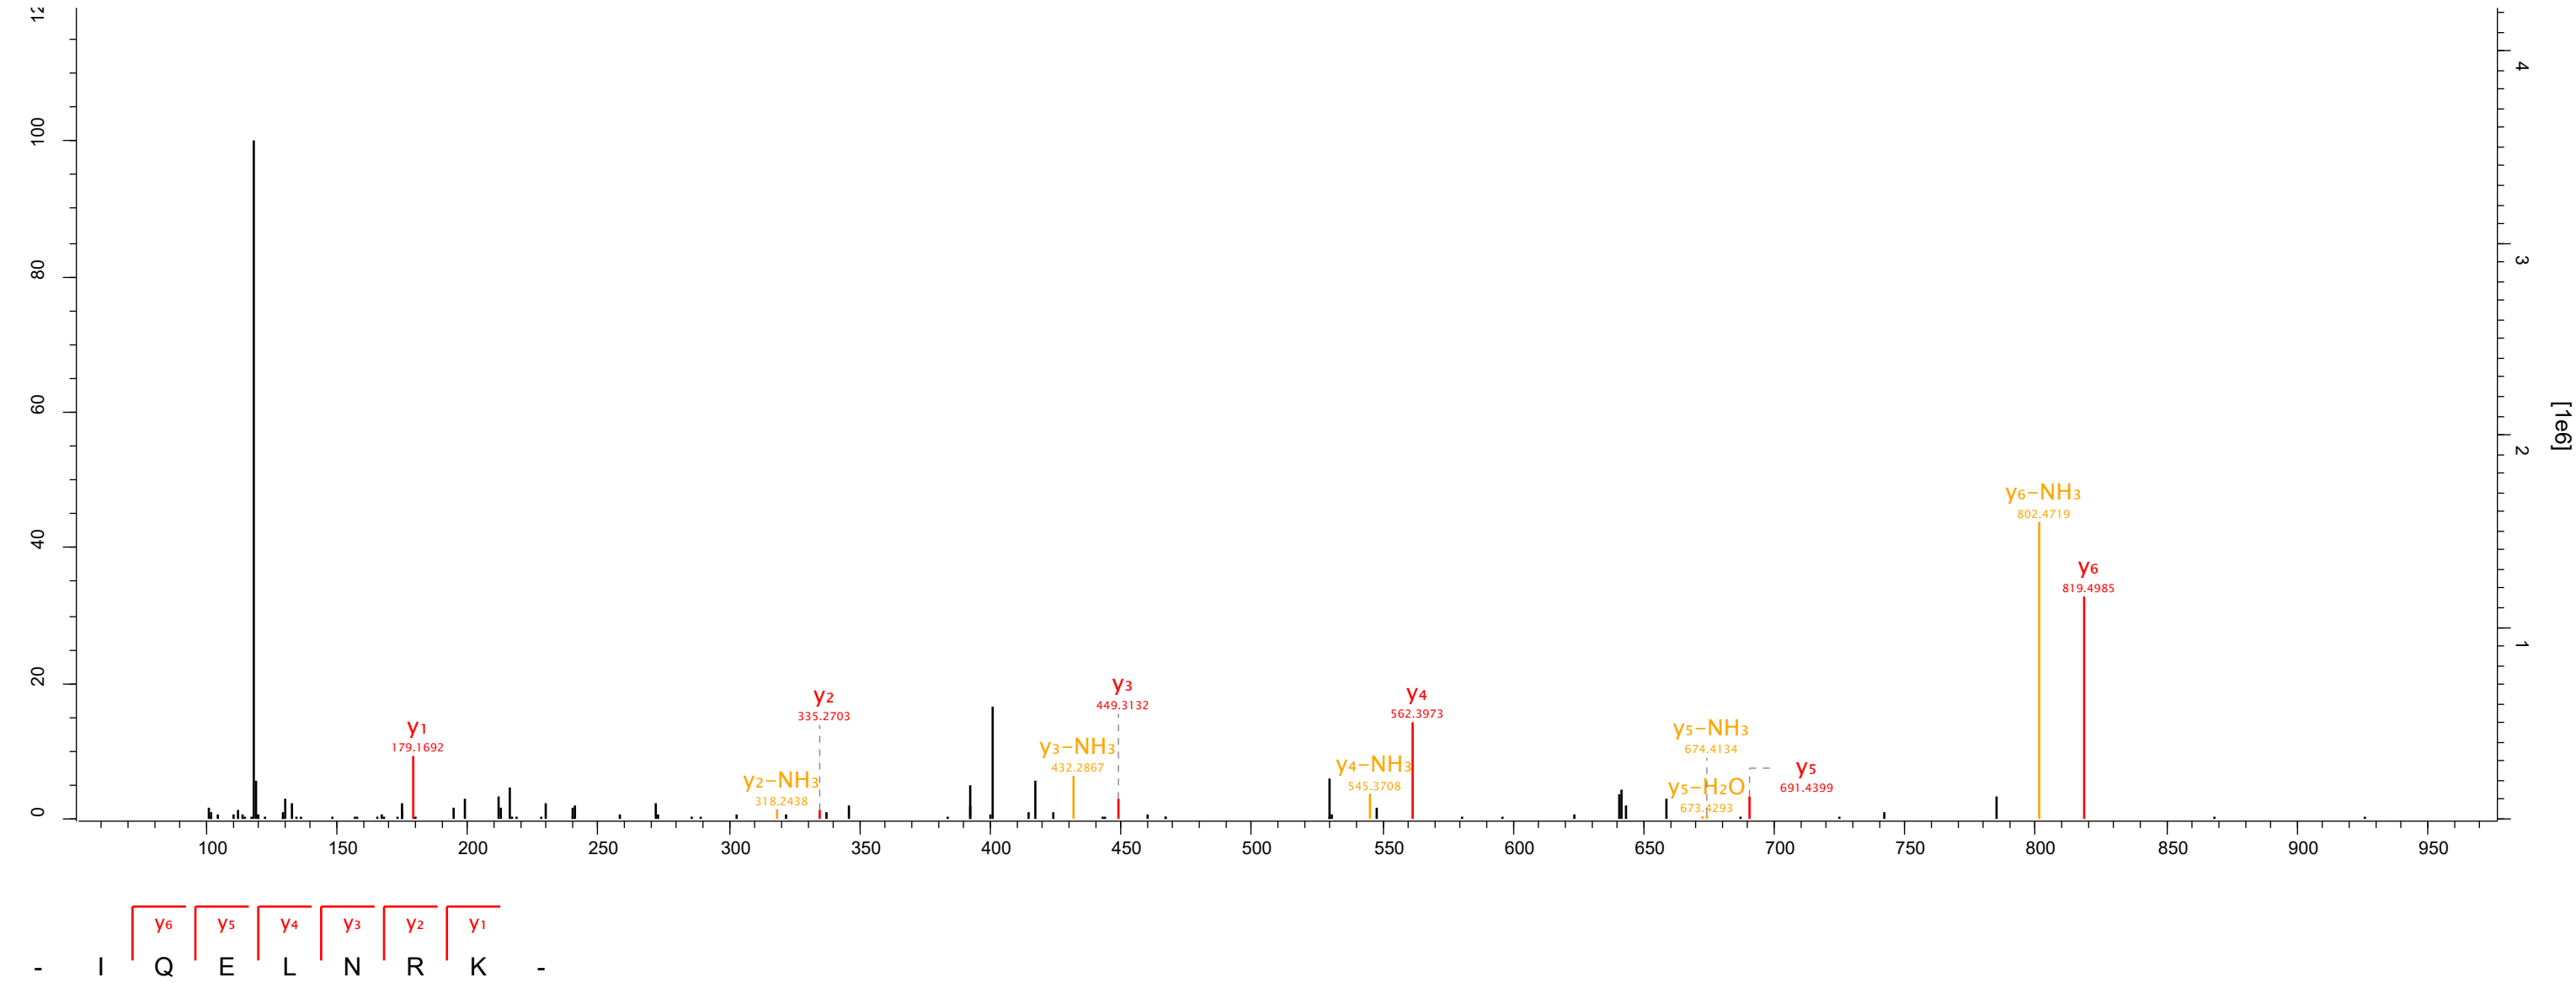

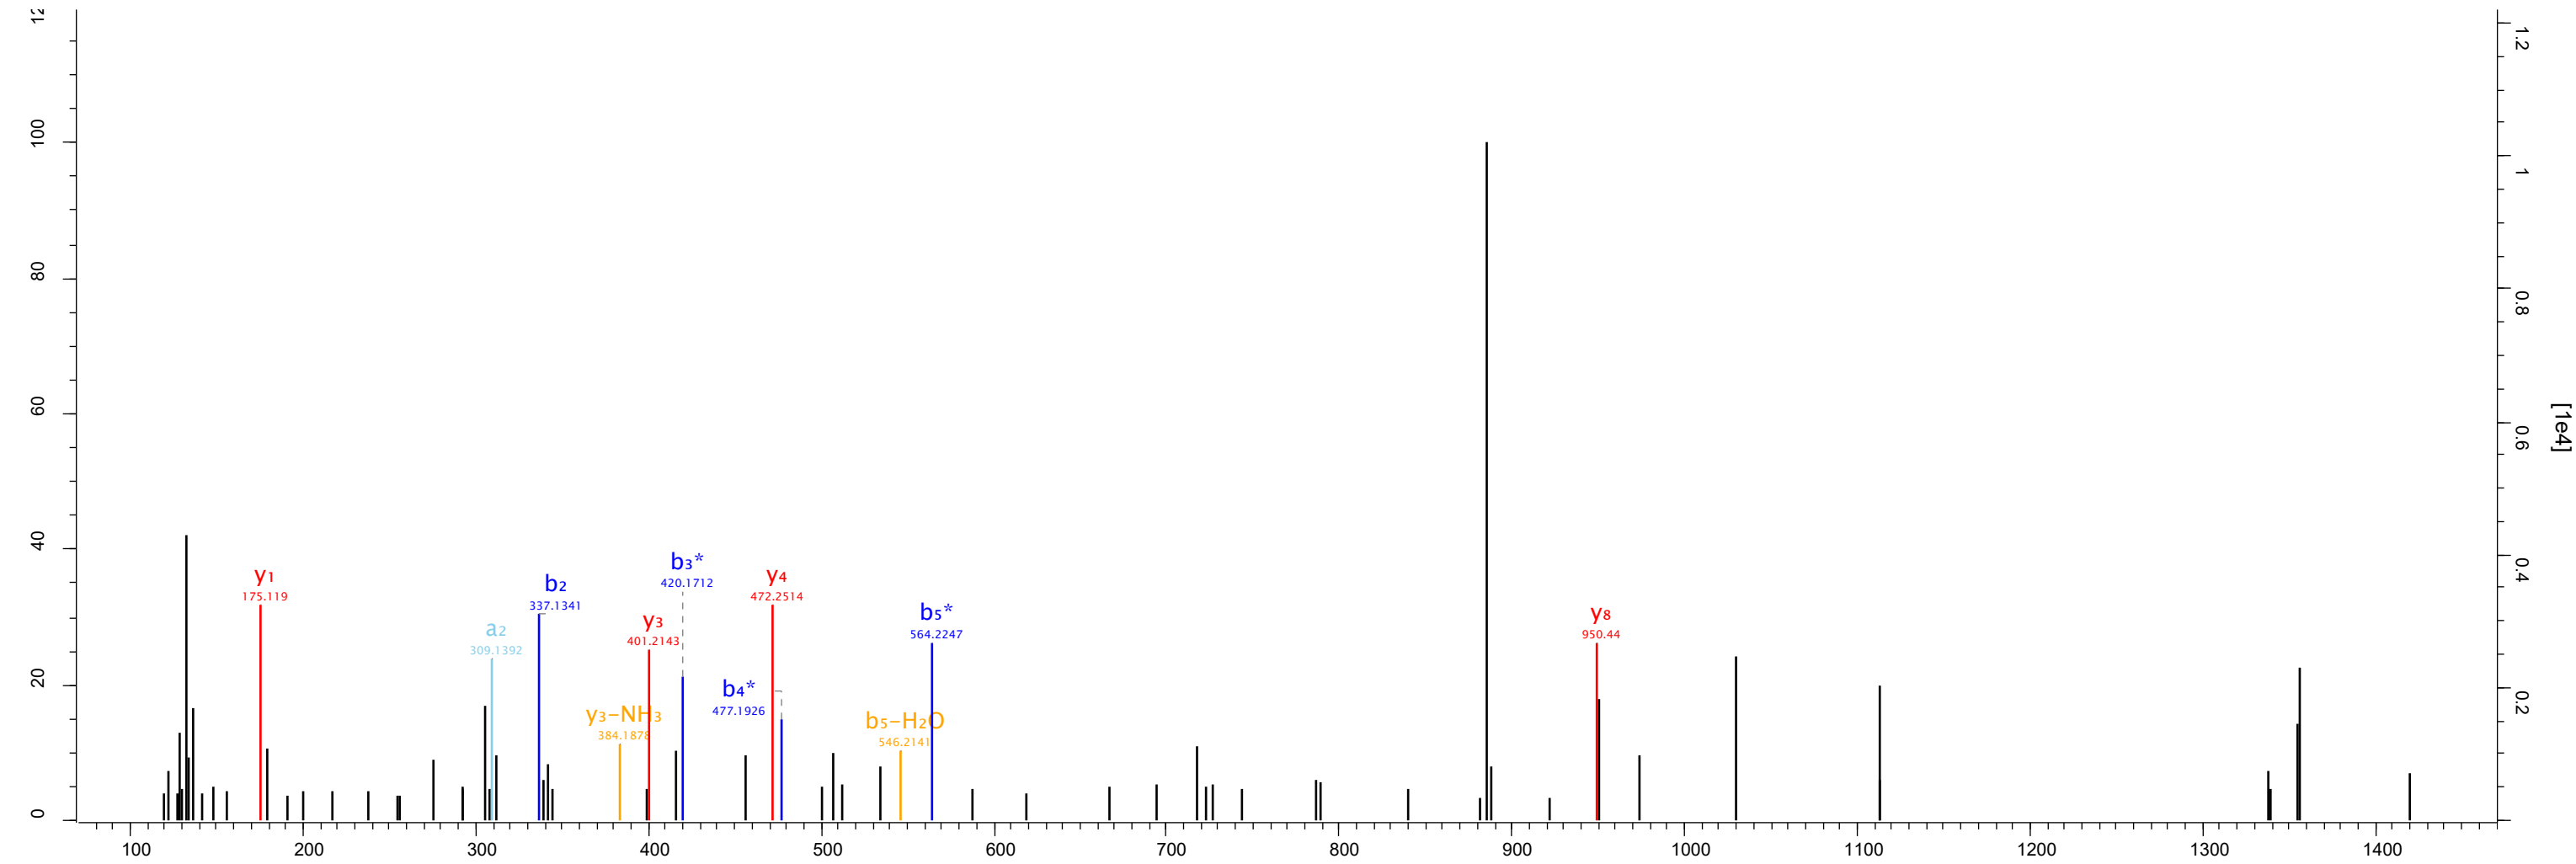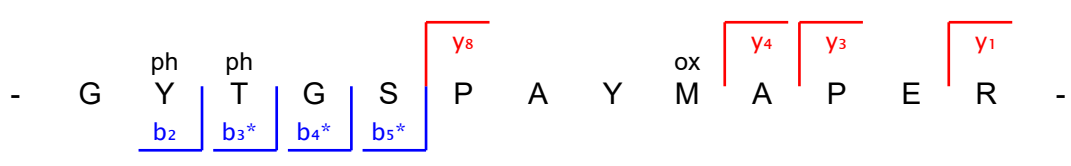



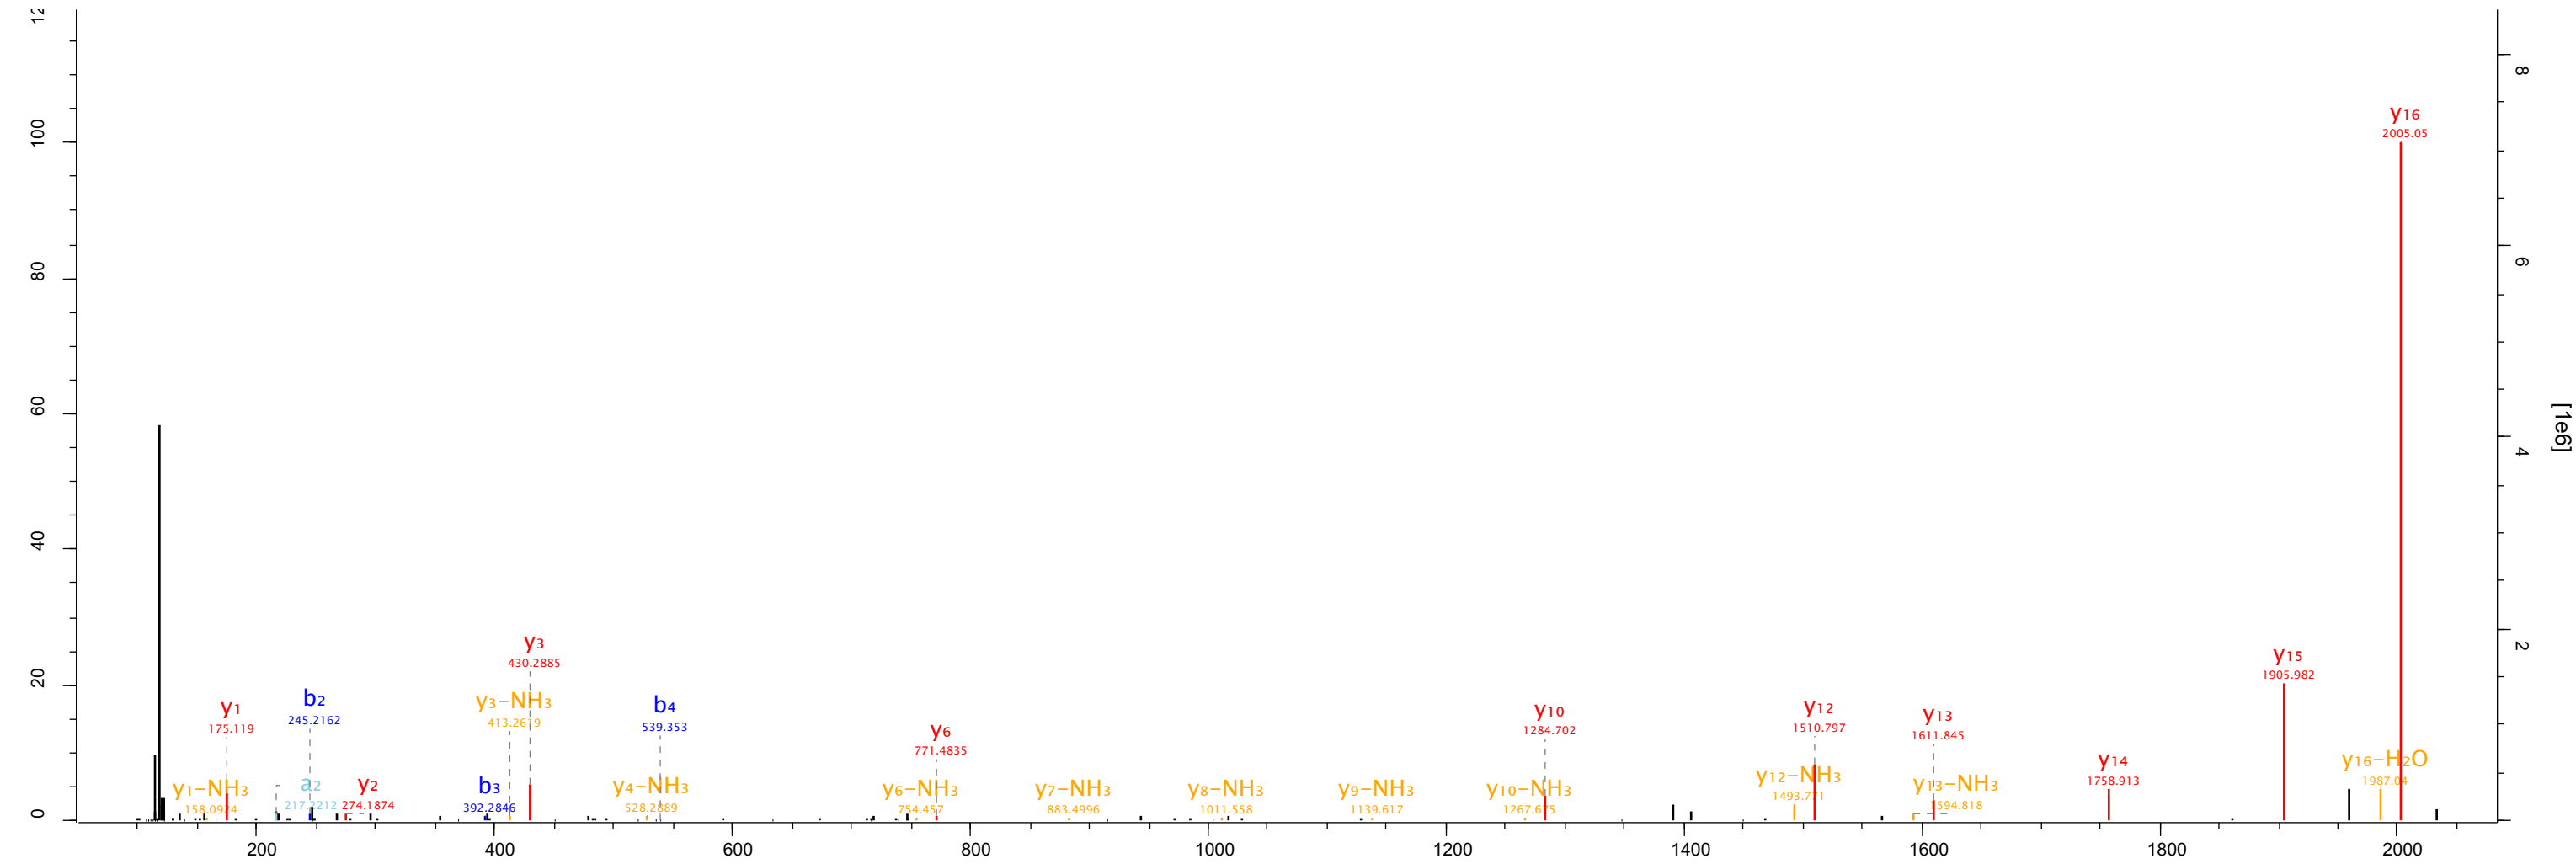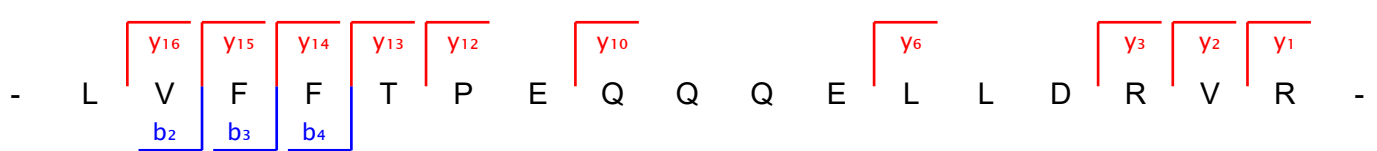

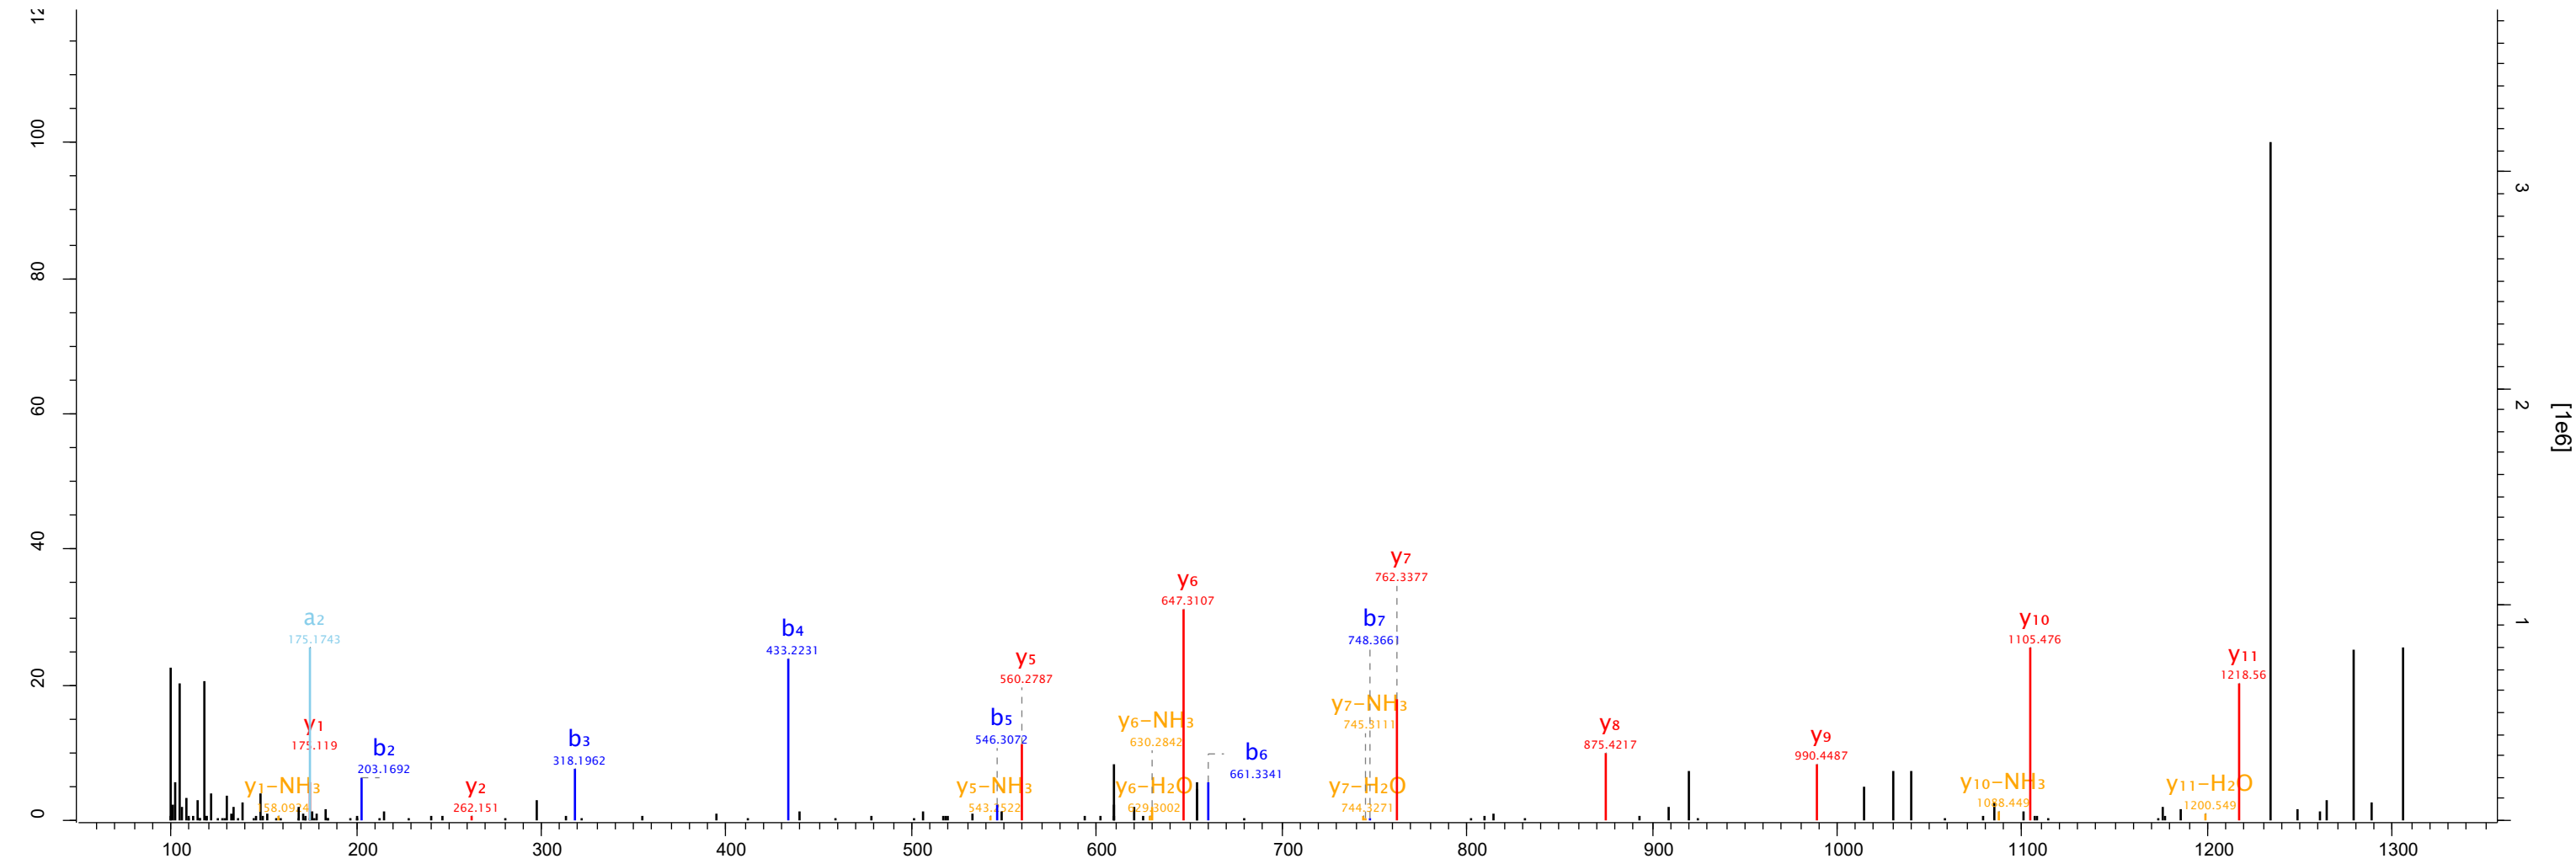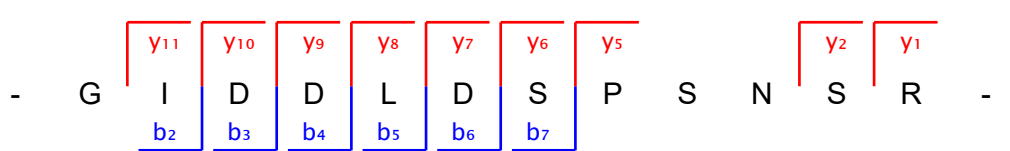

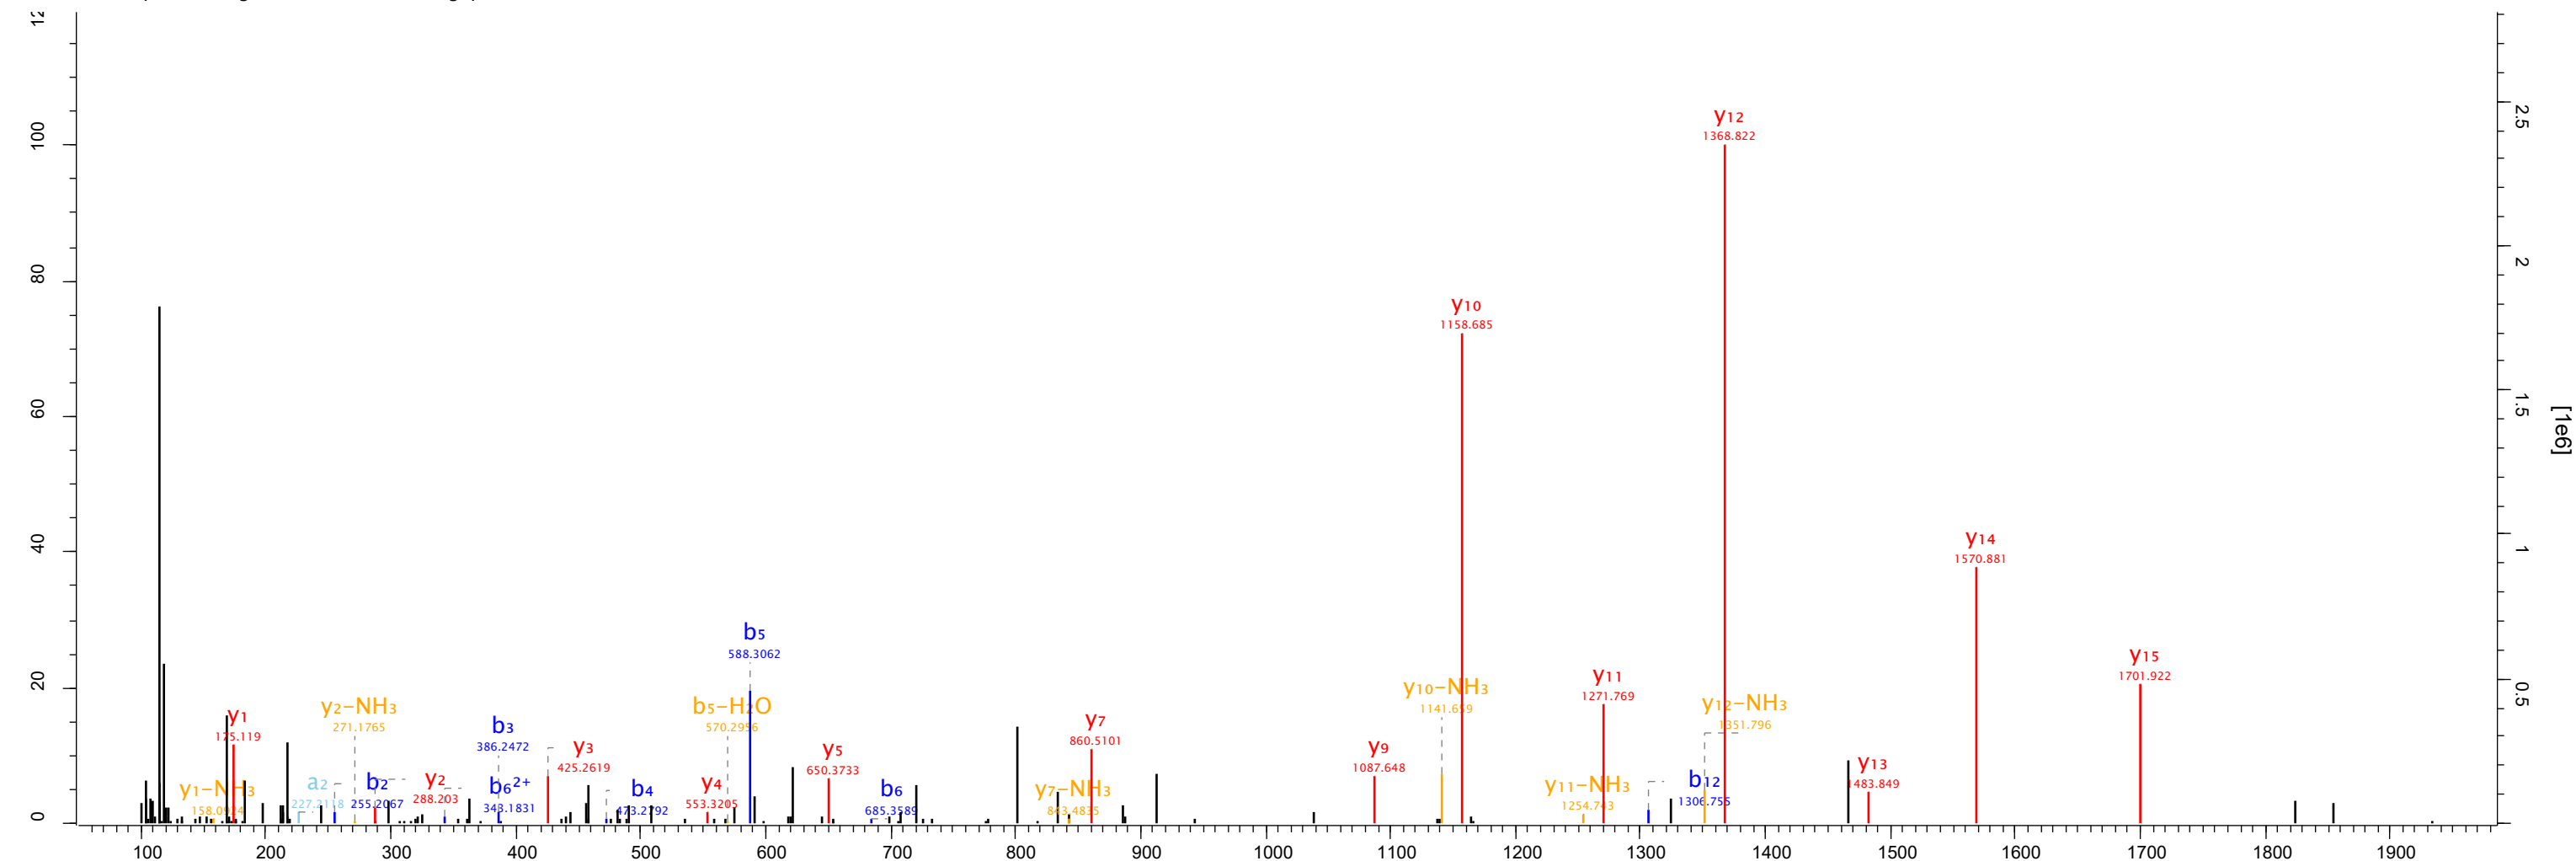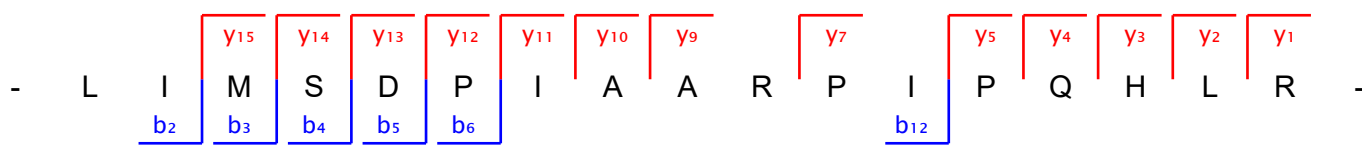

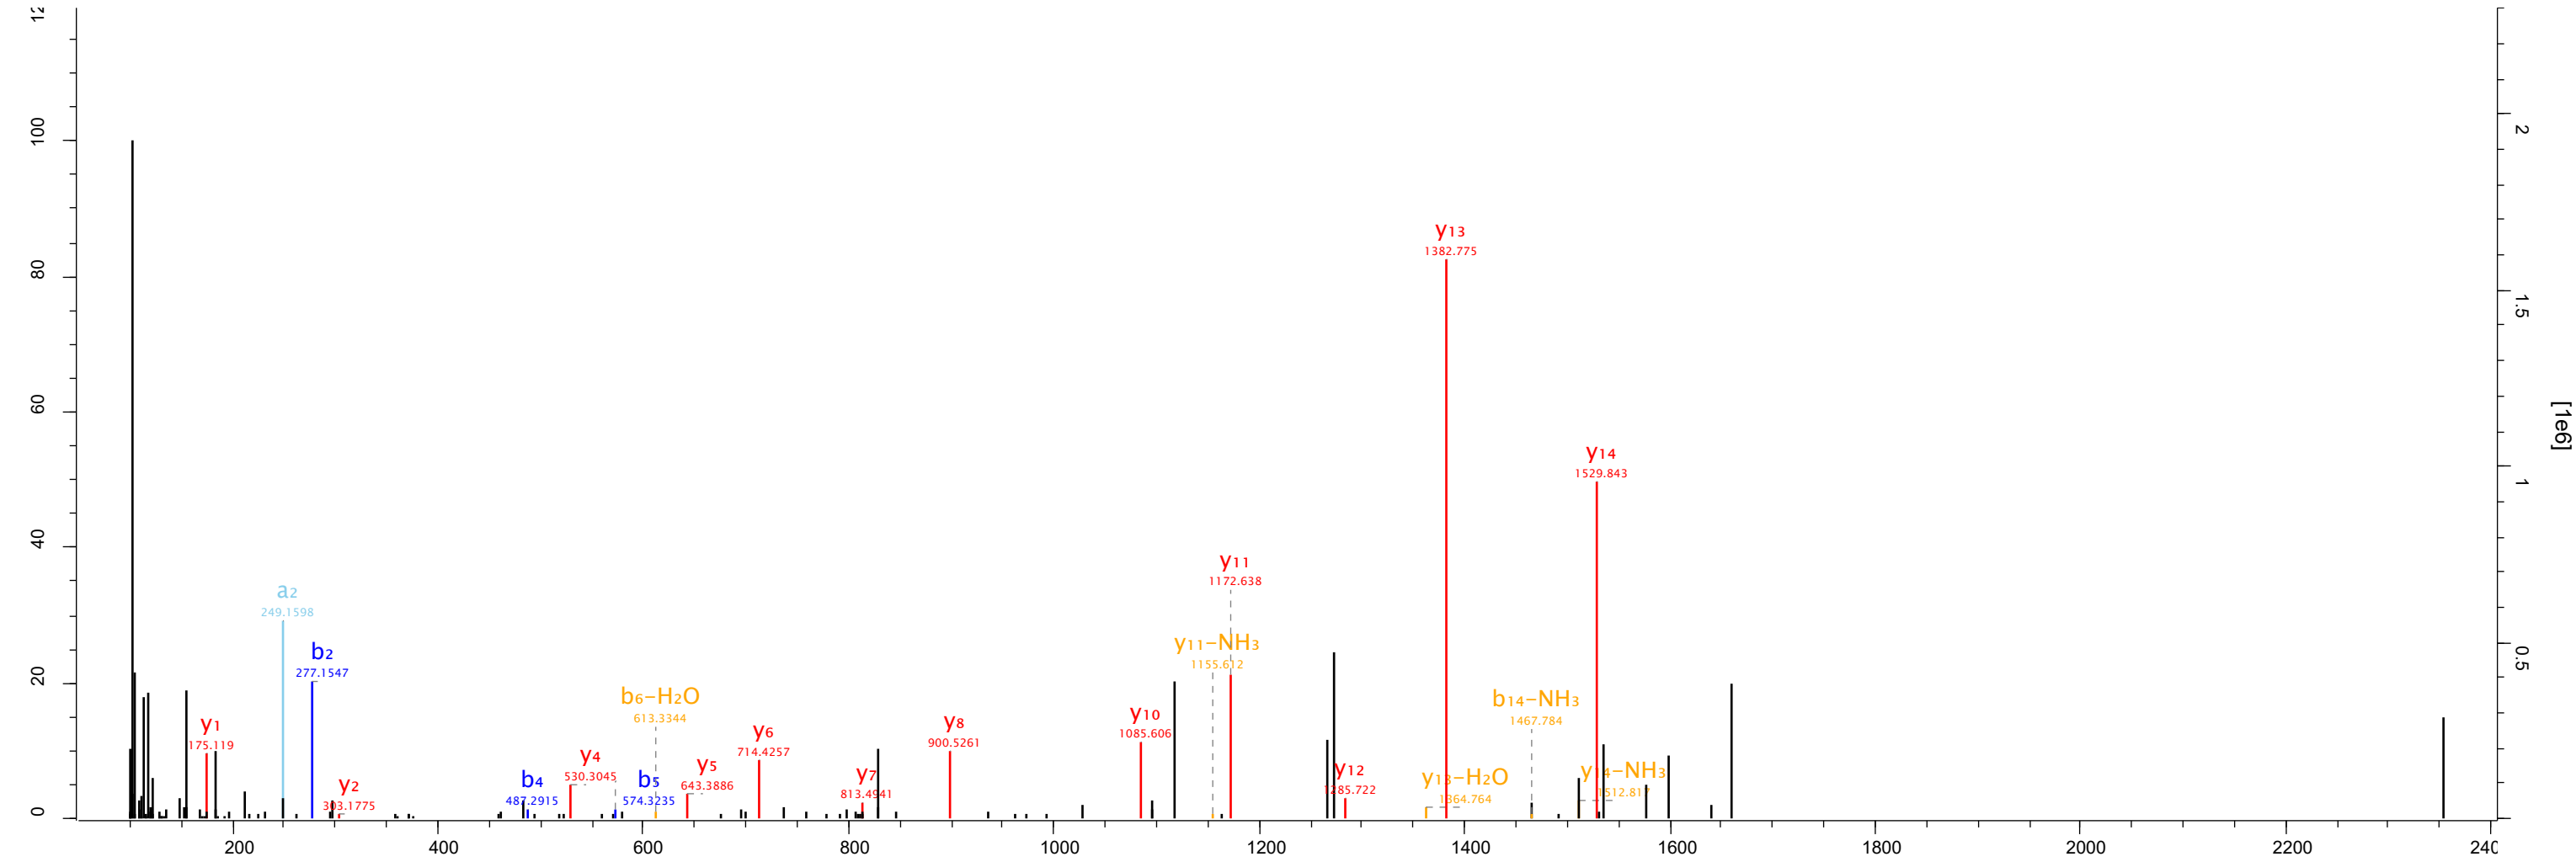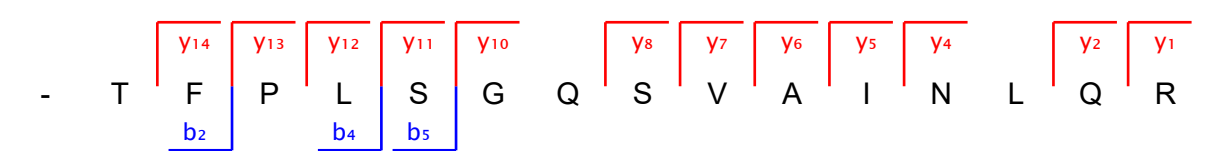

Raw file  
20160713\_PS\_Scystis\_dimethyl\_Mix2\_8\_55\_fract6  
Scan 5424 Method FTMS; HCD Score 44.51 m/z 533.28

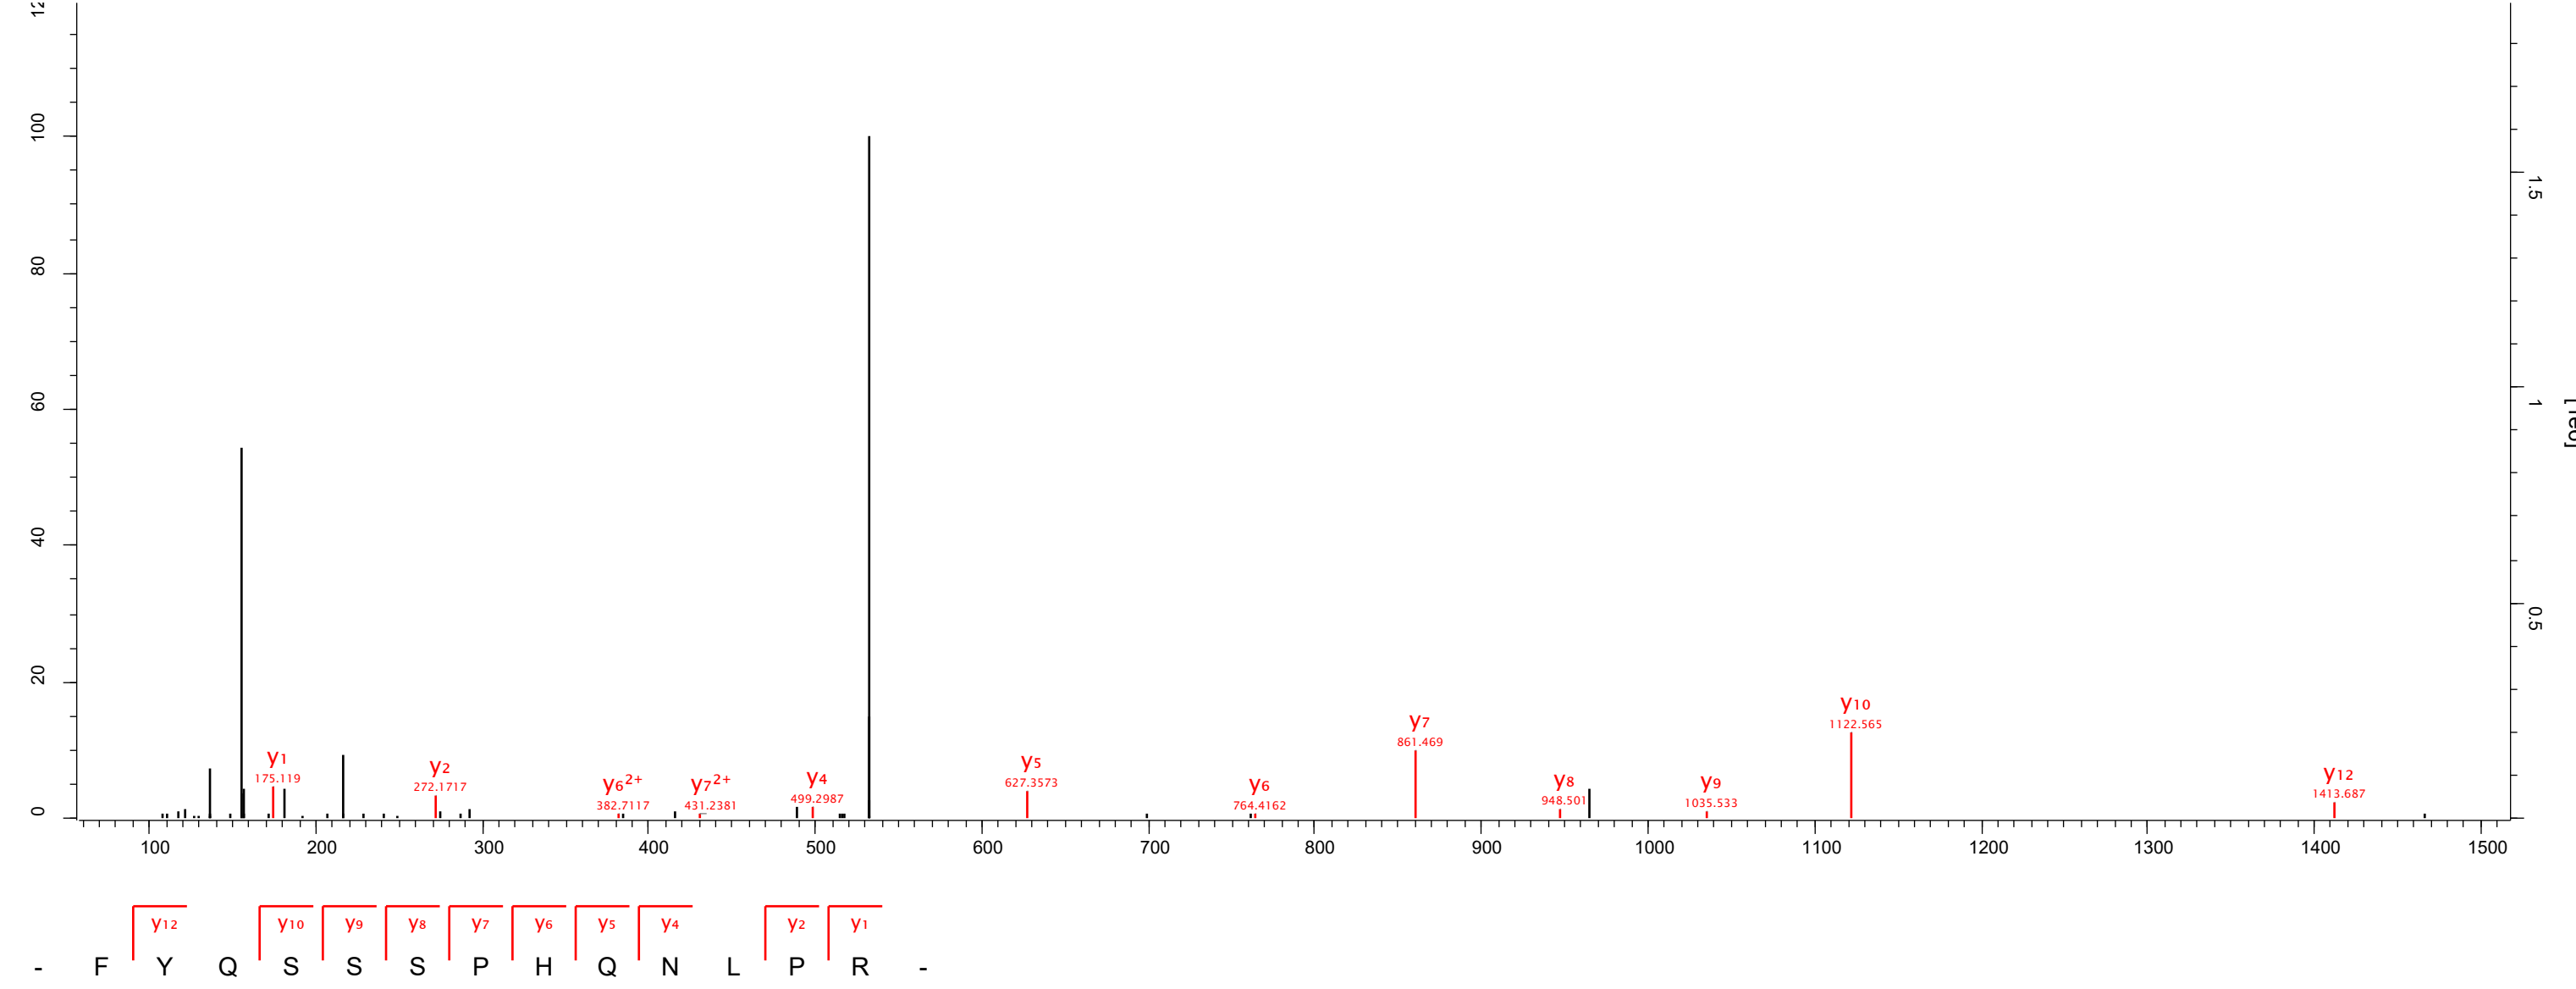

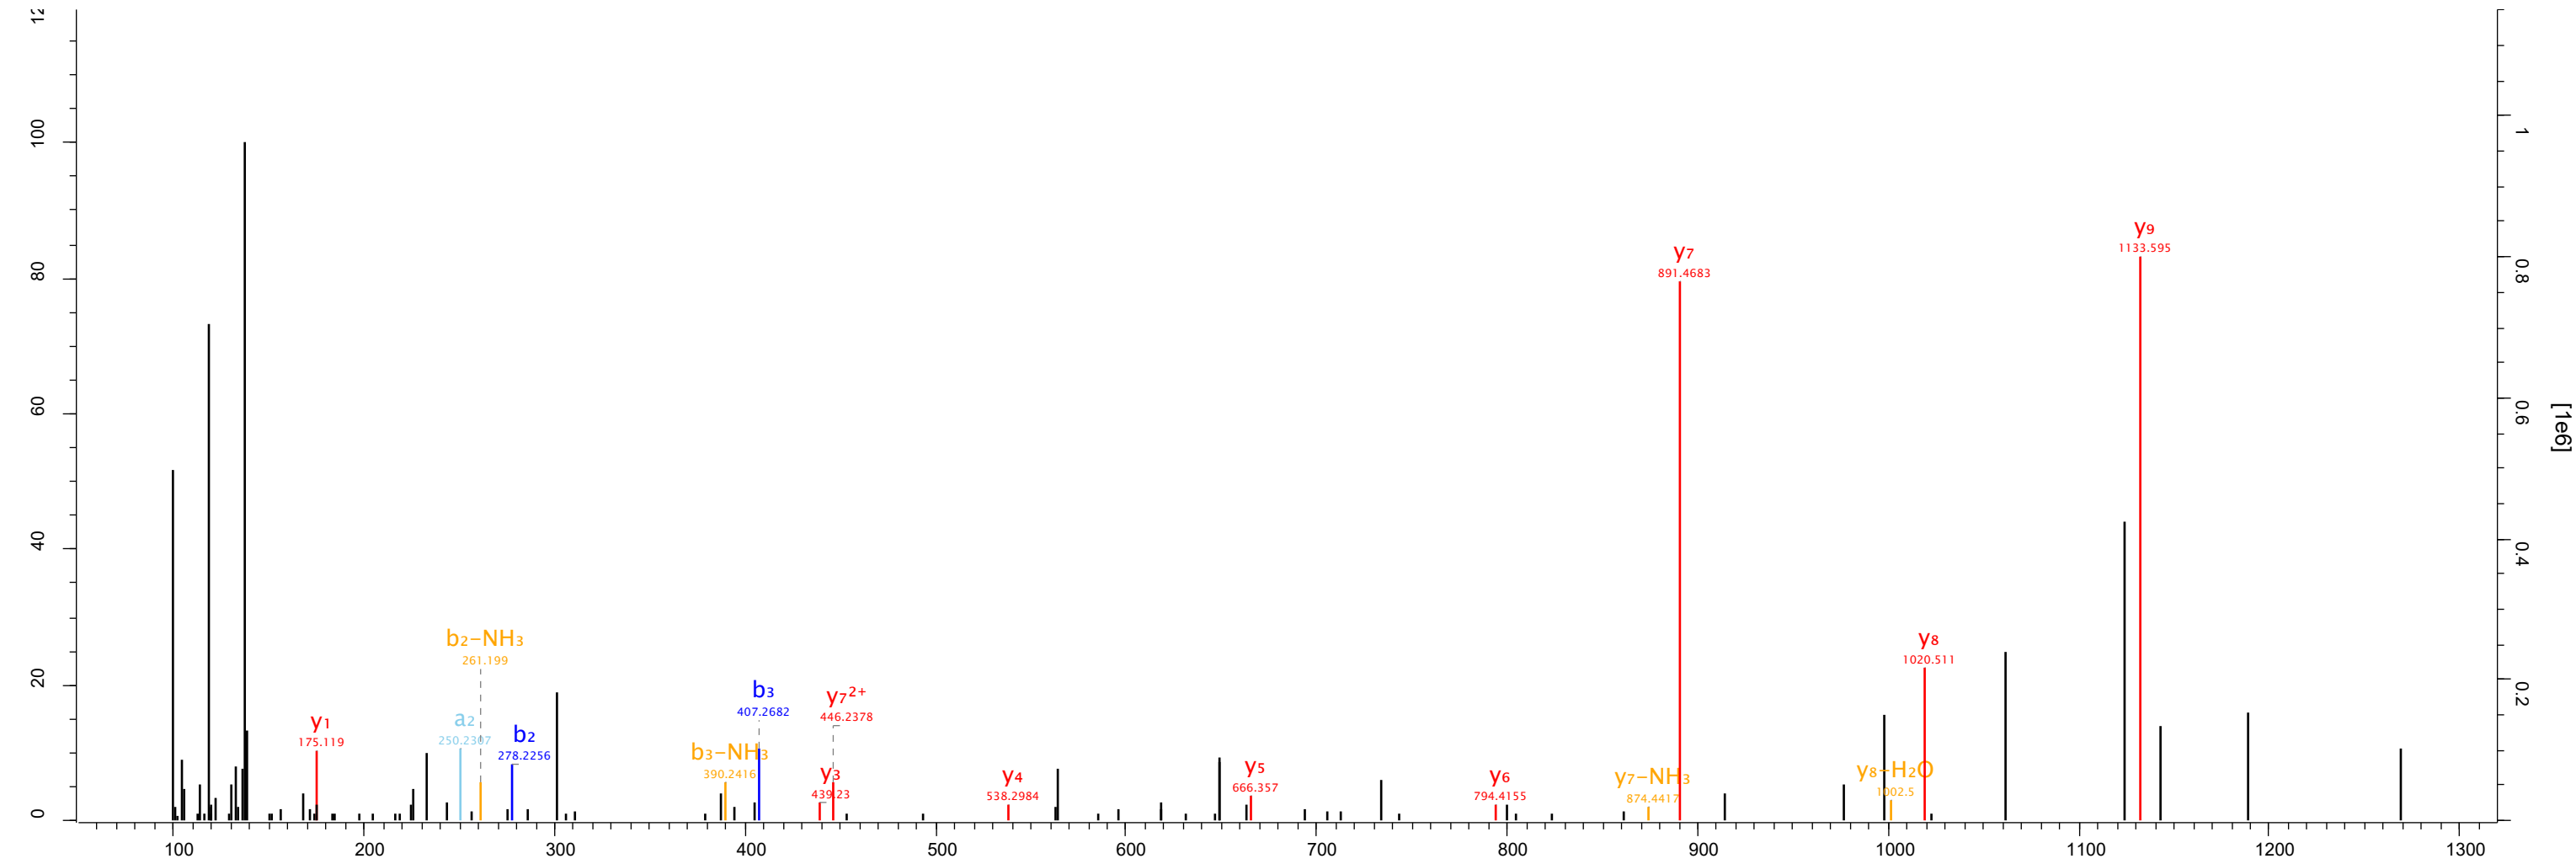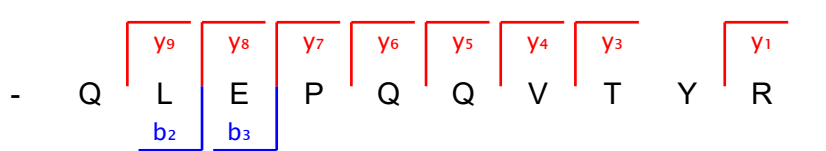

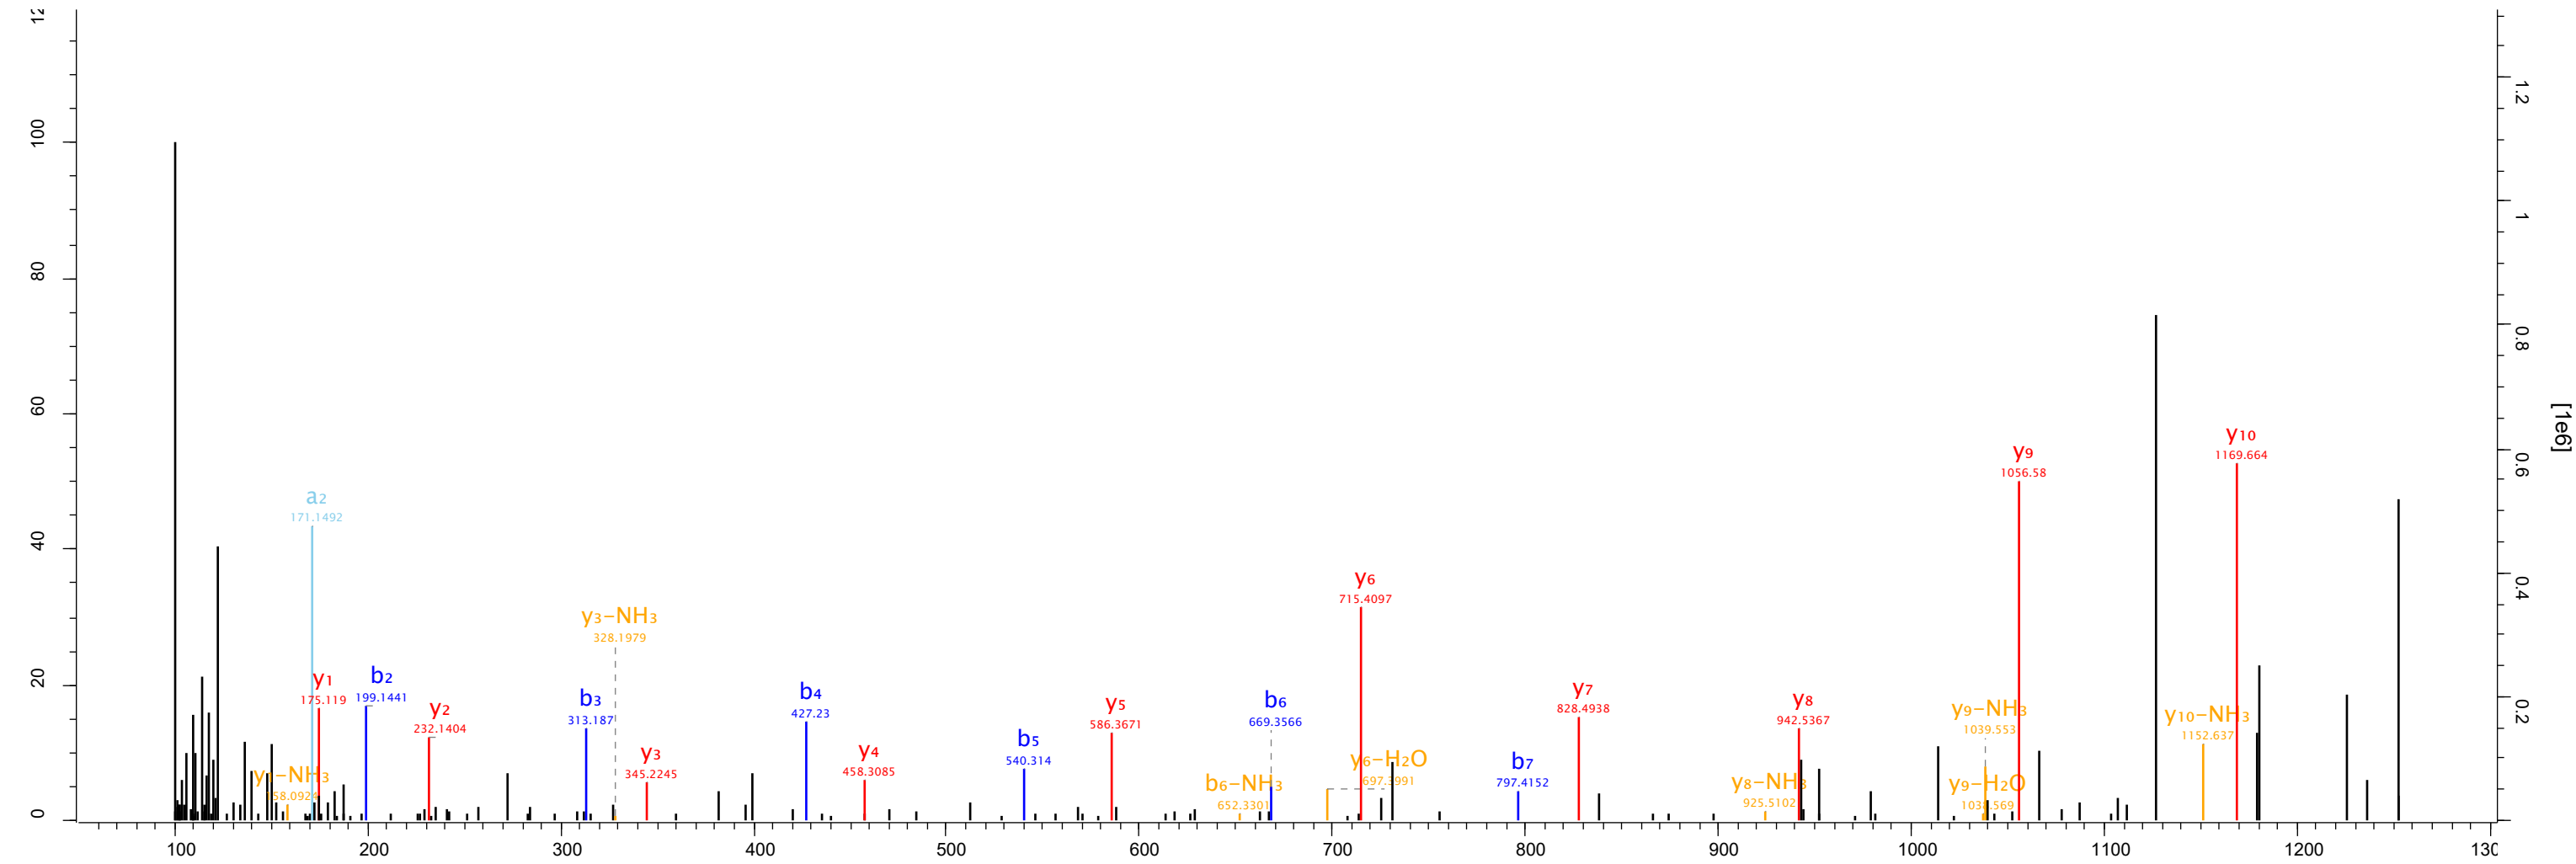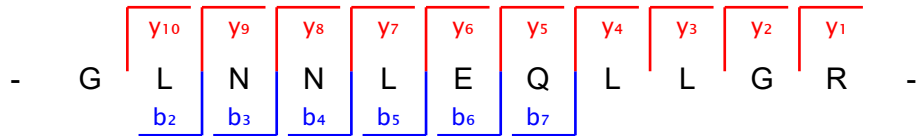

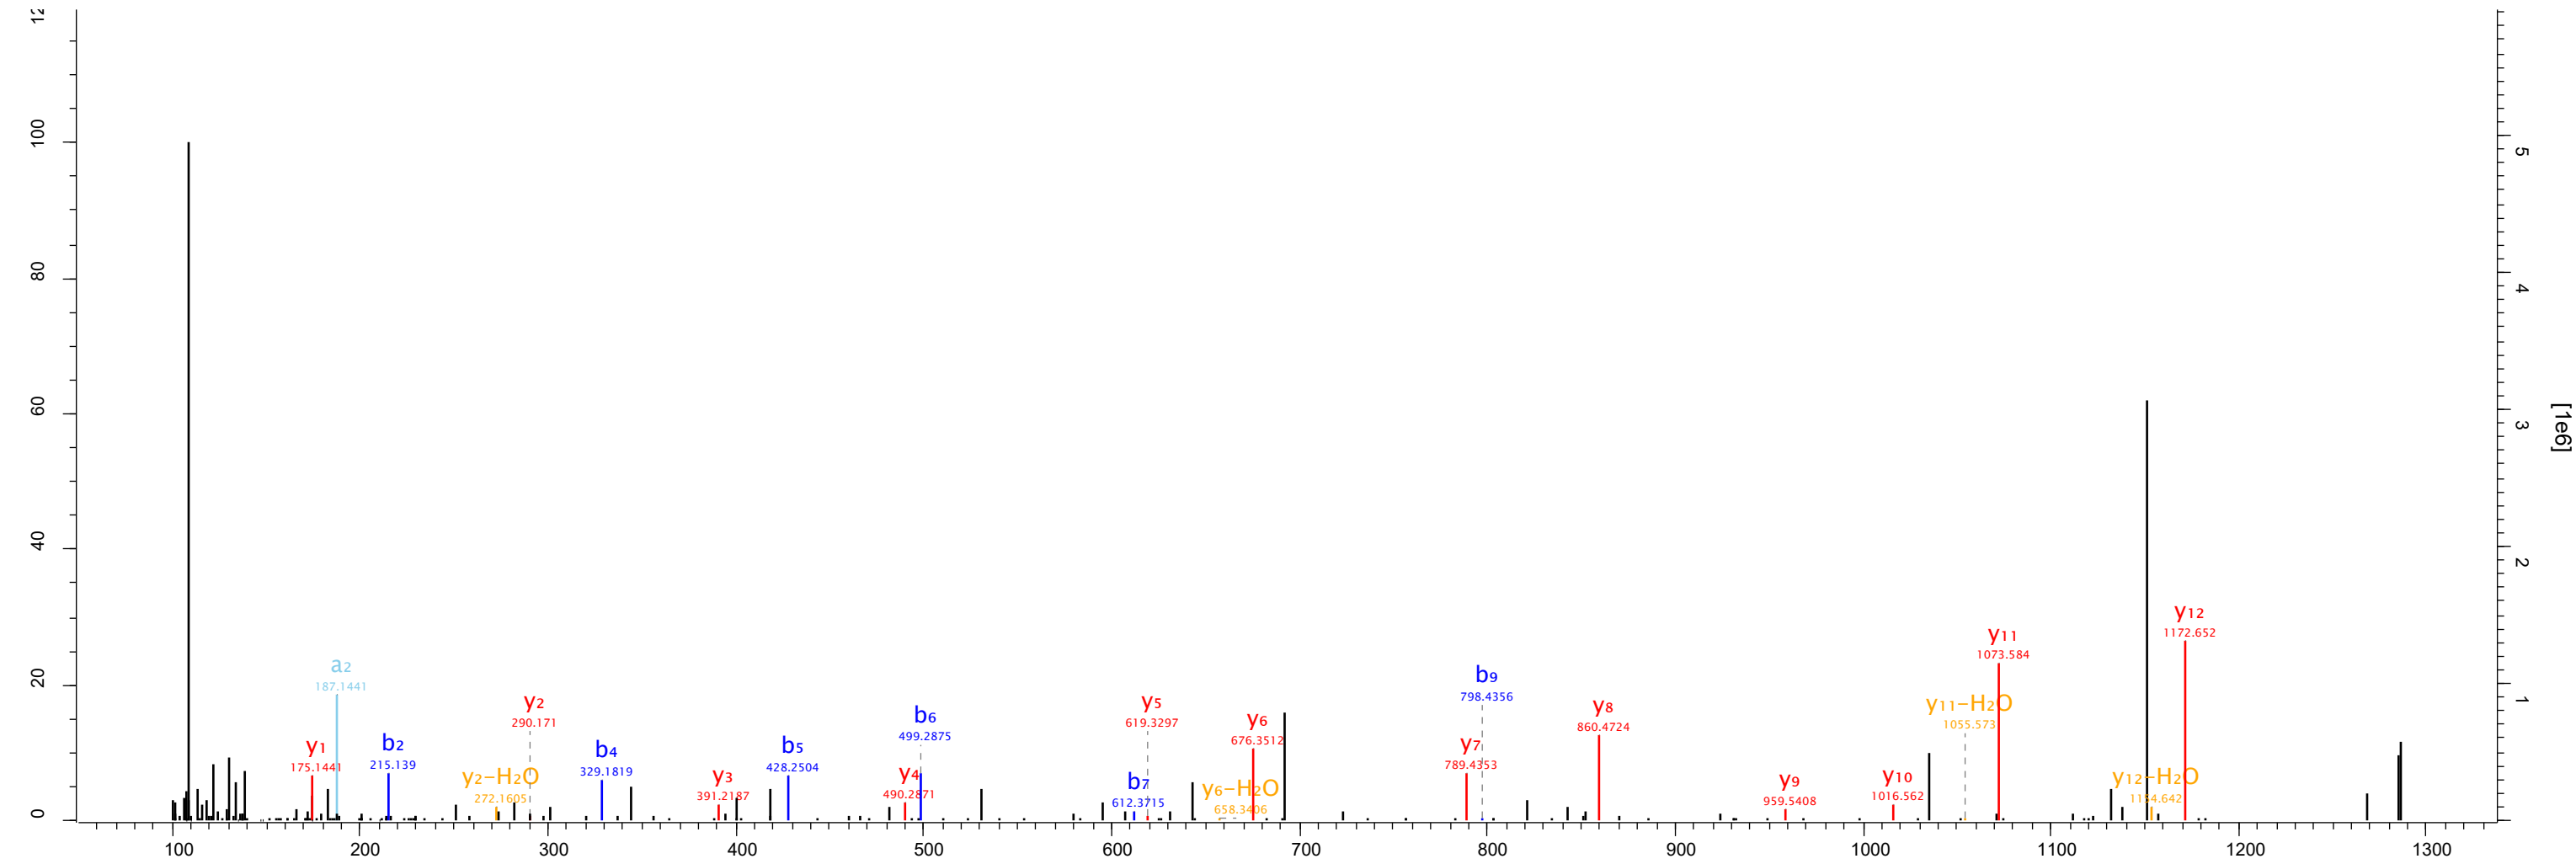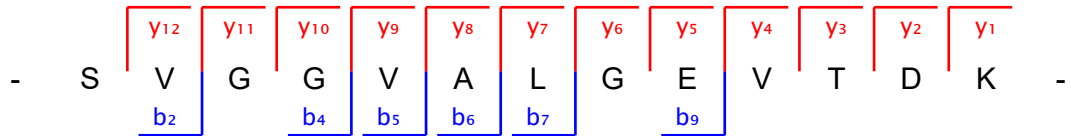



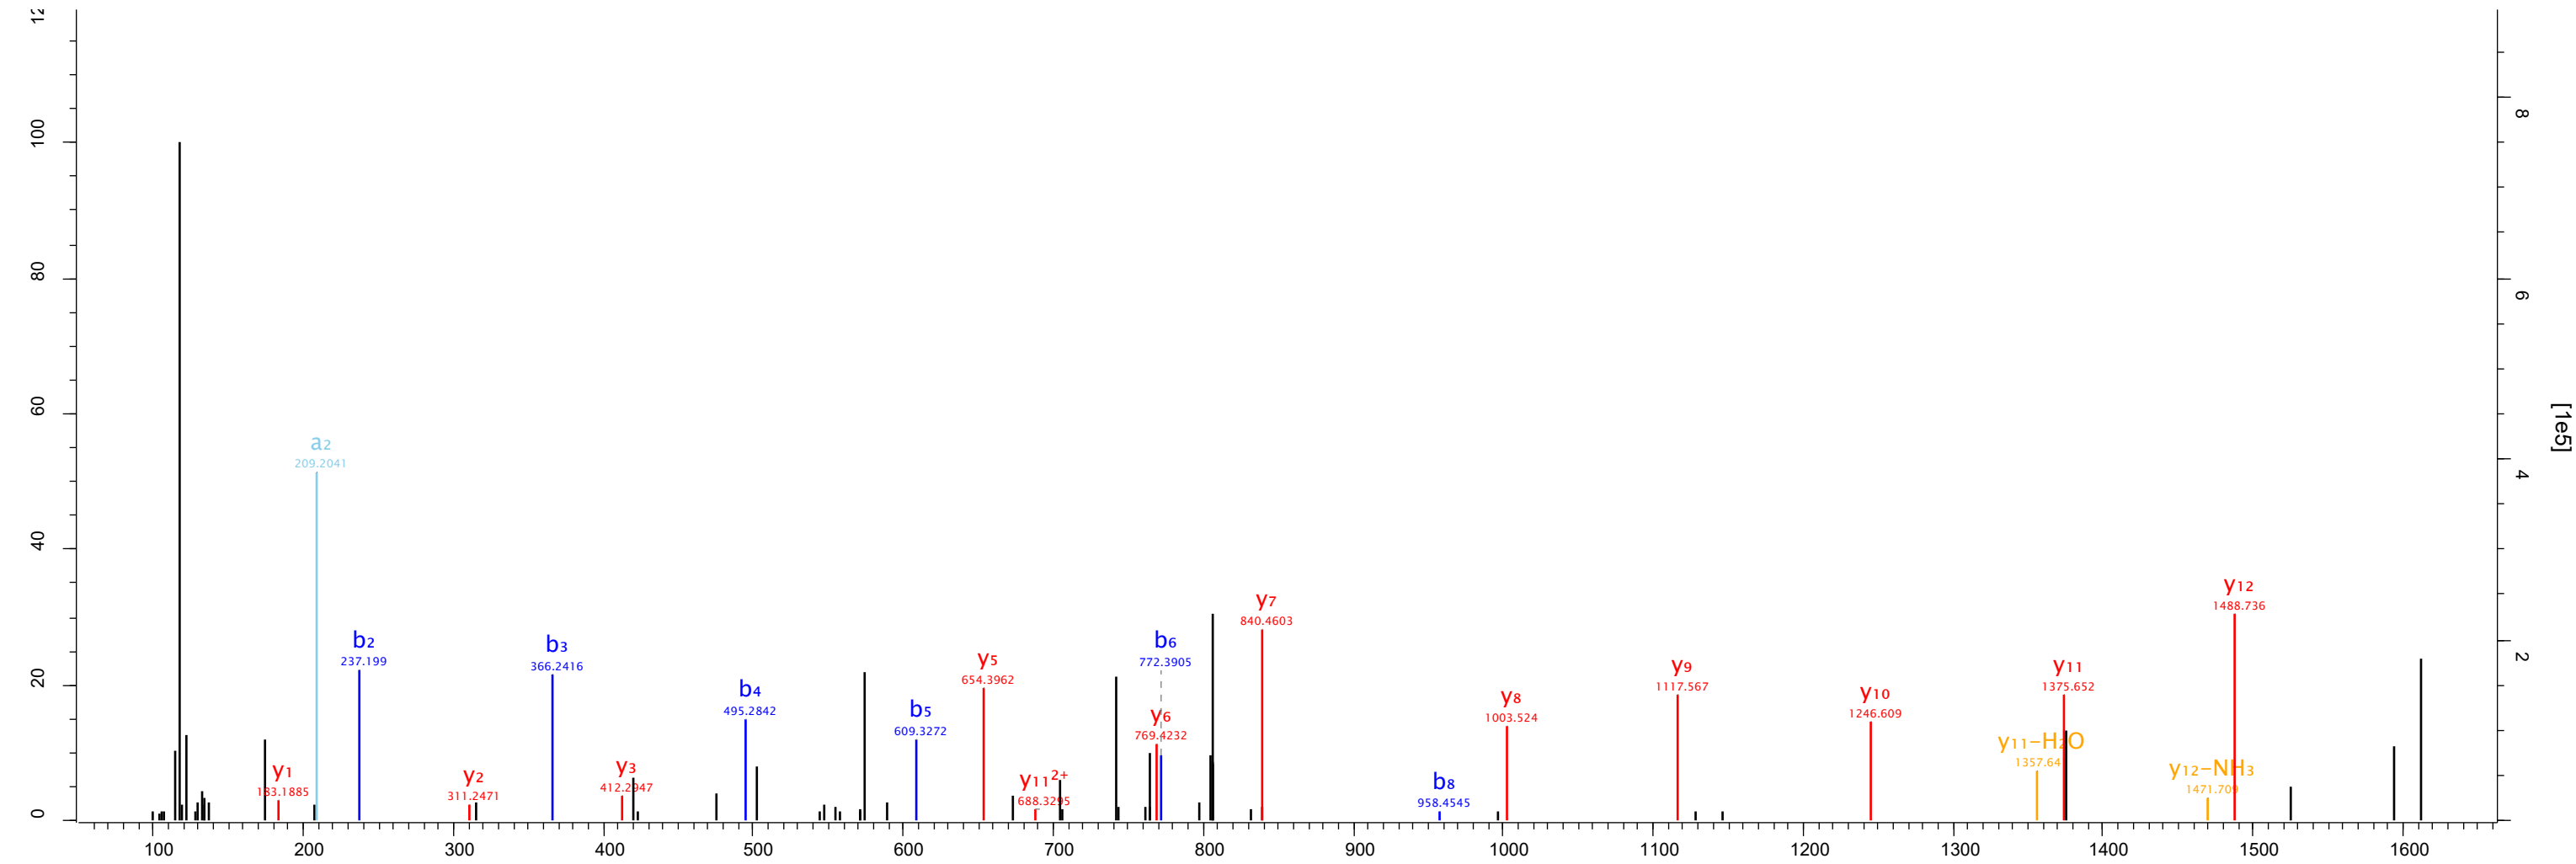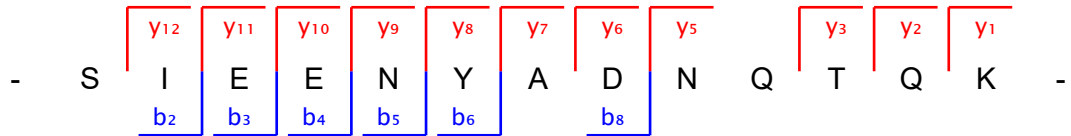

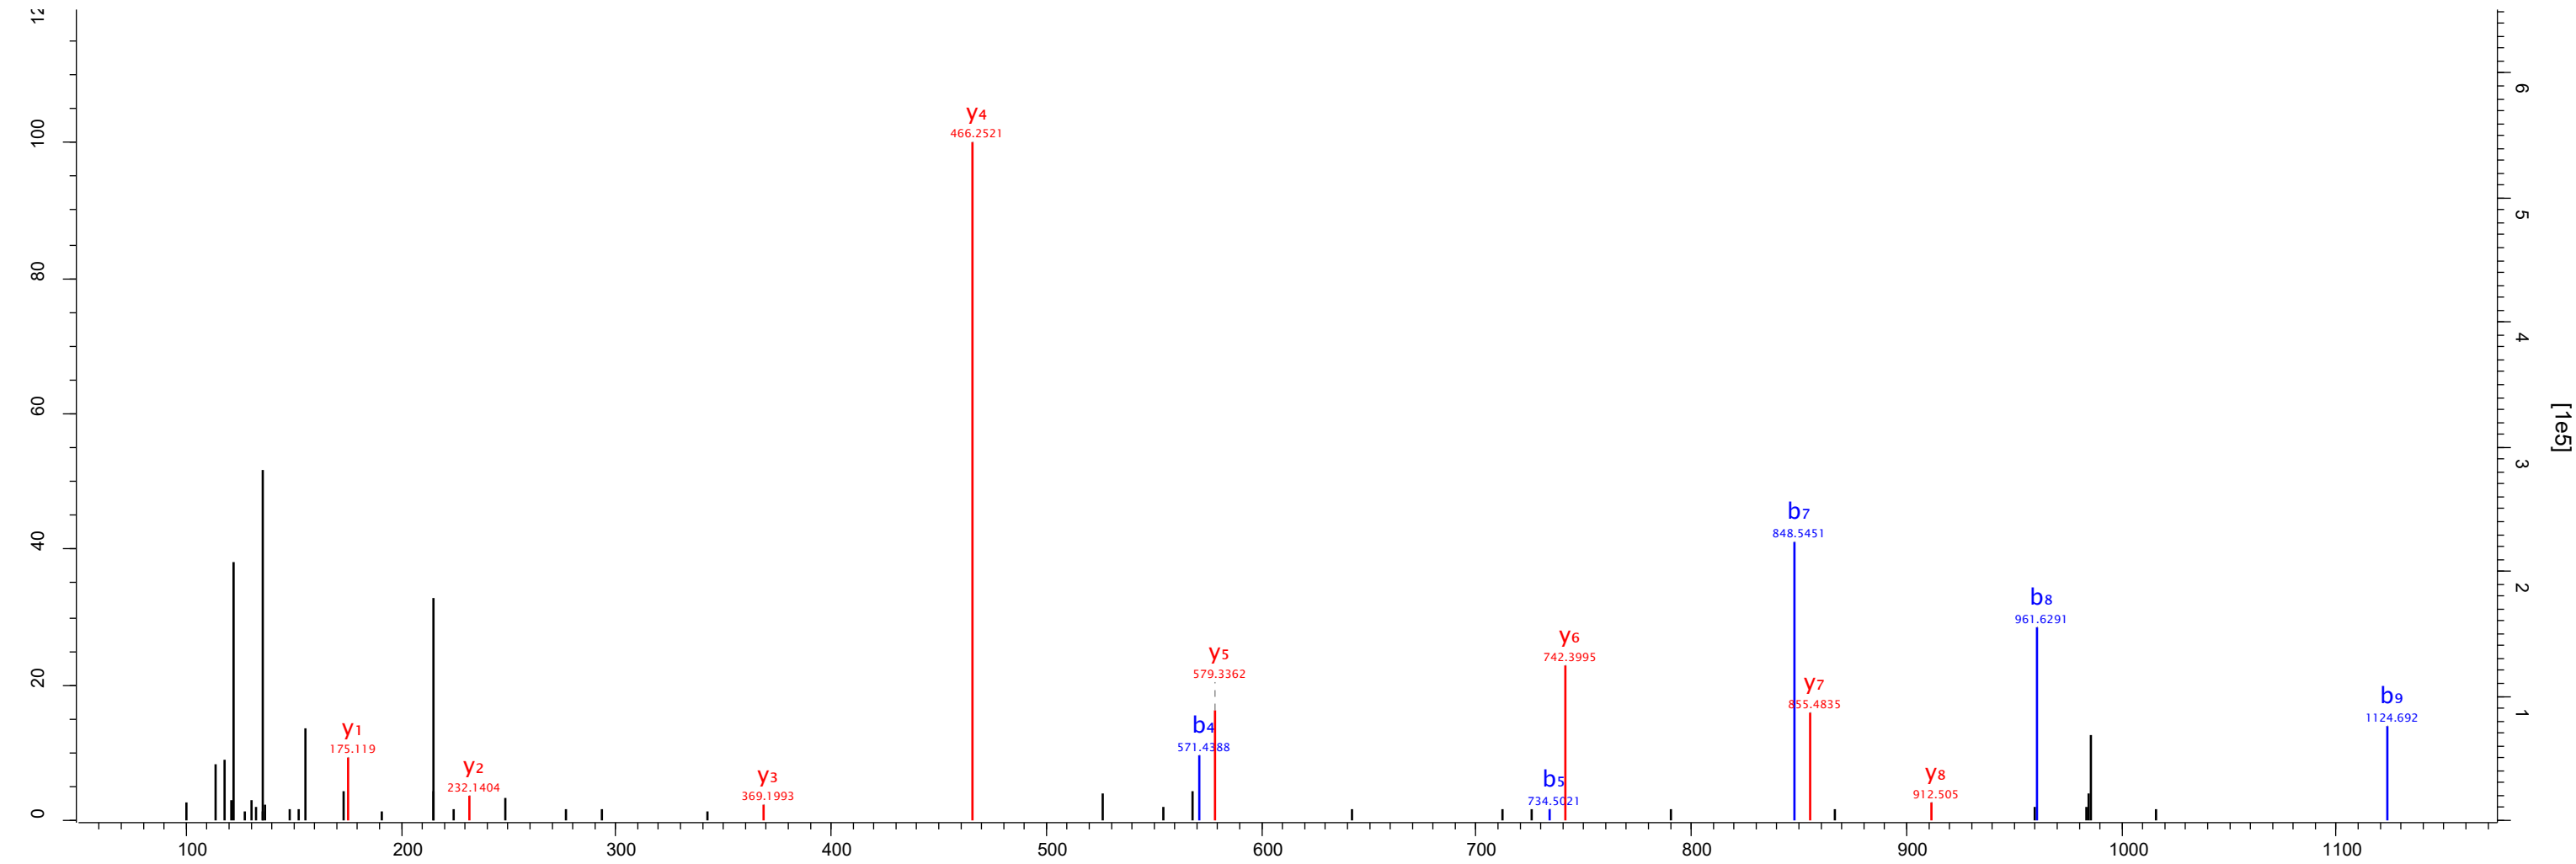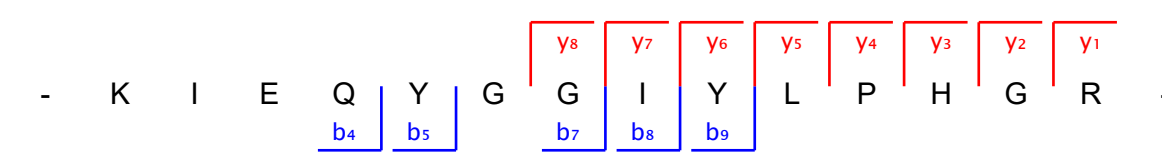

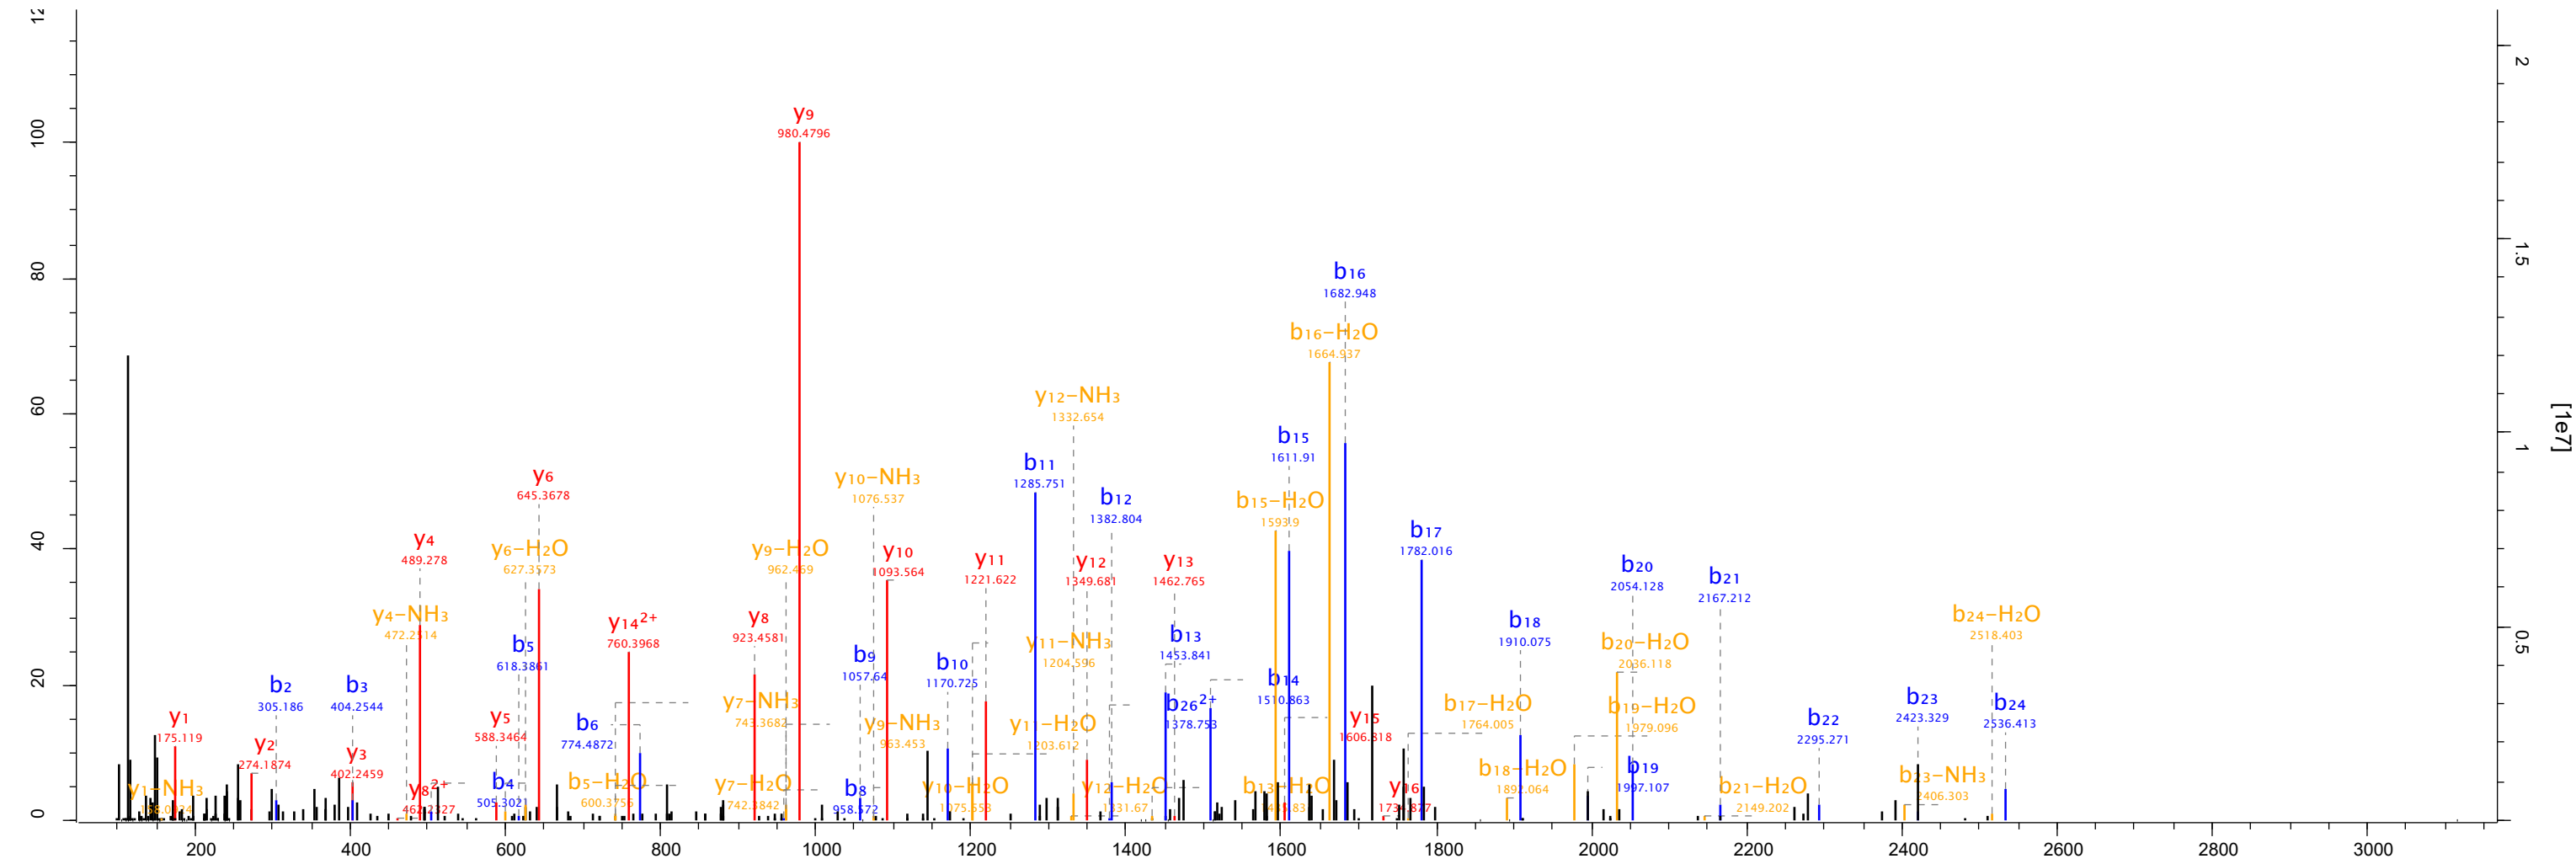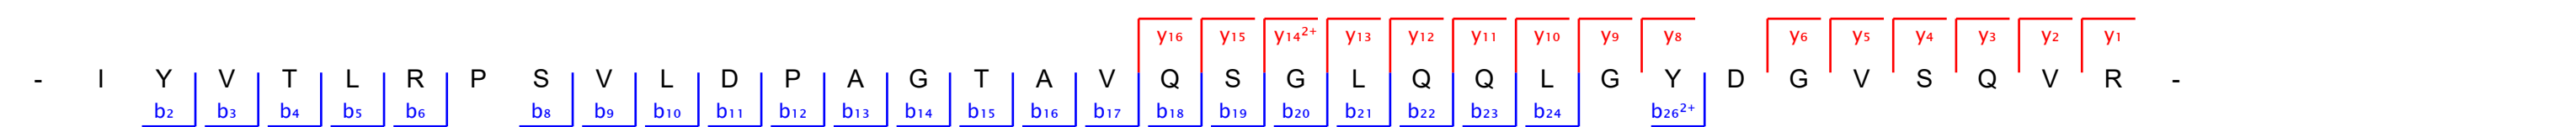

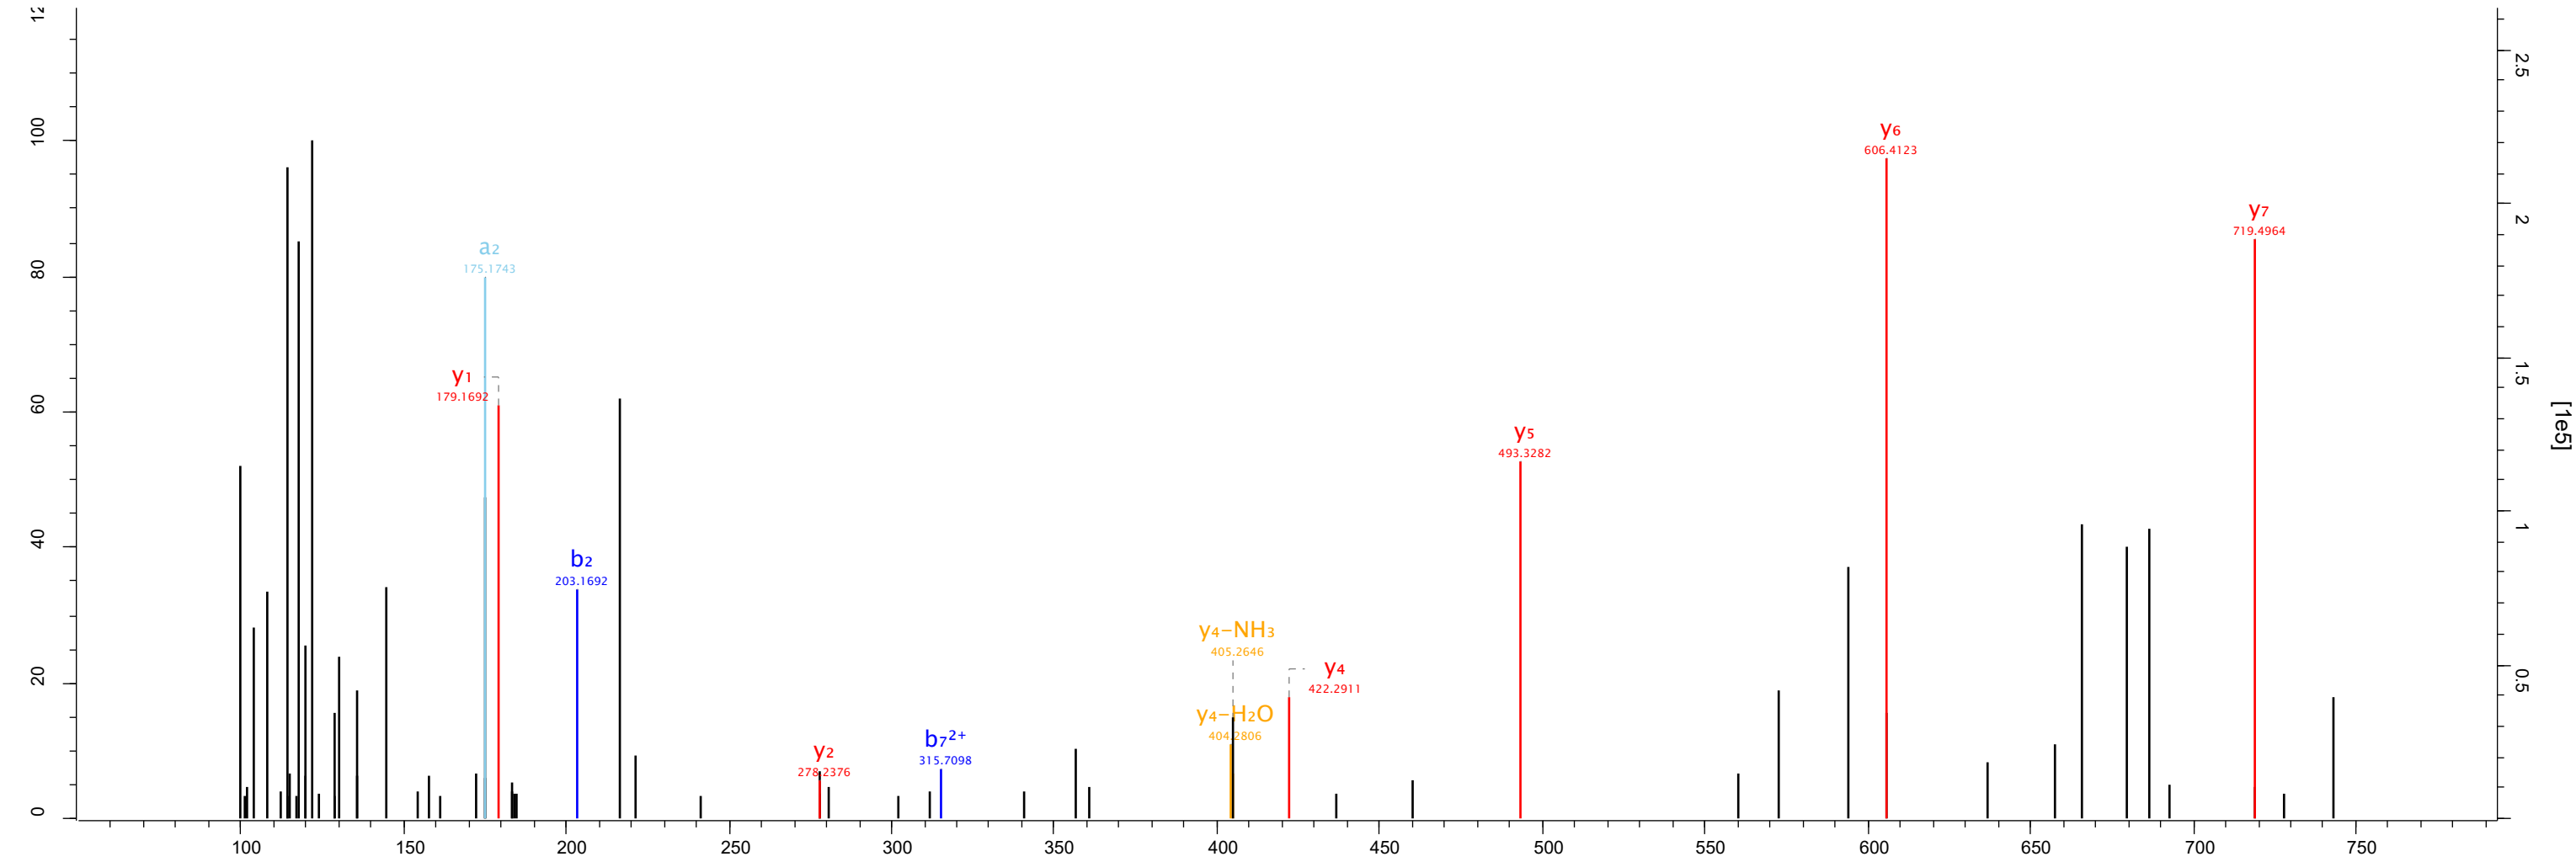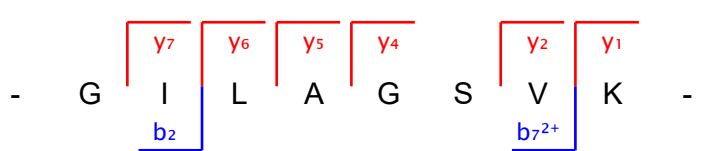

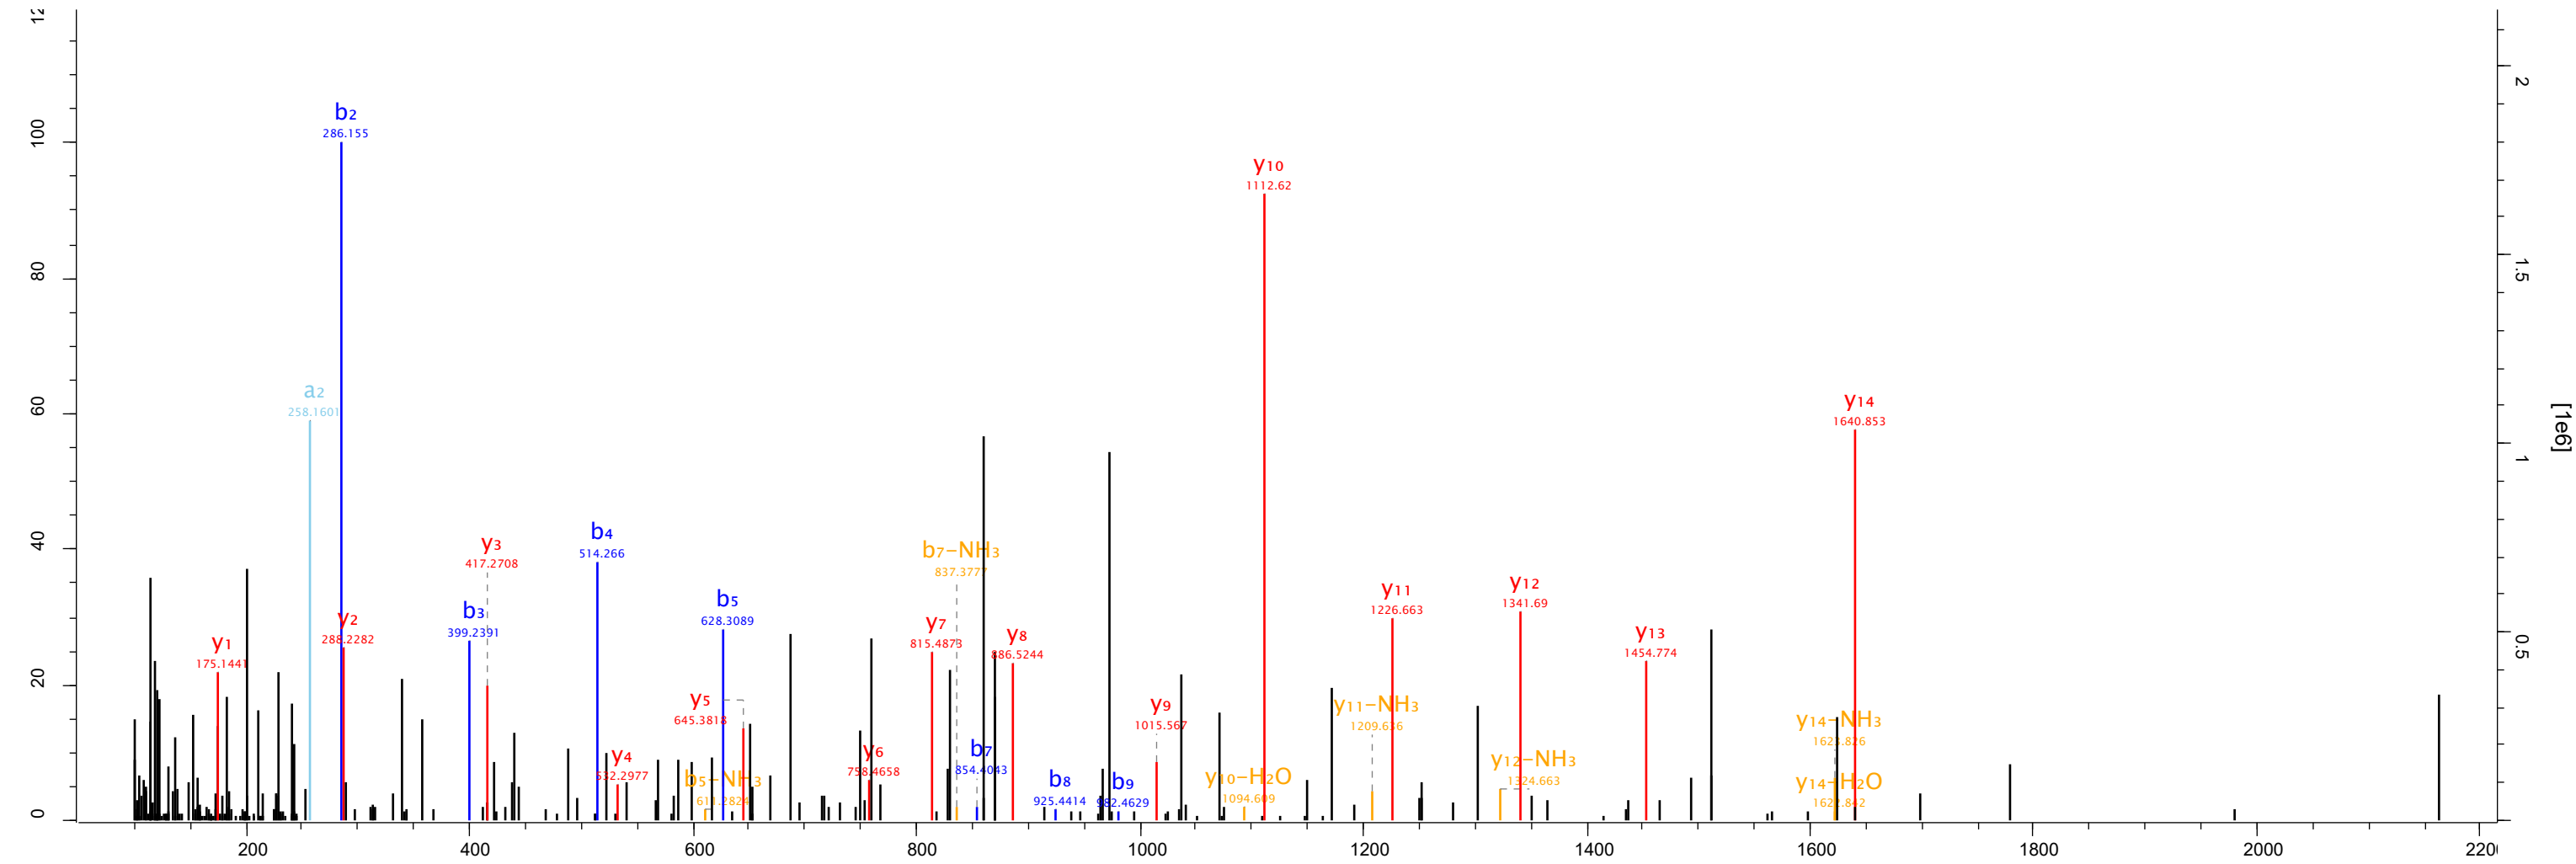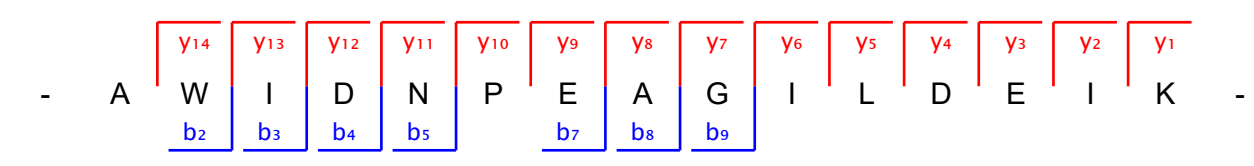

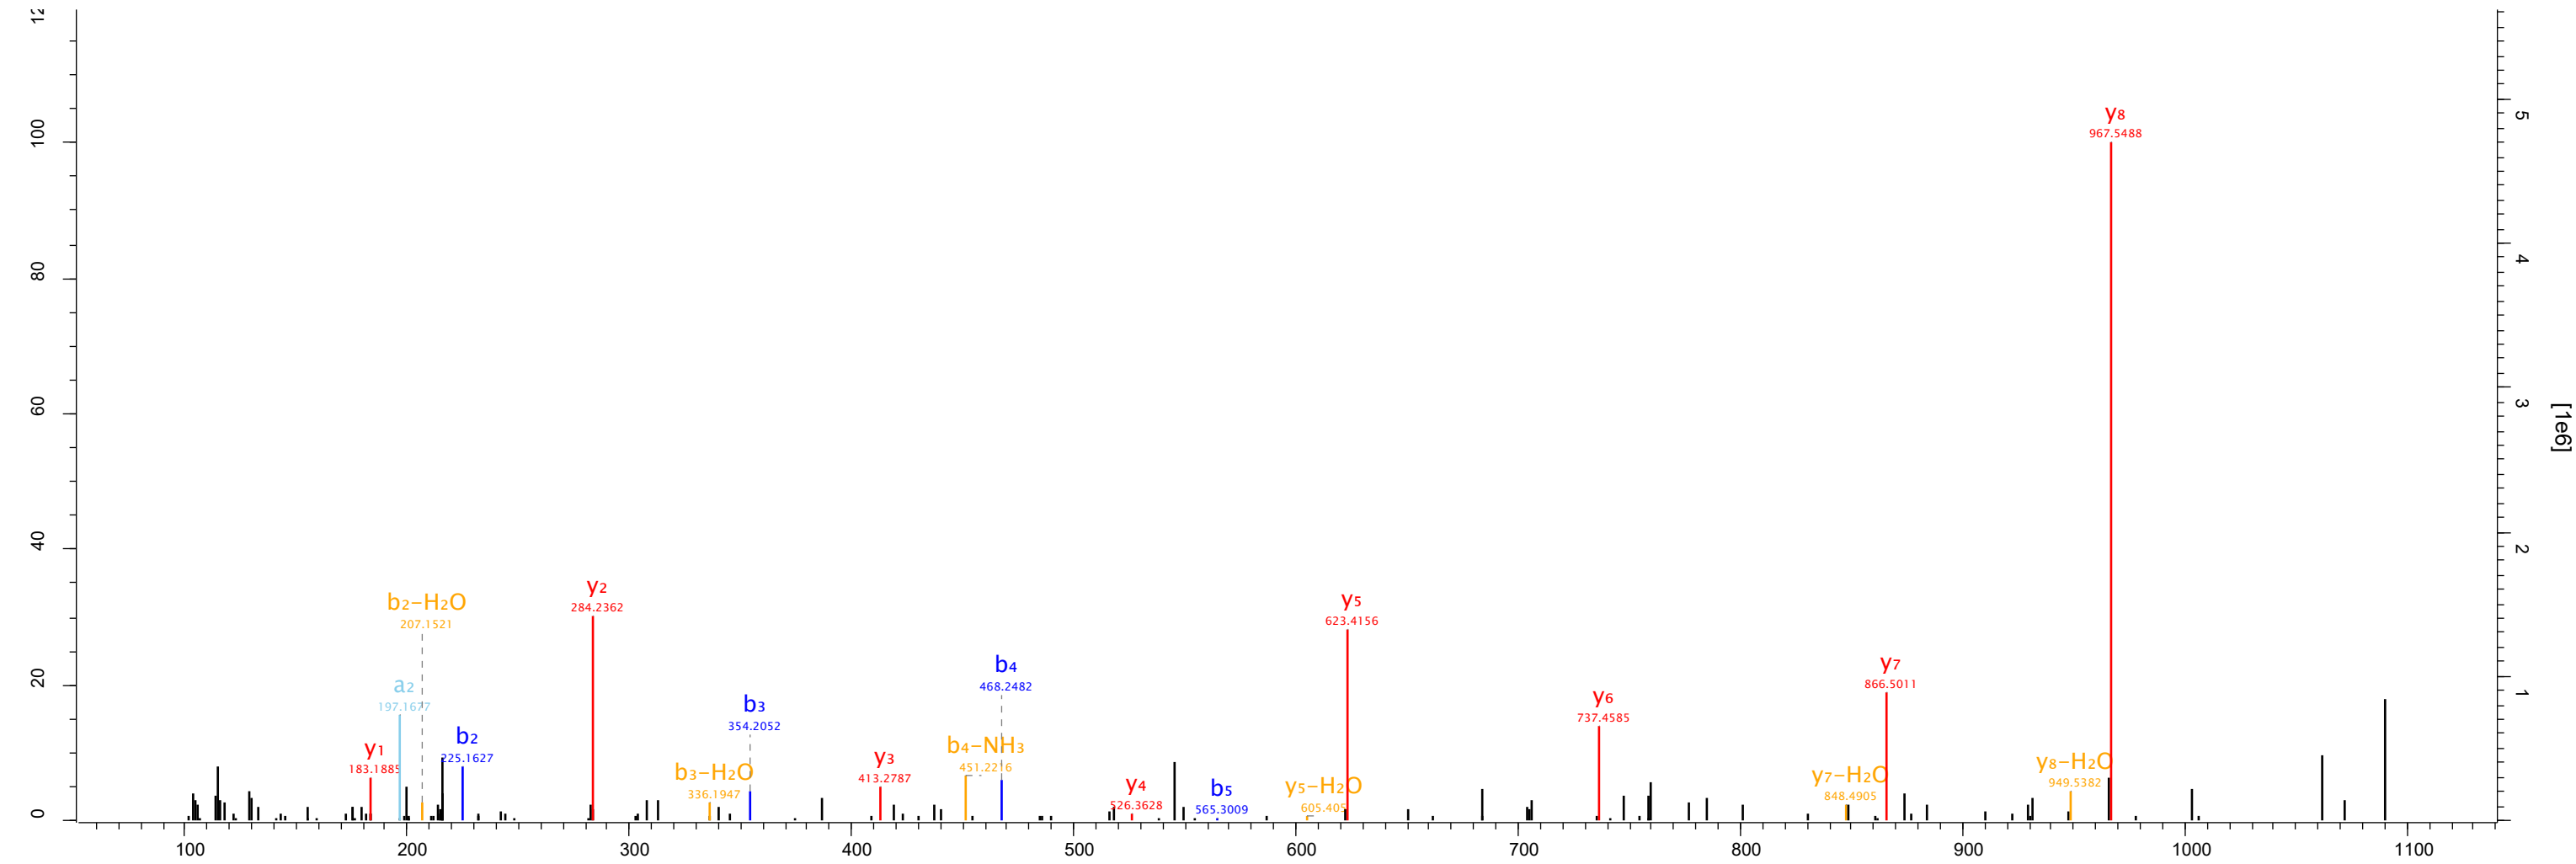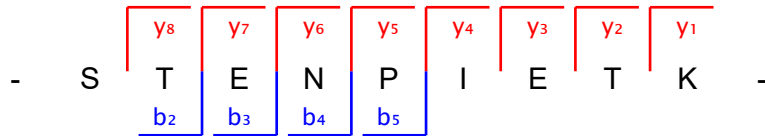

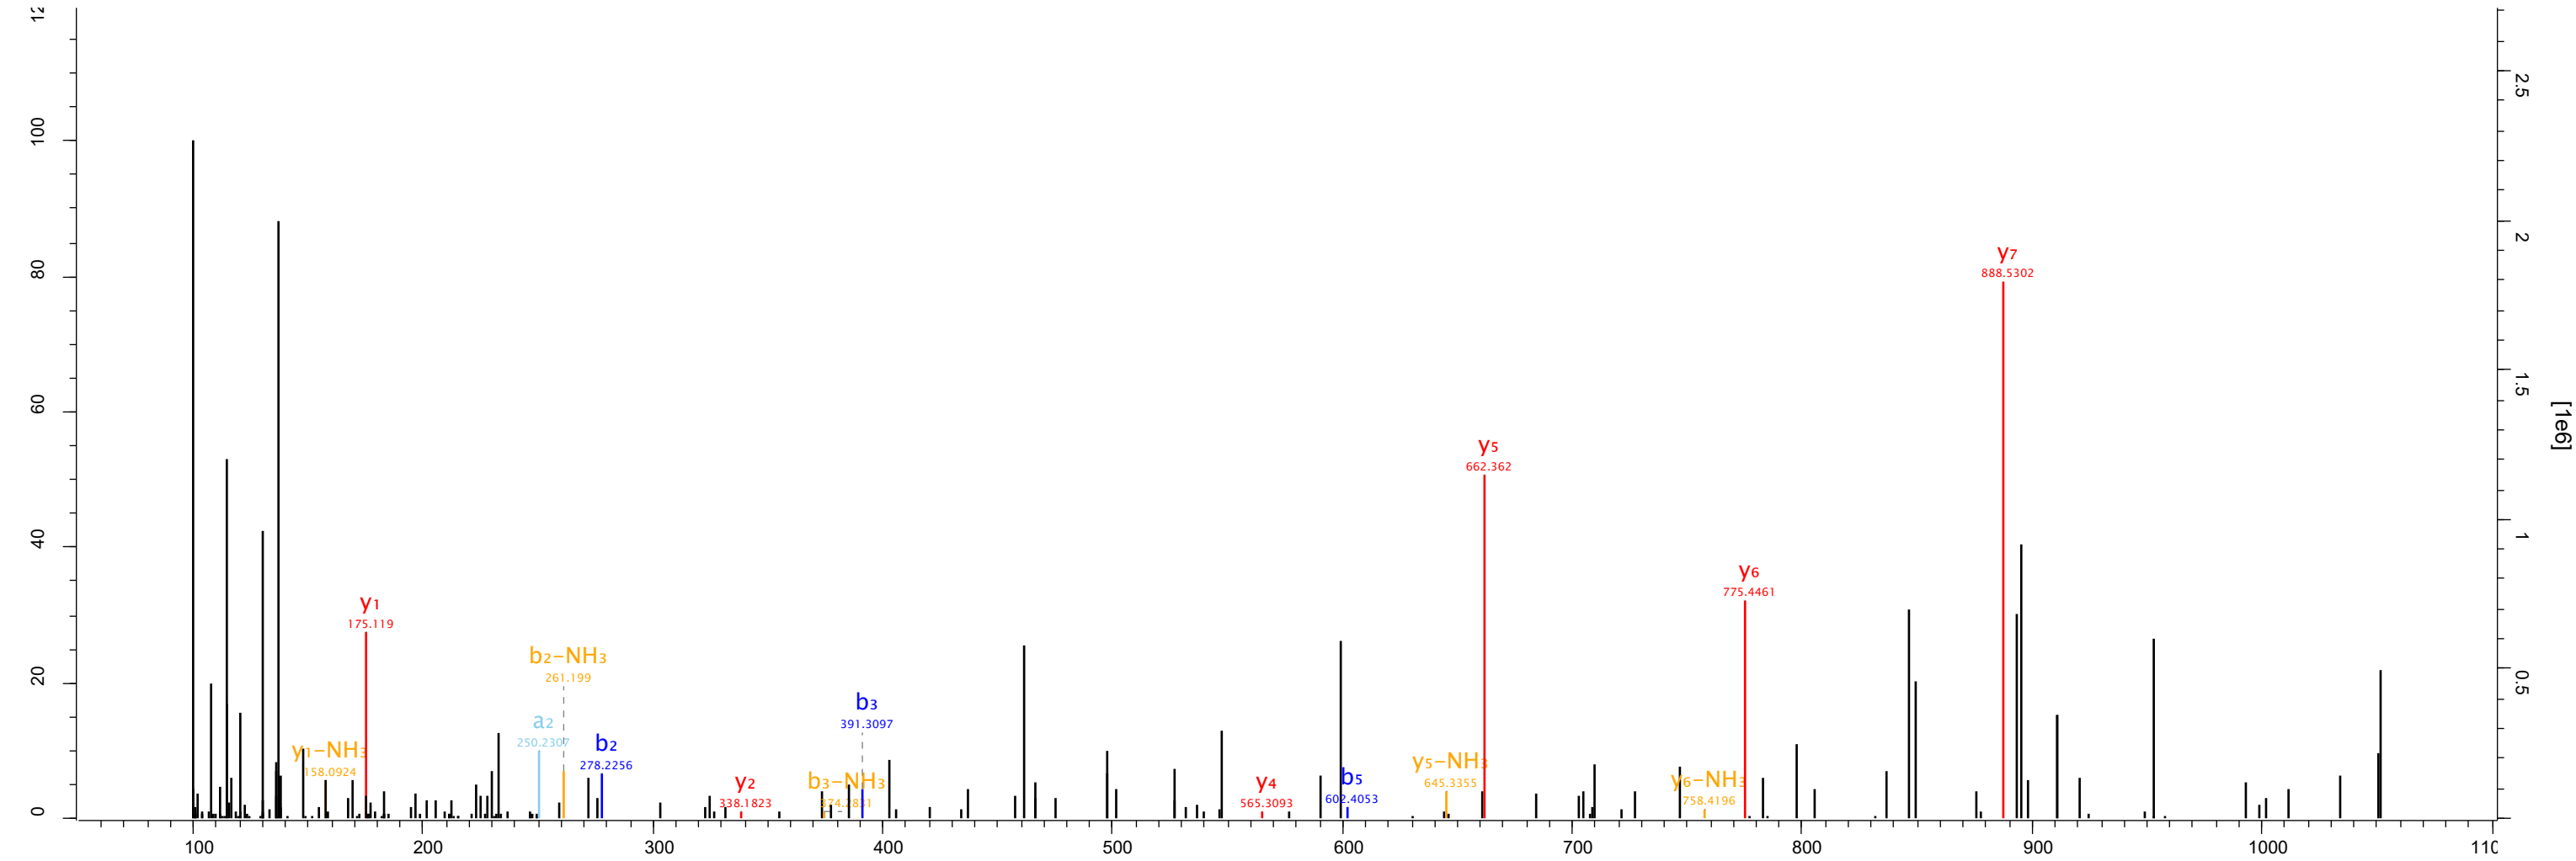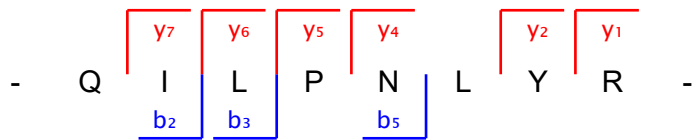

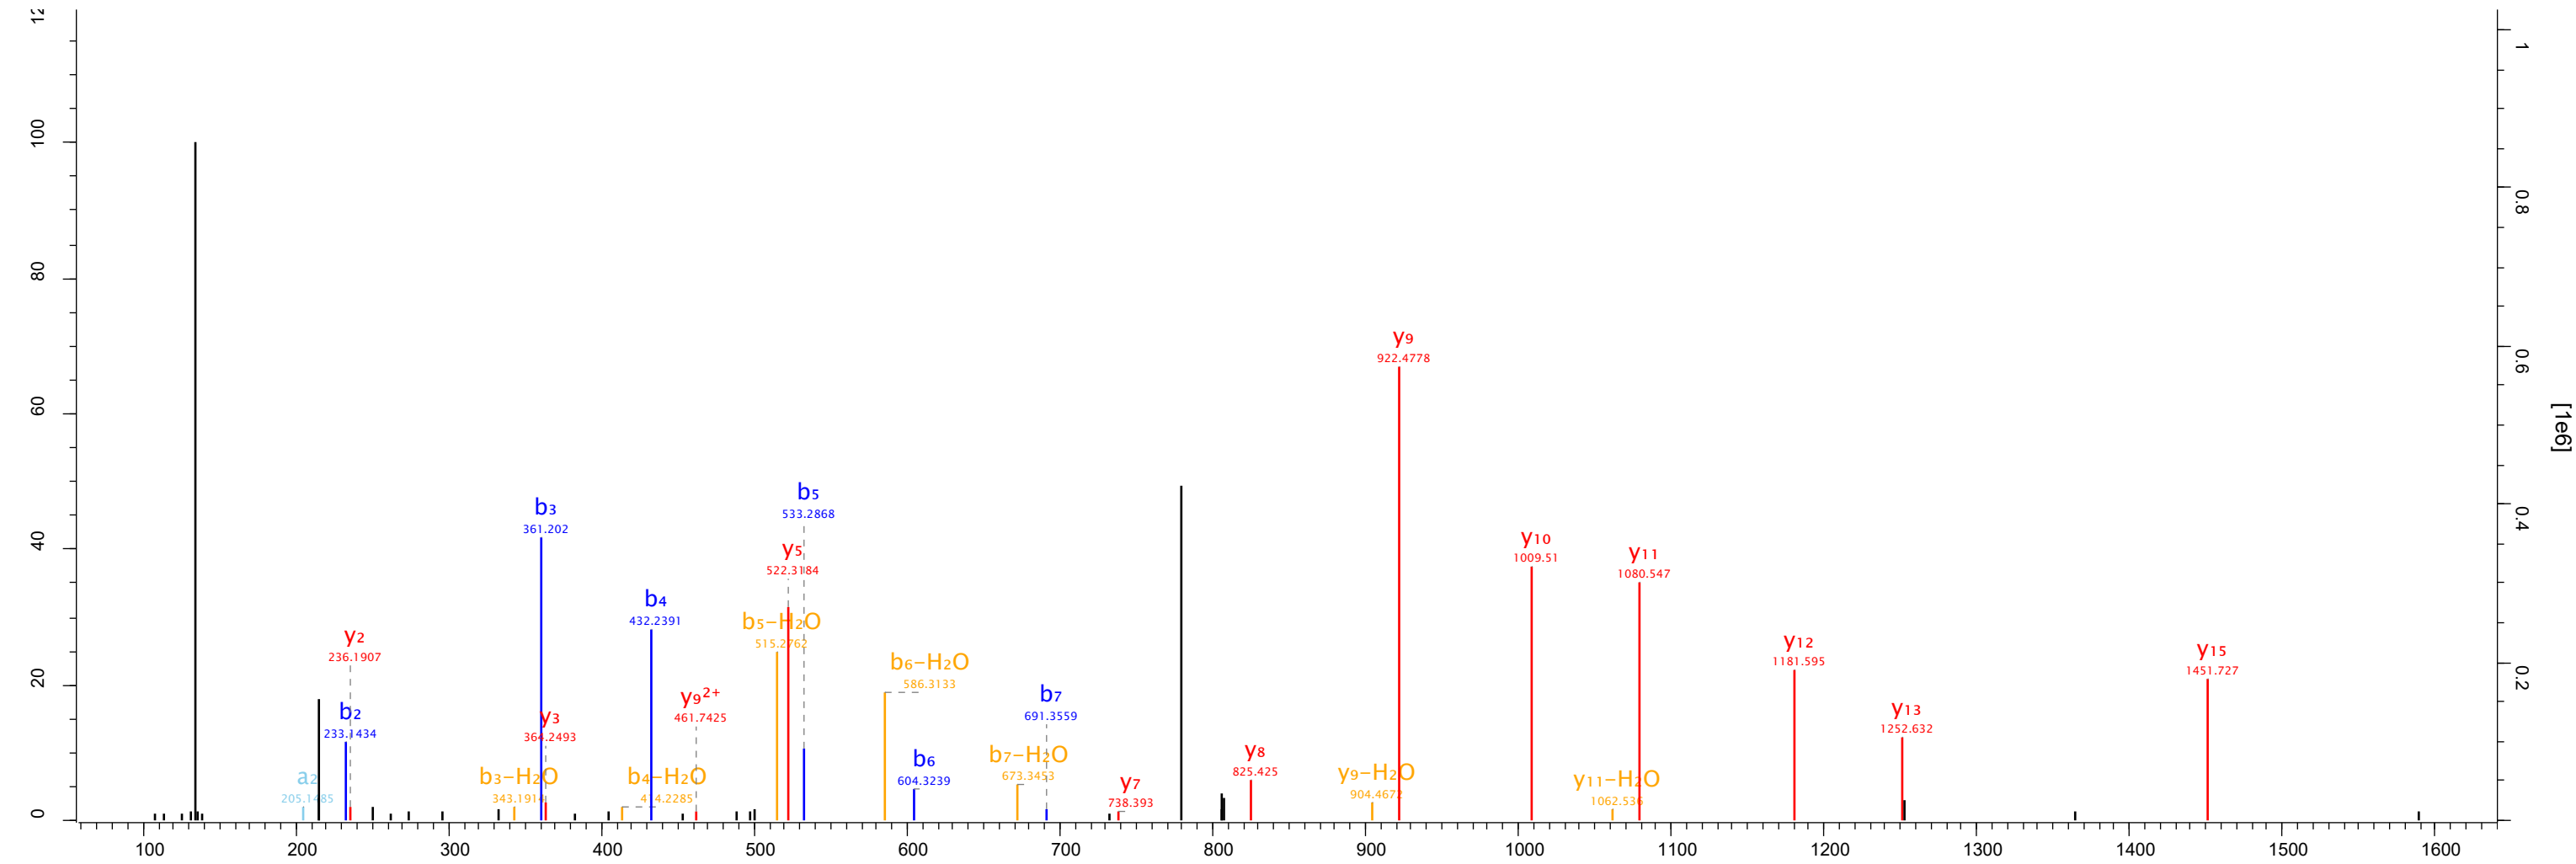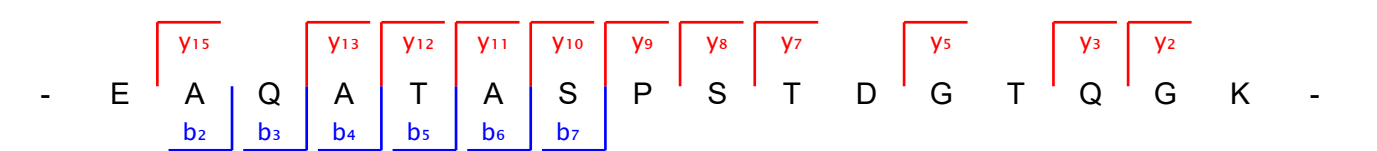



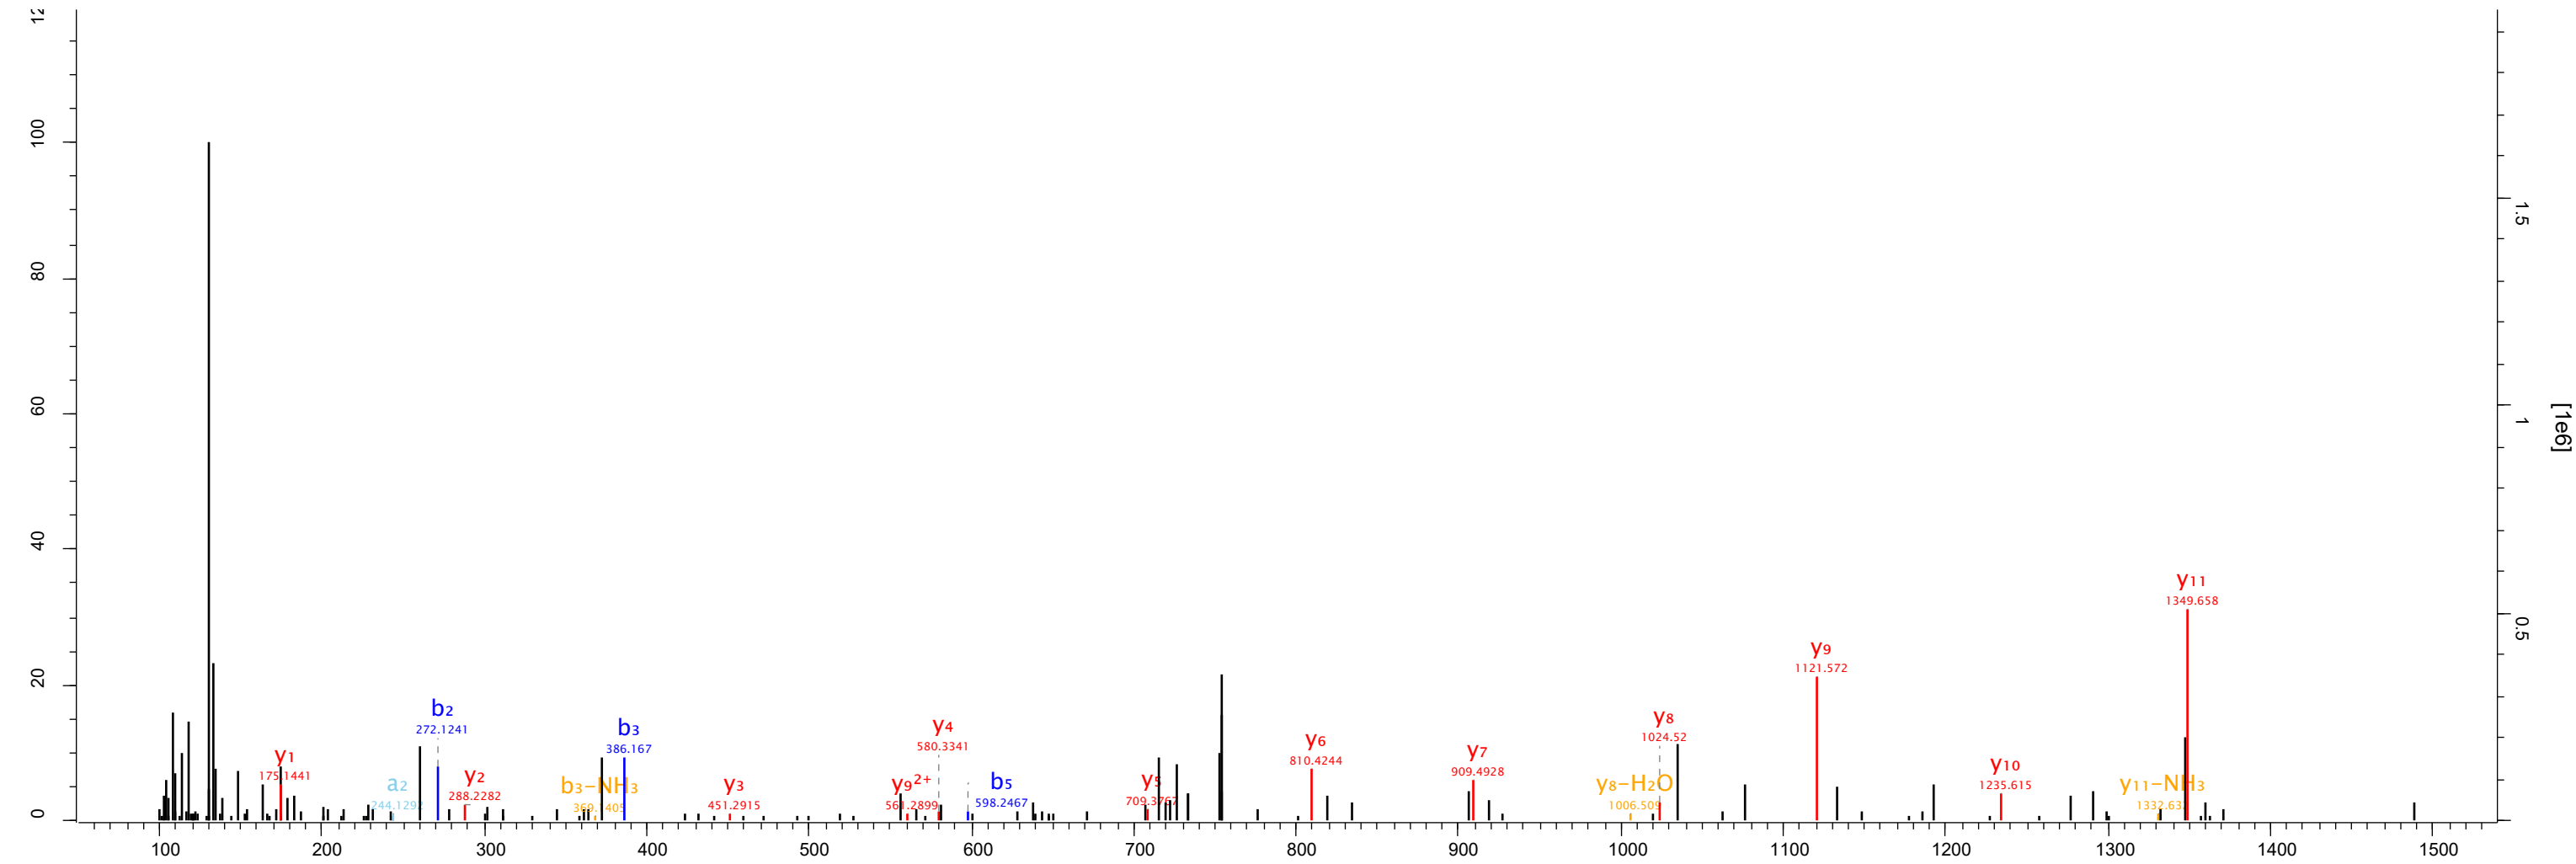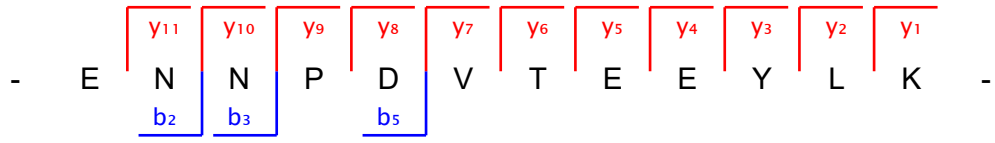

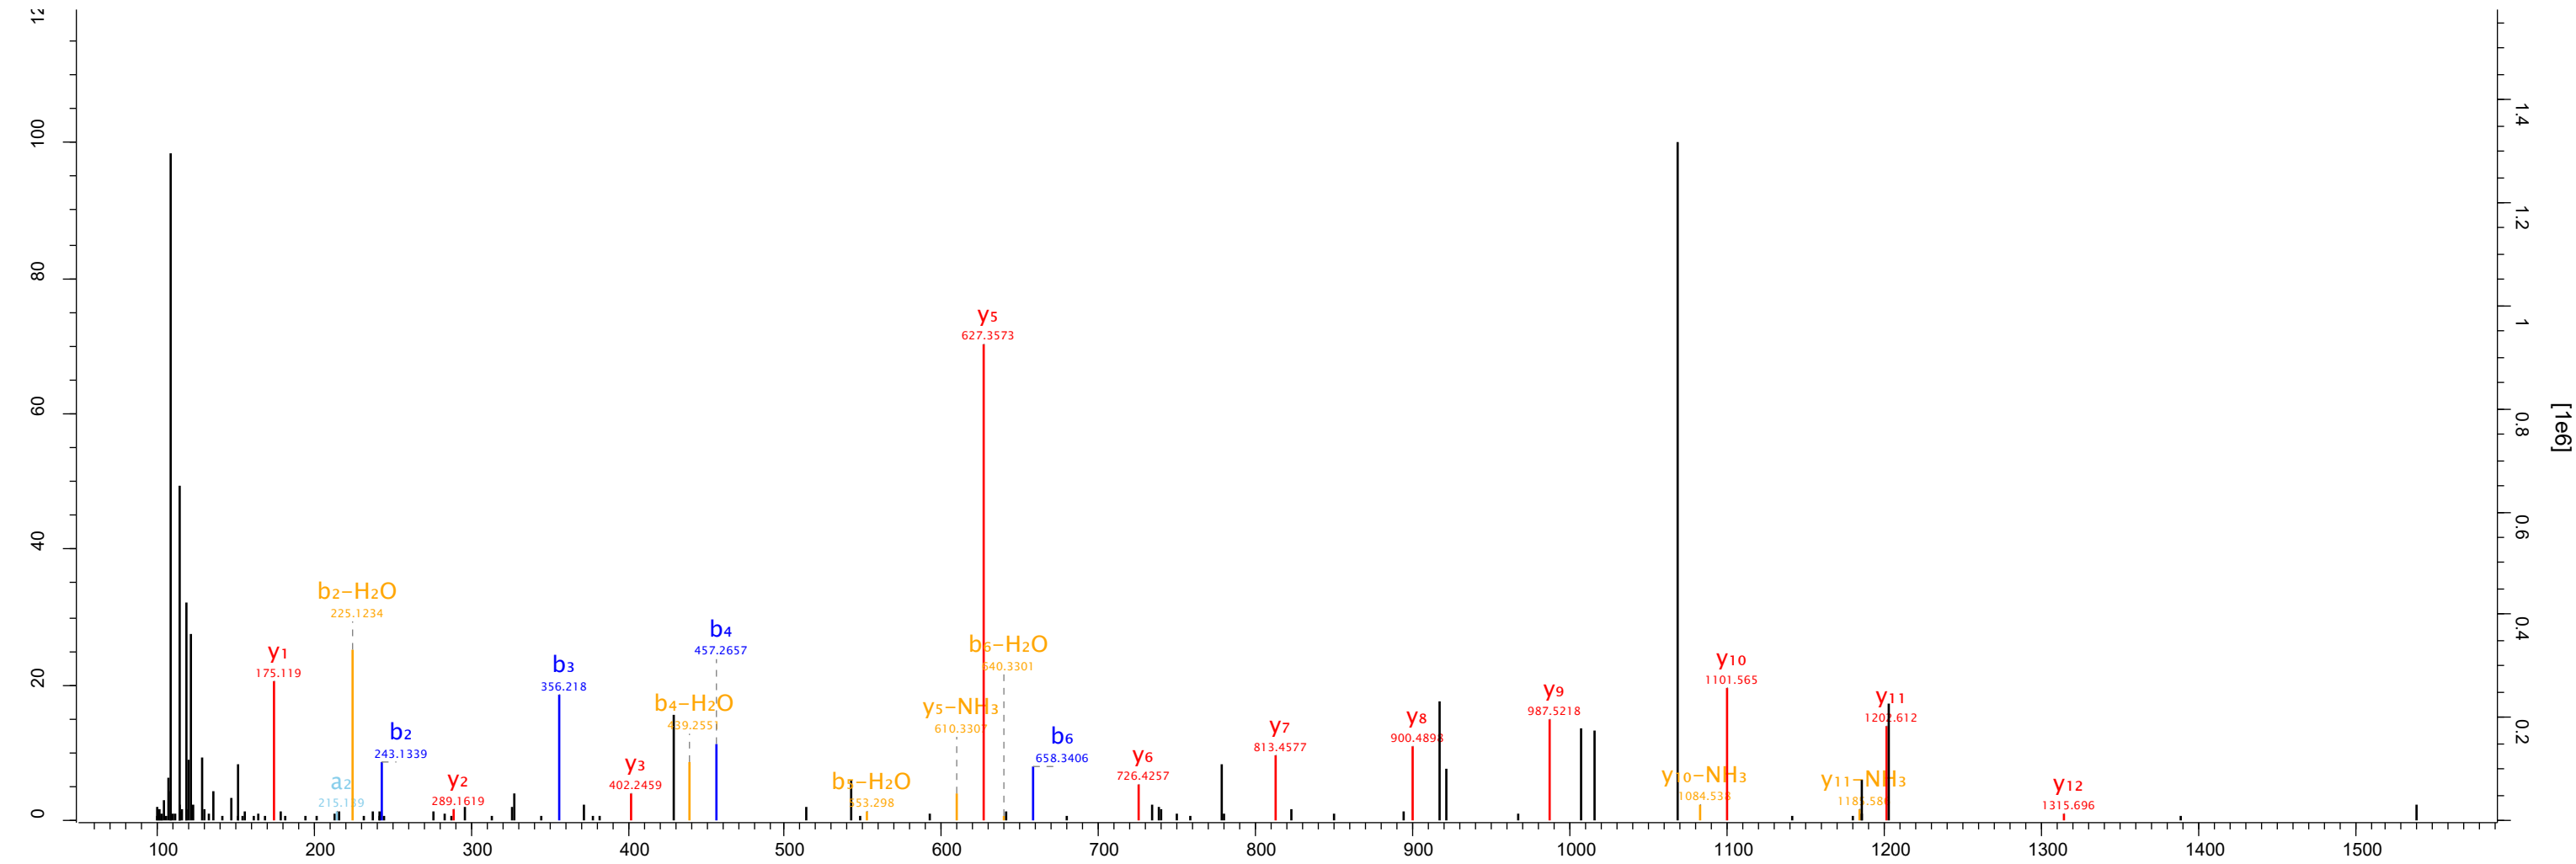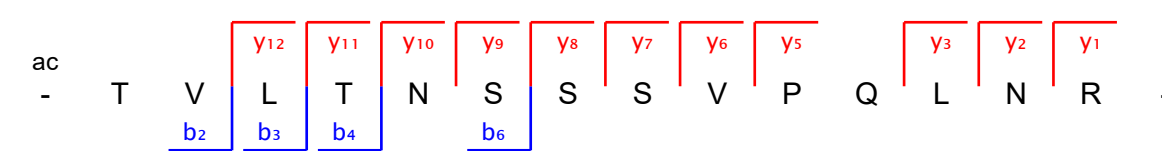

Raw file 20160713\_PS\_Scystis\_dimethyl\_Mix2\_8\_55\_fract9

Scan 35423 Method FTMS; HCD Score 57.17 m/z 593.36

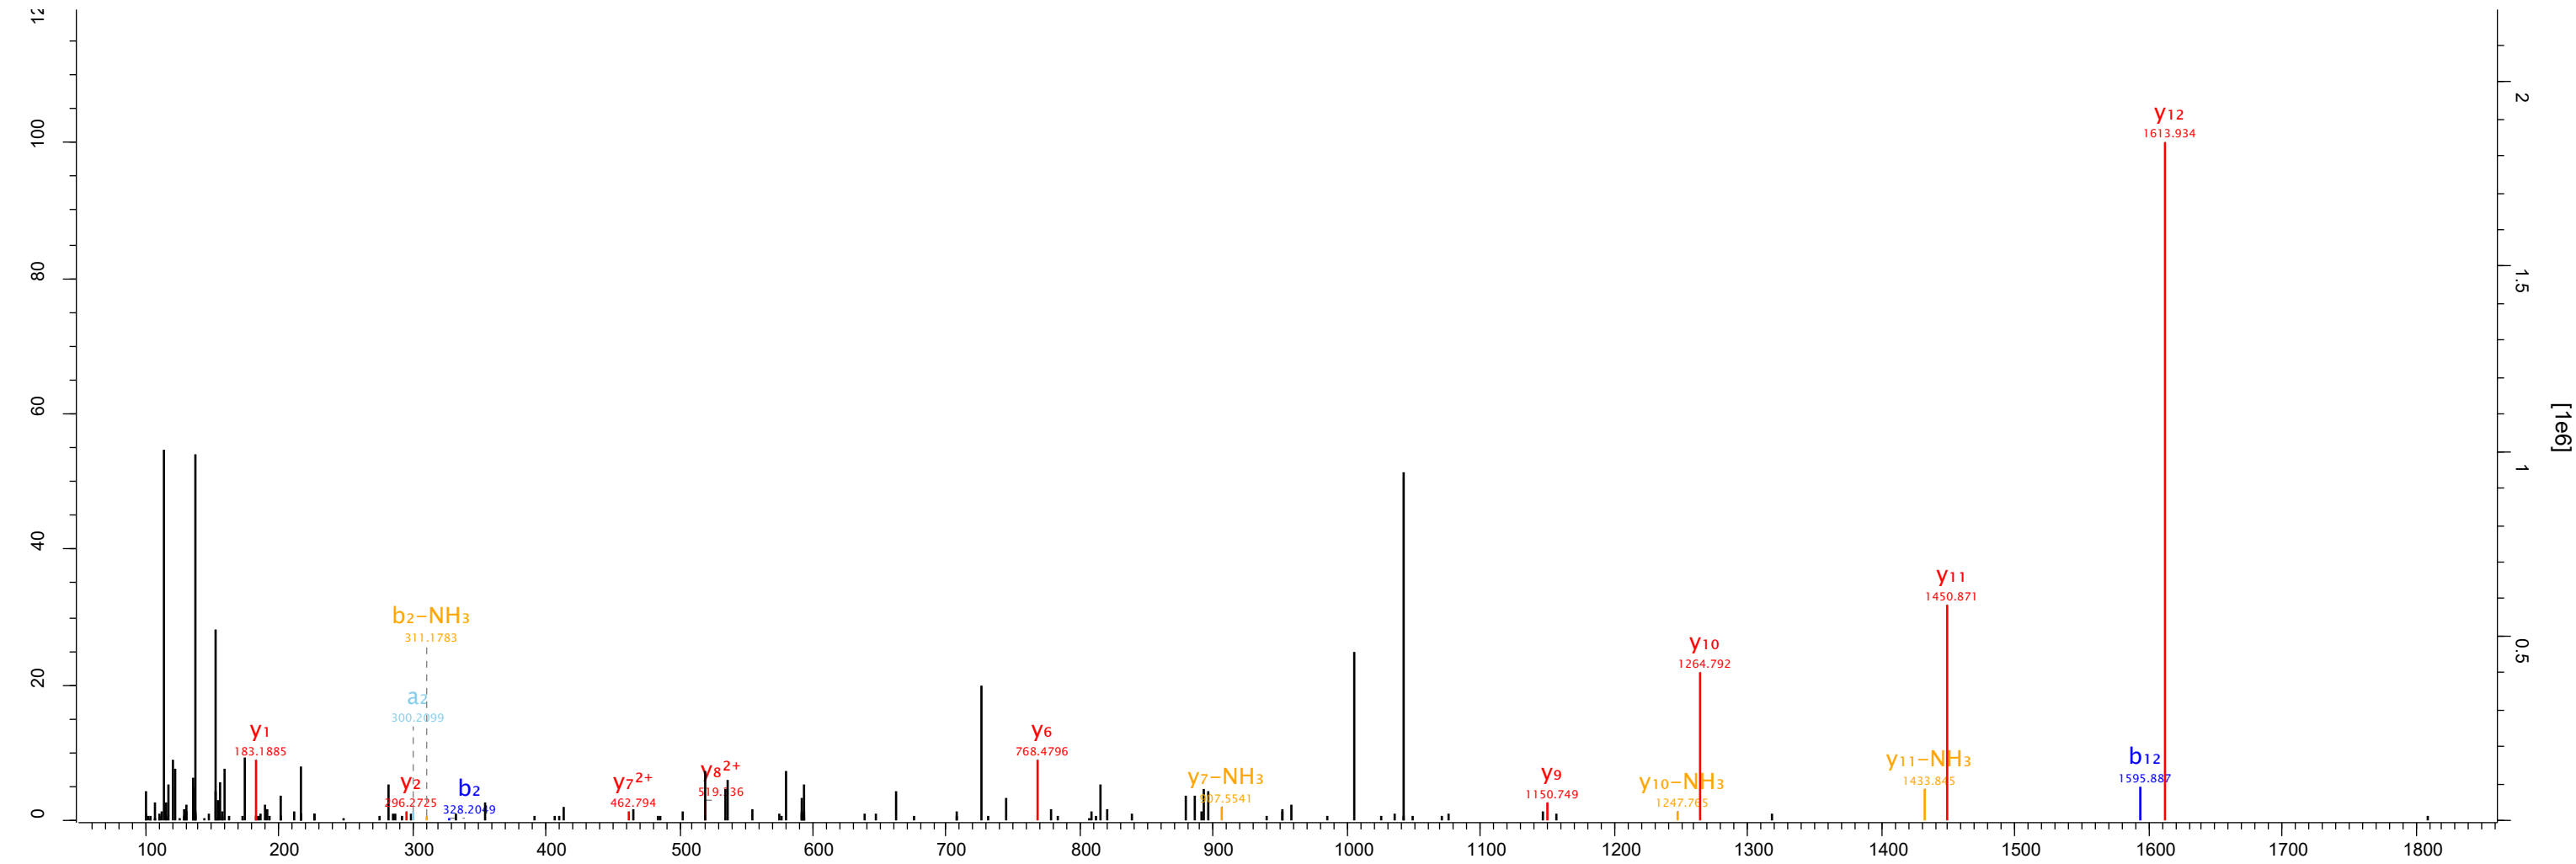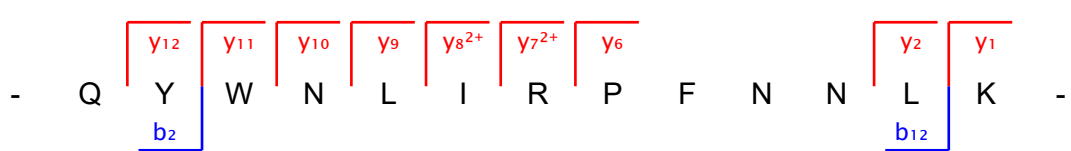

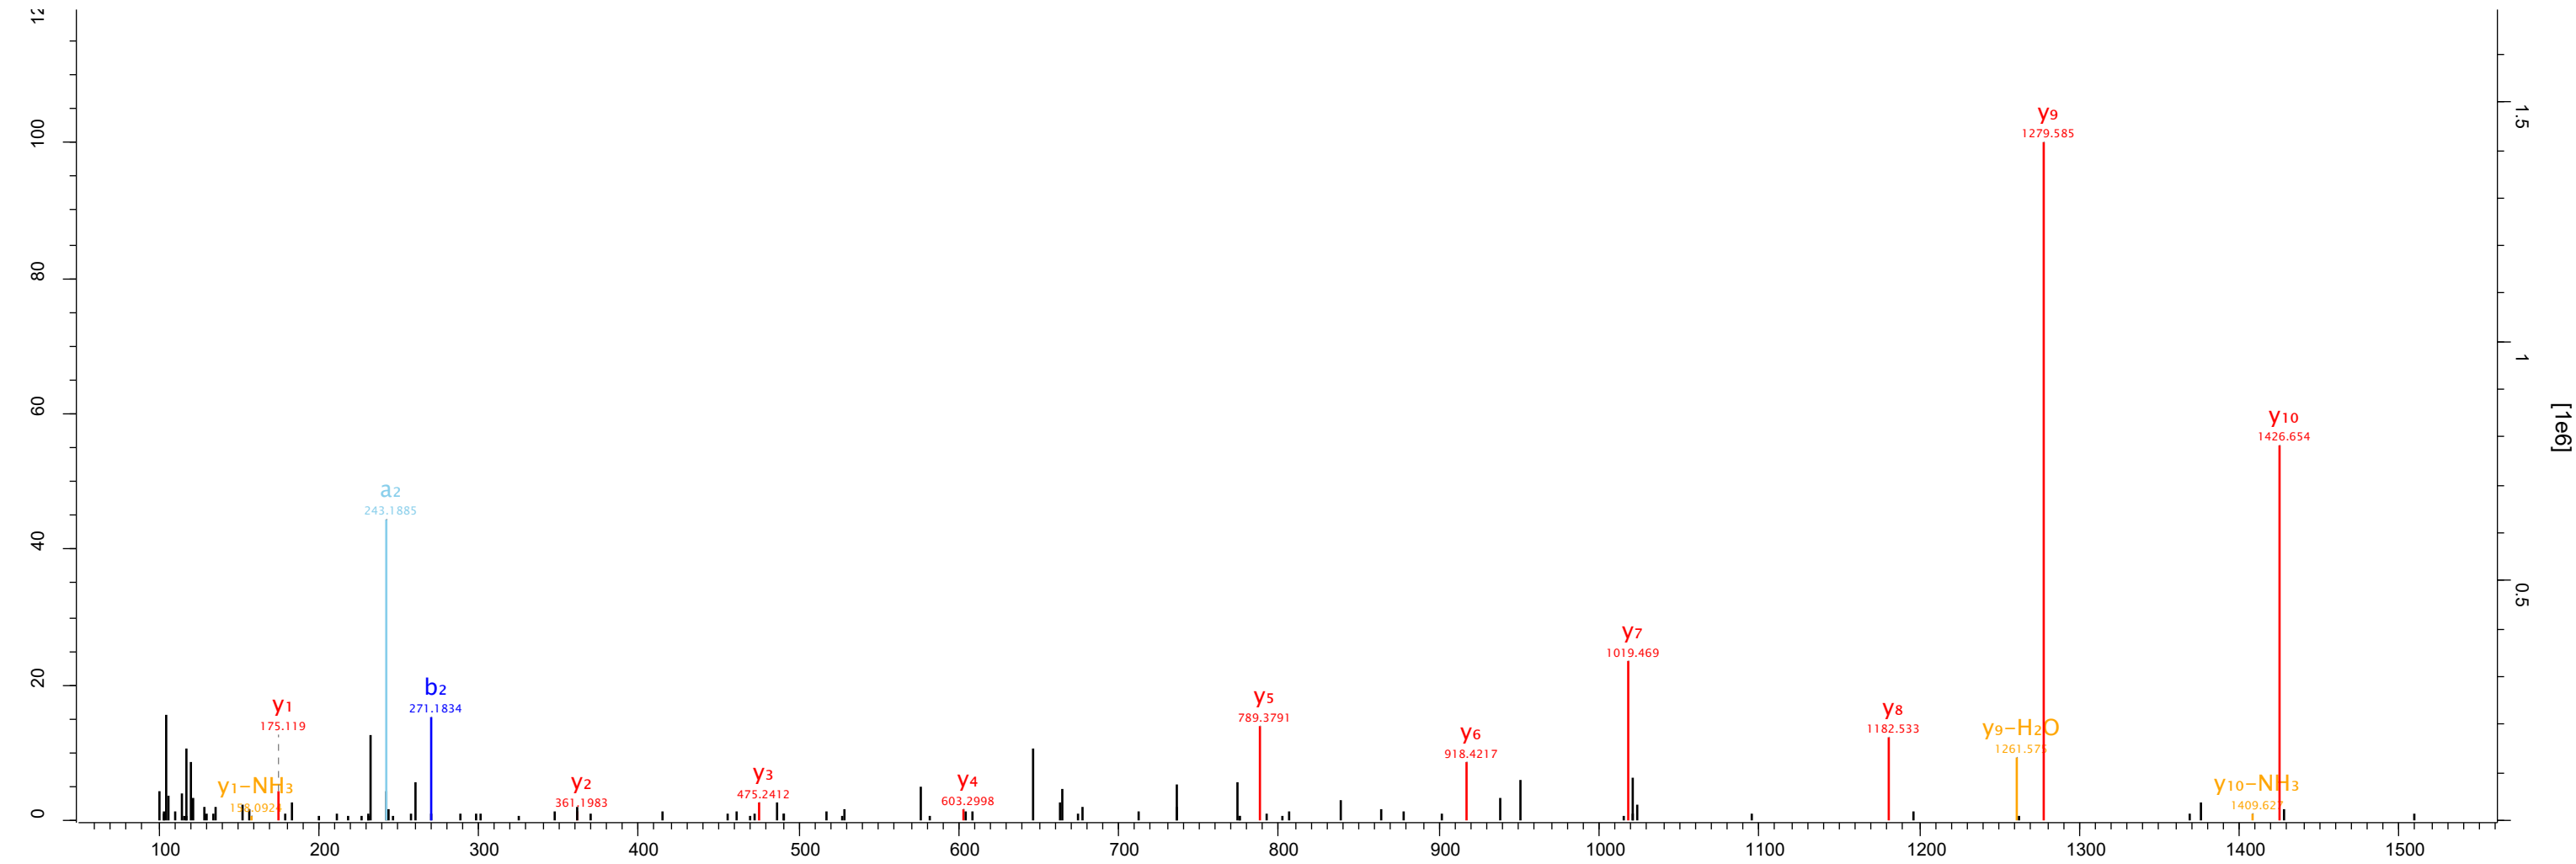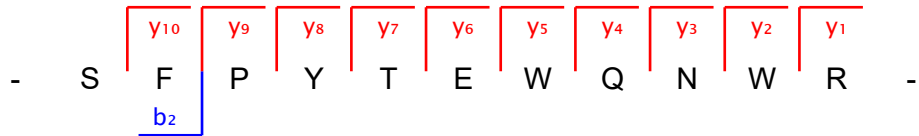

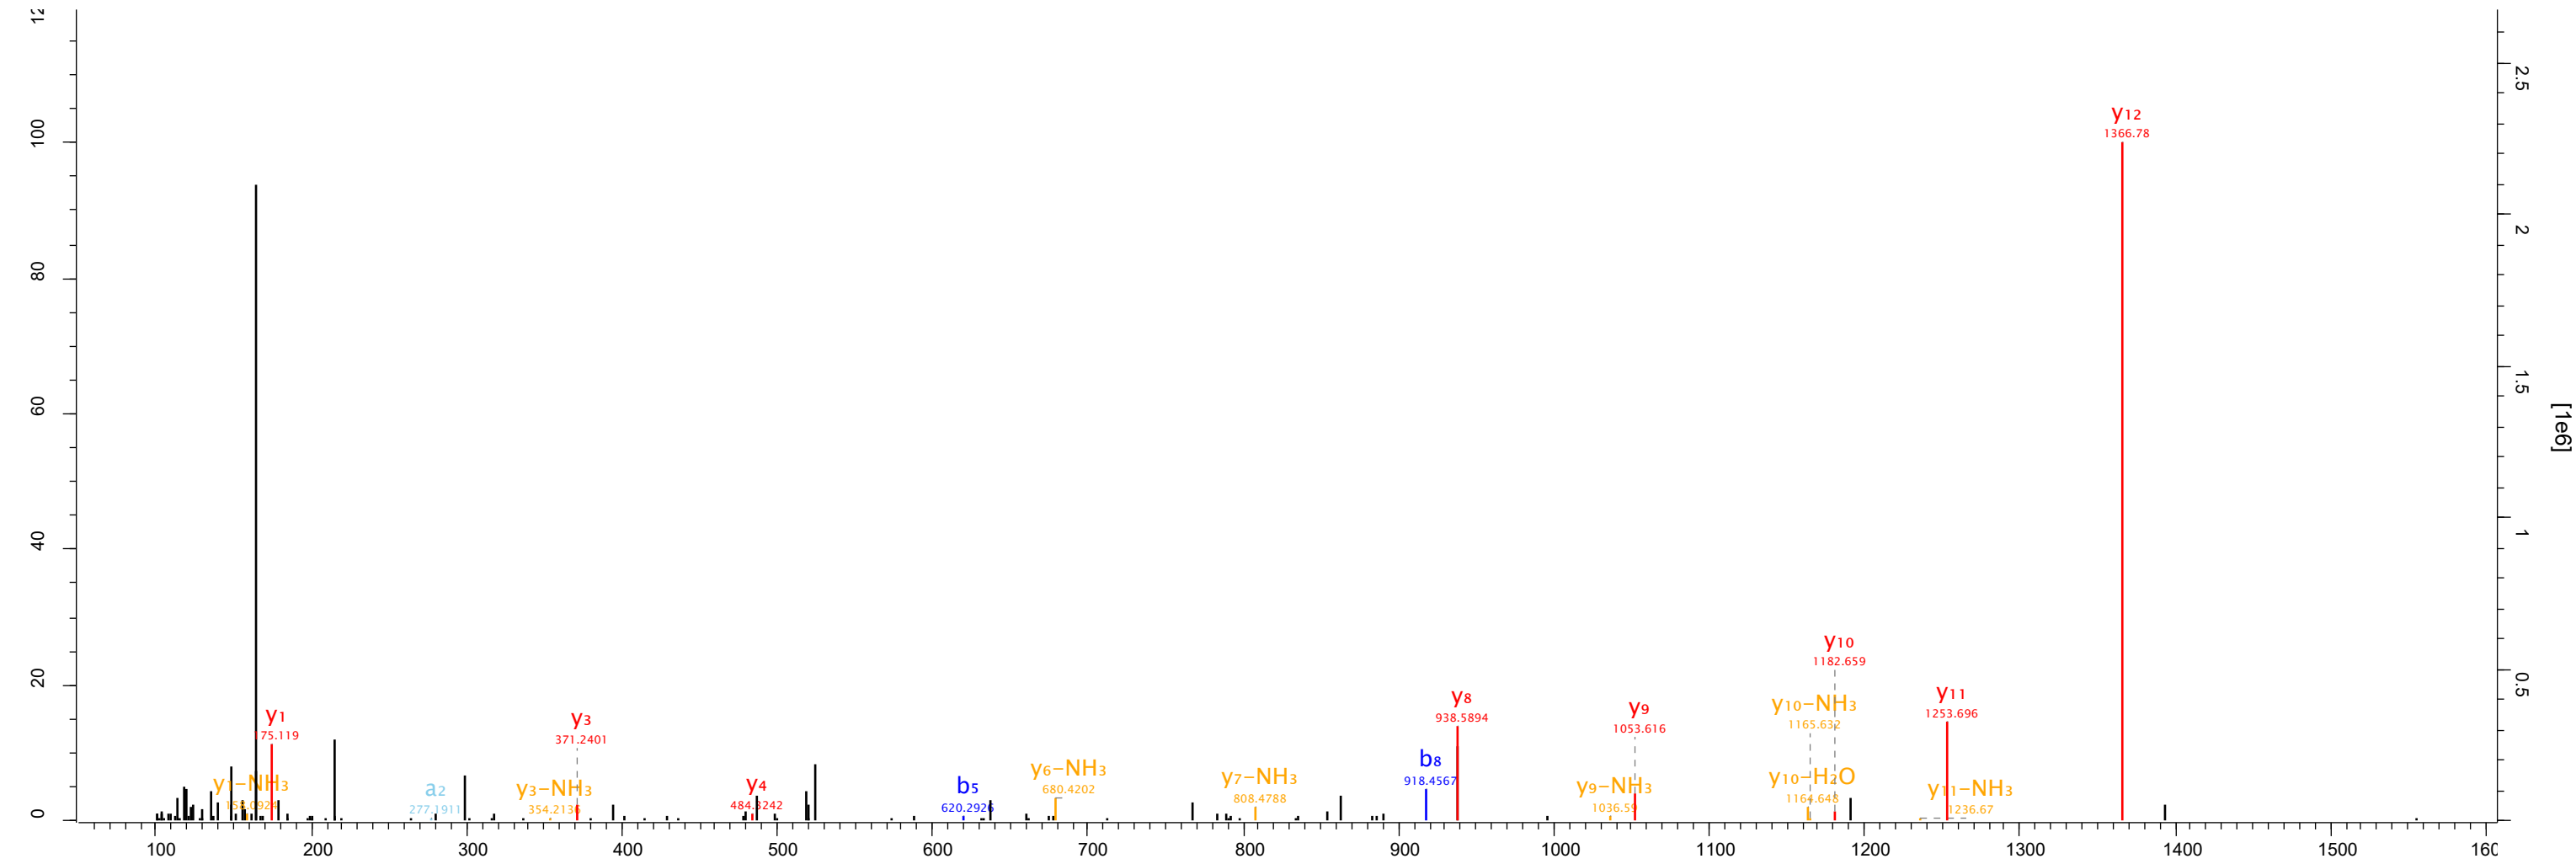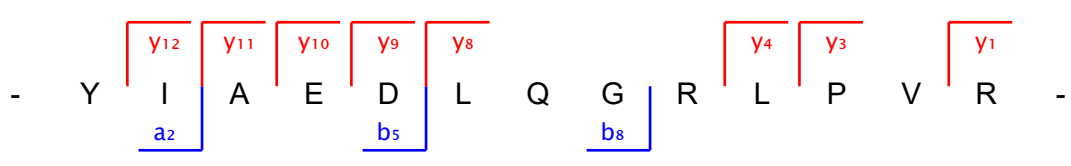

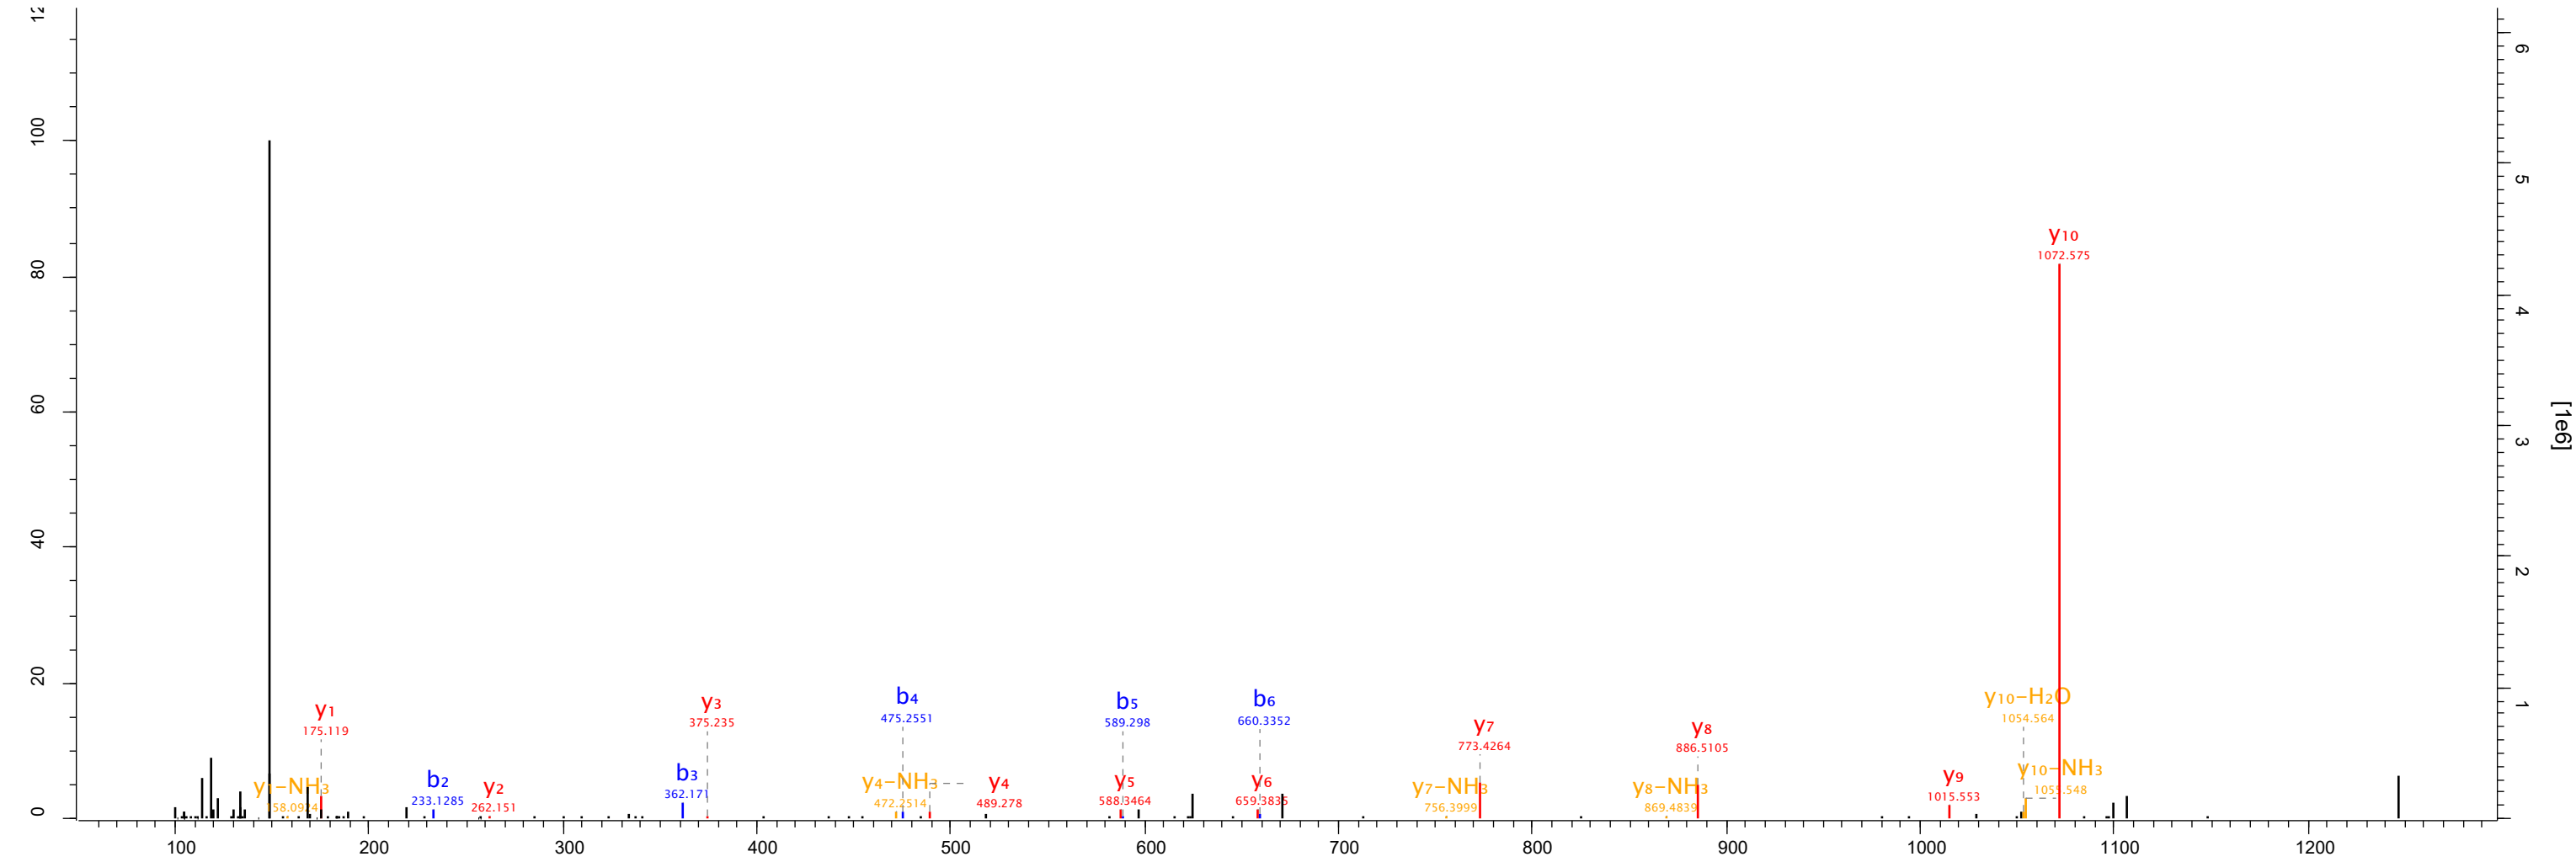

- F G E L N A V N L S R -  
b2 b3 b4 b5 b6

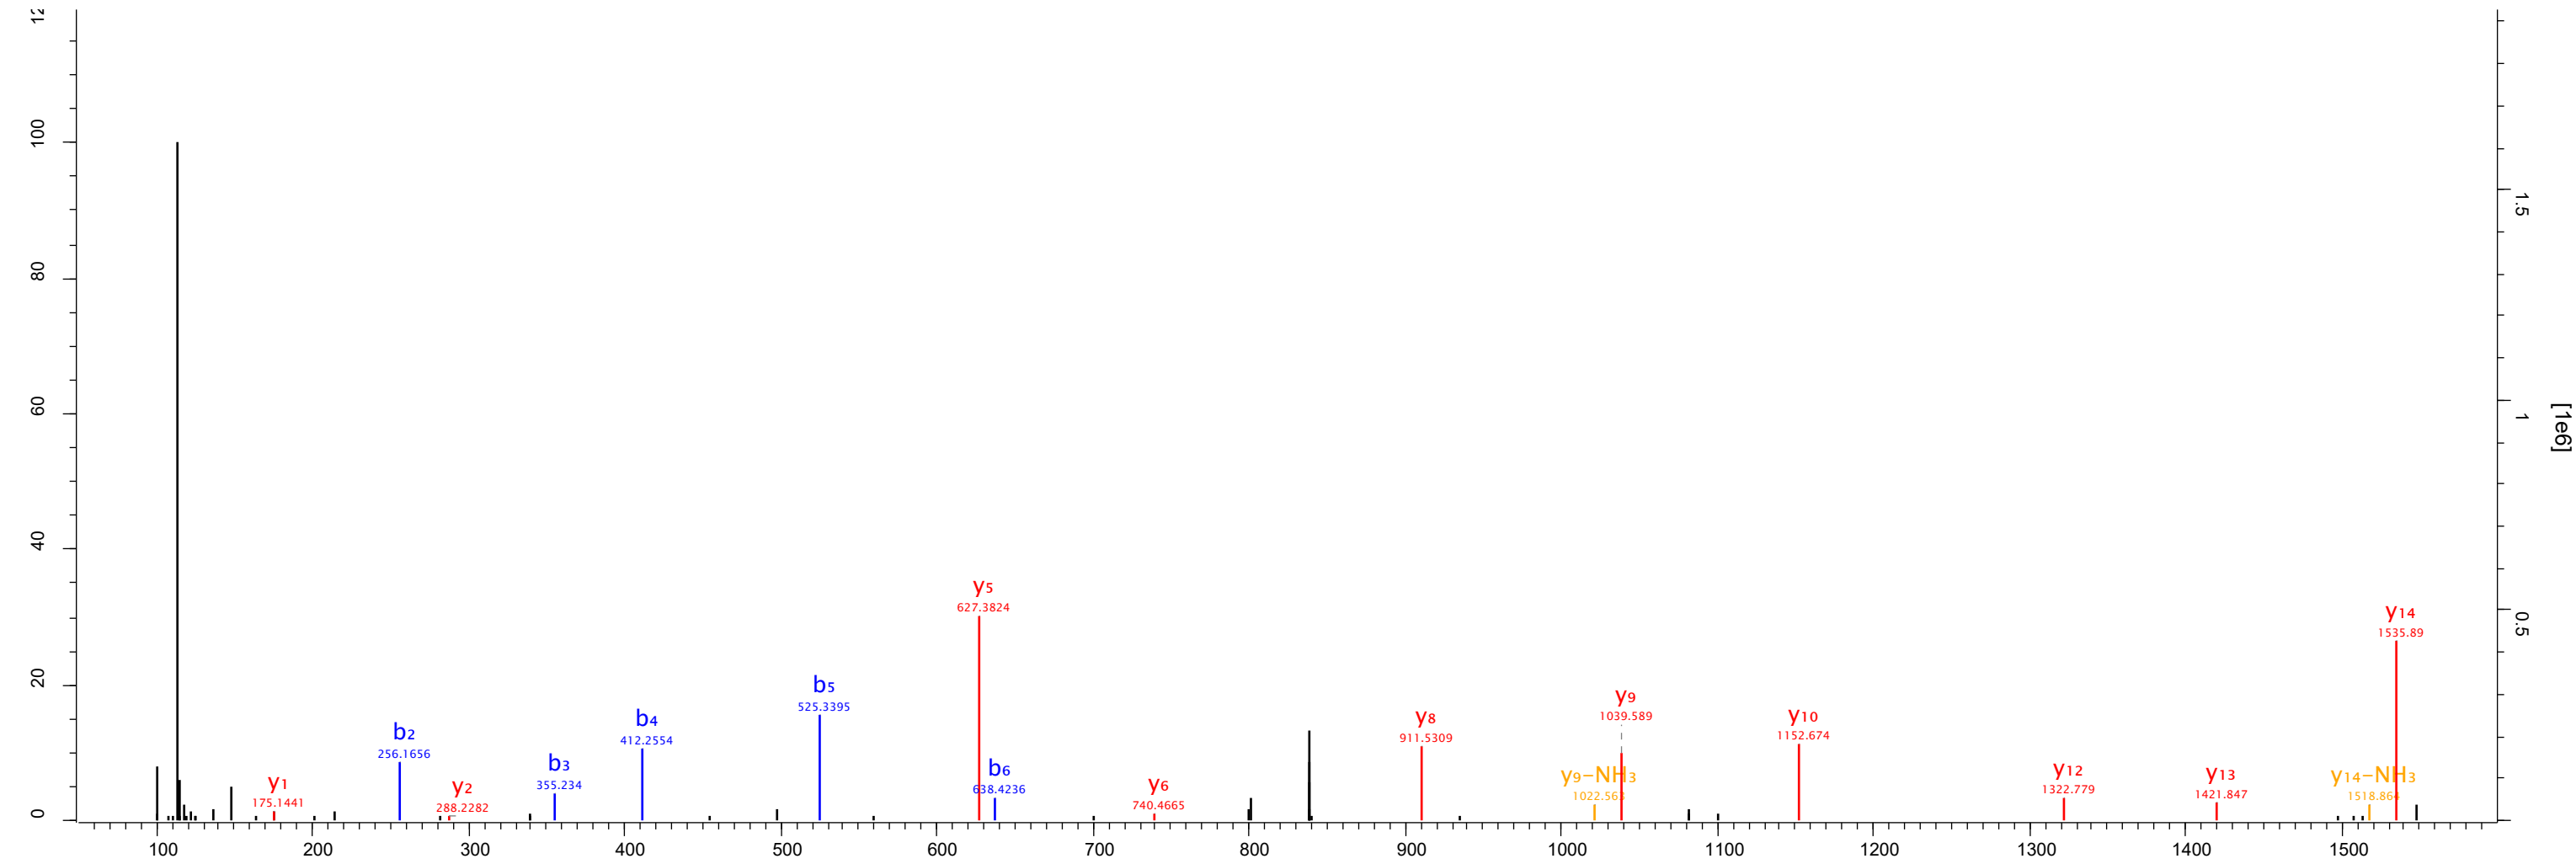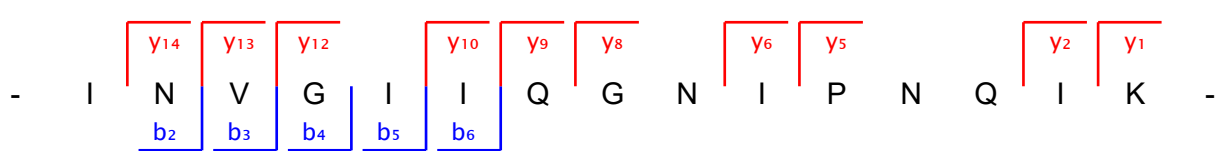

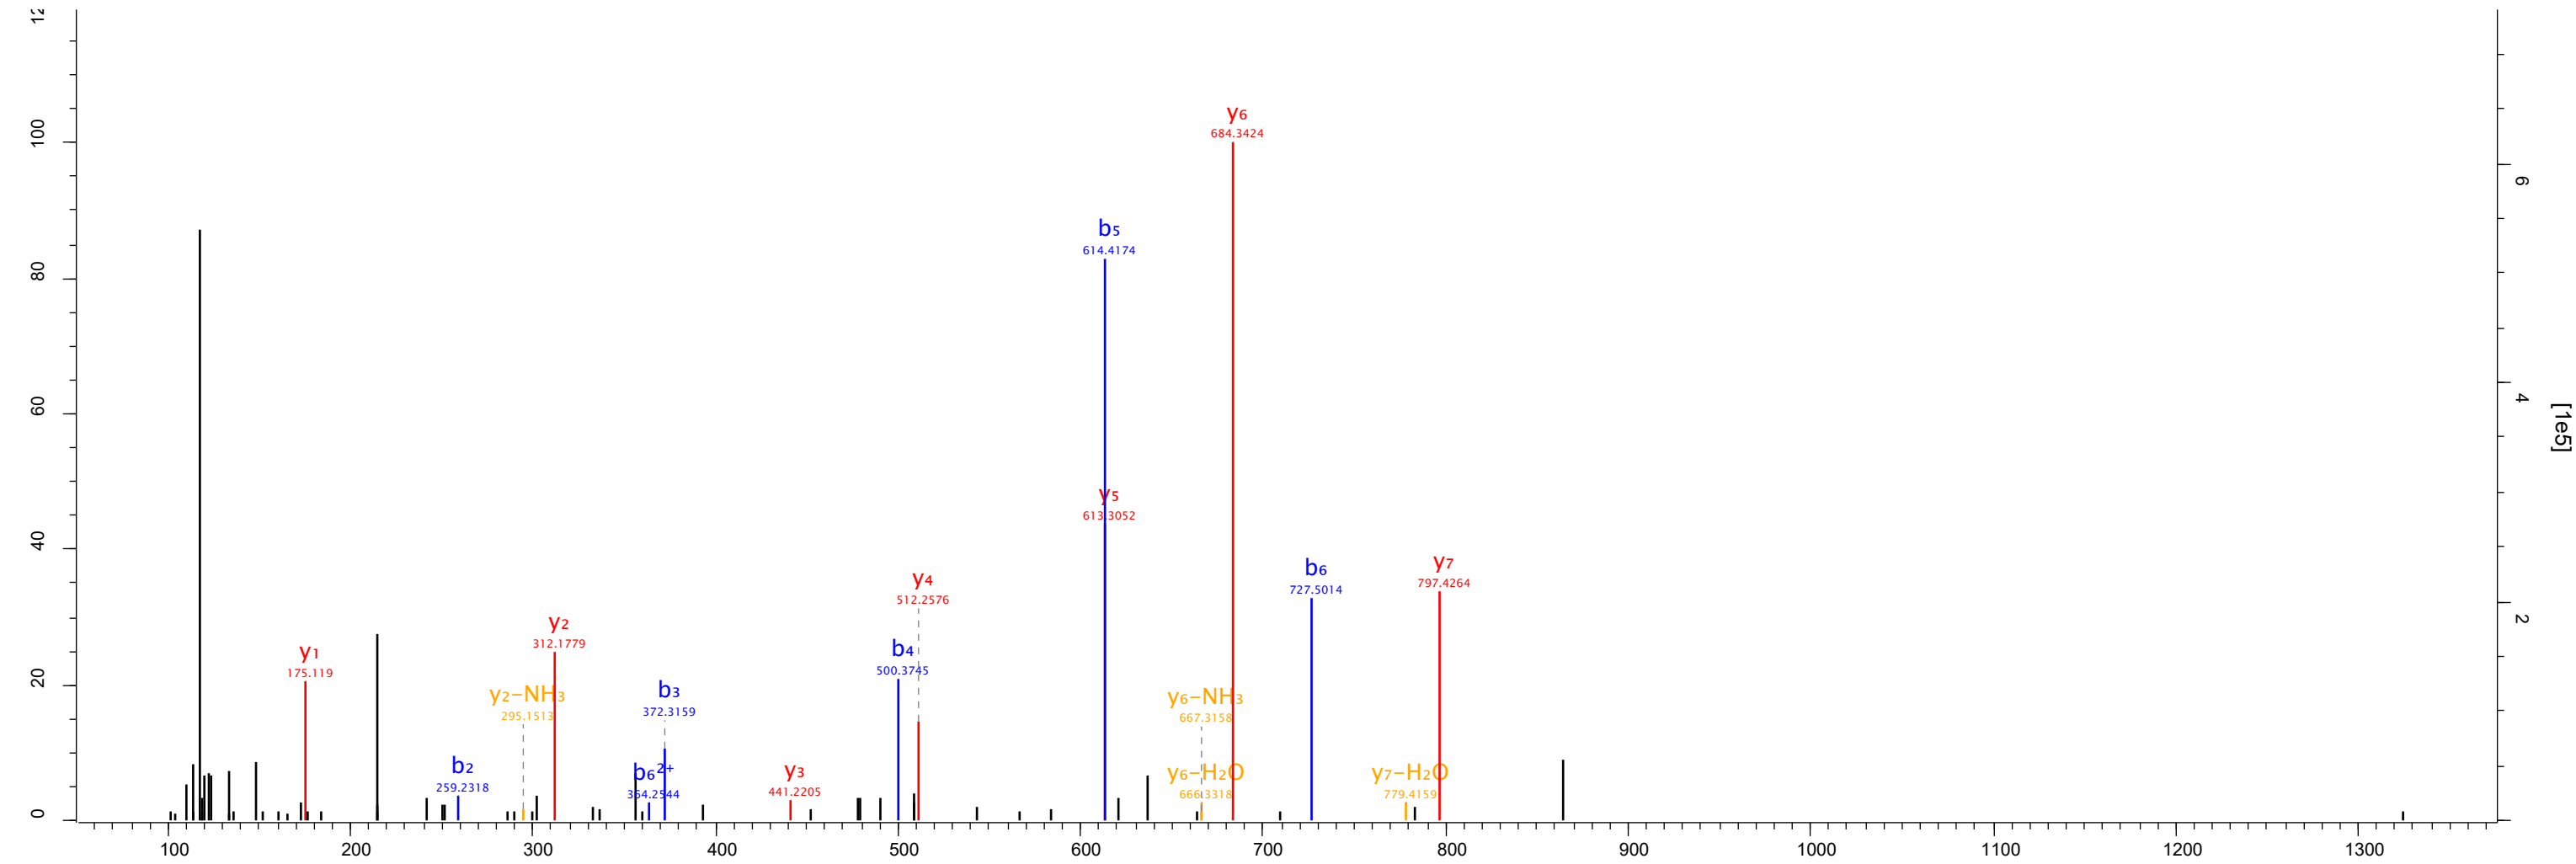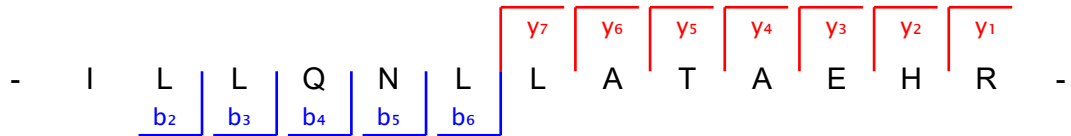



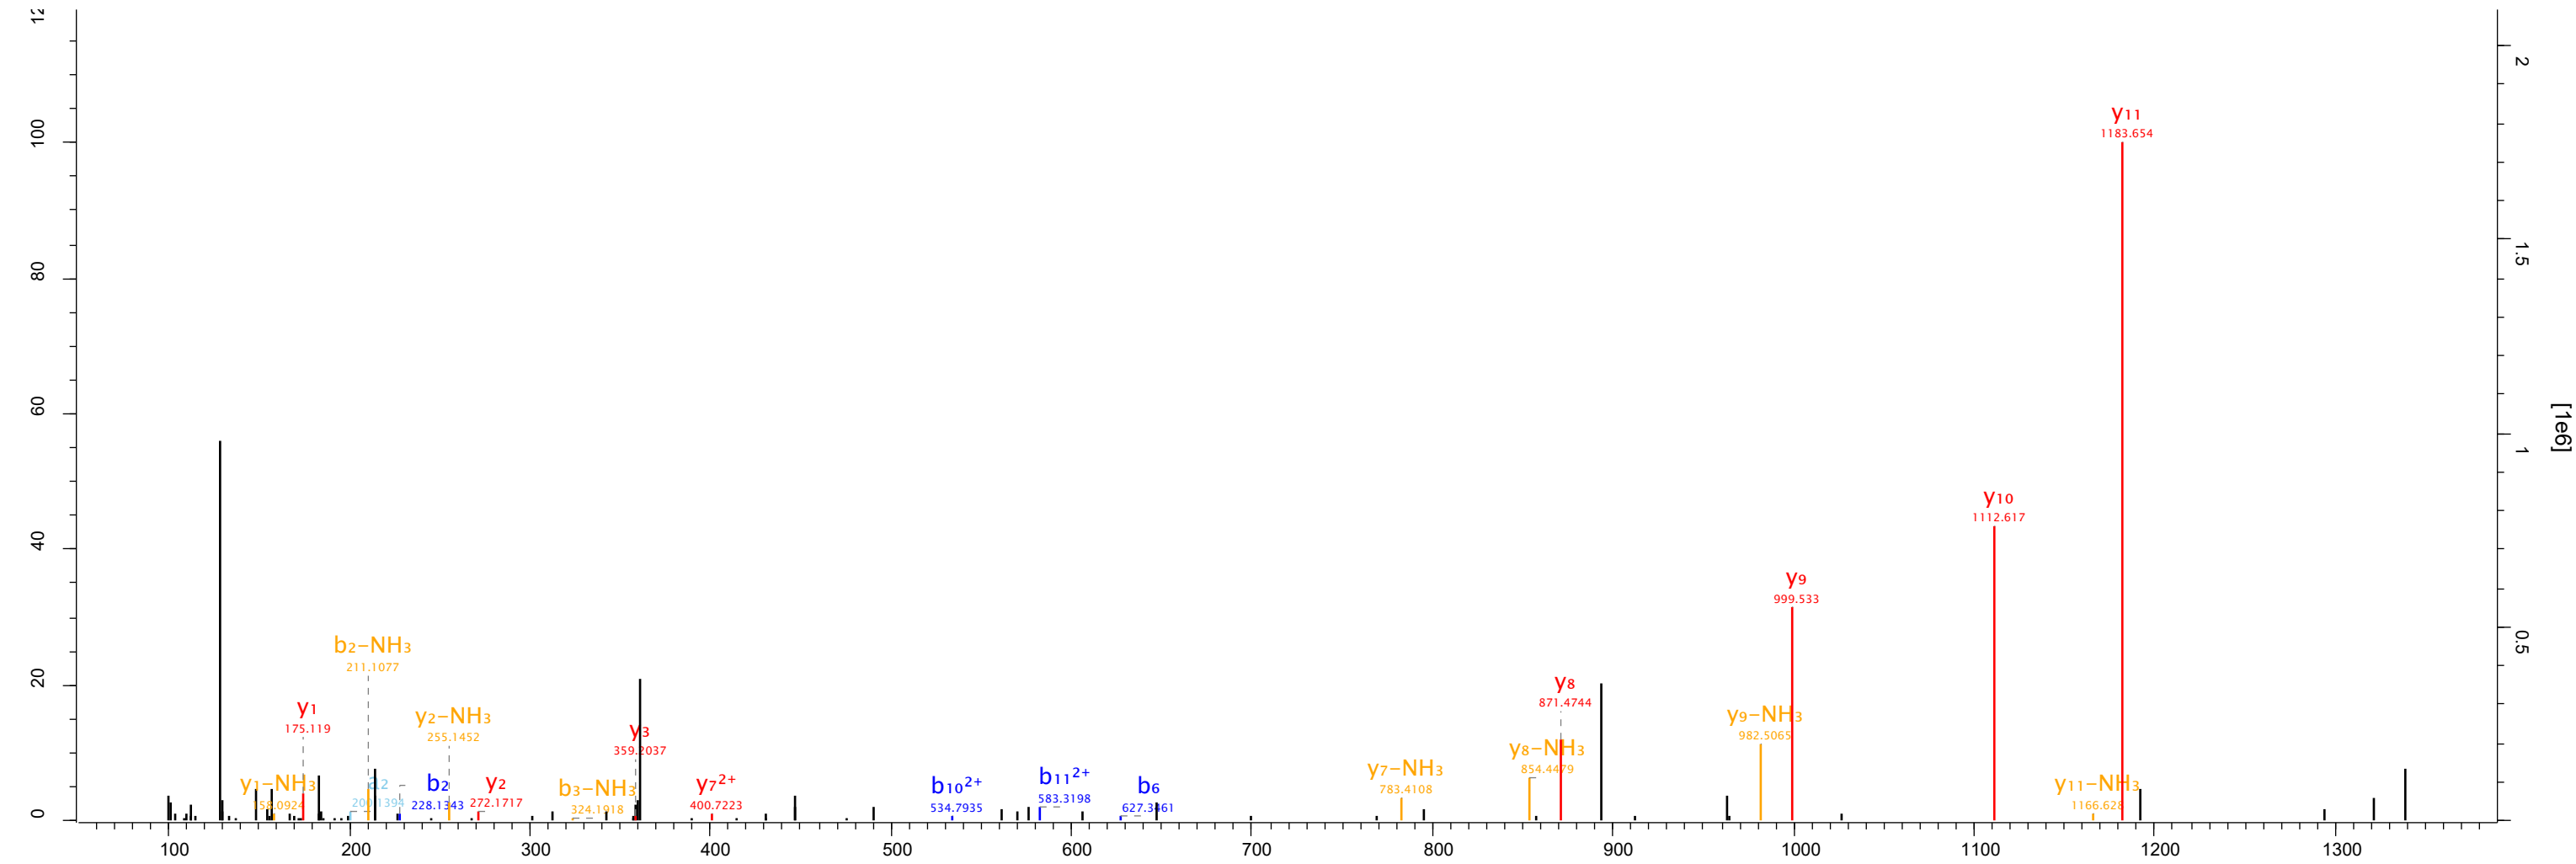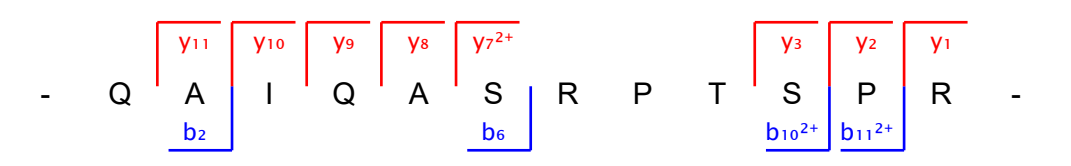

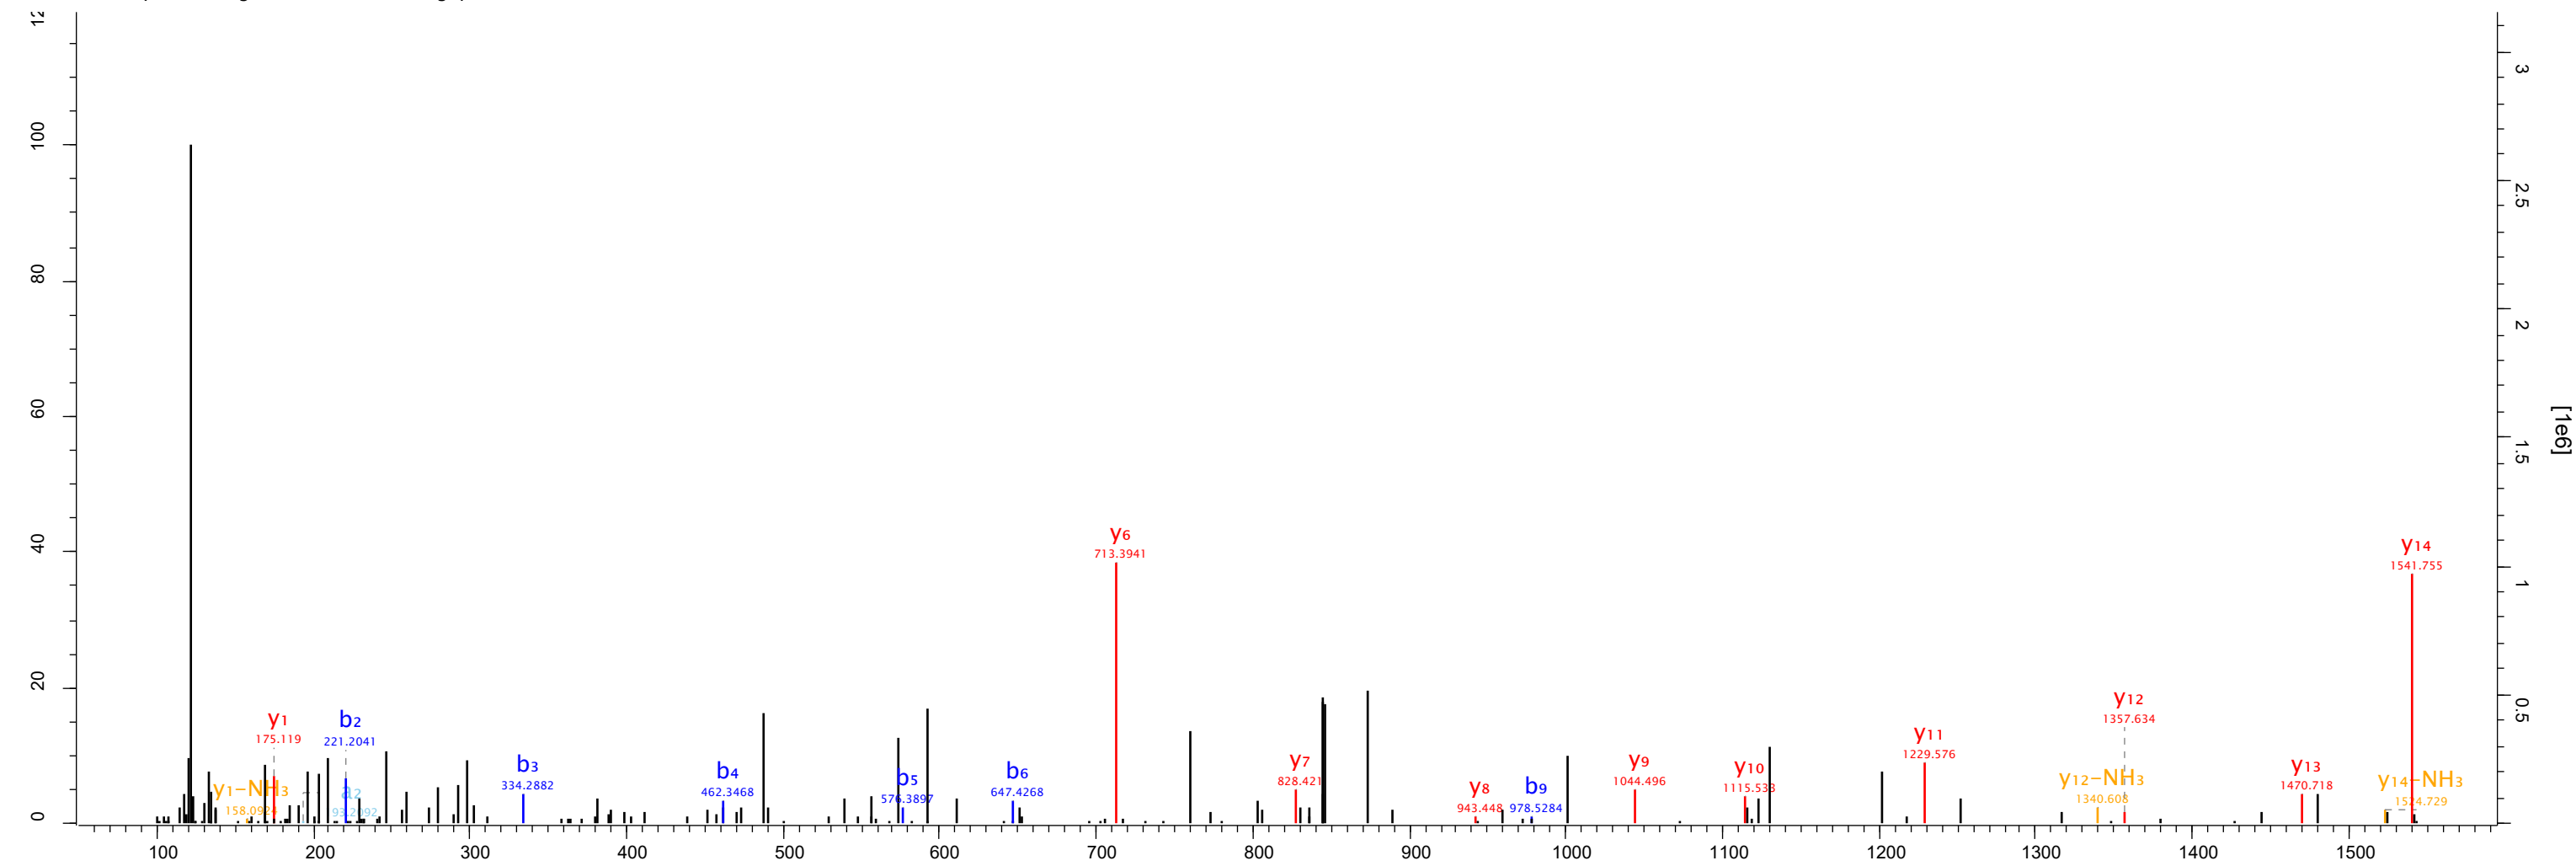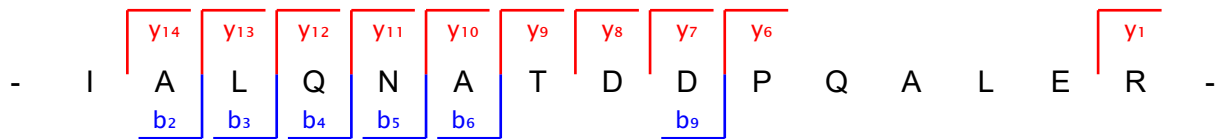

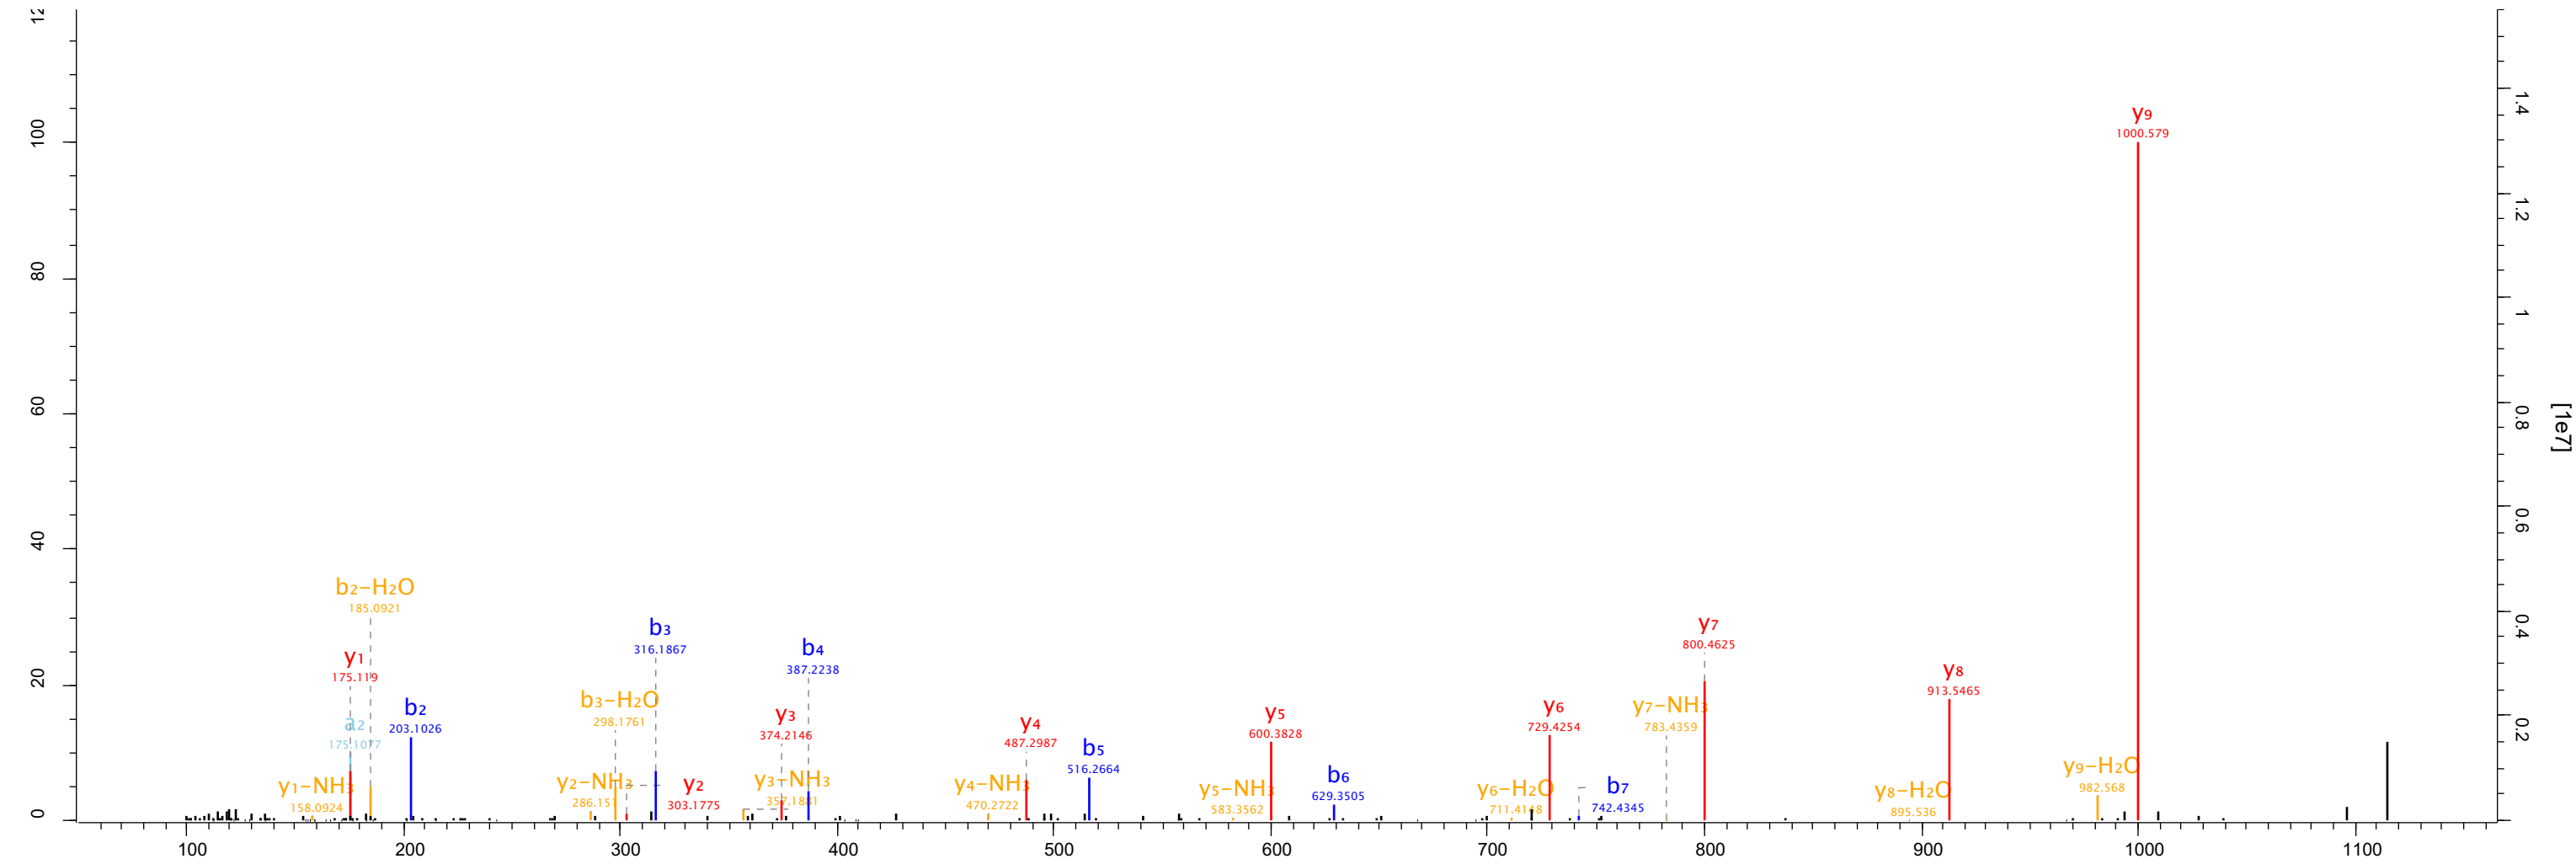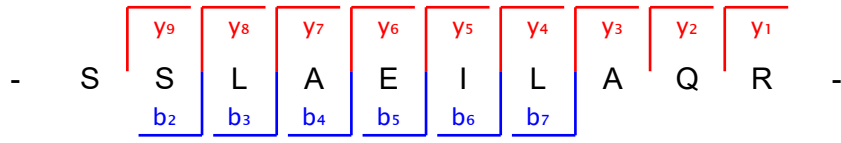

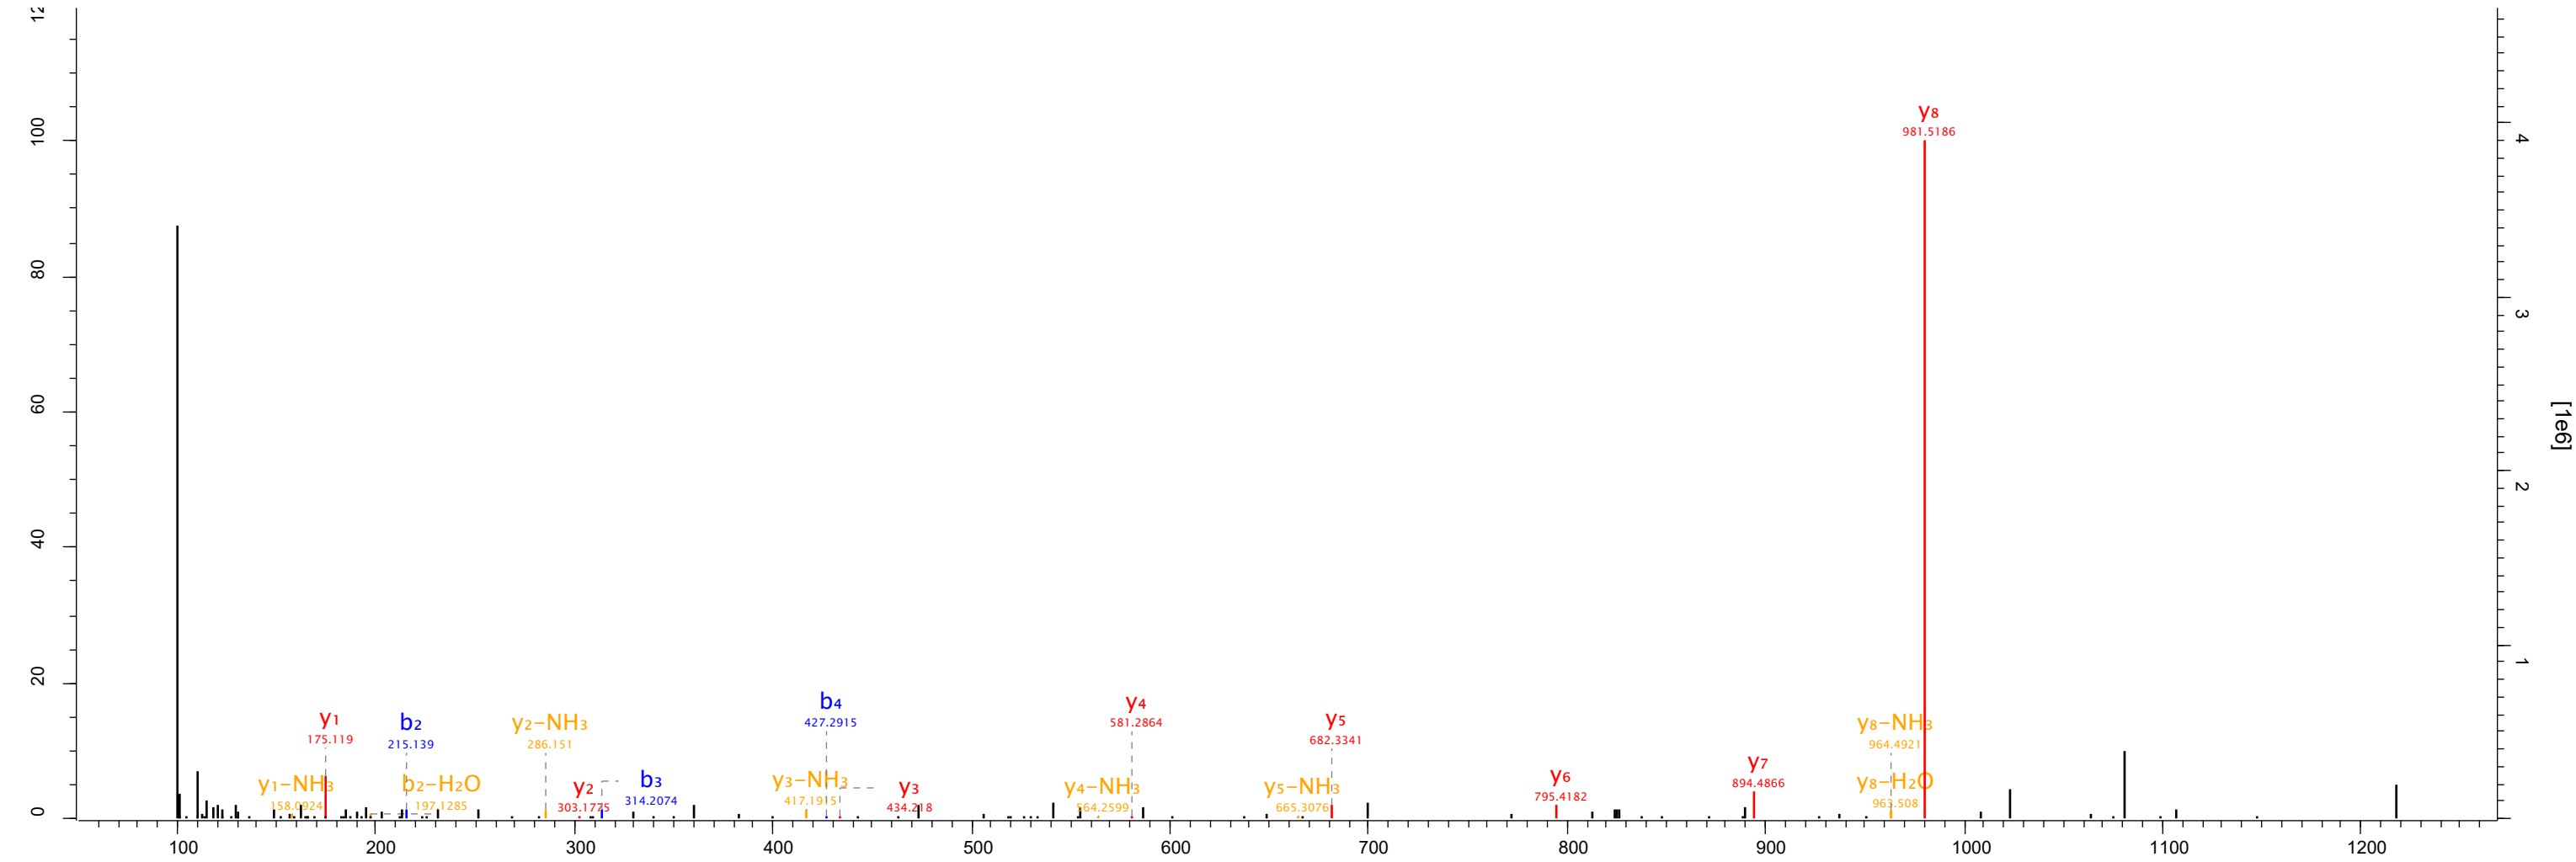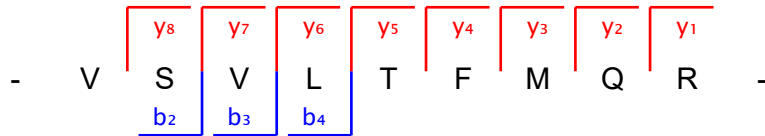

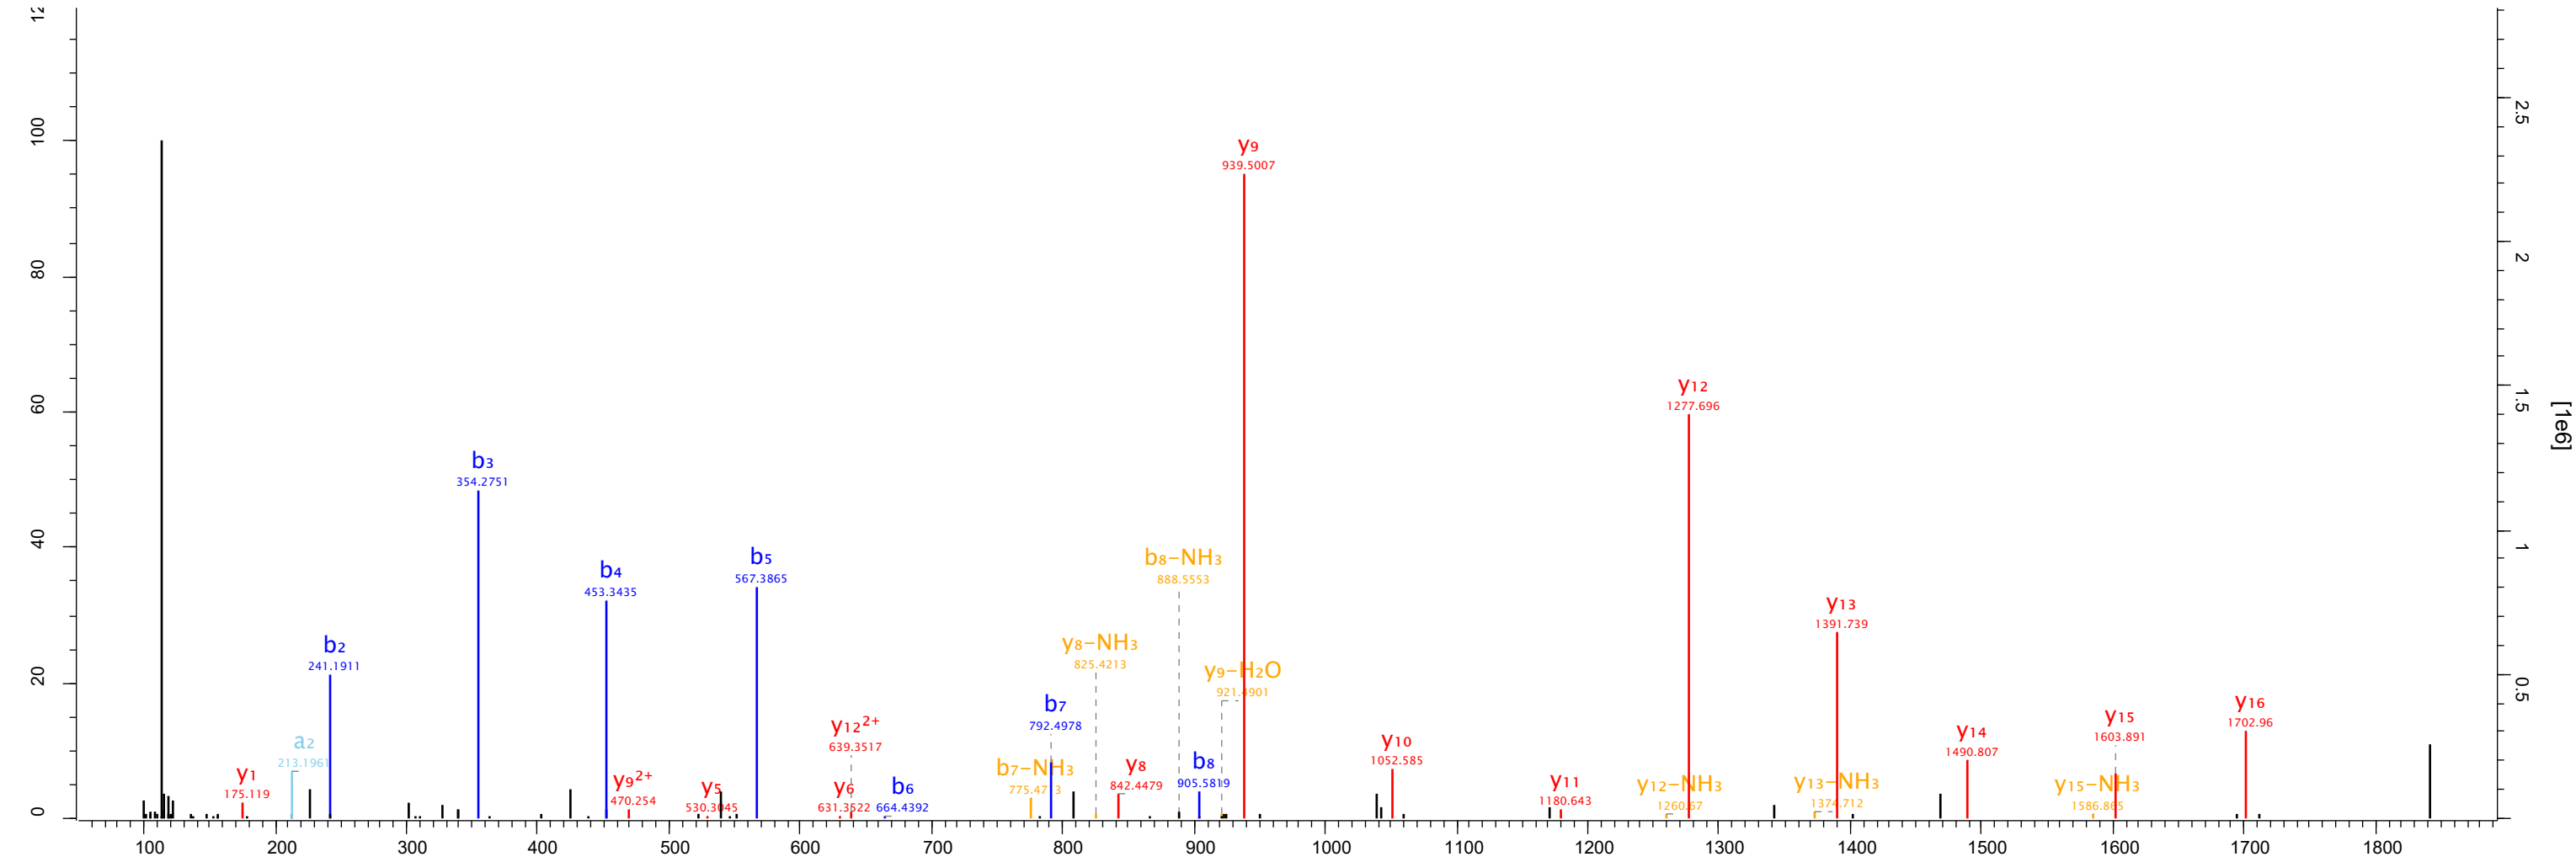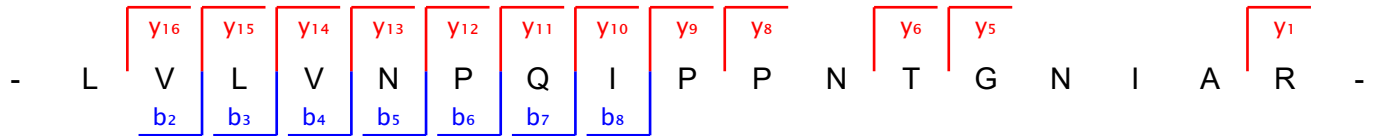

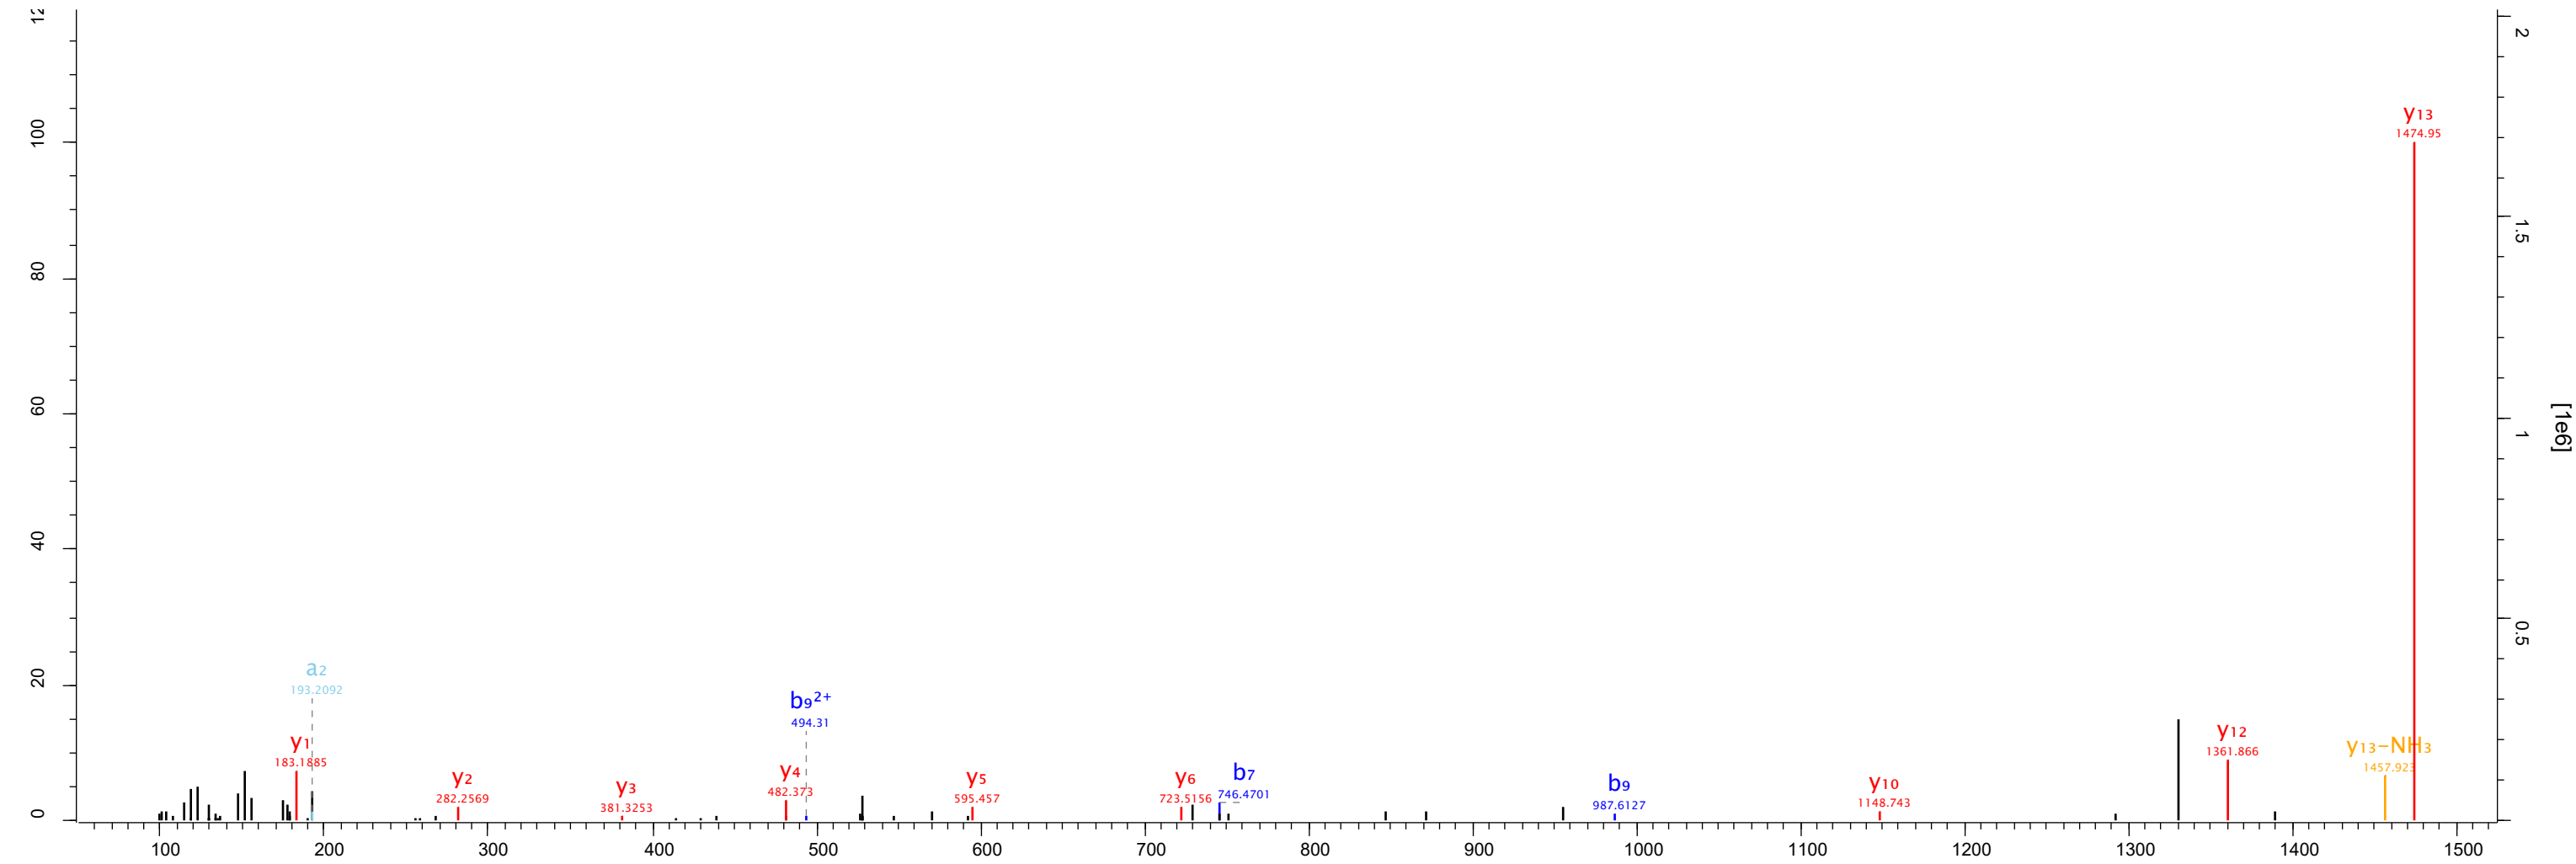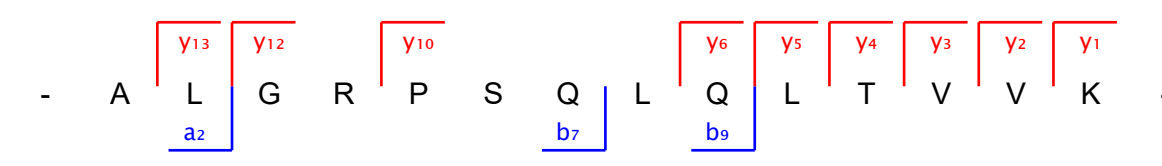

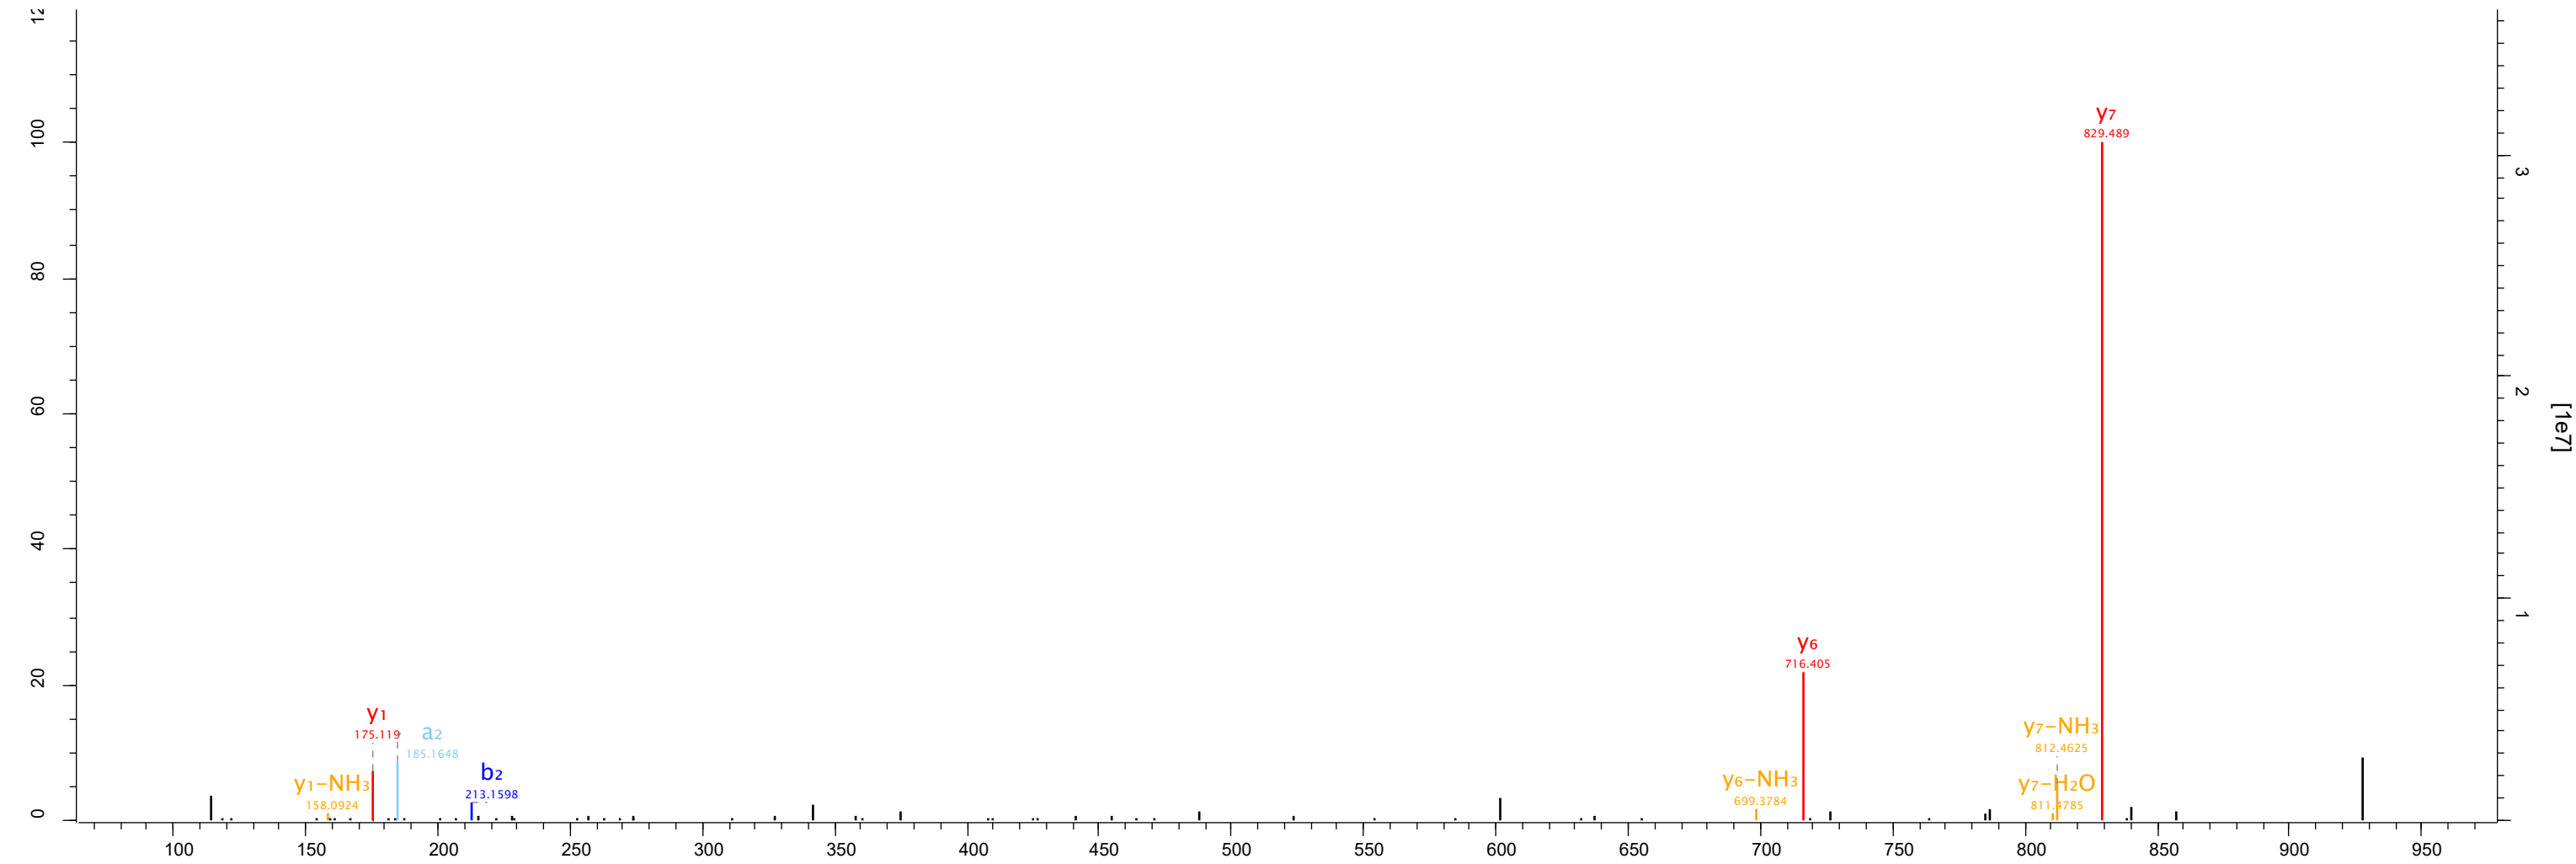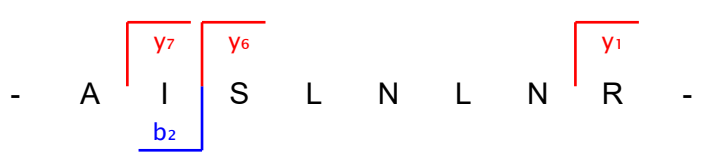

Raw file  
20160712\_PS\_Scystis\_dimethyl\_Mix0\_24\_55\_fract8

Scan 15842 Method FTMS; HCD Score 81.78 m/z 424.75

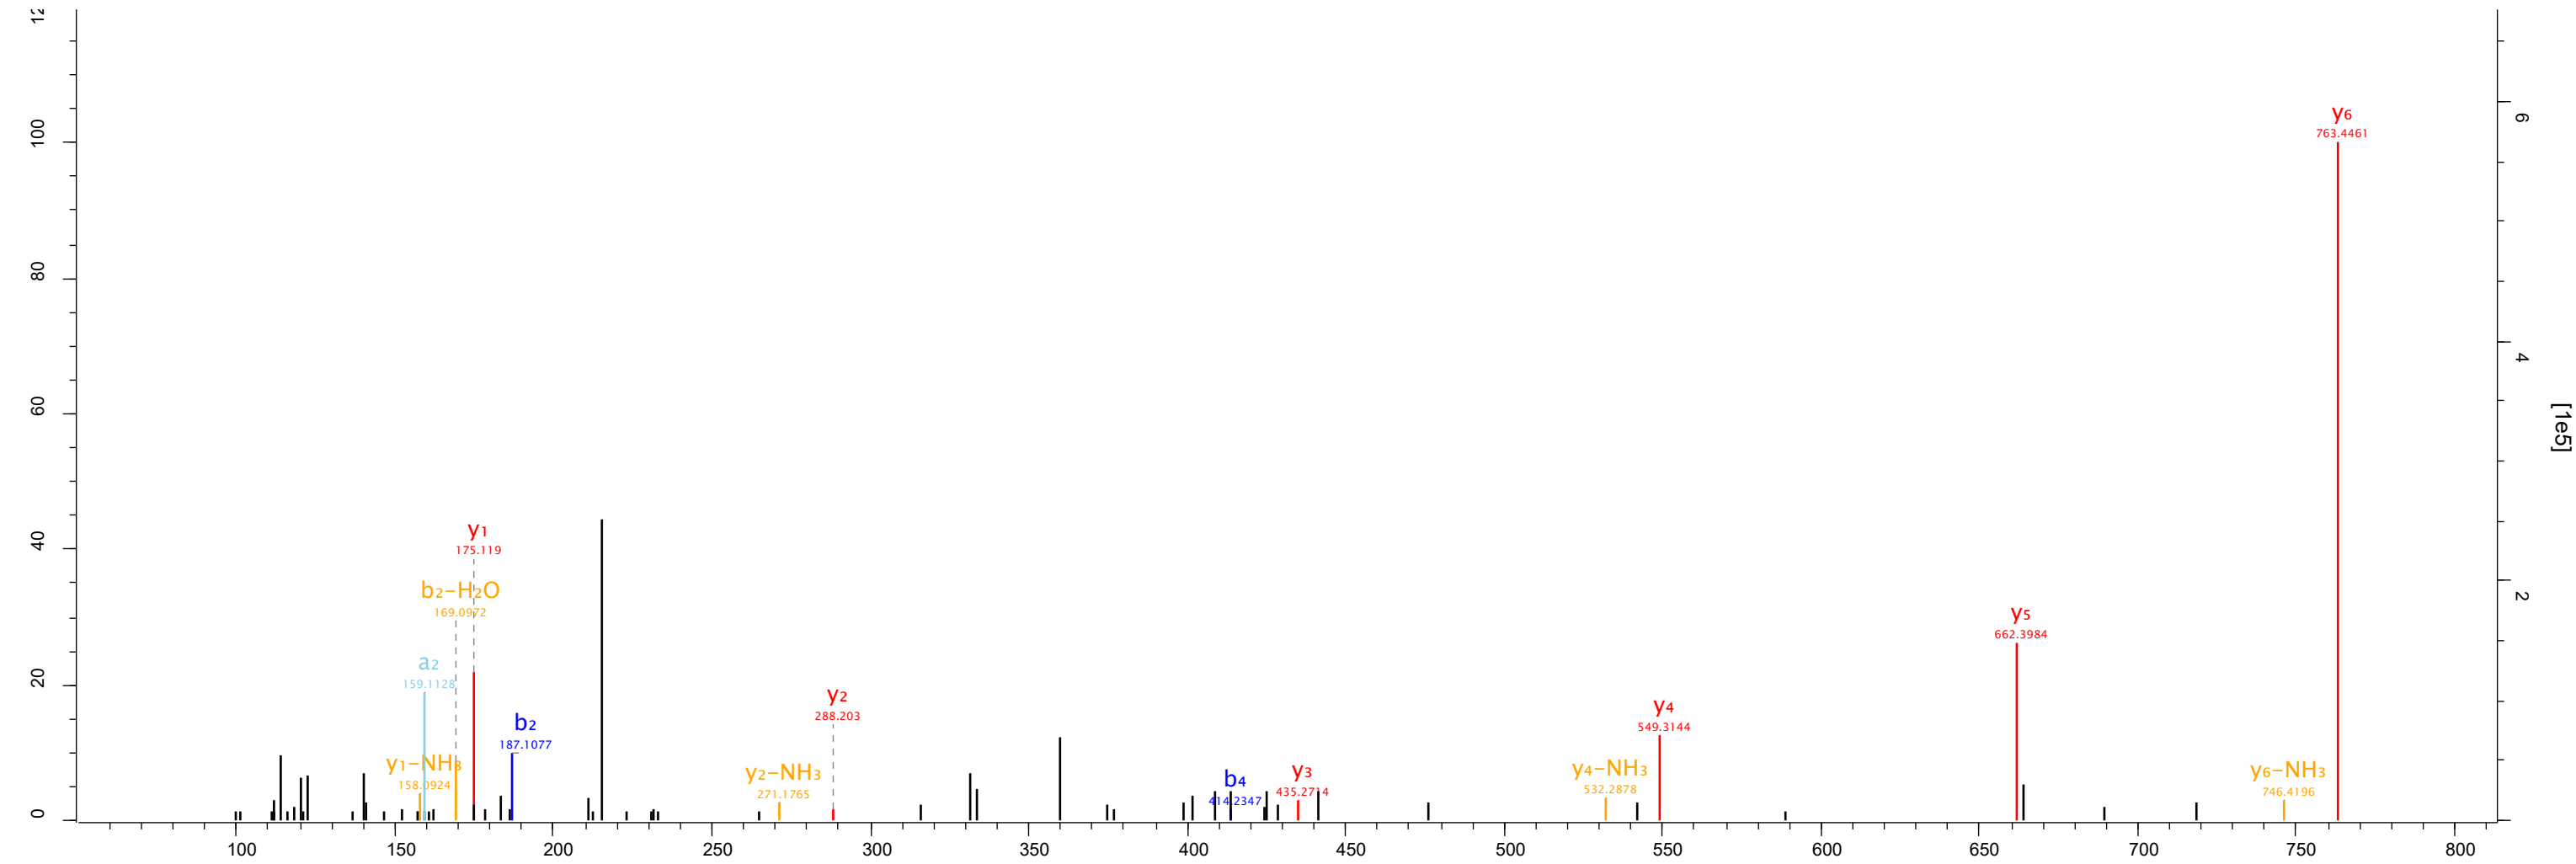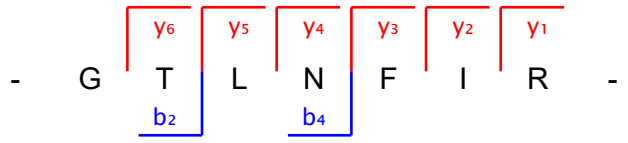



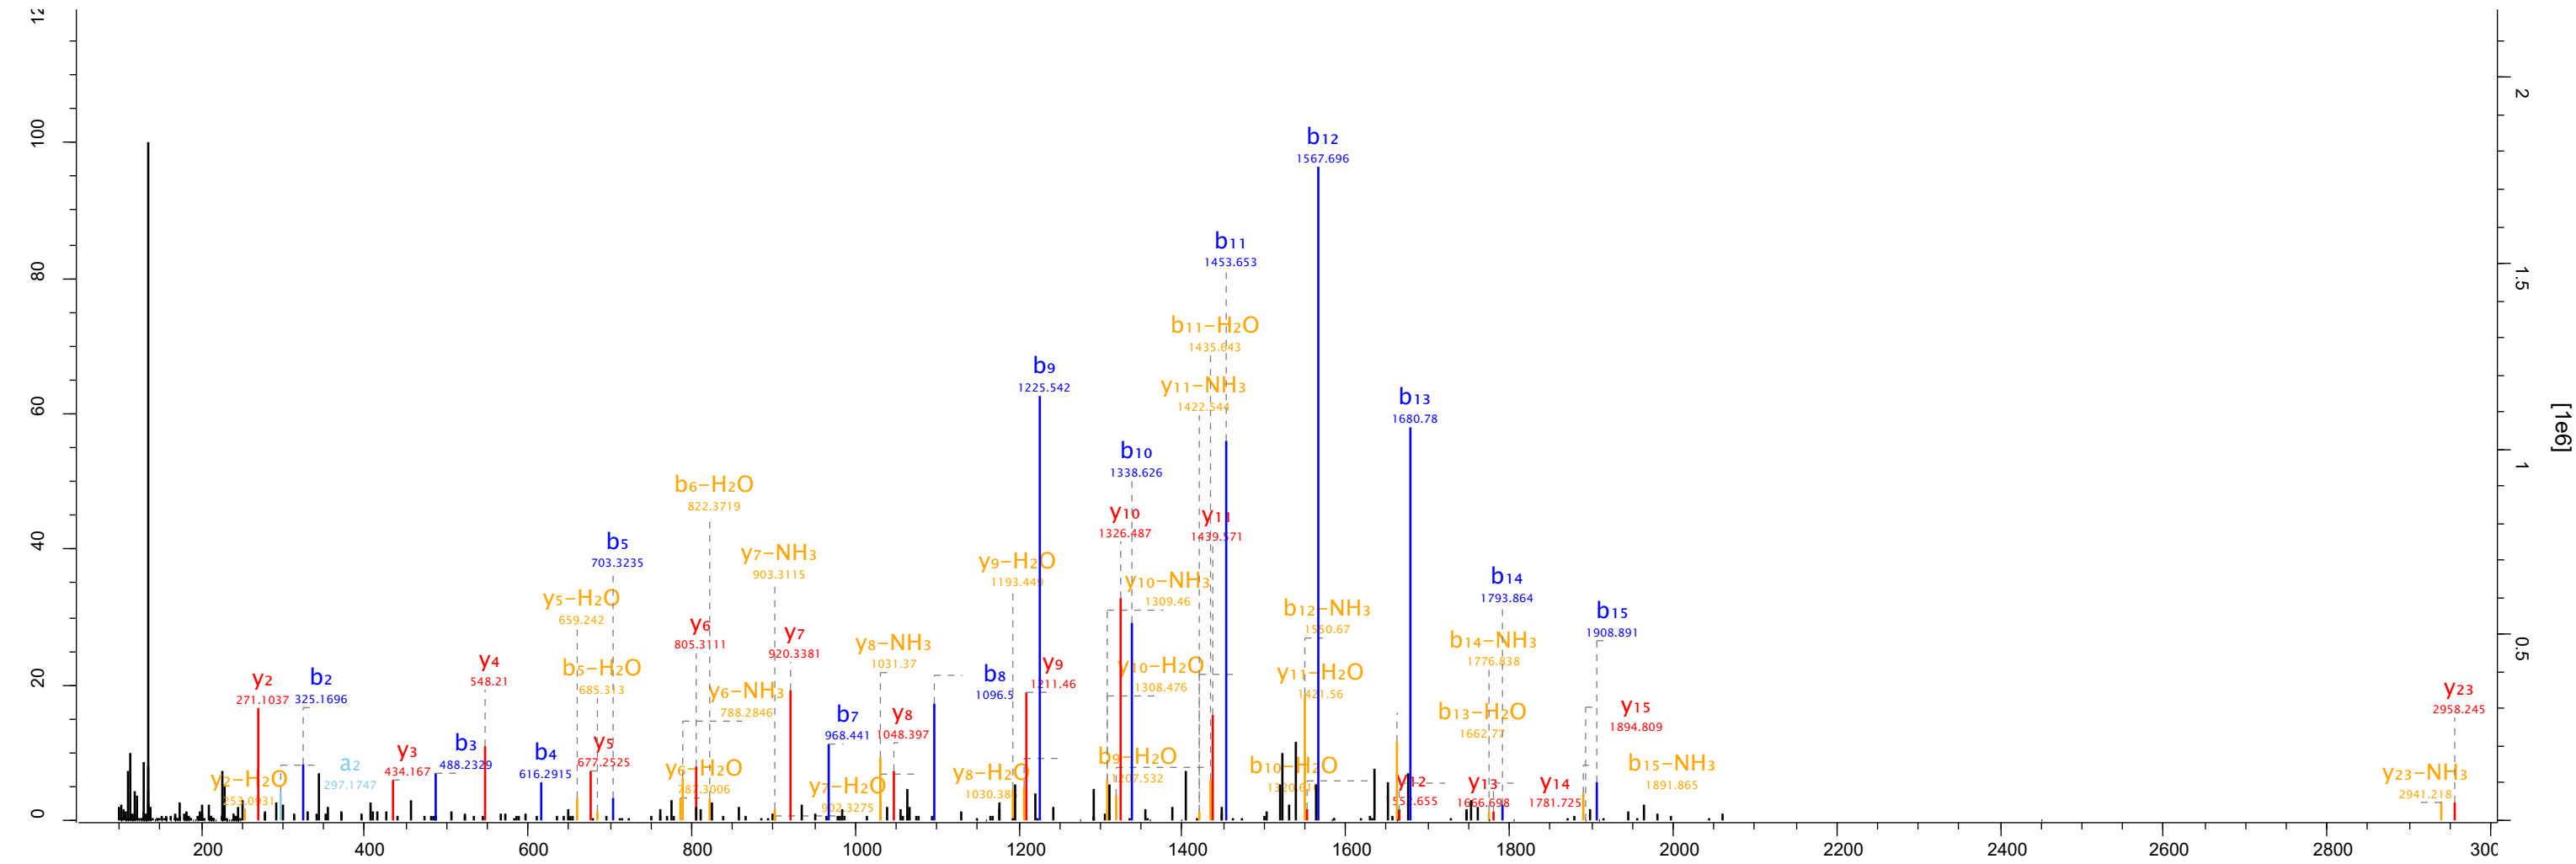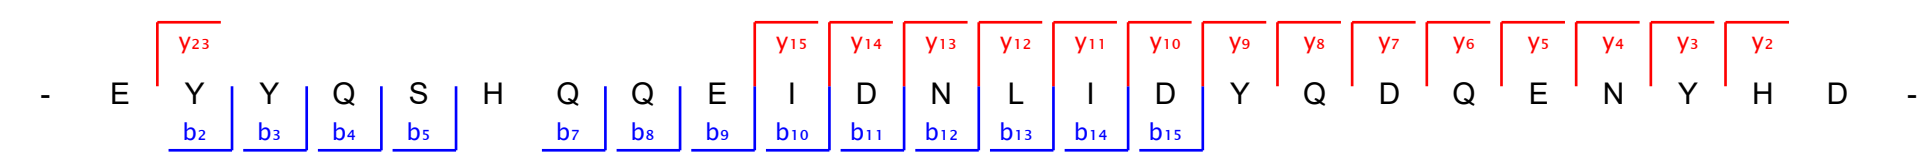

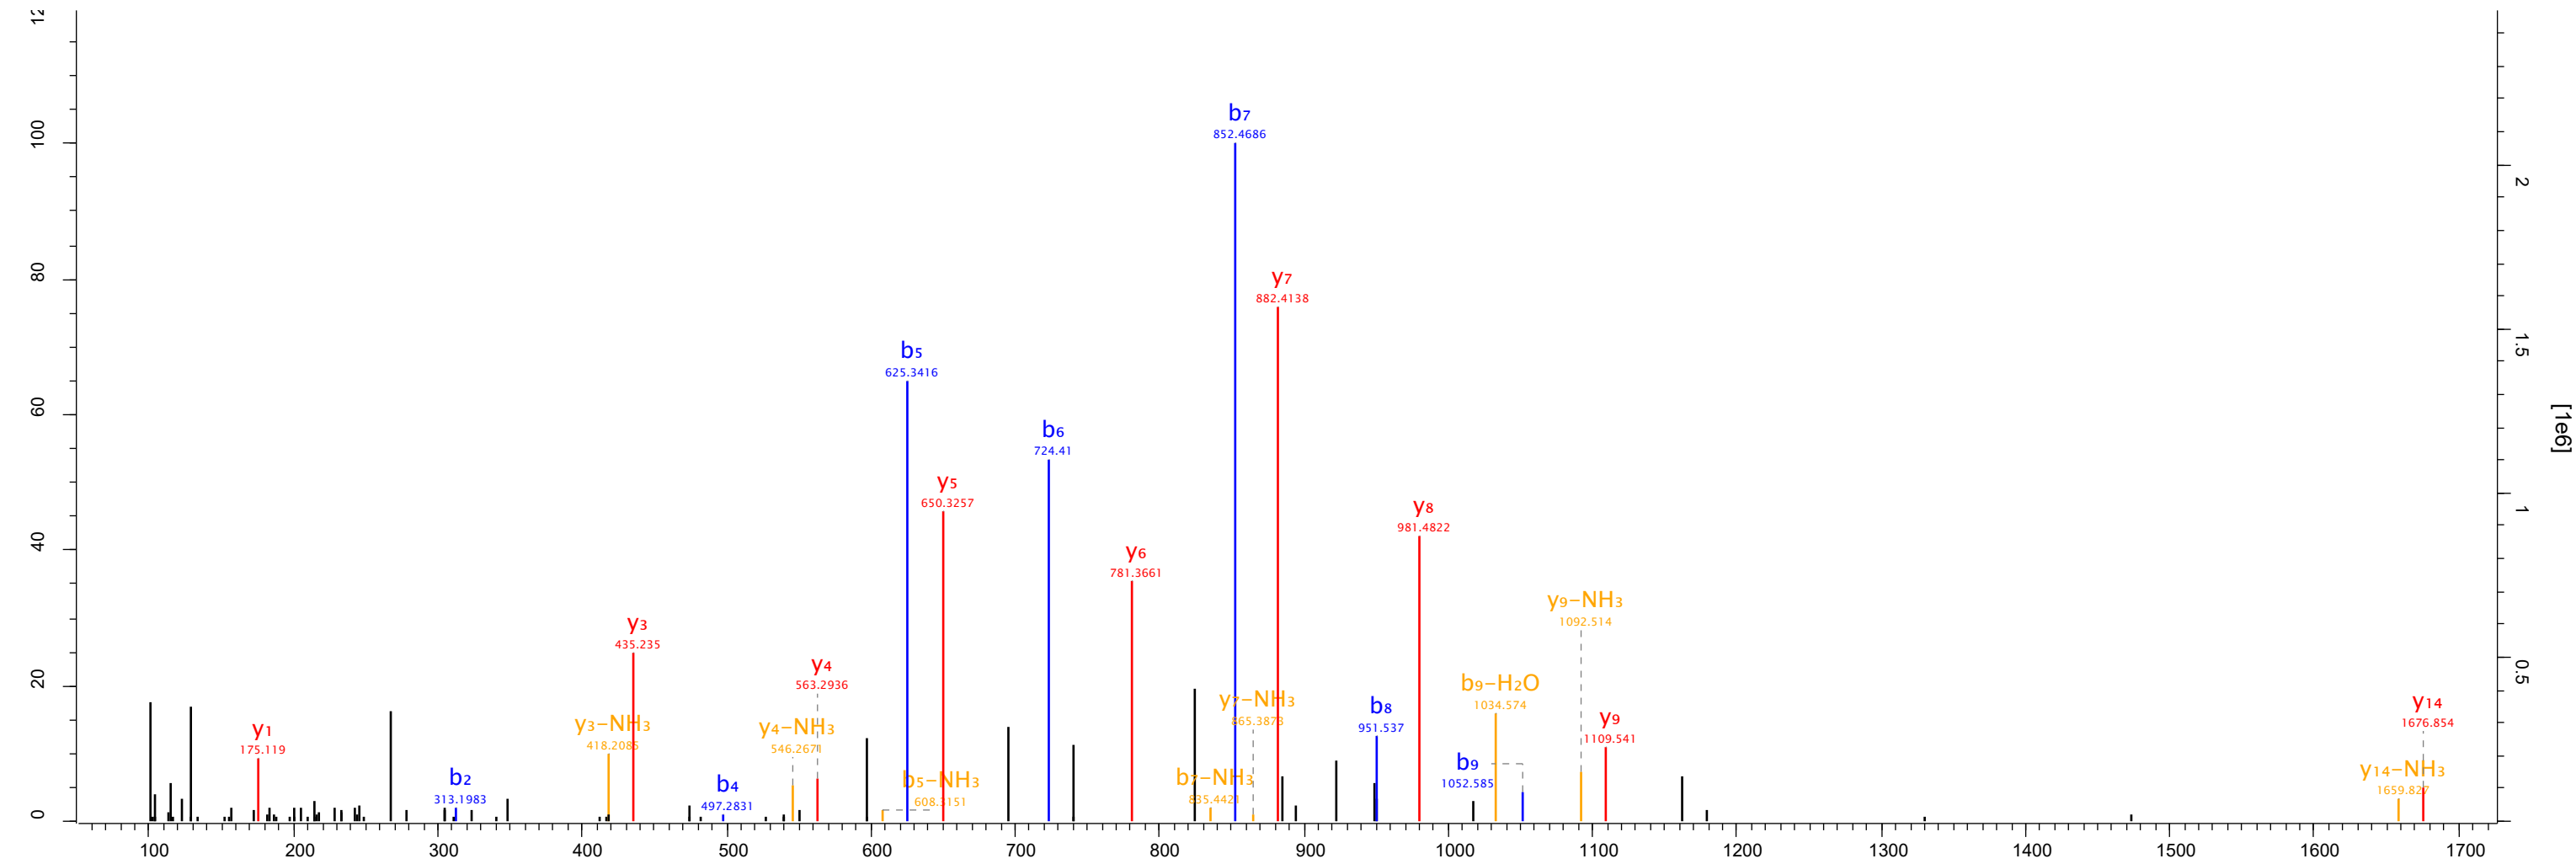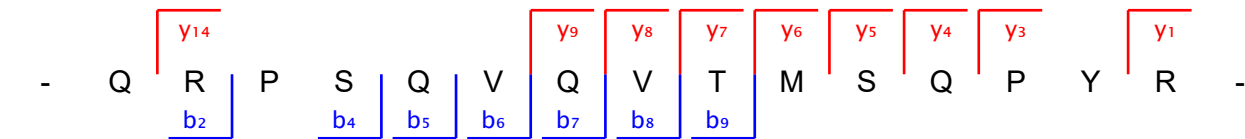

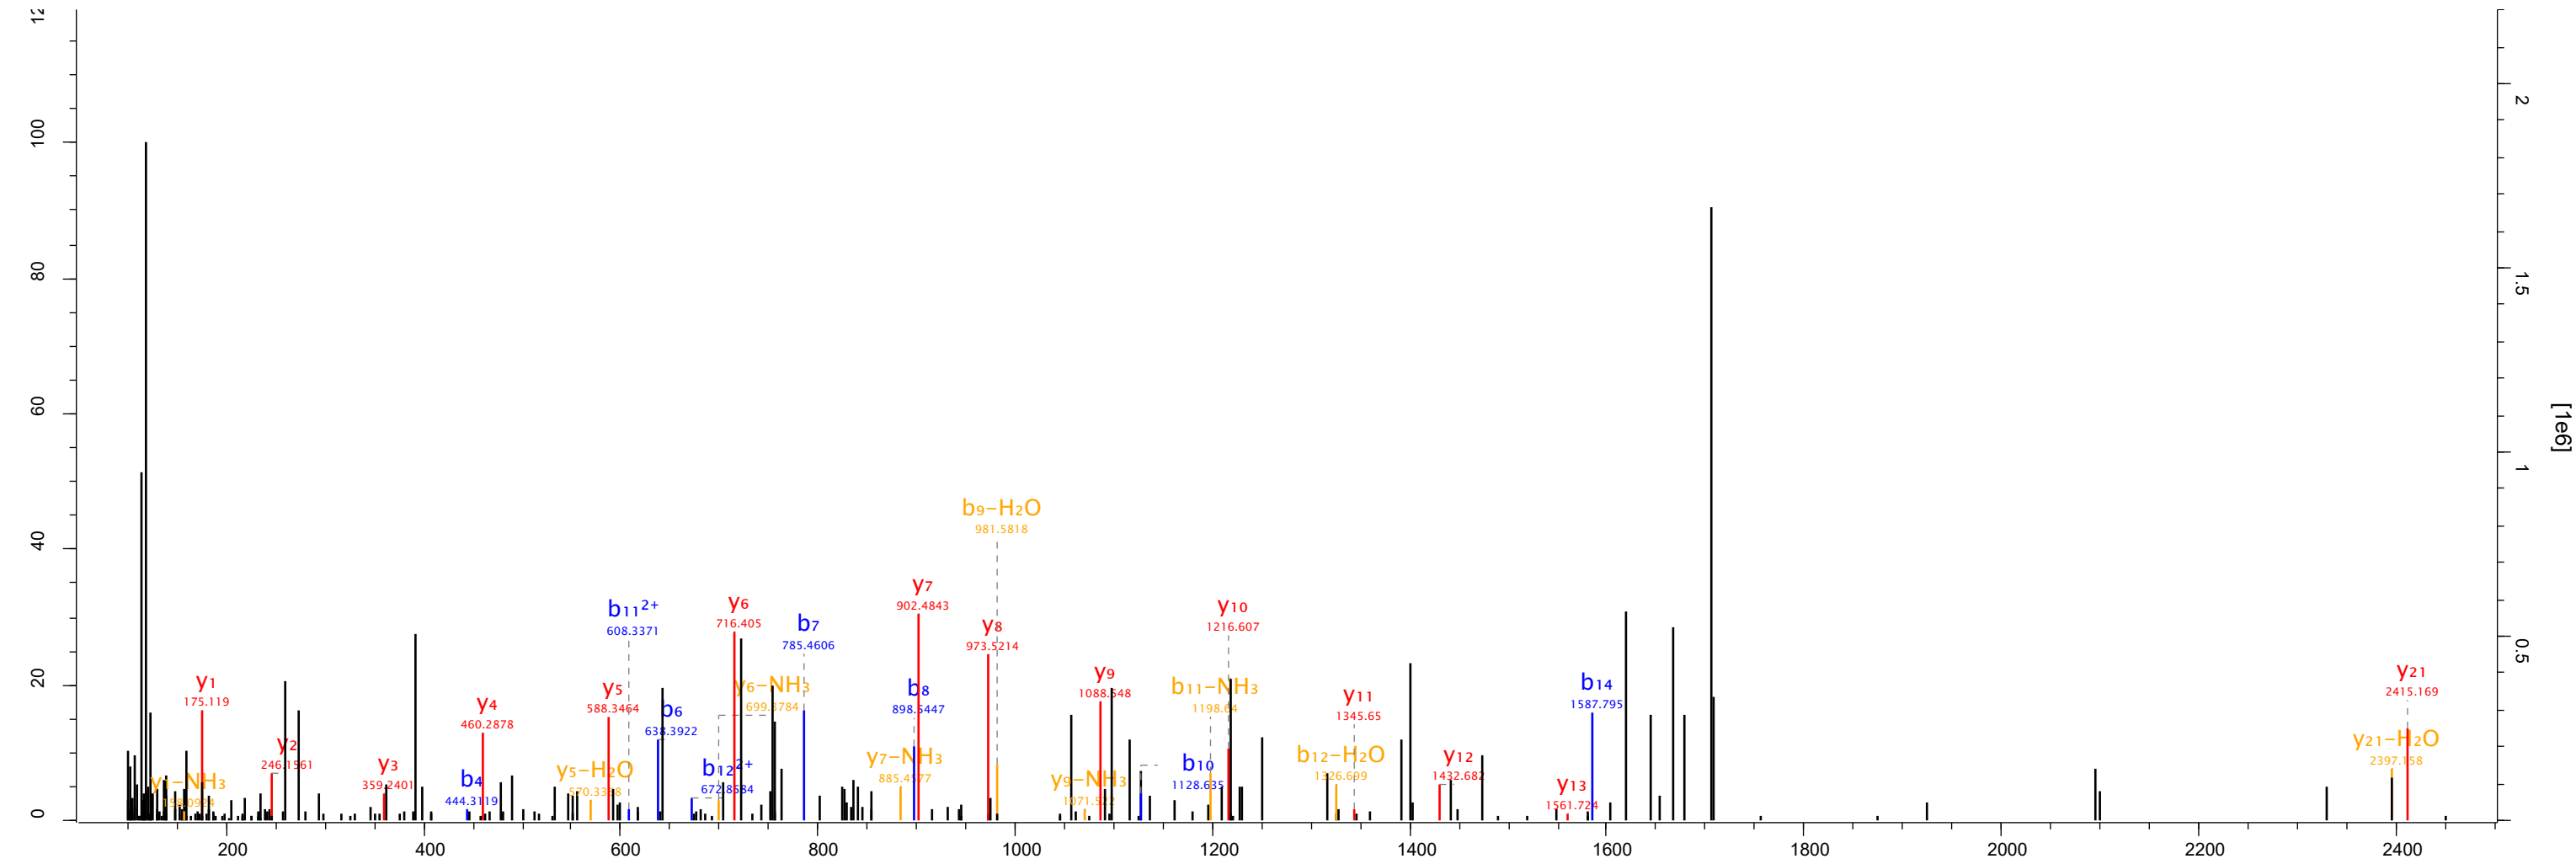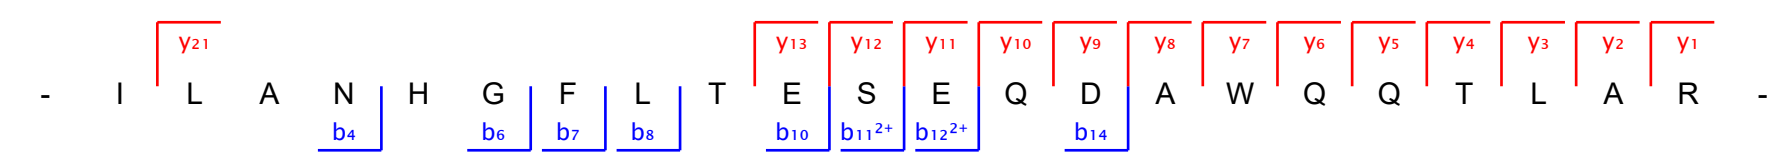

Raw file

Scan 40051 Method FTMS; HCD Score 197.45 m/z 984.59

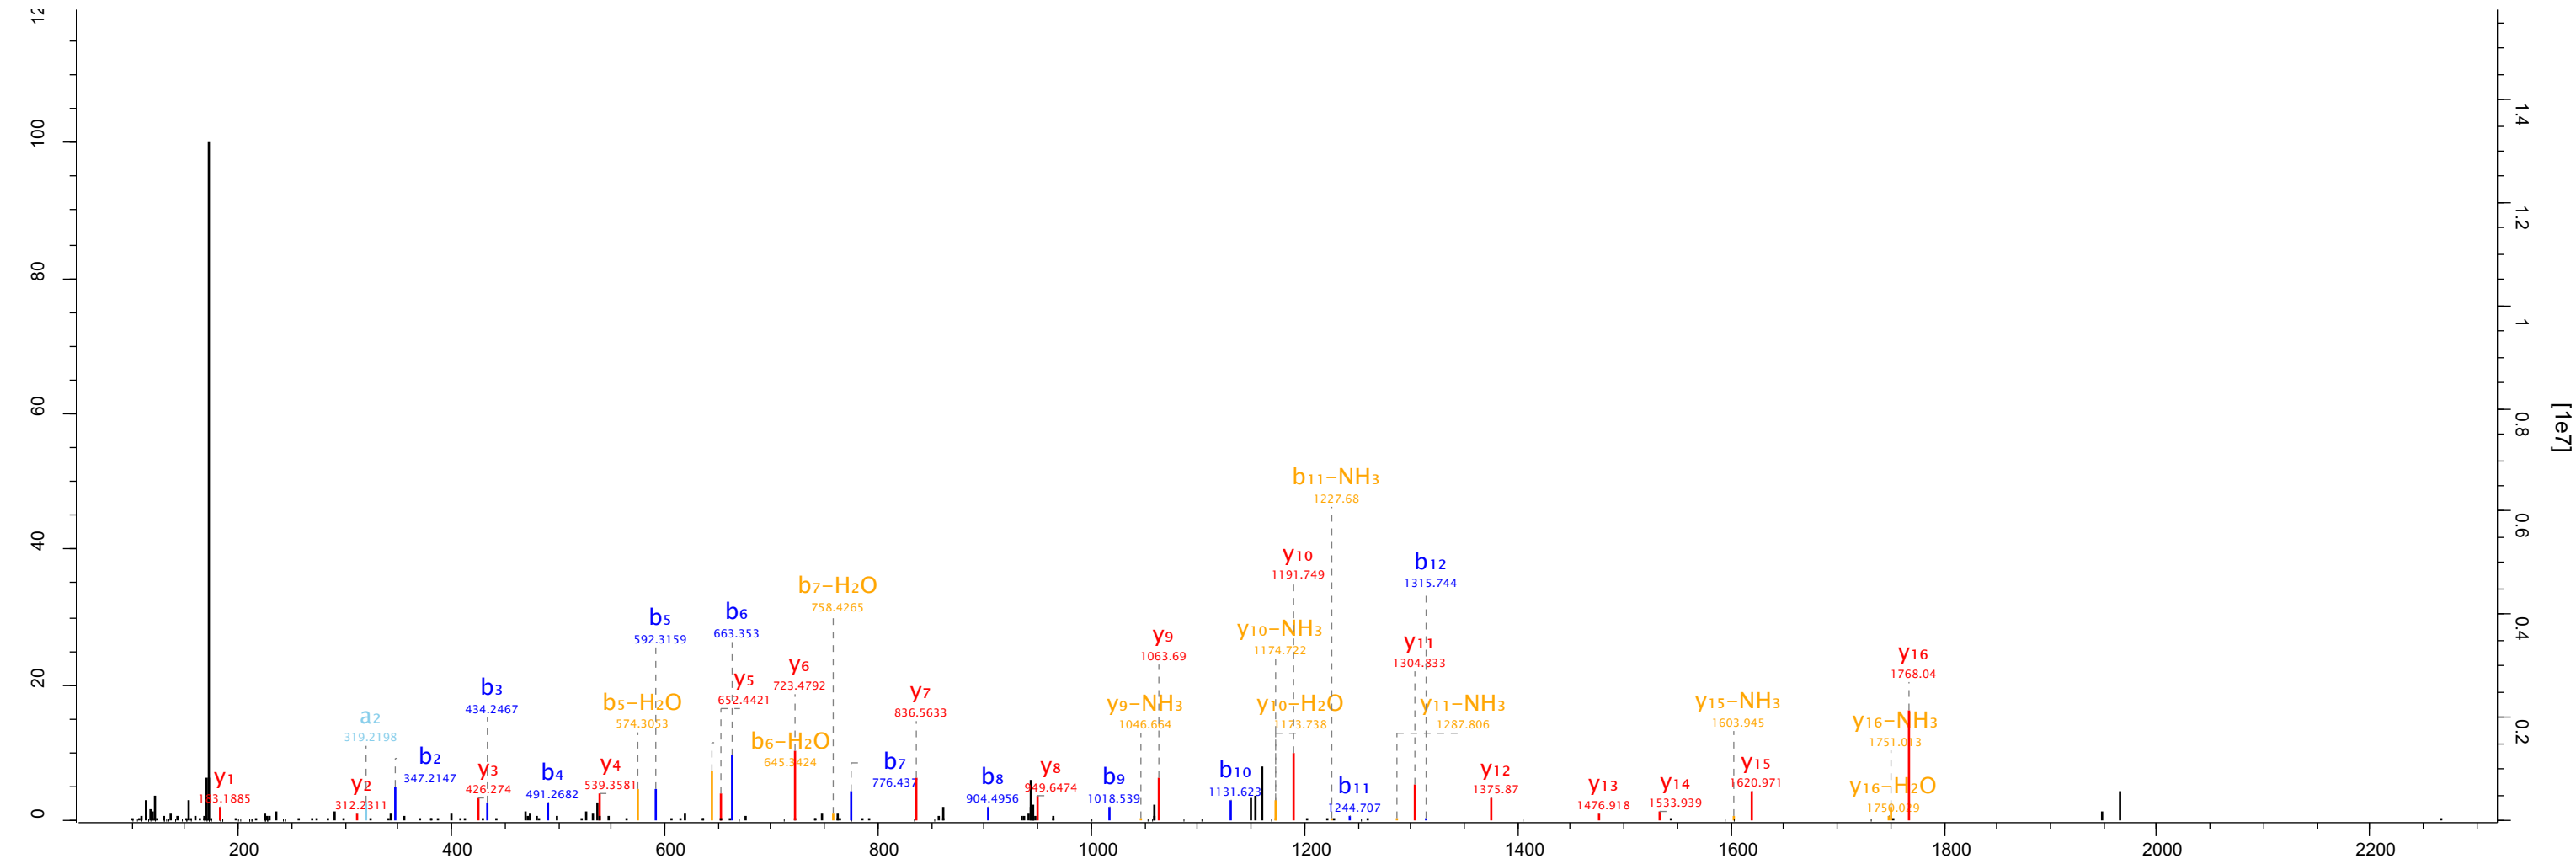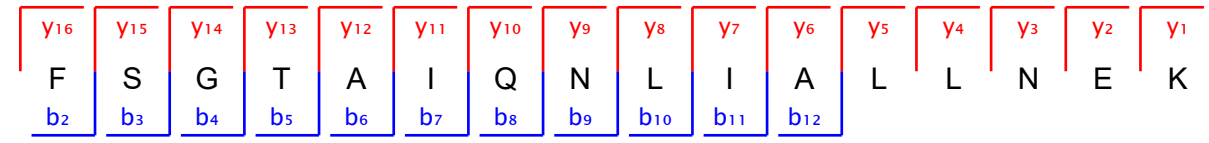

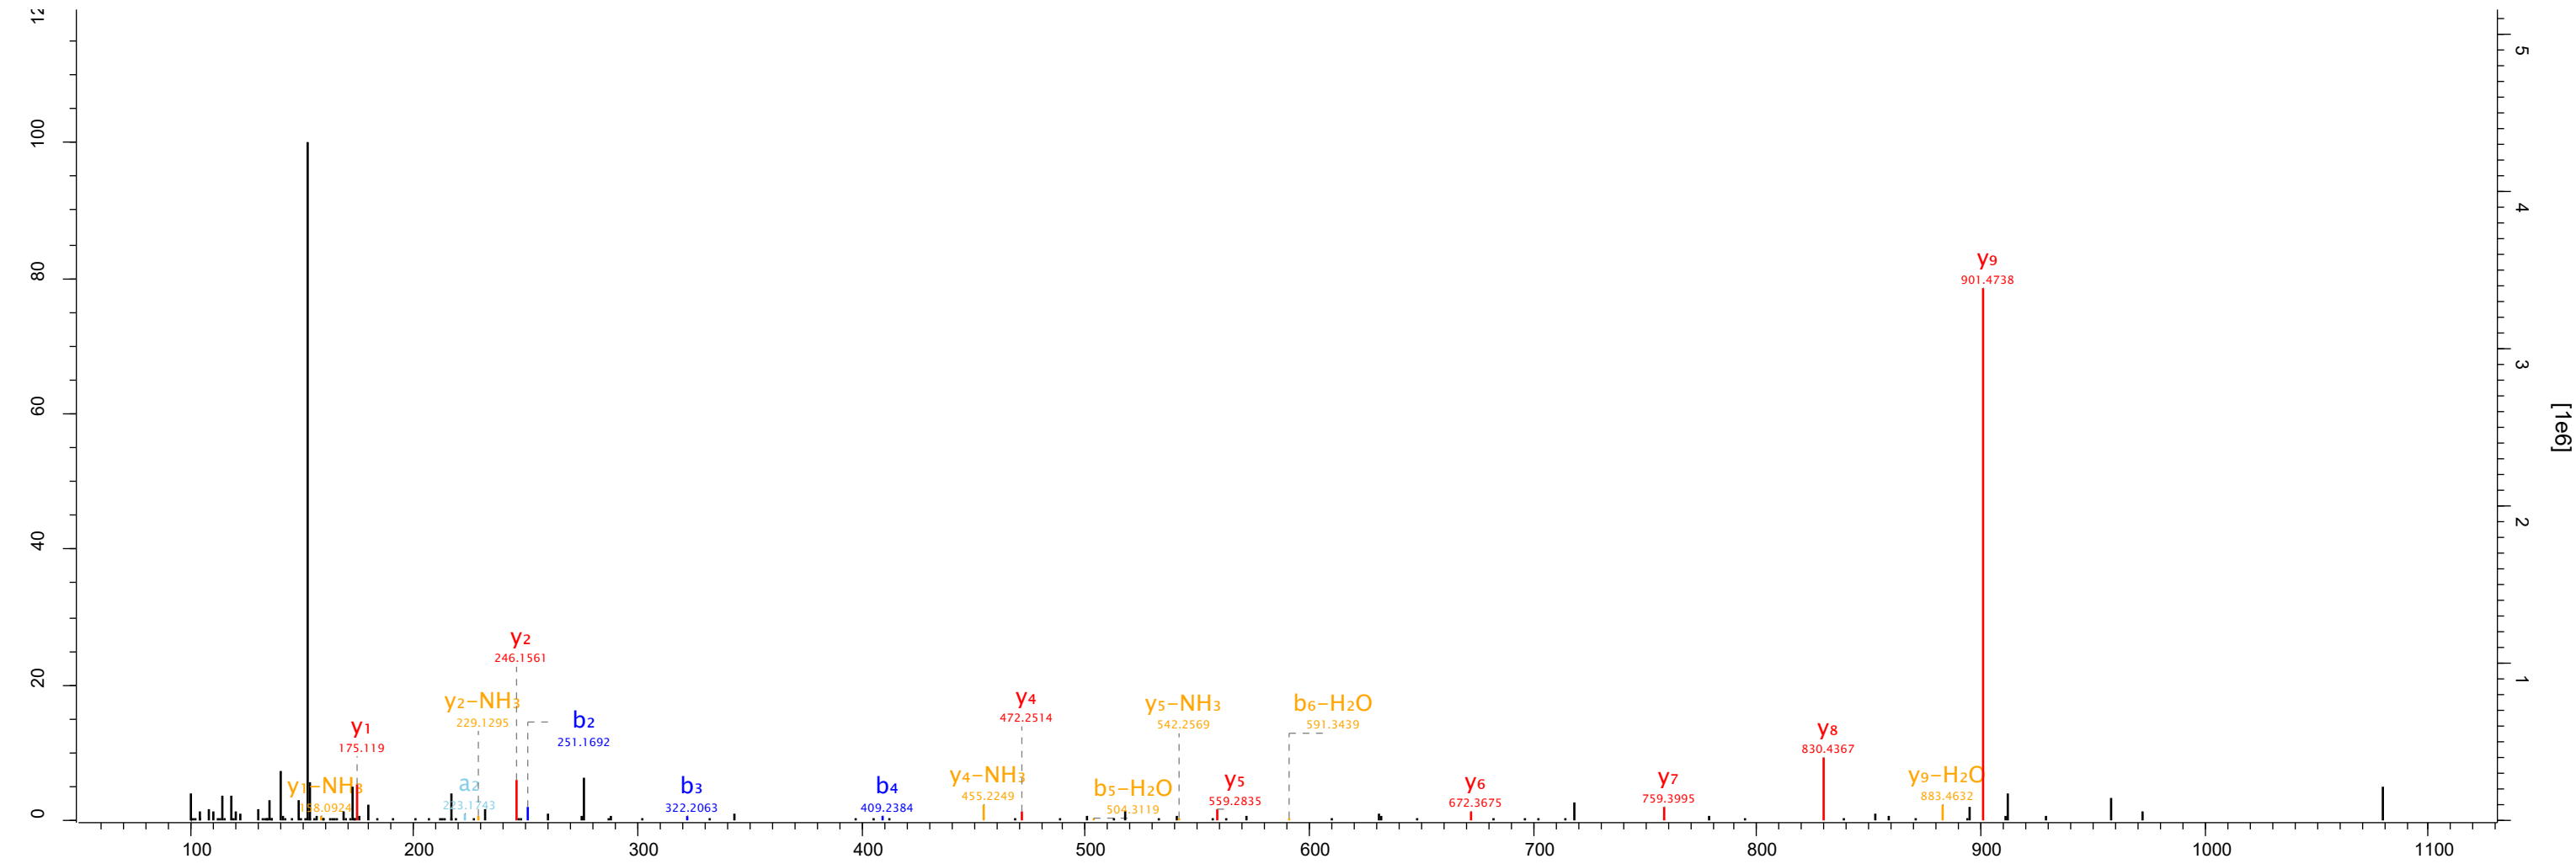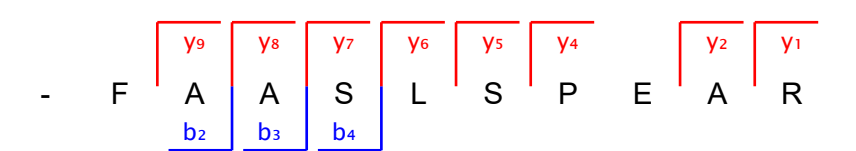

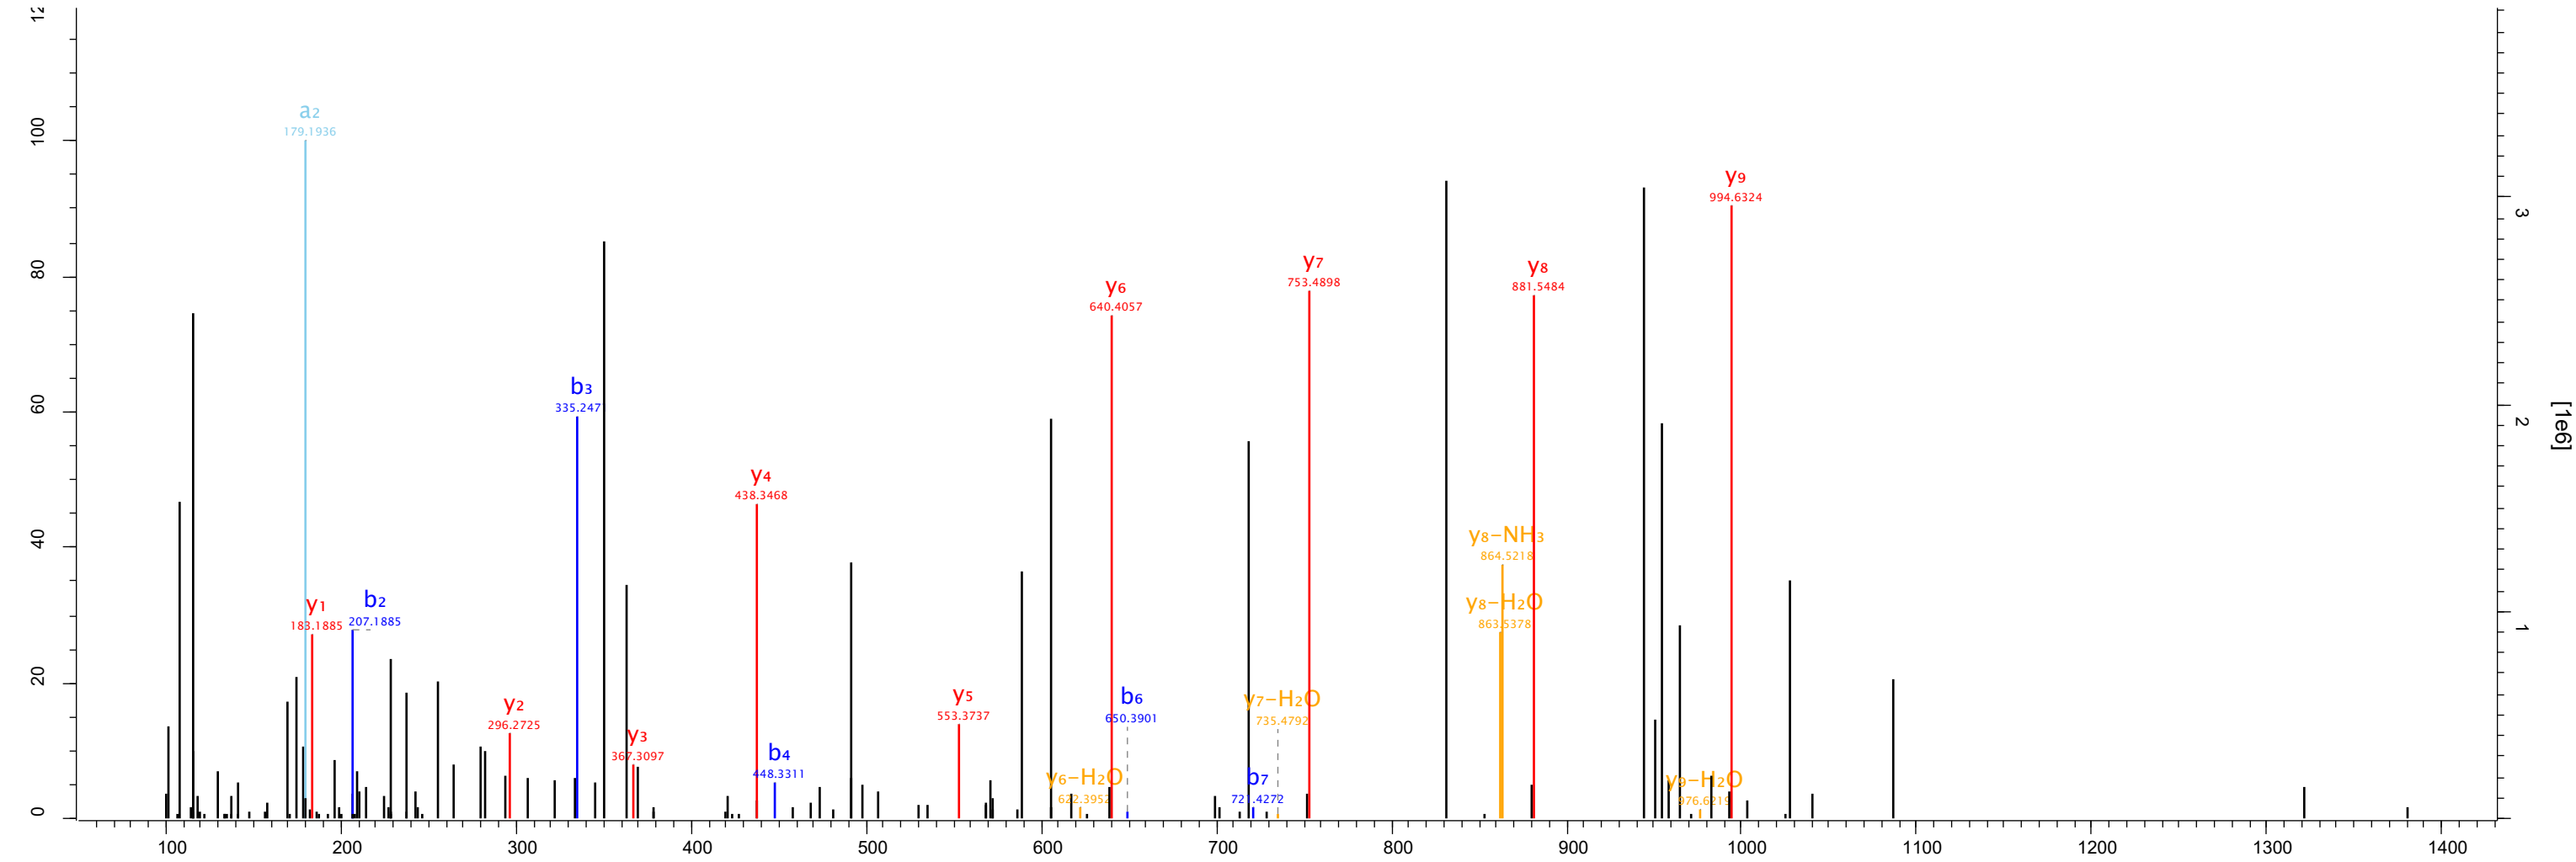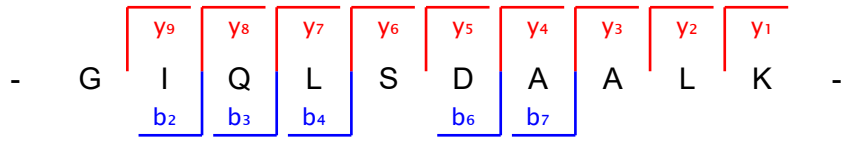

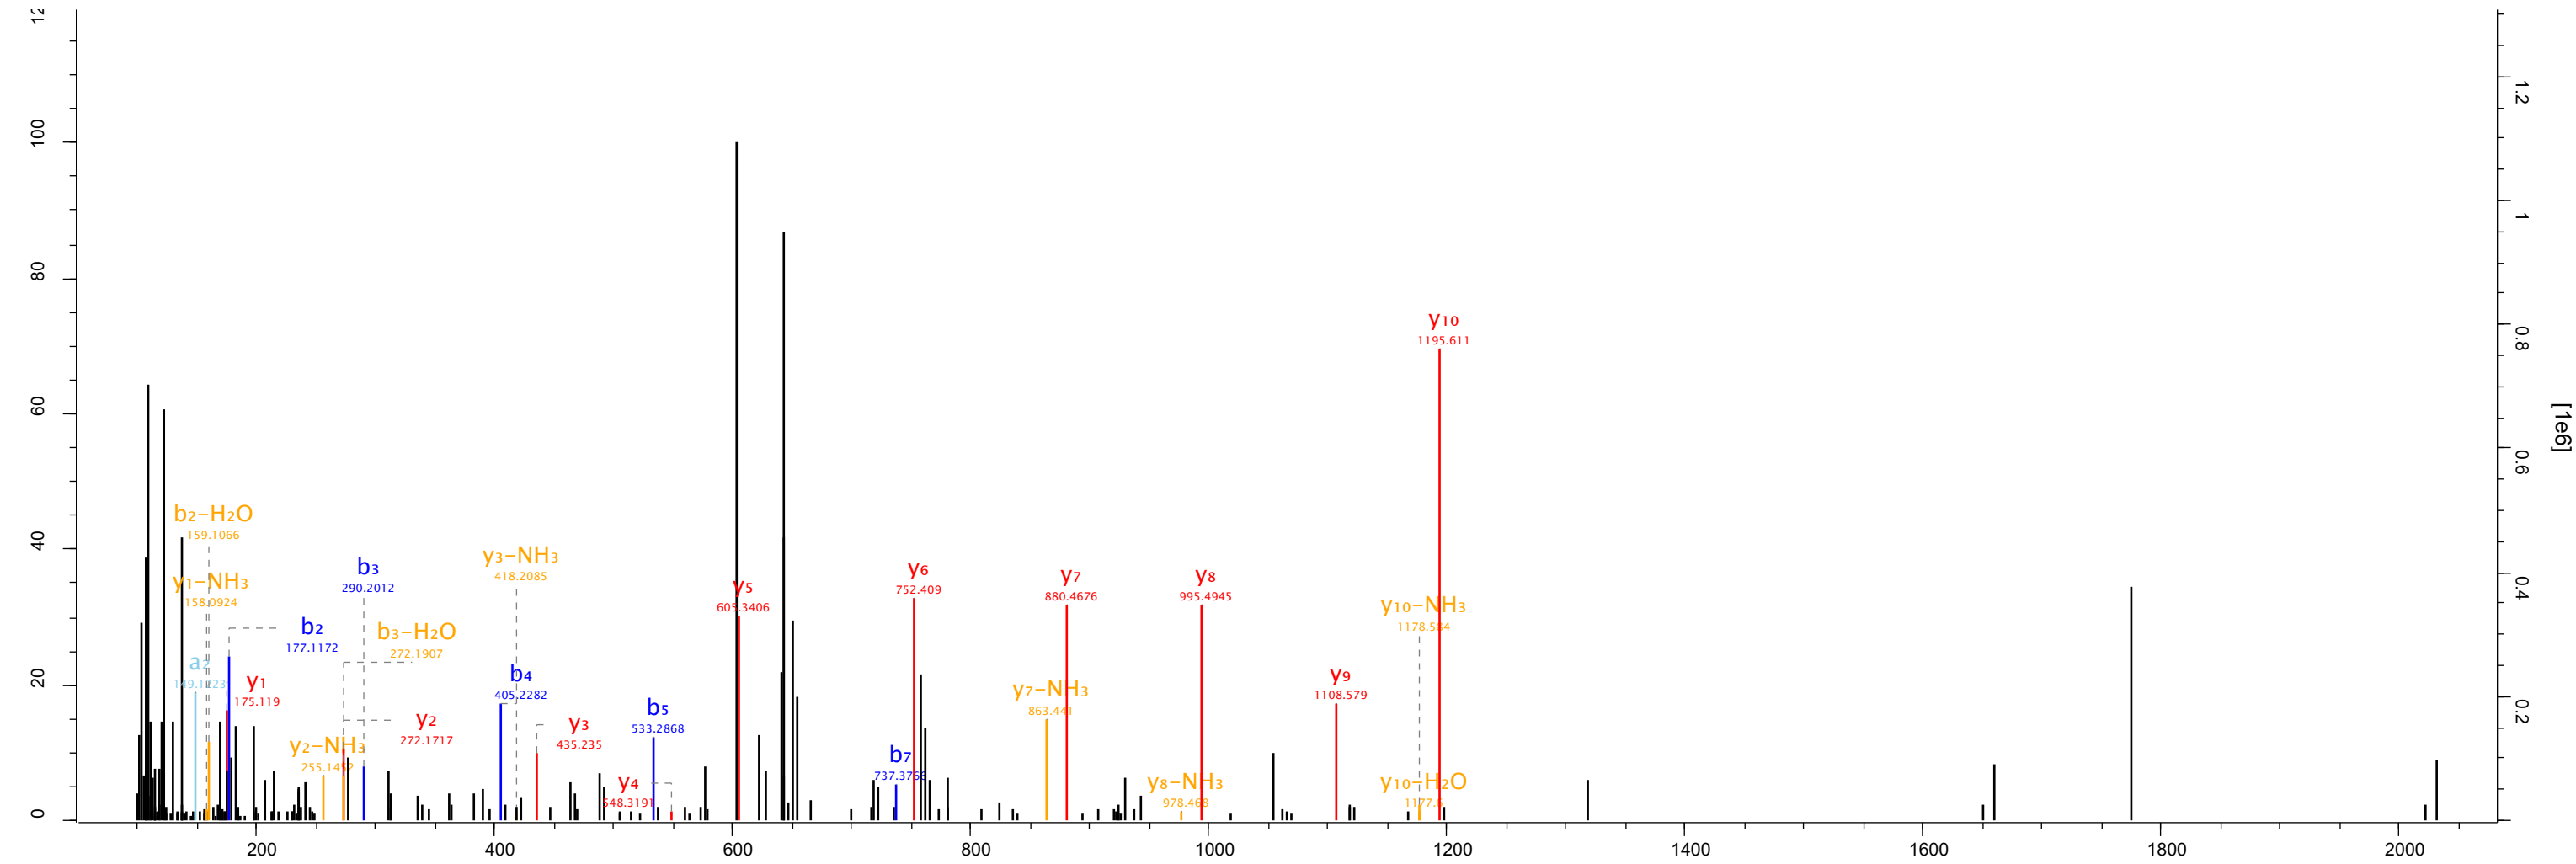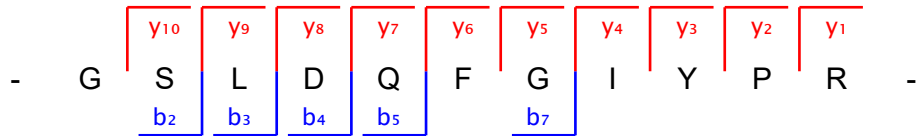

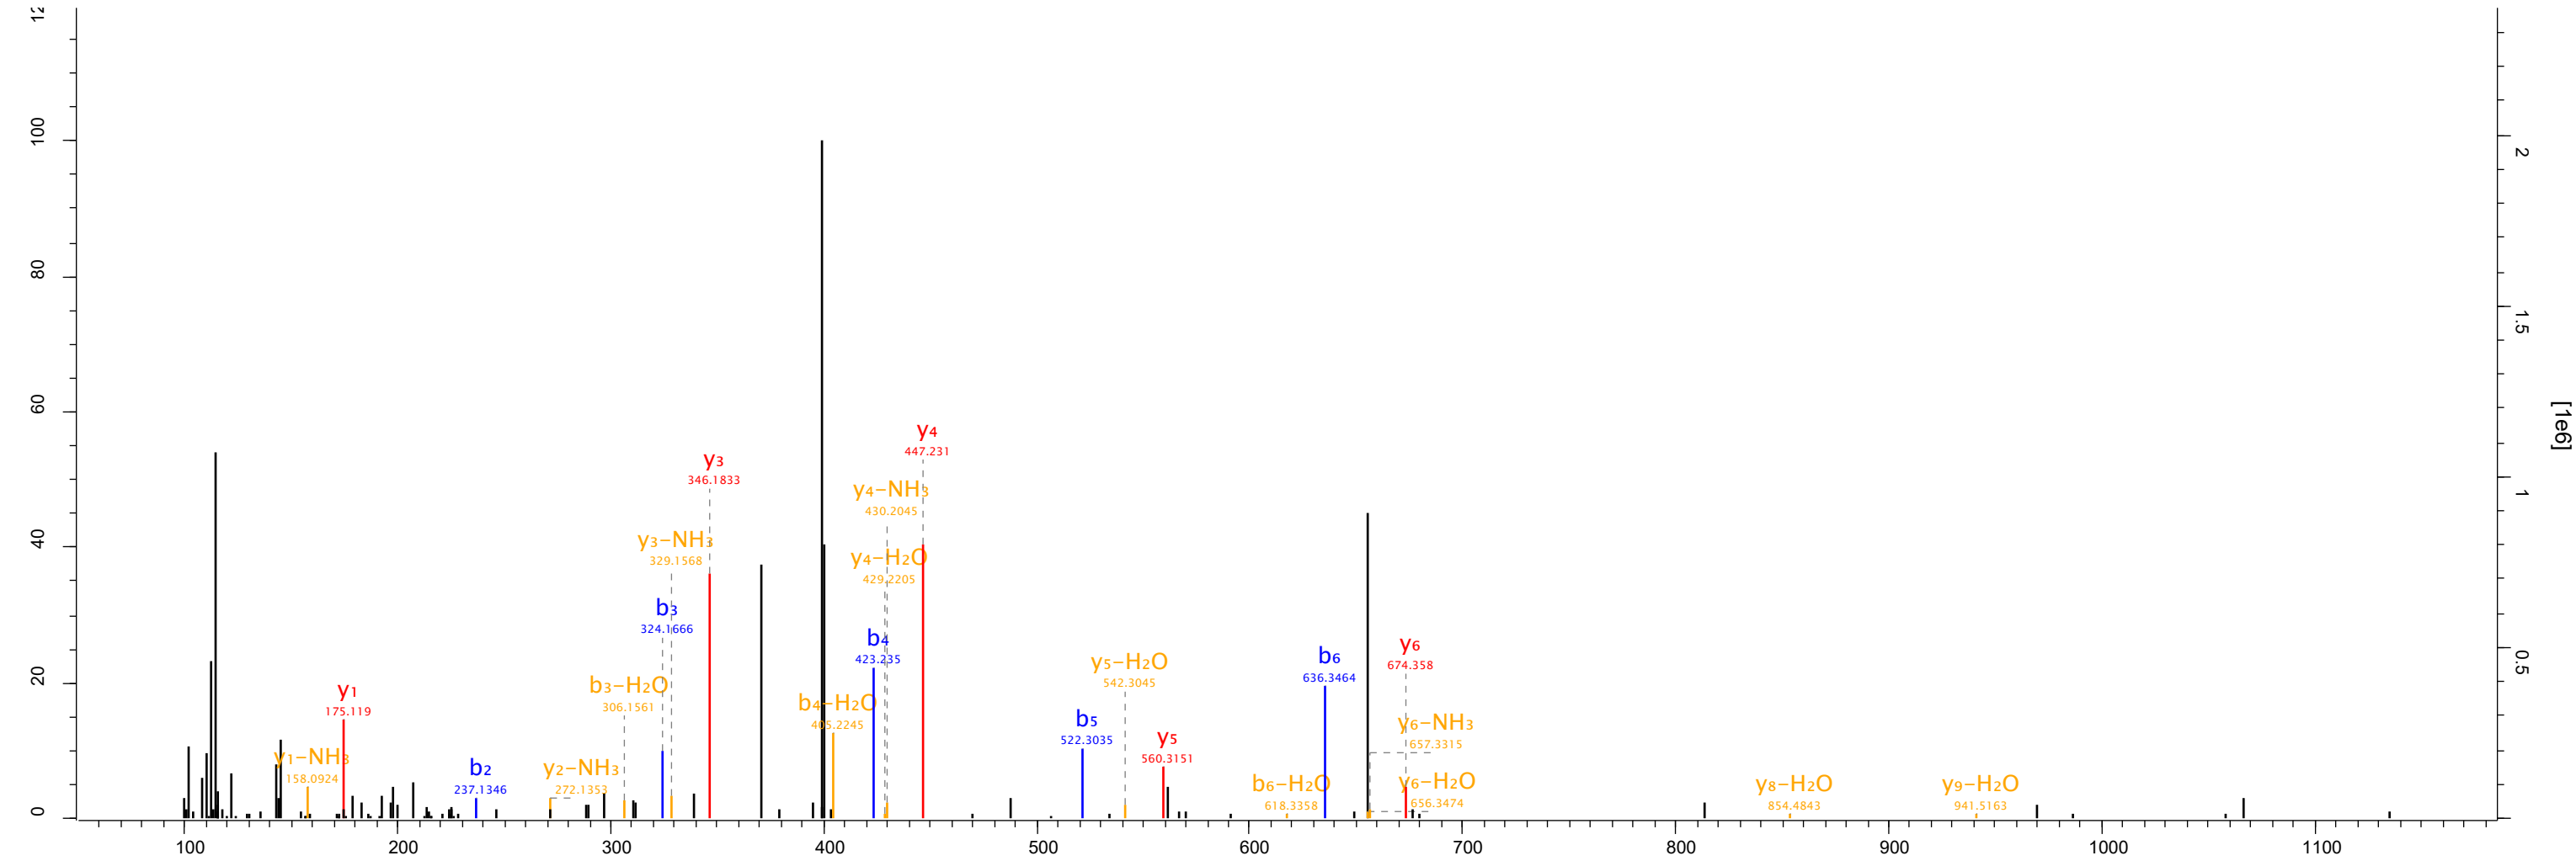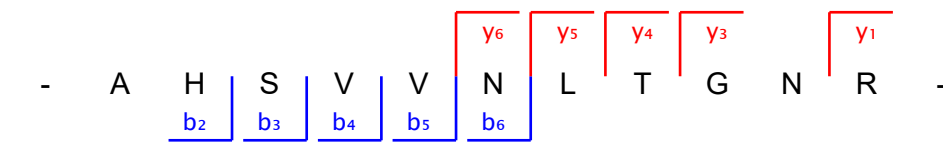



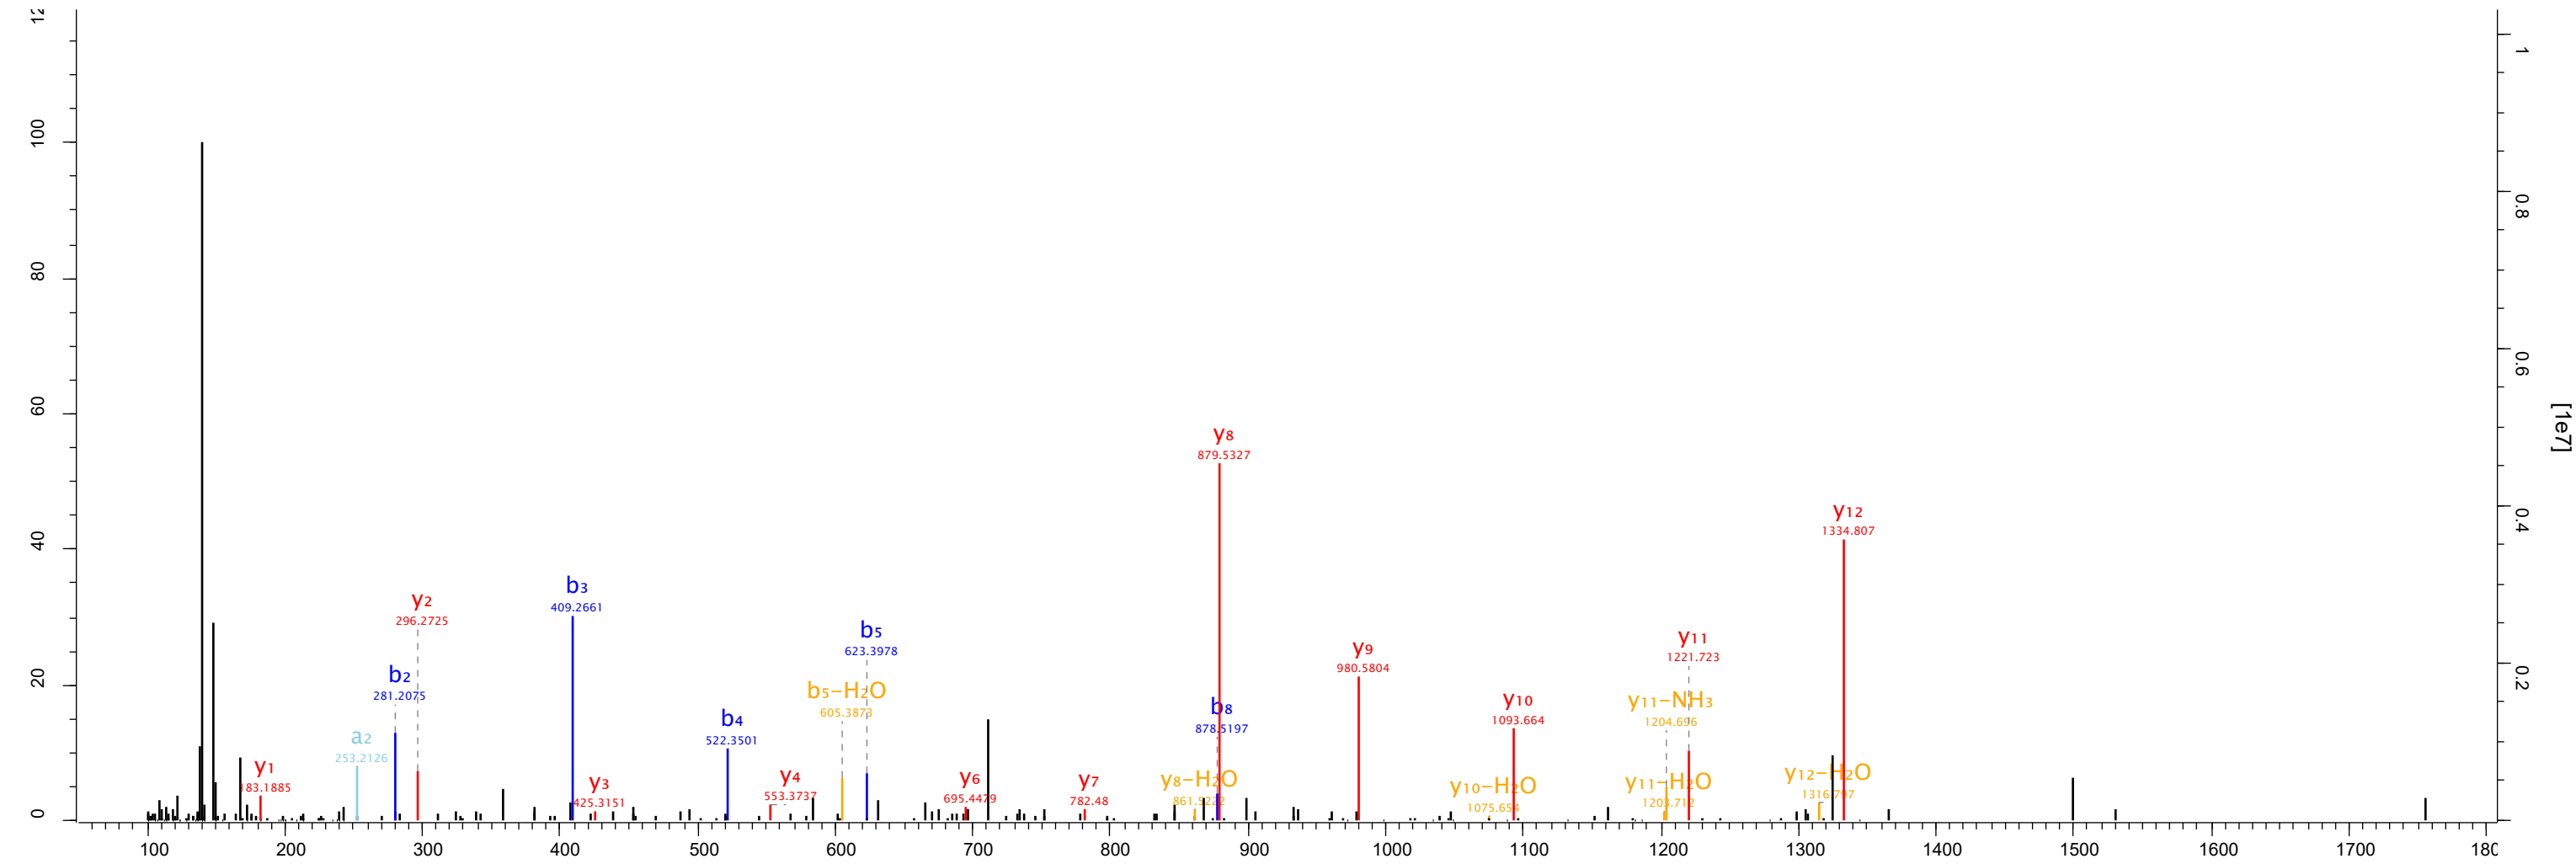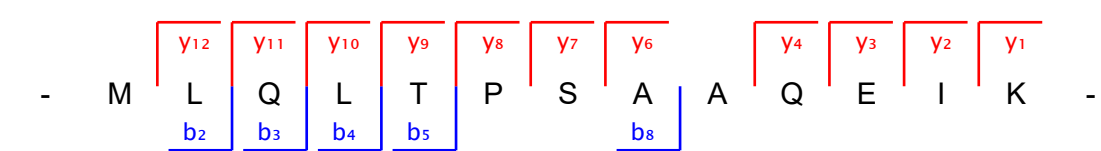

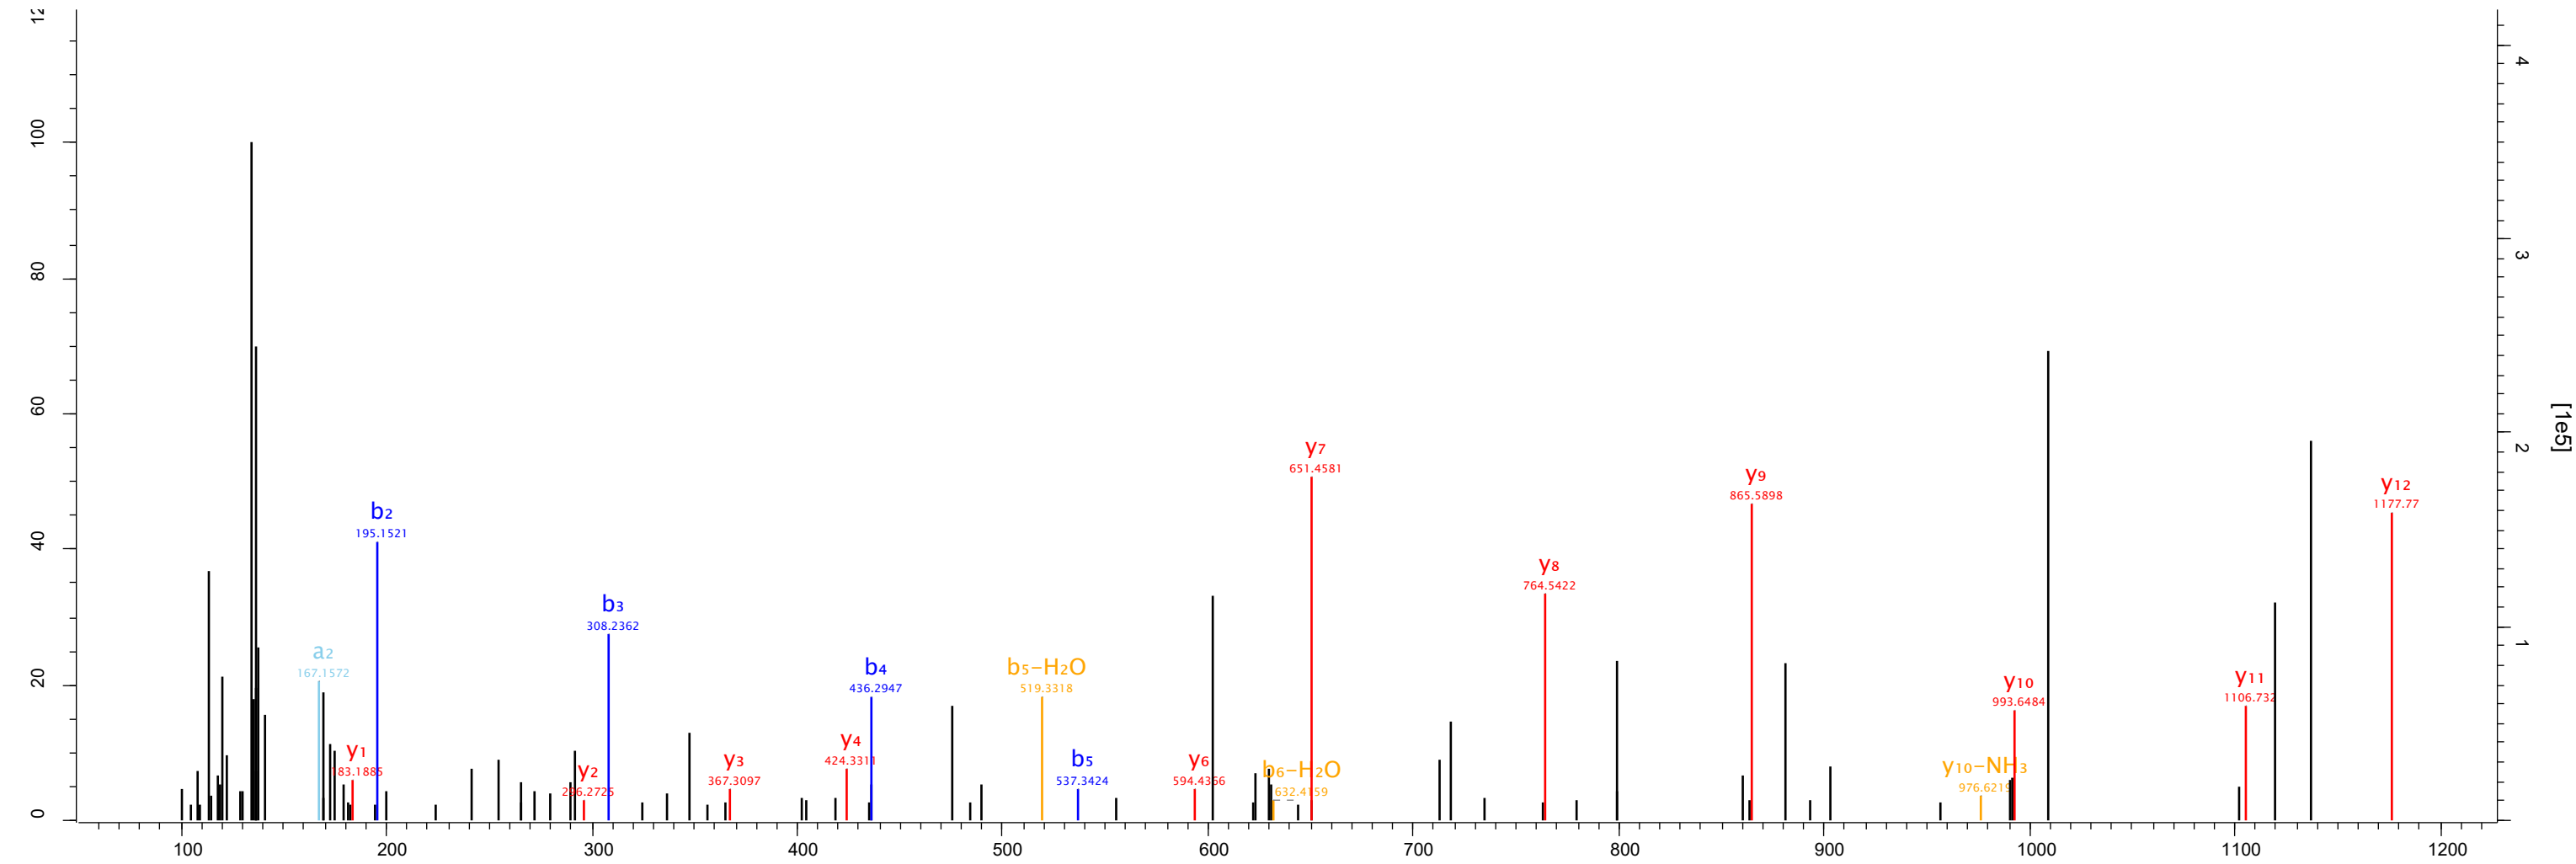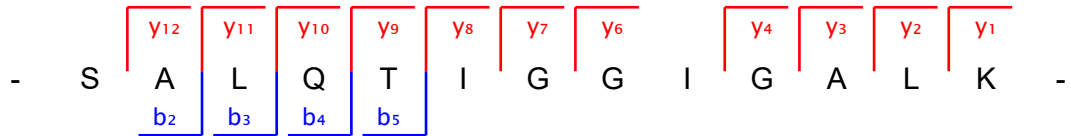

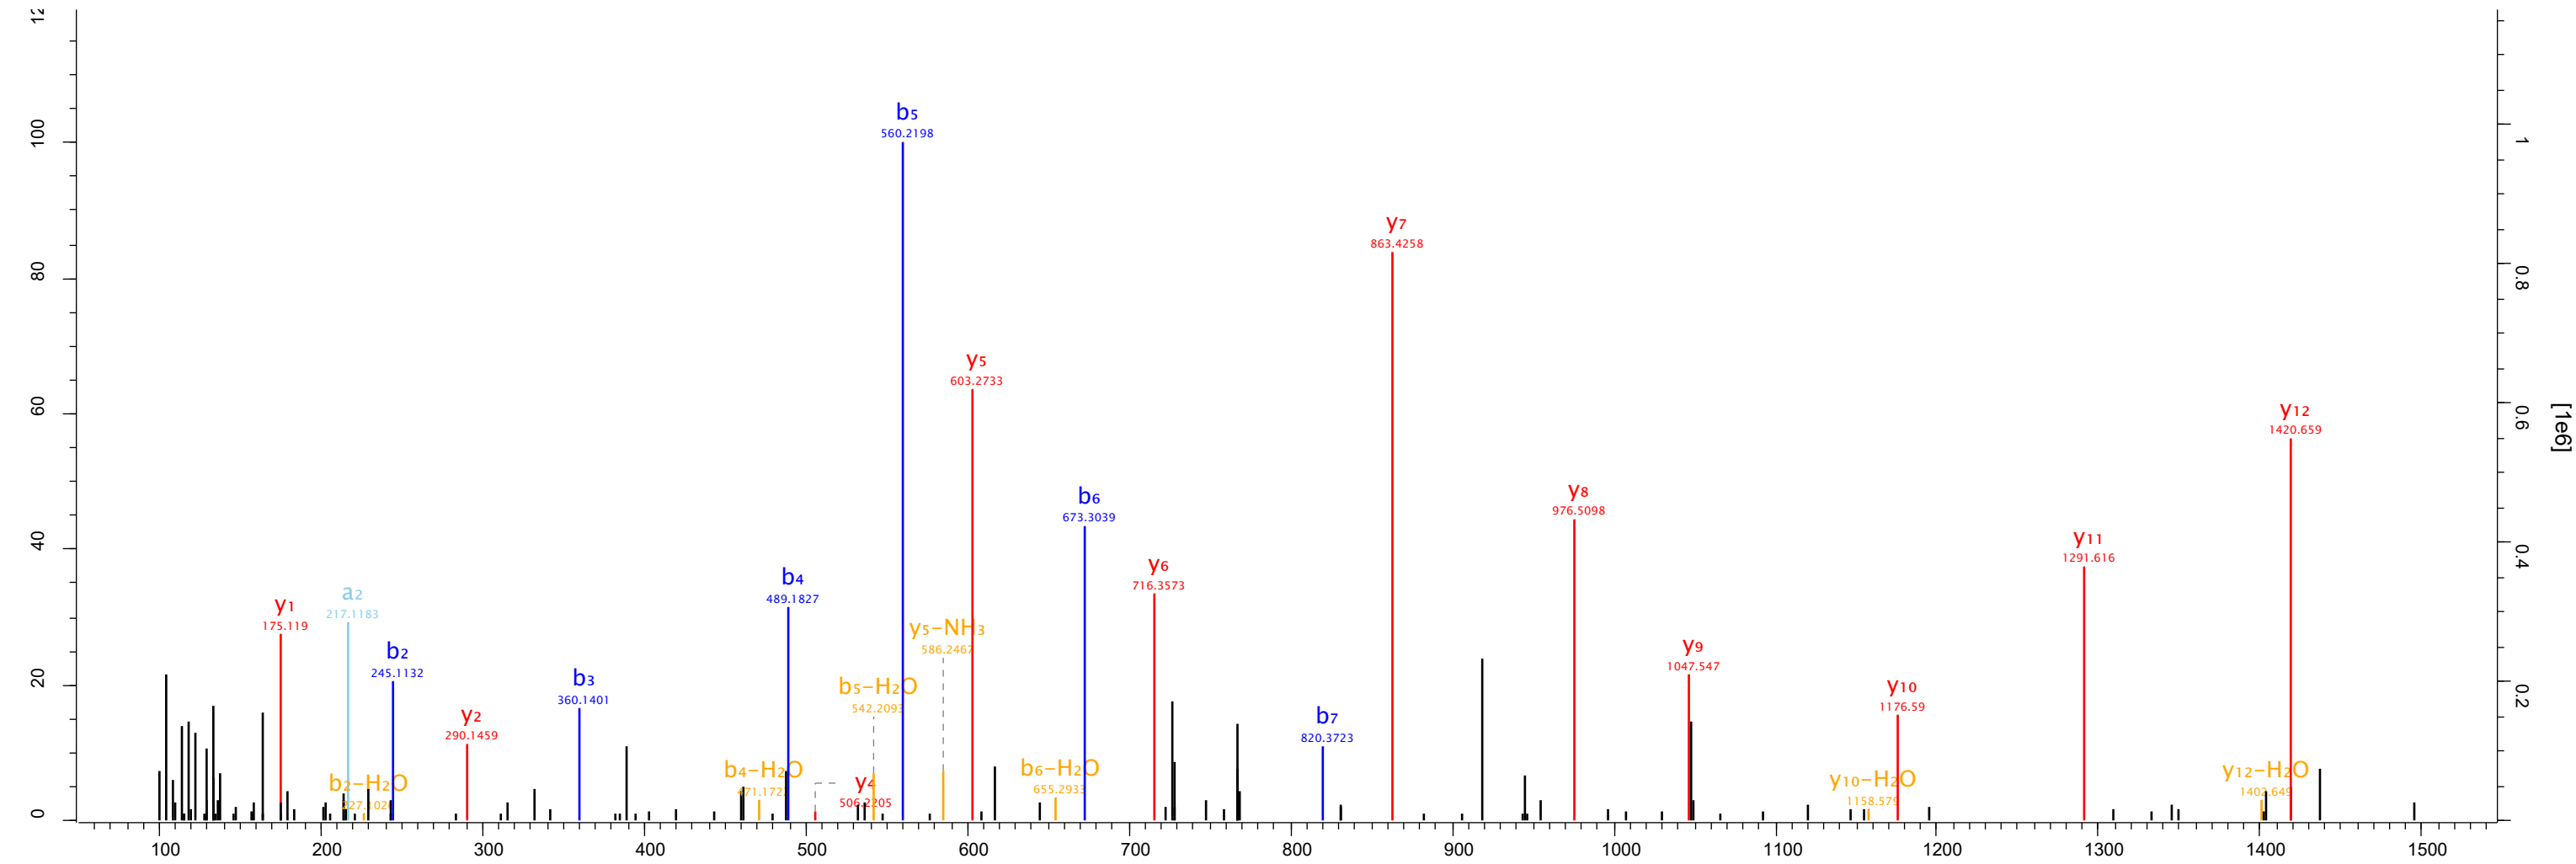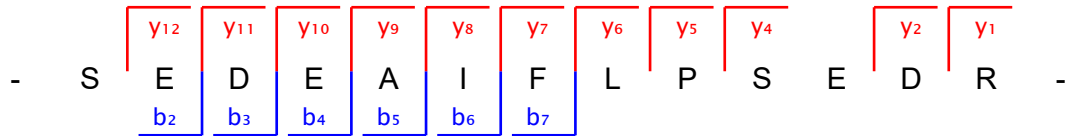

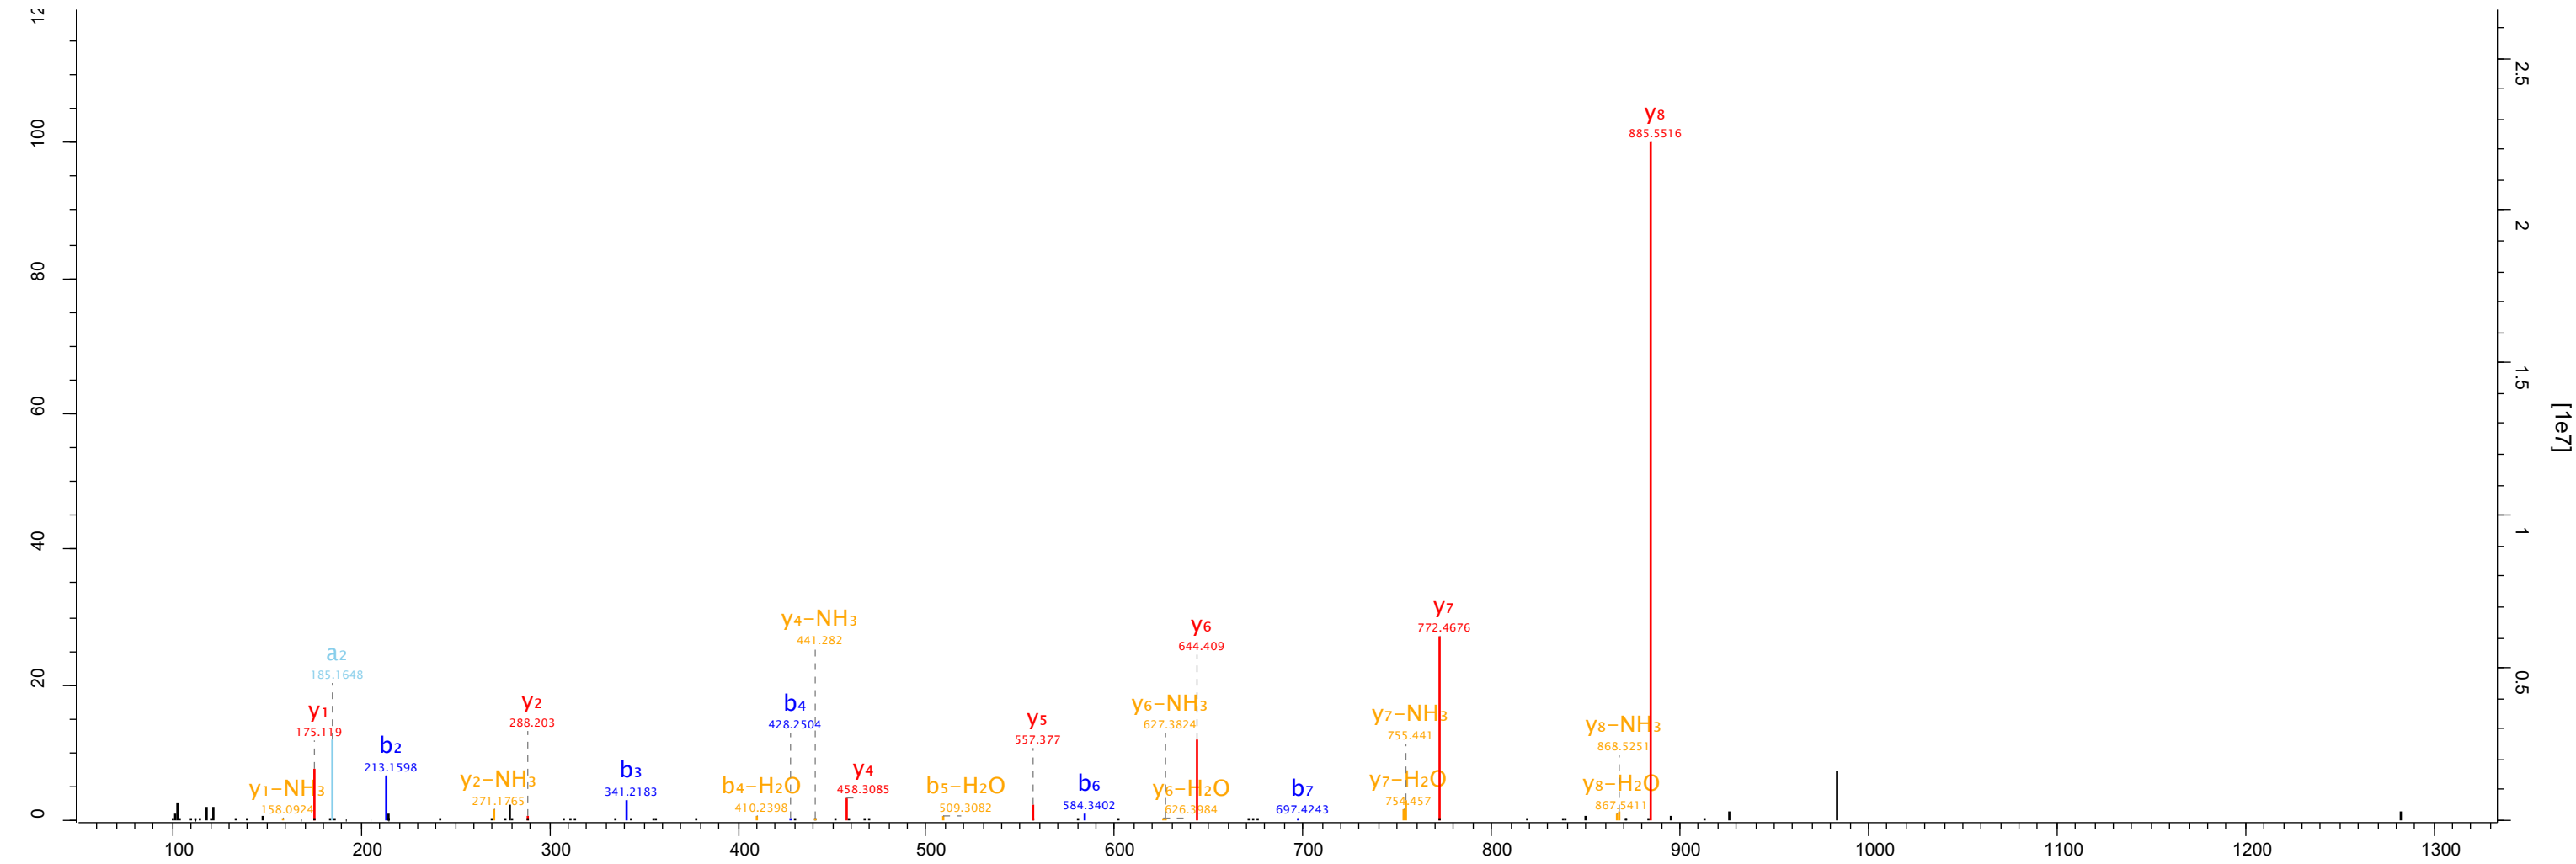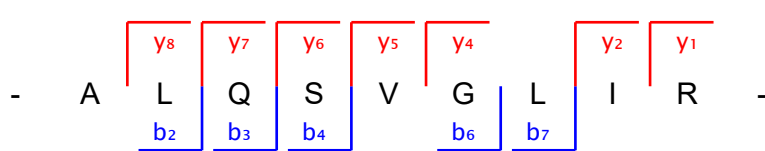

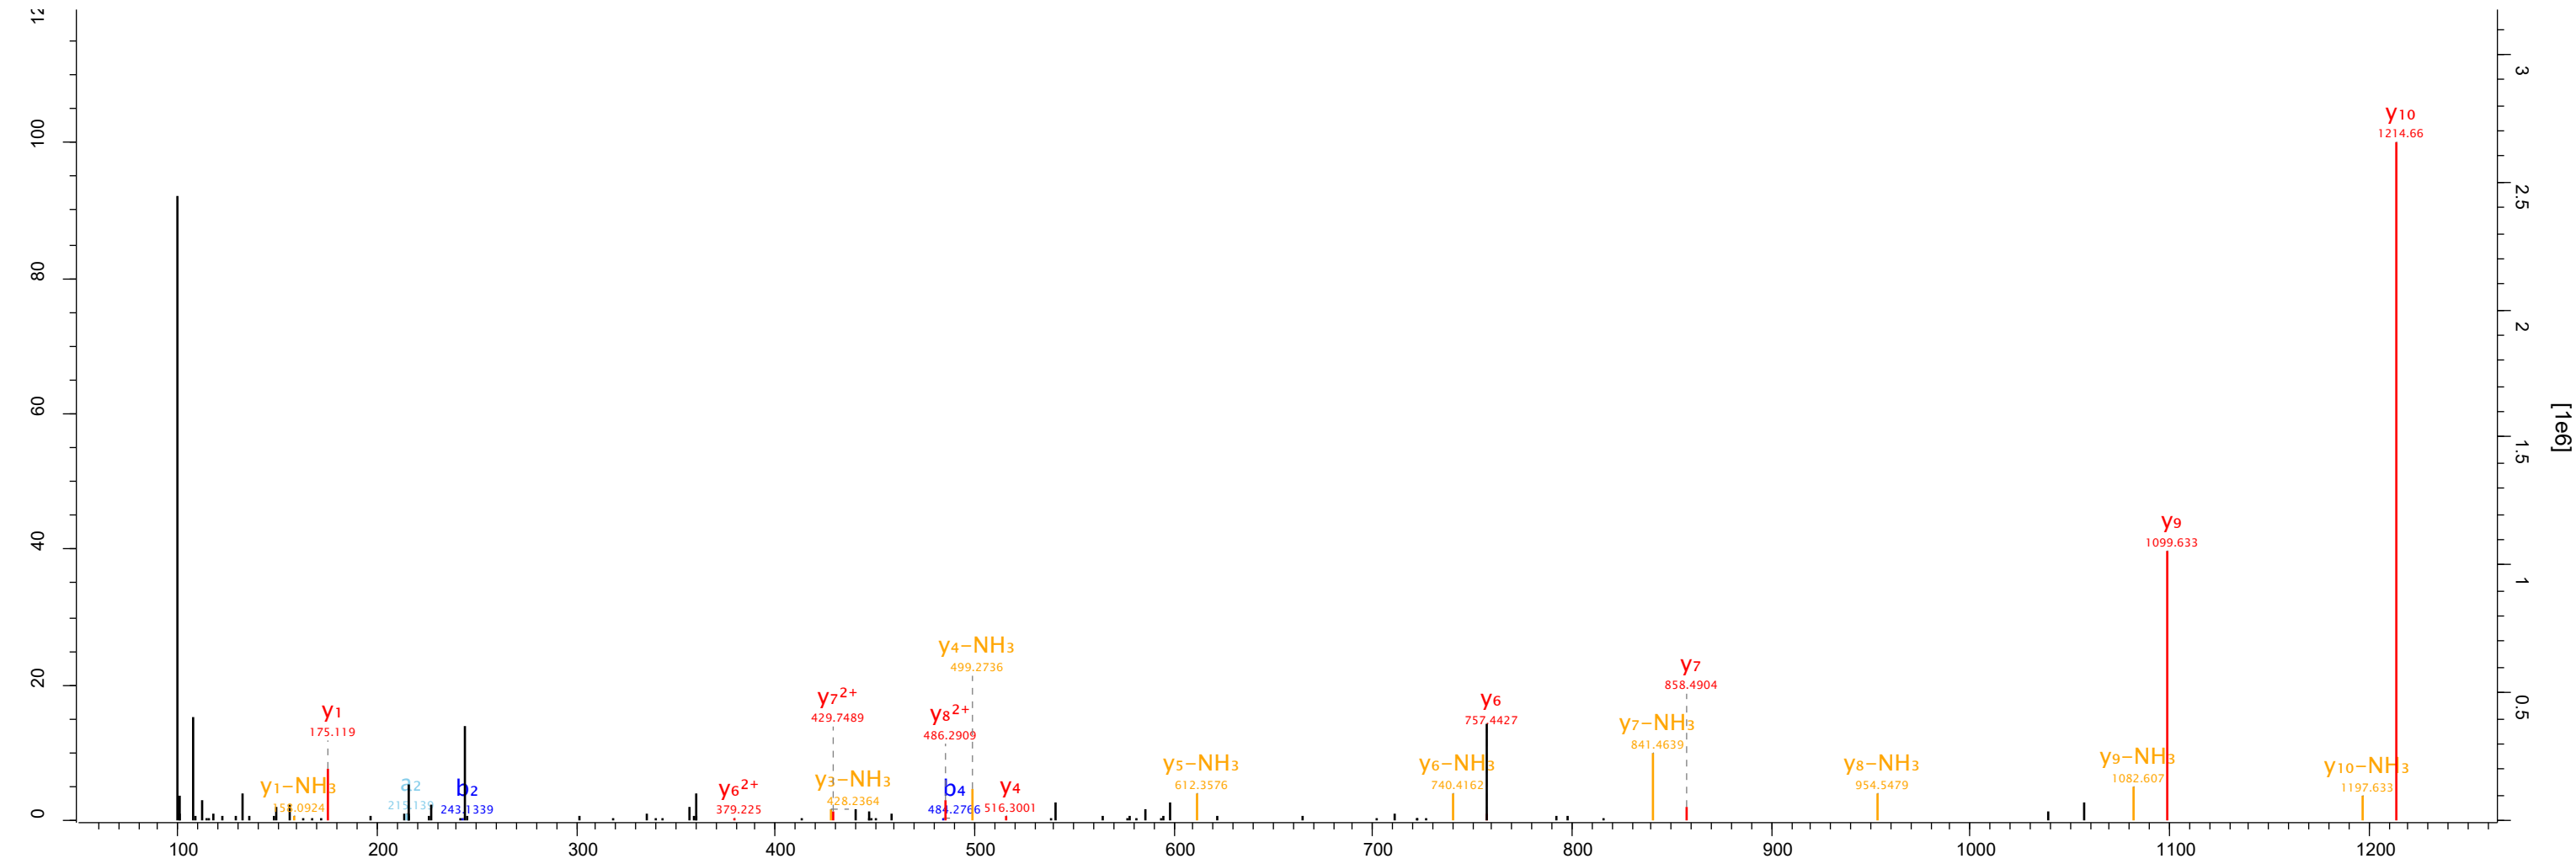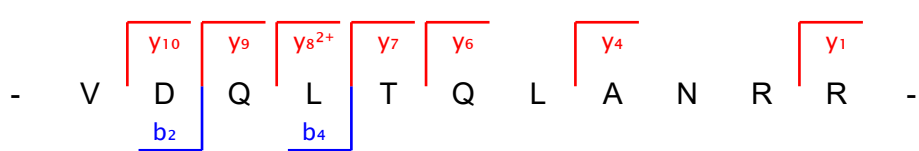

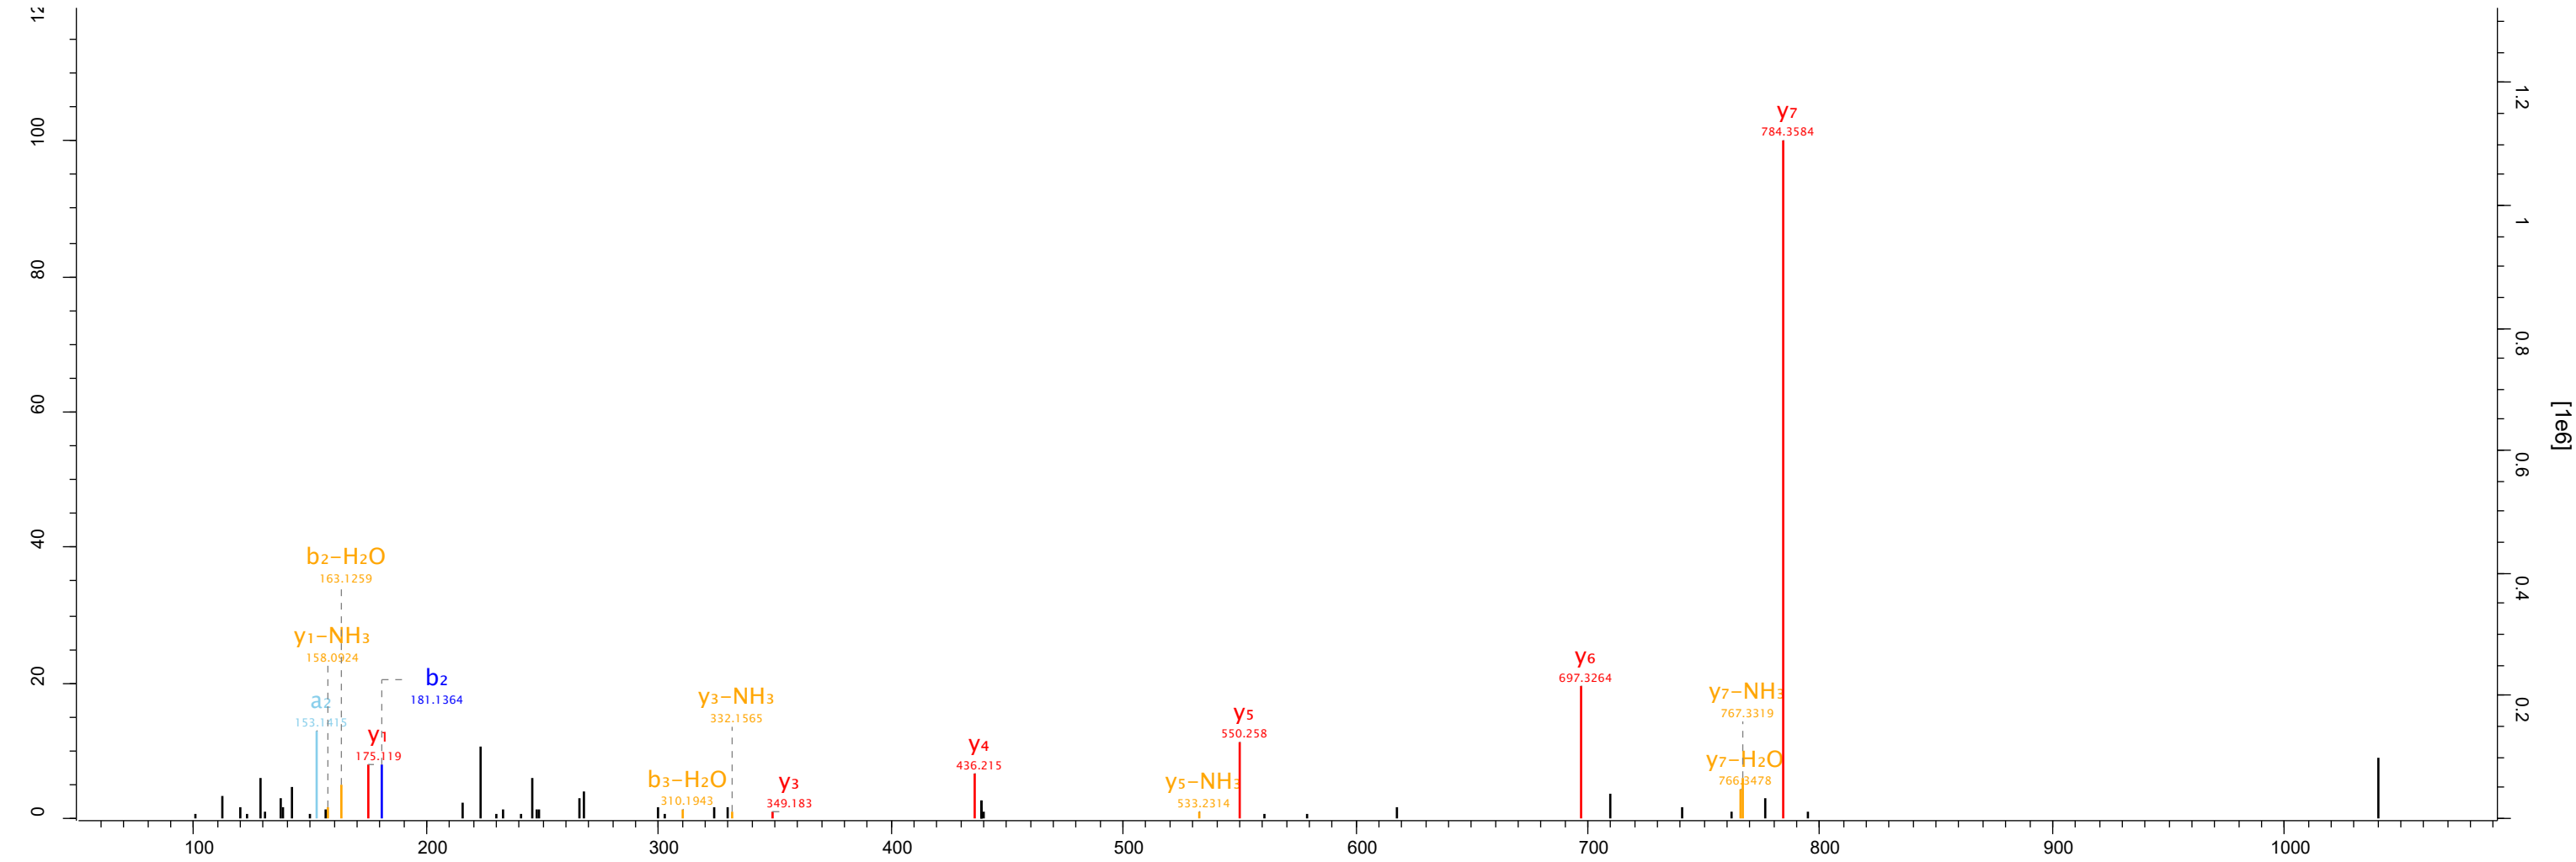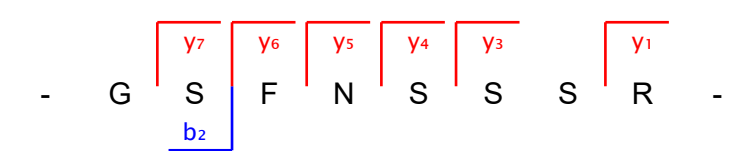

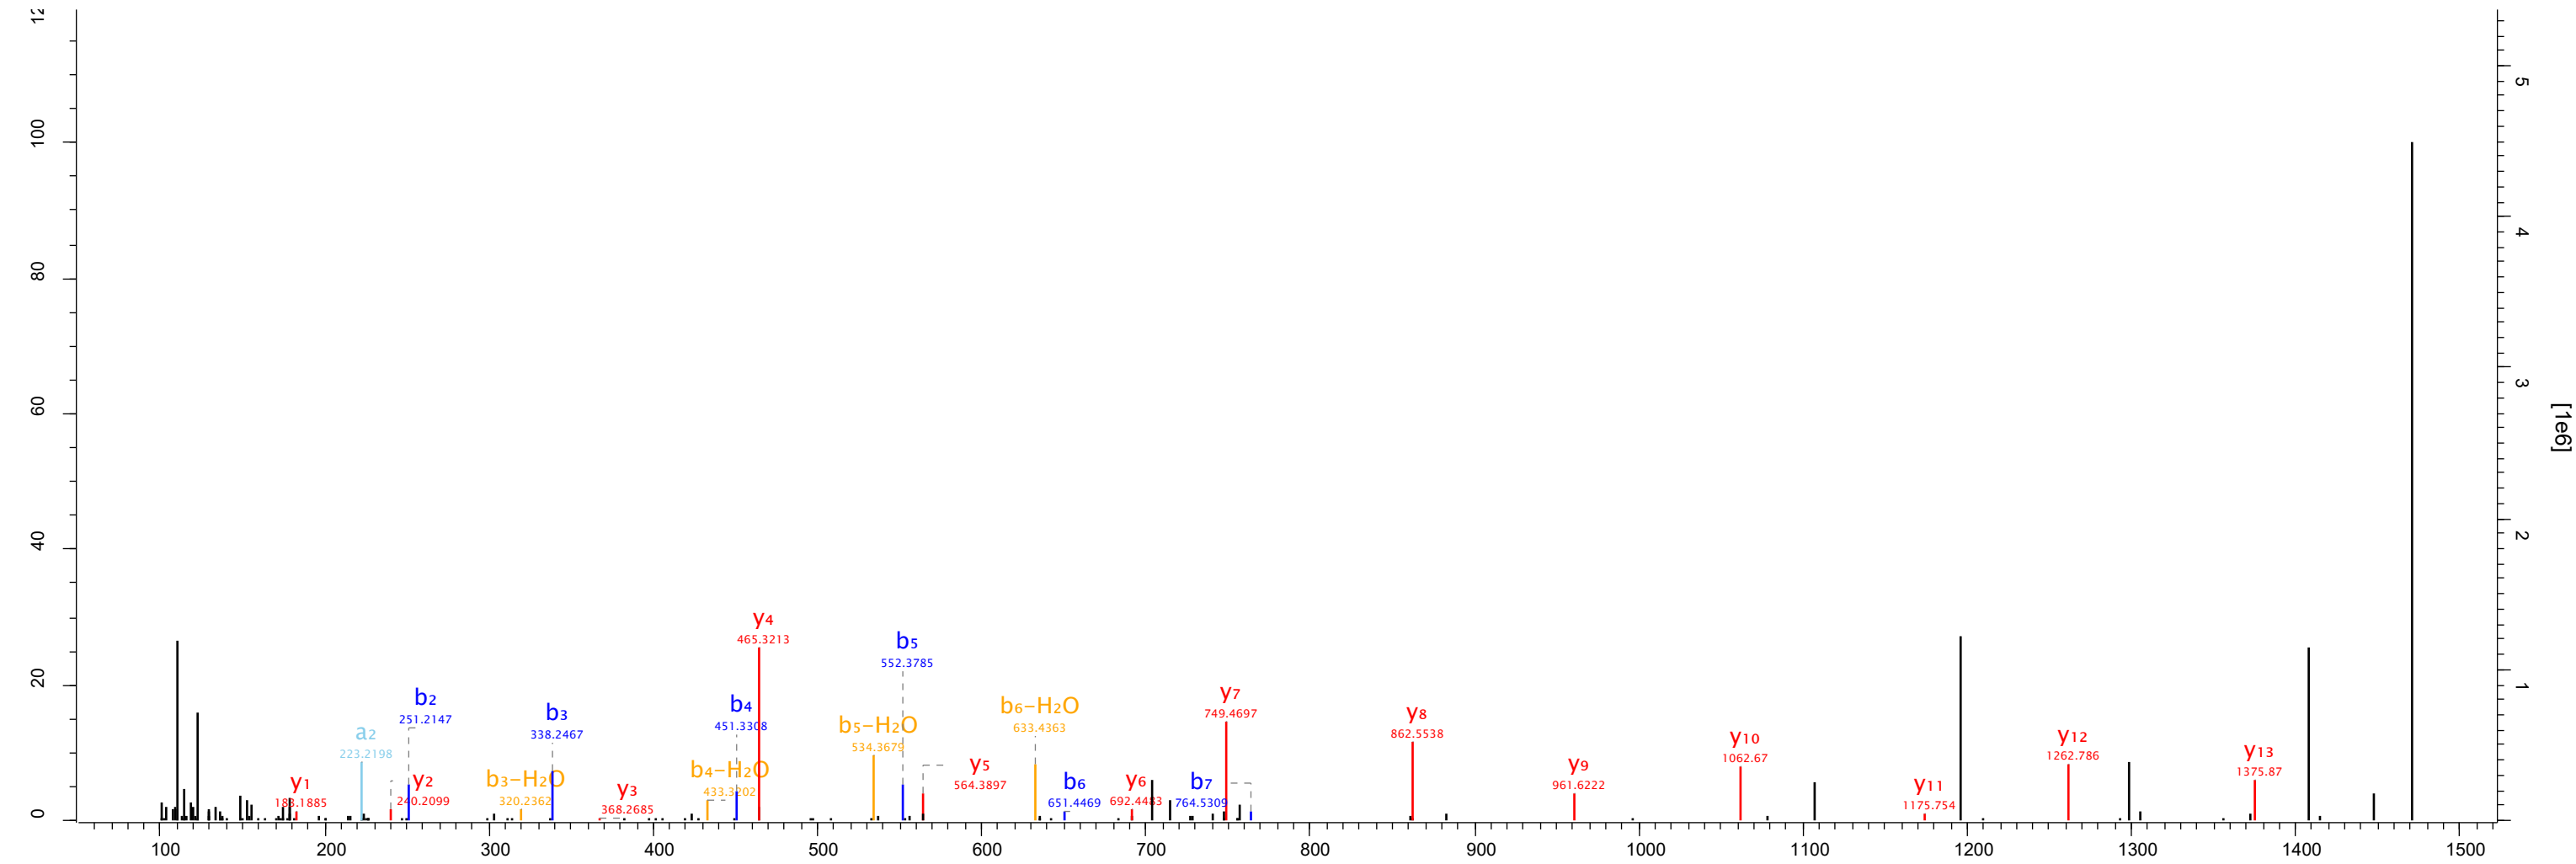

- T I S I T V L G Q V P Q G K -

b<sub>2</sub> b<sub>3</sub> b<sub>4</sub> b<sub>5</sub> b<sub>6</sub> b<sub>7</sub>

y<sub>13</sub> y<sub>12</sub> y<sub>11</sub> y<sub>10</sub> y<sub>9</sub> y<sub>8</sub> y<sub>7</sub> y<sub>6</sub> y<sub>5</sub> y<sub>4</sub> y<sub>3</sub> y<sub>2</sub> y<sub>1</sub>

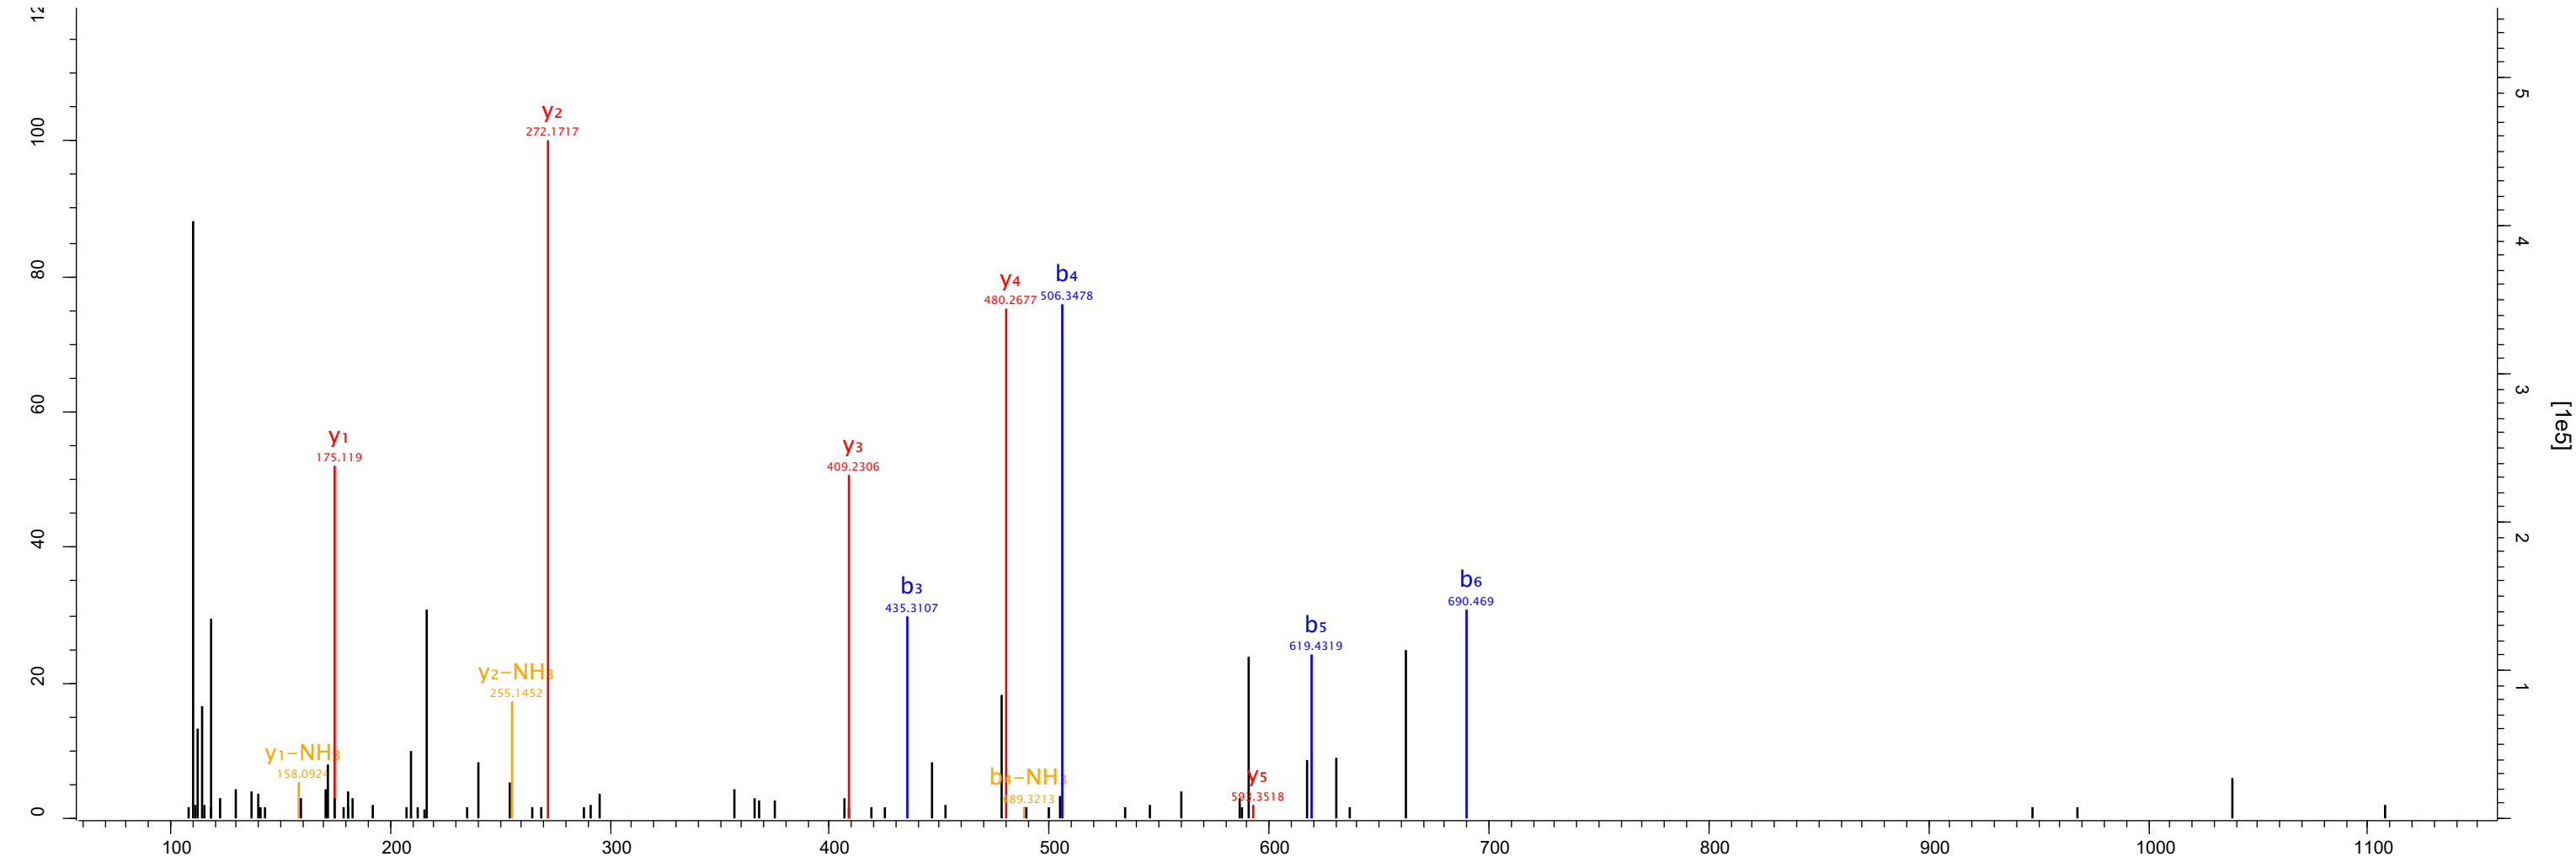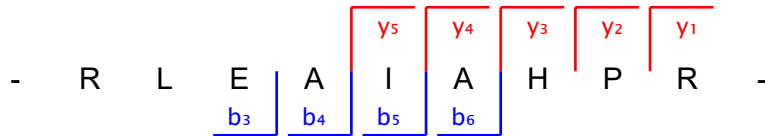



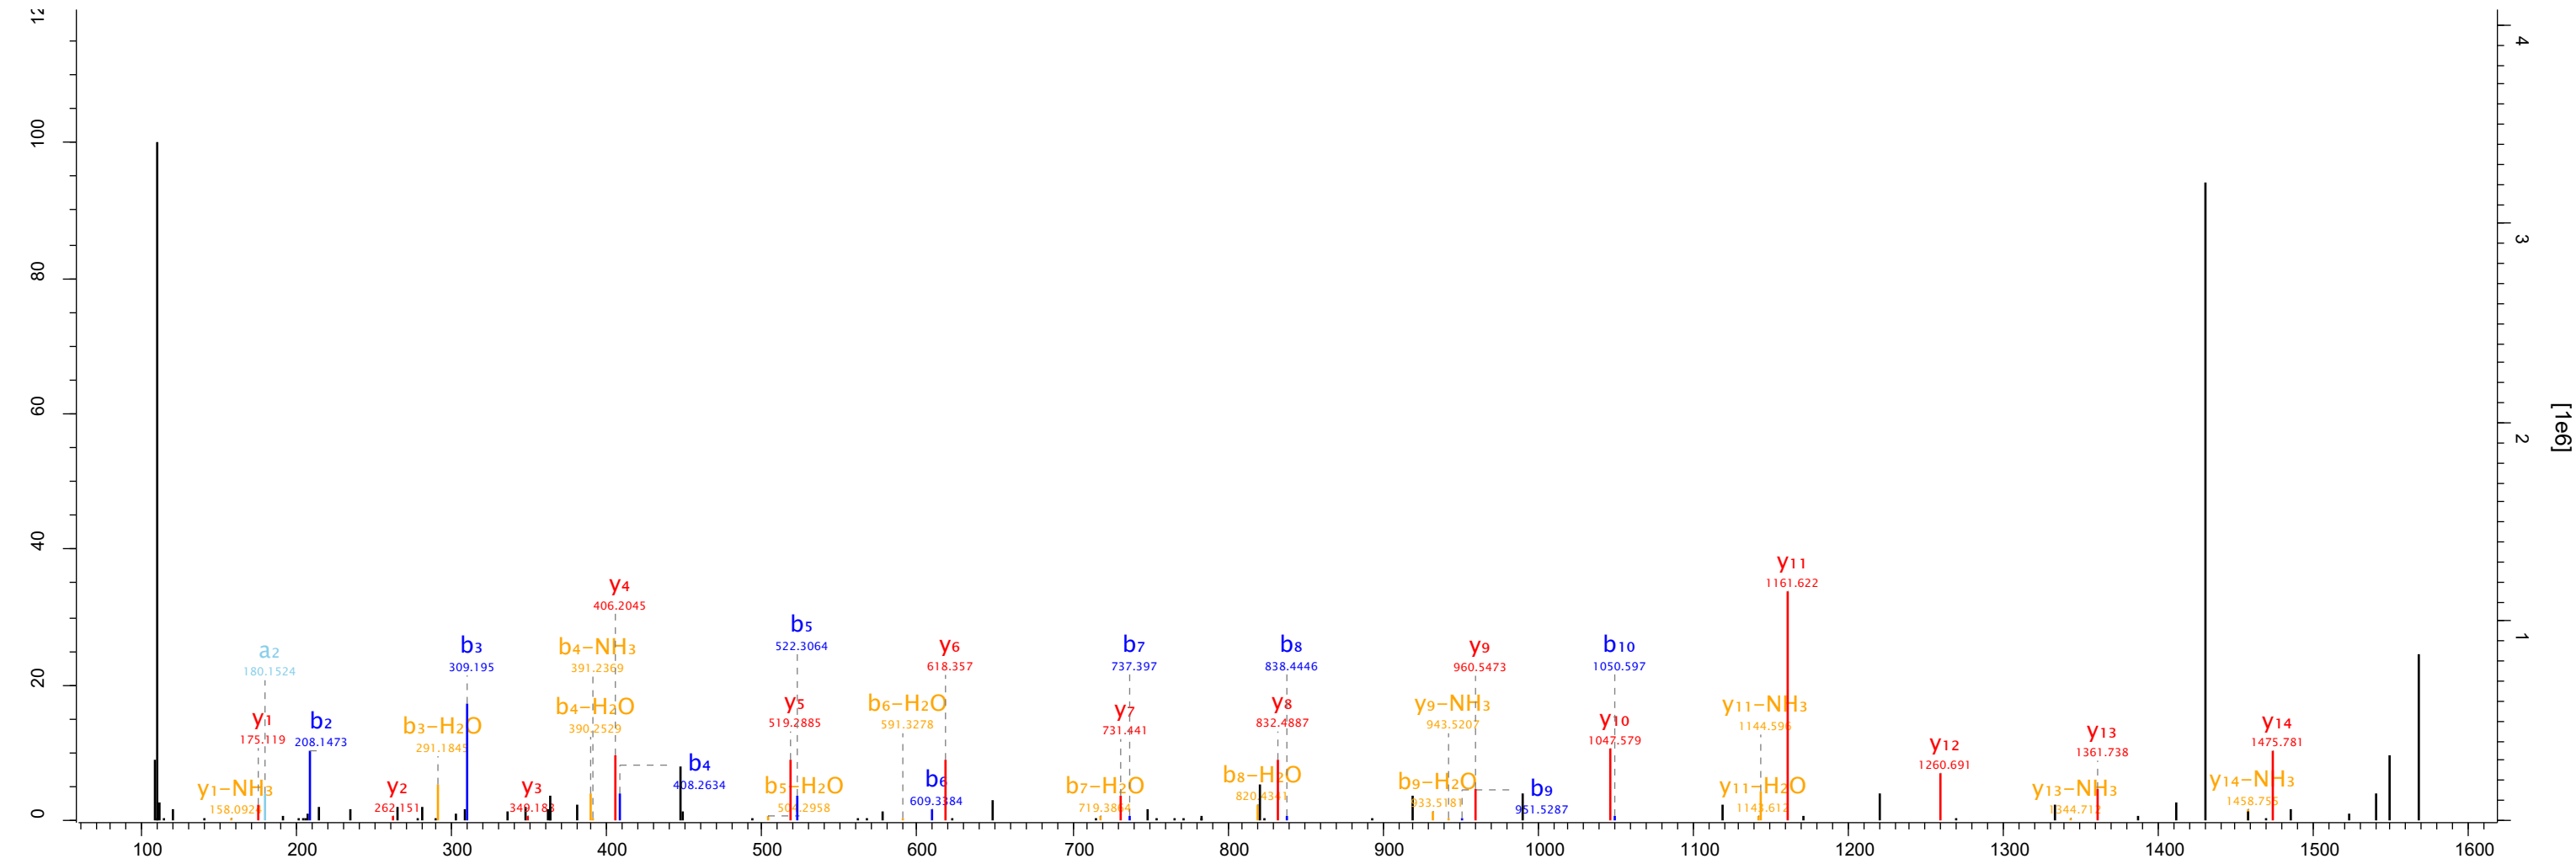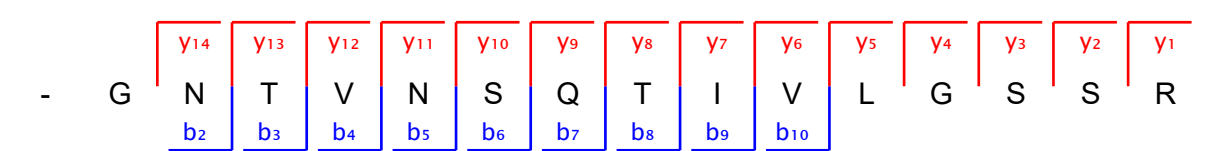

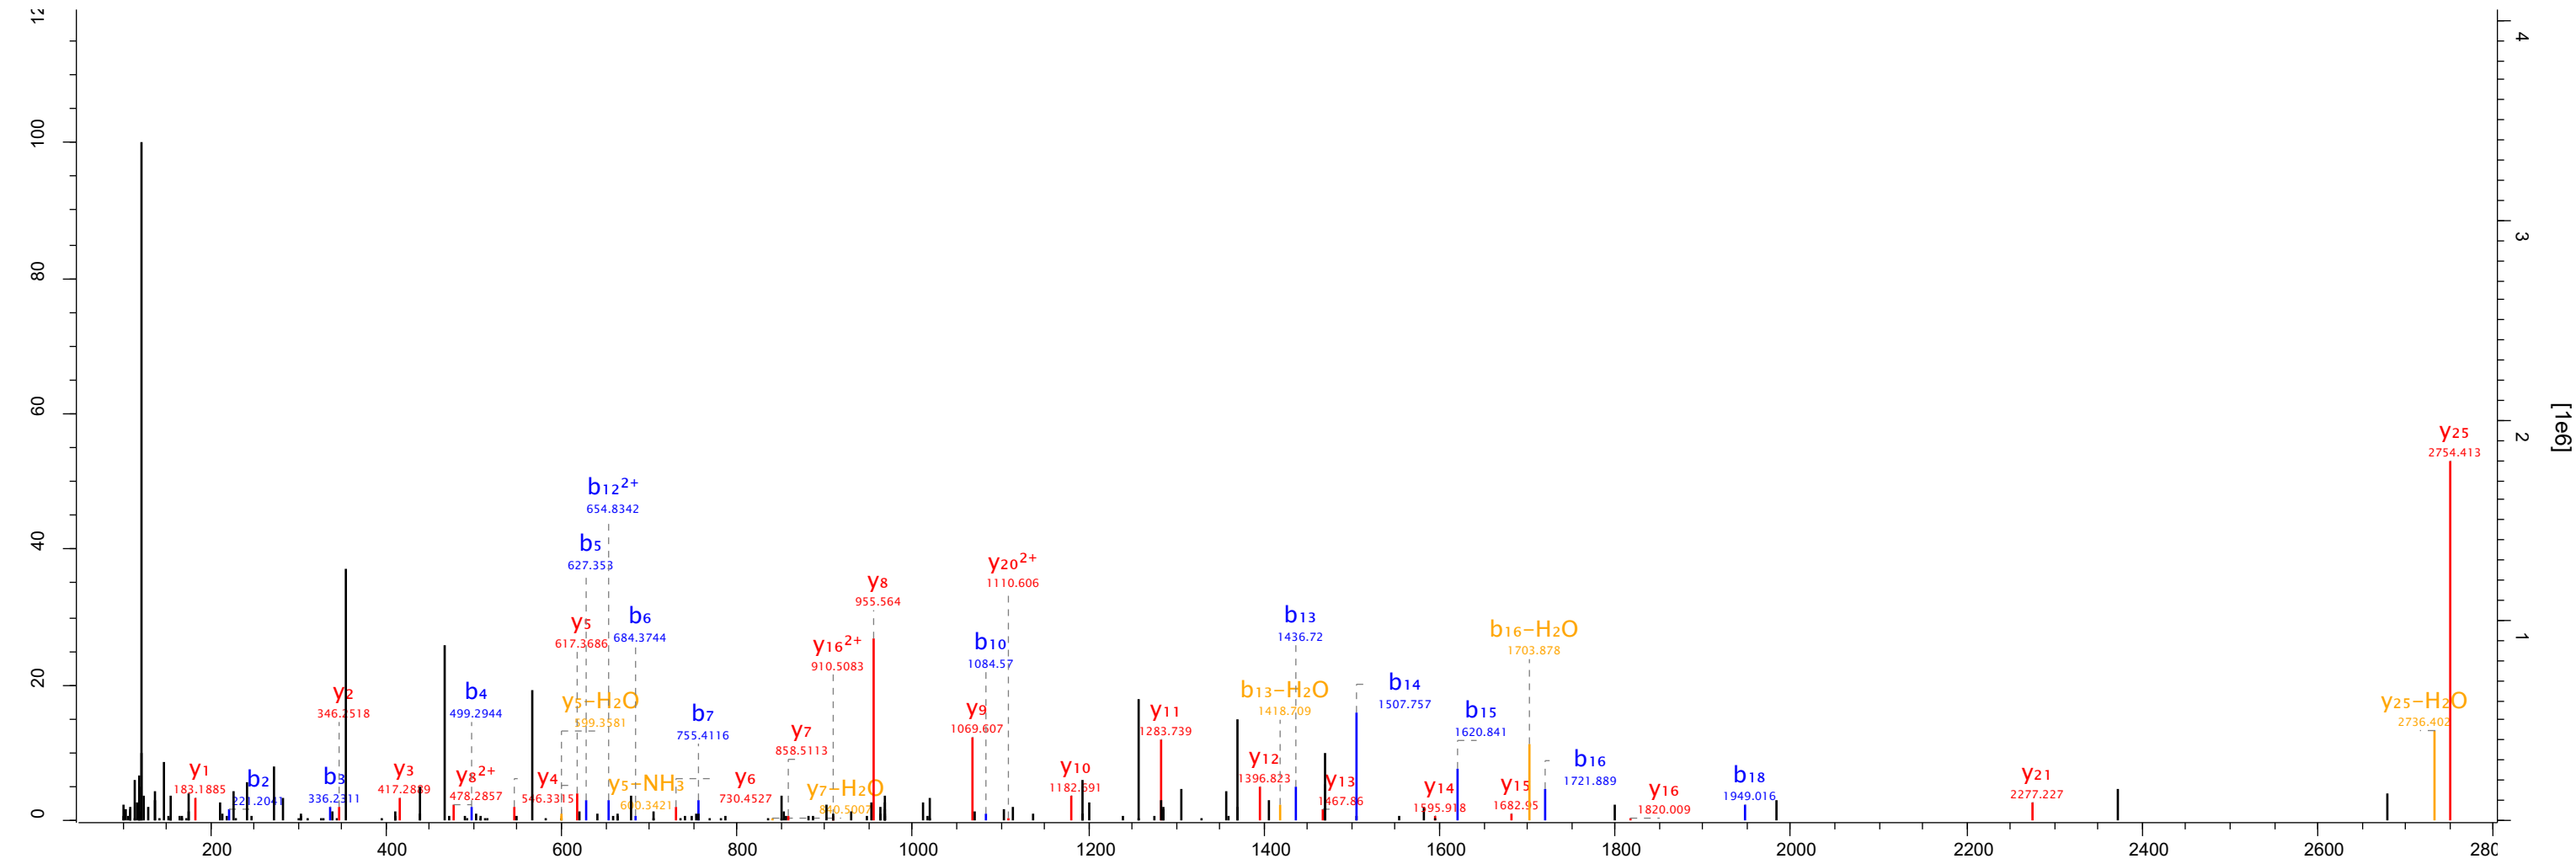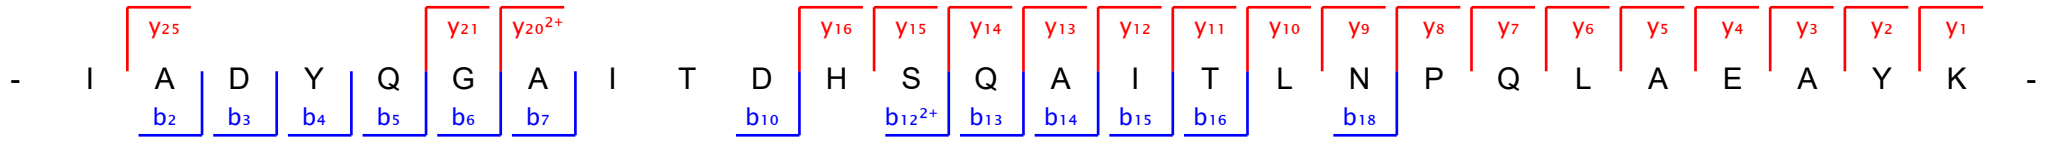

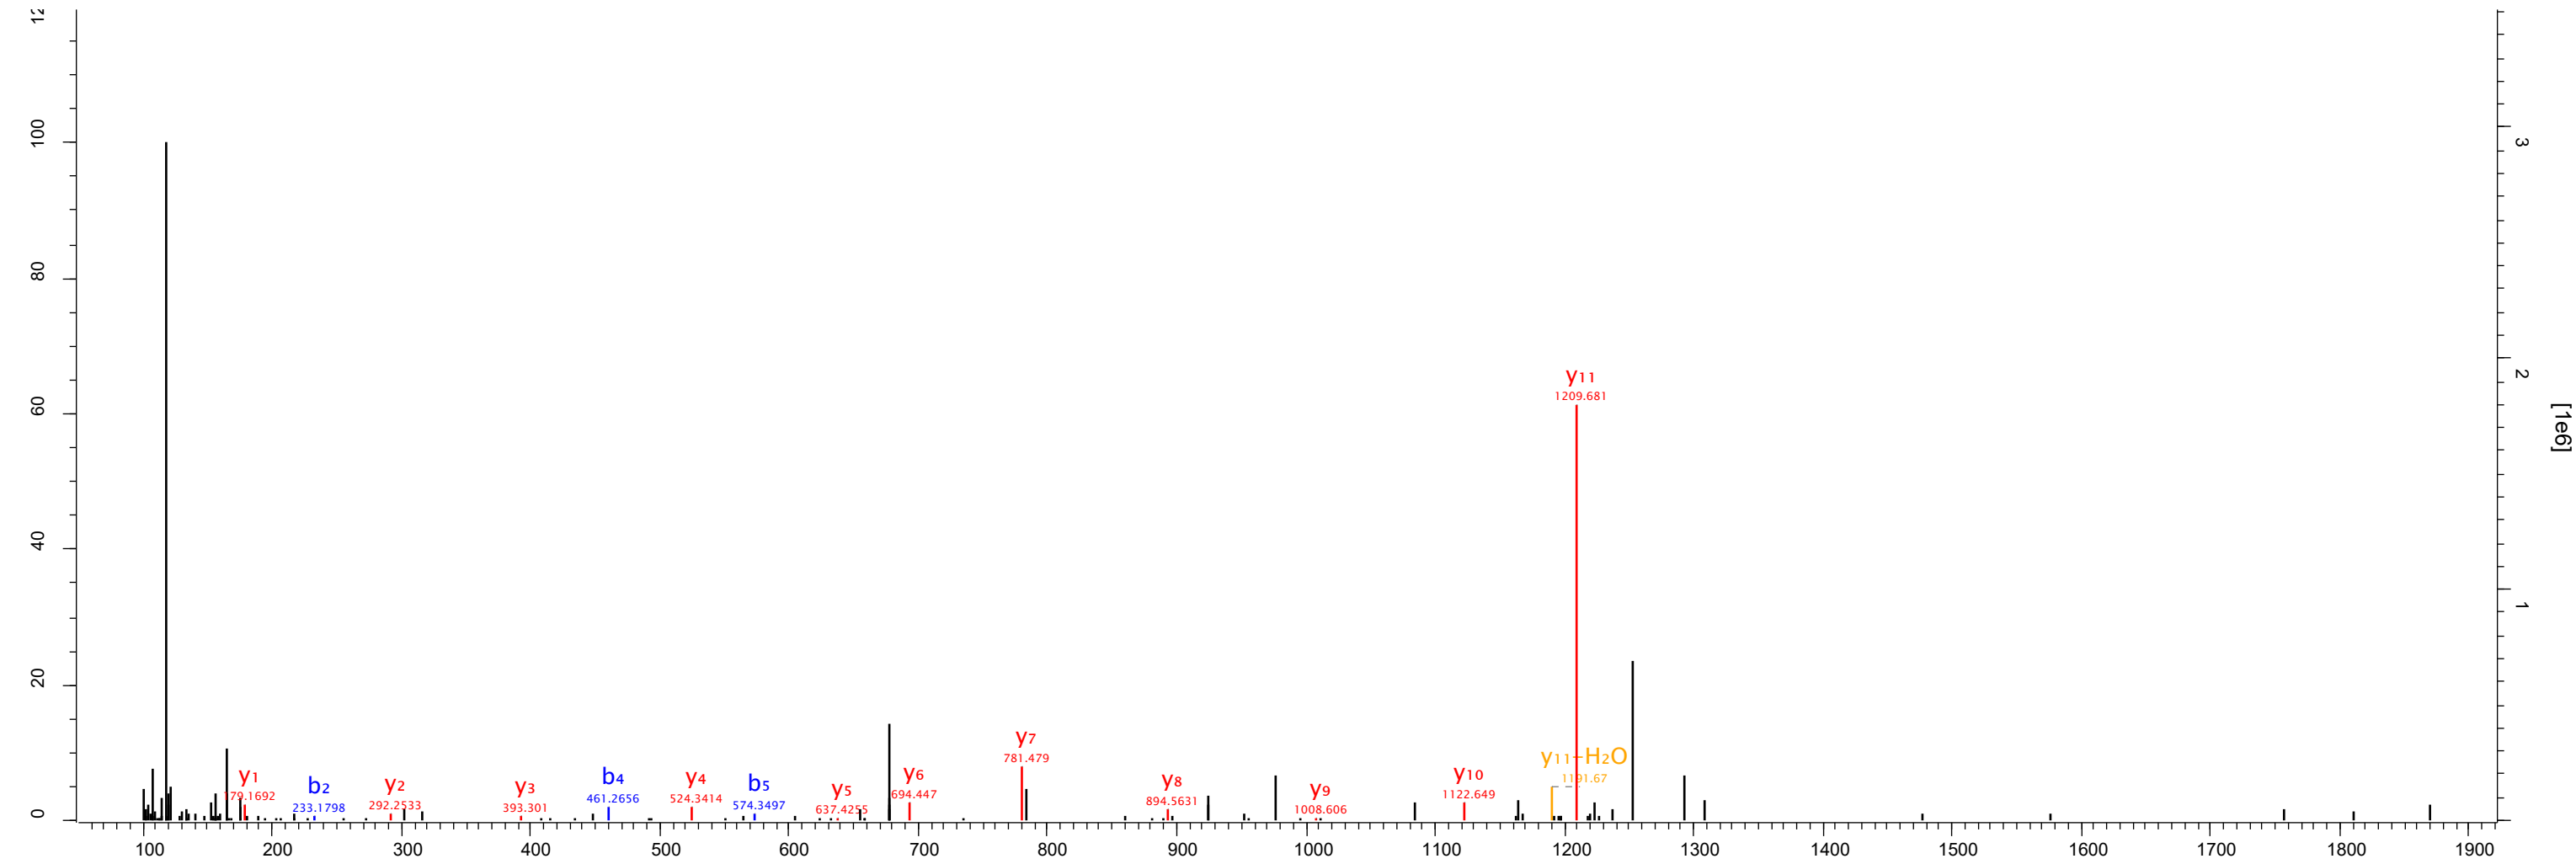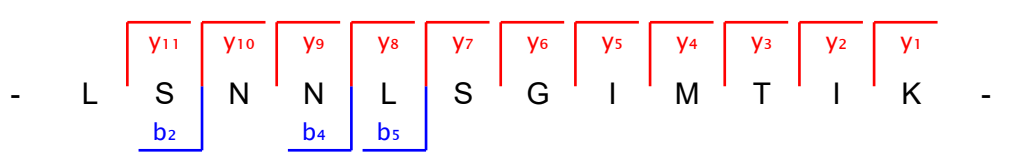

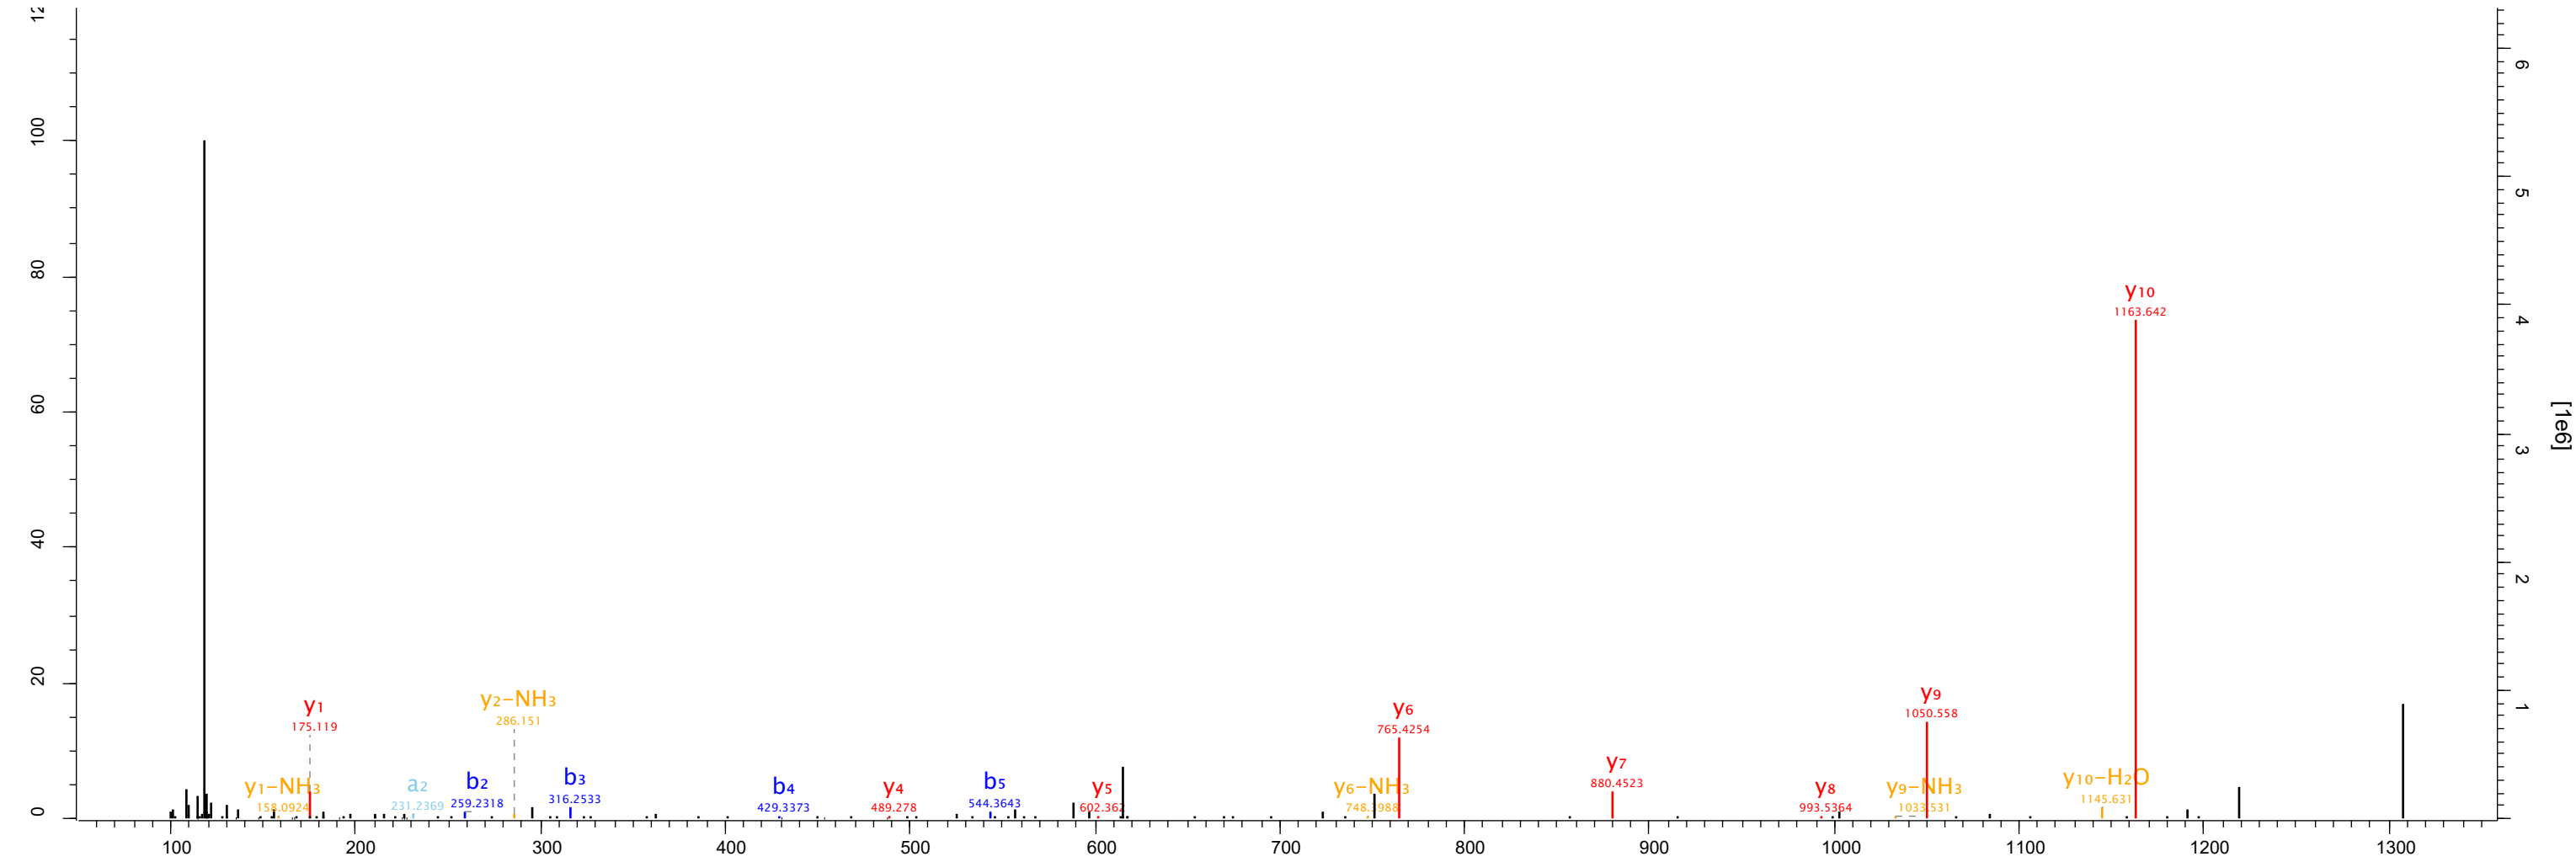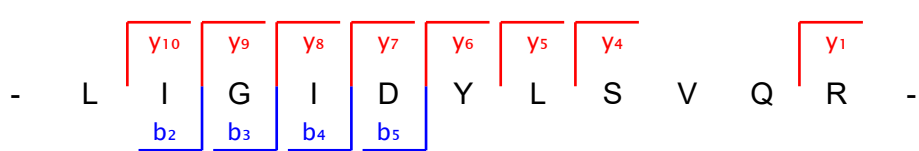

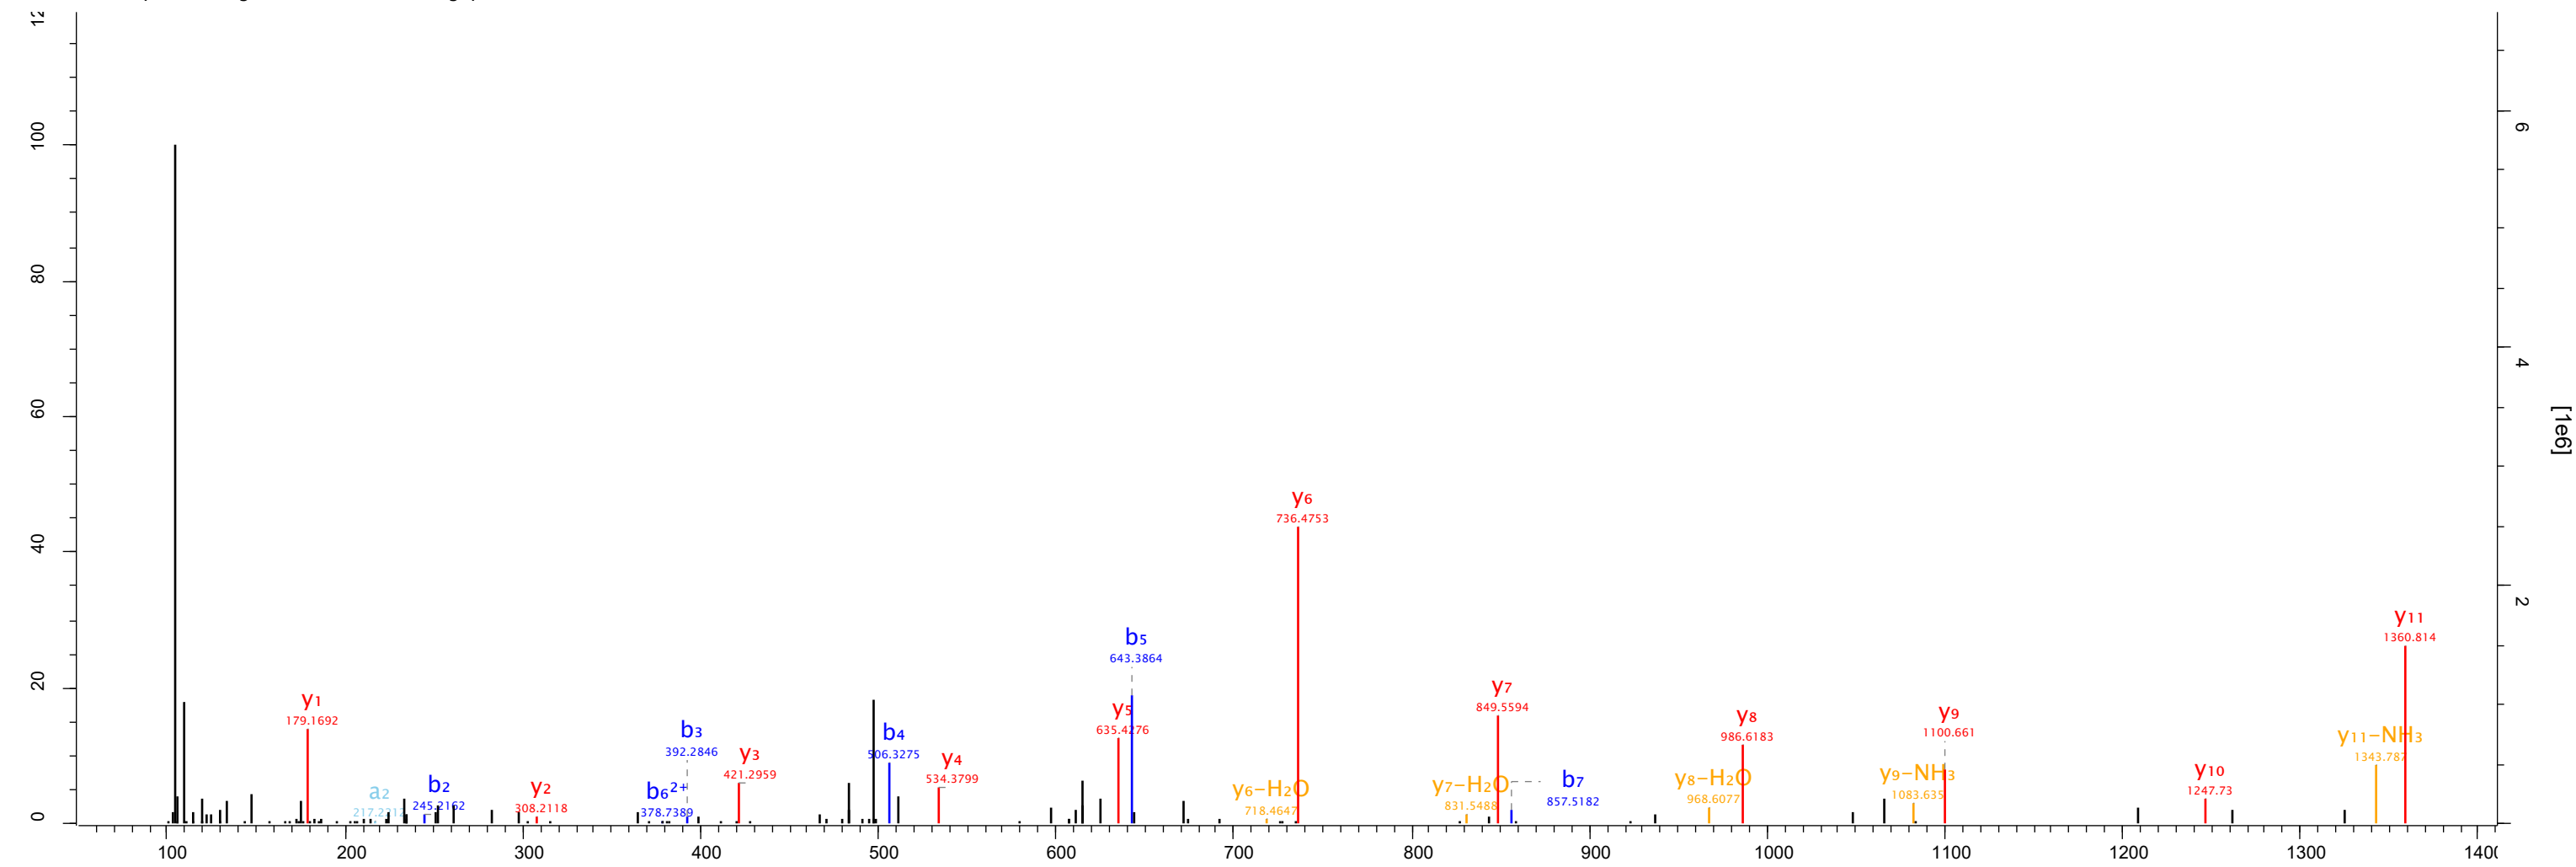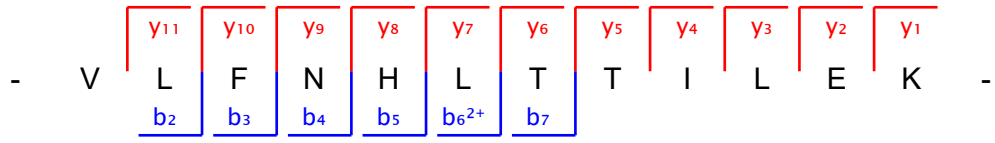

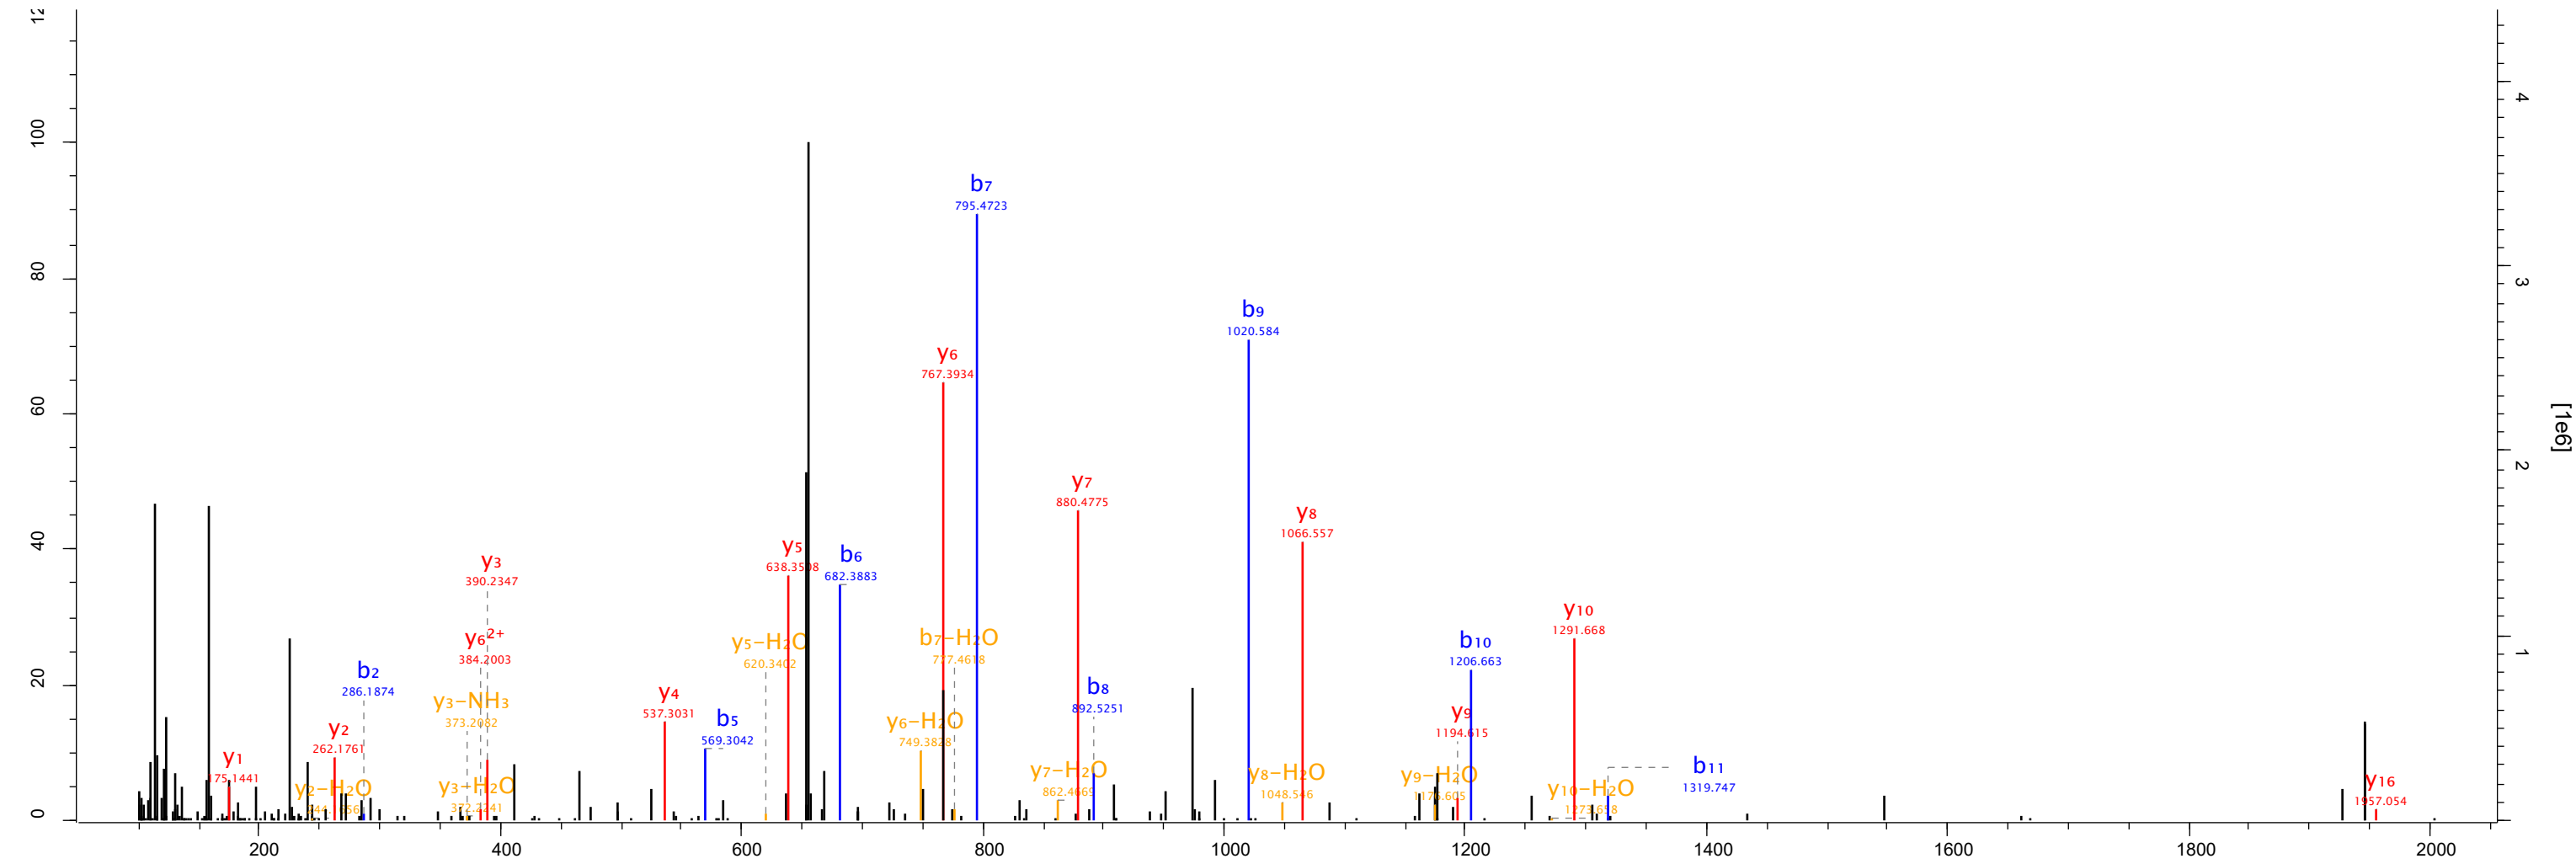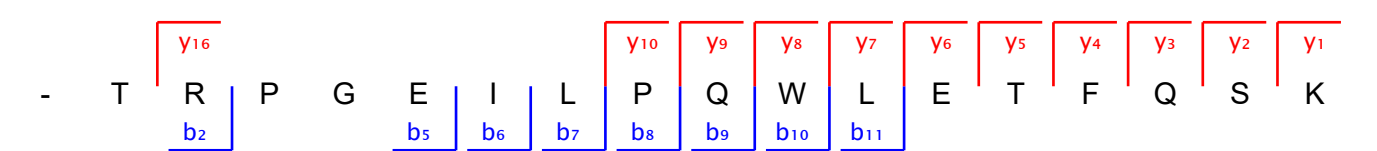

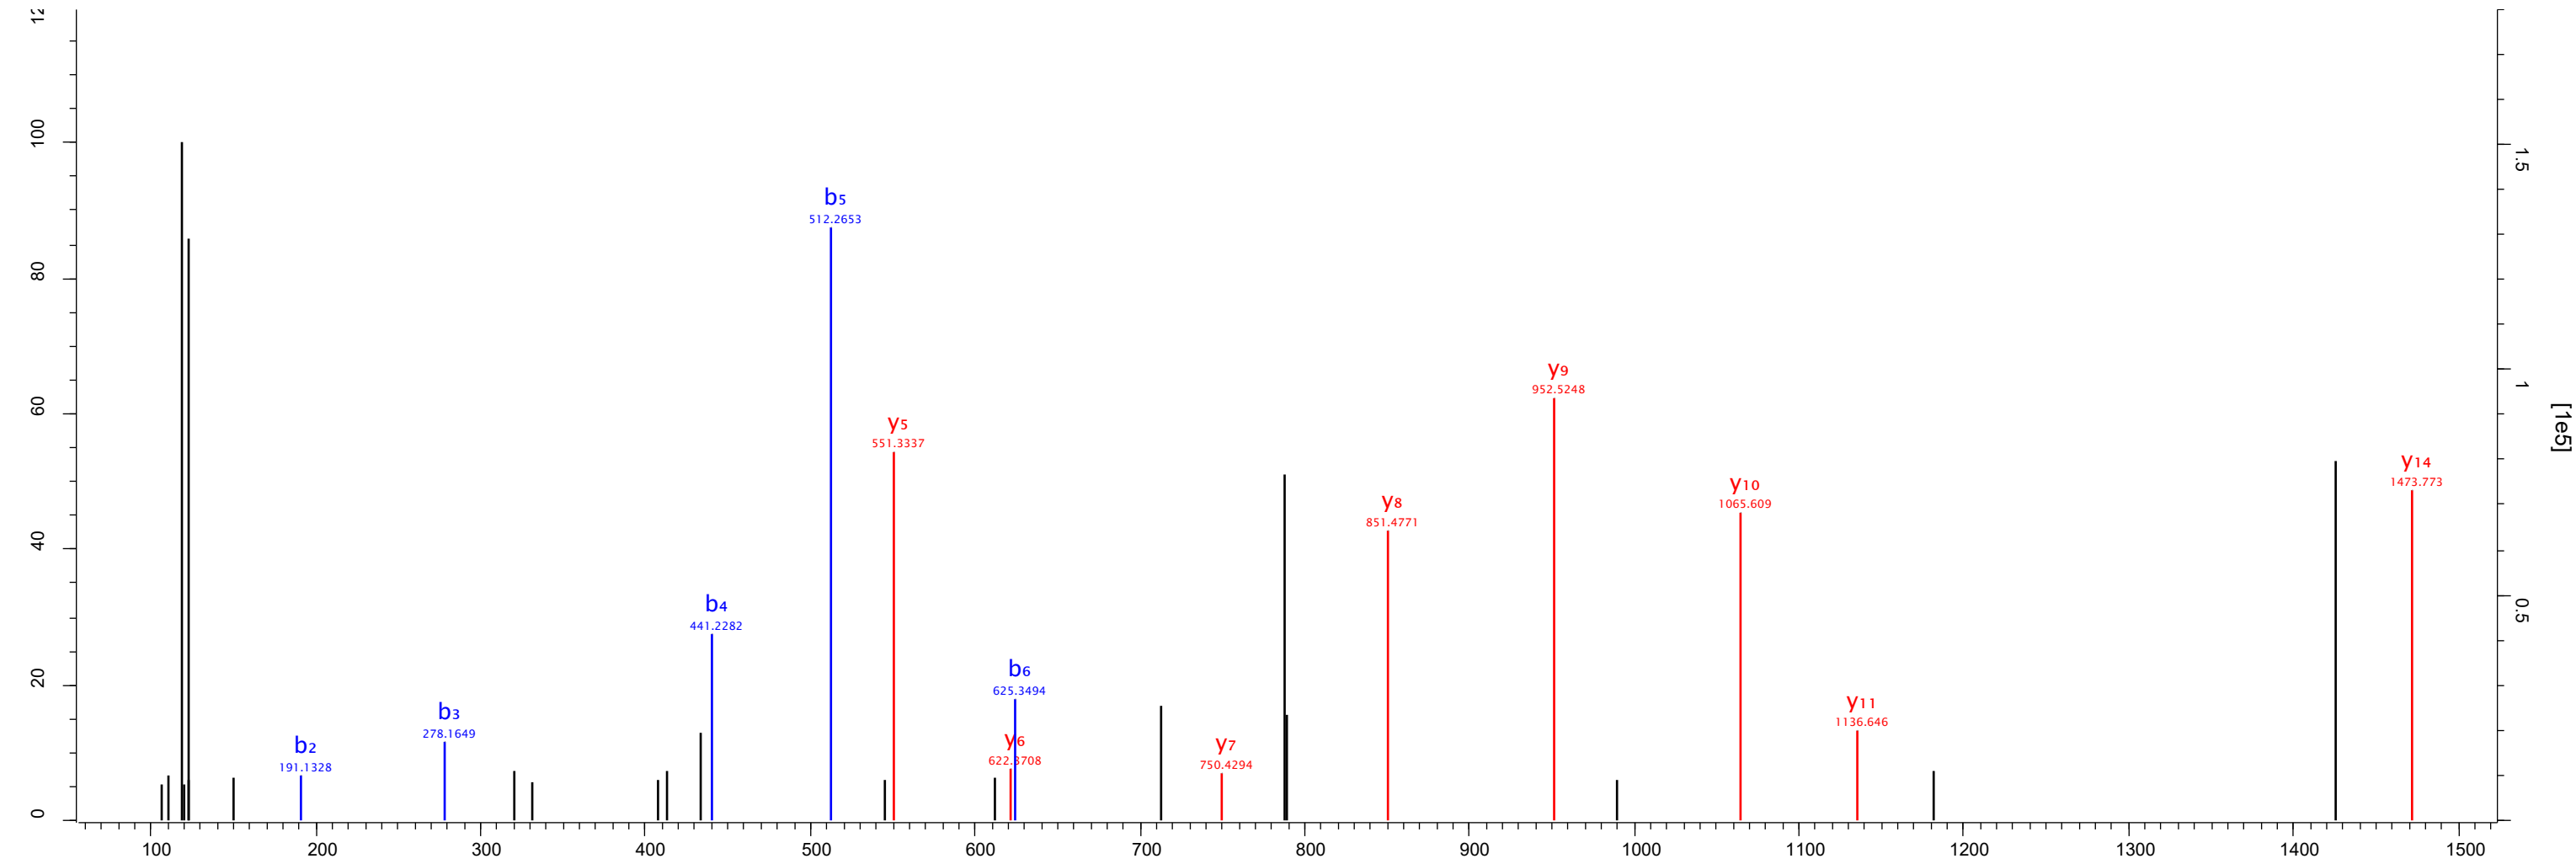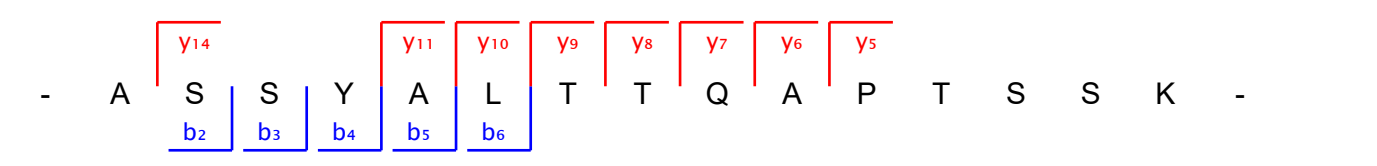

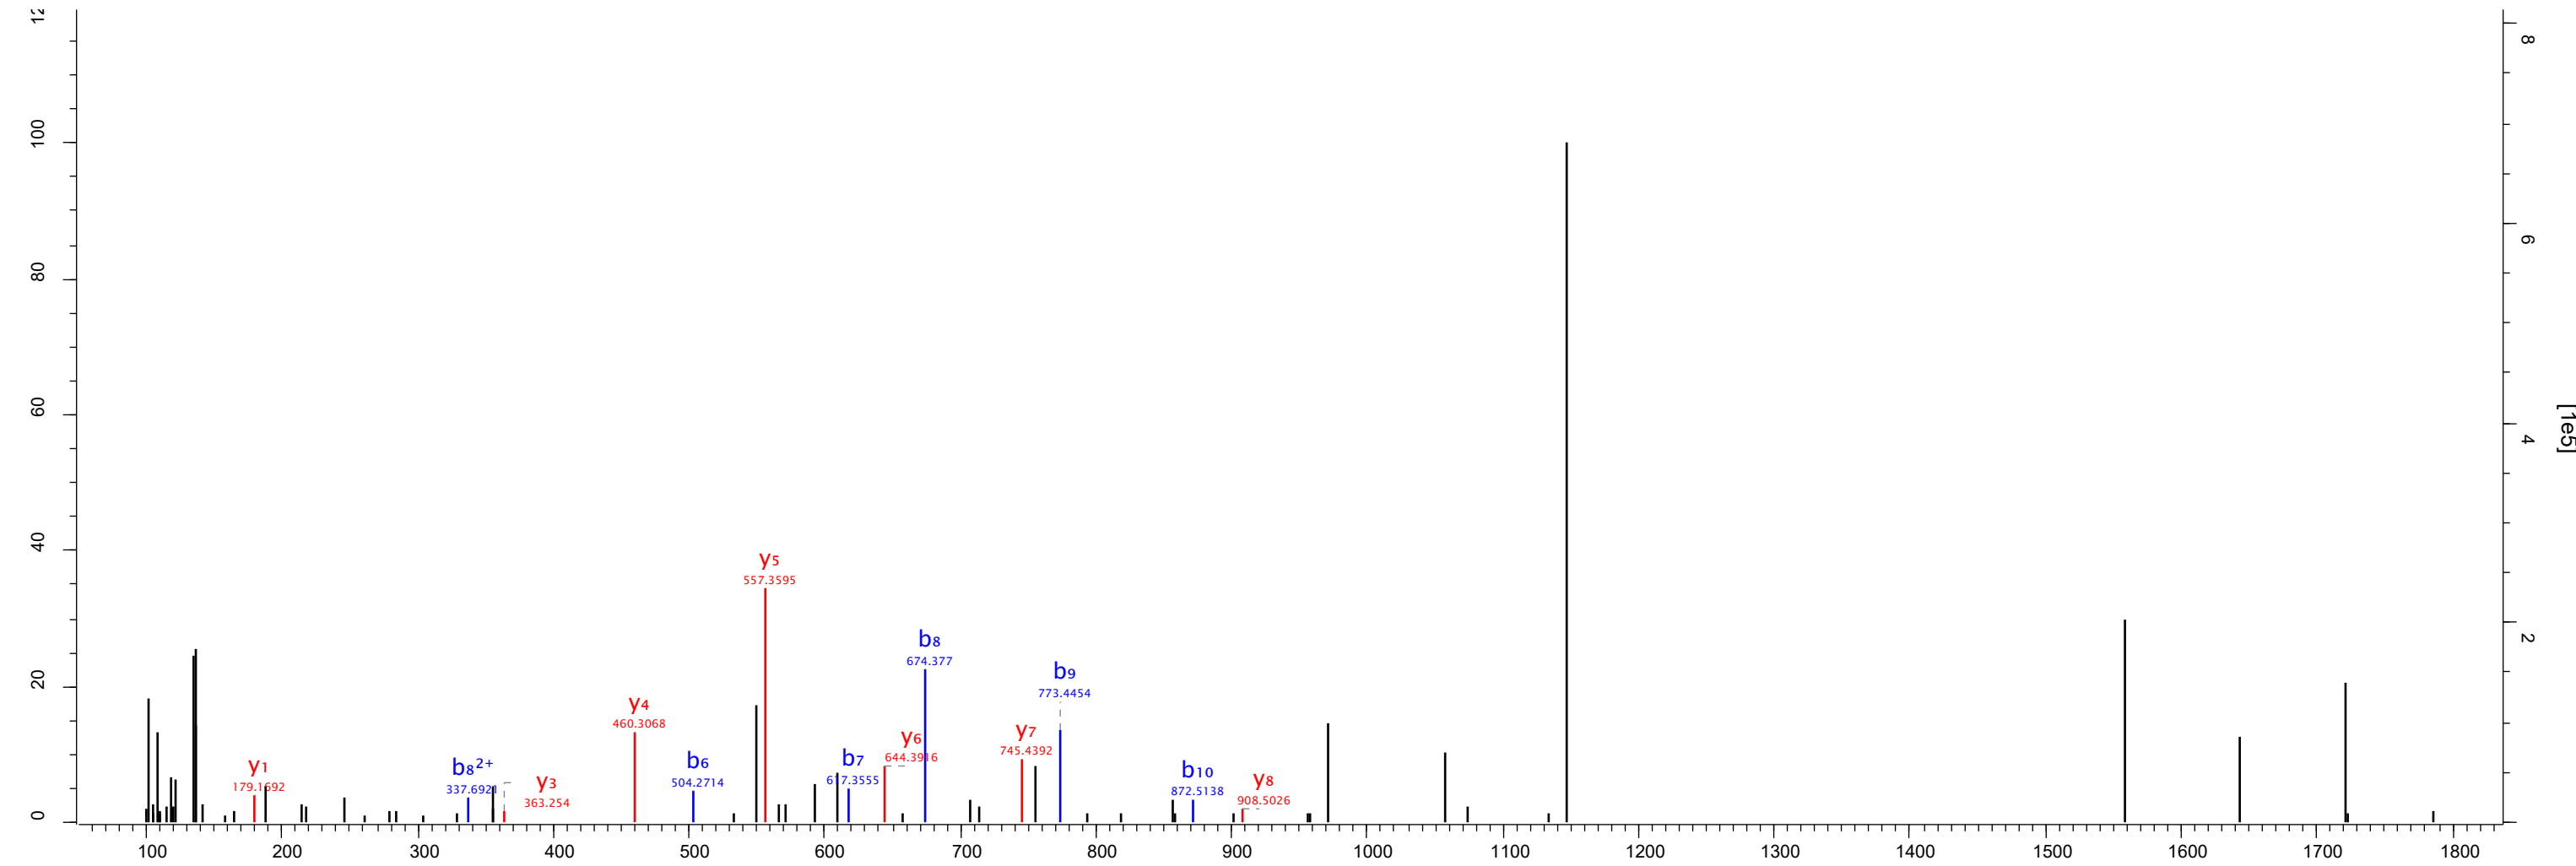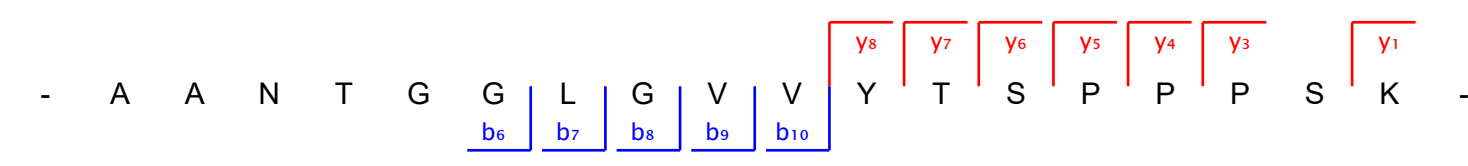



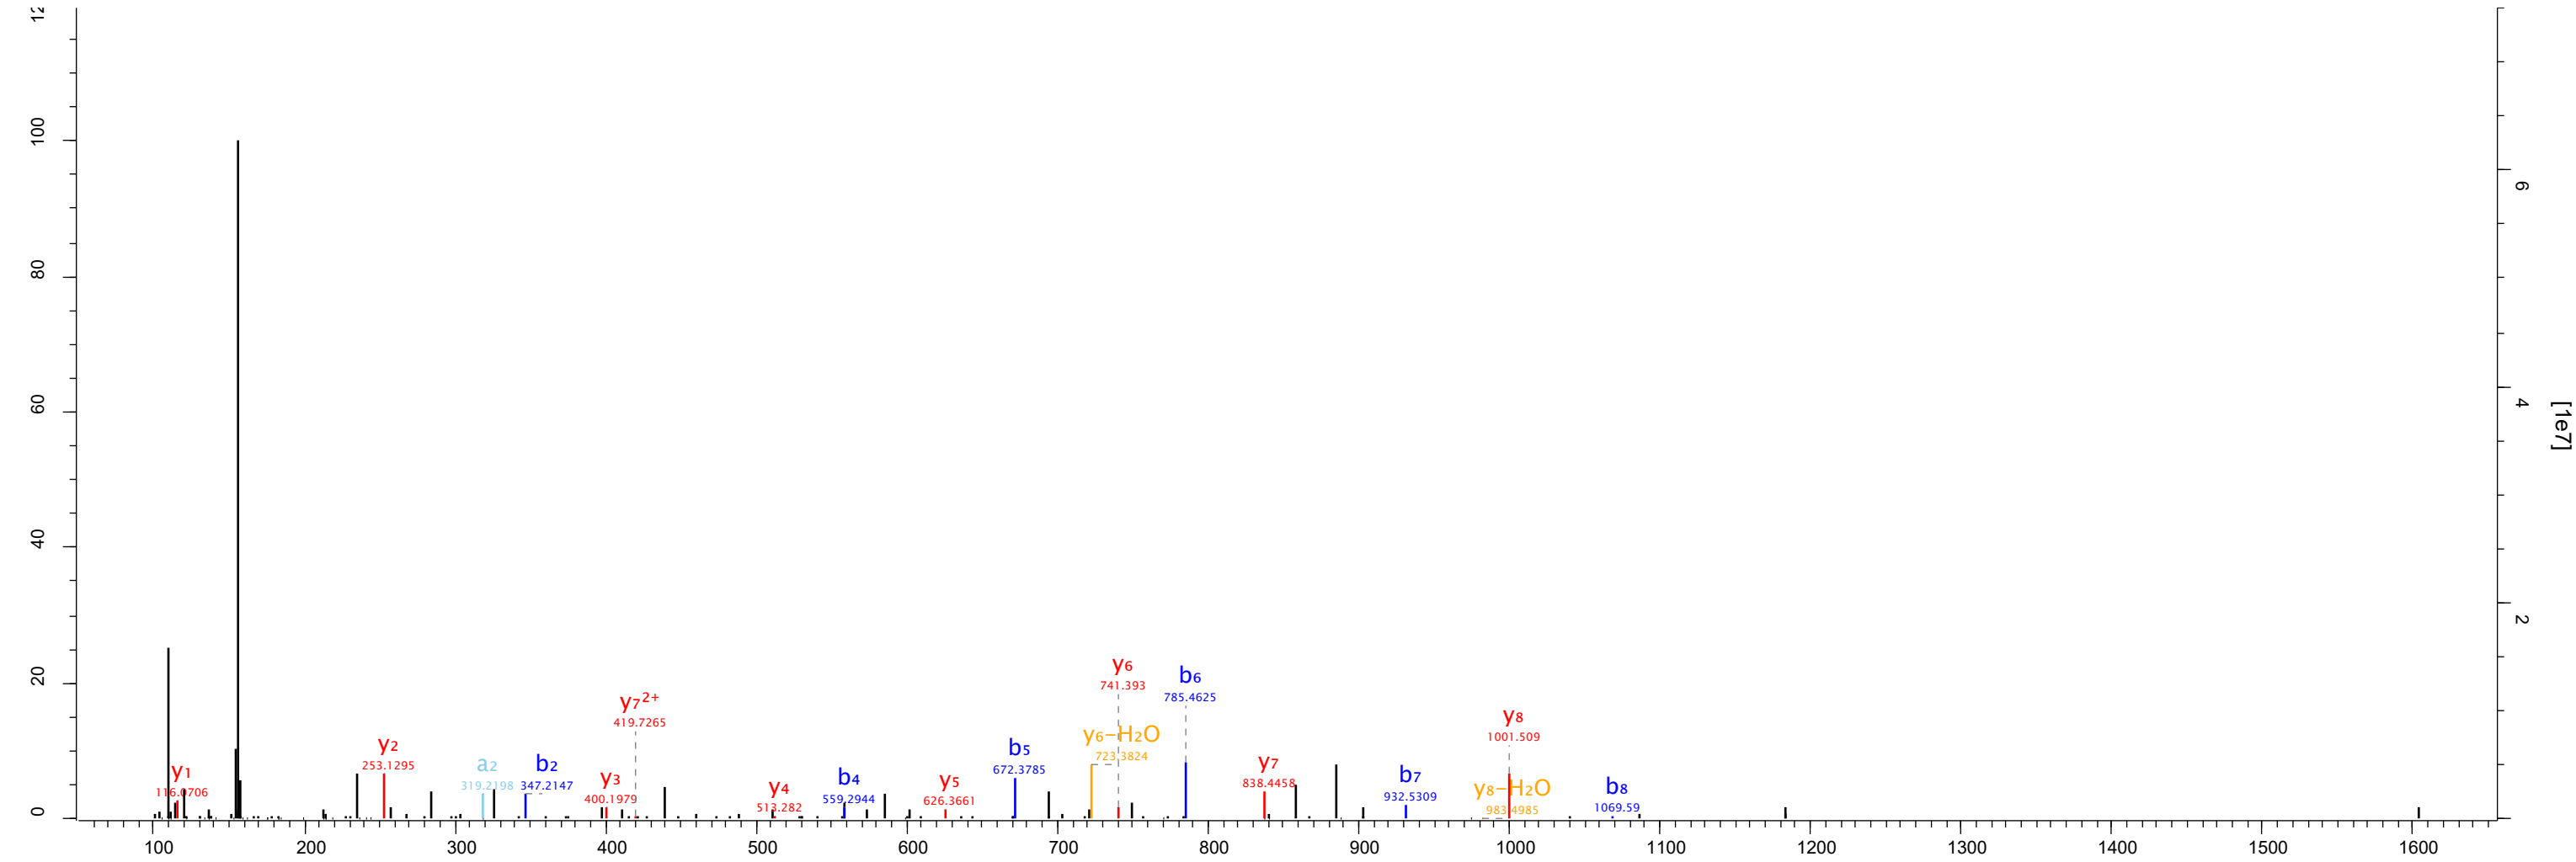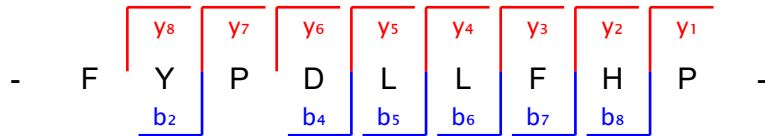

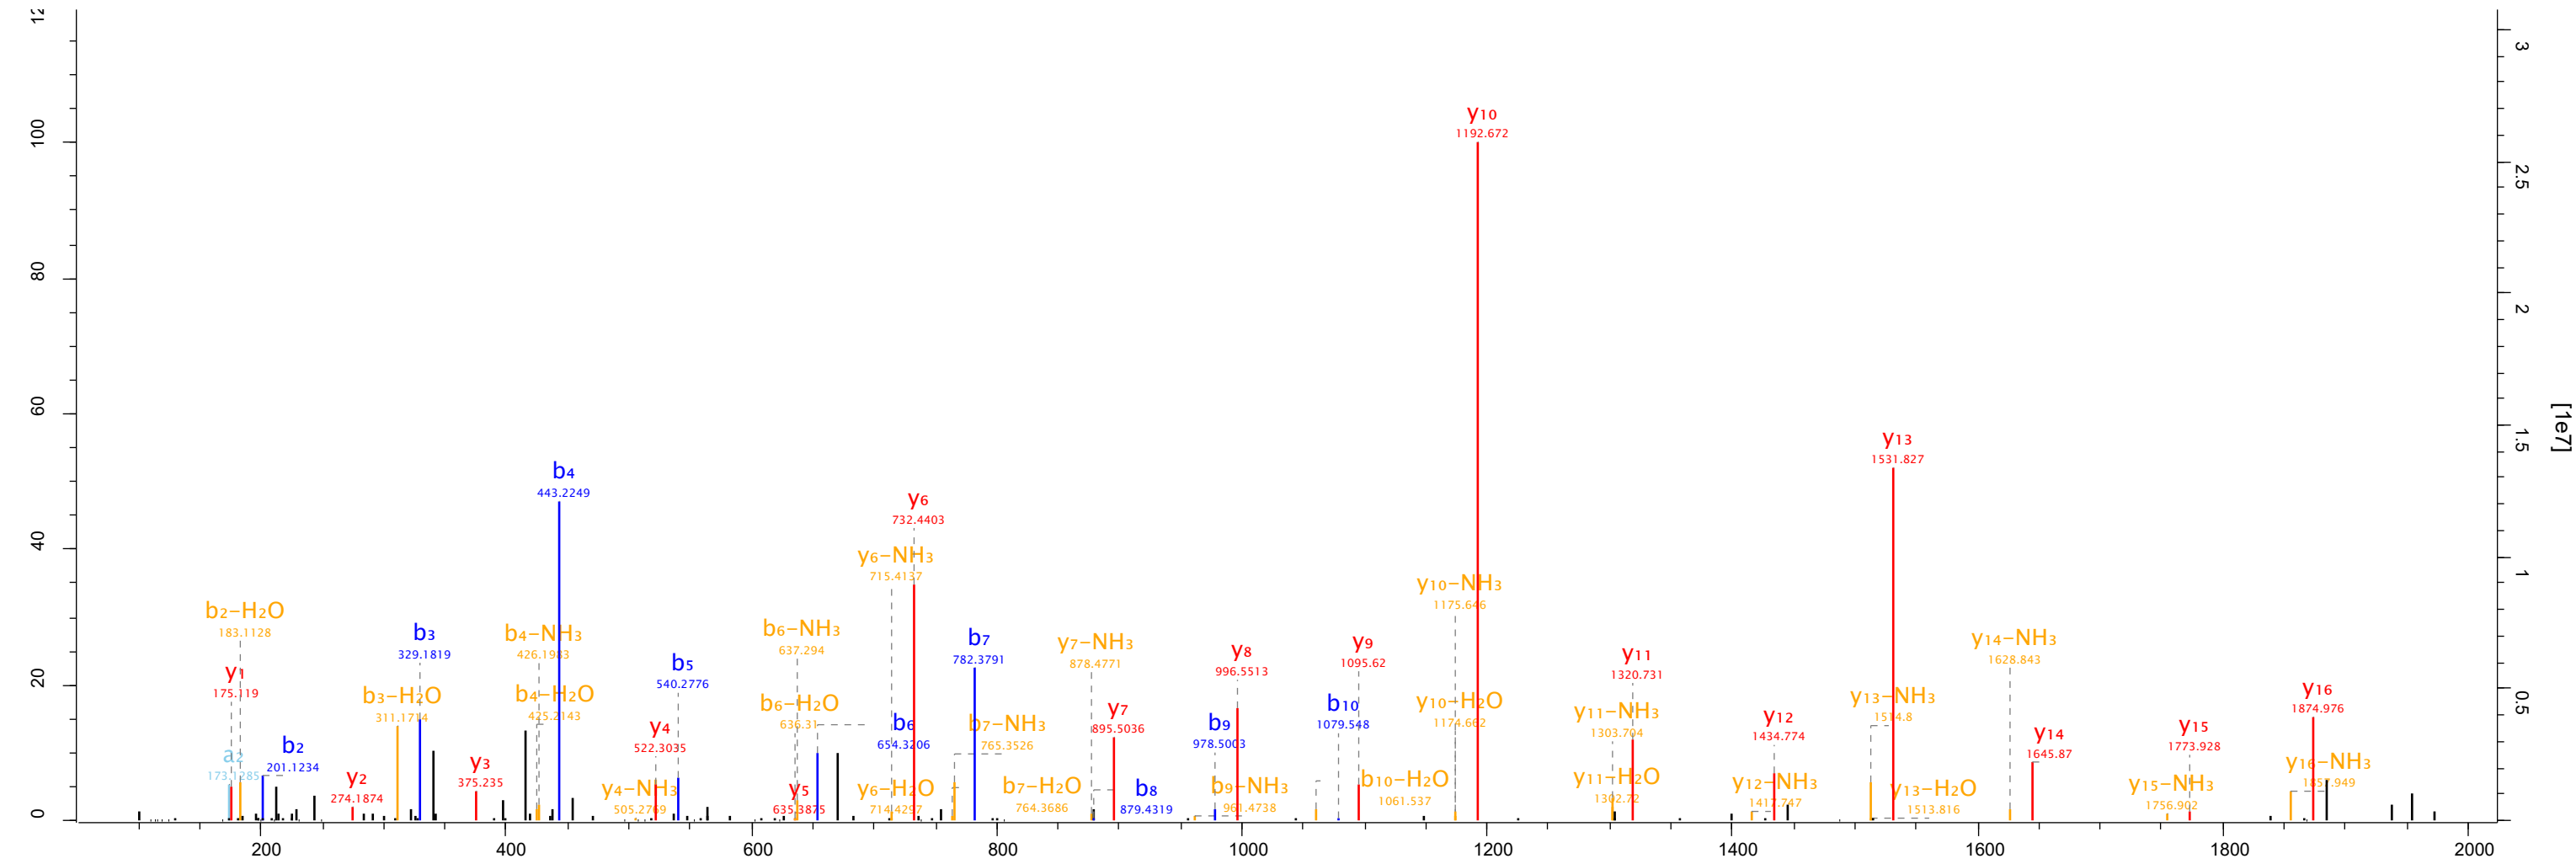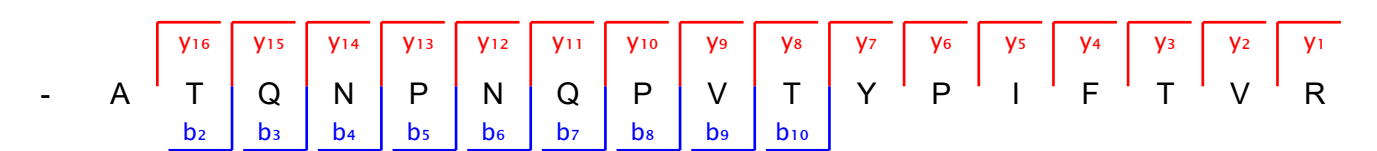

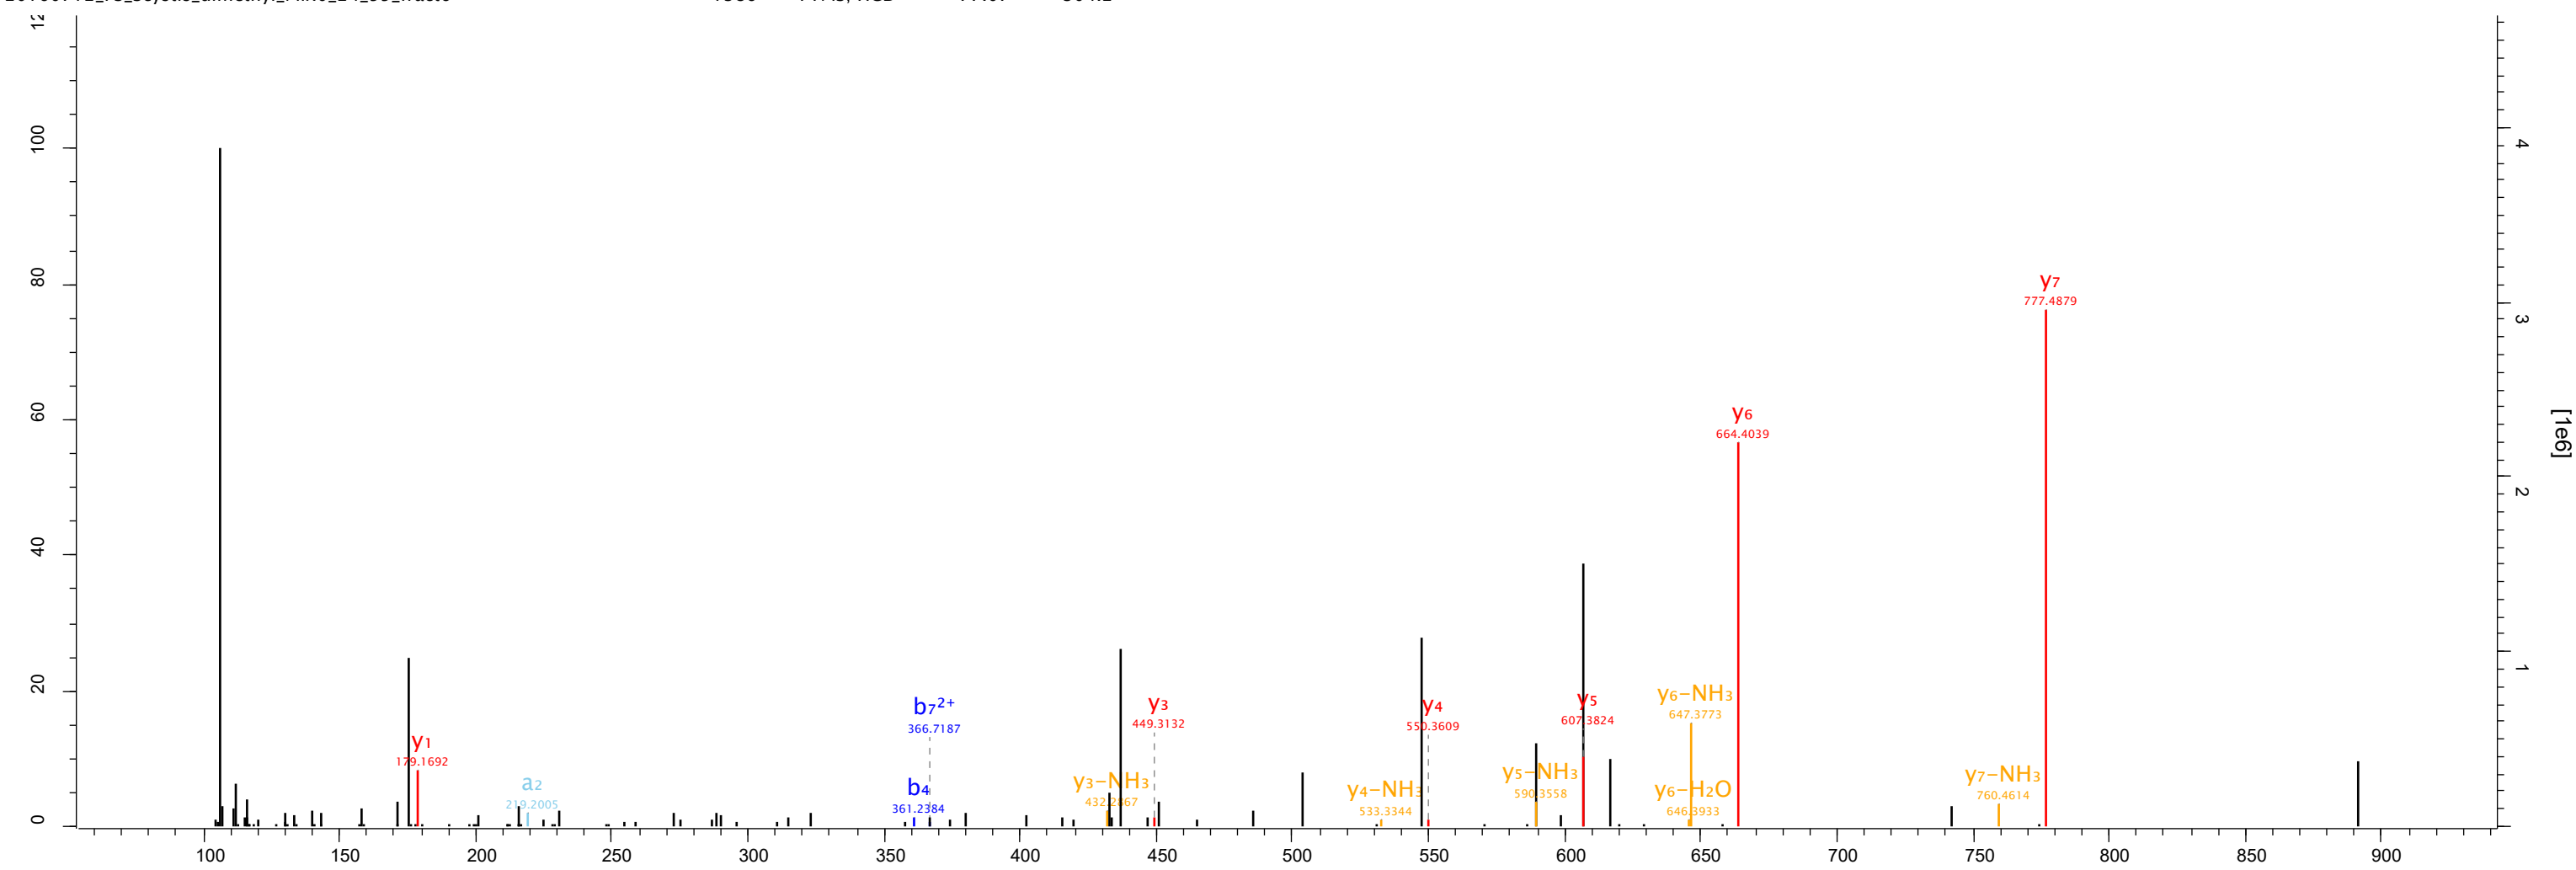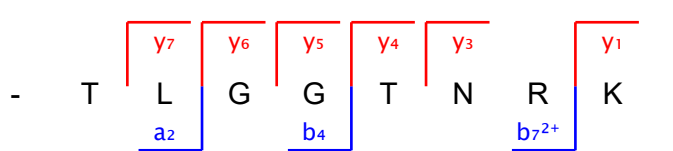

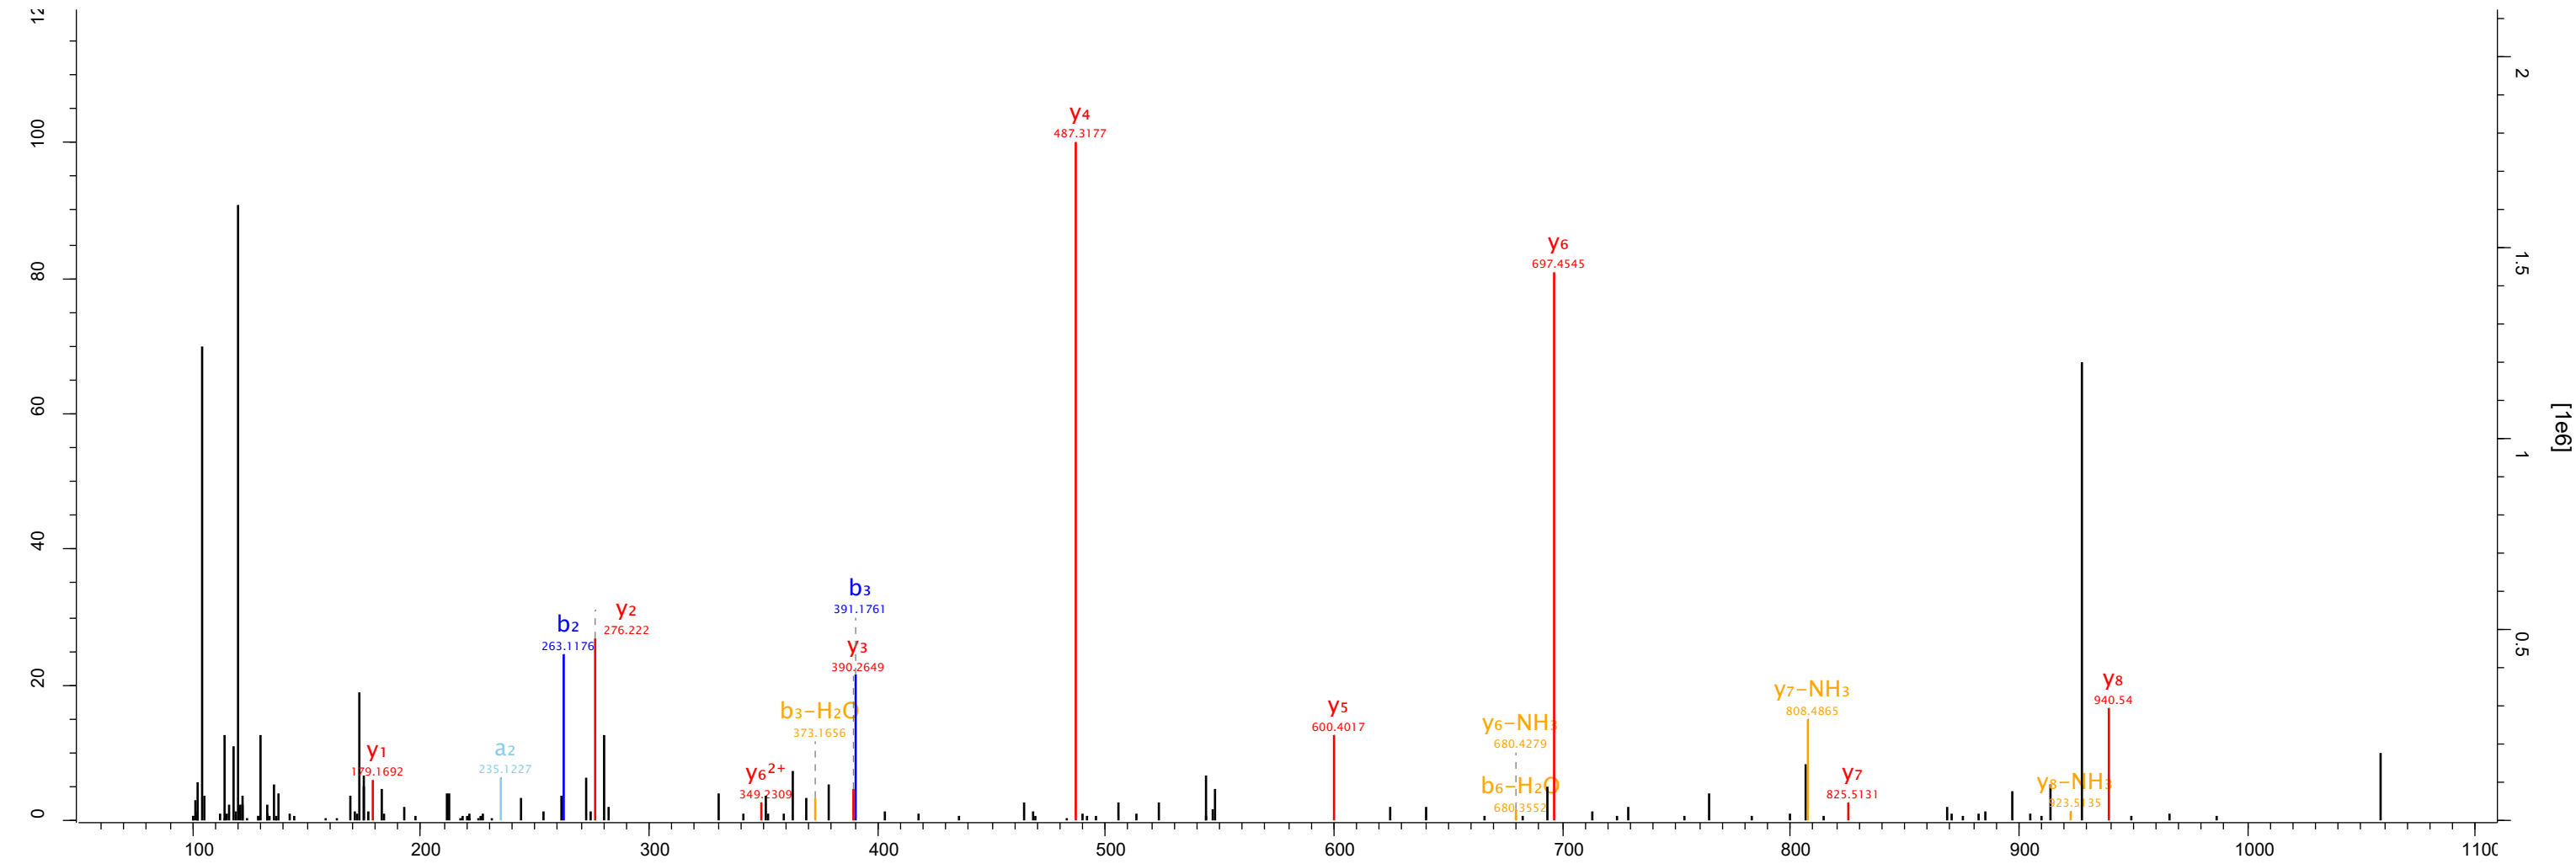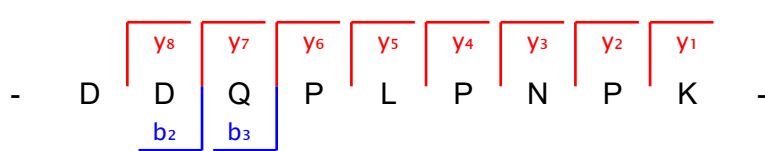

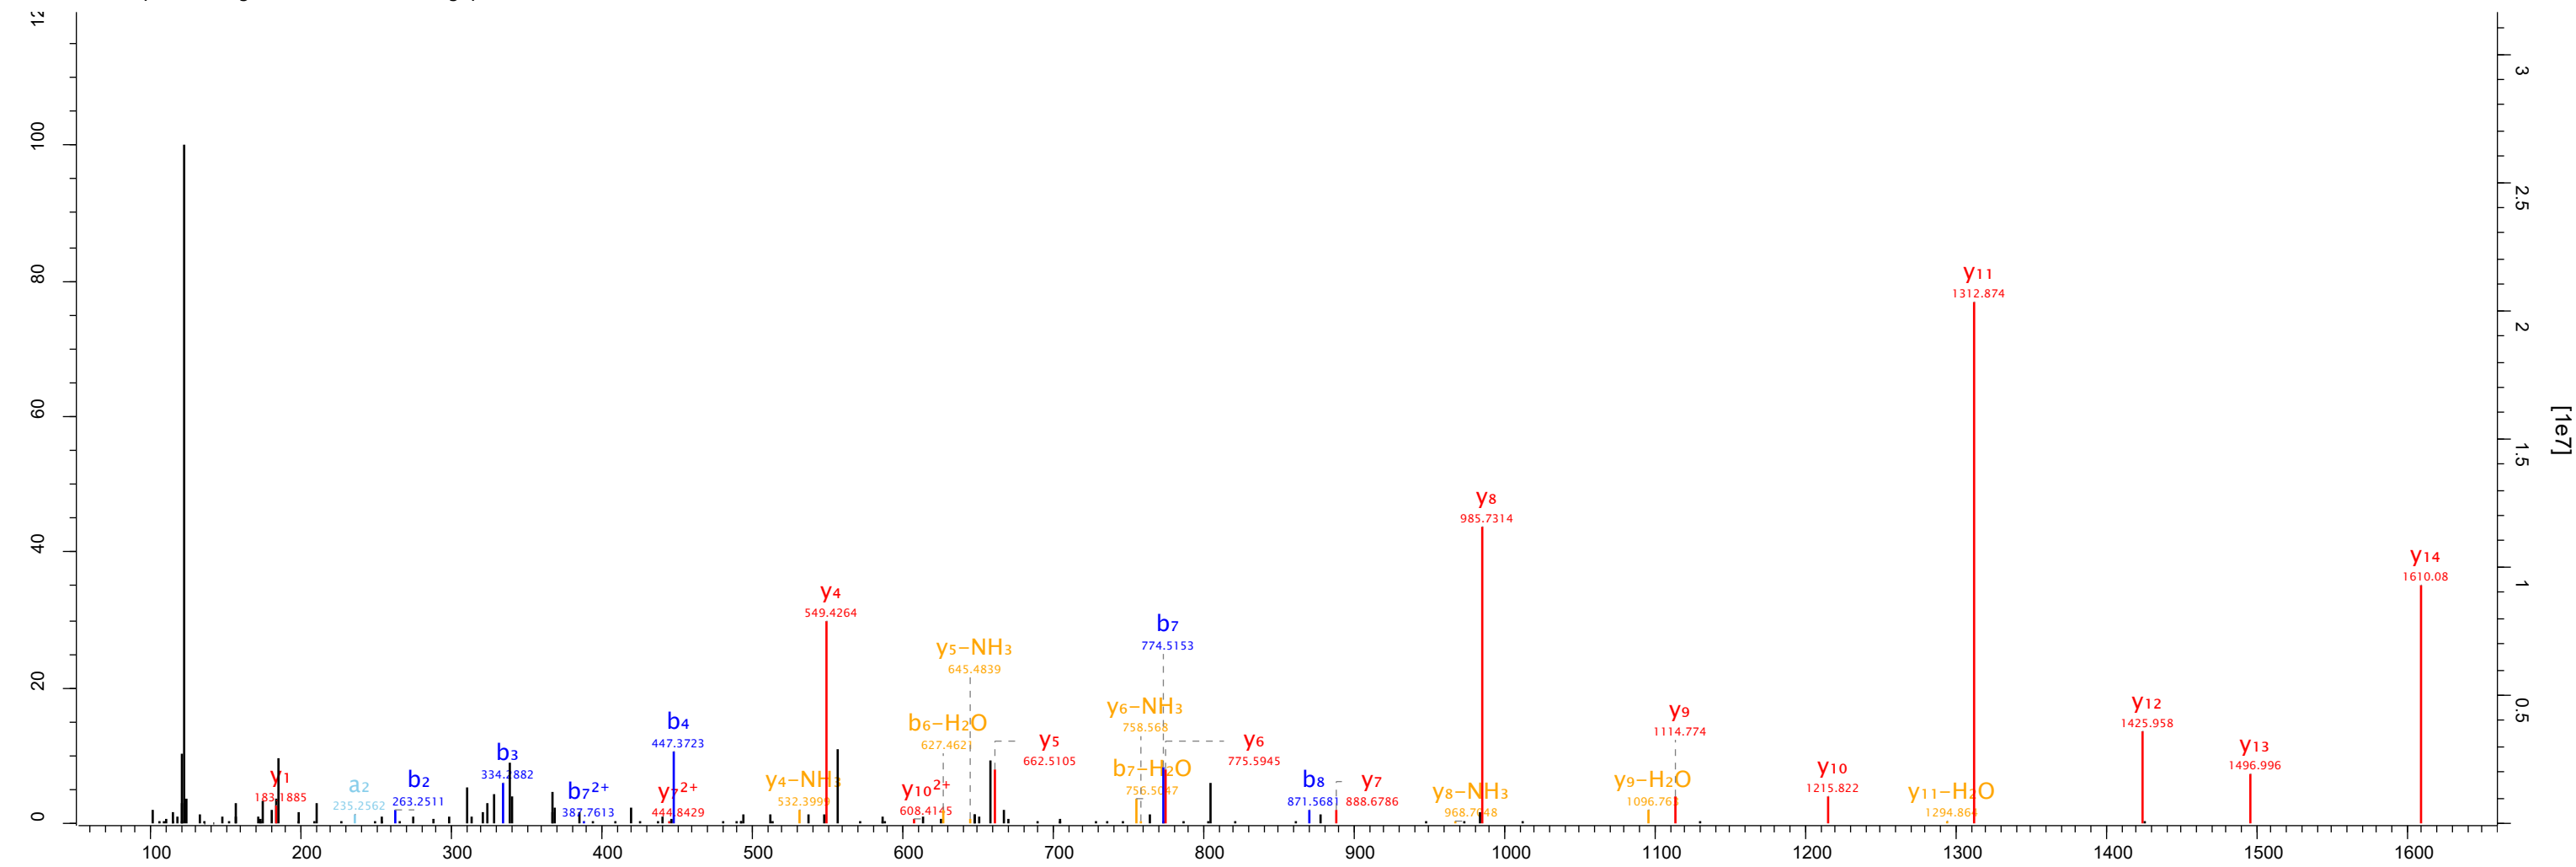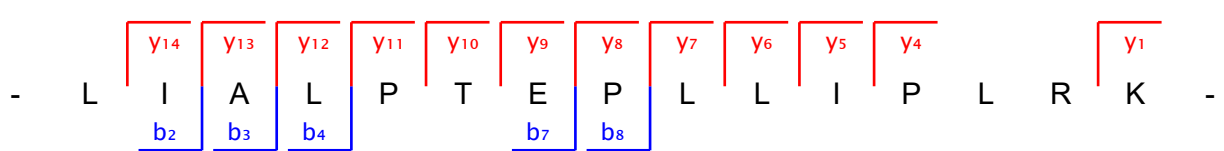

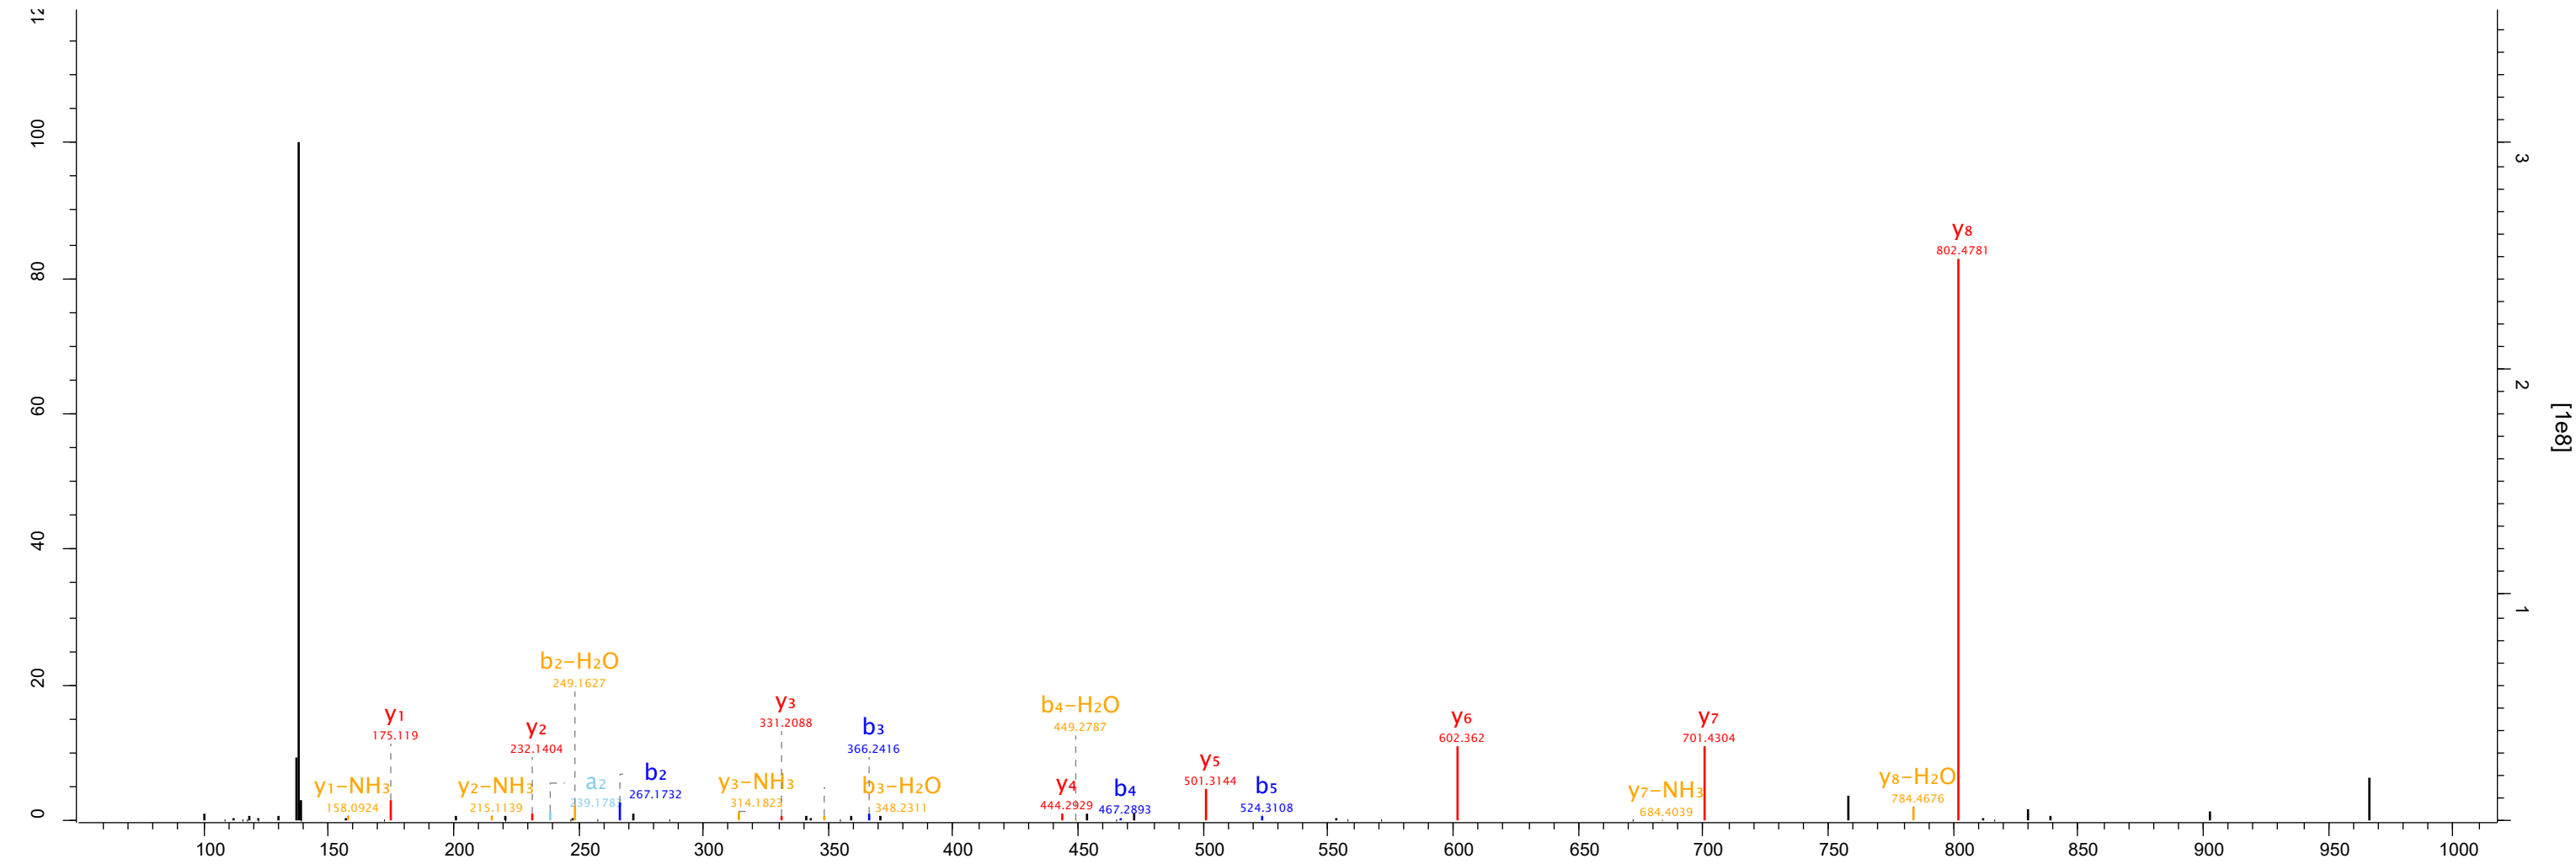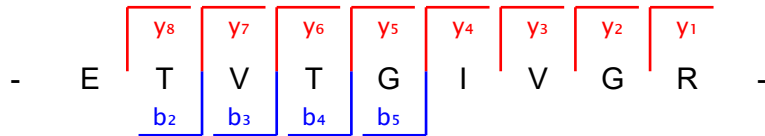

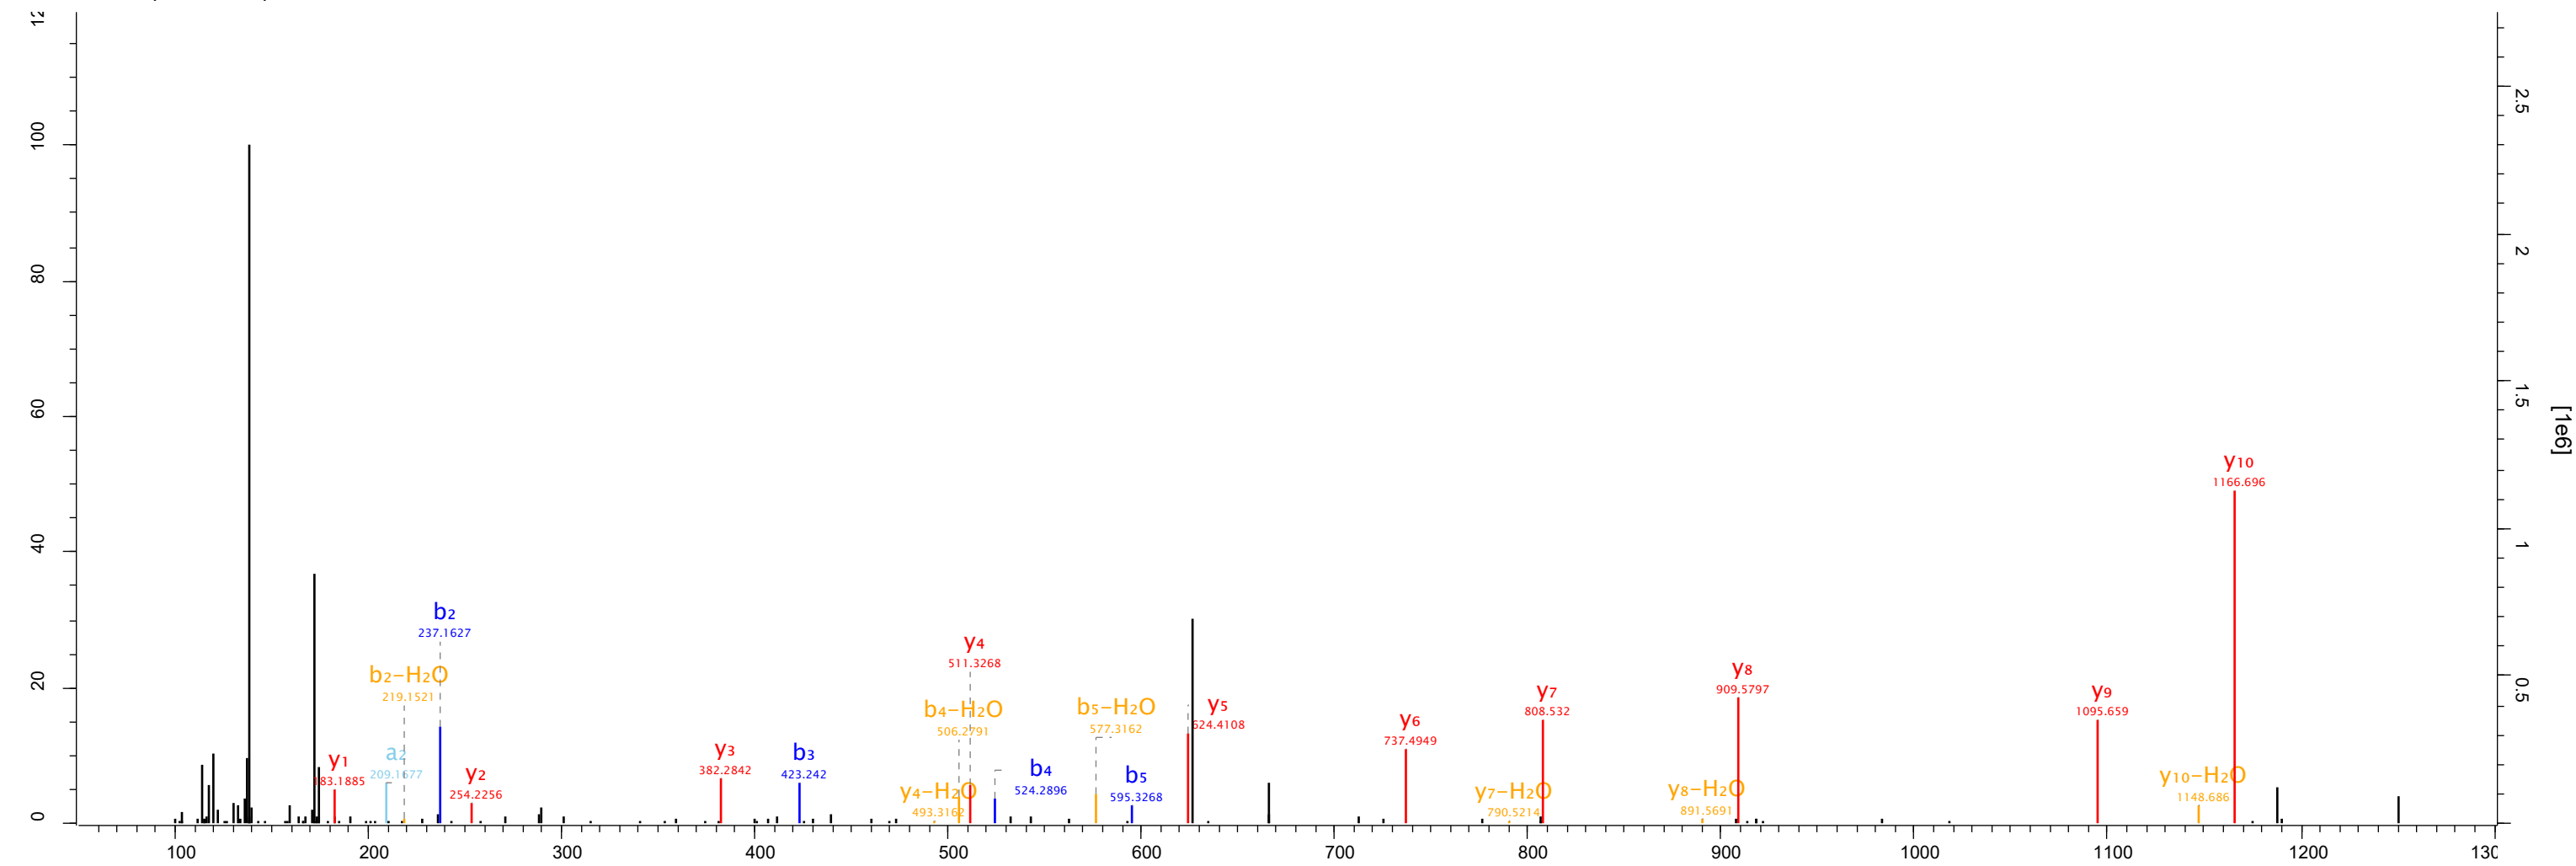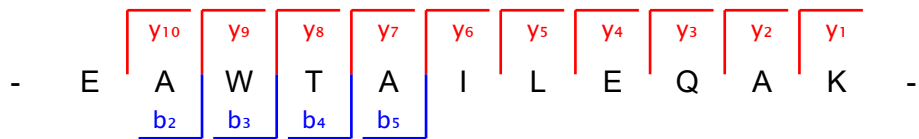

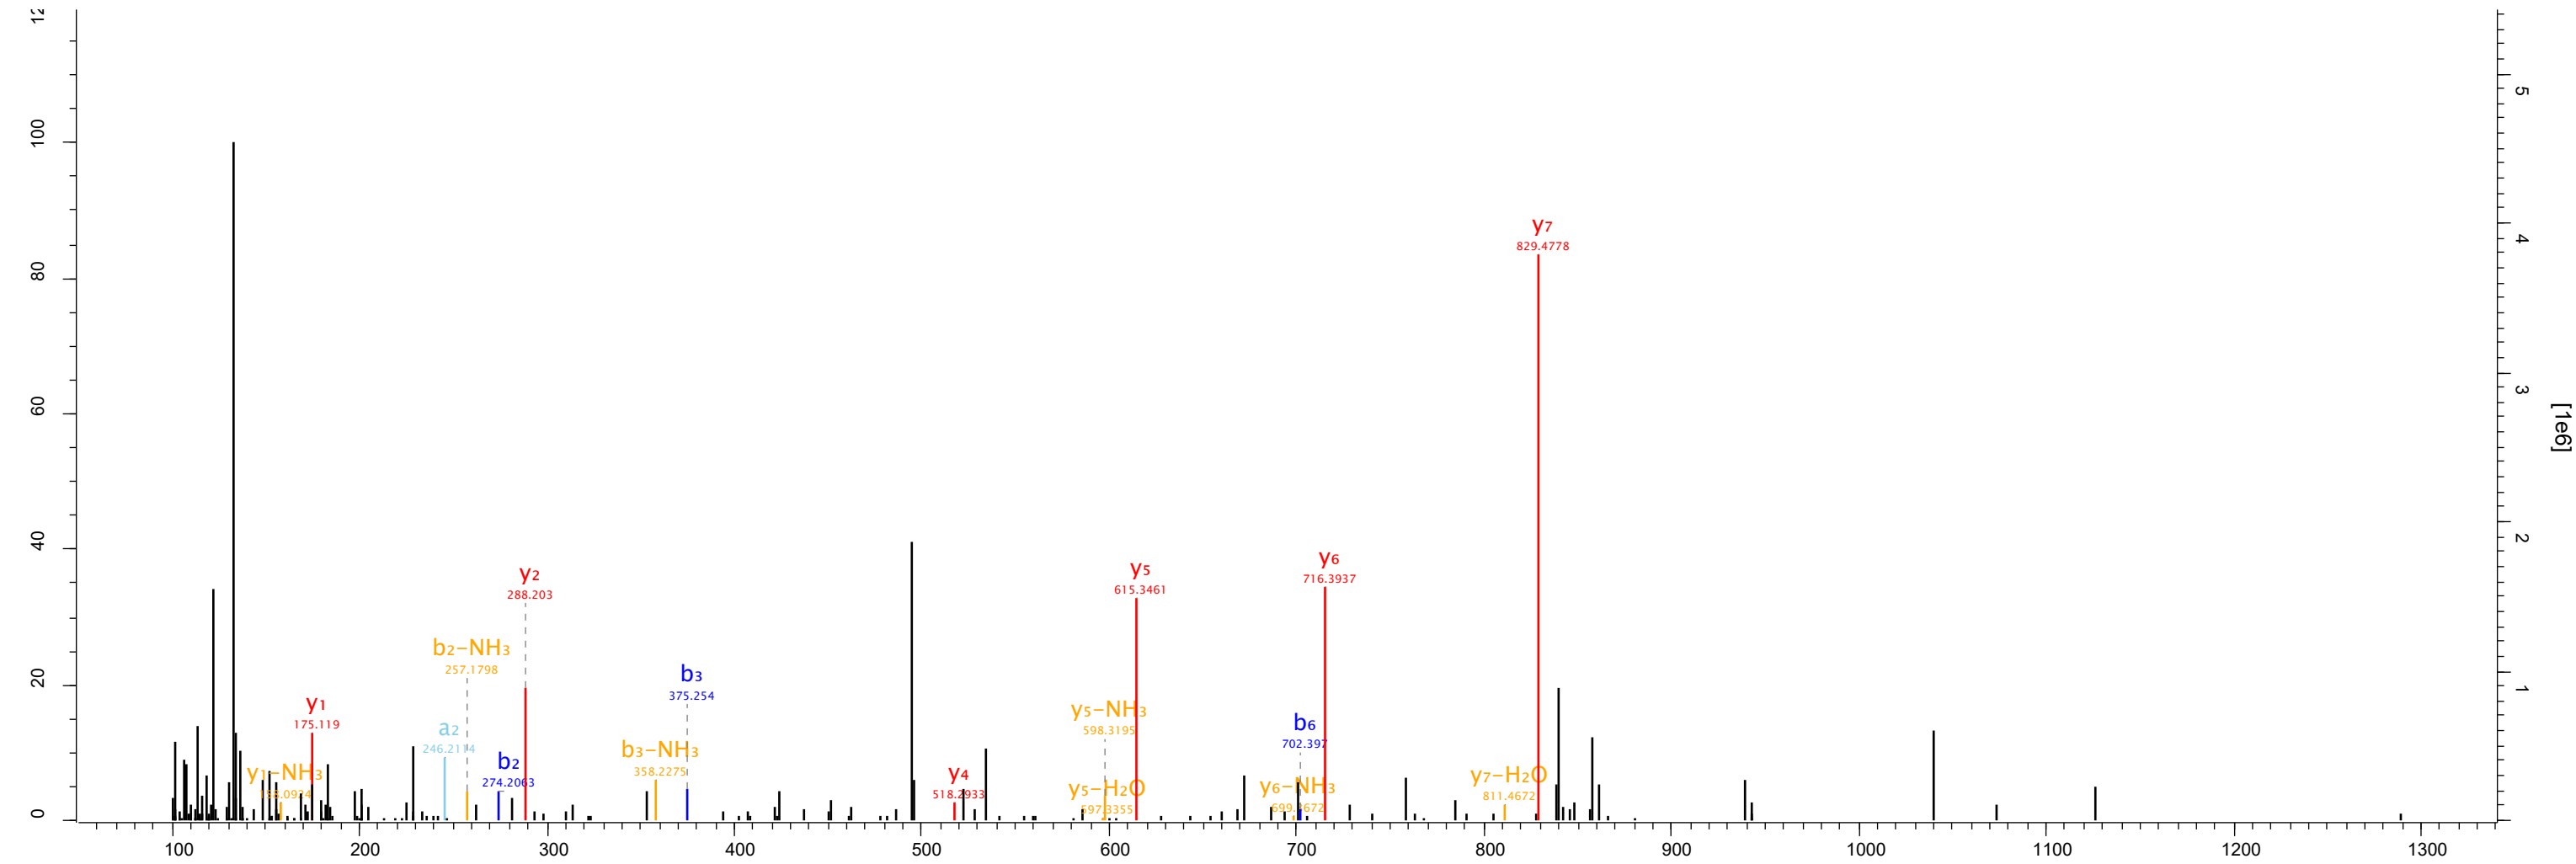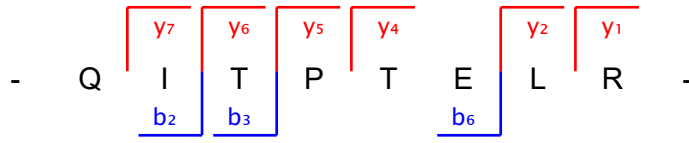



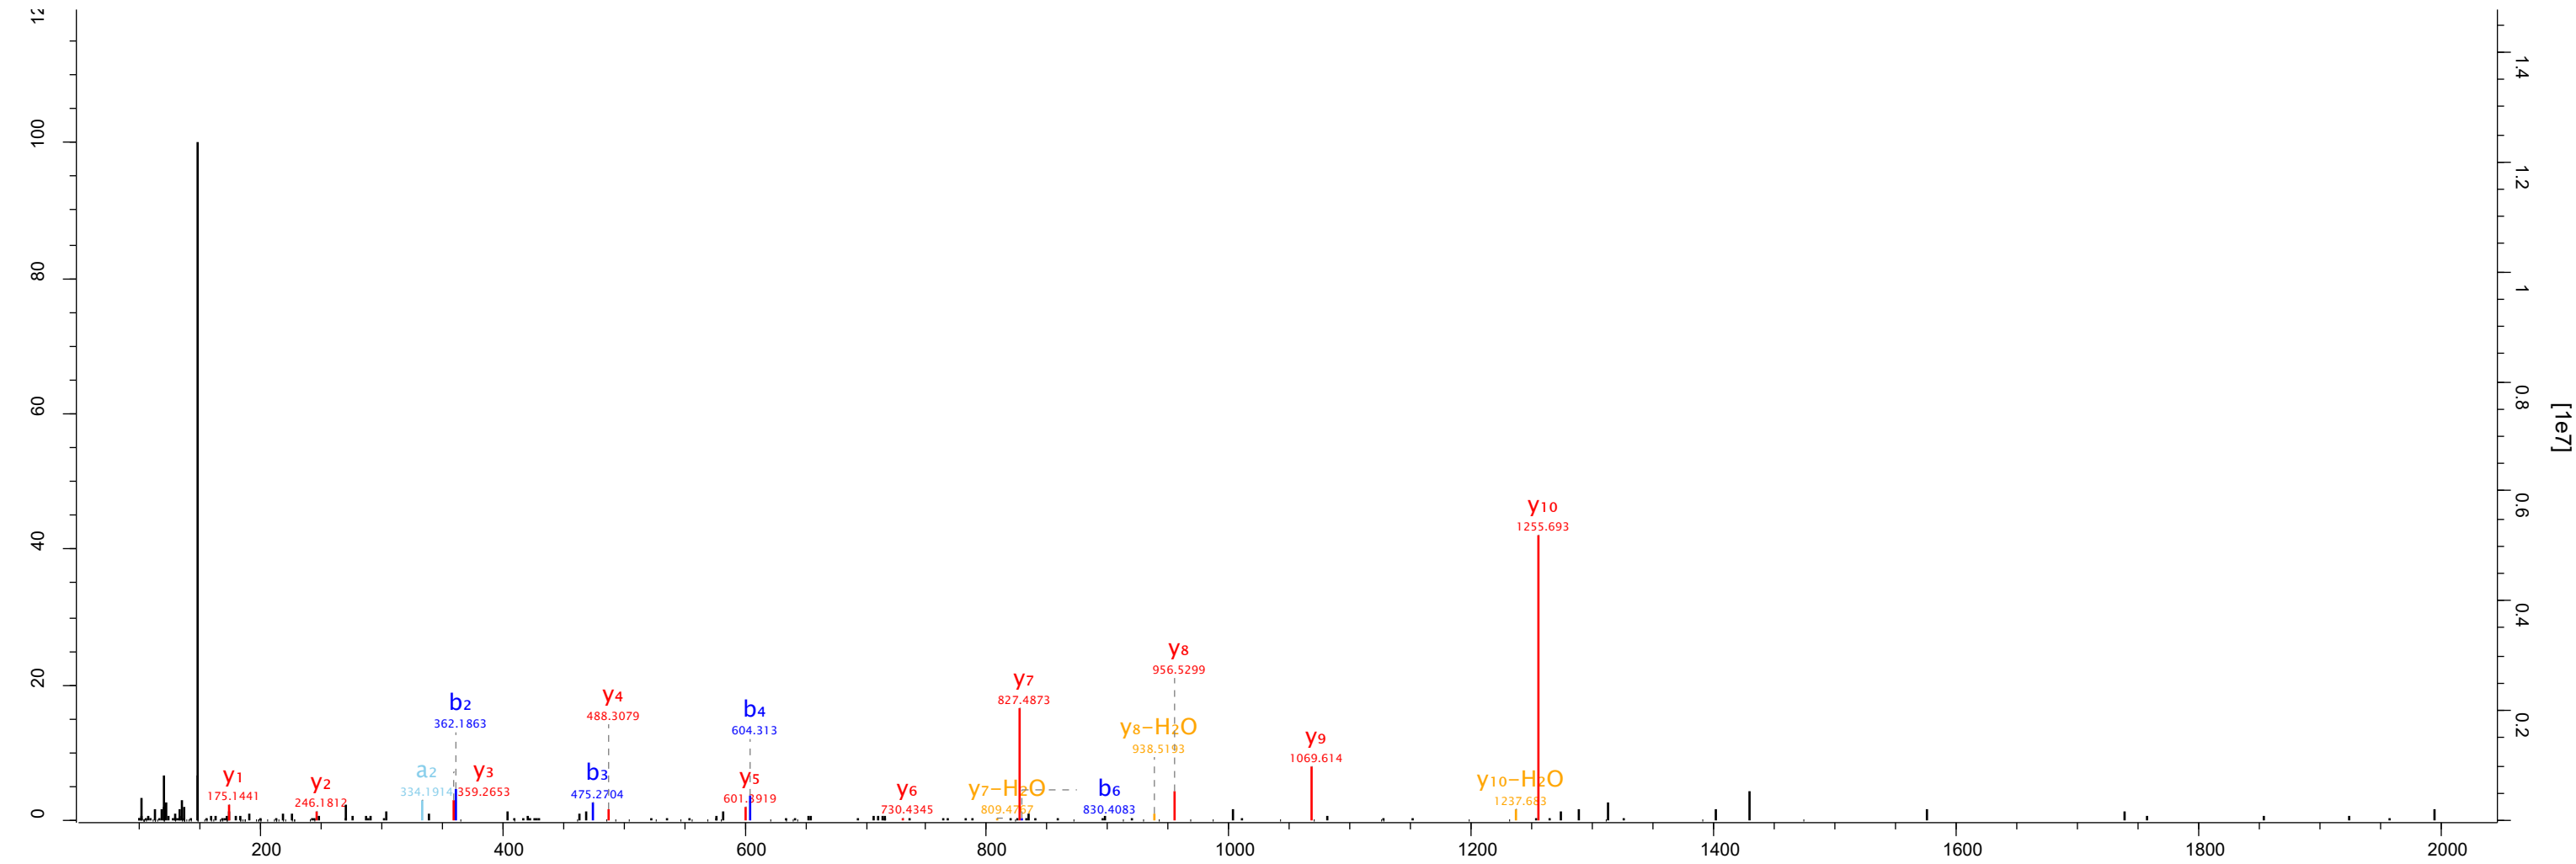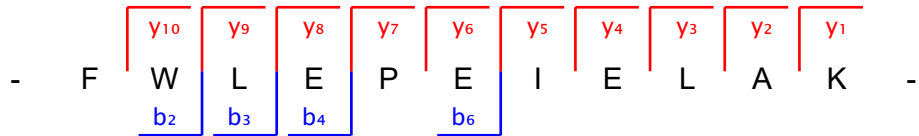

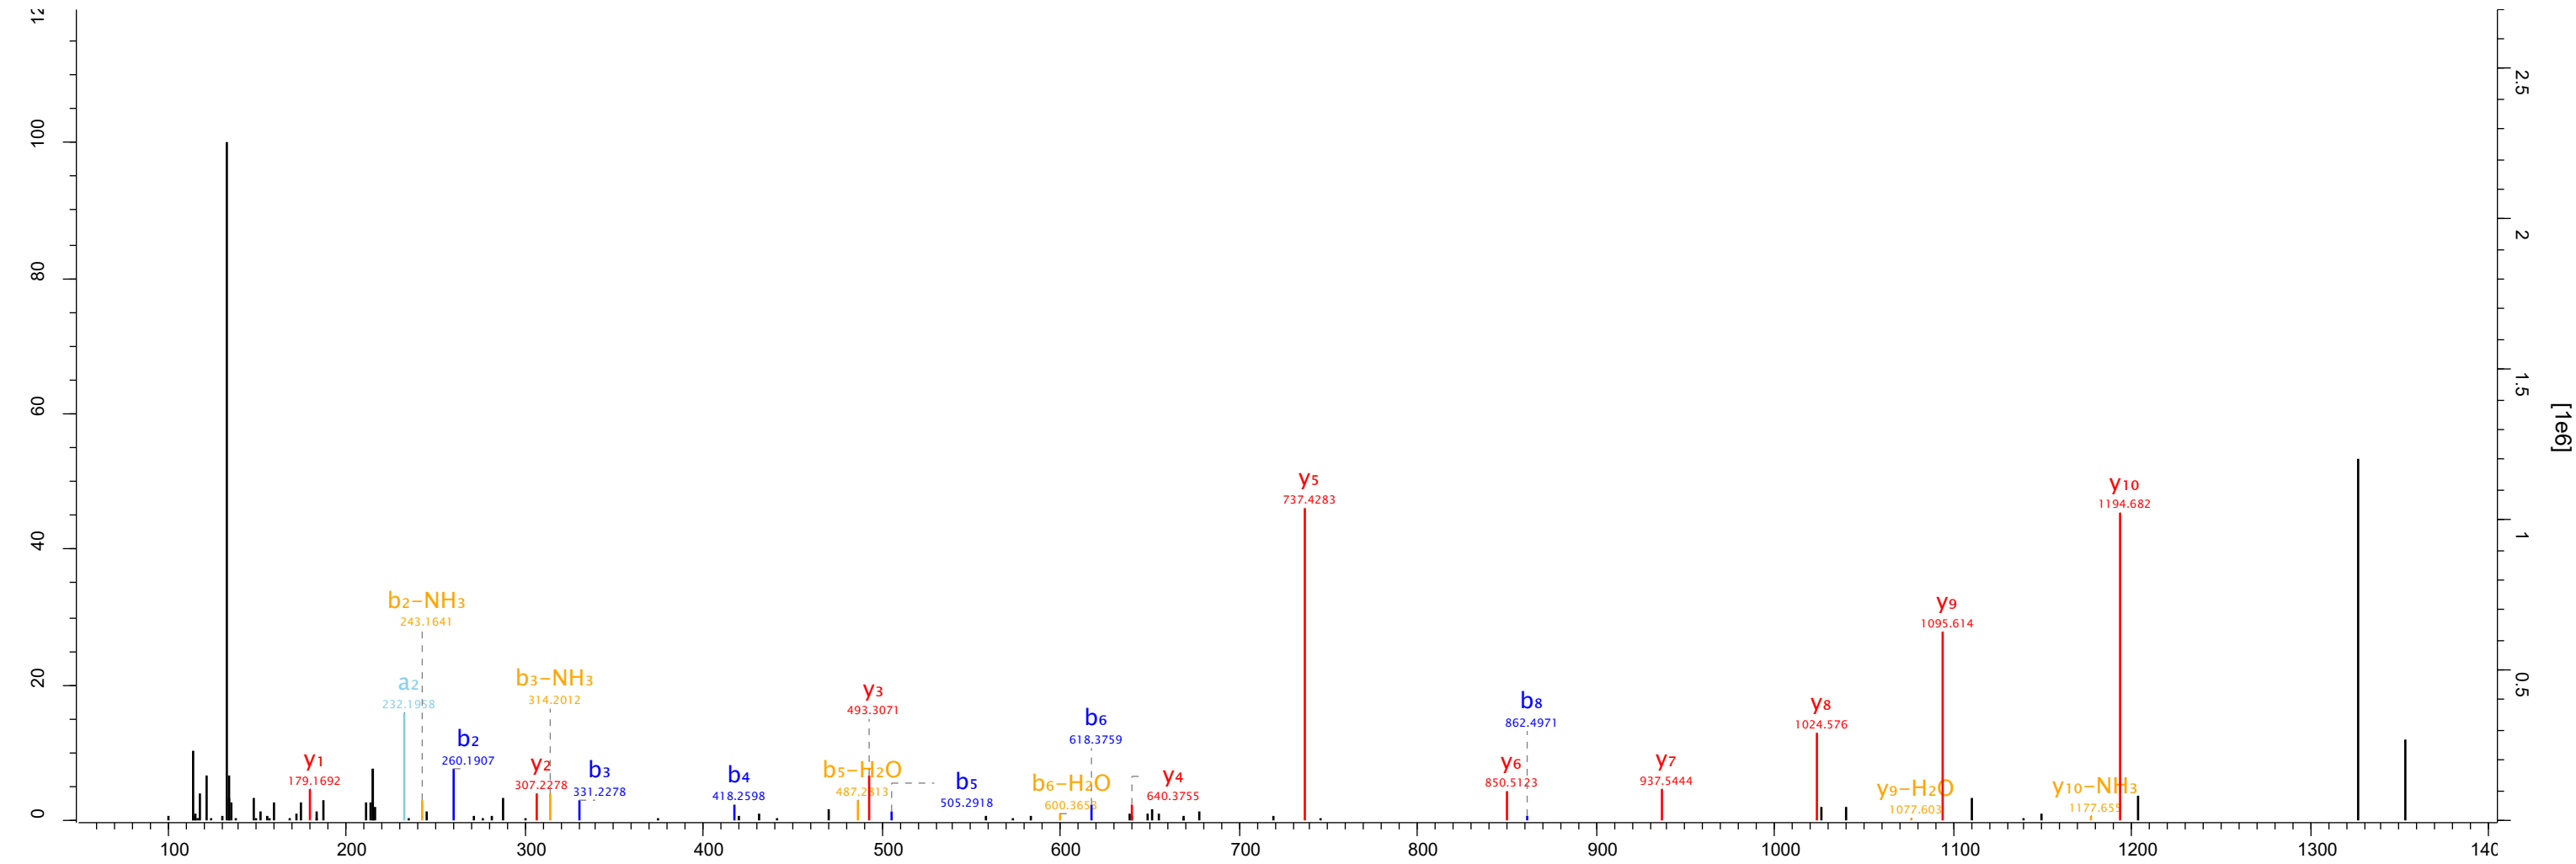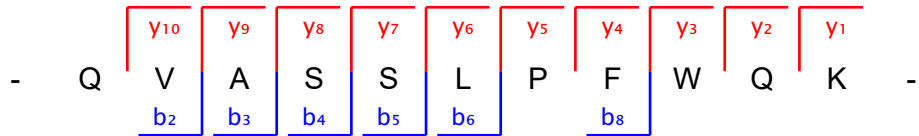

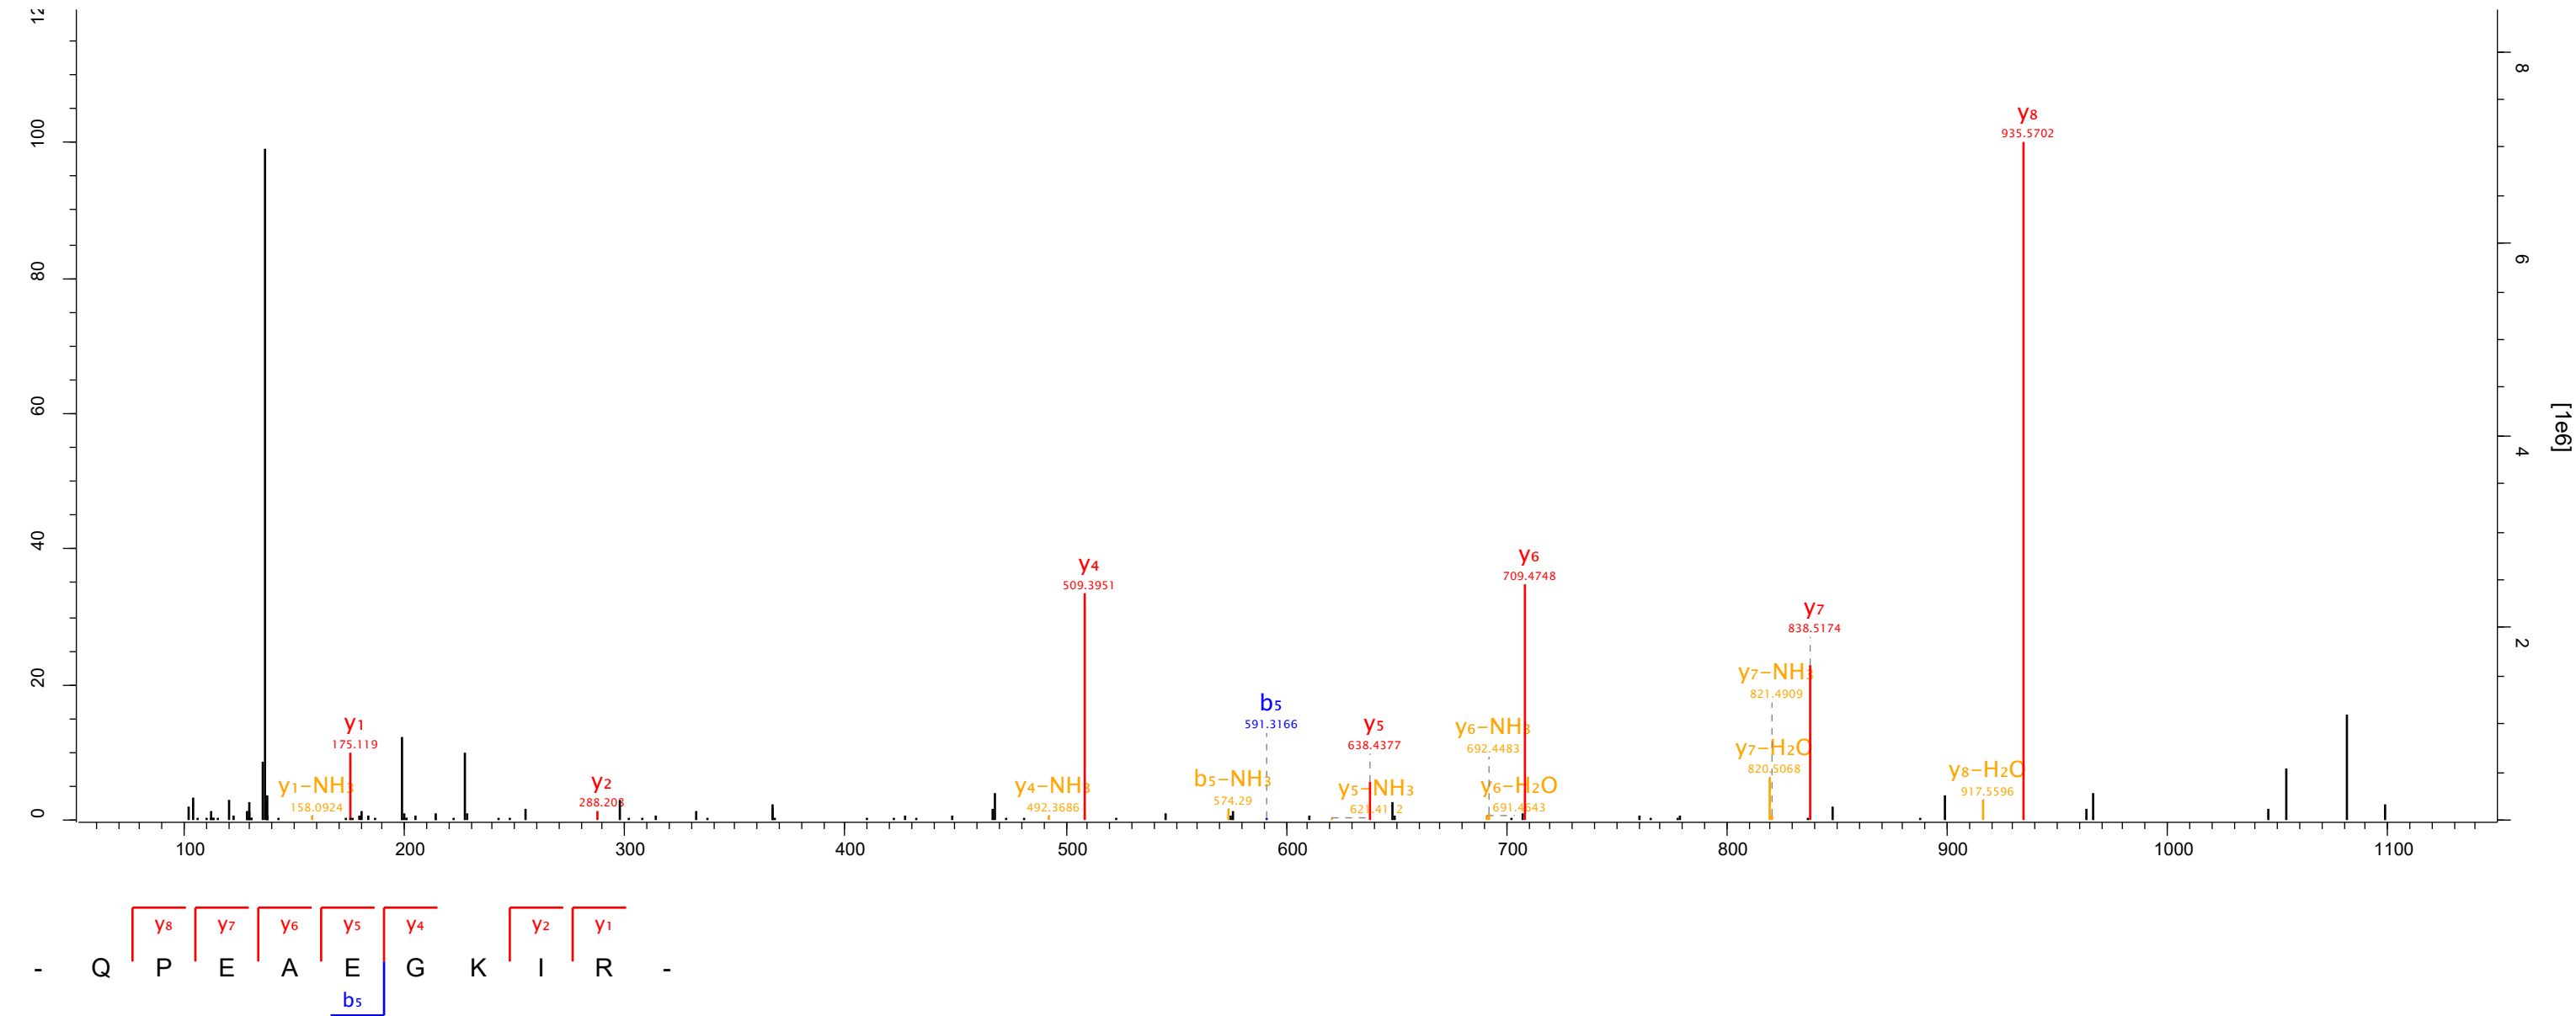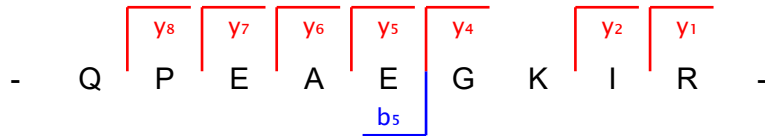

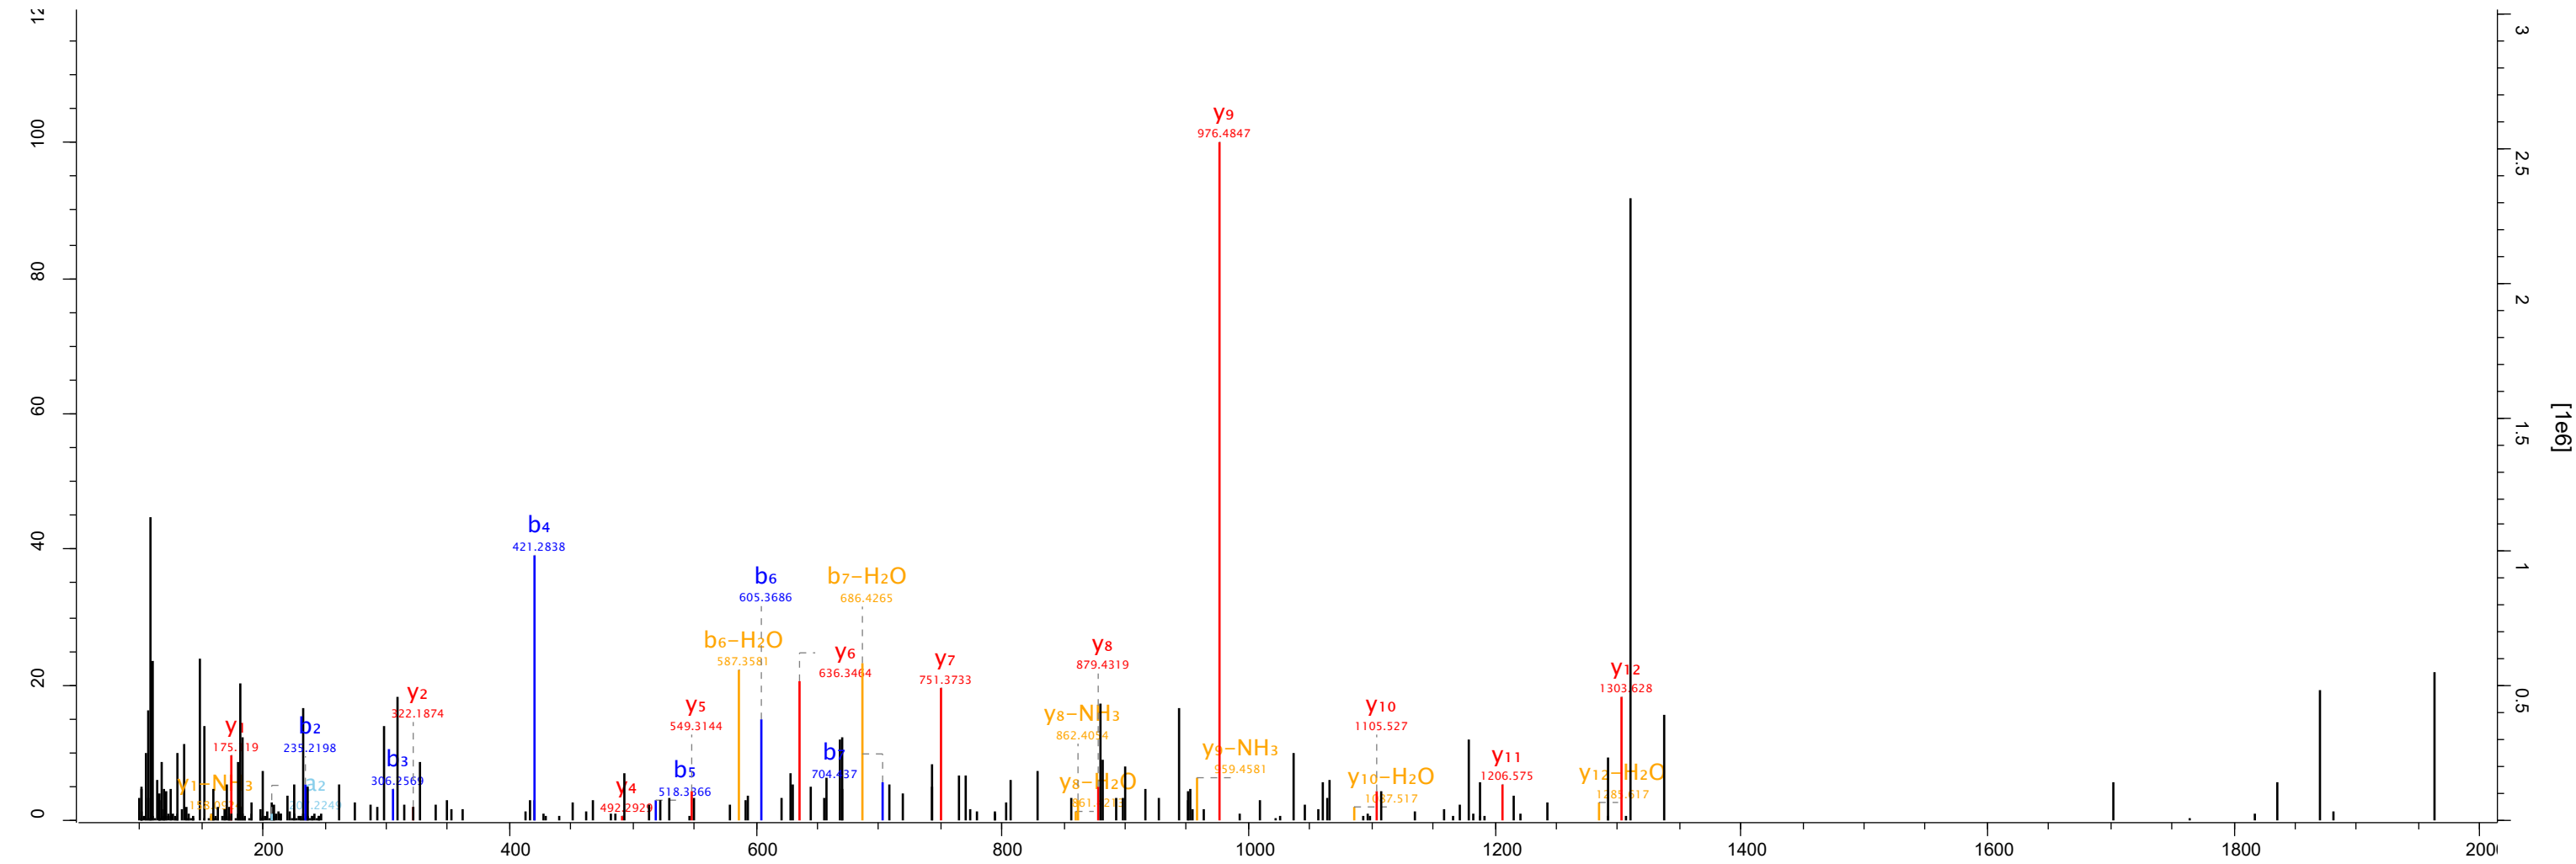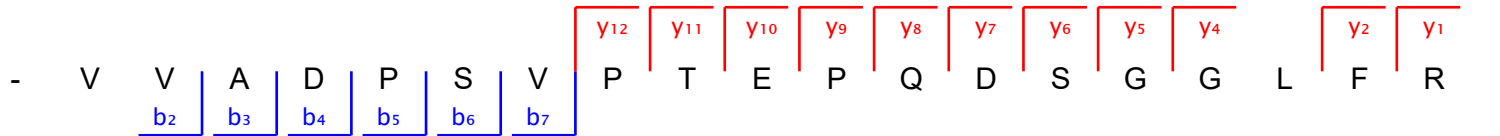

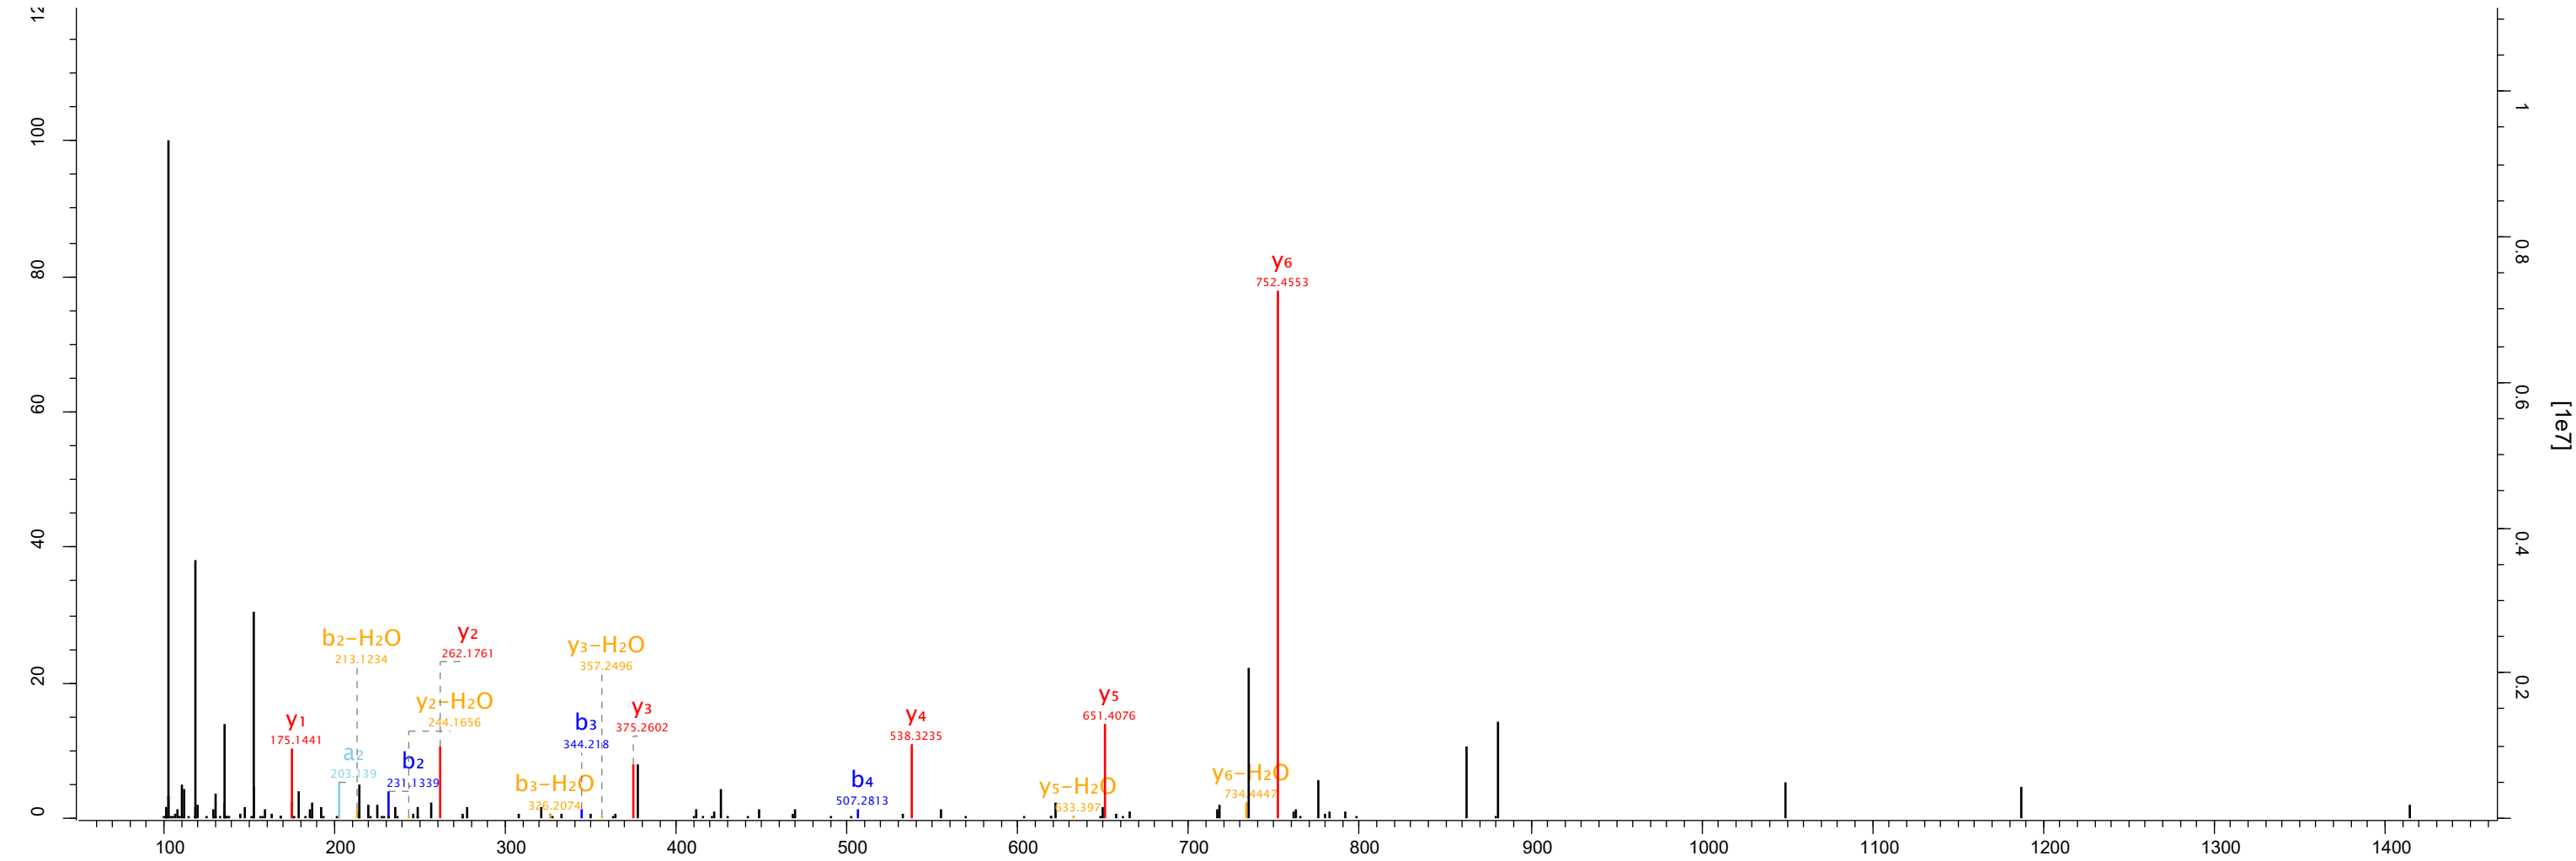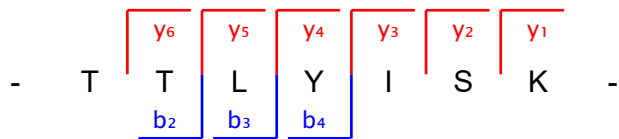

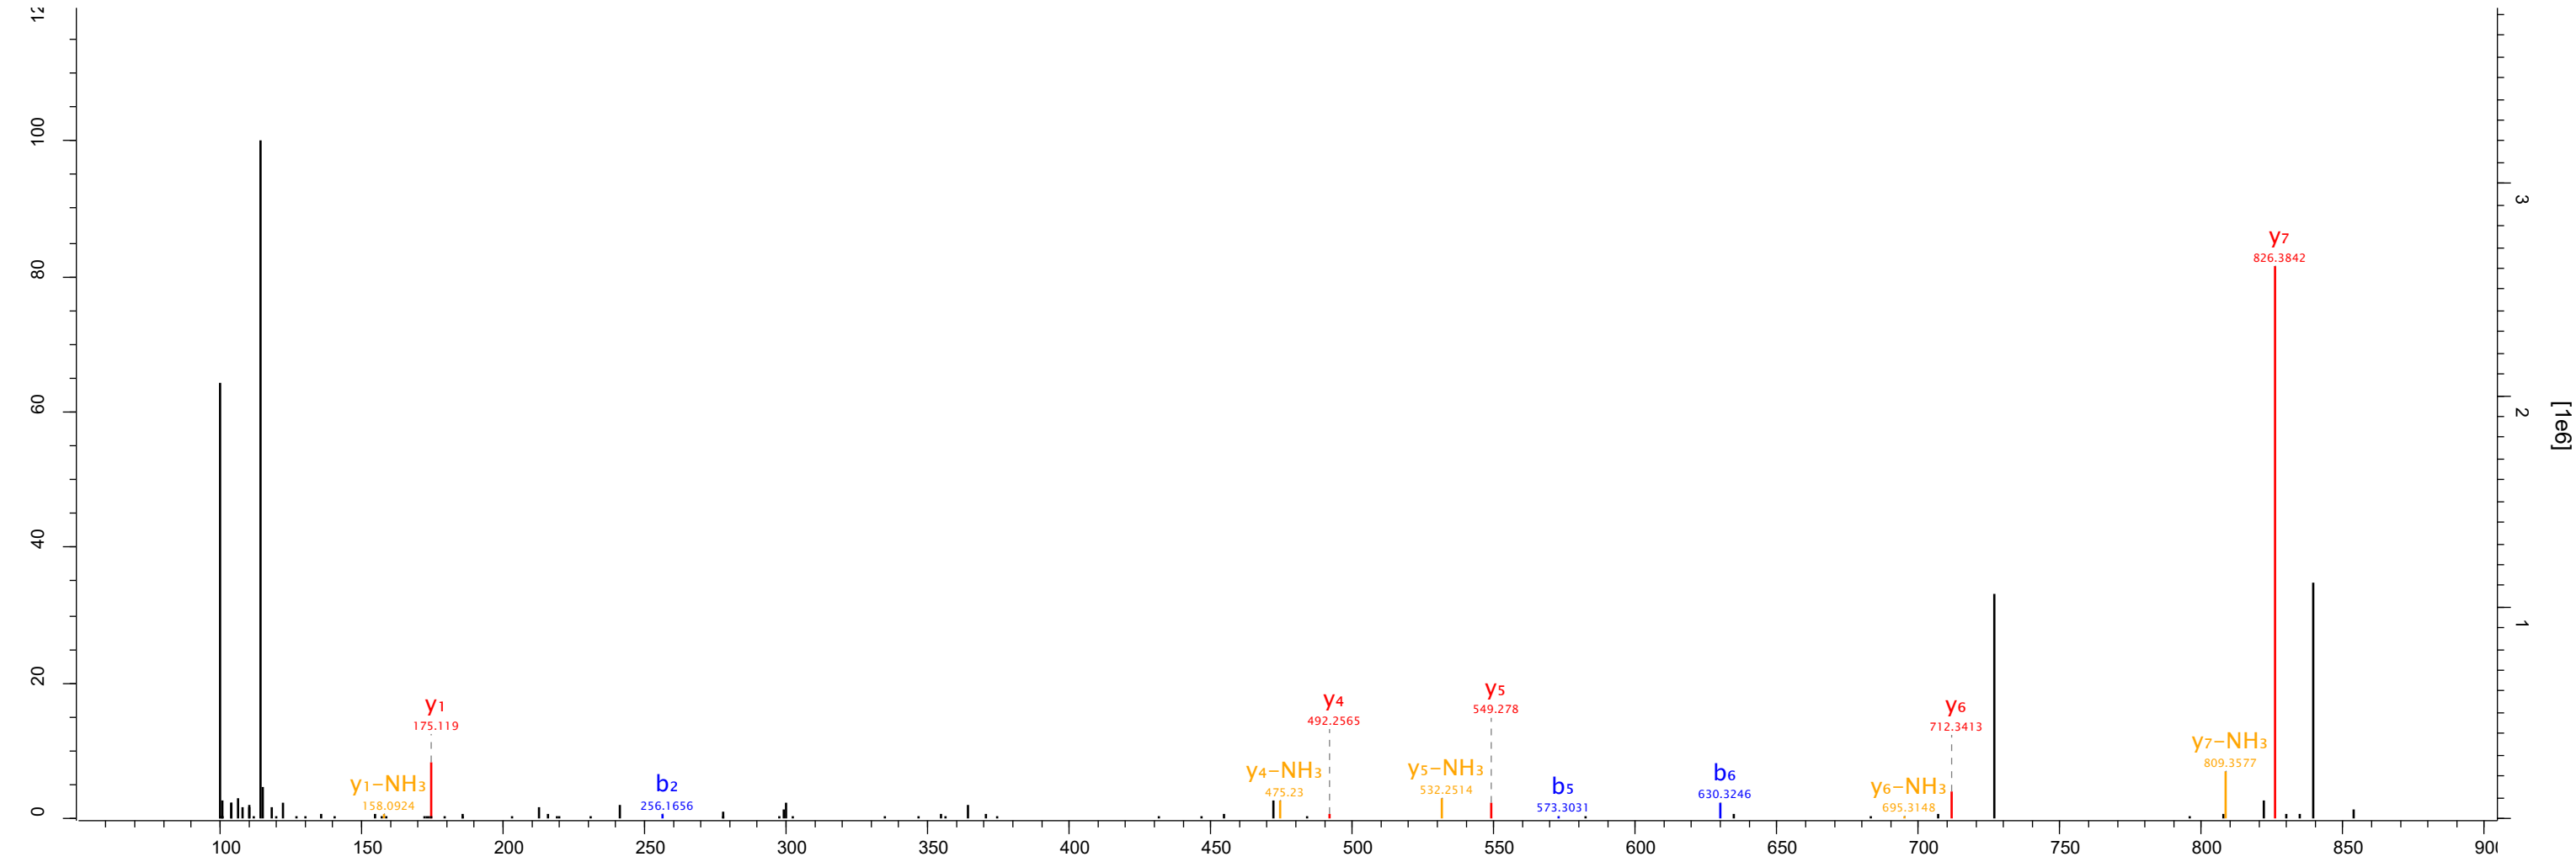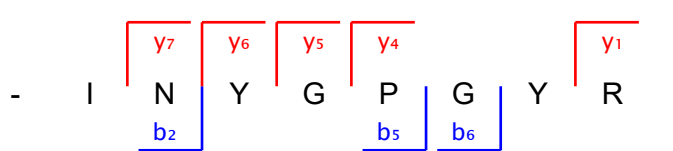

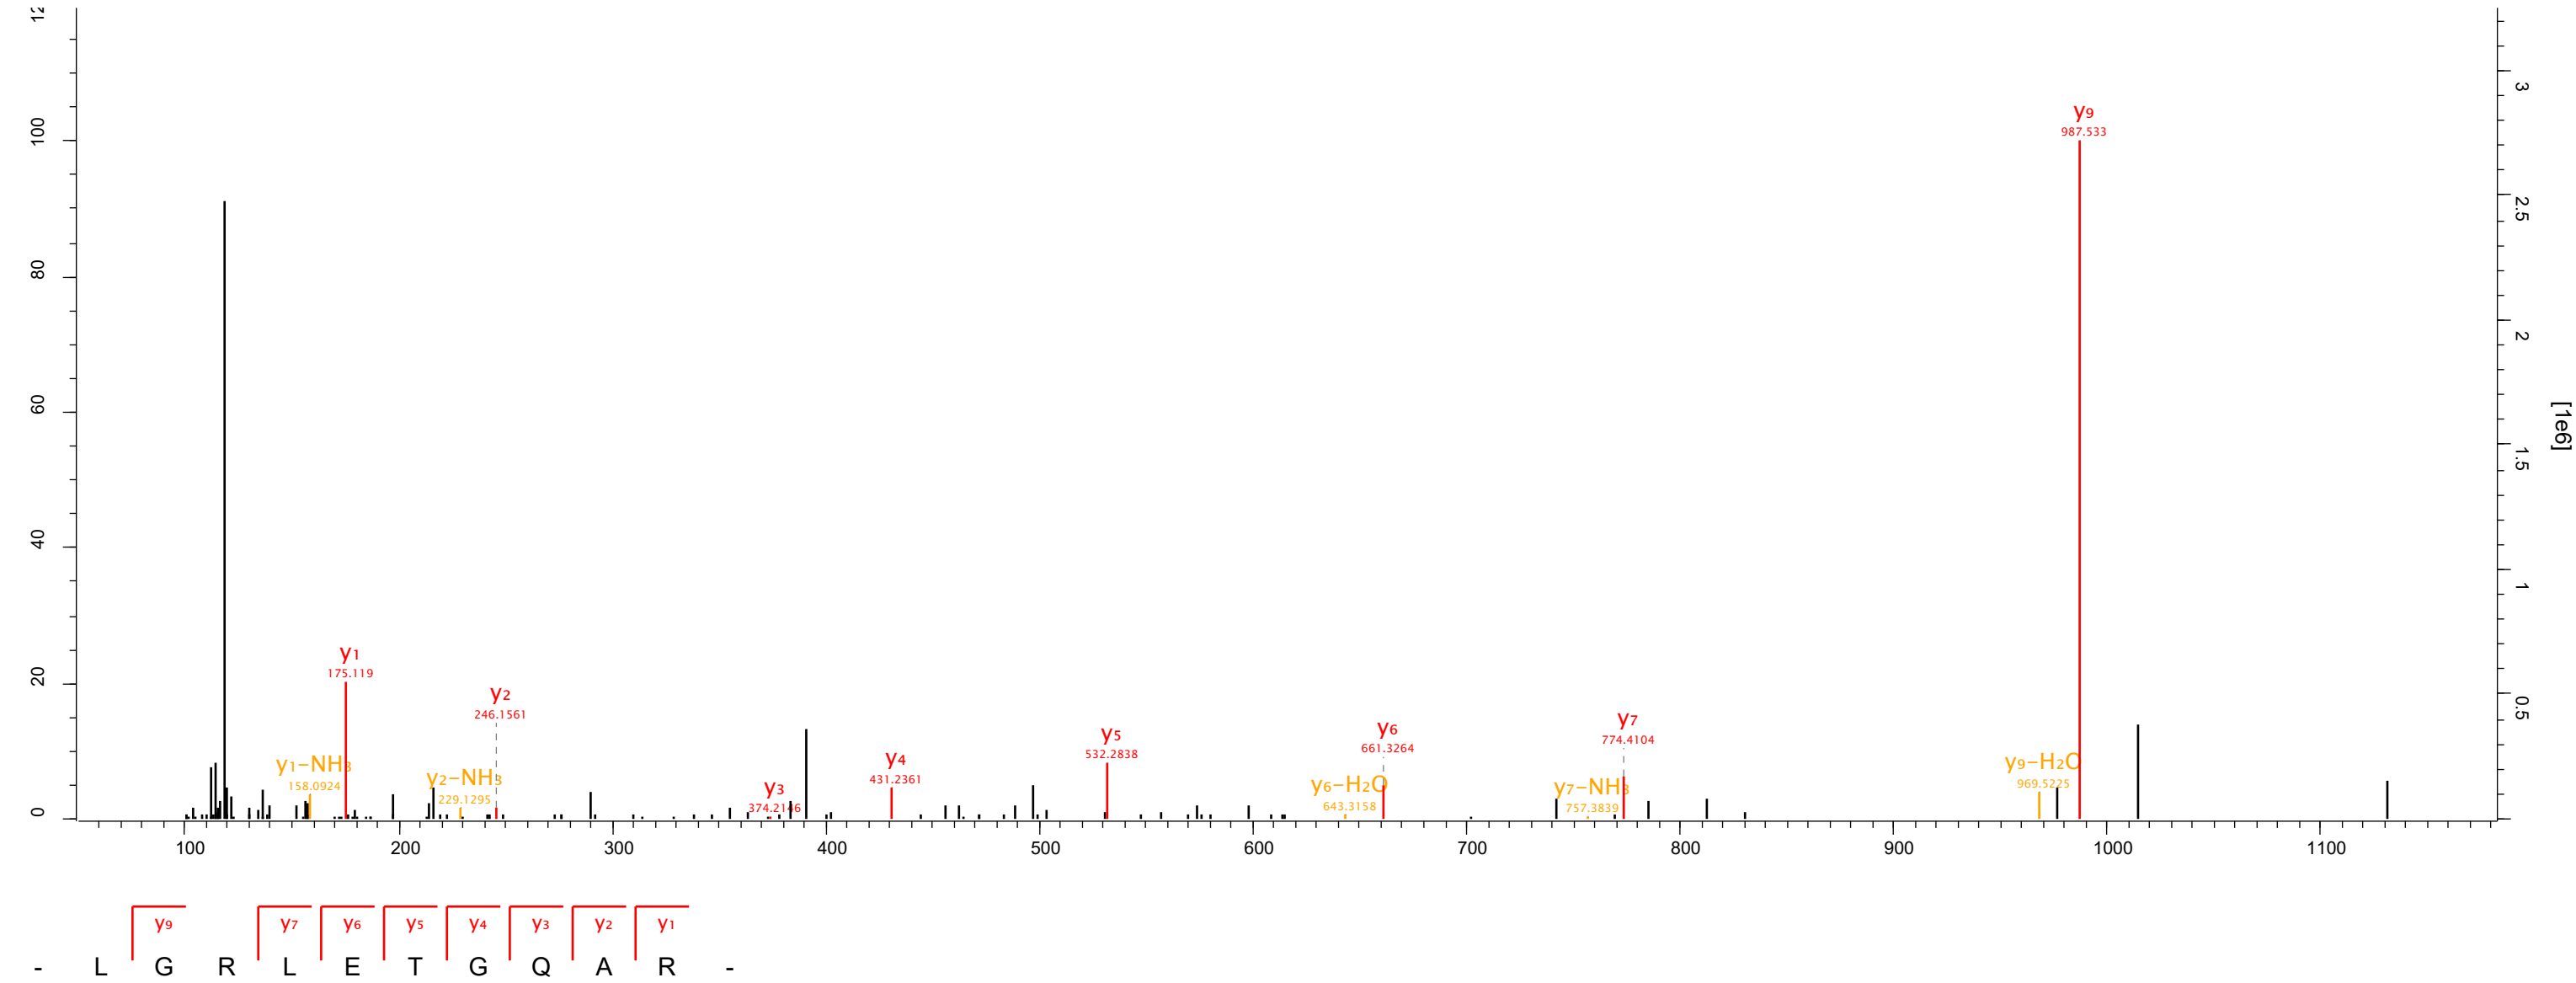

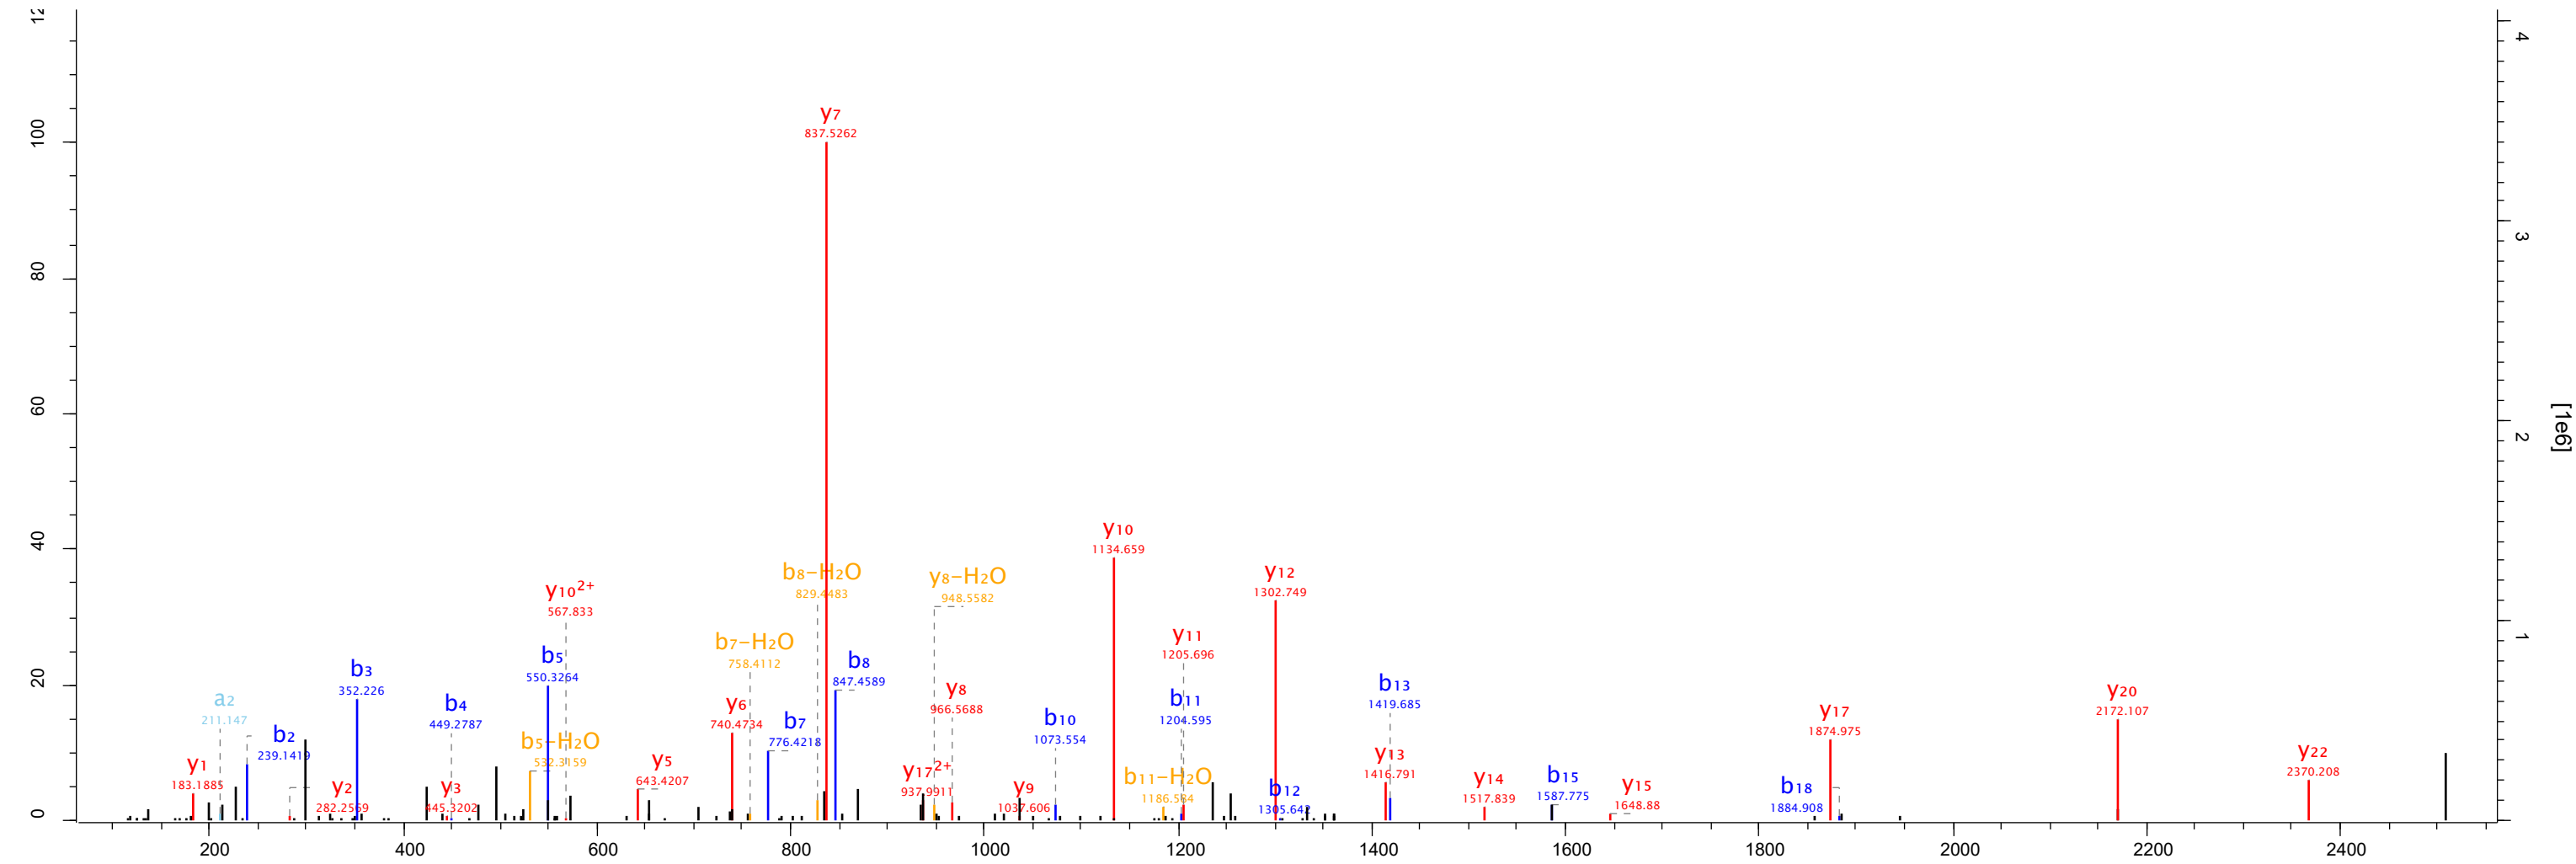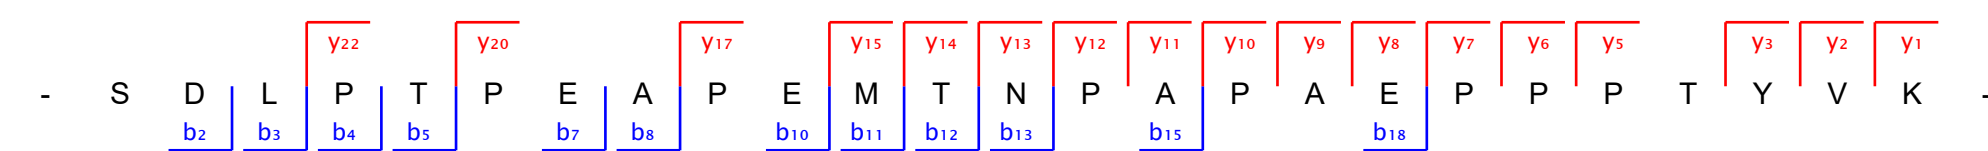



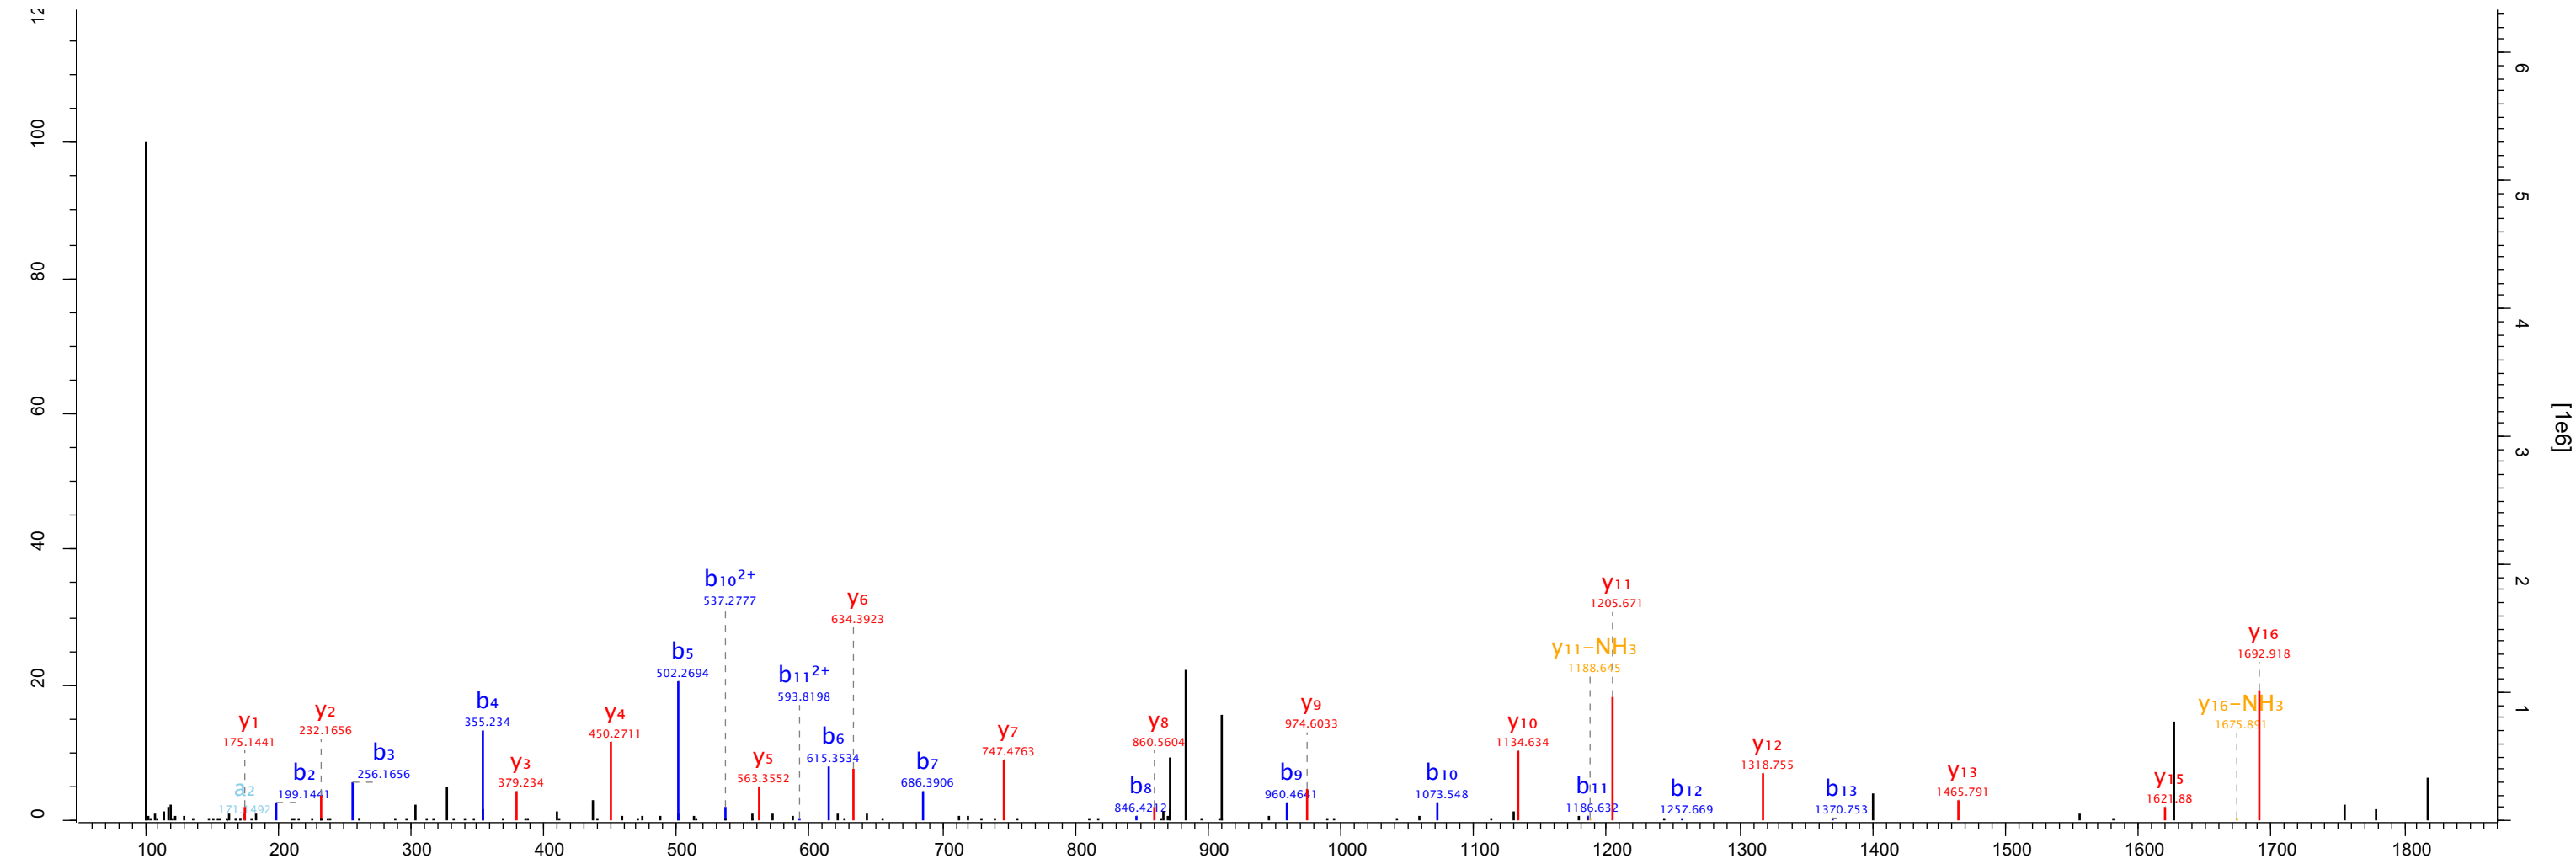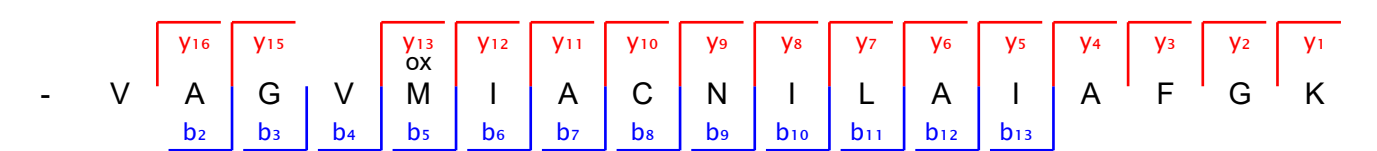

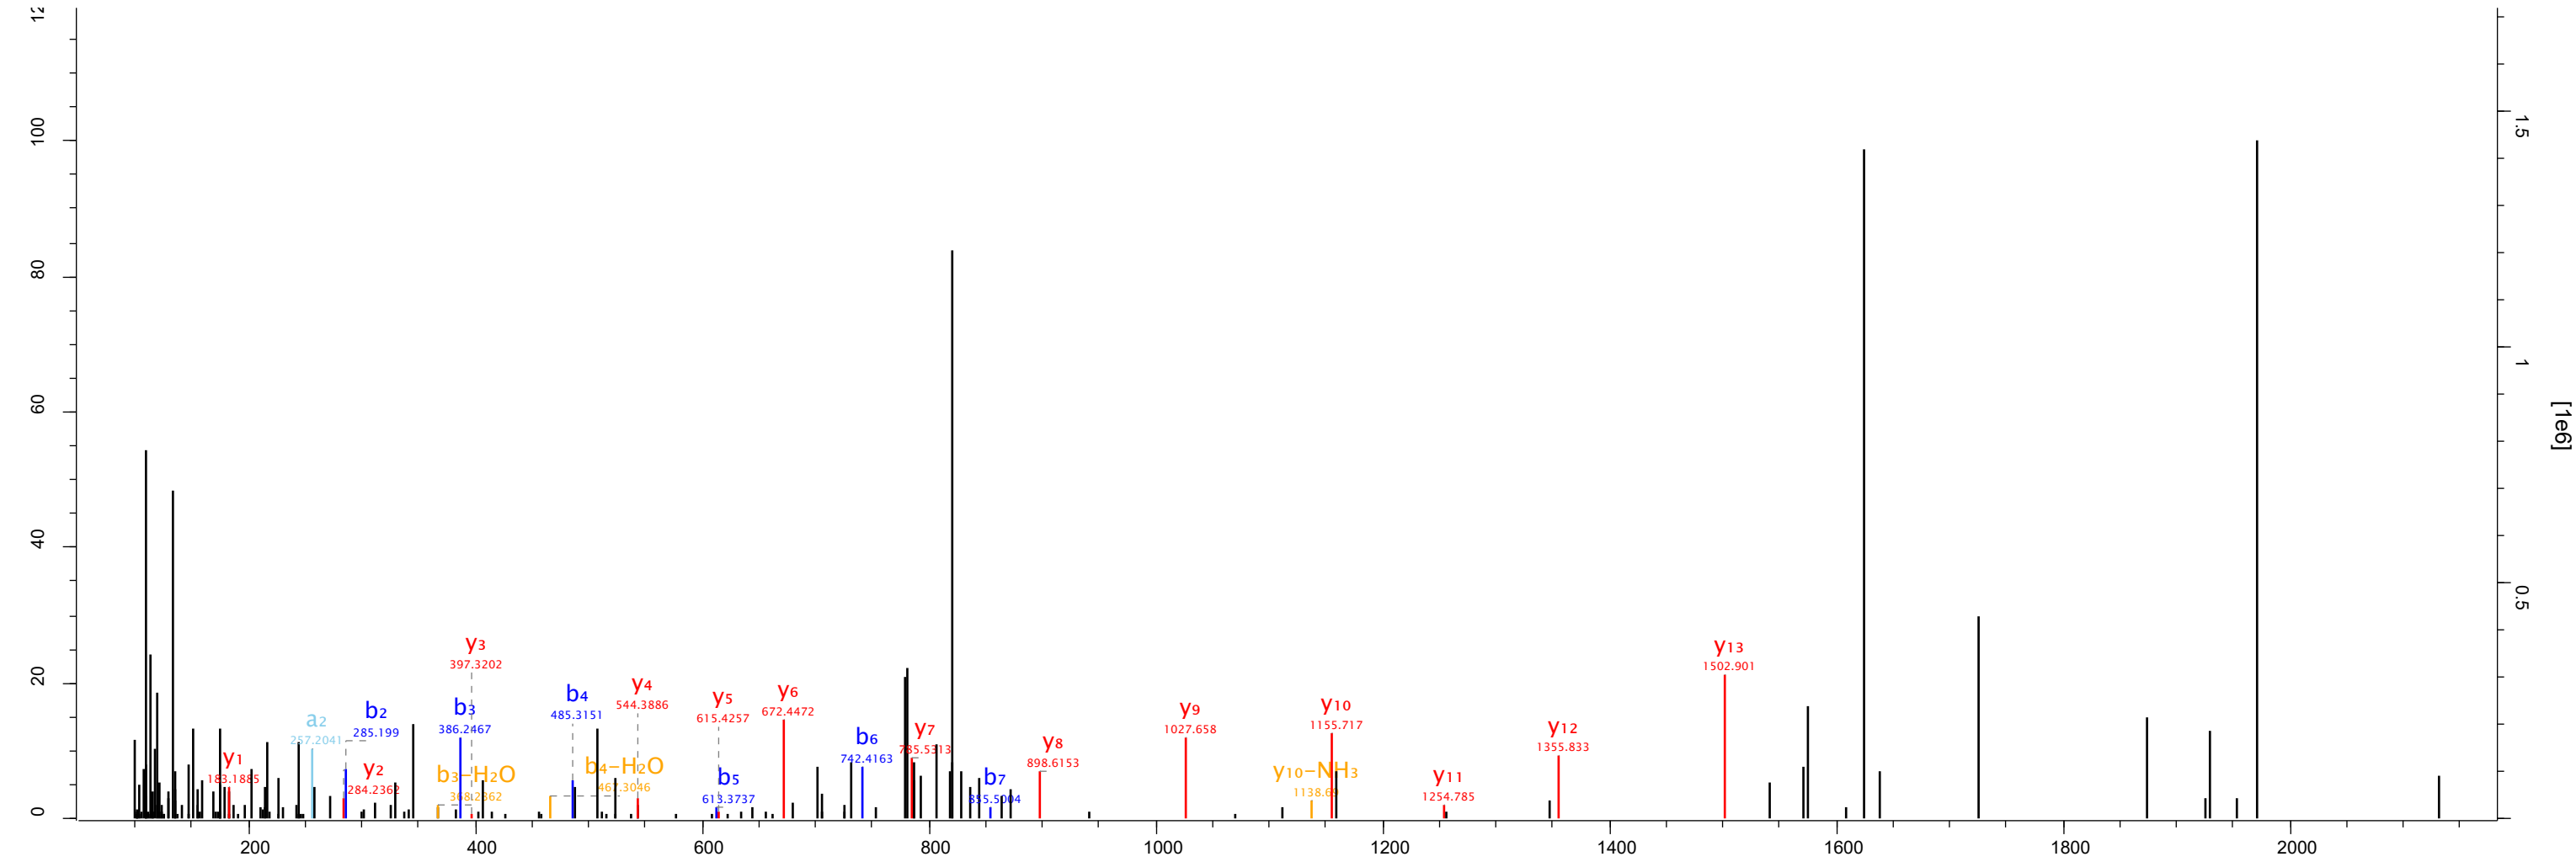

- T F T V Q E L L G A F L T K -  
b2 b3 b4 b5 b6 b7

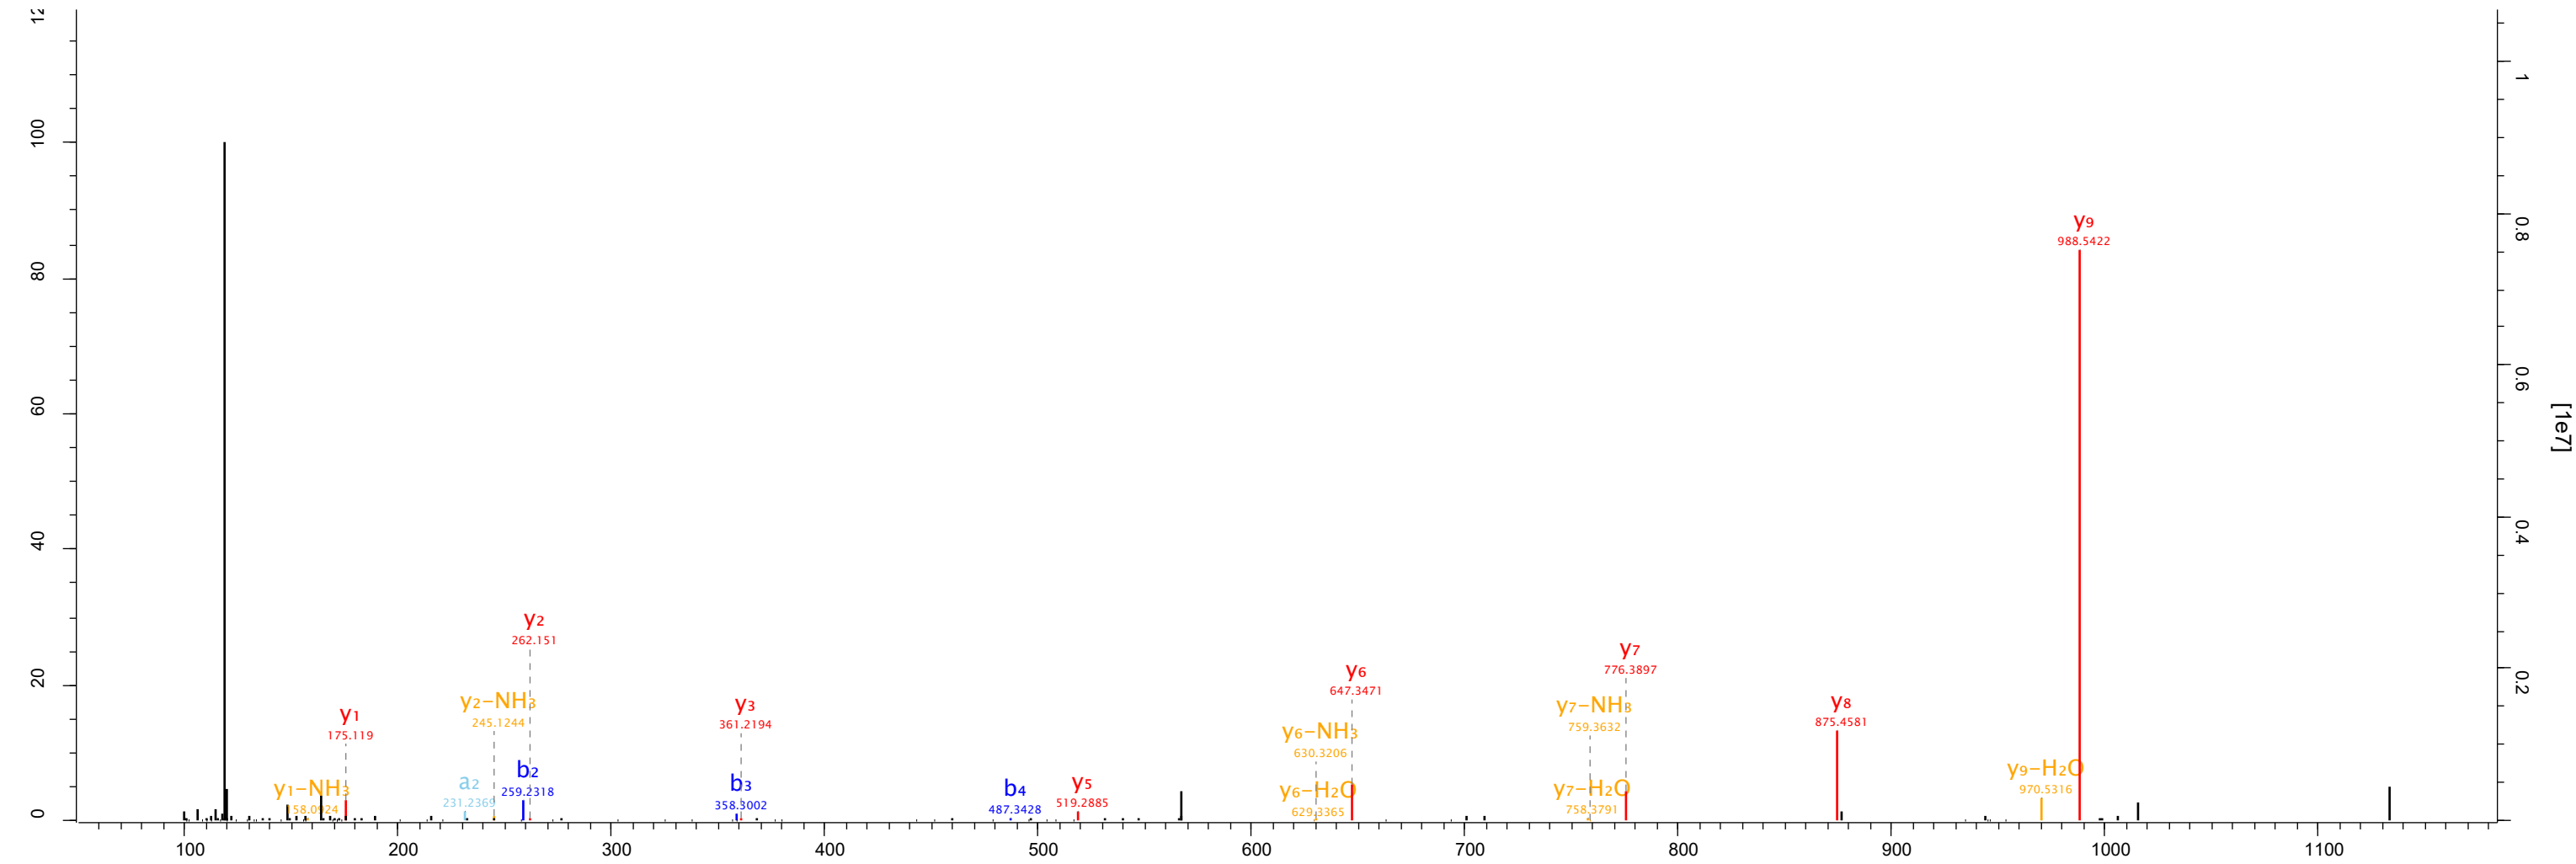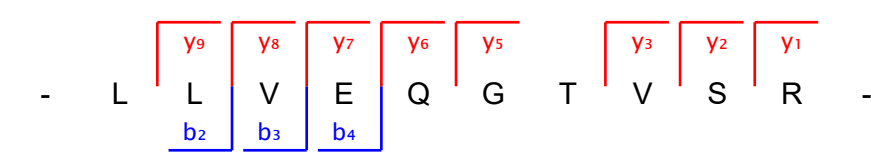

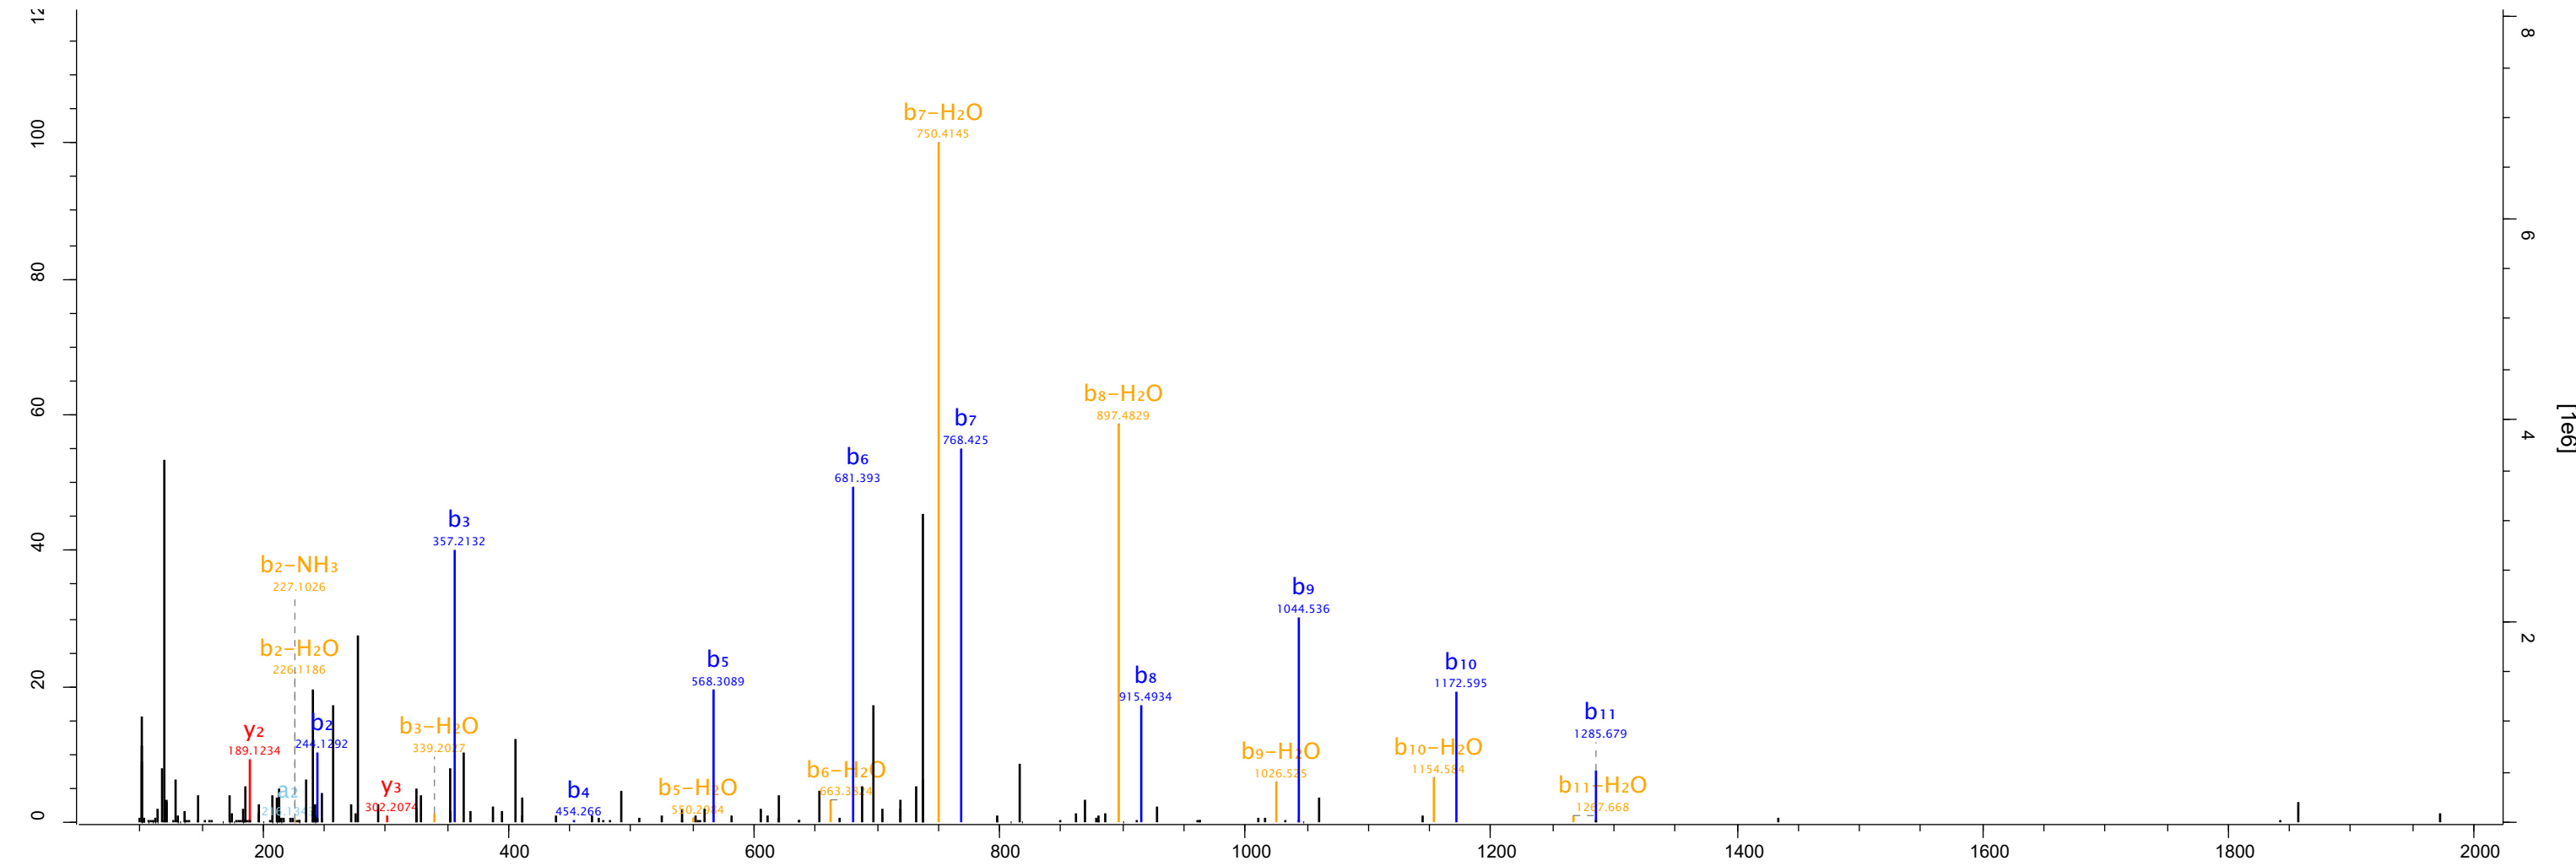

- T N I P N I S F E Q I V A -

b<sub>2</sub>
b<sub>3</sub>
b<sub>4</sub>
b<sub>5</sub>
b<sub>6</sub>
b<sub>7</sub>
b<sub>8</sub>
b<sub>9</sub>
b<sub>10</sub>
b<sub>11</sub>
y<sub>3</sub>
y<sub>2</sub>

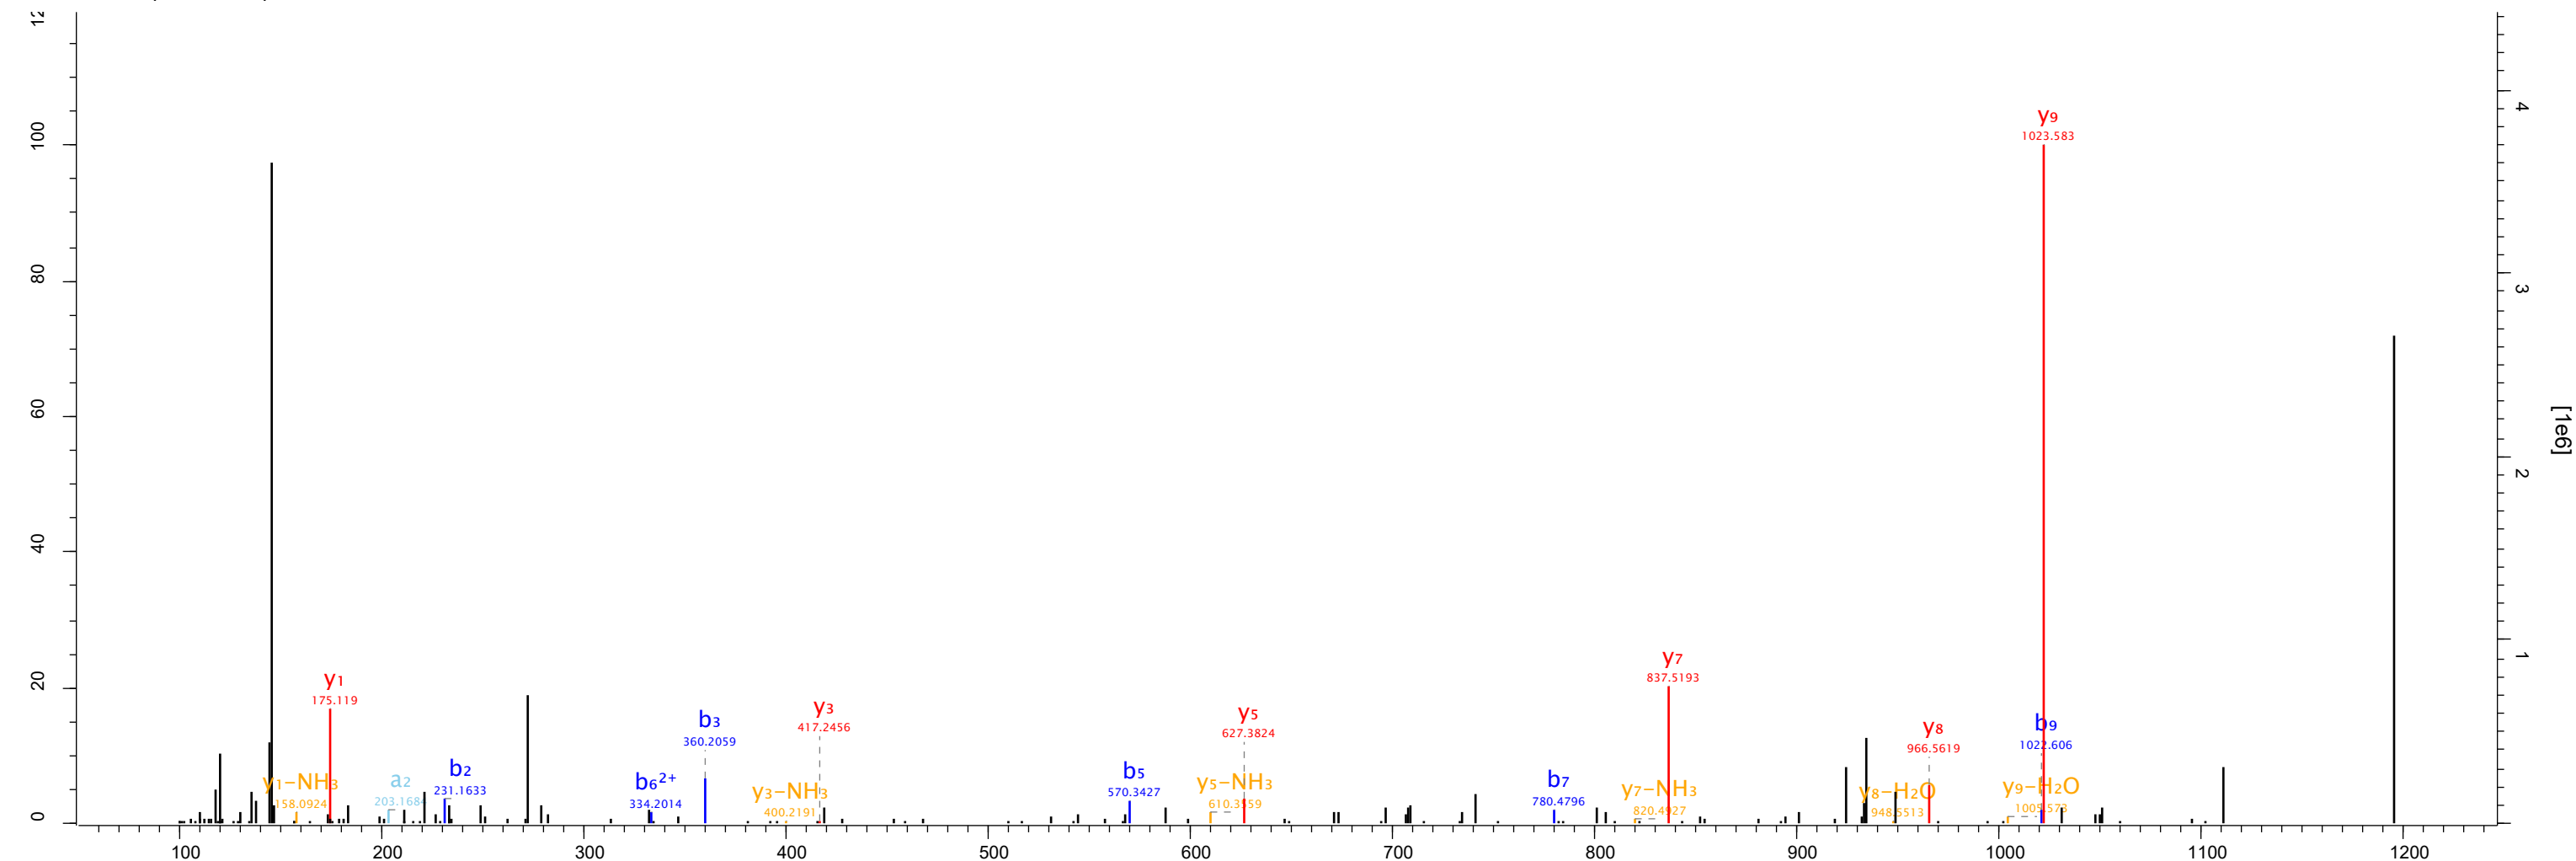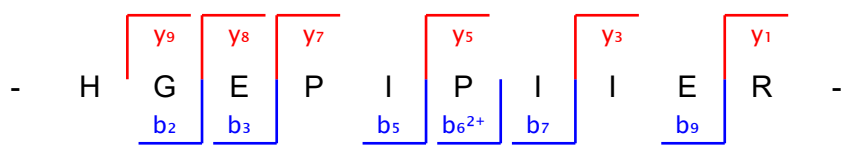



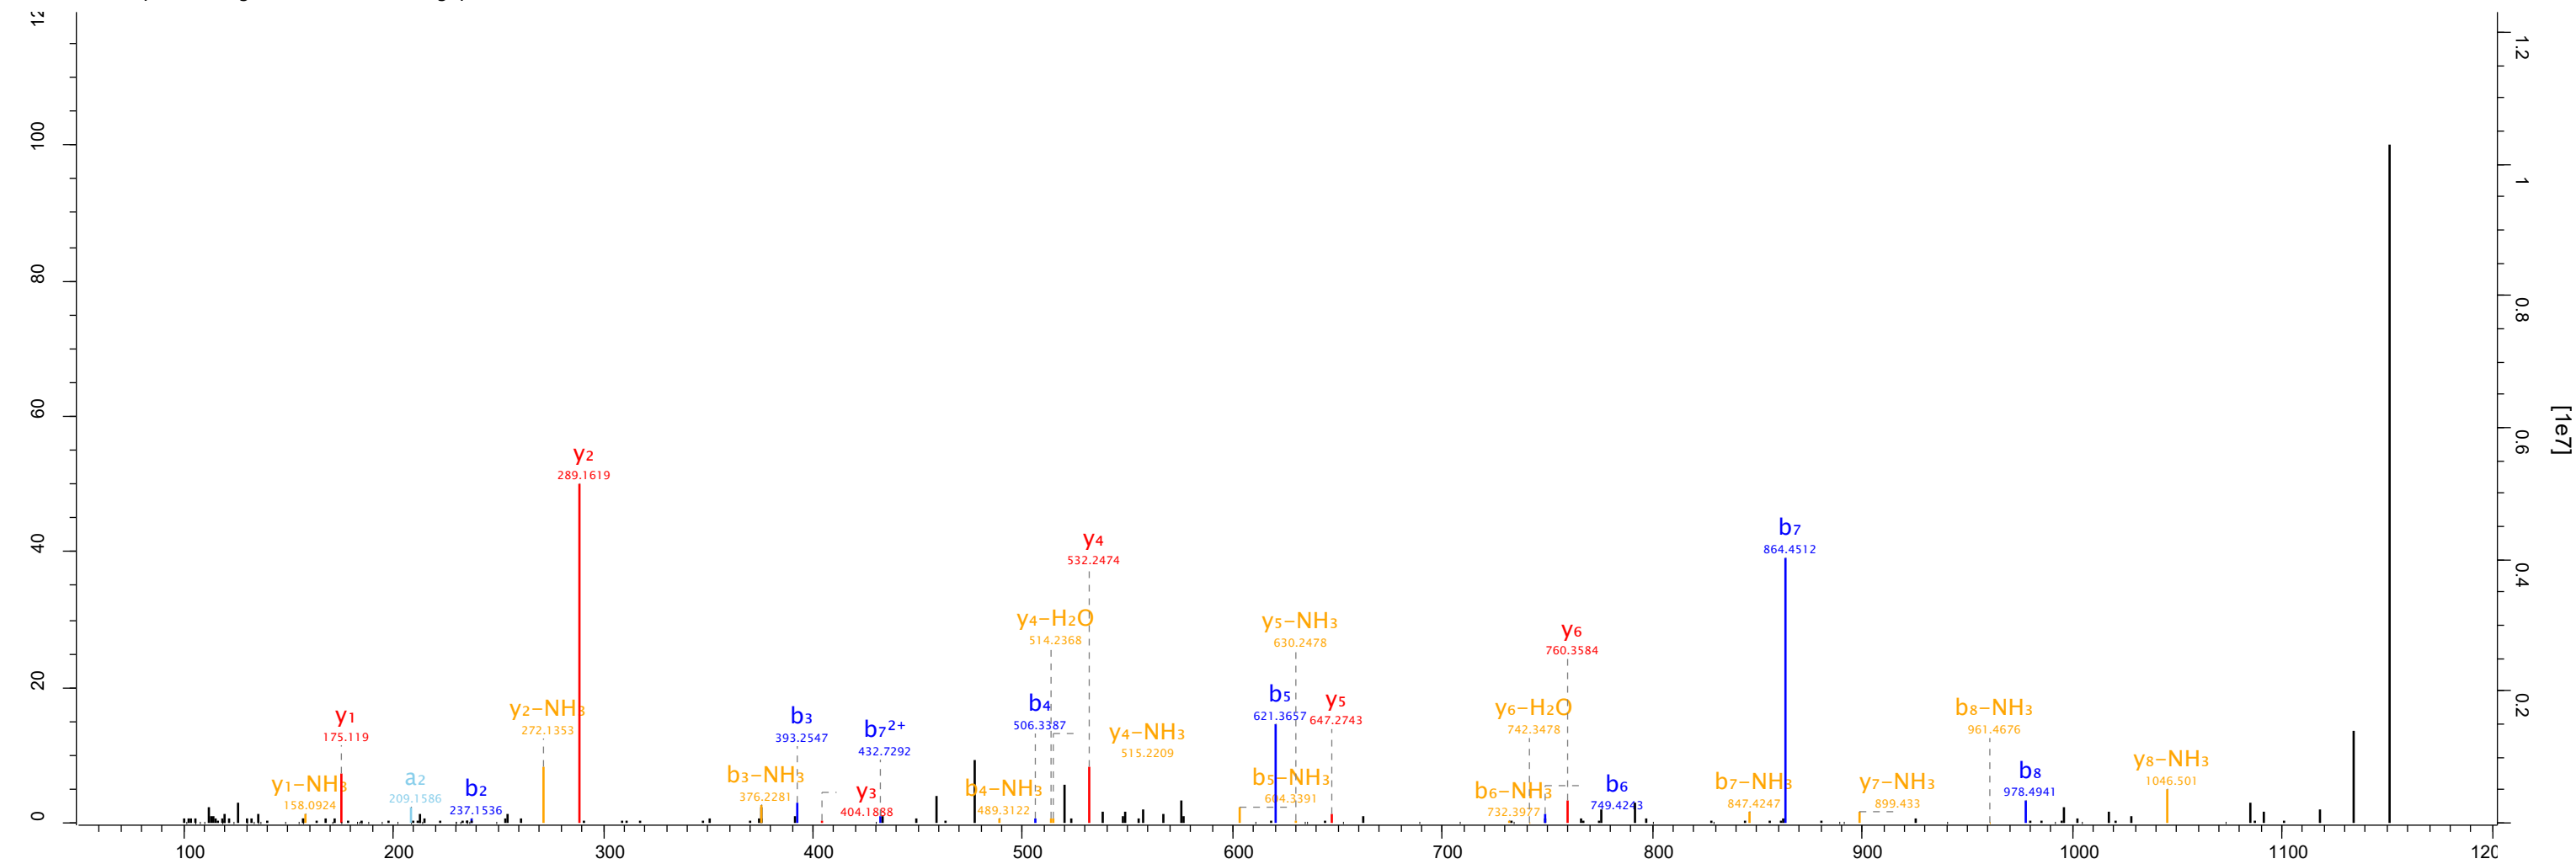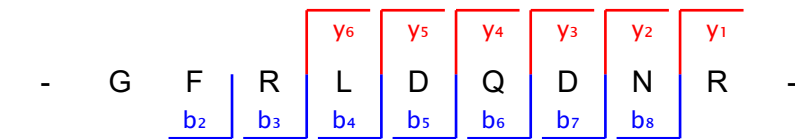

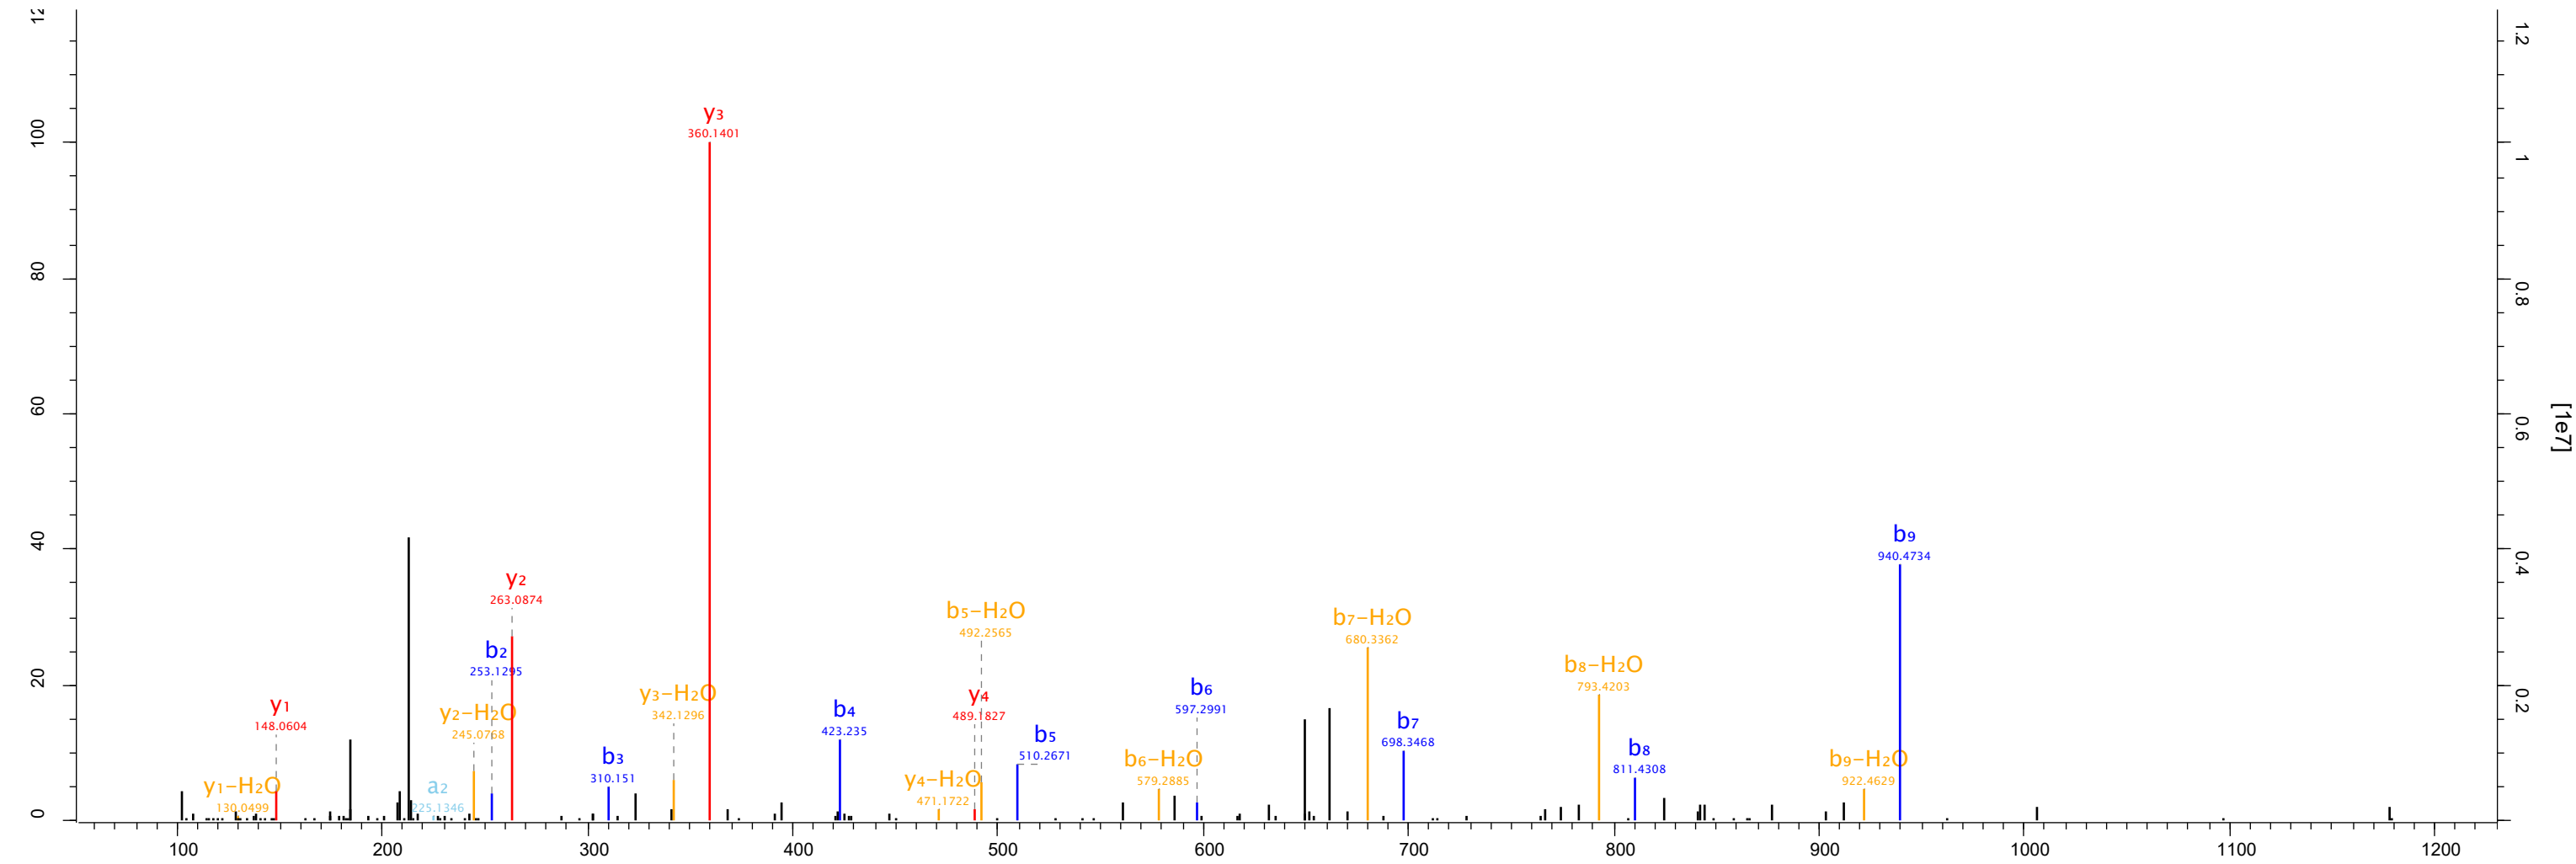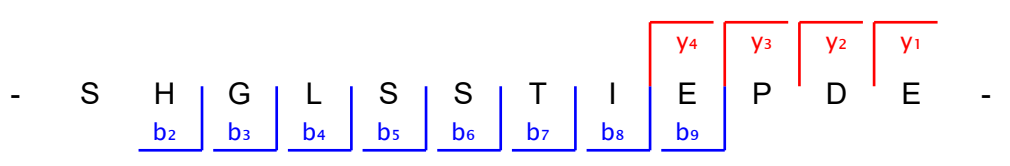



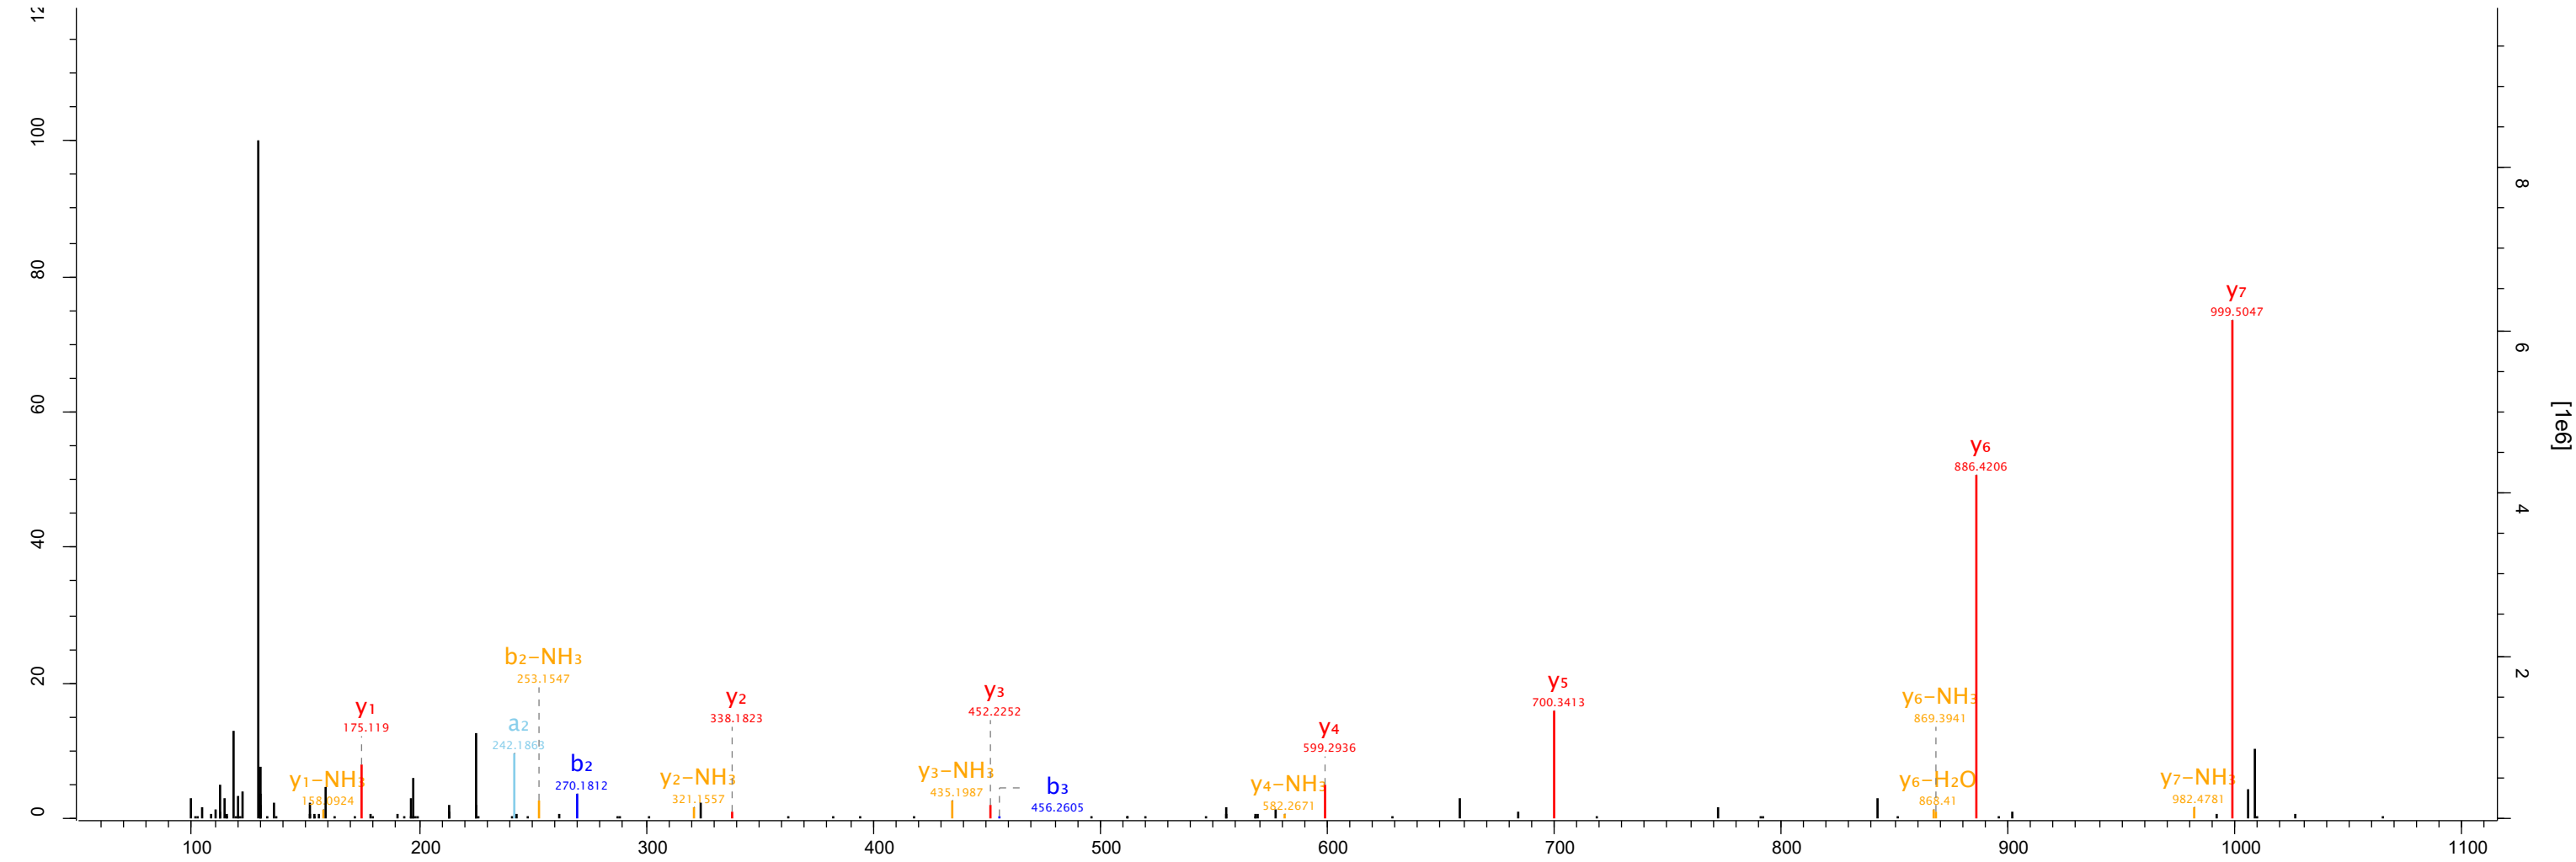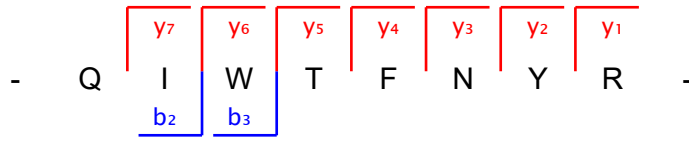

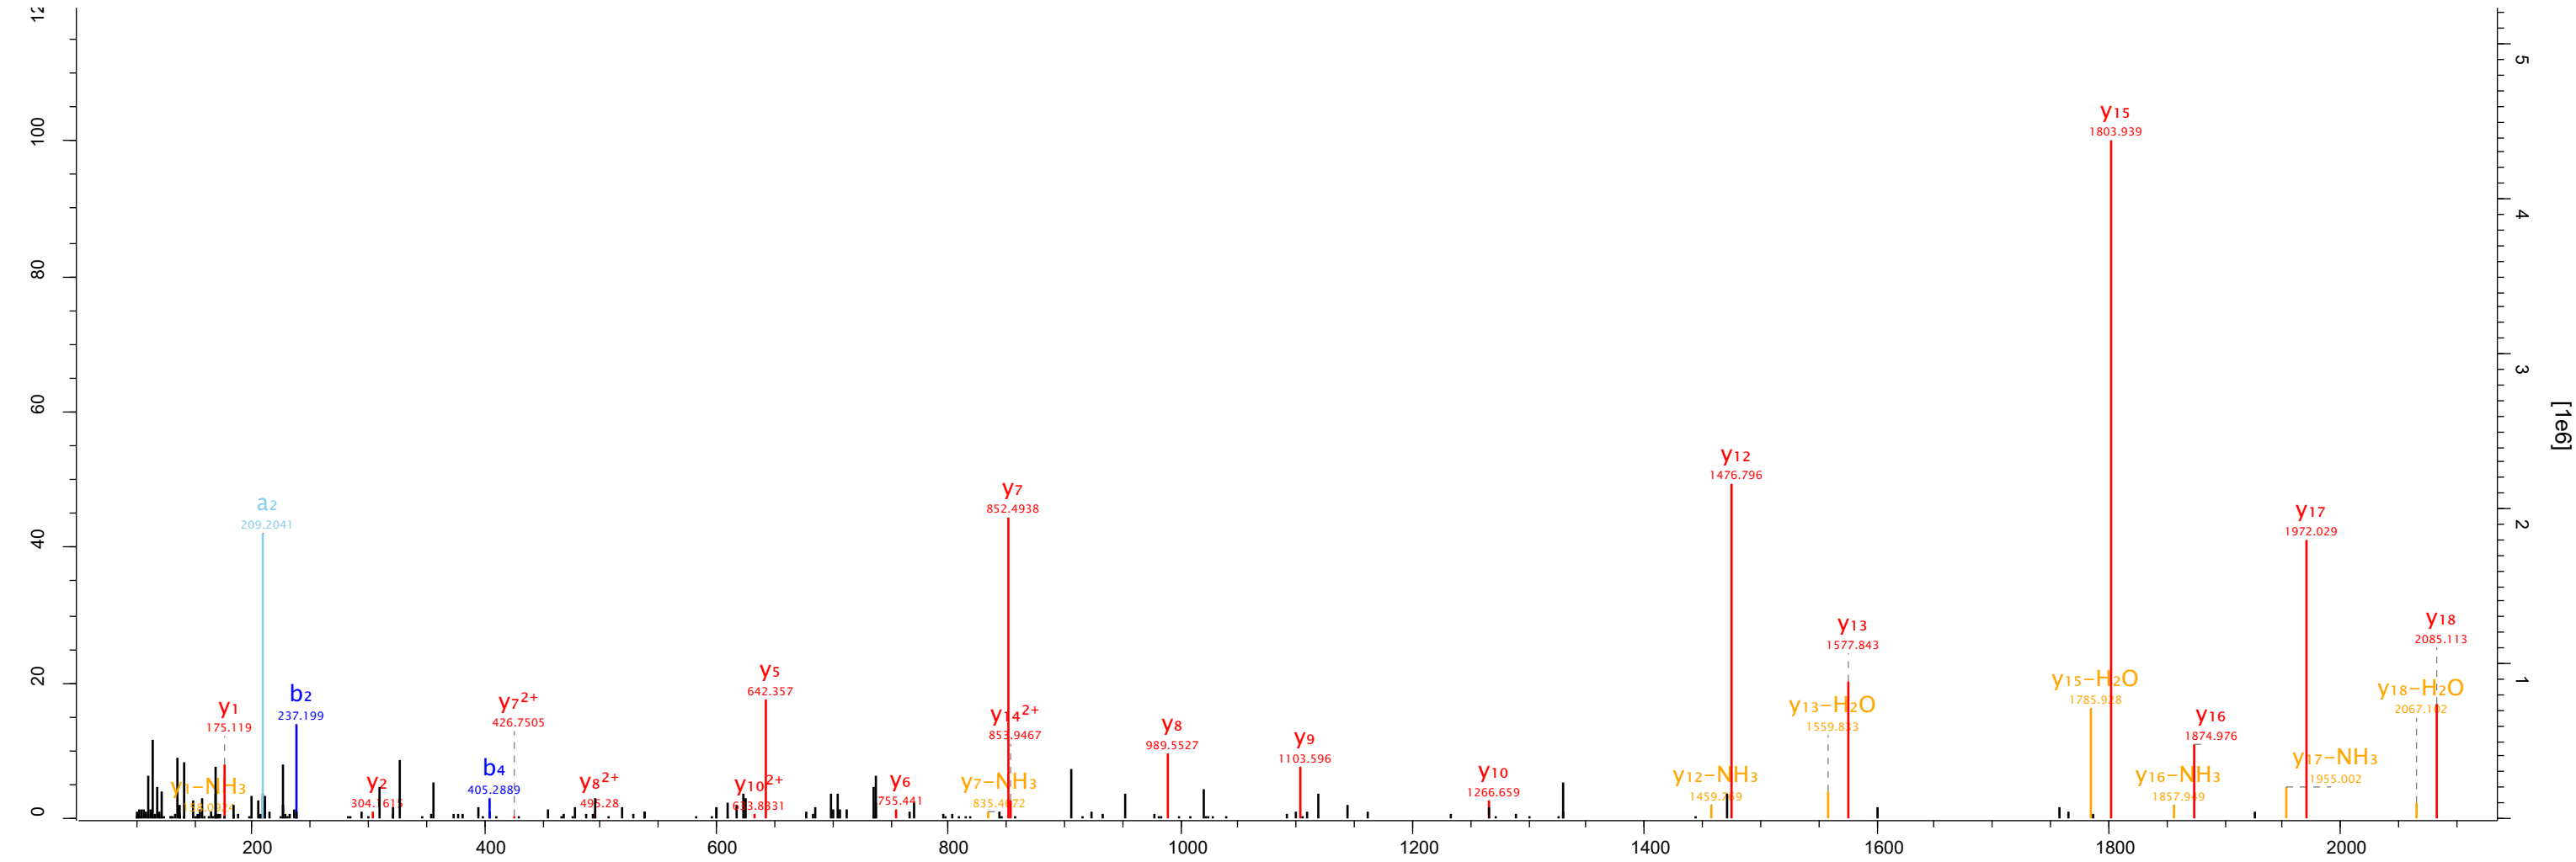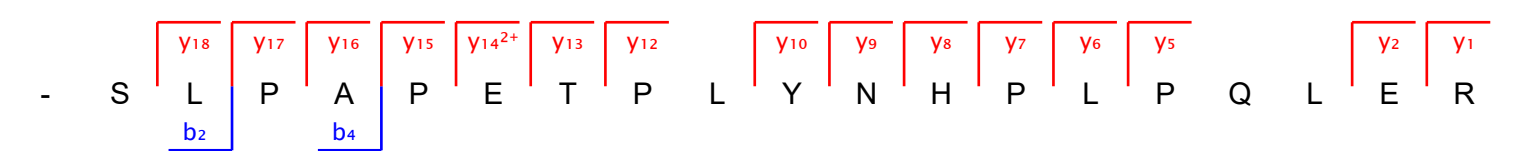

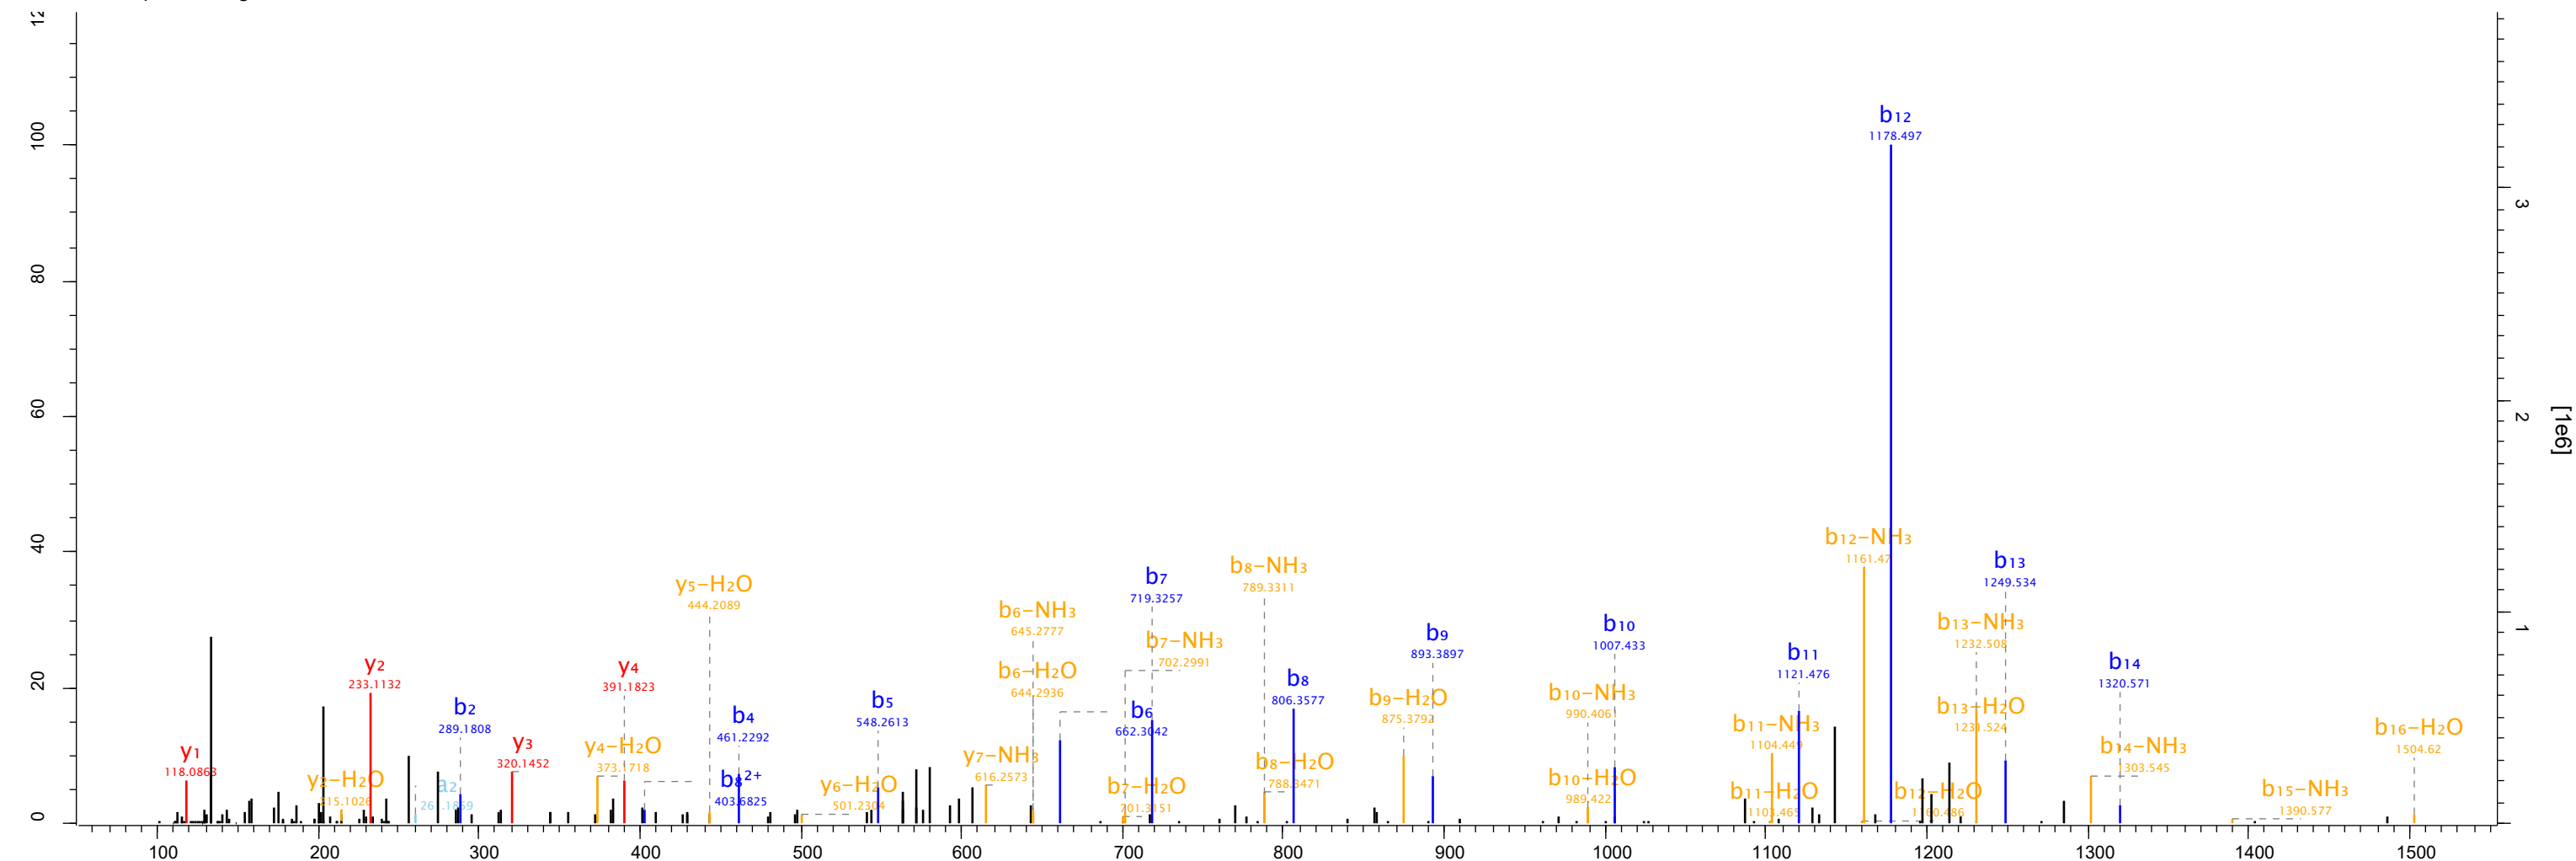

- Q Q G D S N G S S N N G A A S D V -

b<sub>2</sub>
b<sub>4</sub>
b<sub>5</sub>
b<sub>6</sub>
b<sub>7</sub>
b<sub>8</sub>
b<sub>9</sub>
b<sub>10</sub>
b<sub>11</sub>
b<sub>12</sub>
b<sub>13</sub>
b<sub>14</sub>
y<sub>4</sub>
y<sub>3</sub>
y<sub>2</sub>
y<sub>1</sub>

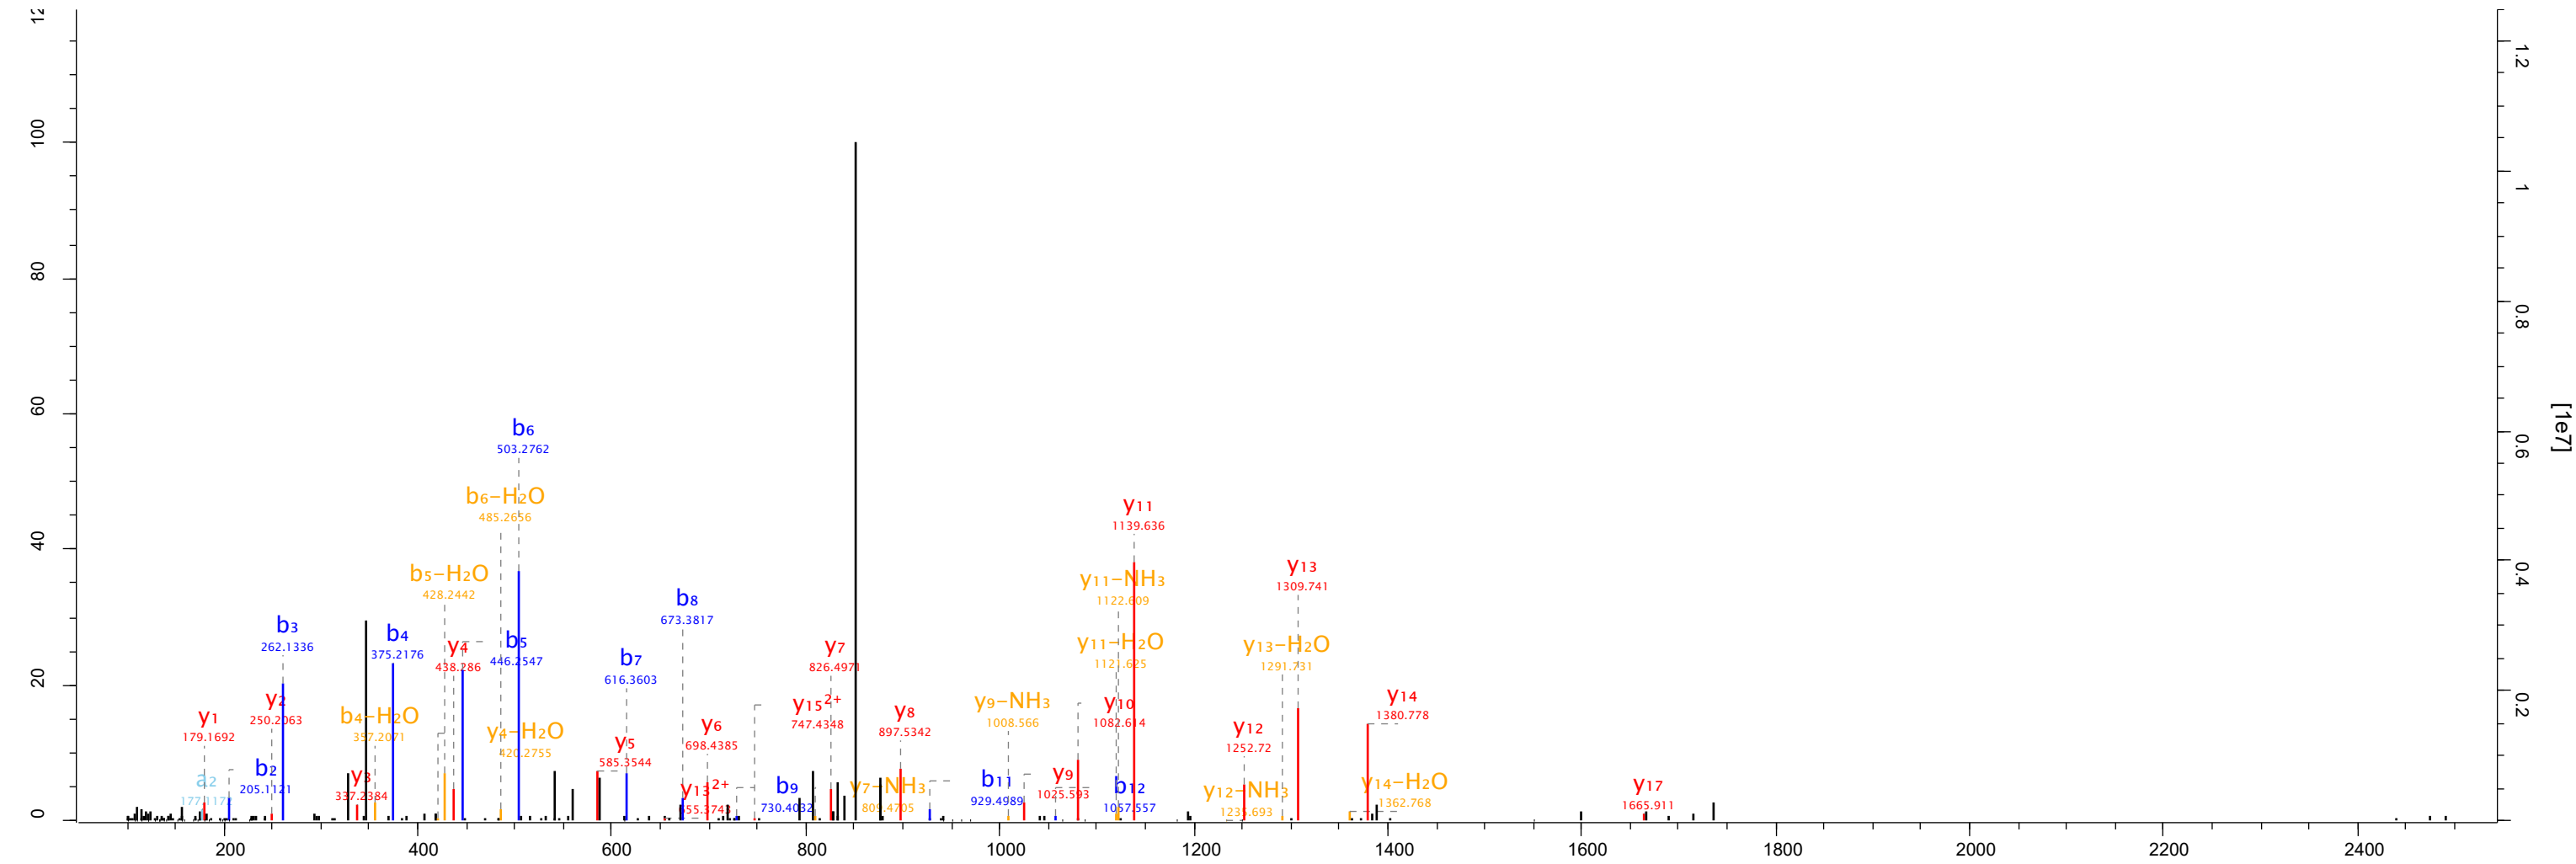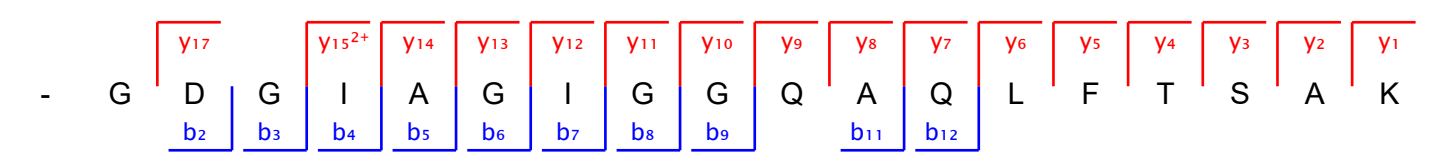

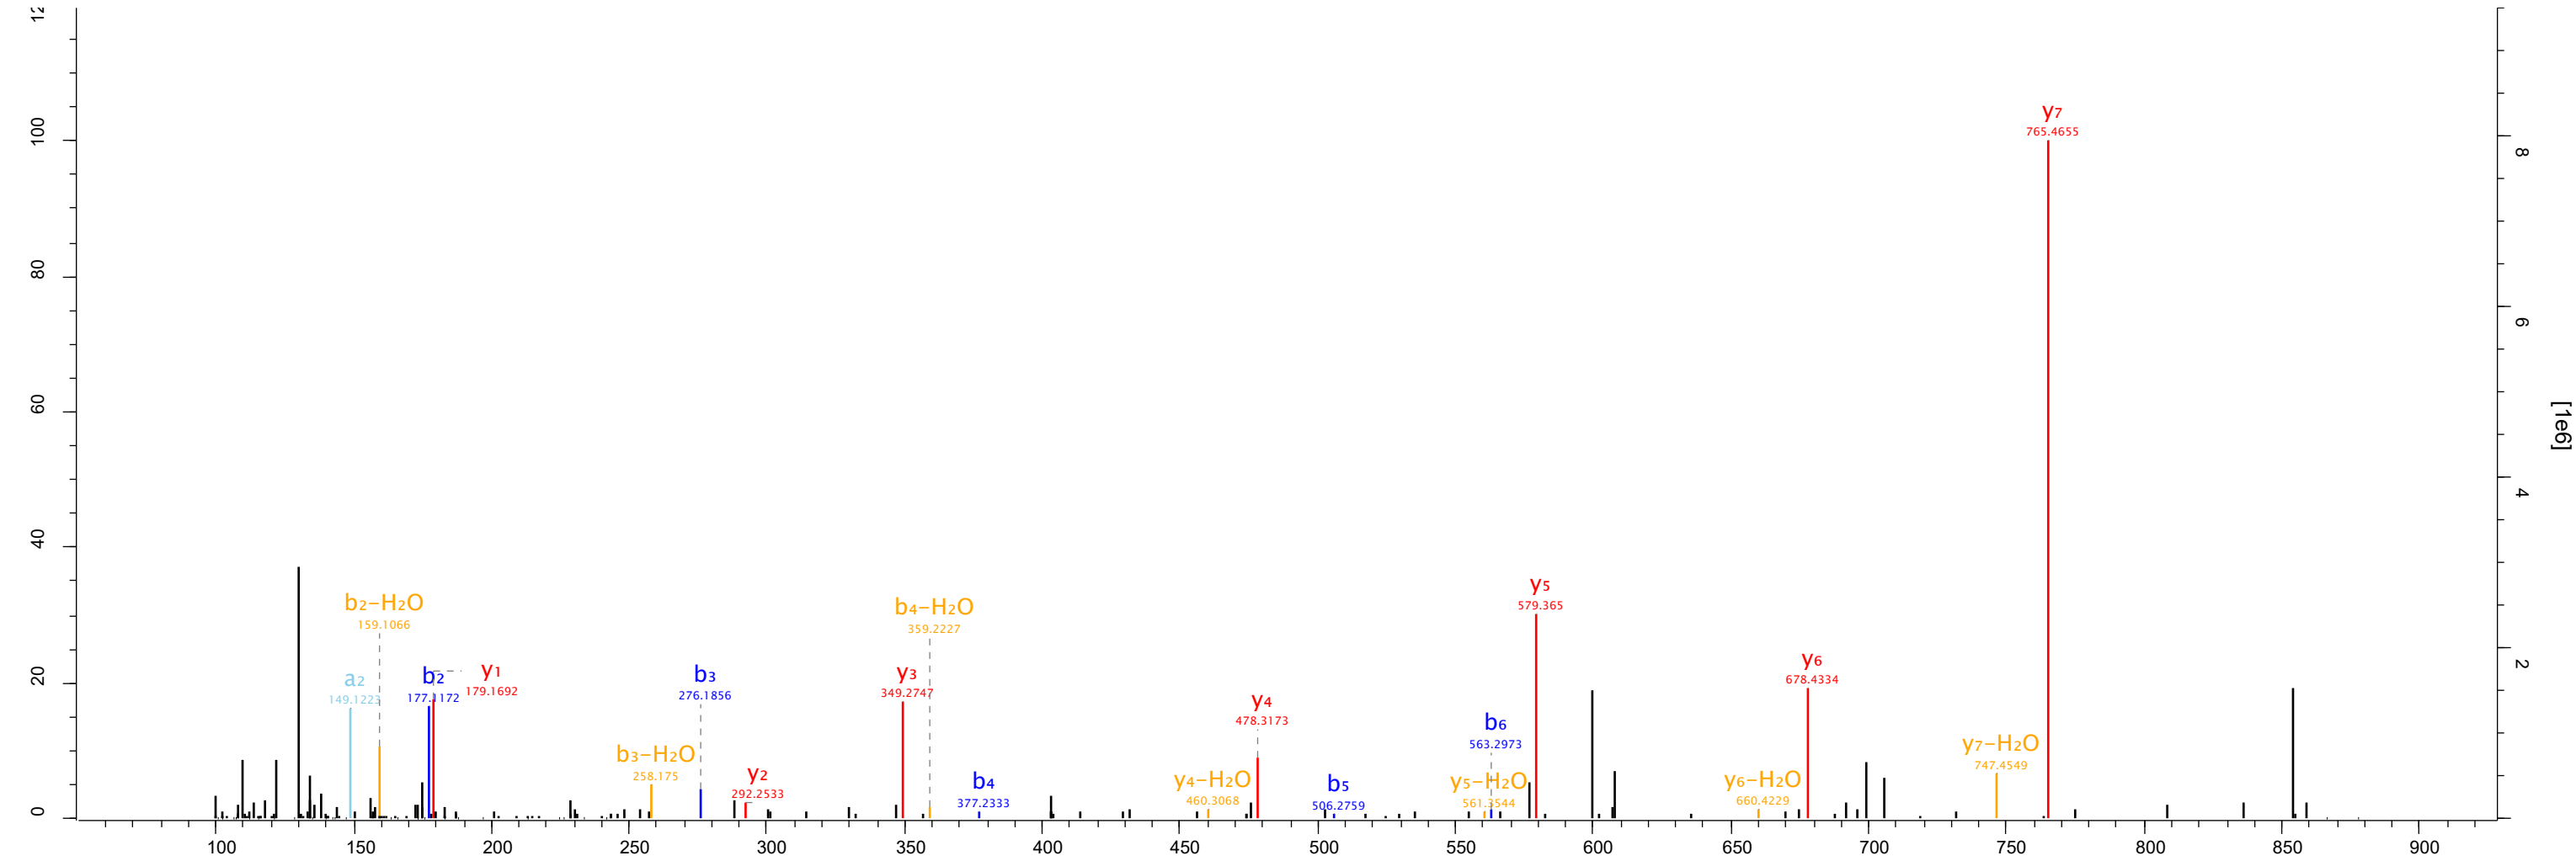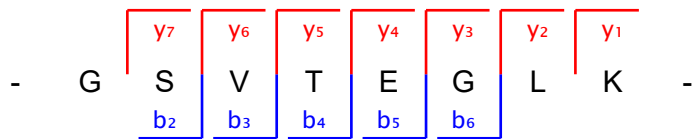

Supplement: 136184_1_supp_127661_p7rpy6.pdf [file 136184_1_supp_127661_p7rpy6.pdf]
