# Supplementary material
Source: PubMed Central journal article supplement (PMC6126389)
Supplement: 136184_1_supp_127622_p7r7y6.pdf [file 136184_1_supp_127622_p7r7y6.pdf]

## Supplementary Figures

### Chlorosis as a developmental program in cyanobacteria: The proteomic fundament of survival and awakening

#### Supplementary Figure 1:

Global phosphoproteome study

| Experiment  | time point | label | labeling efficiency* | total evidences |           |
|-------------|------------|-------|----------------------|-----------------|-----------|
| Replicate 1 | Labeling 1 | T0    | light                | 75.3%           | 2784      |
|             |            | T24   | intermediate         | 79.8%           | 3064      |
|             |            | T55   | heavy                | 98.0%           | 3980      |
|             | Labeling 2 | T2    | light                | 76.5%           | 2739      |
|             |            | T8    | intermediate         | 82.4%           | 3319      |
|             |            | T55   | heavy                | see above       | see above |
| Replicate 2 | Labeling 1 | T0    | light                | 94.1%           | 3133      |
|             |            | T24   | intermediate         | 95.4%           | 4395      |
|             |            | T55   | heavy                | 97.6%           | 3458      |
|             | Labeling 2 | T2    | light                | 95.5%           | 3161      |
|             |            | T8    | intermediate         | 96.6%           | 3360      |
|             |            | T55   | heavy                | see above       | see above |

\*: based on all detected evidences with intensities above zero

Proteomic study of CpcD mutants  
(compare Text Figure 7)

| condition     | mutant              | label        | labeling efficiency* | total evidences |
|---------------|---------------------|--------------|----------------------|-----------------|
| growth        | CpcD <sup>Ala</sup> | light        | 95.5%                | 7246            |
| growth        | WT                  | intermediate | 96.7%                | 7338            |
| growth        | CpcD <sup>Asp</sup> | heavy        | 97.6%                | 7299            |
| chlorosis     | CpcD <sup>Ala</sup> | light        | 94.7%                | 8003            |
| chlorosis     | WT                  | intermediate | 96.8%                | 8208            |
| chlorosis     | CpcD <sup>Asp</sup> | heavy        | 97.6%                | 7790            |
| resuscitation | CpcD <sup>Ala</sup> | light        | 95.7%                | 7300            |
| resuscitation | WT                  | intermediate | 97.5%                | 7457            |
| resuscitation | CpcD <sup>Asp</sup> | heavy        | 97.8%                | 6417            |

\*: based on all detected evidences with intensities above zero

**Supplementary Figure 1: Analysis of dimethyl-labeling efficiencies.** The ratio (in percent) of labeled to unlabeled peptide spectrum matches (evidences) were measured in pilot MS-measurements and are indicated per sample, together with the total number of detected evidences.

## Supplementary Figure 2:

| Fraction | Duration (min) | Flow (nL min <sup>-1</sup> ) | Gradient (% HPLC solvent B) |
|----------|----------------|------------------------------|-----------------------------|
| 1        | 73             | 200                          | 10-22                       |
|          | 3              | 200                          | 22-50                       |
|          | 3              | 200                          | 50-90                       |
|          | 8              | 500                          | 90 const.                   |
| 2        | 6              | 200                          | 10-14                       |
|          | 65             | 200                          | 14-24                       |
|          | 2              | 200                          | 24-29                       |
|          | 3              | 200                          | 29-50                       |
|          | 3              | 500                          | 50-90                       |
| 3        | 8              | 500                          | 90 const.                   |
|          | 24             | 200                          | 10-19                       |
|          | 44             | 200                          | 19-29                       |
|          | 5              | 200                          | 29-33                       |
|          | 3              | 200                          | 33-50                       |
|          | 3              | 500                          | 50-90                       |
| 4        | 8              | 500                          | 90 const.                   |
|          | 60             | 200                          | 10-27                       |
|          | 6              | 200                          | 27-33                       |
|          | 7              | 200                          | 33-50                       |
|          | 6              | 500                          | 50-90                       |
| 5        | 8              | 500                          | 90 const.                   |
|          | 5              | 200                          | 10-13                       |
|          | 56:30          | 200                          | 13-28                       |
|          | 4              | 200                          | 28-33                       |
|          | 7:30           | 200                          | 33-50                       |
|          | 6              | 500                          | 50-90                       |
| 6        | 8              | 500                          | 90 const.                   |
|          | 06:30          | 200                          | 10-14                       |
|          | 55             | 200                          | 14-28                       |
|          | 4              | 200                          | 28-33                       |
|          | 7:30           | 200                          | 33-50                       |
| 7        | 6              | 500                          | 50-90                       |
|          | 8              | 500                          | 90 const.                   |
|          | 3              | 200                          | 10-14                       |
|          | 59             | 200                          | 14-30                       |
|          | 2              | 200                          | 30-33                       |
|          | 9              | 200                          | 33-50                       |
| 8 & 9    | 6              | 500                          | 50-90                       |
|          | 8              | 500                          | 90 const.                   |
|          | 3              | 200                          | 10-14                       |
|          | 57:30          | 200                          | 14-27                       |
|          | 5              | 200                          | 27-33                       |
| 8 & 9    | 7:30           | 200                          | 33-50                       |
|          | 6              | 500                          | 50-90                       |
|          | 8              | 500                          | 90 const.                   |

**Supplementary Figure 2: Protein fraction specific nanoHPLC gradients for samples from high pH fractionation.** Step-wise linear nanoHPLC elution gradients are indicated for each peptide fraction (1-9), with indication of duration, flow rate and percentage of HPLC solvent B (80% v/v acetonitrile in 0.5% v/v formic acid (aq.)) relative to HPLC solvent A (0.5% v/v formic acid in water).

### Supplementary Figure 3:

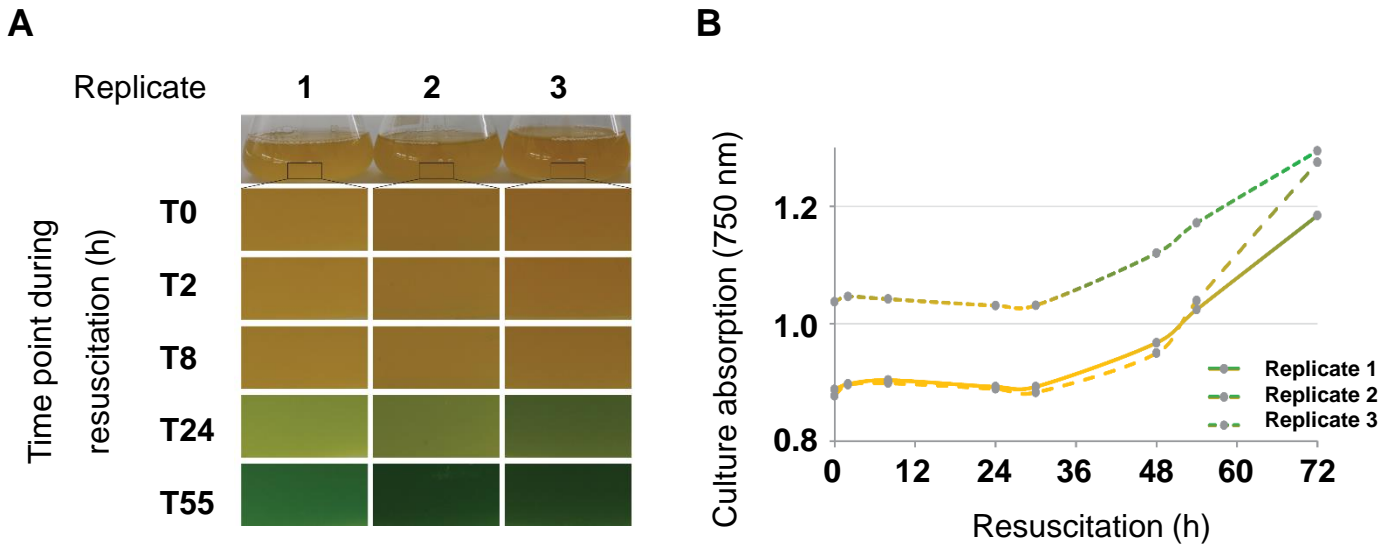

**Supplementary Figure 3: Visualization of the resuscitation process in *Synechocystis sp.*** (A) The resuscitation process was induced in three independent batch cultures in the chlorotic state (21 days nitrogen starvation at time point T0) by addition of nitrate (final concentration 10 mM). (B) Absorption measurements at 750 nm of re-greening cultures from panel (A) were performed at indicated time points (grey circles).

## Supplementary Figure 4:

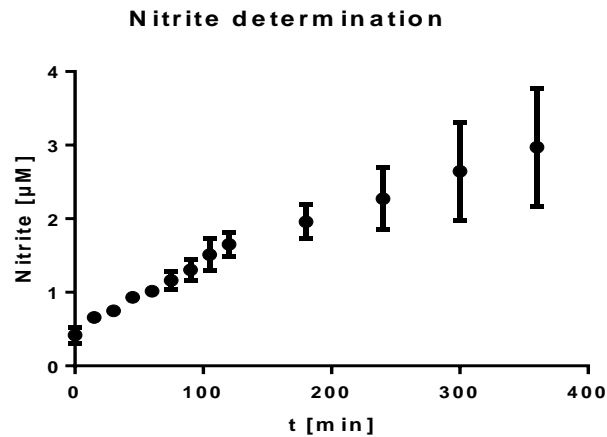

**Supplementary Figure 4: Determination of nitrite concentrations in the medium during early resuscitation.** Displayed nitrite concentrations (in  $\mu\text{M}$ ) were measured in the culture medium during the resuscitation process (in min) according to the method described by Snell and Snell (1949). Error bars indicate the standard error of mean.,  $n=3$ .

**Reference:** (Snell, F.D., and Snell, C.T. (1949). Colorimetric Methods of Analysis, F.D. Snell and C.T. Snell, eds (Van Nostrand Co.), pp. 802–807-802–807.

## Supplementary Figure 5:

**A**

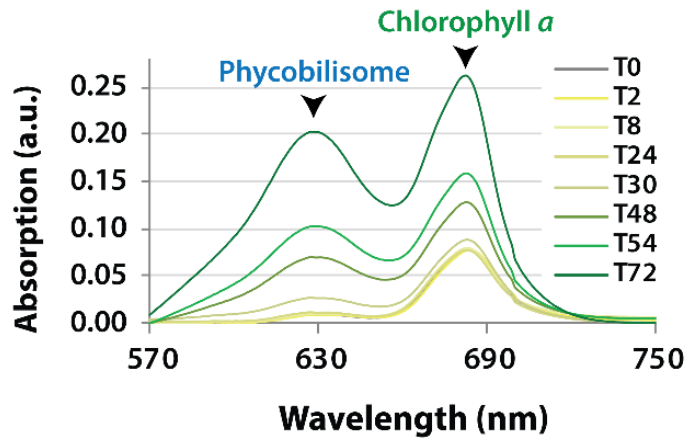

**B**

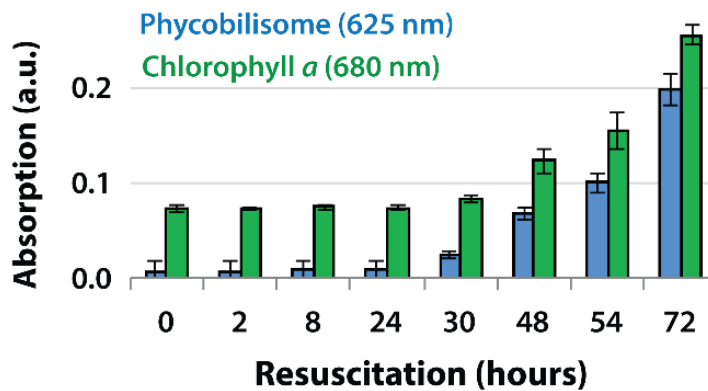

**Supplementary Figure 5: Pigment absorption during the resuscitation process in *Synechocystis* sp. (A)** Absorption spectra of photosynthetic pigments during resuscitation. Displayed curves represent an average from three independent batch cultures (see Supplementary Figure 3). **(B)** Absorption peaks of phycobilisomes (625 nm) and chlorophyll *a* (680 nm) extracted from spectra in panel (A). Error bars indicate the standard error of mean., n=3.

## Supplementary Figure 6:

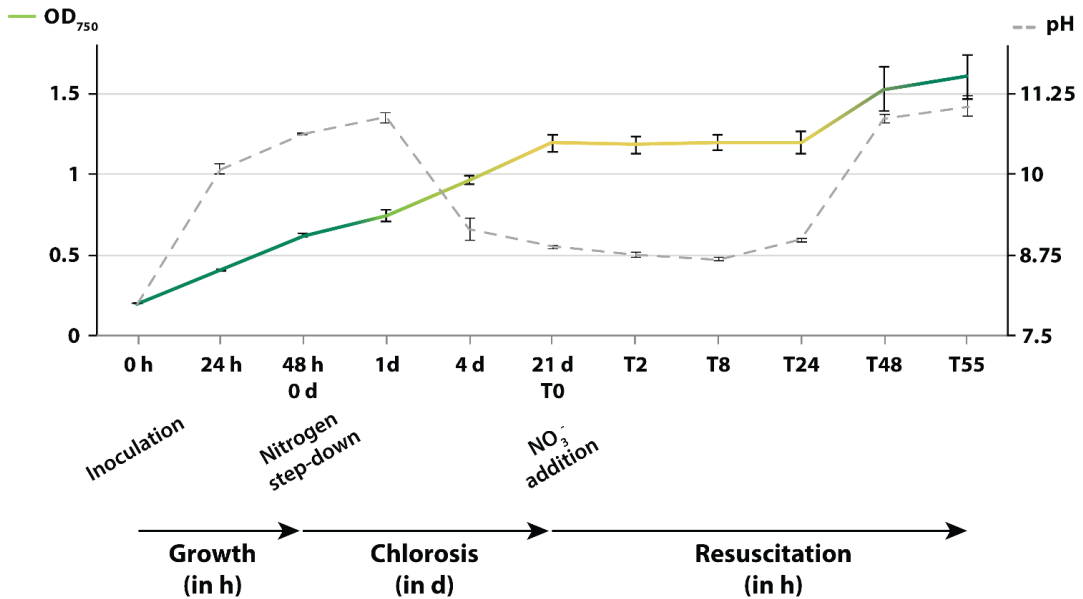

**Supplementary Figure 6: Growth curve of *Synechocystis* sp. cultures for phosphoproteomic experiments.** The optical density (at 750 nm; solid line; color gradient following culture appearance) and the culture medium pH (dotted line) were monitored during growth, chlorosis and resuscitation (not in scale) in 2.5 L batch cultures, bubbled with ambient air. Error bars indicate the standard error of mean., n=3.

## Supplementary Figure 7:

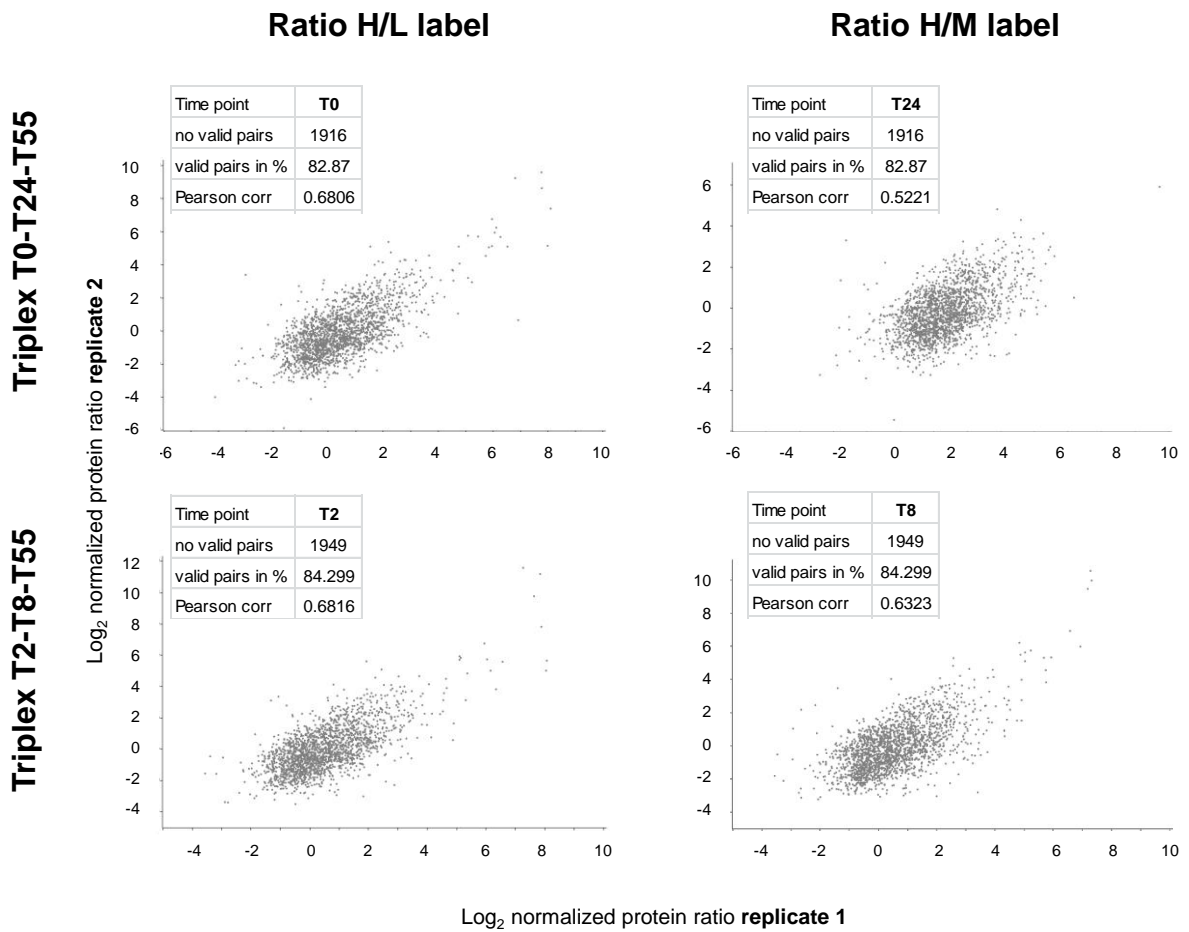

**Supplementary Figure 7: Correlation of protein ratios between replicates.** The detected protein ratios (in log<sub>2</sub> scale) relative to the reference point T55 are indicated in scatter plots and number of corresponding (paired) proteins in both replicates (number of valid pairs) and their percentage (valid pairs in %) compared to the total of identified proteins in the dataset are stated together with the calculated Pearson correlation coefficient between paired protein ratios. Dimethyl-labels were: light (L) for T0 (Triplex labeling of T0-T24-T55) and T2 (Triplex labeling of T2-T8-T55); intermediate (M) for T8 (in T2-T8-T55) and T24 (in T0-T24-T55); heavy (H) for T55 (in T0-T24-T55 and T2-T8-T55).

## Supplementary Figure 8:

| Timepoint | harvested volume (mL) | total protein (mg) | protein yield ( $\mu\text{g mL}^{-1}$ ) |
|-----------|-----------------------|--------------------|-----------------------------------------|
| T0        | 500                   | 2.74               | 5.47                                    |
| T2        | 500                   | 2.59               | 5.19                                    |
| T8        | 400                   | 2.14               | 5.35                                    |
| T24       | 400                   | 2.73               | 6.83                                    |
| T55       | 500                   | 9.70               | 19.41                                   |

**Supplementary Figure 8: Protein yields from 2.5 L batch cultures.** Harvested culture volume per time point, the respective total protein yield (in mg) and relative protein yield (in  $\mu\text{g protein mL}^{-1}$  culture) are indicated (compare to Supplementary Figure 6).



## Supplementary Figure 9:

### Co-regulation of ribosomes during resuscitation

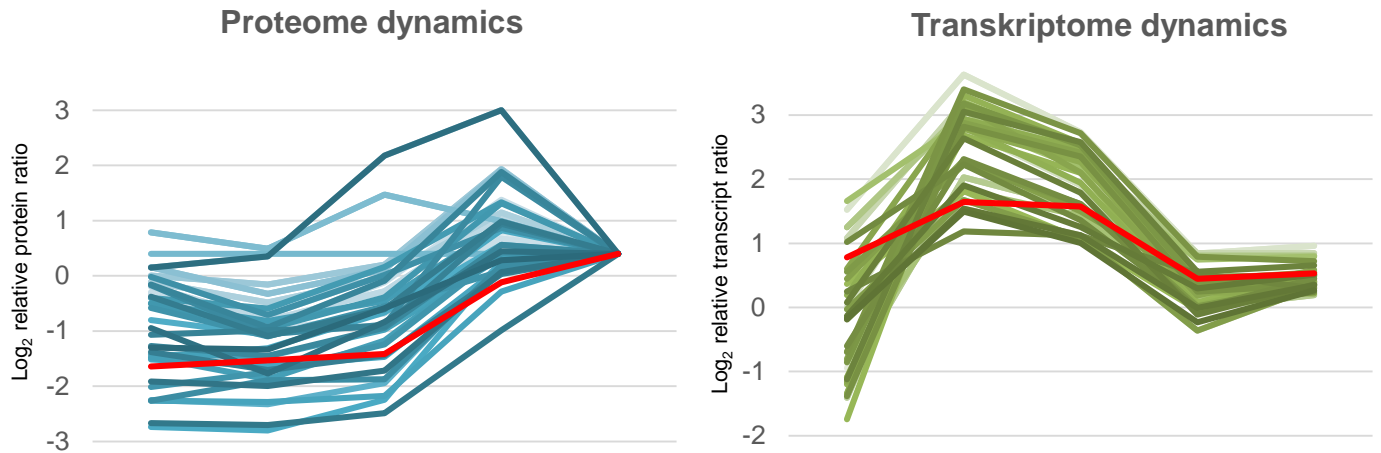

**Supplementary Figure 9: Relative dynamics of ribosomal proteins and their corresponding transcripts during resuscitation.** Protein ratios of 50 ribosomal subunits from the present study (left panel; in log<sub>2</sub> scale) and corresponding transcript ratios (right panel; from Klotz et al. (2016)) are displayed. The detected protein and transcript dynamics of the hypothetical protein Slr0923 are indicated by a red line, respectively.

## Supplementary Figure 10:

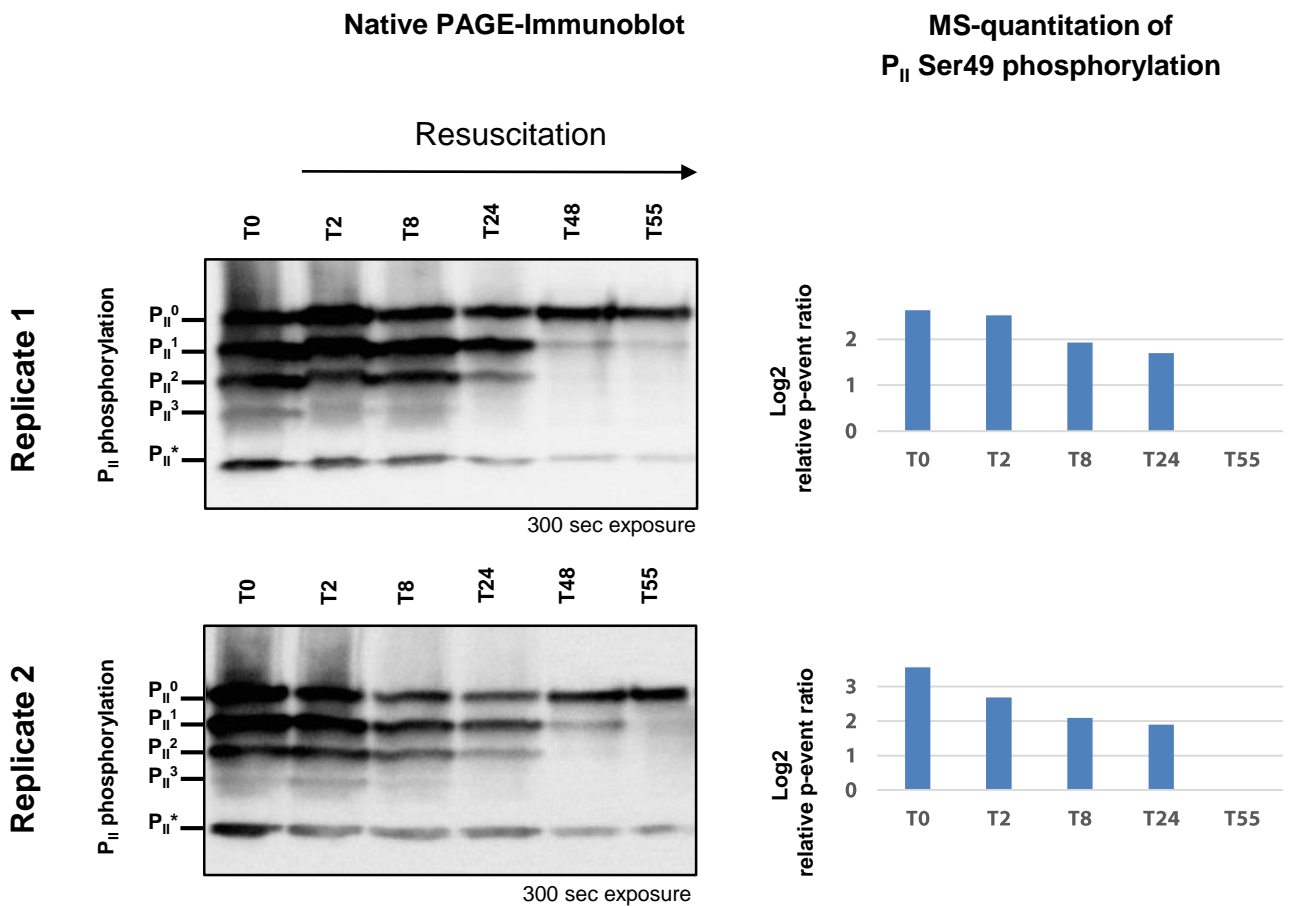

**Supplementary Figure 10: Coherence of  $P_{II}$  phosphorylation dynamics between replicates.** The phosphorylation level of the homotrimeric  $P_{II}$  protein was analyzed during the resuscitation process in samples for phosphoproteome experiments by Native PAGE-Immunoblot and MS-based detection (MS ratios relative to T55 in  $\log_2$  scale). Separated protein bands in native PAGE-Immunoblot analyses correspond to unphosphorylated ( $P_{II}^0$ ), and single, double or triple phosphorylated ( $P_{II}^{1-3}$ )  $P_{II}$  trimers, respectively (compare to Spät et al. 2015). The protein bands indicated by \* are only detectable after long-term chlorosis and potentially corresponds to further modification. Native PAGE-Immunoblot analyses were conducted as described in Spät et al. (2015) utilizing self-casted 8% native polyacrylamide gels as described in Forchhammer and Tandeau de Marsac (1994).

## Supplementary Figure 11:

### Chlorophyll *a* content in *Synechocystis* sp. CpcD mutants

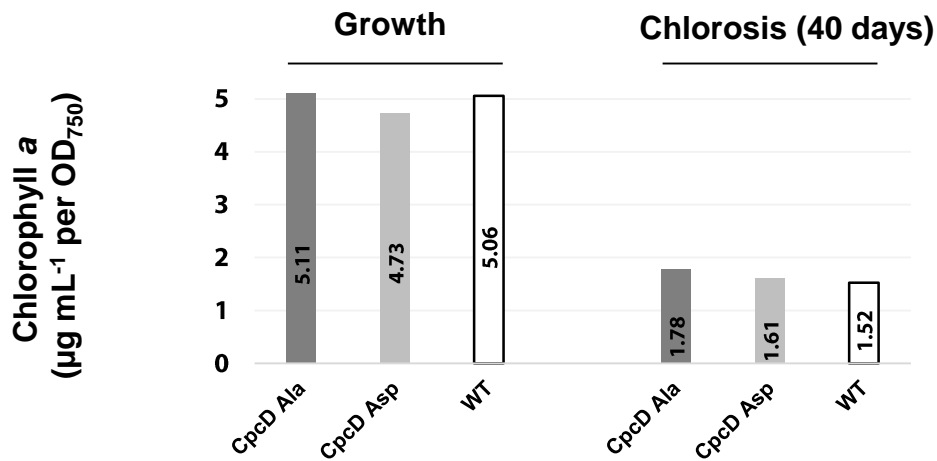

**Supplementary Figure 11: Chlorophyll *a* content of *Synechocystis* sp. CpcD mutants and wild-type at vegetative and chlorotic conditions.** Cellular chlorophyll *a* concentrations were determined according to Lichtenthaler (1987).

**Reference: Lichtenthaler, H.K. (1987).** Chlorophylls and carotenoids: Pigments of photosynthetic biomembranes. *Methods in Enzymology* 148, 350-382.

## Supplementary Figure 12:

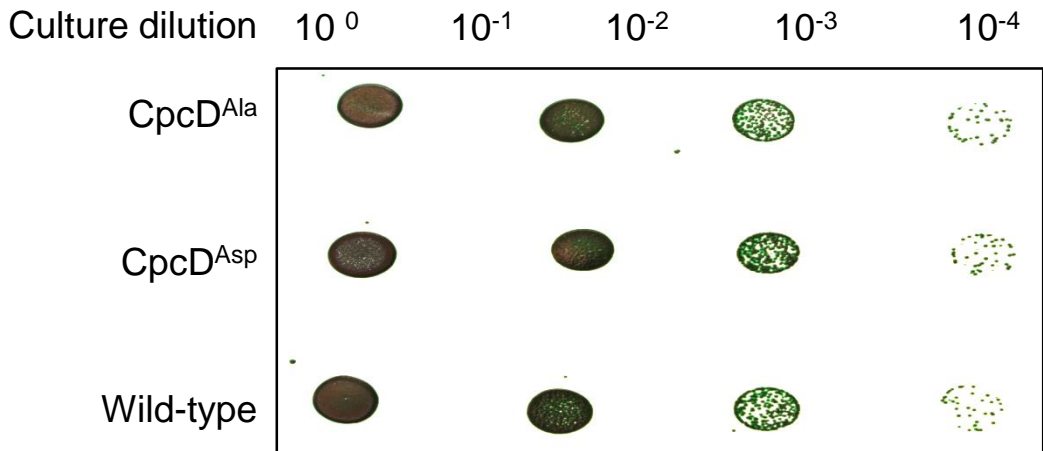

**Supplementary Figure 12: Test of mutant viability.** Dilution plating of 21 days chlorotic *Synechocystis* sp. CpcD mutant and wild-type cultures (at  $OD_{750}=0.6$ , corresponding to undiluted plating) on nitrate supplemented BG11 agar. The resuscitation ) after 7 days at standard cultivation conditions is shown (see Methods).

## Supplementary Figure 13:

| Protein name        | Cyanobase ID | Phycobilisome component | Nitrogen depletion study; Spät et al., 2015    |                         | Present study |       |       |       |       |   |
|---------------------|--------------|-------------------------|------------------------------------------------|-------------------------|---------------|-------|-------|-------|-------|---|
|                     |              |                         | Experiment 1                                   | Experiment 2            | Resuscitation |       |       |       |       |   |
|                     |              |                         | 24 h -N/NO <sub>3</sub>                        | 24 h -N/NO <sub>3</sub> | T0            | T2    | T8    | T24   | T55   |   |
| Core components     | ApcA         | slr2067                 | Allophycocyanin alpha chain                    | 0.95                    | 0.93          | 0.024 | 0.025 | 0.031 | 0.232 | 1 |
|                     | ApcB         | slr1986                 | Allophycocyanin beta chain                     | 0.94                    | 0.76          | 0.022 | 0.023 | 0.033 | 0.407 | 1 |
|                     | ApcC         | ssr3383                 | Phycobilisome small core linker polypeptide    | 0.95                    | 0.67          | 0.027 | 0.025 | 0.028 | 0.242 | 1 |
|                     | ApcD         | slI0928                 | Allophycocyanin subunit alpha-B                | 0.94                    | 0.79          | 0.011 | 0.010 | 0.023 | 0.106 | 1 |
|                     | ApcE         | slr0335                 | Phycobilisome core-membrane linker polypeptide | 1.04                    | 0.72          | 0.047 | 0.037 | 0.052 | 0.360 | 1 |
|                     | ApcF         | slr1459                 | Allophycocyanin subunit beta                   | 0.97                    | 0.91          | 0.014 | 0.015 | 0.023 | 0.291 | 1 |
| Antennae components | CpcA         | slI1578                 | Phycocyanin alpha subunit                      | 0.55                    | 0.32          | 0.008 | 0.010 | 0.014 | 0.138 | 1 |
|                     | CpcB         | slI1577                 | Phycocyanin beta subunit                       | 0.56                    | 0.34          | 0.003 | 0.004 | 0.009 | 0.238 | 1 |
|                     | CpcC1        | slI1580                 | Phycobilisome 32.1 kDa linker polypeptide      | 0.54                    | 0.37          | 0.003 | 0.004 | 0.006 | 0.153 | 1 |
|                     | CpcC2        | slI1579                 | Phycobilisome 32.1 kDa linker polypeptide      | 0.15                    | 0.07          | 0.003 | 0.003 | 0.004 | 0.089 | 1 |
|                     | CpcD         | ssI3093                 | Phycobilisome small rod linker polypeptide     | 0.88                    | 0.83          | 0.003 | 0.004 | 0.006 | 0.126 | 1 |
|                     | CpcG1        | slr2051                 | Phycobilisome rod-core linker polypeptide;     | 0.91                    | 1.01          | 0.015 | 0.017 | 0.018 | 0.183 | 1 |
|                     | CpcG2        | slI1471                 | Phycobilisome rod-core linker polypeptide      | 0.11                    | 0.04          | 0.028 | 0.029 | 0.029 | 0.442 | 1 |

**Supplementary Figure 13: Dynamics of phycobiliproteins during chlorosis and resuscitation.** Protein ratios of phycobilisome components during initial chlorosis (24 h nitrogen depletion relative to vegetative growth conditions) were retrieved from our previous study (Spät et al., 2015; with two experiments with slightly divergent cultivation conditions). The dynamics of corresponding proteins during resuscitation (detected in the present study) are indicated on the right panel.

**Reference: Spät, P., Macek, B., and Forchhammer, K. (2015).** Phosphoproteome of the cyanobacterium *Synechocystis* sp. PCC 6803 and its dynamics during nitrogen starvation. *Frontiers in Microbiology* 6.
